# Supplementary material for: How to tune the absorption spectrum of chlorophylls to enable better use of the available solar spectrum
Source: PeerJ journal article supplement (doi:10.7717/peerj-pchem.26), 2022-12-19
Supplement: Grficos_modificaes_duplas.xlsx [file Grficos_modificaes_duplas.xlsx]

## Sheet: Folha1
	Chlorophyll a		8-CHO-2-CHCH2		8-CHO-2-CHO		8-CHO		8-CHO-3-CH3		8-CHO-3-CHO		8-CHO-7-CHCH2	8-CHO-7-CHO			8-CHCH2-2-CHCH2		8-CHCH2-2-CHO		8-CHCH2-3-CH3		3-CHO-8-CHCH2_a		8-CHCH2-12-CHCH2		8-CHCH2-12-CHO		8-CHO-12-CHO		8-CHO-12-CHCH2		8-CHCH2-7-CHCH2		8-CHCH2-7-CHO		12-CHCH2		12-CHO		8-CHCH2		8-CHO		12-CHCH2		12-CHO		2-CHCH2
245.404	6.09429e-12	280.012	4.33427e-13	291.998	3.66463e-13	263.674	1.25059e-12	254.922	1.80985e-11	295.62	5.9014e-13	273.506	1.31245e-12	310.098	6.46318e-13	266.009	1.74895e-12	275.927	1.97635e-13	259.396	2.7143e-11	278.502	3.29849e-13	266.216	4.89735e-13	271.407	2.30156e-13	304.058	7.36565e-13	282.061	5.27064e-13	263.158	9.04224e-12	291.087	6.29465e-12	249.98	2.48277e-12	264.366	9.17895e-13	260.428	7.4327e-12	263.674	1.25059e-12	249.98	2.48277e-12	264.366	9.17895e-13	255.007	3.43466e-12
245.704	7.15191e-12	280.295	5.0565e-13	292.282	4.29206e-13	263.961	1.45807e-12	255.209	2.10696e-11	295.899	6.7375e-13	273.791	1.53102e-12	310.355	7.44323e-13	266.305	2.05918e-12	276.225	2.33207e-13	259.68	3.15268e-11	278.797	3.88955e-13	266.517	5.7796e-13	271.709	2.72429e-13	304.342	8.63585e-13	282.349	6.17487e-13	263.447	1.05522e-11	291.352	7.24677e-12	250.291	2.94452e-12	264.67	1.08526e-12	260.718	8.68167e-12	263.961	1.45807e-12	250.291	2.94452e-12	264.67	1.08526e-12	255.31	4.05315e-12
246.004	8.38844e-12	280.578	5.89617e-13	292.565	5.02442e-13	264.249	1.6991e-12	255.497	2.4516e-11	296.177	7.68848e-13	274.077	1.78511e-12	310.612	8.56862e-13	266.601	2.42315e-12	276.523	2.75031e-13	259.963	3.66004e-11	279.092	4.58408e-13	266.817	6.81699e-13	272.012	3.22283e-13	304.625	1.01201e-12	282.637	7.23052e-13	263.735	1.23079e-11	291.616	8.33932e-12	250.601	3.49008e-12	264.973	1.2824e-12	261.007	1.01353e-11	264.249	1.6991e-12	250.601	3.49008e-12	264.973	1.2824e-12	255.614	4.78031e-12
246.304	9.8333e-12	280.862	6.87188e-13	292.849	5.87884e-13	264.536	1.97897e-12	255.785	2.85116e-11	296.456	8.76962e-13	274.362	2.08031e-12	310.868	9.86042e-13	266.898	2.84991e-12	276.82	3.24178e-13	260.247	4.24696e-11	279.388	5.39972e-13	267.118	8.03611e-13	272.314	3.81047e-13	304.908	1.18536e-12	282.925	8.46233e-13	264.024	1.43484e-11	291.881	9.59245e-12	250.912	4.13426e-12	265.276	1.51451e-12	261.297	1.18264e-11	264.536	1.97897e-12	250.912	4.13426e-12	265.276	1.51451e-12	255.917	5.63472e-12
246.603	1.15206e-11	281.145	8.0051e-13	293.133	6.87515e-13	264.823	2.30376e-12	256.073	3.31414e-11	296.735	9.99814e-13	274.647	2.42312e-12	311.125	1.13427e-12	267.194	3.35002e-12	277.118	3.81899e-13	260.531	4.92557e-11	279.683	6.35707e-13	267.418	9.46798e-13	272.617	4.5027e-13	305.191	1.38772e-12	283.213	9.89893e-13	264.312	1.67186e-11	292.146	1.10292e-11	251.222	4.89443e-12	265.579	1.78761e-12	261.586	1.37925e-11	264.823	2.30376e-12	251.222	4.89443e-12	265.579	1.78761e-12	256.221	6.63808e-12
246.903	1.34901e-11	281.429	9.32059e-13	293.416	8.03633e-13	265.111	2.6805e-12	256.361	3.85033e-11	297.014	1.13935e-12	274.933	2.82101e-12	311.382	1.30427e-12	267.49	3.93579e-12	277.416	4.49652e-13	260.815	5.70977e-11	279.978	7.48016e-13	267.719	1.11488e-12	272.919	5.3177e-13	305.474	1.62382e-12	283.501	1.15735e-12	264.601	1.94704e-11	292.411	1.26756e-11	251.533	5.79094e-12	265.882	2.10877e-12	261.876	1.60772e-11	265.111	2.6805e-12	251.533	5.79094e-12	265.882	2.10877e-12	256.524	7.81568e-12
247.203	1.57874e-11	281.712	1.08469e-12	293.7	9.38898e-13	265.398	3.11726e-12	256.649	4.47099e-11	297.292	1.29775e-12	275.218	3.28258e-12	311.639	1.4992e-12	267.786	4.62148e-12	277.714	5.29136e-13	261.098	6.61557e-11	280.273	8.79693e-13	268.019	1.31207e-12	273.222	6.27668e-13	305.757	1.89916e-12	283.789	1.35244e-12	264.889	2.26635e-11	292.675	1.45615e-11	251.843	6.84759e-12	266.185	2.48621e-12	262.165	1.87309e-11	265.398	3.11726e-12	251.843	6.84759e-12	266.185	2.48621e-12	256.828	9.19697e-12
247.503	1.84657e-11	281.996	1.26169e-12	293.984	1.09639e-12	265.685	3.62335e-12	256.937	5.18904e-11	297.571	1.4775e-12	275.503	3.81776e-12	311.896	1.72259e-12	268.083	5.42372e-12	278.011	6.22331e-13	261.382	7.66127e-11	280.568	1.03399e-12	268.32	1.54327e-12	273.524	7.40442e-13	306.04	2.22008e-12	284.077	1.57962e-12	265.178	2.63667e-11	292.94	1.67209e-11	252.154	8.09223e-12	266.488	2.92955e-12	262.455	2.18115e-11	265.685	3.62335e-12	252.154	8.09223e-12	266.488	2.92955e-12	257.131	1.08162e-11
247.803	2.15865e-11	282.279	1.46685e-12	294.268	1.27966e-12	265.972	4.20945e-12	257.225	6.01934e-11	297.85	1.68136e-12	275.788	4.43797e-12	312.152	1.97853e-12	268.379	6.36179e-12	278.309	7.31539e-13	261.666	8.86787e-11	280.863	1.21471e-12	268.62	1.81421e-12	273.827	8.72987e-13	306.323	2.59396e-12	284.365	1.84401e-12	265.466	3.06593e-11	293.205	1.91921e-11	252.464	9.55742e-12	266.791	3.45e-12	262.744	2.53858e-11	265.972	4.20945e-12	252.464	9.55742e-12	266.791	3.45e-12	257.435	1.27134e-11
248.103	2.52207e-11	282.563	1.70453e-12	294.551	1.49283e-12	266.26	4.88788e-12	257.513	6.97894e-11	298.129	1.91247e-12	276.074	5.15635e-12	312.409	2.27163e-12	268.675	7.45809e-12	278.607	8.59442e-13	261.949	1.02594e-10	281.159	1.42625e-12	268.921	2.13152e-12	274.129	1.02868e-12	306.606	3.02931e-12	284.653	2.15155e-12	265.755	3.56324e-11	293.47	2.20192e-11	252.775	1.12812e-11	267.095	4.06061e-12	263.033	2.95307e-11	266.26	4.88788e-12	252.775	1.12812e-11	267.095	4.06061e-12	257.738	1.49349e-11
248.403	2.94504e-11	282.846	1.97975e-12	294.835	1.74065e-12	266.547	5.67276e-12	257.801	8.08738e-11	298.407	2.17433e-12	276.359	5.988e-12	312.666	2.60716e-12	268.971	8.73861e-12	278.905	1.00916e-12	262.233	1.18635e-10	281.454	1.67372e-12	269.221	2.50295e-12	274.432	1.21145e-12	306.889	3.53598e-12	284.941	2.5091e-12	266.043	4.1391e-11	293.734	2.52519e-11	253.085	1.3308e-11	267.398	4.77658e-12	263.323	3.43348e-11	266.547	5.67276e-12	253.085	1.3308e-11	267.398	4.77658e-12	258.042	1.75345e-11
248.702	3.43704e-11	283.13	2.29826e-12	295.119	2.02861e-12	266.834	6.58033e-12	258.089	9.36708e-11	298.686	2.47091e-12	276.644	6.95031e-12	312.923	2.99111e-12	269.268	1.02335e-11	279.202	1.1843e-12	262.517	1.37116e-10	281.749	1.96308e-12	269.522	2.93745e-12	274.734	1.4259e-12	307.172	4.12536e-12	285.229	2.92457e-12	266.332	4.80555e-11	293.999	2.89467e-11	253.396	1.56896e-11	267.701	5.61562e-12	263.612	3.99001e-11	266.834	6.58033e-12	253.396	1.56896e-11	267.701	5.61562e-12	258.345	2.05751e-11
249.002	4.00902e-11	283.413	2.66671e-12	295.402	2.36303e-12	267.122	7.62921e-12	258.377	1.08437e-10	298.965	2.80665e-12	276.93	8.06321e-12	313.18	3.4303e-12	269.564	1.19776e-11	279.5	1.38909e-12	262.801	1.58397e-10	282.044	2.30124e-12	269.822	3.44548e-12	275.037	1.67736e-12	307.455	4.8106e-12	285.517	3.4071e-12	266.62	5.57646e-11	294.264	3.31678e-11	253.706	1.84863e-11	268.004	6.5983e-12	263.902	4.63438e-11	267.122	7.62921e-12	253.706	1.84863e-11	268.004	6.5983e-12	258.649	2.41291e-11
249.302	4.6736e-11	283.697	3.09269e-12	295.686	2.75122e-12	267.409	8.84079e-12	258.665	1.25468e-10	299.244	3.18654e-12	277.215	9.34964e-12	313.436	3.9325e-12	269.86	1.40115e-11	279.798	1.6284e-12	263.084	1.82892e-10	282.339	2.69619e-12	270.123	4.03911e-12	275.339	1.97205e-12	307.738	5.60689e-12	285.805	3.96722e-12	266.909	6.46771e-11	294.529	3.79882e-11	254.017	2.17688e-11	268.307	7.74855e-12	264.191	5.38008e-11	267.409	8.84079e-12	254.017	2.17688e-11	268.307	7.74855e-12	258.952	2.82811e-11
249.602	5.44532e-11	283.98	3.58495e-12	295.97	3.2016e-12	267.696	1.02396e-11	258.952	1.45098e-10	299.522	3.61619e-12	277.5	1.08359e-11	313.693	4.5065e-12	270.156	1.63818e-11	280.096	1.90789e-12	263.368	2.11069e-10	282.634	3.15724e-12	270.423	4.73239e-12	275.641	2.31721e-12	308.022	6.53177e-12	286.093	4.61706e-12	267.197	7.49757e-11	294.793	4.34903e-11	254.327	2.56188e-11	268.61	9.09417e-12	264.481	6.24257e-11	267.696	1.02396e-11	254.327	2.56188e-11	268.61	9.09417e-12	259.256	3.31287e-11
249.902	6.34096e-11	284.264	4.15351e-12	296.253	3.72386e-12	267.984	1.18536e-11	259.24	1.67715e-10	299.801	4.10187e-12	277.786	1.2552e-11	313.95	5.16234e-12	270.452	1.91429e-11	280.393	2.23414e-12	263.652	2.43467e-10	282.93	3.69515e-12	270.724	5.54158e-12	275.944	2.72125e-12	308.305	7.60547e-12	286.381	5.3706e-12	267.486	8.68695e-11	295.058	4.97681e-11	254.638	3.01318e-11	268.913	1.06674e-11	264.77	7.23964e-11	267.984	1.18536e-11	254.638	3.01318e-11	268.913	1.06674e-11	259.559	3.87853e-11
250.202	7.37983e-11	284.547	4.80987e-12	296.537	4.32917e-12	268.271	1.37151e-11	259.528	1.93758e-10	300.08	4.65065e-12	278.071	1.45327e-11	314.207	5.91138e-12	270.749	2.23574e-11	280.691	2.61474e-12	263.936	2.807e-10	283.225	4.32238e-12	271.025	6.48552e-12	276.246	3.19393e-12	308.588	8.85129e-12	286.669	6.24393e-12	267.774	1.00598e-10	295.323	5.69275e-11	254.948	3.54187e-11	269.216	1.25058e-11	265.059	8.39168e-11	268.271	1.37151e-11	254.948	3.54187e-11	269.216	1.25058e-11	259.863	4.5382e-11
250.502	8.58414e-11	284.831	5.5672e-12	296.821	5.03038e-12	268.558	1.58609e-11	259.816	2.2373e-10	300.359	5.27041e-12	278.356	1.68175e-11	314.464	6.76654e-12	271.045	2.60975e-11	280.989	3.05851e-12	264.219	3.23466e-10	283.52	5.05337e-12	271.325	7.58602e-12	276.549	3.74661e-12	308.871	1.02961e-11	286.957	7.25556e-12	268.063	1.16437e-10	295.588	6.50888e-11	255.259	4.16087e-11	269.519	1.46526e-11	265.349	9.72208e-11	268.558	1.58609e-11	255.259	4.16087e-11	269.519	1.46526e-11	260.166	5.30705e-11
250.801	9.97946e-11	285.114	6.4406e-12	297.105	5.84228e-12	268.845	1.83331e-11	260.104	2.58207e-10	300.637	5.97004e-12	278.642	1.94518e-11	314.72	7.74248e-12	271.341	3.04469e-11	281.287	3.57564e-12	264.503	3.72565e-10	283.815	5.90481e-12	271.626	8.86834e-12	276.851	4.39246e-12	309.154	1.19709e-11	287.245	8.4268e-12	268.351	1.34701e-10	295.852	7.43882e-11	255.569	4.88513e-11	269.823	1.71583e-11	265.638	1.12577e-10	268.845	1.83331e-11	255.569	4.88513e-11	269.823	1.71583e-11	260.47	6.20265e-11
251.101	1.15952e-10	285.398	7.44733e-12	297.388	6.78186e-12	269.133	2.11798e-11	260.392	2.97845e-10	300.916	6.75943e-12	278.927	2.24874e-11	314.977	8.85583e-12	271.637	3.55021e-11	281.584	4.17792e-12	264.787	4.28903e-10	284.11	6.89601e-12	271.926	1.03616e-11	277.154	5.14673e-12	309.437	1.39112e-11	287.533	9.7821e-12	268.64	1.5575e-10	296.117	8.49797e-11	255.88	5.73206e-11	270.126	2.00812e-11	265.928	1.30291e-10	269.133	2.11798e-11	255.88	5.73206e-11	270.126	2.00812e-11	260.773	7.24528e-11
251.401	1.3465e-10	285.681	8.60719e-12	297.672	7.86865e-12	269.42	2.44561e-11	260.68	3.43392e-10	301.195	7.64968e-12	279.212	2.59837e-11	315.234	1.01254e-11	271.934	4.13743e-11	281.882	4.87899e-12	265.07	4.93517e-10	284.406	8.04928e-12	272.227	1.20997e-11	277.456	6.02712e-12	309.72	1.6158e-11	287.821	1.13496e-11	268.928	1.79995e-10	296.382	9.70375e-11	256.19	6.72182e-11	270.429	2.34886e-11	266.217	1.50717e-10	269.42	2.44561e-11	256.19	6.72182e-11	270.429	2.34886e-11	261.077	8.45837e-11
251.701	1.56277e-10	285.965	9.94276e-12	297.956	9.12509e-12	269.707	2.82248e-11	260.968	3.95702e-10	301.474	8.65323e-12	279.497	3.00086e-11	315.491	1.15727e-11	272.23	4.81919e-11	282.18	5.69459e-12	265.354	5.67585e-10	284.701	9.39039e-12	272.527	1.41213e-11	277.759	7.05414e-12	310.003	1.87585e-11	288.109	1.31615e-11	269.217	2.07908e-10	296.647	1.10759e-10	256.501	7.87781e-11	270.732	2.74586e-11	266.507	1.74255e-10	269.707	2.82248e-11	256.501	7.87781e-11	270.732	2.74586e-11	261.38	9.86898e-11
252.001	1.81277e-10	286.248	1.14799e-11	298.239	1.05769e-11	269.995	3.25578e-11	261.256	4.55748e-10	301.752	9.78395e-12	279.783	3.46395e-11	315.748	1.32218e-11	272.526	5.61027e-11	282.478	6.64289e-12	265.638	6.52446e-10	284.996	1.09491e-11	272.828	1.64717e-11	278.061	8.25151e-12	310.286	2.17668e-11	288.397	1.52549e-11	269.506	2.40026e-10	296.911	1.26365e-10	256.811	9.22711e-11	271.035	3.20815e-11	266.796	2.01367e-10	269.995	3.25578e-11	256.811	9.22711e-11	271.035	3.20815e-11	261.684	1.15083e-10
252.301	2.1016e-10	286.531	1.32482e-11	298.523	1.22537e-11	270.282	3.75368e-11	261.544	5.24637e-10	302.031	1.10574e-11	280.068	3.9965e-11	316.004	1.51002e-11	272.822	6.52769e-11	282.775	7.74489e-12	265.922	7.49625e-10	285.291	1.27596e-11	273.128	1.92025e-11	278.364	9.64668e-12	310.569	2.5245e-11	288.685	1.76722e-11	269.794	2.76964e-10	297.176	1.44109e-10	257.122	1.08011e-10	271.338	3.74614e-11	267.085	2.32579e-10	270.282	3.75368e-11	257.122	1.08011e-10	271.338	3.74614e-11	261.987	1.34124e-10
252.601	2.4351e-10	286.815	1.52812e-11	298.807	1.41892e-11	270.569	4.32553e-11	261.832	6.03632e-10	302.31	1.24908e-11	280.353	4.60861e-11	316.261	1.7239e-11	273.119	7.59104e-11	283.073	9.02476e-12	266.205	8.60853e-10	285.586	1.48616e-11	273.429	2.23735e-11	278.666	1.12714e-11	310.852	2.92646e-11	288.973	2.04621e-11	270.083	3.19422e-10	297.441	1.64274e-10	257.433	1.26361e-10	271.641	4.37188e-11	267.375	2.68492e-10	270.569	4.32553e-11	257.433	1.26361e-10	271.641	4.37188e-11	262.291	1.56226e-10
252.9	2.81996e-10	287.098	1.76176e-11	299.09	1.64223e-11	270.857	4.98196e-11	262.12	6.94165e-10	302.589	1.41037e-11	280.639	5.31181e-11	316.518	1.96733e-11	273.415	8.82286e-11	283.371	1.05104e-11	266.489	9.88096e-10	285.881	1.73005e-11	273.729	2.60538e-11	278.969	1.31623e-11	311.135	3.39076e-11	289.261	2.36804e-11	270.371	3.682e-10	297.706	1.8718e-10	257.743	1.4774e-10	271.944	5.09926e-11	267.664	3.09791e-10	270.857	4.98196e-11	257.743	1.4774e-10	271.944	5.09926e-11	262.594	1.81867e-10
253.2	3.26384e-10	287.382	2.03012e-11	299.374	1.89975e-11	271.144	5.73509e-11	262.408	7.97869e-10	302.867	1.59175e-11	280.924	6.11924e-11	316.775	2.24428e-11	273.711	1.02491e-10	283.669	1.22339e-11	266.773	1.13359e-09	286.177	2.01289e-11	274.03	3.03225e-11	279.271	1.53618e-11	311.418	3.92677e-11	289.549	2.73908e-11	270.66	4.2421e-10	297.97	2.13189e-10	258.054	1.72634e-10	272.247	5.94428e-11	267.954	3.57262e-10	271.144	5.73509e-11	258.054	1.72634e-10	272.247	5.94428e-11	262.898	2.11596e-10
253.5	3.7755e-10	287.665	2.3382e-11	299.658	2.19656e-11	271.431	6.59872e-11	262.696	9.16598e-10	303.146	1.79564e-11	281.209	7.04587e-11	317.032	2.55925e-11	274.007	1.18994e-10	283.966	1.42323e-11	267.056	1.29986e-09	286.472	2.34072e-11	274.33	3.5271e-11	279.573	1.79187e-11	311.701	4.54528e-11	289.837	3.16664e-11	270.948	4.88489e-10	298.235	2.42707e-10	258.364	2.01603e-10	272.551	6.92542e-11	268.243	4.11797e-10	271.431	6.59872e-11	258.364	2.01603e-10	272.551	6.92542e-11	263.201	2.46047e-10
253.8	4.36495e-10	287.949	2.6917e-11	299.941	2.53849e-11	271.718	7.58854e-11	262.983	1.05246e-09	303.425	2.02473e-11	281.495	8.10875e-11	317.288	2.91733e-11	274.303	1.3808e-10	284.264	1.6548e-11	267.34	1.48978e-09	286.767	2.72048e-11	274.631	4.10043e-11	279.876	2.08895e-11	311.985	5.25863e-11	290.125	3.65907e-11	271.237	5.62219e-10	298.5	2.76193e-10	258.675	2.35294e-10	272.854	8.06394e-11	268.533	4.74415e-10	271.718	7.58854e-11	258.675	2.35294e-10	272.854	8.06394e-11	263.505	2.85944e-10
254.1	5.04364e-10	288.232	3.09711e-11	300.225	2.9322e-11	272.006	8.7224e-11	263.271	1.20784e-09	303.704	2.28201e-11	281.78	9.32729e-11	317.545	3.32425e-11	274.6	1.60142e-10	284.562	1.92301e-11	267.624	1.70661e-09	287.062	3.16015e-11	274.931	4.7643e-11	280.178	2.43391e-11	312.268	6.08092e-11	290.413	4.22592e-11	271.525	6.46747e-10	298.765	3.14164e-10	258.985	2.74451e-10	273.157	9.3843e-11	268.822	5.46275e-10	272.006	8.7224e-11	258.985	2.74451e-10	273.157	9.3843e-11	263.808	3.32122e-10
254.4	5.82462e-10	288.516	3.56183e-11	300.509	3.38529e-11	272.293	1.00206e-10	263.559	1.38545e-09		2.57081e-11	282.065	1.07236e-10	317.802	3.78651e-11	274.896	1.85628e-10	284.86	2.23346e-11	267.908	1.95403e-09	287.357	3.66892e-11	275.232	5.53257e-11	280.481	2.83423e-11	312.551	7.02833e-11	290.701	4.87809e-11	271.814	7.43601e-10	299.029	3.57202e-10	259.296	3.19934e-10	273.46	1.09147e-10	269.111	6.287e-10	272.293	1.00206e-10	259.296	3.19934e-10	273.46	1.09147e-10	264.112	3.85539e-10
254.7	6.72281e-10	288.799	4.09427e-11	300.793	3.90646e-11	272.58	1.15061e-10	263.847	1.58836e-09	304.261	2.89484e-11	282.35	1.23227e-10	318.059	4.31141e-11	275.192	2.15055e-10	285.157	2.59261e-11	268.191	2.23621e-09	287.652	4.2573e-11	275.533	6.42115e-11	280.783	3.29853e-11	312.834	8.11935e-11	290.989	5.62803e-11	272.102	8.54521e-10	299.294	4.05962e-10	259.606	3.72734e-10	273.763	1.26875e-10	269.401	7.23194e-10	272.58	1.15061e-10	259.606	3.72734e-10	273.763	1.26875e-10	264.415	4.47294e-10
254.999	7.75522e-10	289.083	4.70397e-11	301.076	4.50563e-11	272.868	1.32052e-10	264.135	1.82007e-09	304.54	3.25825e-11	282.636	1.41532e-10	318.316	4.90723e-11	275.488	2.49012e-10	285.455	3.00788e-11	268.475	2.55789e-09	287.948	4.9374e-11	275.833	7.4483e-11	281.086	3.83674e-11	313.117	9.3751e-11	291.276	6.48994e-11	272.391	9.81483e-10	299.559	4.61179e-10	259.917	4.3399e-10	274.066	1.47398e-10	269.69	8.31466e-10	272.868	1.32052e-10	259.917	4.3399e-10	274.066	1.47398e-10	264.719	5.18647e-10
255.299	8.94122e-10	289.366	5.40179e-11	301.36	5.19413e-11	273.155	1.51474e-10	264.423	2.08451e-09	304.819	3.66561e-11	282.921	1.62474e-10	318.572	5.58329e-11	275.785	2.88177e-10	285.753	3.48776e-11	268.759	2.92439e-09	288.243	5.72308e-11	276.134	8.63495e-11	281.388	4.46025e-11	313.4	1.08197e-10	291.564	7.48003e-11	272.679	1.12673e-09	299.824	5.23681e-10	260.227	5.05012e-10	274.369	1.71145e-10	269.98	9.55461e-10	273.155	1.51474e-10	260.227	5.05012e-10	274.369	1.71145e-10	265.022	6.01042e-10
255.599	1.03029e-09	289.65	6.20008e-11	301.644	5.98488e-11	273.442	1.73664e-10	264.711	2.38615e-09	305.097	4.12204e-11	283.206	1.86421e-10	318.829	6.35009e-11	276.081	3.33322e-10	286.051	4.04198e-11	269.042	3.34175e-09	288.538	6.63021e-11	276.434	1.00051e-10	281.691	5.18216e-11	313.683	1.24808e-10	291.852	8.61676e-11	272.968	1.29281e-09	300.088	5.94398e-10	260.538	5.87308e-10	274.672	1.98605e-10	270.269	1.09739e-09	273.442	1.73664e-10	260.538	5.87308e-10	274.672	1.98605e-10	265.326	6.96132e-10
255.899	1.18653e-09	289.933	7.11283e-11	301.927	6.89261e-11	273.73	1.99005e-10	264.999	2.73005e-09	305.376	4.63321e-11	283.492	2.13792e-10	319.086	7.21949e-11	276.377	3.85331e-10	286.348	4.68172e-11	269.326	3.81679e-09	288.833	7.67702e-11	276.735	1.15862e-10	281.993	6.01752e-11	313.966	1.43899e-10	292.14	9.92117e-11	273.256	1.48261e-09	300.353	6.74375e-10	260.848	6.82609e-10	274.975	2.3034e-10	270.559	1.25976e-09	273.73	1.99005e-10	260.848	6.82609e-10	274.975	2.3034e-10	265.629	8.05809e-10
256.199	1.36572e-09	290.217	8.15592e-11	302.211	7.93407e-11	274.017	2.27927e-10	265.287	3.12192e-09	305.655	5.20541e-11	283.777	2.45057e-10	319.343	8.20482e-11	276.673	4.45216e-10	286.646	5.41975e-11	269.61	4.35721e-09	289.128	8.88433e-11	277.035	1.34097e-10	282.296	6.9836e-11	314.249	1.65827e-10	292.428	1.14172e-10	273.545	1.6994e-09	300.618	7.64784e-10	261.159	7.92904e-10	275.279	2.66995e-10	270.848	1.44541e-09	274.017	2.27927e-10	261.159	7.92904e-10	275.279	2.66995e-10	265.933	9.32239e-10
256.499	1.57109e-09	290.5	9.34737e-11	302.495	9.12839e-11	274.304	2.60919e-10	265.575	3.56821e-09	305.933	5.84566e-11	284.062	2.80754e-10	319.6	9.32112e-11	276.97	5.14131e-10	286.944	6.2707e-11	269.894	4.97169e-09	289.424	1.0276e-10	277.336	1.55115e-10	282.598	8.10022e-11	314.532	1.91003e-10	292.716	1.31321e-10	273.833	1.94689e-09	300.883	8.66942e-10	261.469	9.20473e-10	275.582	3.09308e-10	271.137	1.65758e-09	274.304	2.60919e-10	261.469	9.20473e-10	275.582	3.09308e-10	266.236	1.07789e-09
256.799	1.80635e-09	290.784	1.07076e-10	302.778	1.04973e-10	274.591	2.98535e-10	265.863	4.07622e-09	306.212	6.56169e-11	284.348	3.2149e-10	319.857	1.05853e-10	277.266	5.93394e-10	287.242	7.25129e-11	270.177	5.67002e-09	289.719	1.18793e-10	277.636	1.79328e-10	282.901	9.39009e-11	314.815	2.19893e-10	293.004	1.50969e-10	274.122	2.22928e-09	301.147	9.82323e-10	261.78	1.06793e-09	275.885	3.58125e-10	271.427	1.89993e-09	274.591	2.98535e-10	261.78	1.06793e-09	275.885	3.58125e-10	266.54	1.2456e-09
257.098	2.07568e-09	291.067	1.22597e-10	303.062	1.20655e-10	274.879	3.41401e-10	266.151	4.65418e-09	306.491	7.36213e-11	284.633	3.67952e-10	320.113	1.20164e-10	277.562	6.84508e-10	287.539	8.38065e-11	270.461	6.46325e-09	290.014	1.37254e-10	277.937	2.07205e-10	283.203	1.08792e-10	315.098	2.53027e-10	293.292	1.73468e-10	274.41	2.55133e-09	301.412	1.11258e-09	262.09	1.23828e-09	276.188	4.1441e-10	271.716	2.1766e-09	274.879	3.41401e-10	262.09	1.23828e-09	276.188	4.1441e-10	266.843	1.43859e-09
257.398	2.38386e-09	291.351	1.40298e-10	303.346	1.38611e-10	275.166	3.90223e-10	266.439	5.31137e-09	306.77	8.25649e-11	284.918	4.20917e-10	320.37	1.36359e-10	277.858	7.89187e-10	287.837	9.68061e-11	270.745	7.36382e-09	290.309	1.58498e-10	278.237	2.39283e-10	283.505	1.25974e-10	315.381	2.91012e-10	293.58	1.99218e-10	274.699	2.9184e-09	301.677	1.25957e-09	262.401	1.43494e-09	276.491	4.79271e-10	272.006	2.4923e-09	275.166	3.90223e-10	262.401	1.43494e-09	276.491	4.79271e-10	267.147	1.66053e-09
257.698	2.73627e-09	291.634	1.60477e-10	303.63	1.59161e-10	275.453	4.458e-10	266.726	6.05826e-09	307.048	9.25536e-11	285.204	4.81265e-10	320.627	1.54678e-10	278.154	9.09385e-10	288.135	1.11761e-10	271.029	8.38572e-09	290.604	1.82933e-10	278.538	2.76173e-10	283.808	1.45787e-10	315.665	3.34533e-10	293.868	2.28673e-10	274.987	3.33656e-09	301.942	1.42537e-09	262.711	1.66185e-09	276.794	5.5397e-10	272.295	2.85232e-09	275.453	4.458e-10	262.711	1.66185e-09	276.794	5.5397e-10	267.45	1.91563e-09
257.998	3.13905e-09	291.918	1.83467e-10	303.913	1.82666e-10	275.741	5.09034e-10	267.014	6.90665e-09	307.327	1.03704e-10	285.489	5.49989e-10	320.884	1.75393e-10	278.451	1.04733e-09	288.433	1.28956e-10	271.312	9.54472e-09	290.899	2.11021e-10	278.838	3.18573e-10	284.11	1.68621e-10	315.948	3.84374e-10	294.156	2.6235e-10	275.276	3.8127e-09	302.206	1.6123e-09	263.022	1.9235e-09	277.097	6.39949e-10	272.585	3.2627e-09	275.741	5.09034e-10	263.022	1.9235e-09	277.097	6.39949e-10	267.754	2.20867e-09
258.298	3.59911e-09	292.201	2.09647e-10	304.197	2.0954e-10	276.028	5.80941e-10	267.302	7.86983e-09	307.606	1.16146e-10	285.774	6.28212e-10	321.141	1.98807e-10	278.747	1.20554e-09	288.73	1.48715e-10	271.596	1.08585e-08	291.195	2.43292e-10	279.139	3.67278e-10	284.413	1.94922e-10	316.231	4.41423e-10	294.444	3.00832e-10	275.565	4.35454e-09	302.471	1.82296e-09	263.332	2.22502e-09	277.4	7.38854e-10	272.874	3.73022e-09	276.028	5.80941e-10	263.332	2.22502e-09	277.4	7.38854e-10	268.057	2.5451e-09
258.598	4.12432e-09	292.484	2.39444e-10	304.481	2.40248e-10	276.315	6.62669e-10	267.59	8.96276e-09	307.885	1.30023e-10	286.059	7.17201e-10	321.397	2.25261e-10	279.043	1.38691e-09	289.028	1.71408e-10	271.88	1.23471e-08	291.49	2.80347e-10	279.44	4.23194e-10	284.715	2.25198e-10	316.514	5.0669e-10	294.732	3.44783e-10	275.853	4.97083e-09	302.736	2.06026e-09	263.643	2.57228e-09	277.703	8.52562e-10	273.163	4.26256e-09	276.315	6.62669e-10	263.643	2.57228e-09	277.703	8.52562e-10	268.361	2.93111e-09
258.898	4.72356e-09	292.768	2.73342e-10	304.764	2.75321e-10	276.603	7.55511e-10	267.878	1.02022e-08	308.163	1.45493e-10	286.345	8.18384e-10	321.654	2.5514e-10	279.339	1.59471e-09	289.326	1.97455e-10	272.163	1.40328e-08	291.785	3.22873e-10	279.74	4.87351e-10	285.018	2.6003e-10	316.797	5.8132e-10	295.02	3.94953e-10	276.142	5.67144e-09	303.001	2.32744e-09	263.953	2.97197e-09	278.007	9.83212e-10	273.453	4.86839e-09	276.603	7.55511e-10	263.953	2.97197e-09	278.007	9.83212e-10	268.664	3.37375e-09
259.197	5.40687e-09	293.051	3.11885e-10	305.048	3.15357e-10	276.89	8.60922e-10	268.166	1.16072e-08	308.442	1.6273e-10	286.63	9.33374e-10	321.911	2.88873e-10	279.636	1.83266e-09	289.624	2.27337e-10	272.447	1.59408e-08	292.08	3.71651e-10	280.041	5.60922e-10	285.32	3.00081e-10	317.08	6.66614e-10	295.308	4.52192e-10	276.43	6.46748e-09	303.265	2.62815e-09	264.264	3.43172e-09	278.31	1.13324e-09	273.742	5.5575e-09	276.89	8.60922e-10	264.264	3.43172e-09	278.31	1.13324e-09	268.968	3.88104e-09
259.497	6.18561e-09	293.335	3.55687e-10	305.332	3.61036e-10	277.177	9.80541e-10	268.454	1.31989e-08	308.721	1.81929e-10	286.915	1.06399e-09	322.168	3.26944e-10	279.932	2.10497e-09	289.921	2.61598e-10	272.731	1.80992e-08	292.375	4.27568e-10	280.341	6.45241e-10	285.623	3.46105e-10	317.363	7.64047e-10	295.596	5.17462e-10	276.719	7.37146e-09	303.53	2.96644e-09	264.575	3.96025e-09	278.613	1.30543e-09	274.032	6.34093e-09	277.177	9.80541e-10	264.575	3.96025e-09	278.613	1.30543e-09	269.271	4.46209e-09
259.797	7.07258e-09	293.618	4.05441e-10	305.615	4.13127e-10	277.464	1.11621e-09	268.742	1.50013e-08	309	2.03303e-10	287.201	1.21227e-09	322.425	3.69892e-10	280.228	2.41645e-09	290.219	3.00858e-10	273.015	2.05398e-08	292.67	4.91634e-10	280.642	7.41821e-10	285.925	3.98962e-10	317.646	8.75289e-10	295.884	5.91851e-10	277.007	8.3975e-09	303.795	3.34684e-09	264.885	4.56746e-09	278.916	1.50292e-09	274.321	7.23111e-09	277.464	1.11621e-09	264.885	4.56746e-09	278.916	1.50292e-09	269.575	5.12722e-09
260.097	8.08227e-09	293.902	4.61926e-10	305.899	4.72501e-10	277.752	1.27001e-09	269.03	1.7041e-08	309.278	2.27087e-10	287.486	1.38053e-09	322.681	4.18326e-10	280.524	2.77253e-09	290.517	3.45821e-10	273.298	2.32979e-08	292.966	5.64996e-10	280.942	8.52383e-10	286.228	4.59634e-10	317.929	1.00223e-09	296.172	6.76588e-10	277.296	9.56144e-09	304.06	3.77438e-09	265.196	5.26464e-09	279.219	1.72932e-09	274.611	8.24207e-09	277.752	1.27001e-09	265.196	5.26464e-09	279.219	1.72932e-09	269.878	5.88816e-09
260.397	9.23098e-09	294.185	5.26022e-10	306.183	5.4014e-10	278.039	1.44427e-09	269.318	1.93482e-08	309.557	2.53542e-10	287.771	1.57135e-09	322.938	4.72924e-10	280.82	3.17936e-09	290.815	3.97287e-10	273.582	2.64134e-08	293.261	6.48958e-10	281.243	9.78879e-10	286.53	5.29233e-10	318.212	1.14703e-09	296.46	7.73062e-10	277.584	1.08811e-08	304.324	4.25472e-09	265.506	6.06464e-09	279.522	1.98869e-09	274.9	9.3896e-09	278.039	1.44427e-09	265.506	6.06464e-09	279.522	1.98869e-09	270.182	6.75822e-09
260.697	1.05371e-08	294.469	5.98715e-10	306.466	6.17156e-10	278.326	1.6416e-09	269.606	2.19565e-08	309.836	2.82953e-10	288.057	1.78765e-09	323.195	5.34447e-10	281.117	3.64393e-09	291.112	4.56163e-10	273.866	2.99307e-08	293.556	7.44997e-10	281.543	1.12352e-09	286.833	6.09028e-10	318.495	1.31209e-09	296.748	8.82841e-10	277.873	1.23766e-08	304.589	4.79413e-09	265.817	6.98205e-09	279.825	2.28567e-09	275.189	1.06914e-08	278.326	1.6416e-09	265.817	6.98205e-09	279.825	2.28567e-09	270.485	7.75244e-09
260.997	1.20214e-08	294.752	6.81119e-10	306.75	7.04804e-10	278.614	1.86494e-09	269.894	2.49037e-08	310.115	3.15636e-10	288.342	2.0327e-09	323.452	6.03747e-10	281.413	4.17413e-09	291.41	5.23477e-10	274.149	3.38996e-08	293.851	8.54791e-10	281.844	1.28882e-09	287.135	7.00459e-10	318.778	1.50017e-09	297.036	1.00769e-09	278.161	1.40704e-08	304.854	5.39961e-09	266.127	8.03347e-09	280.128	2.62551e-09	275.479	1.21676e-08	278.614	1.86494e-09	266.127	8.03347e-09	280.128	2.62551e-09	270.789	8.88789e-09
261.297	1.37072e-08	295.036	7.74482e-10	307.034	8.04502e-10	278.901	2.11759e-09	270.182	2.82322e-08	310.393	3.51939e-10	288.627	2.31019e-09	323.709	6.81777e-10	281.709	4.77891e-09	291.708	6.00397e-10	274.433	3.83759e-08	294.146	9.80239e-10	282.144	1.47762e-09	287.437	8.05163e-10	319.061	1.71436e-09	297.324	1.14962e-09	278.45	1.59878e-08	305.119	6.07894e-09	266.438	9.23772e-09	280.431	3.01418e-09	275.768	1.38405e-08	278.901	2.11759e-09	266.438	9.23772e-09	280.431	3.01418e-09	271.092	1.01839e-08
261.596	1.56208e-08	295.319	8.80208e-10	307.318	9.17849e-10	279.188	2.40324e-09	270.47	3.19891e-08	310.672	3.92244e-10	288.913	2.62425e-09	323.965	7.69602e-10	282.005	5.46837e-09	292.006	6.88244e-10	274.717	4.34218e-08	294.441	1.1235e-09	282.445	1.69312e-09	287.74	9.24995e-10	319.344	1.95817e-09	297.612	1.31086e-09	278.738	1.81572e-08	305.383	6.84081e-09	266.748	1.06162e-08	280.735	3.45842e-09	276.058	1.57355e-08	279.188	2.40324e-09	266.748	1.06162e-08	280.735	3.45842e-09	271.396	1.16623e-08
261.896	1.77917e-08	295.603	9.99874e-10	307.601	1.04665e-09	279.476	2.72604e-09	270.757	3.62275e-08	310.951	4.36974e-10	289.198	2.9795e-09	324.222	8.68416e-10	282.302	6.25393e-09	292.303	7.88513e-10	275.001	4.91069e-08	294.737	1.287e-09	282.745	1.93899e-09	288.042	1.06206e-09	319.628	2.23555e-09	297.9	1.49395e-09	279.027	2.06104e-08	305.648	7.69485e-09	267.059	1.21931e-08	281.038	3.96589e-09	276.347	1.78807e-08	279.476	2.72604e-09	267.059	1.21931e-08	281.038	3.96589e-09	271.699	1.33477e-08
262.196	2.0253e-08	295.886	1.13525e-09	307.885	1.19293e-09	279.763	3.09063e-09	271.045	4.10064e-08	311.23	4.8659e-10	289.483	3.38114e-09	324.479	9.79549e-10	282.598	7.1485e-09	292.601	9.02897e-10	275.284	5.55089e-08	295.032	1.4735e-09	283.046	2.21931e-09	288.345	1.21876e-09	319.911	2.55097e-09	298.188	1.70174e-09	279.315	2.3383e-08	305.913	8.65179e-09	267.369	1.3996e-08	281.341	4.54525e-09	276.637	2.03082e-08	279.763	3.09063e-09	267.369	1.3996e-08	281.341	4.54525e-09	272.003	1.5268e-08
262.496	2.3042e-08	296.17	1.28832e-09	308.169	1.35898e-09	280.05	3.5022e-09	271.333	4.63921e-08	311.508	5.41603e-10	289.768	3.83501e-09	324.736	1.10449e-09	282.894	8.16662e-09	292.899	1.03331e-09	275.568	6.27145e-08	295.327	1.68613e-09	283.346	2.53876e-09	288.647	1.39778e-09	320.194	2.90947e-09	298.476	1.93745e-09	279.604	2.6515e-08	306.178	9.72357e-09	267.68	1.60558e-08	281.644	5.2063e-09	276.926	2.30534e-08	280.05	3.5022e-09	267.68	1.60558e-08	281.644	5.2063e-09	272.306	1.74548e-08
262.796	2.62007e-08	296.453	1.4613e-09	308.452	1.54738e-09	280.337	3.96656e-09	271.621	5.24584e-08	311.787	6.02572e-10	290.054	4.34762e-09	324.993	1.2449e-09	283.19	9.32473e-09	293.197	1.18191e-09	275.852	7.08206e-08	295.622	1.92841e-09	283.647	2.90256e-09	288.95	1.60219e-09	320.477	3.31671e-09	298.764	2.20468e-09	279.892	3.0051e-08	306.442	1.09234e-08	267.99	1.84079e-08	281.947	5.96011e-09	277.215	2.61565e-08	280.337	3.96656e-09	267.99	1.84079e-08	281.947	5.96011e-09	272.61	1.99435e-08
263.096	2.97758e-08	296.737	1.6567e-09	308.736	1.76103e-09	280.625	4.4902e-09	271.909	5.92876e-08	312.066	6.70111e-10	290.339	4.92627e-09	325.249	1.40263e-09	283.487	1.06413e-08	293.495	1.35115e-09	276.135	7.9935e-08	295.917	2.20431e-09	283.948	3.31666e-09	289.252	1.83547e-09	320.76	3.77909e-09	299.052	2.50748e-09	280.181	3.40413e-08	306.707	1.22661e-08	268.301	2.10921e-08	282.25	6.81921e-09	277.505	2.96621e-08	280.625	4.4902e-09	268.301	2.10921e-08	282.25	6.81921e-09	272.913	2.27741e-08
263.396	3.38201e-08	297.02	1.87729e-09	309.02	2.00318e-09	280.912	5.08039e-09	272.197	6.69715e-08	312.345	7.44896e-10	290.624	5.57915e-09	325.506	1.57976e-09	283.783	1.21373e-08	293.792	1.54377e-09	276.419	9.01778e-08	296.213	2.51834e-09	284.248	3.78772e-09	289.555	2.10152e-09	321.043	4.30381e-09	299.34	2.85042e-09	280.469	3.85415e-08	306.972	1.37678e-08	268.611	2.41532e-08	282.553	7.79772e-09	277.794	3.36205e-08	280.912	5.08039e-09	268.611	2.41532e-08	282.553	7.79772e-09	273.217	2.59918e-08
263.695	3.83925e-08	297.304	2.12621e-09	309.303	2.27751e-09	281.199	5.74523e-09	272.485	7.56128e-08	312.623	8.27666e-10	290.91	6.31538e-09	325.763	1.77859e-09	284.079	1.38361e-08	294.09	1.76289e-09	276.703	1.01683e-07	296.508	2.87557e-09	284.549	4.32328e-09	289.857	2.40479e-09	321.326	4.89898e-09	299.628	3.2386e-09	280.758	4.36143e-08	307.237	1.54468e-08	268.922	2.76422e-08	282.856	8.9116e-09	278.084	3.80878e-08	281.199	5.74523e-09	268.922	2.76422e-08	282.856	8.9116e-09	273.52	2.96473e-08
263.995	4.35588e-08	297.587	2.40695e-09	309.587	2.58812e-09	281.487	6.49377e-09	272.773	8.53254e-08	312.902	9.19234e-10	291.195	7.14518e-09	326.02	2.00169e-09	284.375	1.57643e-08	294.388	2.01202e-09	276.987	1.14599e-07	296.803	3.2817e-09	284.849	4.93183e-09	290.16	2.75026e-09	321.609	5.57371e-09	299.916	3.67777e-09	281.047	4.93295e-08	307.501	1.73231e-08	269.232	3.16164e-08	283.159	1.01788e-08	278.373	4.31268e-08	281.487	6.49377e-09	269.232	3.16164e-08	283.159	1.01788e-08	273.824	3.37978e-08
264.295	4.93931e-08	297.871	2.72341e-09	309.871	2.93964e-09	281.774	7.3361e-09	273.061	9.62365e-08	313.181	1.02049e-09	291.48	8.07996e-09	326.277	2.25193e-09	284.671	1.79514e-08	294.686	2.29509e-09	277.27	1.29093e-07	297.098	3.74319e-09	285.15	5.6229e-09	290.462	3.1436e-09	321.892	6.33826e-09	300.204	4.17436e-09	281.335	5.5765e-08	307.766	1.9419e-08	269.543	3.61406e-08	283.463	1.16197e-08	278.663	4.88076e-08	281.774	7.3361e-09	269.543	3.61406e-08	283.463	1.16197e-08	274.127	3.85075e-08
264.595	5.59779e-08	298.154	3.07997e-09	310.155	3.33725e-09	282.061	8.28349e-09	273.349	1.08487e-07	313.46	1.13241e-09	291.766	9.13245e-09	326.533	2.5325e-09	284.968	2.0431e-08	294.983	2.61657e-09	277.554	1.45347e-07	297.393	4.26729e-09	285.45	6.40723e-09	290.765	3.59117e-09	322.175	7.20413e-09	300.492	4.73557e-09	281.624	6.30077e-08	308.031	2.17591e-08	269.853	4.12875e-08	283.766	1.3257e-08	278.952	5.52086e-08	282.061	8.28349e-09	269.853	4.12875e-08	283.766	1.3257e-08	274.431	4.38488e-08
264.895	6.34053e-08	298.437	3.48148e-09	310.438	3.78676e-09	282.349	9.34846e-09	273.637	1.22235e-07	313.738	1.25606e-09	292.051	1.03169e-08	326.79	2.84697e-09	285.264	2.32406e-08	295.281	2.98144e-09	277.838	1.63567e-07	297.688	4.86215e-09	285.751	7.29692e-09	291.067	4.10014e-09	322.458	8.18427e-09	300.78	5.3695e-09	281.912	7.11546e-08	308.296	2.43708e-08	270.164	4.71395e-08	284.069	1.51164e-08	279.241	6.24174e-08	282.349	9.34846e-09	270.164	4.71395e-08	284.069	1.51164e-08	274.734	4.99027e-08
265.195	7.17786e-08	298.721	3.9334e-09	310.722	4.2947e-09	282.636	1.0545e-08	273.925	1.37655e-07	314.017	1.39261e-09	292.336	1.1649e-08	327.047	3.19929e-09	285.56	2.64224e-08	295.579	3.39534e-09	278.122	1.83981e-07	297.984	5.53698e-09	286.051	8.30552e-09	291.369	4.67861e-09	322.741	9.29318e-09	301.068	6.08518e-09	282.201	8.03137e-08	308.56	2.72841e-08	270.474	5.37889e-08	284.372	1.72269e-08	279.531	7.05316e-08	282.636	1.0545e-08	270.474	5.37889e-08	284.372	1.72269e-08	275.038	5.67603e-08
265.495	8.12127e-08	299.004	4.44179e-09	311.006	4.86835e-09	282.923	1.18886e-08	274.213	1.54941e-07	314.296	1.54334e-09	292.621	1.31466e-08	327.304	3.59386e-09	285.856	3.00235e-08	295.877	3.86458e-09	278.405	2.0684e-07	298.279	6.30208e-09	286.352	9.44827e-09	291.672	5.33569e-09	323.024	1.05472e-08	301.356	6.89272e-09	282.489	9.06053e-08	308.825	3.05327e-08	270.785	6.13398e-08	284.675	1.9621e-08	279.82	7.96603e-08	282.923	1.18886e-08	270.785	6.13398e-08	284.675	1.9621e-08	275.341	6.45238e-08
265.794	9.18359e-08	299.288	5.01342e-09	311.289	5.51591e-09	283.21	1.33966e-08	274.5	1.74309e-07	314.575	1.70965e-09	292.907	1.48293e-08	327.561	4.03558e-09	286.153	3.40971e-08	296.174	4.39628e-09	278.689	2.32425e-07	298.574	7.16905e-09	286.652	1.07423e-08	291.974	6.08163e-09	323.308	1.19645e-08	301.644	7.80344e-09	282.778	1.02163e-07	309.09	3.41534e-08	271.095	6.99092e-08	284.978	2.23351e-08	280.11	8.99247e-08	283.21	1.33966e-08	271.095	6.99092e-08	284.978	2.23351e-08	275.645	7.33077e-08
266.094	1.03791e-07	299.571	5.65582e-09	311.573	6.2465e-09	283.498	1.50883e-08	274.788	1.95997e-07	314.853	1.89307e-09	293.192	1.6719e-08	327.817	4.52989e-09	286.449	3.87026e-08	296.472	4.99839e-09	278.973	2.61045e-07	298.869	8.15092e-09	286.953	1.22067e-08	292.277	6.92793e-09	323.591	1.35655e-08	301.932	8.82998e-09	283.066	1.15137e-07	309.355	3.8187e-08	271.406	7.96284e-08	285.281	2.54102e-08	280.399	1.0146e-07	283.498	1.50883e-08	271.406	7.96284e-08	285.281	2.54102e-08	275.948	8.32403e-08
266.394	1.17238e-07	299.855	6.3774e-09	311.857	7.07036e-09	283.785	1.69849e-08	275.076	2.20271e-07	315.132	2.09527e-09	293.477	1.884e-08	328.074	5.08285e-09	286.745	4.39065e-08	296.77	5.67987e-09	279.256	2.93045e-07	299.164	9.2623e-09	287.253	1.38631e-08	292.579	7.88757e-09	323.874	1.53733e-08	302.22	9.98645e-09	283.355	1.29691e-07	309.619	4.26787e-08	271.716	9.0645e-08	285.584	2.88924e-08	280.689	1.14417e-07	283.785	1.69849e-08	271.716	9.0645e-08	285.584	2.88924e-08	276.252	9.44653e-08
266.694	1.32354e-07	300.138	7.18748e-09	312.14	7.99892e-09	284.072	1.91102e-08	275.364	2.47426e-07	315.411	2.31807e-09	293.763	2.12195e-08	328.331	5.70117e-09	287.041	4.97833e-08	297.068	6.45074e-09	279.54	3.28806e-07	299.459	1.05196e-08	287.554	1.57354e-08	292.882	8.97507e-09	324.157	1.74135e-08	302.508	1.12886e-08	283.643	1.4601e-07	309.884	4.76783e-08	272.027	1.03124e-07	285.887	3.28332e-08	280.978	1.28964e-07	284.072	1.91102e-08	272.027	1.03124e-07	285.887	3.28332e-08	276.555	1.07143e-07
266.994	1.49336e-07	300.422	8.09648e-09	312.424	9.04495e-09	284.36	2.14905e-08	275.652	2.77785e-07	315.689	2.56348e-09	294.048	2.38875e-08	328.588	6.39231e-09	287.338	5.64163e-08	297.365	7.32222e-09	279.824	3.68748e-07	299.755	1.19411e-08	287.854	1.78507e-08	293.184	1.02067e-08	324.44	1.97146e-08	302.796	1.27541e-08	283.932	1.64298e-07	310.149	5.32406e-08	272.338	1.17252e-07	286.191	3.72904e-08	281.268	1.45286e-07	284.36	2.14905e-08	272.338	1.17252e-07	286.191	3.72904e-08	276.859	1.21454e-07
267.294	1.68404e-07	300.705	9.11594e-09	312.708	1.02227e-08	284.647	2.41549e-08	275.94	3.11711e-07	315.968	2.83365e-09	294.333	2.68775e-08	328.845	7.16456e-09	287.634	6.38987e-08	297.663	8.30691e-09	280.108	4.13338e-07	300.05	1.35475e-08	288.155	2.02391e-08	293.487	1.16009e-08	324.723	2.2309e-08	303.084	1.44024e-08	284.22	1.84782e-07	310.414	5.94264e-08	272.648	1.33237e-07	286.494	4.23287e-08	281.557	1.6359e-07	284.647	2.41549e-08	272.648	1.33237e-07	286.494	4.23287e-08	277.162	1.37599e-07
267.594	1.89801e-07	300.989	1.02587e-08	312.991	1.15481e-08	284.934	2.7136e-08	276.228	3.49602e-07	316.247	3.13098e-09	294.619	3.02266e-08	329.101	8.0271e-09	287.93	7.23345e-08	297.961	9.41886e-09	280.391	4.63092e-07	300.345	1.53617e-08	288.456	2.29342e-08	293.789	1.31781e-08	325.006	2.52323e-08	303.372	1.62554e-08	284.509	2.07713e-07	310.678	6.63024e-08	272.959	1.5131e-07	286.797	4.80205e-08	281.846	1.84107e-07	284.934	2.7136e-08	272.959	1.5131e-07	286.797	4.80205e-08	277.466	1.55802e-07
267.893	2.13799e-07	301.272	1.1539e-08	313.275	1.30389e-08	285.222	3.04694e-08	276.516	3.91898e-07	316.526	3.45803e-09	294.904	3.39759e-08	329.358	8.9901e-09	288.226	8.184e-08	298.259	1.06738e-08	280.675	5.18579e-07	300.64	1.74095e-08	288.756	2.59739e-08	294.092	1.49612e-08	325.289	2.85246e-08	303.66	1.83375e-08	284.797	2.33371e-07	310.943	7.39423e-08	273.269	1.71733e-07	287.1	5.44469e-08	282.136	2.07093e-07	285.222	3.04694e-08	273.269	1.71733e-07	287.1	5.44469e-08	277.769	1.76312e-07
268.193	2.40698e-07	301.556	1.29728e-08	313.559	1.47149e-08	285.509	3.41949e-08	276.804	4.39087e-07	316.804	3.81763e-09	295.189	3.81712e-08	329.615	1.00649e-08	288.522	9.25447e-08	298.556	1.20894e-08	280.959	5.80427e-07	300.935	1.97197e-08	289.057	2.94e-08	294.394	1.69761e-08	325.572	3.22307e-08	303.948	2.06757e-08	285.086	2.62063e-07	311.208	8.24272e-08	273.58	1.94796e-07	287.403	6.16983e-08	282.425	2.3283e-07	285.509	3.41949e-08	273.58	1.94796e-07	287.403	6.16983e-08	278.073	1.99411e-07
268.493	2.70832e-07	301.839	1.45775e-08	313.843	1.6598e-08	285.796	3.83565e-08	277.092	4.91707e-07	317.083	4.21285e-09	295.475	4.28629e-08	329.872	1.12639e-08	288.819	1.04593e-07	298.854	1.36852e-08	281.242	6.49331e-07	301.231	2.23245e-08	289.357	3.32595e-08	294.697	1.92515e-08	325.855	3.64005e-08	304.236	2.33002e-08	285.374	2.94132e-07	311.473	9.18462e-08	273.89	2.20826e-07	287.706	6.9876e-08	282.715	2.61633e-07	285.796	3.83565e-08	273.89	2.20826e-07	287.706	6.9876e-08	278.376	2.25408e-07
268.793	3.0457e-07	302.123	1.63726e-08	314.126	1.8713e-08	286.084	4.30026e-08	277.38	5.50352e-07	317.362	4.64702e-09	295.76	4.81073e-08	330.129	1.26011e-08	289.115	1.18147e-07	299.152	1.54833e-08	281.526	7.26057e-07	301.526	2.52598e-08	289.658	3.76048e-08	294.999	2.18195e-08	326.138	4.10895e-08	304.524	2.62443e-08	285.663	3.29956e-07	311.737	1.02298e-07	274.201	2.50186e-07	288.009	7.90927e-08	283.004	2.93849e-07	286.084	4.30026e-08	274.201	2.50186e-07	288.009	7.90927e-08	278.68	2.5465e-07
269.093	3.42321e-07	302.406	1.83797e-08	314.41	2.10869e-08	286.371	4.81871e-08	277.668	6.15676e-07	317.641	5.12379e-09	296.045	5.39662e-08	330.385	1.40917e-08	289.411	1.33385e-07	299.45	1.7508e-08	281.81	8.11448e-07	301.821	2.85658e-08	289.958	4.24941e-08	295.301	2.47162e-08	326.421	4.63598e-08	304.812	2.95454e-08	285.951	3.69953e-07	312.002	1.1389e-07	274.511	2.8328e-07	288.312	8.94745e-08	283.294	3.29865e-07	286.371	4.81871e-08	274.511	2.8328e-07	288.312	8.94745e-08	278.983	2.87524e-07
269.393	3.84538e-07	302.69	2.06227e-08	314.694	2.37502e-08	286.658	5.39691e-08	277.956	6.88403e-07	317.919	5.6471e-09	296.33	6.05083e-08	330.642	1.57528e-08	289.707	1.50507e-07	299.747	1.97866e-08	282.094	9.06435e-07	302.116	3.22871e-08	290.259	4.79924e-08	295.604	2.79816e-08	326.704	5.22804e-08	305.1	3.32447e-08	286.24	4.14586e-07	312.267	1.26741e-07	274.822	3.20562e-07	288.615	1.01162e-07	283.583	3.70108e-07	286.658	5.39691e-08	274.822	3.20562e-07	288.615	1.01162e-07	279.287	3.24458e-07
269.693	4.31723e-07	302.973	2.3128e-08	314.977	2.67368e-08	286.945	6.04141e-08	278.244	7.69327e-07	318.198	6.22125e-09	296.616	6.78095e-08	330.899	1.7603e-08	290.004	1.69736e-07	300.045	2.23496e-08	282.377	1.01204e-06	302.411	3.64736e-08	290.559	5.41719e-08	295.906	3.16606e-08	326.987	5.89283e-08	305.388	3.7388e-08	286.528	4.64366e-07	312.532	1.40981e-07	275.132	3.62534e-07	288.919	1.14311e-07	283.872	4.1505e-07	286.945	6.04141e-08	275.132	3.62534e-07	288.919	1.14311e-07	279.59	3.6593e-07
269.992	4.84431e-07	303.257	2.59249e-08	315.261	3.00839e-08	287.233	6.75945e-08	278.531	8.59325e-07	318.477	6.85092e-09	296.901	7.59535e-08	331.156	1.96633e-08	290.3	1.91319e-07	300.343	2.52308e-08	282.661	1.12939e-06	302.706	4.11809e-08	290.86	6.11131e-08	296.209	3.58032e-08	327.271	6.63888e-08	305.676	4.20263e-08	286.817	5.19856e-07	312.796	1.56754e-07	275.443	4.09759e-07	289.222	1.29096e-07	284.162	4.65213e-07	287.233	6.75945e-08	275.443	4.09759e-07	289.222	1.29096e-07	279.894	4.1247e-07
270.292	5.43272e-07	303.54	2.90457e-08	315.545	3.38333e-08	287.52	7.55899e-08	278.819	9.59361e-07	318.756	7.54117e-09	297.186	8.5033e-08	331.413	2.19564e-08	290.596	2.1553e-07	300.641	2.84679e-08	282.945	1.25973e-06	303.002	4.64707e-08	291.16	6.89054e-08	296.511	4.04649e-08	327.554	7.47572e-08	305.964	4.72159e-08	287.106	5.81679e-07	313.061	1.74218e-07	275.753	4.62861e-07	289.525	1.45711e-07	284.451	5.21175e-07	287.52	7.55899e-08	275.753	4.62861e-07	289.525	1.45711e-07	280.197	4.64666e-07
270.592	6.08925e-07	303.824	3.25261e-08	315.828	3.80312e-08	287.807	8.4488e-08	279.107	1.0705e-06	319.034	8.29752e-09	297.472	9.51502e-08	331.669	2.45078e-08	290.892	2.42674e-07	300.938	3.21027e-08	283.228	1.40442e-06	303.297	5.24119e-08	291.461	7.7648e-08	296.814	4.57079e-08	327.837	8.41391e-08	306.252	5.30191e-08	287.394	6.5052e-07	313.326	1.93544e-07	276.064	5.22534e-07	289.828	1.64371e-07	284.741	5.83572e-07	287.807	8.4488e-08	276.064	5.22534e-07	289.828	1.64371e-07	280.501	5.23171e-07
270.892	6.82134e-07	304.107	3.64057e-08	316.112	4.27289e-08	288.095	9.43855e-08	279.395	1.1939e-06	319.313	9.12594e-09	297.757	1.06418e-07	331.926	2.73454e-08	291.189	2.7309e-07	301.236	3.61819e-08	283.512	1.56495e-06	303.592	5.90811e-08	291.761	8.74512e-08	297.116	5.1601e-08	328.12	9.4652e-08	306.54	5.95053e-08	287.683	7.27136e-07	313.591	2.14921e-07	276.374	5.89549e-07	290.131	1.85316e-07	285.03	6.53108e-07	288.095	9.43855e-08	276.374	5.89549e-07	290.131	1.85316e-07	280.804	5.88711e-07
271.192	7.63722e-07	304.39	4.07279e-08	316.396	4.7983e-08	288.382	1.05389e-07	279.683	1.33084e-06	319.592	1.00329e-08	298.042	1.1896e-07	332.183	3.05002e-08	291.485	3.07153e-07	301.534	4.07572e-08	283.796	1.74298e-06	303.887	6.65631e-08	292.062	9.84372e-08	297.419	5.82212e-08	328.403	1.06426e-07	306.828	6.67508e-08	287.971	8.12358e-07	313.855	2.38557e-07	276.685	6.64764e-07	290.434	2.08812e-07	285.32	7.3056e-07	288.382	1.05389e-07	276.685	6.64764e-07	290.434	2.08812e-07	281.108	6.62088e-07
271.492	8.54597e-07	304.674	4.55408e-08	316.68	5.38565e-08	288.669	1.17615e-07	279.971	1.48273e-06	319.871	1.10255e-08	298.328	1.32913e-07	332.44	3.40062e-08	291.781	3.45278e-07	301.832	4.58859e-08	284.08	1.9403e-06	304.182	7.49524e-08	292.362	1.10742e-07	297.721	6.56537e-08	328.686	1.19607e-07	307.116	7.48403e-08	288.26	9.07103e-07	314.12	2.6468e-07	276.995	7.4913e-07	290.737	2.35153e-07	285.609	8.16782e-07	288.669	1.17615e-07	276.995	7.4913e-07	290.737	2.35153e-07	281.411	7.44189e-07
271.792	9.55756e-07	304.957	5.08974e-08	316.963	6.0419e-08	288.957	1.31193e-07	280.259	1.65112e-06	320.149	1.21113e-08	298.613	1.48429e-07	332.697	3.7901e-08	292.077	3.87927e-07	302.129	5.16318e-08	284.363	2.15889e-06	304.477	8.43538e-08	292.663	1.24515e-07	298.024	7.39933e-08	328.969	1.34353e-07	307.404	8.38673e-08	288.548	1.01238e-06	314.385	2.93536e-07	277.306	8.43702e-07	291.04	2.64668e-07	285.898	9.12717e-07	288.957	1.31193e-07	277.306	8.43702e-07	291.04	2.64668e-07	281.715	8.36e-07
272.091	1.0683e-06	305.241	5.6856e-08	317.247	6.77477e-08	289.244	1.46265e-07	280.547	1.83769e-06	320.428	1.32985e-08	298.898	1.65673e-07	332.953	4.22261e-08	292.373	4.35609e-07	302.427	5.80655e-08	284.647	2.40092e-06	304.773	9.48835e-08	292.964	1.39923e-07	298.326	8.33452e-08	329.252	1.50844e-07	307.692	9.39351e-08	288.837	1.12929e-06	314.649	3.25399e-07	277.616	9.49648e-07	291.343	2.97718e-07	286.188	1.0194e-06	289.244	1.46265e-07	277.616	9.49648e-07	291.343	2.97718e-07	282.018	9.38607e-07
272.391	1.19344e-06	305.524	6.3481e-08	317.531	7.59278e-08	289.531	1.62984e-07	280.835	2.0443e-06	320.707	1.45961e-08	299.184	1.84828e-07	333.21	4.70271e-08	292.67	4.88888e-07	302.725	6.52652e-08	284.931	2.66877e-06	305.068	1.0667e-07	293.264	1.57151e-07	298.629	9.38262e-08	329.535	1.69276e-07	307.98	1.05158e-07	289.125	1.25906e-06	314.914	3.60566e-07	277.927	1.06826e-06	291.647	3.34706e-07	286.477	1.13798e-06	289.531	1.62984e-07	277.927	1.06826e-06	291.647	3.34706e-07	282.322	1.05321e-06
272.691	1.33249e-06	305.808	7.08429e-08	317.814	8.50534e-08	289.818	1.81523e-07	281.123	2.27297e-06	320.986	1.60138e-08	299.469	2.06093e-07	333.467	5.23544e-08	292.966	5.48389e-07	303.023	7.33176e-08	285.215	2.96504e-06	305.363	1.19857e-07	293.565	1.76402e-07	298.931	1.05566e-07	329.818	1.89867e-07	308.268	1.17661e-07	289.414	1.40303e-06	315.179	3.99363e-07	278.237	1.20098e-06	291.95	3.76077e-07	286.767	1.26972e-06	289.818	1.81523e-07	278.237	1.20098e-06	291.95	3.76077e-07	282.625	1.18115e-06
272.991	1.48693e-06	306.091	7.90197e-08	318.098	9.52287e-08	290.106	2.02067e-07	281.411	2.52594e-06	321.264	1.7562e-08	299.754	2.29691e-07	333.724	5.82633e-08	293.262	6.14801e-07	303.32	8.23184e-08	285.498	3.29257e-06	305.658	1.34602e-07	293.865	1.979e-07	299.233	1.18707e-07	330.101	2.12859e-07	308.556	1.31584e-07	289.702	1.56265e-06	315.444	4.42144e-07	278.548	1.34938e-06	292.253	4.22321e-07	287.056	1.41598e-06	290.106	2.02067e-07	278.548	1.34938e-06	292.253	4.22321e-07	282.929	1.32388e-06
273.291	1.65835e-06	306.375	8.80969e-08	318.382	1.06569e-07	290.393	2.24823e-07	281.699	2.80562e-06	321.543	1.92521e-08	300.039	2.55862e-07	333.981	6.48149e-08	293.558	6.88885e-07	303.618	9.23738e-08	285.782	3.65448e-06	305.953	1.5108e-07	294.166	2.21895e-07	299.536	1.33409e-07	330.384	2.38518e-07	308.844	1.47079e-07	289.991	1.73954e-06	315.708	4.89298e-07	278.858	1.51522e-06	292.556	4.73984e-07	287.346	1.57829e-06	290.393	2.24823e-07	278.858	1.51522e-06	292.556	4.73984e-07	283.232	1.48301e-06
273.591	1.84852e-06	306.658	9.81684e-08	318.665	1.192e-07	290.68	2.50014e-07	281.987	3.11468e-06	321.822	2.10962e-08	300.325	2.84872e-07	334.237	7.20762e-08	293.855	7.7148e-07	303.916	1.03601e-07	286.066	4.05417e-06	306.249	1.69484e-07	294.466	2.48662e-07	299.838	1.49848e-07	330.667	2.6714e-07	309.132	1.64314e-07	290.279	1.93546e-06	315.973	5.41249e-07	279.169	1.70044e-06	292.859	5.31666e-07	287.635	1.75831e-06	290.68	2.50014e-07	279.169	1.70044e-06	292.859	5.31666e-07	283.536	1.66034e-06
273.891	2.05935e-06	306.942	1.09337e-07	318.949	1.33262e-07	290.968	2.77886e-07	282.275	3.45602e-06	322.101	2.31076e-08	300.61	3.17012e-07	334.494	8.0121e-08	294.151	8.63513e-07	304.214	1.16129e-07	286.349	4.49536e-06	306.544	1.90028e-07	294.767	2.78501e-07	300.141	1.68217e-07	330.95	2.99049e-07	309.42	1.83476e-07	290.568	2.15234e-06	316.238	5.98459e-07	279.48	1.90715e-06	293.162	5.96031e-07	287.924	1.95788e-06	290.968	2.77886e-07	279.48	1.90715e-06	293.162	5.96031e-07	283.839	1.85783e-06
274.19	2.29296e-06	307.225	1.21717e-07	319.233	1.4891e-07	291.255	3.08708e-07	282.562	3.83281e-06	322.379	2.53006e-08	300.895	3.52601e-07	334.751	8.90304e-08	294.447	9.66005e-07	304.511	1.30101e-07	286.633	4.9821e-06	306.839	2.12947e-07	295.067	3.11748e-07	300.443	1.88732e-07	331.234	3.34606e-07	309.707	2.04767e-07	290.856	2.3923e-06	316.503	6.61433e-07	279.79	2.13773e-06	293.465	6.67809e-07	288.214	2.17899e-06	291.255	3.08708e-07	279.79	2.13773e-06	293.465	6.67809e-07	284.143	2.07763e-06
274.49	2.55167e-06	307.509	1.35432e-07	319.516	1.66312e-07	291.542	3.42775e-07	282.85	4.24851e-06	322.658	2.76906e-08	301.181	3.91989e-07	335.008	9.88934e-08	294.743	1.08008e-06	304.809	1.45675e-07	286.917	5.51883e-06	307.134	2.38504e-07	295.368	3.4877e-07	300.746	2.11629e-07	331.517	3.74207e-07	309.995	2.28413e-07	291.145	2.65765e-06	316.767	7.3072e-07	280.101	2.39476e-06	293.768	7.47807e-07	288.503	2.42385e-06	291.542	3.42775e-07	280.101	2.39476e-06	293.768	7.47807e-07	284.446	2.32213e-06
274.79	2.83799e-06	307.792	1.50618e-07	319.8	1.85657e-07	291.83	3.80407e-07	283.138	4.70689e-06	322.937	3.02941e-08	301.466	4.35558e-07	335.265	1.09808e-07	295.04	1.20698e-06	305.107	1.63023e-07	287.201	6.11036e-06	307.429	2.66984e-07	295.668	3.89972e-07	301.048	2.37171e-07	331.8	4.18291e-07	310.283	2.54659e-07	291.433	2.95092e-06	317.032	8.06918e-07	280.411	2.68111e-06	294.071	8.36915e-07	288.793	2.69485e-06	291.83	3.80407e-07	280.411	2.68111e-06	294.071	8.36915e-07	284.75	2.59394e-06
275.09	3.1547e-06	308.076	1.67424e-07	320.084	2.07149e-07	292.117	4.21957e-07	283.426	5.21206e-06	323.216	3.31291e-08	301.751	4.83728e-07	335.521	1.21881e-07	295.336	1.34806e-06	305.405	1.82339e-07	287.484	6.76196e-06	307.724	2.98704e-07	295.969	4.35798e-07	301.351	2.65645e-07	332.083	4.6734e-07	310.571	2.83775e-07	291.722	3.27486e-06	317.297	8.90681e-07	280.722	2.99991e-06	294.375	9.36111e-07	289.082	2.99464e-06	292.117	4.21957e-07	280.722	2.99991e-06	294.375	9.36111e-07	285.053	2.89593e-06
275.39	3.50482e-06	308.359	1.86014e-07	320.368	2.31014e-07	292.404	4.67807e-07	283.714	5.7685e-06	323.494	3.6215e-08	302.037	5.36955e-07	335.778	1.35232e-07	295.632	1.50482e-06	305.702	2.03831e-07	287.768	7.47935e-06	308.02	3.34015e-07	296.269	4.86738e-07	301.653	2.97371e-07	332.366	5.21884e-07	310.859	3.16059e-07	292.01	3.63251e-06	317.562	9.82717e-07	281.032	3.35462e-06	294.678	1.04647e-06	289.372	3.3261e-06	292.404	4.67807e-07	281.032	3.35462e-06	294.678	1.04647e-06	285.357	3.23126e-06
275.69	3.89165e-06	308.643	2.06567e-07	320.651	2.57502e-07	292.691	5.18376e-07	284.002	6.38109e-06	323.773	3.95725e-08	302.322	5.95741e-07	336.035	1.49988e-07	295.928	1.6789e-06	306	2.27732e-07	288.052	8.26878e-06	308.315	3.73299e-07	296.57	5.4333e-07	301.956	3.32697e-07	332.649	5.8251e-07	311.147	3.51836e-07	292.299	4.02715e-06	317.826	1.0838e-06	281.343	3.74905e-06	294.981	1.16918e-06	289.661	3.69237e-06	292.691	5.18376e-07	281.343	3.74905e-06	294.981	1.16918e-06	285.66	3.60338e-06
275.99	4.31879e-06	308.926	2.29277e-07	320.935	2.86885e-07	292.979	5.74119e-07	284.29	7.05513e-06	324.052	4.3224e-08	302.607	6.6063e-07	336.292	1.66293e-07	296.224	1.87212e-06	306.298	2.54297e-07	288.335	9.13702e-06	308.61	4.16979e-07	296.87	6.06165e-07	302.258	3.72011e-07	332.932	6.49861e-07	311.435	3.91463e-07	292.587	4.46238e-06	318.091	1.19476e-06	281.653	4.18736e-06	295.284	1.30554e-06	289.95	4.09691e-06	292.979	5.74119e-07	281.653	4.18736e-06	295.284	1.30554e-06	285.964	4.0161e-06
276.289	4.79017e-06	309.21	2.54359e-07	321.219	3.19462e-07	293.266	6.35533e-07	284.578	7.79638e-06	324.331	4.71938e-08	302.892	7.32221e-07	336.549	1.843e-07	296.521	2.08645e-06	306.596	2.83806e-07	288.619	1.00915e-05	308.905	4.65521e-07	297.171	6.7589e-07	302.561	4.15735e-07	333.215	7.24644e-07	311.723	4.35331e-07	292.876	4.9421e-06	318.356	1.31653e-06	281.964	4.67414e-06	295.587	1.45698e-06	290.24	4.54346e-06	293.266	6.35533e-07	281.964	4.67414e-06	295.587	1.45698e-06	286.267	4.47357e-06
276.589	5.31007e-06	309.493	2.82045e-07	321.502	3.55563e-07	293.553	7.0316e-07	284.866	8.61111e-06	324.609	5.15078e-08	303.178	8.11162e-07	336.805	2.04182e-07	296.817	2.32406e-06	306.893	3.16565e-07	288.903	1.11401e-05	309.2	5.19435e-07	297.472	7.53217e-07	302.863	4.64338e-07	333.498	8.07639e-07	312.011	4.83867e-07	293.165	5.47059e-06	318.621	1.45008e-06	282.274	5.21441e-06	295.89	1.62506e-06	290.529	5.03614e-06	293.553	7.0316e-07	282.274	5.21441e-06	295.89	1.62506e-06	286.571	4.98035e-06
276.889	5.88315e-06	309.777	3.12592e-07	321.786	3.95547e-07	293.841	7.77587e-07	285.154	9.50613e-06	324.888	5.61939e-08	303.463	8.98164e-07	337.062	2.26123e-07	297.113	2.58734e-06	307.191	3.52914e-07	289.187	1.22916e-05	309.495	5.79283e-07	297.772	8.38923e-07	303.165	5.1833e-07	333.781	8.99701e-07	312.299	5.3754e-07	293.453	6.0525e-06	318.885	1.59649e-06	282.585	5.81367e-06	296.193	1.81151e-06	290.819	5.57941e-06	293.841	7.77587e-07	282.585	5.81367e-06	296.193	1.81151e-06	286.874	5.5414e-06
277.189	6.51448e-06	310.06	3.46276e-07	322.07	4.3981e-07	294.128	8.59455e-07	285.442	1.04888e-05	325.167	6.12823e-08	303.748	9.93999e-07	337.319	2.50328e-07	297.409	2.8789e-06	307.489	3.93221e-07	289.47	1.35555e-05	309.791	6.45679e-07	298.073	9.33861e-07	303.468	5.78274e-07	334.064	1.00177e-06	312.587	5.96861e-07	293.742	6.69286e-06	319.15	1.75694e-06	282.895	6.47795e-06	296.496	2.0182e-06	291.108	6.17817e-06	294.128	8.59455e-07	282.895	6.47795e-06	296.496	2.0182e-06	287.178	6.1622e-06
277.489	7.20958e-06	310.343	3.83401e-07	322.353	4.88784e-07	294.415	9.49459e-07	285.73	1.15672e-05	325.445	6.68051e-08	304.034	1.09951e-06	337.576	2.7702e-07	297.706	3.20159e-06	307.787	4.37893e-07	289.754	1.4942e-05	310.086	7.193e-07	298.373	1.03896e-06	303.77	6.44786e-07	334.347	1.11487e-06	312.875	6.62391e-07	294.03	7.39719e-06	319.415	1.93268e-06	283.206	7.21385e-06	296.799	2.24721e-06	291.398	6.83772e-06	294.415	9.49459e-07	283.206	7.21385e-06	296.799	2.24721e-06	287.481	6.84868e-06
277.789	7.97445e-06	310.627	4.24297e-07	322.637	5.42942e-07	294.703	1.04836e-06	286.018	1.27499e-05	325.724	7.27971e-08	304.319	1.21561e-06	337.833	3.06443e-07	298.002	3.55853e-06	308.084	4.87373e-07	290.038	1.64622e-05	310.381	8.00886e-07	298.674	1.15525e-06	304.073	7.18544e-07	334.63	1.24013e-06	313.163	7.34739e-07	294.319	8.17144e-06	319.68	2.12509e-06	283.516	8.02858e-06	297.103	2.50079e-06	291.687	7.56385e-06	294.703	1.04836e-06	283.516	8.02858e-06	297.103	2.50079e-06	287.785	7.60736e-06
278.089	8.81561e-06	310.91	4.69324e-07	322.921	6.02804e-07	294.99	1.15697e-06	286.305	1.40464e-05	326.003	7.92956e-08	304.604	1.34329e-06	338.09	3.38865e-07	298.298	3.95314e-06	308.382	5.42148e-07	290.321	1.81281e-05	310.676	8.91247e-07	298.974	1.28385e-06	304.375	8.00289e-07	334.914	1.3788e-06	313.451	8.14573e-07	294.607	9.02211e-06	319.944	2.33565e-06	283.827	8.93001e-06	297.406	2.78141e-06	291.976	8.36286e-06	294.99	1.15697e-06	283.827	8.93001e-06	297.406	2.78141e-06	288.088	8.44533e-06
278.388	9.74013e-06	311.194	5.18874e-07	323.205	6.68934e-07	295.277	1.27618e-06	286.593	1.54667e-05	326.282	8.63405e-08	304.89	1.48364e-06	338.346	3.74576e-07	298.594	4.38914e-06	308.68	6.0275e-07	290.605	1.99528e-05	310.971	9.91271e-07	299.275	1.42596e-06	304.678	8.9083e-07	335.197	1.53222e-06	313.739	9.0262e-07	294.896	9.95622e-06	320.209	2.56598e-06	284.137	9.92675e-06	297.709	3.09177e-06	292.266	9.2416e-06	295.277	1.27618e-06	284.137	9.92675e-06	297.709	3.09177e-06	288.392	9.37032e-06
278.688	1.07557e-05	311.477	5.73374e-07	323.488	7.41951e-07	295.564	1.40696e-06	286.881	1.70221e-05	326.56	9.39748e-08	305.175	1.63783e-06	338.603	4.13896e-07	298.891	4.87061e-06	308.978	6.6976e-07	290.889	2.19503e-05	311.267	1.10193e-06	299.575	1.58292e-06	304.98	9.91057e-07	335.48	1.70188e-06	314.027	9.99673e-07	295.184	1.09814e-05	320.474	2.81781e-06	284.448	1.10282e-05	298.012	3.43481e-06	292.555	1.02075e-05	295.564	1.40696e-06	284.448	1.10282e-05	298.012	3.43481e-06	288.695	1.03908e-05
278.988	1.18706e-05	311.761	6.33286e-07	323.772	8.22531e-07	295.852	1.55036e-06	287.169	1.87242e-05	326.839	1.02245e-07	305.46	1.80714e-06	338.86	4.57171e-07	299.187	5.40199e-06	309.275	7.43814e-07	291.173	2.41358e-05	311.562	1.22429e-06	299.876	1.75618e-06	305.283	1.10194e-06	335.763	1.88941e-06	314.315	1.1066e-06	295.473	1.2106e-05	320.739	3.09303e-06	284.758	1.22446e-05	298.315	3.81376e-06	292.845	1.12687e-05	295.852	1.55036e-06	284.758	1.22446e-05	298.315	3.81376e-06	288.999	1.15159e-05
279.288	1.30938e-05	312.044	6.99113e-07	324.056	9.11412e-07	296.139	1.7075e-06	287.457	2.05861e-05	327.118	1.11199e-07	305.746	1.99296e-06	339.117	5.04781e-07	299.483	5.98811e-06	309.573	8.25604e-07	291.456	2.65259e-05	311.857	1.3595e-06	300.176	1.94732e-06	305.585	1.22454e-06	336.046	2.09659e-06	314.603	1.22433e-06	295.761	1.33388e-05	321.003	3.39368e-06	285.069	1.35871e-05	298.618	4.23212e-06	293.134	1.24339e-05	296.139	1.7075e-06	285.069	1.35871e-05	298.618	4.23212e-06	289.302	1.27557e-05
279.588	1.44351e-05	312.328	7.71404e-07	324.339	1.0094e-06	296.426	1.87962e-06	287.745	2.26215e-05	327.397	1.20891e-07	306.031	2.19677e-06	339.374	5.57141e-07	299.779	6.63426e-06	309.871	9.15888e-07	291.74	2.91384e-05	312.152	1.50883e-06	300.477	2.15807e-06	305.888	1.36001e-06	336.329	2.32535e-06	314.891	1.3539e-06	296.05	1.46897e-05	321.268	3.72195e-06	285.379	1.50678e-05	298.921	4.69371e-06	293.424	1.37126e-05	296.426	1.87962e-06	285.379	1.50678e-05	298.921	4.69371e-06	289.606	1.41209e-05
279.888	1.59051e-05	312.611	8.50751e-07	324.623	1.11736e-06	296.714	2.06803e-06	288.033	2.48455e-05	327.675	1.31377e-07	306.316	2.42022e-06	339.63	6.14701e-07	300.075	7.34617e-06	310.169	1.01549e-06	292.024	3.19923e-05	312.447	1.67367e-06	300.777	2.39029e-06	306.19	1.50961e-06	336.612	2.57781e-06	315.179	1.49641e-06	296.338	1.61691e-05	321.533	4.08024e-06	285.69	1.66999e-05	299.224	5.2027e-06	293.713	1.51152e-05	296.714	2.06803e-06	285.69	1.66999e-05	299.224	5.2027e-06	289.909	1.56236e-05
280.188	1.75151e-05	312.895	9.37798e-07	324.907	1.23627e-06	297.001	2.27418e-06	288.321	2.72742e-05	327.954	1.42718e-07	306.601	2.66506e-06	339.887	6.77954e-07	300.372	8.1301e-06	310.466	1.12531e-06	292.308	3.51085e-05	312.742	1.85553e-06	301.078	2.64603e-06	306.493	1.67473e-06	336.895	2.85629e-06	315.467	1.65308e-06	296.627	1.77884e-05	321.798	4.47109e-06	286	1.84978e-05	299.528	5.76362e-06	294.002	1.66529e-05	297.001	2.27418e-06	286	1.84978e-05	299.528	5.76362e-06	290.213	1.72764e-05
280.487	1.92775e-05	313.178	1.03324e-06	325.19	1.36714e-06	297.288	2.4996e-06	288.609	2.99251e-05	328.233	1.54979e-07	306.887	2.9332e-06	340.144	7.47434e-07	300.668	8.99284e-06	310.764	1.24632e-06	292.591	3.85092e-05	313.038	2.05604e-06	301.379	2.9275e-06	306.795	1.85686e-06	337.178	3.16331e-06	315.755	1.82523e-06	296.915	1.95598e-05	322.062	4.89729e-06	286.311	2.04772e-05	299.831	6.3814e-06	294.292	1.83377e-05	297.288	2.4996e-06	286.311	2.04772e-05	299.831	6.3814e-06	290.516	1.90933e-05
280.787	2.12055e-05	313.462	1.13784e-06	325.474	1.51113e-06	297.576	2.74597e-06	288.897	3.28168e-05	328.512	1.68228e-07	307.172	3.22669e-06	340.401	8.23726e-07	300.964	9.94178e-06	311.062	1.3796e-06	292.875	4.22184e-05	313.333	2.277e-06	301.679	3.23711e-06	307.097	2.05765e-06	337.461	3.50164e-06	316.043	2.01426e-06	297.204	2.14966e-05	322.327	5.36182e-06	286.622	2.26549e-05	300.134	7.06141e-06	294.581	2.01828e-05	297.576	2.74597e-06	286.622	2.26549e-05	300.134	7.06141e-06	290.82	2.10895e-05
281.087	2.33135e-05	313.745	1.25241e-06	325.758	1.66945e-06	297.863	3.01509e-06	289.185	3.59695e-05	328.79	1.82541e-07	307.457	3.54778e-06	340.658	9.07464e-07	301.26	1.09849e-05	311.36	1.52629e-06	293.159	4.62622e-05	313.628	2.52035e-06	301.98	3.57747e-06	307.4	2.27885e-06	337.744	3.87426e-06	316.331	2.22175e-06	297.492	2.36131e-05	322.592	5.8679e-06	286.932	2.50493e-05	300.437	7.80946e-06	294.871	2.22022e-05	297.863	3.01509e-06	286.932	2.50493e-05	300.437	7.80946e-06	291.123	2.32813e-05
281.387	2.5617e-05	314.029	1.37784e-06	326.041	1.84345e-06	298.15	3.30891e-06	289.473	3.94051e-05	329.069	1.97997e-07	307.743	3.89886e-06	340.914	9.9934e-07	301.557	1.2131e-05	311.658	1.68766e-06	293.442	5.06683e-05	313.923	2.78821e-06	302.28	3.95142e-06	307.702	2.52242e-06	338.027	4.28446e-06	316.619	2.44935e-06	297.781	2.59246e-05	322.857	6.41899e-06	287.243	2.76803e-05	300.74	8.63186e-06	295.16	2.44115e-05	298.15	3.30891e-06	287.243	2.76803e-05	300.74	8.63186e-06	291.427	2.56864e-05
281.687	2.81326e-05	314.312	1.51509e-06	326.325	2.03458e-06	298.437	3.62951e-06	289.761	4.31467e-05	329.348	2.1468e-07	308.028	4.28253e-06	341.171	1.1001e-06	301.853	1.33895e-05	311.955	1.86507e-06	293.726	5.54668e-05	314.218	3.08289e-06	302.581	4.36203e-06	308.005	2.79045e-06	338.31	4.73578e-06	316.907	2.69889e-06	298.069	2.84478e-05	323.121	7.01884e-06	287.553	3.05694e-05	301.043	9.53547e-06	295.45	2.68269e-05	298.437	3.62951e-06	287.553	3.05694e-05	301.043	9.53547e-06	291.73	2.83241e-05
281.987	3.08782e-05	314.596	1.66518e-06	326.609	2.24441e-06	298.725	3.97916e-06	290.049	4.72194e-05	329.627	2.3268e-07	308.313	4.7016e-06	341.428	1.21057e-06	302.149	1.47705e-05	312.253	2.06e-06	294.01	6.06897e-05	314.513	3.40689e-06	302.881	4.81263e-06	308.307	3.08521e-06	338.593	5.23211e-06	317.195	2.97233e-06	298.358	3.12006e-05	323.386	7.67145e-06	287.864	3.37401e-05	301.346	1.05277e-05	295.739	2.94665e-05	298.725	3.97916e-06	287.864	3.37401e-05	301.346	1.05277e-05	292.034	3.12151e-05
282.287	3.38732e-05	314.879	1.82925e-06	326.893	2.47466e-06	299.012	4.36027e-06	290.336	5.16502e-05	329.905	2.52095e-07	308.599	5.15908e-06	341.685	1.33164e-06	302.445	1.62852e-05	312.551	2.27407e-06	294.294	6.63718e-05	314.809	3.76291e-06	303.182	5.30683e-06	308.61	3.40919e-06	338.877	5.77764e-06	317.483	3.2718e-06	298.646	3.42023e-05	323.651	8.38115e-06	288.174	3.72175e-05	301.649	1.16166e-05	296.028	3.23495e-05	299.012	4.36027e-06	288.174	3.72175e-05	301.649	1.16166e-05	292.337	3.43819e-05
282.586	3.71382e-05	315.163	2.00849e-06	327.176	2.72718e-06	299.299	4.77546e-06	290.624	5.6468e-05	330.184	2.73027e-07	308.884	5.65825e-06	341.942	1.46425e-06	302.742	1.79456e-05	312.849	2.50901e-06	294.577	7.25501e-05	315.104	4.15391e-06	303.482	5.84851e-06	308.912	3.76508e-06	339.16	6.37697e-06	317.771	3.59961e-06	298.935	3.74735e-05	323.916	9.15259e-06	288.485	4.1029e-05	301.952	1.28109e-05	296.318	3.54966e-05	299.299	4.77546e-06	288.485	4.1029e-05	301.952	1.28109e-05	292.641	3.78487e-05
282.886	4.06956e-05	315.446	2.20421e-06	327.46	3.00398e-06	299.587	5.22752e-06	290.912	6.17036e-05	330.463	2.95586e-07	309.169	6.2026e-06	342.198	1.60947e-06	303.038	1.97647e-05	313.146	2.76672e-06	294.861	7.92644e-05	315.399	4.58308e-06	303.783	6.44191e-06	309.215	4.15577e-06	339.443	7.03505e-06	318.059	3.95824e-06	299.224	4.10365e-05	324.18	9.99076e-06	288.795	4.52039e-05	302.256	1.412e-05	296.607	3.89302e-05	299.587	5.22752e-06	288.795	4.52039e-05	302.256	1.412e-05	292.944	4.16417e-05
283.186	4.45692e-05	315.73	2.41781e-06	327.744	3.30723e-06	299.874	5.71947e-06	291.2	6.73901e-05	330.742	3.1989e-07	309.455	6.79591e-06	342.455	1.76843e-06	303.334	2.17564e-05	313.444	3.04922e-06	295.145	8.65575e-05	315.694	5.05389e-06	304.083	7.09156e-06	309.517	4.58442e-06	339.726	7.75728e-06	318.347	4.35037e-06	299.512	4.49153e-05	324.445	1.0901e-05	289.106	4.97741e-05	302.559	1.5554e-05	296.897	4.26744e-05	299.874	5.71947e-06	289.106	4.97741e-05	302.559	1.5554e-05	293.248	4.57892e-05
283.486	4.87848e-05	316.013	2.65081e-06	328.027	3.6393e-06	300.161	6.25455e-06	291.488	7.35632e-05	331.02	3.46062e-07	309.74	7.44224e-06	342.712	1.94236e-06	303.63	2.39359e-05	313.742	3.35874e-06	295.428	9.44751e-05	315.989	5.57006e-06	304.384	7.80239e-06	309.82	5.05443e-06	340.009	8.54952e-06	318.635	4.77891e-06	299.801	4.91355e-05	324.71	1.18891e-05	289.416	5.47737e-05	302.862	1.7124e-05	297.186	4.6755e-05	300.161	6.25455e-06	289.416	5.47737e-05	302.862	1.7124e-05	293.551	5.03214e-05
283.786	5.33697e-05	316.296	2.90483e-06	328.311	4.00272e-06	300.449	6.8362e-06	291.776	8.02607e-05	331.299	3.74237e-07	310.025	8.14596e-06	342.969	2.13259e-06	303.926	2.63196e-05	314.04	3.69766e-06	295.712	0.000103066	316.284	6.13567e-06	304.684	8.5797e-06	310.122	5.56949e-06	340.292	9.4181e-06	318.923	5.24699e-06	300.089	5.37246e-05	324.975	1.29612e-05	289.727	6.02398e-05	303.165	1.88418e-05	297.476	5.12e-05	300.449	6.8362e-06	289.727	6.02398e-05	303.165	1.88418e-05	293.855	5.52713e-05
284.086	5.83535e-05	316.58	3.18164e-06	328.595	4.40026e-06	300.736	7.46816e-06	292.064	8.75233e-05	331.578	4.04555e-07	310.31	8.91174e-06	343.226	2.34057e-06	304.223	2.89251e-05	314.337	4.06855e-06	295.996	0.000112383	316.58	6.75508e-06	304.985	9.4292e-06	310.425	6.13358e-06	340.575	1.03699e-05	319.211	5.75796e-06	300.378	5.87123e-05	325.239	1.41239e-05	290.037	6.6212e-05	303.468	2.07202e-05	297.765	5.60393e-05	300.736	7.46816e-06	290.037	6.6212e-05	303.468	2.07202e-05	294.158	6.06741e-05
284.386	6.37677e-05	316.863	3.4831e-06	328.878	4.83489e-06	301.023	8.15439e-06	292.352	9.53944e-05	331.857	4.37168e-07	310.596	9.74463e-06	343.482	2.56787e-06	304.519	3.17714e-05	314.635	4.4742e-06	296.28	0.000122482	316.875	7.43304e-06	305.285	1.0357e-05	310.727	6.751e-06	340.858	1.14124e-05	319.499	6.31547e-06	300.666	6.41301e-05	325.504	1.53844e-05	290.348	7.2733e-05	303.771	2.2773e-05	298.054	6.13051e-05	301.023	8.15439e-06	290.348	7.2733e-05	303.771	2.2773e-05	294.462	6.65677e-05
284.685	6.9646e-05	317.147	3.81125e-06	329.162	5.30983e-06	301.31	8.89915e-06	292.64	0.00010392	332.135	4.72235e-07	310.881	1.065e-05	343.739	2.81618e-06	304.815	3.4879e-05	314.933	4.91761e-06	296.563	0.000133422	317.17	8.17466e-06	305.586	1.13699e-05	311.029	7.42639e-06	341.141	1.25536e-05	319.787	6.92343e-06	300.955	7.0012e-05	325.769	1.67502e-05	290.658	7.98488e-05	304.074	2.50149e-05	298.344	6.70318e-05	301.31	8.89915e-06	290.658	7.98488e-05	304.074	2.50149e-05	294.765	7.29928e-05
284.985	7.60245e-05	317.43	4.16827e-06	329.446	5.82852e-06	301.598	9.70701e-06	292.928	0.00011315	332.414	5.09926e-07	311.166	1.16337e-05	343.996	3.08733e-06	305.111	3.827e-05	315.231	5.40202e-06	296.847	0.000145269	317.465	8.98545e-06	305.887	1.24748e-05	311.332	8.16474e-06	341.424	1.38022e-05	320.075	7.58603e-06	301.243	7.63942e-05	326.034	1.82294e-05	290.969	8.76088e-05	304.377	2.74621e-05	298.633	7.32564e-05	301.598	9.70701e-06	290.969	8.76088e-05	304.377	2.74621e-05	295.069	7.99933e-05
285.285	8.29417e-05	317.714	4.55649e-06	329.73	6.39473e-06	301.885	1.05828e-05	293.216	0.000123137	332.693	5.50424e-07	311.452	1.27018e-05	344.253	3.38333e-06	305.408	4.19681e-05	315.528	5.9309e-06	297.131	0.000158089	317.76	9.87136e-06	306.187	1.36795e-05	311.634	8.97144e-06	341.707	1.51677e-05	320.363	8.30779e-06	301.532	8.33154e-05	326.298	1.98308e-05	291.279	9.60658e-05	304.68	3.01316e-05	298.923	8.00187e-05	301.885	1.05828e-05	291.279	9.60658e-05	304.68	3.01316e-05	295.372	8.7616e-05
285.585	9.04386e-05	317.997	4.97842e-06	330.013	7.01246e-06	302.172	1.15318e-05	293.504	0.000133937	332.972	5.9392e-07	311.737	1.38611e-05	344.51	3.7063e-06	305.704	4.59987e-05	315.826	6.50801e-06	297.414	0.000171955	318.056	1.08388e-05	306.488	1.49922e-05	311.937	9.8523e-06	341.99	1.66603e-05	320.651	9.09359e-06	301.82	9.08172e-05	326.563	2.15636e-05	291.59	0.000105277	304.984	3.30418e-05	299.212	8.73611e-05	302.172	1.15318e-05	291.59	0.000105277	304.984	3.30418e-05	295.676	9.59115e-05
285.885	9.85591e-05	318.281	5.43674e-06	330.297	7.68606e-06	302.46	1.25595e-05	293.792	0.000145609	333.25	6.40618e-07	312.022	1.51186e-05	344.766	4.05858e-06	306	5.03893e-05	316.124	7.13737e-06	297.698	0.000186946	318.351	1.18947e-05	306.788	1.64217e-05	312.239	1.08136e-05	342.273	1.82909e-05	320.939	9.94862e-06	302.109	9.89437e-05	326.828	2.34377e-05	291.9	0.000115302	305.287	3.62127e-05	299.502	9.53292e-05	302.46	1.25595e-05	291.9	0.000115302	305.287	3.62127e-05	295.979	0.000104934
286.185	0.00010735	318.564	5.93434e-06	330.581	8.4202e-06	302.747	1.36718e-05	294.079	0.000158219	333.529	6.90735e-07	312.308	1.64819e-05	345.023	4.44266e-06	306.296	5.51693e-05	316.422	7.82333e-06	297.982	0.000203144	318.646	1.30464e-05	307.089	1.79775e-05	312.542	1.18619e-05	342.557	2.00714e-05	321.227	1.08785e-05	302.397	0.000107742	327.093	2.54639e-05	292.211	0.000126207	305.59	3.96653e-05	299.791	0.000103972	302.747	1.36718e-05	292.211	0.000126207	305.59	3.96653e-05	296.283	0.00011474
286.485	0.000116861	318.848	6.4743e-06	330.864	9.2199e-06	303.034	1.48751e-05	294.367	0.000171832	333.808	7.44502e-07	312.593	1.79591e-05	345.28	4.86126e-06	306.593	6.03702e-05	316.719	8.57054e-06	298.266	0.000220637	318.941	1.4302e-05	307.389	1.96697e-05	312.844	1.30046e-05	342.84	2.20147e-05	321.515	1.18892e-05	302.686	0.000117263	327.357	2.76534e-05	292.521	0.000138062	305.893	4.34226e-05	300.081	0.00011334	303.034	1.48751e-05	292.521	0.000138062	305.893	4.34226e-05	296.586	0.000125393
286.784	0.000127145	319.131	7.05992e-06	331.148	1.00905e-05	303.322	1.61761e-05	294.655	0.000186521	334.087	8.02162e-07	312.878	1.95589e-05	345.537	5.3173e-06	306.889	6.60259e-05	317.017	9.38398e-06	298.549	0.000239518	319.236	1.567e-05	307.69	2.15093e-05	313.147	1.42493e-05	343.123	2.41344e-05	321.803	1.29872e-05	302.974	0.000127559	327.622	3.00183e-05	292.832	0.00015094	306.196	4.75089e-05	300.37	0.000123491	303.322	1.61761e-05	292.832	0.00015094	306.196	4.75089e-05	296.89	0.000136958
287.084	0.000138258	319.415	7.69472e-06	331.432	1.10379e-05	303.609	1.7582e-05	294.943	0.000202363	334.365	8.63974e-07	313.163	2.12906e-05	345.794	5.81392e-06	307.185	7.21725e-05	317.315	1.0269e-05	298.833	0.000259887	319.531	1.71597e-05	307.99	2.35079e-05	313.449	1.56044e-05	343.406	2.64455e-05	322.091	1.41793e-05	303.263	0.000138689	327.887	3.25715e-05	293.142	0.000164921	306.499	5.19504e-05	300.659	0.000134482	303.609	1.7582e-05	293.142	0.000164921	306.499	5.19504e-05	297.193	0.000149507
287.384	0.00015026	319.698	8.38248e-06	331.715	1.20683e-05	303.896	1.91003e-05	295.231	0.000219438	334.644	9.30212e-07	313.449	2.31639e-05	346.05	6.35453e-06	307.481	7.88489e-05	317.613	1.12314e-05	299.117	0.000281849	319.827	1.87809e-05	308.291	2.56779e-05	313.752	1.70787e-05	343.689	2.8964e-05	322.379	1.54729e-05	303.551	0.000150712	328.152	3.53268e-05	293.453	0.000180091	306.802	5.67749e-05	300.949	0.000146379	303.896	1.91003e-05	293.453	0.000180091	306.802	5.67749e-05	297.497	0.000163113
287.684	0.000163215	319.982	9.12723e-06	331.999	1.31884e-05	304.184	2.07392e-05	295.519	0.000237832	334.923	1.00117e-06	313.734	2.51895e-05	346.307	6.94279e-06	307.777	8.60966e-05	317.91	1.22773e-05	299.401	0.000305517	320.122	2.05442e-05	308.591	2.80326e-05	314.054	1.86817e-05	343.972	3.17071e-05	322.667	1.6876e-05	303.84	0.000163694	328.416	3.82987e-05	293.764	0.000196539	307.105	6.20124e-05	301.238	0.000159247	304.184	2.07392e-05	293.764	0.000196539	307.105	6.20124e-05	297.8	0.000177859
287.984	0.000177191	320.265	9.93326e-06	332.283	1.44052e-05	304.471	2.25073e-05	295.807	0.000257636	335.201	1.07714e-06	314.019	2.73784e-05	346.564	7.58264e-06	308.074	9.39598e-05	318.208	1.34132e-05	299.684	0.000331009	320.417	2.24611e-05	308.892	3.05862e-05	314.357	2.04238e-05	344.255	3.46934e-05	322.955	1.83969e-05	304.128	0.000177703	328.681	4.15029e-05	294.074	0.000214362	307.408	6.76947e-05	301.528	0.000173159	304.471	2.25073e-05	294.074	0.000214362	307.408	6.76947e-05	298.104	0.00019383
288.284	0.000192257	320.549	1.08052e-05	332.566	1.57266e-05	304.758	2.44138e-05	296.095	0.000278947	335.48	1.15847e-06	314.305	2.97426e-05	346.821	8.27834e-06	308.37	0.000102486	318.506	1.46463e-05	299.968	0.000358452	320.712	2.45437e-05	309.192	3.33539e-05	314.659	2.23157e-05	344.538	3.79426e-05	323.243	2.00446e-05	304.417	0.000192812	328.946	4.4956e-05	294.385	0.000233662	307.712	7.38559e-05	301.817	0.000188192	304.758	2.44138e-05	294.385	0.000233662	307.712	7.38559e-05	298.407	0.000211116
288.584	0.000208491	320.832	1.17478e-05	332.85	1.71606e-05	305.045	2.64683e-05	296.383	0.000301867	335.759	1.24549e-06	314.59	3.22948e-05	347.078	9.03446e-06	308.666	0.000111726	318.804	1.59839e-05	300.252	0.000387978	321.007	2.68049e-05	309.493	3.63517e-05	314.961	2.43691e-05	344.821	4.14763e-05	323.531	2.18287e-05	304.705	0.000209098	329.211	4.86755e-05	294.695	0.000254549	308.015	8.05323e-05	302.107	0.000204426	305.045	2.64683e-05	294.695	0.000254549	308.015	8.05323e-05	298.711	0.000229816
288.883	0.000225972	321.116	1.27664e-05	333.134	1.87162e-05	305.333	2.86811e-05	296.671	0.000326503	336.038	1.33856e-06	314.875	3.50484e-05	347.334	9.85591e-06	308.962	0.000121733	319.101	1.74343e-05	300.535	0.000419731	321.302	2.92589e-05	309.793	3.95971e-05	315.264	2.65965e-05	345.104	4.53173e-05	323.819	2.37594e-05	304.994	0.000226644	329.475	5.26802e-05	295.006	0.000277138	308.318	8.77625e-05	302.396	0.00022195	305.333	2.86811e-05	295.006	0.000277138	308.318	8.77625e-05	299.014	0.000250033
289.183	0.000244786	321.399	1.38666e-05	333.418	2.04026e-05	305.62	3.10632e-05	296.959	0.000352969	336.316	1.43808e-06	315.161	3.80177e-05	347.591	1.0748e-05	309.259	0.000132565	319.399	1.90058e-05	300.819	0.000453858	321.598	3.19203e-05	310.094	4.31081e-05	315.566	2.90112e-05	345.387	4.94904e-05	324.107	2.58478e-05	305.283	0.000245536	329.74	5.69901e-05	295.316	0.000301553	308.621	9.55878e-05	302.685	0.000240853	305.62	3.10632e-05	295.316	0.000301553	308.621	9.55878e-05	299.318	0.000271877
289.483	0.000265021	321.683	1.50541e-05	333.701	2.223e-05	305.907	3.36261e-05	297.247	0.000381386	336.595	1.54444e-06	315.446	4.12179e-05	347.848	1.17164e-05	309.555	0.000144283	319.697	2.07077e-05	301.103	0.000490519	321.893	3.48052e-05	310.395	4.69045e-05	315.869	3.16273e-05	345.67	5.40218e-05	324.395	2.81053e-05	305.571	0.000265867	330.005	6.16261e-05	295.627	0.000327923	308.924	0.000104052	302.975	0.000261236	305.907	3.36261e-05	295.627	0.000327923	308.924	0.000104052	299.621	0.000295464
289.783	0.000286772	321.966	1.63353e-05	333.985	2.42091e-05	306.195	3.63819e-05	297.535	0.00041188	336.874	1.65807e-06	315.731	4.4665e-05	348.105	1.27672e-05	309.851	0.000156953	319.995	2.25498e-05	301.387	0.000529881	322.188	3.79304e-05	310.695	5.10067e-05	316.171	3.44599e-05	345.953	5.894e-05	324.683	3.05444e-05	305.86	0.000287734	330.27	6.66109e-05	295.937	0.000356388	309.227	0.000113201	303.264	0.0002832	306.195	3.63819e-05	295.937	0.000356388	309.227	0.000113201	299.925	0.000320918
290.083	0.00031014	322.249	1.77168e-05	334.269	2.63514e-05	306.482	3.93436e-05	297.823	0.000444585	337.153	1.77943e-06	316.017	4.83762e-05	348.362	1.3907e-05	310.147	0.000170644	320.292	2.45422e-05	301.67	0.000572119	322.483	4.13142e-05	310.996	5.54369e-05	316.474	3.75251e-05	346.236	6.42752e-05	324.971	3.31783e-05	306.148	0.00031124	330.534	7.1968e-05	296.248	0.000387094	309.53	0.000123086	303.554	0.000306857	306.482	3.93436e-05	296.248	0.000387094	309.53	0.000123086	300.228	0.000348371
290.383	0.000335229	322.533	1.92057e-05	334.552	2.8669e-05	306.769	4.25249e-05	298.11	0.000479642	337.431	1.909e-06	316.302	5.23695e-05	348.618	1.51428e-05	310.443	0.000185428	320.59	2.66962e-05	301.954	0.000617421	322.778	4.49756e-05	311.296	6.02185e-05	316.776	4.08399e-05	346.52	7.00599e-05	325.259	3.60208e-05	306.437	0.000336493	330.799	7.77227e-05	296.558	0.000420195	309.833	0.000133758	303.843	0.000332322	306.769	4.25249e-05	296.558	0.000420195	309.833	0.000133758	300.532	0.000377962
290.683	0.000362151	322.816	2.08096e-05	334.836	3.1175e-05	307.057	4.59401e-05	298.398	0.000517199	337.71	2.04727e-06	316.587	5.6664e-05	348.875	1.64823e-05	310.74	0.000201385	320.888	2.90233e-05	302.238	0.000665981	323.074	4.89353e-05	311.597	6.53761e-05	317.079	4.44225e-05	346.803	7.63288e-05	325.547	3.90869e-05	306.725	0.00036361	331.064	8.39017e-05	296.869	0.000455856	310.136	0.000145273	304.133	0.000359719	307.057	4.59401e-05	296.869	0.000455856	310.136	0.000145273	300.835	0.000409838
290.983	0.000391021	323.1	2.25362e-05	335.12	3.38833e-05	307.344	4.96043e-05	298.686	0.000557412	337.989	2.19478e-06	316.872	6.12799e-05	349.132	1.79334e-05	311.036	0.000218598	321.186	3.15362e-05	302.521	0.000718008	323.369	5.32151e-05	311.897	7.09359e-05	317.381	4.82923e-05	347.086	8.31189e-05	325.835	4.23924e-05	307.014	0.00039271	331.329	9.05333e-05	297.179	0.00049425	310.44	0.000157689	304.422	0.000389179	307.344	4.96043e-05	297.179	0.00049425	310.44	0.000157689	301.139	0.000444155
291.282	0.000421964	323.383	2.43942e-05	335.403	3.68087e-05	307.631	5.35337e-05	298.974	0.000600445	338.268	2.35208e-06	317.158	6.62386e-05	349.389	1.95048e-05	311.332	0.000237154	321.483	3.42479e-05	302.805	0.000773718	323.664	5.78382e-05	312.198	7.69259e-05	317.684	5.24696e-05	347.369	9.047e-05	326.123	4.59539e-05	307.302	0.000423922	331.593	9.76472e-05	297.49	0.000535559	310.743	0.000171071	304.711	0.000420839	307.631	5.35337e-05	297.49	0.000535559	310.743	0.000171071	301.442	0.000481078
291.582	0.000455109	323.667	2.63924e-05	335.687	3.99669e-05	307.918	5.77451e-05	299.262	0.000646471	338.546	2.51977e-06	317.443	7.15626e-05	349.646	2.1206e-05	311.628	0.000257147	321.781	3.71724e-05	303.089	0.000833341	323.959	6.28292e-05	312.498	8.33753e-05	317.986	5.69762e-05	347.652	9.84245e-05	326.411	4.97891e-05	307.591	0.00045738	331.858	0.000105275	297.8	0.000579976	311.046	0.000185483	305.001	0.000454846	307.918	5.77451e-05	297.8	0.000579976	311.046	0.000185483	301.746	0.00052078
291.882	0.00049059	323.95	2.85402e-05	335.971	4.33745e-05	308.206	6.22562e-05	299.55	0.000695668	338.825	2.69846e-06	317.728	7.72759e-05	349.902	2.30468e-05	311.925	0.000278675	322.079	4.03248e-05	303.373	0.000897117	324.254	6.82144e-05	312.799	9.03152e-05	318.289	6.18351e-05	347.935	0.000107027	326.699	5.39169e-05	307.879	0.000493227	332.123	0.00011345	298.111	0.000627704	311.349	0.000200996	305.29	0.000491353	308.206	6.22562e-05	298.111	0.000627704	311.349	0.000200996	302.049	0.000563445
292.182	0.00052855	324.234	3.08477e-05	336.255	4.70494e-05	308.493	6.70857e-05	299.838	0.000748228	339.104	2.8888e-06	318.014	8.34033e-05	350.159	2.50378e-05	312.221	0.000301843	322.377	4.37206e-05	303.656	0.000965299	324.549	7.40214e-05	313.099	9.77784e-05	318.591	6.70706e-05	348.218	0.000116327	326.987	5.83572e-05	308.168	0.00053161	332.388	0.000122208	298.421	0.000678957	311.652	0.000217682	305.58	0.000530523	308.493	6.70857e-05	298.421	0.000678957	311.652	0.000217682	302.353	0.000609267
292.482	0.000569139	324.517	3.33254e-05	336.538	5.10104e-05	308.78	7.22531e-05	300.126	0.000804347	339.383	3.09148e-06	318.299	8.99716e-05	350.416	2.71906e-05	312.517	0.000326761	322.674	4.73765e-05	303.94	0.00103815	324.845	8.02797e-05	313.4	0.0001058	318.893	7.27085e-05	348.501	0.000126375	327.275	6.31308e-05	308.456	0.000572687	332.652	0.000131586	298.732	0.000733957	311.955	0.000235621	305.869	0.000572528	308.78	7.22531e-05	298.732	0.000733957	311.955	0.000235621	302.656	0.00065845
292.782	0.000612513	324.801	3.59844e-05	336.822	5.52776e-05	309.068	7.77792e-05	300.414	0.000864234	339.661	3.30722e-06	318.584	9.70084e-05	350.673	2.95173e-05	312.813	0.000353546	322.972	5.13102e-05	304.224	0.00111595	325.14	8.70205e-05	313.7	0.000114415	319.196	7.8776e-05	348.784	0.000137225	327.563	6.82601e-05	308.745	0.000616622	332.917	0.000141623	299.042	0.000792942	312.258	0.000254894	306.159	0.000617548	309.068	7.77792e-05	299.042	0.000792942	312.258	0.000254894	302.96	0.000711207
293.082	0.000658836	325.084	3.88364e-05	337.106	5.9872e-05	309.355	8.36856e-05	300.702	0.000928106	339.94	3.53678e-06	318.87	0.000104543	350.93	3.2031e-05	313.11	0.000382321	323.27	5.55402e-05	304.507	0.001199	325.435	9.42767e-05	314.001	0.000123663	319.498	8.53019e-05	349.067	0.000148937	327.851	7.37684e-05	309.033	0.000663588	333.182	0.00015236	299.353	0.000856159	312.561	0.000275588	306.448	0.000665772	309.355	8.36856e-05	299.353	0.000856159	312.561	0.000275588	303.263	0.000767765
293.381	0.000708278	325.368	4.1894e-05	337.389	6.48162e-05	309.642	8.99948e-05	300.99	0.000996189	340.219	3.78093e-06	319.155	0.000112607	351.186	3.47455e-05	313.406	0.000413215	323.568	6.00862e-05	304.791	0.00128758	325.73	0.000102083	314.301	0.000133585	319.801	9.23165e-05	349.35	0.000161571	328.138	7.96805e-05	309.322	0.000713765	333.447	0.000163842	299.663	0.000923866	312.864	0.000297793	306.737	0.000717401	309.642	8.99948e-05	299.663	0.000923866	312.864	0.000297793	303.567	0.000828361
293.681	0.000761019	325.651	4.51701e-05	337.673	7.0134e-05	309.93	9.67306e-05	301.278	0.00106872	340.498	4.04053e-06	319.44	0.000121231	351.443	3.76757e-05	313.702	0.000446365	323.865	6.49689e-05	305.075	0.00138204	326.025	0.000110477	314.602	0.000144223	320.103	9.98518e-05	349.633	0.000175195	328.426	8.60225e-05	309.61	0.000767344	333.711	0.000176113	299.974	0.000996336	313.168	0.000321605	307.027	0.000772645	309.93	9.67306e-05	299.974	0.000996336	313.168	0.000321605	303.87	0.000893243
293.981	0.000817245	325.935	4.86784e-05	337.957	7.58505e-05	310.217	0.000103918	301.566	0.00114595	340.776	4.31645e-06	319.726	0.000130451	351.7	4.08376e-05	313.998	0.000481915	324.163	7.02101e-05	305.359	0.00148269	326.32	0.000119497	314.903	0.000155621	320.406	0.000107941	349.916	0.000189877	328.714	9.28219e-05	309.899	0.000824522	333.976	0.000189222	300.284	0.00107385	313.471	0.000347125	307.316	0.000831724	310.217	0.000103918	300.284	0.00107385	313.471	0.000347125	304.174	0.000962674
294.281	0.000877152	326.218	5.24335e-05	338.24	8.19923e-05	310.504	0.000111583	301.854	0.00122813	341.055	4.60959e-06	320.011	0.000140301	351.957	4.4248e-05	314.294	0.000520016	324.461	7.58327e-05	305.642	0.0015899	326.616	0.000129184	315.203	0.000167827	320.708	0.000116621	350.199	0.000205694	329.002	0.000100108	310.187	0.000885507	334.241	0.000203221	300.595	0.00115671	313.774	0.000374459	307.606	0.00089487	310.504	0.000111583	300.595	0.00115671	313.774	0.000374459	304.477	0.00103693
294.581	0.000940943	326.502	5.64506e-05	338.524	8.85877e-05	310.791	0.000119752	302.141	0.00131553	341.334	4.92092e-06	320.296	0.00015082	352.214	4.7925e-05	314.591	0.000560828	324.759	8.18611e-05	305.926	0.00170401	326.911	0.000139582	315.504	0.00018089	321.011	0.000125928	350.483	0.000222722	329.29	0.00010791	310.476	0.000950517	334.506	0.000218162	300.906	0.00124523	314.077	0.000403716	307.895	0.000962326	310.791	0.000119752	300.906	0.00124523	314.077	0.000403716	304.781	0.00111629
294.881	0.00100883	326.785	6.07456e-05	338.808	9.56662e-05	311.079	0.000128455	302.429	0.00140843	341.613	5.25145e-06	320.581	0.000162046	352.47	5.18879e-05	314.887	0.000604517	325.056	8.83206e-05	306.21	0.00182542	327.206	0.000150735	315.804	0.000194861	321.313	0.000135901	350.766	0.000241047	329.578	0.000116261	310.765	0.00101978	334.77	0.000234101	301.216	0.00133972	314.38	0.000435014	308.185	0.00103435	311.079	0.000128455	301.216	0.00133972	314.38	0.000435014	305.084	0.00120106
295.181	0.00108103	327.069	6.53352e-05	339.091	0.000103259	311.366	0.00013772	302.717	0.00150713	341.891	5.60223e-06	320.867	0.00017402	352.727	5.61571e-05	315.183	0.000651259	325.354	9.52379e-05	306.494	0.00195452	327.501	0.000162693	316.105	0.000209795	321.616	0.000146582	351.049	0.000260758	329.866	0.000125195	311.053	0.00109352	335.035	0.000251098	301.527	0.00144052	314.683	0.000468473	308.474	0.0011112	311.366	0.00013772	301.527	0.00144052	314.683	0.000468473	305.388	0.00129155
295.48	0.00115777	327.352	7.02372e-05	339.375	0.0001114	311.653	0.000147579	303.005	0.00161191	342.17	5.97436e-06	321.152	0.000186786	352.984	6.07544e-05	315.479	0.000701238	325.652	0.000102641	306.777	0.00209172	327.796	0.000175505	316.405	0.000225748	321.918	0.000158013	351.332	0.000281947	330.154	0.000134746	311.342	0.001172	335.3	0.000269214	301.837	0.00154799	314.986	0.000504221	308.763	0.00119316	311.653	0.000147579	301.837	0.00154799	314.986	0.000504221	305.691	0.00138809
295.78	0.0012393	327.636	7.547e-05	339.659	0.000120122	311.941	0.000158063	303.293	0.00172311	342.449	6.369e-06	321.437	0.000200387	353.241	6.57032e-05	315.776	0.000754645	325.95	0.000110559	307.061	0.00223745	328.092	0.000189225	316.706	0.000242779	322.221	0.00017024	351.615	0.000304716	330.442	0.000144952	311.63	0.00125547	335.565	0.000288513	302.148	0.00166249	315.289	0.00054239	309.053	0.00128052	311.941	0.000158063	302.148	0.00166249	315.289	0.00054239	305.995	0.00149102
296.08	0.00132585	327.919	8.10527e-05	339.943	0.000129464	312.228	0.000169207	303.581	0.00184103	342.728	6.78734e-06	321.723	0.000214871	353.498	7.10279e-05	316.072	0.000811684	326.247	0.000119024	307.345	0.00239216	328.387	0.000203908	317.006	0.000260951	322.523	0.000183311	351.898	0.000329169	330.73	0.000155852	311.919	0.0013442	335.829	0.000309064	302.458	0.0017844	315.592	0.000583118	309.342	0.00137359	312.228	0.000169207	302.458	0.0017844	315.592	0.000583118	306.298	0.0016007
296.38	0.00141769	328.202	8.70058e-05	340.226	0.000139463	312.515	0.000181045	303.869	0.00196601	343.006	7.23066e-06	322.008	0.000230287	353.754	7.6755e-05	316.368	0.000872563	326.545	0.000128067	307.628	0.0025563	328.682	0.000219613	317.307	0.000280327	322.825	0.000197274	352.181	0.000355418	331.018	0.000167485	312.207	0.00143846	336.094	0.000330938	302.769	0.00191411	315.896	0.000626551	309.632	0.00147268	312.515	0.000181045	302.769	0.00191411	315.896	0.000626551	306.602	0.0017175
296.68	0.00151508	328.486	9.33503e-05	340.51	0.00015016	312.803	0.000193613	304.157	0.00209841	343.285	7.70026e-06	322.293	0.000246684	354.011	8.29124e-05	316.664	0.000937504	326.843	0.000137722	307.912	0.00273037	328.977	0.000236401	317.607	0.000300975	323.128	0.000212183	352.464	0.000383582	331.306	0.000179895	312.496	0.00153854	336.359	0.000354208	303.079	0.00205203	316.199	0.000672839	309.921	0.00157813	312.803	0.000193613	303.079	0.00205203	316.199	0.000672839	306.905	0.00184181
296.98	0.00161829	328.769	0.000100108	340.794	0.000161598	313.09	0.000206948	304.445	0.00223859	343.564	8.19752e-06	322.579	0.000264117	354.268	8.95295e-05	316.961	0.00100674	327.141	0.000148024	308.196	0.00291486	329.272	0.000254336	317.908	0.000322964	323.43	0.000228089	352.747	0.000413784	331.594	0.000193126	312.784	0.00164475	336.624	0.000378953	303.39	0.00219858	316.502	0.000722139	310.211	0.00169028	313.09	0.000206948	303.39	0.00219858	316.502	0.000722139	307.209	0.00197402
297.28	0.00172761	329.053	0.000107303	341.077	0.000173821	313.377	0.000221091	304.733	0.0023869	343.843	8.72387e-06	322.864	0.000282639	354.525	9.66379e-05	317.257	0.0010805	327.438	0.000159011	308.48	0.00311029	329.567	0.000273485	318.208	0.000346368	323.733	0.000245051	353.03	0.000446156	331.882	0.000207224	313.073	0.00175738	336.888	0.000405254	303.7	0.00235419	316.805	0.000774613	310.5	0.00180948	313.377	0.000221091	303.7	0.00235419	316.805	0.000774613	307.512	0.00211456
297.579	0.00184332	329.336	0.000114958	341.361	0.000186876	313.664	0.00023608	305.021	0.00254375	344.121	9.2808e-06	323.149	0.00030231	354.782	0.000104271	317.553	0.00115904	327.736	0.00017072	308.763	0.00331719	329.863	0.000293918	318.509	0.000371262	324.035	0.000263127	353.313	0.000480838	332.17	0.000222238	313.361	0.00187677	337.153	0.000433194	304.011	0.00251933	317.108	0.000830432	310.789	0.00193612	313.664	0.00023608	304.011	0.00251933	317.108	0.000830432	307.816	0.00226385
297.879	0.00196574	329.62	0.000123099	341.645	0.000200811	313.952	0.000251958	305.309	0.00270951	344.4	9.86989e-06	323.435	0.000323186	355.038	0.000112464	317.849	0.00124262	328.034	0.000183192	309.047	0.00353611	330.158	0.000315709	318.81	0.000397724	324.338	0.000282379	353.596	0.000517974	332.458	0.000238219	313.65	0.00200325	337.418	0.000462864	304.321	0.00269444	317.411	0.00088977	311.079	0.00207059	313.952	0.000251958	304.321	0.00269444	317.411	0.00088977	308.119	0.00242235
298.179	0.00209516	329.903	0.000131752	341.928	0.00021568	314.239	0.000268768	305.597	0.00288461	344.679	1.04927e-05	323.72	0.000345332	355.295	0.000121255	318.145	0.00133152	328.332	0.000196469	309.331	0.00376763	330.453	0.000338934	319.11	0.000425837	324.64	0.000302869	353.879	0.000557721	332.746	0.000255218	313.938	0.00213716	337.682	0.000494355	304.632	0.00288002	317.714	0.00095281	311.368	0.00221328	314.239	0.000268768	304.632	0.00288002	317.714	0.00095281	308.422	0.00259052
298.479	0.00223192	330.187	0.000140944	342.212	0.000231534	314.526	0.000286555	305.884	0.00306945	344.957	1.11511e-05	324.005	0.00036881	355.552	0.000130683	318.442	0.001426	328.63	0.000210593	309.614	0.00401234	330.748	0.000363673	319.411	0.000455684	324.943	0.000324664	354.163	0.000600239	333.034	0.000273291	314.227	0.00227885	337.947	0.000527763	304.942	0.00307655	318.017	0.00101974	311.658	0.00236461	314.526	0.000286555	304.942	0.00307655	318.017	0.00101974	308.726	0.00276884
298.779	0.00237635	330.47	0.000150703	342.496	0.000248431	314.814	0.000305365	306.172	0.00326447	345.236	1.18466e-05	324.29	0.000393686	355.809	0.00014079	318.738	0.00152637	328.927	0.00022561	309.898	0.00427084	331.043	0.000390009	319.711	0.000487353	325.245	0.000347833	354.446	0.0006457	333.322	0.000292494	314.515	0.0024287	338.212	0.000563189	305.253	0.00328454	318.32	0.00109076	311.947	0.00252502	314.814	0.000305365	305.253	0.00328454	318.32	0.00109076	309.029	0.00295781
299.079	0.00252877	330.754	0.000161059	342.78	0.000266429	315.101	0.000325245	306.46	0.00347011	345.515	1.25812e-05	324.576	0.00042003	356.066	0.000151621	319.034	0.00163293	329.225	0.000241567	310.182	0.00454377	331.338	0.000418028	320.012	0.000520935	325.548	0.000372448	354.729	0.000694284	333.61	0.000312887	314.804	0.00258707	338.477	0.000600736	305.563	0.00350451	318.624	0.00116606	312.237	0.00269496	315.101	0.000325245	305.563	0.00350451	318.624	0.00116606	309.333	0.00315794
299.379	0.00268954	331.037	0.000172042	343.063	0.00028559	315.388	0.000346244	306.748	0.00368682	345.794	1.33567e-05	324.861	0.000447912	356.323	0.000163223	319.33	0.00174598	329.523	0.000258512	310.466	0.00483176	331.634	0.00044782	320.312	0.000556523	325.85	0.000398581	355.012	0.00074618	333.898	0.000334532	315.092	0.00275437	338.741	0.000640513	305.874	0.00373699	318.927	0.00124586	312.526	0.0028749	315.388	0.000346244	305.874	0.00373699	318.927	0.00124586	309.636	0.00336975
299.678	0.00285902	331.321	0.000183685	343.347	0.000305977	315.676	0.000368413	307.036	0.00391506	346.072	1.41752e-05	325.146	0.000477405	356.579	0.000175645	319.627	0.00186585	329.821	0.000276496	310.749	0.00513549	331.929	0.00047948	320.613	0.000594213	326.153	0.00042631	355.295	0.000801585	334.186	0.000357491	315.381	0.00293098	339.006	0.000682633	306.184	0.00398253	319.23	0.00133038	312.815	0.00306531	315.676	0.000368413	306.184	0.00398253	319.23	0.00133038	309.94	0.0035938
299.978	0.00303757	331.604	0.000196018	343.631	0.000327658	315.963	0.000391804	307.324	0.00415531	346.351	1.50386e-05	325.432	0.000508585	356.836	0.000188941	319.923	0.00199288	330.118	0.000295571	311.033	0.00545563	332.224	0.000513103	320.913	0.000634104	326.455	0.000455714	355.578	0.00086071	334.474	0.000381831	315.669	0.00311733	339.271	0.000727212	306.495	0.00424168	319.533	0.00141982	313.105	0.00326668	315.963	0.000391804	306.495	0.00424168	319.533	0.00141982	310.243	0.00383065
300.278	0.00322557	331.888	0.000209078	343.914	0.000350701	316.25	0.00041647	307.612	0.00440806	346.63	1.59492e-05	325.717	0.00054153	357.093	0.000203166	320.219	0.00212742	330.416	0.00031579	311.317	0.00579288	332.519	0.00054879	321.214	0.0006763	326.757	0.000486875	355.861	0.000923772	334.762	0.000407621	315.958	0.00331383	339.536	0.000774372	306.805	0.004515	319.836	0.00151443	313.394	0.00347954	316.25	0.00041647	306.805	0.004515	319.836	0.00151443	310.547	0.00408086
300.578	0.00342339	332.171	0.000222898	344.198	0.000375179	316.537	0.000442465	307.9	0.00467378	346.909	1.69092e-05	326.002	0.00057632	357.35	0.000218378	320.515	0.00226981	330.714	0.00033721	311.6	0.00614796	332.814	0.000586645	321.514	0.000720905	327.06	0.000519876	356.144	0.000991001	335.05	0.000434931	316.246	0.00352092	339.8	0.000824238	307.116	0.00480309	320.139	0.00161442	313.684	0.00370441	316.537	0.000442465	307.116	0.00480309	320.139	0.00161442	310.85	0.00434504
300.878	0.00363143	332.455	0.000237516	344.482	0.000401166	316.825	0.000469846	308.188	0.004953	347.187	1.79207e-05	326.288	0.000613038	357.607	0.000234639	320.812	0.00242044	331.012	0.000359889	311.884	0.0065216	333.11	0.000626777	321.815	0.000768027	327.362	0.000554804	356.427	0.00106264	335.338	0.000463834	316.535	0.00373905	340.065	0.000876942	307.426	0.00510652	320.442	0.00172006	313.973	0.00394184	316.825	0.000469846	307.426	0.00510652	320.442	0.00172006	311.154	0.00462379
301.178	0.00385008	332.738	0.000252968	344.765	0.000428742	317.112	0.00049867	308.476	0.00524622	347.466	1.89863e-05	326.573	0.000651768	357.863	0.000252015	321.108	0.00257966	331.309	0.000383885	312.168	0.00691456	333.405	0.000669296	322.115	0.000817777	327.665	0.000591751	356.71	0.00113893	335.626	0.000494406	316.824	0.00396865	340.33	0.000932619	307.737	0.0054259	320.745	0.00183157	314.263	0.00419237	317.112	0.00049867	307.737	0.0054259	320.745	0.00183157	311.457	0.00491773
301.478	0.00407976	333.022	0.000269294	345.049	0.000457986	317.399	0.000528995	308.764	0.00555396	347.745	2.01084e-05	326.858	0.000692597	358.12	0.000270573	321.404	0.00274789	331.607	0.000409259	312.452	0.00732759	333.7	0.000714318	322.416	0.00087027	327.967	0.000630806	356.993	0.00122015	335.914	0.000526725	317.112	0.00421021	340.595	0.000991407	308.048	0.00576183	321.048	0.00194921	314.552	0.0044566	317.399	0.000528995	308.048	0.00576183	321.048	0.00194921	311.761	0.00522749
301.777	0.00432088	333.305	0.000286532	345.333	0.000488984	317.687	0.000560881	309.052	0.00587675	348.024	2.12896e-05	327.143	0.000735615	358.377	0.000290388	321.7	0.00292551	331.905	0.000436075	312.735	0.00776149	333.995	0.000761961	322.716	0.000925621	328.27	0.000672066	357.276	0.00130657	336.202	0.000560871	317.401	0.0044642	340.859	0.00105345	308.358	0.00611492	321.352	0.00207324	314.841	0.00473509	317.687	0.000560881	308.358	0.00611492	321.352	0.00207324	312.064	0.00555373
302.077	0.00457384	333.589	0.000304725	345.616	0.00052182	317.974	0.000594391	309.34	0.00621513	348.302	2.25324e-05	327.429	0.000780913	358.634	0.000311534	321.996	0.00311293	332.203	0.000464398	313.019	0.00821706	334.29	0.000812348	323.017	0.000983949	328.572	0.000715626	357.559	0.00139847	336.49	0.000596926	317.689	0.00473109	341.124	0.0011189	308.669	0.0064858	321.655	0.00220393	315.131	0.00502847	317.974	0.000594391	308.669	0.0064858	321.655	0.00220393	312.368	0.00589711
302.377	0.00483909	333.872	0.000323914	345.9	0.000556587	318.261	0.000629585	309.628	0.00656963	348.581	2.38397e-05	327.714	0.000828585	358.891	0.000334092	322.293	0.00331058	332.5	0.000494293	313.303	0.00869509	334.585	0.000865605	323.318	0.00104538	328.875	0.000761588	357.842	0.00149616	336.778	0.000634976	317.978	0.00501138	341.389	0.00118791	308.979	0.00687509	321.958	0.00234154	315.42	0.00533735	318.261	0.000629585	308.979	0.00687509	321.958	0.00234154	312.671	0.00625831
302.677	0.00511705	334.155	0.000344143	346.184	0.000593376	318.549	0.000666527	309.915	0.00694081	348.86	2.52142e-05	327.999	0.000878726	359.147	0.000358146	322.589	0.00351889	332.798	0.000525829	313.587	0.00919643	334.881	0.000921861	323.618	0.00111003	329.177	0.000810052	358.126	0.00159995	337.066	0.000675107	318.266	0.00530557	341.654	0.00126064	309.29	0.00728341	322.261	0.00248634	315.71	0.00566236	318.549	0.000666527	309.29	0.00728341	322.261	0.00248634	312.975	0.006638
302.977	0.00540816	334.439	0.000365456	346.468	0.000632283	318.836	0.000705282	310.203	0.00732923	349.139	2.6659e-05	328.285	0.000931434	359.404	0.000383784	322.885	0.00373829	333.096	0.000559076	313.87	0.0097219	335.176	0.000981249	323.919	0.00117803	329.48	0.000861123	358.409	0.00171017	337.354	0.000717409	318.555	0.00561416	341.918	0.00133726	309.6	0.0077114	322.564	0.00263861	315.999	0.00600414	318.836	0.000705282	309.6	0.0077114	322.564	0.00263861	313.278	0.0070369
303.277	0.00571285	334.722	0.0003879	346.751	0.000673409	319.123	0.000745915	310.491	0.00773542	349.417	2.8177e-05	328.57	0.000986809	359.661	0.000411101	323.181	0.00396923	333.394	0.000594106	314.154	0.0102724	335.471	0.00104391	324.219	0.00124951	329.782	0.000914908	358.692	0.00182716	337.642	0.000761975	318.843	0.00593768	342.183	0.00141792	309.911	0.0081597	322.867	0.00279863	316.289	0.00636337	319.123	0.000745915	309.911	0.0081597	322.867	0.00279863	313.582	0.00745571
303.577	0.00603159	335.006	0.00041152	347.035	0.000716855	319.41	0.000788493	310.779	0.00815996	349.696	2.97714e-05	328.855	0.00104495	359.918	0.000440192	323.478	0.00421217	333.691	0.00063099	314.438	0.0108487	335.766	0.00110997	324.52	0.00132459	330.085	0.000971515	358.975	0.00195128	337.93	0.000808897	319.132	0.00627664	342.448	0.00150281	310.221	0.00862893	323.17	0.00296669	316.578	0.0067407	319.41	0.000788493	310.221	0.00862893	323.17	0.00296669	313.885	0.00789515
303.876	0.00636481	335.289	0.000436364	347.319	0.000762726	319.698	0.000833082	311.067	0.00860341	349.975	3.14453e-05	329.141	0.00110597	360.175	0.000471162	323.774	0.00446758	333.989	0.000669805	314.721	0.0114517	336.061	0.00117959	324.82	0.00140342	330.387	0.00103105	359.258	0.0020829	338.218	0.000858272	319.42	0.00663158	342.713	0.00159211	310.532	0.00911972	323.473	0.00314309	316.867	0.00713684	319.698	0.000833082	310.532	0.00911972	323.473	0.00314309	314.189	0.00835595
304.176	0.00671296	335.573	0.000462482	347.602	0.000811131	319.985	0.000879751	311.355	0.00906633	350.254	3.32022e-05	329.426	0.00116996	360.431	0.000504117	324.07	0.00473593	334.287	0.000710626	315.005	0.0120823	336.356	0.00125291	325.121	0.00148612	330.689	0.00109364	359.541	0.00222241	338.506	0.000910198	319.709	0.00700301	342.977	0.00168599	310.842	0.0096327	323.776	0.0033281	317.157	0.00755246	319.985	0.000879751	310.842	0.0096327	323.776	0.0033281	314.492	0.00883884
304.476	0.00707652	335.856	0.000489924	347.886	0.000862181	320.272	0.000928567	311.643	0.00954928	350.532	3.50455e-05	329.711	0.00123703	360.688	0.00053917	324.366	0.00501769	334.585	0.000753531	315.289	0.0127414	336.652	0.00133007	325.421	0.00157283	330.992	0.00115939	359.824	0.0023702	338.794	0.000964775	319.997	0.00739149	343.242	0.00178465	311.153	0.0101685	324.08	0.00352203	317.446	0.00798829	320.272	0.000928567	311.153	0.0101685	324.08	0.00352203	314.796	0.00934456
304.776	0.00745592	336.14	0.000518739	348.17	0.00091599	320.56	0.0009796	311.931	0.0100528	350.811	3.69787e-05	329.997	0.00130729	360.945	0.000576439	324.663	0.00531336	334.882	0.000798598	315.573	0.0134299	336.947	0.00141124	325.722	0.00166369	331.294	0.00122841	360.107	0.0025267	339.082	0.00102211	320.286	0.00779754	343.507	0.00188828	311.463	0.0107277	324.383	0.00372517	317.736	0.00844503	320.56	0.0009796	311.463	0.0107277	324.383	0.00372517	315.099	0.00987386
305.076	0.00785164	336.423	0.000548981	348.453	0.000972677	320.847	0.00103292	312.219	0.0105775	351.09	3.90054e-05	330.282	0.00138085	361.202	0.000616047	324.959	0.00562342	335.18	0.000845908	315.856	0.0141486	337.242	0.00149656	326.022	0.00175883	331.597	0.00130083	360.39	0.00269234	339.37	0.00108229	320.574	0.00822172	343.772	0.00199707	311.774	0.011311	324.686	0.00393782	318.025	0.00892342	320.847	0.00103292	311.774	0.011311	324.686	0.00393782	315.403	0.0104275
305.376	0.00826412	336.707	0.000580702	348.737	0.00103236	321.134	0.0010886	312.507	0.0111239	351.369	4.11295e-05	330.567	0.00145781	361.459	0.000658124	325.255	0.00594838	335.478	0.000895541	316.14	0.0148985	337.537	0.00158619	326.323	0.0018584	331.899	0.00137676	360.673	0.00286756	339.658	0.00114544	320.863	0.00866456	344.036	0.00211123	312.084	0.0119189	324.989	0.00416029	318.315	0.00942418	321.134	0.0010886	312.084	0.0119189	324.989	0.00416029	315.706	0.0110062
305.676	0.00869382	336.99	0.000613955	349.021	0.00109516	321.422	0.0011467	312.795	0.0116926	351.647	4.33549e-05	330.852	0.0015383	361.715	0.000702804	325.551	0.00628873	335.776	0.000947582	316.424	0.0156805	337.832	0.0016803	326.623	0.00196252	332.202	0.00145633	360.956	0.00305285	339.946	0.00121166	321.151	0.00912662	344.301	0.00223097	312.395	0.012552	325.292	0.00439286	318.604	0.00994806	321.422	0.0011467	312.395	0.012552	325.292	0.00439286	316.01	0.0116108
305.975	0.00914121	337.274	0.000648795	349.305	0.00116121	321.709	0.0012073	313.083	0.012284	351.926	4.56854e-05	331.138	0.00162241	361.972	0.000750229	325.847	0.00664498	336.073	0.00100211	316.707	0.0164955	338.127	0.00177905	326.924	0.00207136	332.504	0.00153965	361.239	0.00324867	340.234	0.00128106	321.44	0.00960842	344.566	0.0023565	312.705	0.0132109	325.595	0.00463585	318.894	0.0104958	321.709	0.0012073	312.705	0.0132109	325.595	0.00463585	316.313	0.0122419
306.275	0.00960674	337.557	0.000685277	349.588	0.00123064	321.996	0.00127046	313.371	0.0128988	352.205	4.81254e-05	331.423	0.00171027	362.229	0.000800547	326.144	0.00701764	336.371	0.00105922	316.991	0.0173443	338.423	0.0018826	327.224	0.00218503	332.807	0.00162686	361.522	0.00345554	340.522	0.00135374	321.728	0.0101105	344.831	0.00248803	313.016	0.0138961	325.898	0.00488955	319.183	0.0110682	321.996	0.00127046	313.016	0.0138961	325.898	0.00488955	316.617	0.0129004
306.575	0.0100909	337.841	0.000723456	349.872	0.00130357	322.283	0.00133626	313.658	0.0135375	352.484	5.06788e-05	331.708	0.00180198	362.486	0.00085391	326.44	0.00740721	336.669	0.00111898	317.275	0.0182278	338.718	0.00199112	327.525	0.00230368	333.109	0.00171807	361.806	0.00367397	340.81	0.00142983	322.017	0.0106335	345.095	0.00262578	313.326	0.0146081	326.201	0.00515426	319.472	0.0116659	322.283	0.00133626	313.326	0.0146081	326.201	0.00515426	316.92	0.013587
306.875	0.010594	338.124	0.00076339	350.156	0.00138014	322.571	0.00140476	313.946	0.0142005	352.762	5.33503e-05	331.994	0.00189766	362.743	0.00091048	326.736	0.0078142	336.967	0.00118149	317.559	0.019147	339.013	0.00210478	327.826	0.00242746	333.412	0.0018134	362.089	0.00390451	341.098	0.00150942	322.305	0.0111778	345.36	0.00276998	313.637	0.0153476	326.504	0.00543027	319.762	0.0122897	322.571	0.00140476	313.637	0.0153476	326.504	0.00543027	317.224	0.0143024
307.175	0.0111166	338.408	0.000805133	350.439	0.00146048	322.858	0.00147604	314.234	0.0148884	353.041	5.61441e-05	332.279	0.00199741	362.999	0.000970425	327.032	0.00823913	337.264	0.00124683	317.842	0.0201028	339.308	0.00222375	328.126	0.00255649	333.714	0.00191299	362.372	0.0041477	341.386	0.00159264	322.594	0.011744	345.625	0.00292086	313.947	0.0161149	326.808	0.00571788	320.051	0.0129405	322.858	0.00147604	313.947	0.0161149	326.808	0.00571788	317.527	0.0150474
307.475	0.0116592	338.691	0.000848745	350.723	0.00154473	323.145	0.00155016	314.522	0.0156016	353.32	5.9065e-05	332.564	0.00210135	363.256	0.00103392	327.329	0.00868249	337.562	0.00131509	318.126	0.0210959	339.603	0.0023482	328.427	0.00269093	334.017	0.00201696	362.655	0.00440413	341.674	0.0016796	322.883	0.0123326	345.89	0.00307865	314.258	0.0169105	327.111	0.00601737	320.341	0.0136188	323.145	0.00155016	314.258	0.0169105	327.111	0.00601737	317.831	0.0158227
307.775	0.0122221	338.975	0.000894281	351.007	0.00163304	323.433	0.00162719	314.81	0.0163407	353.599	6.21177e-05	332.85	0.0022096	363.513	0.00110114	327.625	0.00914479	337.86	0.00138635	318.41	0.0221273	339.899	0.00247829	328.727	0.00283089	334.319	0.00212543	362.938	0.00467439	341.962	0.0017704	323.171	0.0129442	346.154	0.00324358	314.568	0.0177348	327.414	0.00632903	320.63	0.0143256	323.433	0.00162719	314.568	0.0177348	327.414	0.00632903	318.134	0.016629
308.074	0.0128057	339.258	0.000941801	351.29	0.00172555	323.72	0.0017072	315.098	0.0171061	353.877	6.5307e-05	333.135	0.00232226	363.77	0.00117228	327.921	0.00962653	338.158	0.00146071	318.693	0.0231977	340.194	0.00261422	329.028	0.00297653	334.621	0.00223854	363.221	0.00495909	342.25	0.00186518	323.46	0.0135792	346.419	0.00341589	314.879	0.0185883	327.717	0.00665315	320.92	0.0150615	323.72	0.0017072	314.879	0.0185883	327.717	0.00665315	318.438	0.017467
308.374	0.0134106	339.542	0.000991361	351.574	0.00182239	324.007	0.00179024	315.386	0.0178982	354.156	6.86379e-05	333.42	0.00243943	364.027	0.00124754	328.217	0.0101282	338.455	0.00153824	318.977	0.0243081	340.489	0.00275614	329.328	0.00312796	334.924	0.00235639	363.504	0.00525887	342.538	0.00196403	323.748	0.0142382	346.684	0.00359583	315.19	0.0194713	328.02	0.00698998	321.209	0.0158273	324.007	0.00179024	315.19	0.0194713	328.02	0.00698998	318.741	0.0183375
308.674	0.014037	339.825	0.00104302	351.858	0.00192371	324.295	0.0018764	315.674	0.0187174	354.435	7.21157e-05	333.706	0.00256124	364.283	0.00132711	328.514	0.0106503	338.753	0.00161905	319.261	0.0254591	340.784	0.00290422	329.629	0.00328533	335.226	0.00247912	363.787	0.00557437	342.826	0.00206708	324.037	0.0149216	346.949	0.00378364	315.5	0.0203842	328.323	0.0073398	321.498	0.0166237	324.295	0.0018764	315.5	0.0203842	328.323	0.0073398	319.045	0.0192409
308.974	0.0146855	340.109	0.00109683	352.141	0.00202966	324.582	0.00196571	315.962	0.0195641	354.713	7.57456e-05	333.991	0.00268778	364.54	0.00141122	328.81	0.0111933	339.051	0.0017032	319.545	0.0266517	341.079	0.00305866	329.929	0.00344875	335.529	0.00260686	364.07	0.00590628	343.114	0.00217444	324.325	0.0156298	347.213	0.00397956	315.811	0.0213272	328.626	0.00770287	321.788	0.0174515	324.582	0.00196571	315.811	0.0213272	328.626	0.00770287	319.348	0.0201782
309.274	0.0153562	340.392	0.00115286	352.425	0.00214039	324.869	0.00205826	316.25	0.0204387	354.992	7.9533e-05	334.276	0.00281915	364.797	0.00150008	329.106	0.0117576	339.349	0.0017908	319.828	0.0278865	341.374	0.0032196	330.23	0.00361835	335.831	0.00273972	364.353	0.00625528	343.402	0.00228622	324.614	0.0163634	347.478	0.00418385	316.121	0.0223005	328.929	0.00807944	322.077	0.0183113	324.869	0.00205826	316.121	0.0223005	328.929	0.00807944	319.652	0.0211497
309.574	0.0160498	340.675	0.00121116	352.709	0.00225605	325.157	0.00215409	316.538	0.0213415	355.271	8.34835e-05	334.561	0.00295547	365.054	0.00159392	329.402	0.0123438	339.646	0.00188192	320.112	0.0291643	341.67	0.00338723	330.53	0.00379426	336.134	0.00287782	364.636	0.00662208	343.69	0.00240254	324.902	0.0171228	347.743	0.00439676	316.432	0.0233044	329.232	0.00846974	322.367	0.0192039	325.157	0.00215409	316.432	0.0233044	329.232	0.00846974	319.955	0.0221563
309.874	0.0167664	340.959	0.00127179	352.993	0.00237677	325.444	0.00225326	316.826	0.0222728	355.55	8.7603e-05	334.847	0.00309682	365.311	0.00169297	329.698	0.0129522	339.944	0.00197665	320.396	0.0304857	341.965	0.00356171	330.831	0.0039766	336.436	0.00302129	364.919	0.00700742	343.978	0.0025235	325.191	0.0179084	348.008	0.00461855	316.742	0.0243391	329.536	0.00887402	322.656	0.02013	325.444	0.00225326	316.742	0.0243391	329.536	0.00887402	320.259	0.0231984
310.173	0.0175065	341.242	0.0013348	353.276	0.00250272	325.731	0.00235583	317.114	0.0232329	355.828	9.18972e-05	335.132	0.00324331	365.567	0.00179749	329.995	0.0135833	340.242	0.00207508	320.68	0.0318516	342.26	0.00374321	331.131	0.00416546	336.739	0.00317025	365.202	0.00741205	344.266	0.00264922	325.479	0.0187205	348.272	0.00484945	317.053	0.0254046	329.839	0.00929248	322.946	0.0210902	325.731	0.00235583	317.053	0.0254046	329.839	0.00929248	320.562	0.0242765
310.473	0.0182704	341.526	0.00140025	353.56	0.00263404	326.018	0.00246184	317.402	0.0242221	356.107	9.63723e-05	335.417	0.00339503	365.824	0.00190772	330.291	0.0142376	340.54	0.00217728	320.963	0.0332623	342.555	0.00393189	331.432	0.00436097	337.041	0.00332481	365.485	0.00783674	344.554	0.0027798	325.768	0.0195596	348.537	0.00508974	317.363	0.026501	330.142	0.00972535	323.235	0.0220851	326.018	0.00246184	317.363	0.026501	330.142	0.00972535	320.866	0.0253913
310.773	0.0190583	341.809	0.00146819	353.844	0.00277088	326.306	0.00257136	317.689	0.0252404	356.386	0.000101034	335.703	0.00355206	366.081	0.00202393	330.587	0.0149153	340.837	0.00228335	321.247	0.0347187	342.85	0.00412792	331.732	0.00456323	337.344	0.00348508	365.769	0.00828229	344.842	0.00291536	326.056	0.0204261	348.802	0.00533967	317.674	0.0276284	330.445	0.0101728	323.524	0.0231154	326.306	0.00257136	317.674	0.0276284	330.445	0.0101728	321.169	0.0265432
311.073	0.0198706	342.093	0.00153868	354.127	0.00291339	326.593	0.00268441	317.977	0.0262882	356.665	0.00010589	335.988	0.00371449	366.338	0.0021464	330.883	0.0156169	341.135	0.00239336	321.531	0.0362212	343.145	0.00433145	332.033	0.00477234	337.646	0.00365119	366.052	0.00874951	345.13	0.00305599	326.345	0.0213201	349.067	0.00559949	317.984	0.0287866	330.748	0.010635	323.814	0.0241818	326.593	0.00268441	317.984	0.0287866	330.748	0.010635	321.473	0.0277326
311.373	0.0207076	342.376	0.00161176	354.411	0.00306171	326.88	0.00280105	318.265	0.0273655	356.943	0.000110946	336.273	0.0038824	366.595	0.00227539	331.18	0.0163427	341.433	0.00250739	321.814	0.0377703	343.441	0.00454264	332.334	0.00498839	337.949	0.00382324	366.335	0.00923924	345.418	0.0032018	326.633	0.0222422	349.331	0.00586946	318.295	0.0299755	331.051	0.0111122	324.103	0.0252847	326.88	0.00280105	318.295	0.0299755	331.051	0.0111122	321.776	0.02896
311.673	0.0215695	342.66	0.0016875	354.695	0.003216	327.168	0.00292131	318.553	0.0284725	357.222	0.000116209	336.559	0.00405587	366.851	0.0024112	331.476	0.0170931	341.731	0.00262551	322.098	0.0393666	343.736	0.00476164	332.634	0.00521147	338.251	0.00400134	366.618	0.00975232	345.706	0.00335289	326.922	0.0231924	349.596	0.00614984	318.605	0.0311951	331.354	0.0116045	324.393	0.0264247	327.168	0.00292131	318.605	0.0311951	331.354	0.0116045	322.08	0.0302258
311.973	0.0224566	342.943	0.00176593	354.978	0.00337638	327.455	0.00304524	318.841	0.0296091	357.501	0.000121686	336.844	0.00423497	367.108	0.00255413	331.772	0.0178684	342.028	0.00274782	322.382	0.0410103	344.031	0.0049886	332.935	0.00544167	338.553	0.00418559	366.901	0.0102896	345.994	0.00350935	327.21	0.024171	349.861	0.00644087	318.916	0.032445	331.657	0.012112	324.682	0.0276024	327.455	0.00304524	318.916	0.032445	331.657	0.012112	322.383	0.0315302
312.272	0.023369	343.227	0.00184711	355.262	0.00354302	327.742	0.00317285	319.129	0.0307754	357.78	0.000127384	337.129	0.00441976	367.365	0.00270448	332.068	0.0186688	342.326	0.00287437	322.666	0.042702	344.326	0.00522366	333.235	0.00567906	338.856	0.00437611	367.184	0.0108521	346.281	0.00367128	327.499	0.0251783	350.126	0.00674281	319.226	0.0337249	331.961	0.0126348	324.972	0.0288181	327.742	0.00317285	319.226	0.0337249	331.961	0.0126348	322.687	0.0328736
312.572	0.0243071	343.51	0.00193109	355.546	0.00371603	328.03	0.00330418	319.417	0.0319714	358.058	0.000133311	337.414	0.0046103	367.622	0.00286258	332.365	0.0194946	342.624	0.00300524	322.949	0.0444418	344.621	0.00546694	333.536	0.00592372	339.158	0.00457299	367.467	0.0114406	346.569	0.00383876	327.787	0.0262144	350.39	0.00705591	319.537	0.0350346	332.264	0.0131731	325.261	0.0300725	328.03	0.00330418	319.537	0.0350346	332.264	0.0131731	322.99	0.0342563
312.872	0.0252709	343.794	0.00201789	355.83	0.00389558	328.317	0.00343926	319.705	0.0331969	358.337	0.000139475	337.7	0.00480664	367.879	0.00302875	332.661	0.0203461	342.922	0.00314051	323.233	0.0462301	344.917	0.0057186	333.836	0.0061757	339.461	0.00477633	367.75	0.012056	346.857	0.00401189	328.076	0.0272795	350.655	0.00738042	319.847	0.0363735	332.567	0.0137269	325.55	0.0313658	328.317	0.00343926	319.847	0.0363735	332.567	0.0137269	323.294	0.0356783
313.172	0.0262606	344.077	0.00210758	356.113	0.00408177	328.604	0.0035781	319.993	0.0344519	358.616	0.000145883	337.985	0.00500884	368.135	0.00320332	332.957	0.0212233	343.219	0.00328024	323.517	0.048067	345.212	0.00597874	334.137	0.00643506	339.763	0.00498623	368.033	0.0126994	347.145	0.00419074	328.364	0.0283736	350.92	0.00771658	320.158	0.0377412	332.87	0.0142964	325.84	0.0326985	328.604	0.0035781	320.158	0.0377412	332.87	0.0142964	323.597	0.0371399
313.472	0.0272763	344.361	0.00220018	356.397	0.00427476	328.891	0.00372072	320.281	0.035736	358.895	0.000152544	338.27	0.00521693	368.392	0.00338665	333.253	0.0221265	343.517	0.0034245	323.8	0.0499527	345.507	0.00624748	334.437	0.00670186	340.066	0.00520277	368.316	0.0133717	347.433	0.00437538	328.653	0.0294969	351.185	0.00806463	320.468	0.0391371	333.173	0.0148815	326.129	0.0340708	328.891	0.00372072	320.468	0.0391371	333.173	0.0148815	323.901	0.0386411
313.772	0.0283182	344.644	0.00229573	356.681	0.00447465	329.179	0.00386712	320.569	0.0370492	359.173	0.000159465	338.556	0.00543094	368.649	0.00357908	333.549	0.0230558	343.815	0.00357335	324.084	0.0518873	345.802	0.00652494	334.738	0.00697614	340.368	0.00542606	368.599	0.0140738	347.721	0.0045659	328.942	0.0306493	351.449	0.00842481	320.779	0.0405606	333.476	0.0154823	326.419	0.0354831	329.179	0.00386712	320.779	0.0405606	333.476	0.0154823	324.204	0.040182
314.072	0.0293864	344.928	0.00239427	356.964	0.00468158	329.466	0.00401732	320.857	0.038391	359.452	0.000166657	338.841	0.00565089	368.906	0.00378099	333.846	0.0240113	344.113	0.00372685	324.368	0.0538707	346.097	0.00681122	335.038	0.00725793	340.671	0.00565618	368.882	0.0148069	348.009	0.00476235	329.23	0.0318308	351.714	0.00879734	321.089	0.0420109	333.779	0.0160988	326.708	0.0369355	329.466	0.00401732	321.089	0.0420109	333.779	0.0160988	324.508	0.0417625
314.371	0.0304808	345.211	0.00249582	357.248	0.00489565	329.753	0.00417132	321.145	0.0397612	359.731	0.000174129	339.126	0.00587681	369.163	0.00399273	334.142	0.024993	344.41	0.00388507	324.652	0.0559029	346.392	0.00710642	335.339	0.00754727	340.973	0.00589322	369.165	0.0155719	348.297	0.0049648	329.519	0.0330414	351.979	0.00918245	321.4	0.0434873	334.082	0.0167309	326.998	0.0384284	329.753	0.00417132	321.4	0.0434873	334.082	0.0167309	324.811	0.0433826
314.671	0.0316016	345.495	0.00260043	357.532	0.00511698	330.041	0.00432909	321.433	0.0411594	360.01	0.000181888	339.412	0.0061087	369.419	0.0042147	334.438	0.0260009	344.708	0.00404807	324.935	0.0579837	346.688	0.00741061	335.639	0.00784417	341.276	0.00613725	369.448	0.0163698	348.585	0.0051733	329.807	0.034281	352.244	0.00958035	321.71	0.0449889	334.385	0.0173788	327.287	0.0399616	330.041	0.00432909	321.71	0.0449889	334.385	0.0173788	325.115	0.0450422
314.971	0.0327488	345.778	0.0027081	357.815	0.00534568	330.328	0.00449065	321.72	0.042585	360.288	0.000189947	339.697	0.00634655	369.676	0.00444729	334.734	0.027035	345.006	0.00421589	325.219	0.060113	346.983	0.00772389	335.94	0.00814865	341.578	0.00638837	369.732	0.0172018	348.873	0.00538791	330.096	0.0355493	352.508	0.00999126	322.021	0.0465147	334.689	0.0180422	327.576	0.0415355	330.328	0.00449065	322.021	0.0465147	334.689	0.0180422	325.418	0.0467409
315.271	0.0339222	346.062	0.00281886	358.099	0.00558184	330.615	0.00465597	322.008	0.0440375	360.567	0.000198315	339.982	0.00659037	369.933	0.0046909	335.031	0.0280952	345.304	0.0043886	325.503	0.0622904	347.278	0.00804631	336.24	0.00846073	341.881	0.00664665	370.015	0.0180689	349.161	0.00560866	330.384	0.0368463	352.773	0.0104154	322.331	0.0480639	334.992	0.0187212	327.866	0.0431499	330.615	0.00465597	322.331	0.0480639	334.992	0.0187212	325.722	0.0484787
315.571	0.035122	346.345	0.00293273	358.383	0.00582555	330.903	0.00482503	322.296	0.0455165	360.846	0.000207002	340.268	0.00684012	370.19	0.00494593	335.327	0.0291814	345.602	0.00456624	325.786	0.0645156	347.573	0.00837794	336.541	0.00878039	342.183	0.00691217	370.298	0.0189722	349.449	0.00583559	330.673	0.0381717	353.038	0.0108529	322.642	0.0496352	335.295	0.0194156	328.155	0.0448049	330.903	0.00482503	322.642	0.0496352	335.295	0.0194156	326.025	0.050255
315.871	0.036348	346.628	0.00304972	358.666	0.00607691	331.19	0.00499779	322.584	0.0470211	361.125	0.00021602	340.553	0.00709579	370.447	0.00521281	335.623	0.0302934	345.899	0.00474887	326.07	0.0667881	347.868	0.00871884	336.842	0.00910764	342.485	0.00718501	370.581	0.0199128	349.737	0.00606874	330.961	0.0395251	353.303	0.011304	322.953	0.0512275	335.598	0.0201253	328.445	0.0465003	331.19	0.00499779	322.953	0.0512275	335.598	0.0201253	326.329	0.0520696
316.171	0.0376001	346.912	0.00316985	358.95	0.00633597	331.477	0.00517424	322.872	0.0485508	361.403	0.000225381	340.838	0.00735732	370.703	0.00549196	335.919	0.031431	346.197	0.00493653	326.354	0.0691075	348.163	0.00906903	337.142	0.00944246	342.788	0.00746525	370.864	0.0208918	350.025	0.00630812	331.25	0.0409063	353.567	0.0117689	323.263	0.0528396	335.901	0.0208503	328.734	0.0482359	331.477	0.00517424	323.263	0.0528396	335.901	0.0208503	326.632	0.053922
316.47	0.0388782	347.195	0.00329311	359.234	0.00660282	331.764	0.00535432	323.16	0.0501048	361.682	0.000235097	341.123	0.00762467	370.96	0.00578382	336.216	0.032594	346.495	0.00512928	326.638	0.071473	348.459	0.00942856	337.443	0.00978483	343.09	0.00775296	371.147	0.0219104	350.313	0.00655376	331.538	0.0423148	353.832	0.0122477	323.574	0.0544701	336.204	0.0215903	329.024	0.0500116	331.764	0.00535432	323.574	0.0544701	336.204	0.0215903	326.936	0.0558116
316.77	0.0401822	347.479	0.00341951	359.518	0.0068775	332.052	0.00553799	323.448	0.0516822	361.961	0.00024518	341.409	0.00789778	371.217	0.00608883	336.512	0.033782	346.793	0.00532716	326.921	0.0738841	348.754	0.00979744	337.743	0.0101347	343.393	0.00804823	371.43	0.0229697	350.601	0.00680565	331.827	0.0437503	354.097	0.0127406	323.884	0.0561178	336.507	0.0223452	329.313	0.051827	332.052	0.00553799	323.884	0.0561178	336.507	0.0223452	327.239	0.0577379
317.07	0.0415119	347.762	0.00354905	359.801	0.00716008	332.339	0.00572521	323.736	0.0532822	362.24	0.000255644	341.694	0.00817658	371.474	0.00640744	336.808	0.0349947	347.09	0.00553021	327.205	0.07634	349.049	0.0101757	338.044	0.0104921	343.695	0.00835112	371.713	0.024071	350.889	0.00706381	332.115	0.0452121	354.362	0.0132478	324.195	0.0577811	336.81	0.0231148	329.602	0.0536818	332.339	0.00572521	324.195	0.0577811	336.81	0.0231148	327.543	0.0597001
317.37	0.0428671	348.046	0.00368172	360.085	0.00745058	332.626	0.0059159	324.024	0.0549038	362.518	0.000266504	341.979	0.00846097	371.731	0.0067401	337.104	0.0362316	347.388	0.00573848	327.489	0.0788398	349.344	0.0105633	338.344	0.010857	343.998	0.00866173	371.996	0.0252153	351.177	0.00732823	332.404	0.0466999	354.626	0.0137693	324.505	0.0594585	337.113	0.0238989	329.892	0.0555756	332.626	0.0059159	324.505	0.0594585	337.113	0.0238989	327.846	0.0616976
317.67	0.0442476	348.329	0.0038175	360.369	0.00774905	332.914	0.00611001	324.312	0.056546	362.797	0.000277774	342.265	0.00875088	371.987	0.00708729	337.4	0.0374923	347.686	0.00595202	327.773	0.0813825	349.639	0.0109603	338.645	0.0112293	344.3	0.00898013	372.279	0.0264038	351.465	0.0075989	332.692	0.048213	354.891	0.0143052	324.816	0.0611485	337.417	0.0246973	330.181	0.0575078	332.914	0.00611001	324.816	0.0611485	337.417	0.0246973	328.15	0.0637295
317.97	0.0456531	348.613	0.00395639	360.652	0.00805549	333.201	0.00630746	324.6	0.0582078	363.076	0.00028947	342.55	0.00904619	372.244	0.00744948	337.697	0.0387762	347.984	0.00617086	328.056	0.0839672	349.935	0.0113666	338.945	0.0116089	344.603	0.00930641	372.562	0.0276378	351.753	0.00787578	332.981	0.0497506	355.156	0.0148558	325.126	0.0628493	337.72	0.0255097	330.471	0.0594778	333.201	0.00630746	325.126	0.0628493	337.72	0.0255097	328.453	0.0657949
318.27	0.0470834	348.896	0.00409835	360.936	0.00836992	333.488	0.00650818	324.888	0.0598879	363.355	0.000301608	342.835	0.00934679	372.501	0.00782713	337.993	0.0400829	348.281	0.00639507	328.34	0.0865928	350.23	0.0117822	339.246	0.0119959	344.905	0.00964066	372.845	0.0289185	352.041	0.00815887	333.269	0.0513123	355.421	0.015421	325.437	0.0645593	338.023	0.026336	330.76	0.0614851	333.488	0.00650818	325.437	0.0645593	338.023	0.026336	328.757	0.067893
318.569	0.0485382	349.18	0.00424336	361.22	0.00869233	333.776	0.00671208	325.176	0.0615853	363.633	0.000314206	343.121	0.00965254	372.758	0.00822075	338.289	0.0414117	348.579	0.00662467	328.624	0.0892579	350.525	0.0122071	339.546	0.0123902	345.208	0.00998298	373.128	0.030247	352.329	0.00844811	333.558	0.0528972	355.685	0.0160009	325.747	0.0662767	338.326	0.0271757	331.05	0.0635289	333.776	0.00671208	325.747	0.0662767	338.326	0.0271757	329.06	0.0700226
318.869	0.0500171	349.463	0.0043914	361.503	0.0090227	334.063	0.00691907	325.463	0.0632986	363.912	0.000327282	343.406	0.0099633	373.015	0.00863081	338.585	0.0427618	348.877	0.00685973	328.907	0.0919615	350.82	0.0126412	339.847	0.0127917	345.51	0.0103335	373.412	0.0316246	352.617	0.00874346	333.846	0.0545044	355.95	0.0165957	326.058	0.0679996	338.629	0.0280287	331.339	0.0656084	334.063	0.00691907	326.058	0.0679996	338.629	0.0280287	329.364	0.0721828
319.169	0.0515198	349.747	0.00454242	361.787	0.00936102	334.35	0.00712905	325.751	0.0650266	364.191	0.000340855	343.691	0.0102789	373.272	0.00905782	338.882	0.0441326	349.175	0.00710029	329.191	0.0947021	351.115	0.0130844	340.147	0.0132004	345.813	0.0106922	373.695	0.0330525	352.905	0.00904488	334.135	0.0561332	356.215	0.0172053	326.368	0.0697261	338.932	0.0288947	331.628	0.0677227	334.35	0.00712905	326.368	0.0697261	338.932	0.0288947	329.667	0.0743723
319.469	0.053046	350.03	0.00469637	362.071	0.00970722	334.637	0.00734193	326.039	0.0667678	364.469	0.000354947	343.977	0.0105992	373.528	0.00950226	339.178	0.0455233	349.472	0.00734641	329.475	0.0974782	351.41	0.0135368	340.448	0.0136162	346.115	0.0110594	373.978	0.034532	353.193	0.0093523	334.423	0.0577827	356.48	0.0178297	326.679	0.0714544	339.235	0.0297734	331.918	0.0698709	334.637	0.00734193	326.679	0.0714544	339.235	0.0297734	329.971	0.07659
319.769	0.0545952	350.314	0.00485322	362.355	0.0100613	334.925	0.00755758	326.327	0.0685209	364.748	0.00036958	344.262	0.0109241	373.785	0.00996465	339.474	0.0469331	349.77	0.00759814	329.759	0.100288	351.706	0.0139981	340.749	0.0140391	346.417	0.0114351	374.261	0.0360643	353.481	0.00966566	334.712	0.0594519	356.744	0.018469	326.989	0.0731824	339.538	0.0306644	332.207	0.072052	334.925	0.00755758	326.989	0.0731824	339.538	0.0306644	330.274	0.0788346
320.069	0.0561671	350.597	0.00501291	362.638	0.0104231	335.212	0.0077759	326.615	0.0702844	365.027	0.000384776	344.547	0.0112532	374.042	0.0104455	339.77	0.048361	350.068	0.00785554	330.042	0.103131	352.001	0.0144684	341.049	0.014469	346.72	0.0118194	374.544	0.0376506	353.769	0.00998488	335.001	0.0611399	357.009	0.0191231	327.3	0.074908	339.841	0.0315676	332.497	0.074265	335.212	0.0077759	327.3	0.074908	339.841	0.0315676	330.578	0.0811047
320.369	0.0577613	350.881	0.00517537	362.922	0.0107926	335.499	0.00799676	326.903	0.0720568	365.306	0.00040056	344.832	0.0115865	374.299	0.0109453	340.067	0.0498062	350.366	0.0081187	330.326	0.106004	352.296	0.0149476	341.35	0.0149059	347.022	0.0122126	374.827	0.0392921	354.057	0.0103099	335.289	0.0628455	357.274	0.0197921	327.61	0.0766293	340.145	0.0324825	332.786	0.0765085	335.499	0.00799676	327.61	0.0766293	340.145	0.0324825	330.881	0.083399
320.669	0.0593773	351.164	0.00534056	363.206	0.0111697	335.787	0.00822003	327.191	0.0738364	365.584	0.000416959	345.118	0.0119237	374.556	0.0114646	340.363	0.0512677	350.663	0.00838767	330.61	0.108907	352.591	0.0154354	341.65	0.0153497	347.325	0.0126147	375.11	0.0409901	354.345	0.0106406	335.578	0.0645677	357.539	0.0204758	327.921	0.078344	340.448	0.0334089	333.076	0.0787814	335.787	0.00822003	327.921	0.078344	340.448	0.0334089	331.185	0.085716
320.968	0.0610146	351.448	0.00550838	363.489	0.0115543	336.074	0.00844558	327.479	0.0756216	365.863	0.000434001	345.403	0.0122645	374.812	0.0120038	340.659	0.0527443	350.961	0.00866254	330.893	0.111836	352.886	0.0159319	341.951	0.0158005	347.627	0.013026	375.393	0.0427458	354.633	0.0109769	335.866	0.0663054	357.803	0.0211742	328.231	0.0800502	340.751	0.0343464	333.365	0.0810824	336.074	0.00844558	328.231	0.0800502	340.751	0.0343464	331.488	0.0880541
321.268	0.0626727	351.731	0.00567878	363.773	0.0119462	336.361	0.00867327	327.767	0.0774108	366.142	0.000451716	345.688	0.0126088	375.069	0.0125636	340.955	0.0542351	351.259	0.00894339	331.177	0.114791	353.181	0.0164369	342.251	0.0162581	347.93	0.0134466	375.676	0.0445605	354.921	0.0113187	336.155	0.0680574	358.068	0.0218872	328.542	0.0817454	341.054	0.0352948	333.654	0.0834102	336.361	0.00867327	328.542	0.0817454	341.054	0.0352948	331.792	0.0904119
321.568	0.0643513	352.015	0.00585167	364.057	0.0123454	336.649	0.00890296	328.055	0.0792023	366.421	0.000470135	345.974	0.0129563	375.326	0.0131443	341.251	0.055739	351.557	0.00923034	331.461	0.11777	353.477	0.0169503	342.552	0.0167226	348.232	0.0138769	375.959	0.0464354	355.209	0.0116659	336.443	0.0698225	358.333	0.0226147	328.852	0.0834278	341.357	0.0362538	333.944	0.0857632	336.649	0.00890296	328.852	0.0834278	341.357	0.0362538	332.095	0.0927877
321.868	0.0660497	352.298	0.00602697	364.34	0.0127516	336.936	0.00913449	328.343	0.0809942	366.699	0.000489293	346.259	0.0133067	375.583	0.0137466	341.548	0.0572546	351.854	0.00952347	331.745	0.120769	353.772	0.017472	342.852	0.0171939	348.535	0.0143169	376.242	0.0483717	355.497	0.0120183	336.732	0.0715995	358.598	0.0233565	329.163	0.0850949	341.66	0.0372231	334.233	0.0881399	336.936	0.00913449	329.163	0.0850949	341.66	0.0372231	332.399	0.0951799
322.168	0.0677676	352.581	0.00620457	364.624	0.0131647	337.223	0.00936771	328.631	0.0827849	366.978	0.000509226	346.544	0.0136598	375.84	0.0143709	341.844	0.0587809	352.152	0.00982292	332.028	0.123788	354.067	0.0180018	343.153	0.0176722	348.837	0.014767	376.525	0.0503705	355.785	0.012376	337.02	0.073387	358.862	0.0241125	329.473	0.0867446	341.963	0.0382025	334.523	0.0905388	337.223	0.00936771	329.473	0.0867446	341.963	0.0382025	332.702	0.0975867
322.468	0.0695042	352.865	0.00638439	364.908	0.0135845	337.51	0.00960246	328.919	0.0845723	367.257	0.000529973	346.83	0.0140152	376.096	0.0150177	342.14	0.0603166	352.45	0.0101288	332.312	0.126823	354.362	0.0185396	343.453	0.0181573	349.14	0.0152275	376.808	0.0524332	356.073	0.0127387	337.309	0.0751837	359.127	0.0248824	329.784	0.0883746	342.266	0.0391917	334.812	0.0929583	337.51	0.00960246	329.784	0.0883746	342.266	0.0391917	333.006	0.100006
322.768	0.0712591	353.148	0.00656633	365.191	0.0140108	337.798	0.00983857	329.207	0.0863547	367.536	0.000551575	347.115	0.0143727	376.353	0.0156876	342.436	0.0618604	352.748	0.0104413	332.596	0.129874	354.657	0.0190854	343.754	0.0186493	349.442	0.0156986	377.091	0.0545608	356.361	0.0131063	337.597	0.0769883	359.392	0.0256662	330.095	0.0899829	342.569	0.0401904	335.102	0.0953965	337.798	0.00983857	330.095	0.0899829	342.569	0.0401904	333.309	0.102437
323.067	0.0730319	353.432	0.00675028	365.475	0.0144434	338.085	0.0100759	329.494	0.0881302	367.814	0.000574076	347.4	0.014732	376.61	0.0163811	342.733	0.063411	353.045	0.0107605	332.879	0.132937	354.953	0.0196389	344.054	0.0191483	349.745	0.0161807	377.375	0.0567546	356.649	0.0134787	337.886	0.0787995	359.657	0.0264635	330.405	0.0915671	342.873	0.0411985	335.391	0.0978518	338.085	0.0100759	330.405	0.0915671	342.873	0.0411985	333.613	0.104877
323.367	0.0748218	353.715	0.00693612	365.759	0.014882	338.372	0.0103142	329.782	0.0898968	368.093	0.000597525	347.685	0.0150927	376.867	0.0170985	343.029	0.064967	353.343	0.0110867	333.163	0.13601	355.248	0.0202001	344.355	0.0196544	350.047	0.0166742	377.658	0.0590158	356.937	0.0138558	338.174	0.0806157	359.921	0.0272741	330.716	0.0931251	343.176	0.0422158	335.68	0.100322	338.372	0.0103142	330.716	0.0931251	343.176	0.0422158	333.916	0.107325
323.667	0.0766284	353.999	0.00712374	366.043	0.0153264	338.66	0.0105534	330.07	0.0916526	368.372	0.000621972	347.971	0.0154545	377.124	0.0178405	343.325	0.0665271	353.641	0.01142	333.447	0.139091	355.543	0.0207687	344.655	0.0201676	350.349	0.0171796	377.941	0.0613453	357.225	0.0142374	338.463	0.0824356	360.186	0.0280977	331.026	0.0946548	343.479	0.0432421	335.97	0.102806	338.66	0.0105534	331.026	0.0946548	343.479	0.0432421	334.22	0.109779
323.967	0.078451	354.282	0.00731302	366.326	0.0157763	338.947	0.0107932	330.358	0.0933956	368.651	0.000647471	348.256	0.0158171	377.38	0.0186075	343.621	0.0680898	353.939	0.0117606	333.731	0.142178	355.838	0.0213448	344.956	0.0206881	350.652	0.0176971	378.224	0.0637445	357.513	0.0146234	338.751	0.0842578	360.451	0.028934	331.337	0.0961539	343.782	0.0442774	336.259	0.105302	338.947	0.0107932	331.337	0.0961539	343.782	0.0442774	334.523	0.112236
324.267	0.0802893	354.566	0.00750384	366.61	0.0162315	339.234	0.0110335	330.646	0.0951239	368.929	0.00067408	348.541	0.0161801	377.637	0.0194	343.917	0.0696537	354.236	0.0121088	334.014	0.145268	356.133	0.0219282	345.257	0.0212161	350.954	0.0182273	378.507	0.0662143	357.801	0.0150137	339.04	0.0860807	360.715	0.0297827	331.647	0.0976204	344.085	0.0453215	336.549	0.107807	339.234	0.0110335	331.647	0.0976204	344.085	0.0453215	334.827	0.114695
324.567	0.0821425	354.849	0.00769606	366.894	0.0166916	339.522	0.0112741	330.934	0.0968354	369.208	0.000701861	348.827	0.0165432	377.894	0.0202184	344.214	0.0712174	354.534	0.0124648	334.298	0.148359	356.428	0.0225188	345.557	0.0217516	351.257	0.0187708	378.79	0.0687558	358.089	0.0154081	339.328	0.0879028	360.98	0.0306434	331.958	0.0990522	344.388	0.0463745	336.838	0.110319	339.522	0.0112741	331.958	0.0990522	344.388	0.0463745	335.13	0.117154
324.867	0.0840101	355.133	0.00788956	367.177	0.0171564	339.809	0.0115148	331.222	0.0985281	369.487	0.000730881	349.112	0.0169061	378.151	0.0210632	344.51	0.0727793	354.832	0.012829	334.582	0.151448	356.724	0.0231164	345.858	0.0222949	351.559	0.019328	379.073	0.0713702	358.377	0.0158065	339.617	0.0897228	361.245	0.0315157	332.268	0.100447	344.691	0.0474363	337.128	0.112837	339.809	0.0115148	332.268	0.100447	344.691	0.0474363	335.434	0.119611
325.166	0.0858916	355.416	0.0080842	367.461	0.0176254	340.096	0.0117554	331.51	0.1002	369.766	0.000761211	349.397	0.0172683	378.408	0.0219348	344.806	0.0743382	355.13	0.0132016	334.866	0.154533	357.019	0.0237211	346.158	0.0228463	351.862	0.0198997	379.356	0.0740583	358.665	0.0162088	339.905	0.0915391	361.51	0.0323993	332.579	0.101804	344.994	0.048507	337.417	0.115358	340.096	0.0117554	332.579	0.101804	344.994	0.048507	335.737	0.122065
325.466	0.0877864	355.7	0.00827983	367.745	0.0180985	340.383	0.0119957	331.798	0.101849	370.044	0.000792928	349.683	0.0176295	378.664	0.0228337	345.102	0.0758923	355.427	0.0135829	335.149	0.157612	357.314	0.0243328	346.459	0.023406	352.164	0.0204863	379.639	0.0768212	358.953	0.0166149	340.194	0.0933501	361.774	0.0332937	332.889	0.10312	345.297	0.0495868	337.707	0.117881	340.383	0.0119957	332.889	0.10312	345.297	0.0495868	336.041	0.124513
325.766	0.0896939	355.983	0.00847632	368.028	0.0185751	340.671	0.0122355	332.086	0.103474	370.323	0.000826112	349.968	0.0179893	378.921	0.0237603	345.399	0.0774404	355.725	0.0139734	335.433	0.160682	357.609	0.0249513	346.759	0.0239743	352.467	0.0210887	379.922	0.0796599	359.241	0.0170246	340.483	0.0951545	362.039	0.0341985	333.2	0.104393	345.601	0.0506758	337.996	0.120403	340.671	0.0122355	333.2	0.104393	345.601	0.0506758	336.344	0.126954
326.066	0.0916138	356.267	0.00867352	368.312	0.019055	340.958	0.0124747	332.374	0.105071	370.602	0.000860851	350.253	0.0183473	379.178	0.0247149	345.695	0.0789809	356.023	0.0143733	335.717	0.16374	357.904	0.0255768	347.06	0.0245517	352.769	0.0217076	380.205	0.0825752	359.529	0.0174379	340.771	0.0969507	362.304	0.0351131	333.51	0.105623	345.904	0.0517741	338.285	0.122922	340.958	0.0124747	333.51	0.105623	345.904	0.0517741	336.648	0.129385
326.366	0.0935453	356.55	0.00887129	368.596	0.0195378	341.245	0.012713	332.662	0.10664	370.881	0.000897239	350.539	0.0187031	379.435	0.025698	345.991	0.0805123	356.321	0.0147833	336	0.166784	358.199	0.026209	347.36	0.0251384	353.072	0.0223438	380.488	0.0855681	359.817	0.0178546	341.06	0.0987371	362.569	0.0360371	333.821	0.106806	346.207	0.0528823	338.575	0.125435	341.245	0.012713	333.821	0.106806	346.207	0.0528823	336.951	0.131805
326.666	0.0954881	356.834	0.00906947	368.88	0.020023	341.533	0.0129503	332.95	0.108178	371.159	0.000935374	350.824	0.0190564	379.692	0.02671	346.287	0.0820332	356.618	0.0152036	336.284	0.169812	358.495	0.0268482	347.661	0.0257349	353.374	0.0229981	380.771	0.0886393	360.105	0.0182746	341.348	0.100512	362.833	0.03697	334.131	0.107942	346.51	0.0540005	338.864	0.127942	341.533	0.0129503	334.131	0.107942	346.51	0.0540005	337.255	0.134213
326.966	0.0974415	357.117	0.00926792	369.163	0.0205103	341.82	0.0131863	333.237	0.109684	371.438	0.000975365	351.109	0.0194067	379.948	0.0277511	346.584	0.0835422	356.916	0.0156349	336.568	0.172822	358.79	0.0274943	347.961	0.0263417	353.677	0.0236716	381.055	0.0917897	360.393	0.0186979	341.637	0.102275	363.098	0.0379111	334.442	0.10903	346.813	0.0551292	339.154	0.130439	341.82	0.0131863	334.442	0.10903	346.813	0.0551292	337.558	0.136606
327.265	0.0994052	357.401	0.00946649	369.447	0.0209992	342.107	0.0134208	333.525	0.111155	371.717	0.00101732	351.394	0.0197537	380.205	0.0288217	346.88	0.0850378	357.214	0.0160776	336.852	0.175811	359.085	0.0281473	348.262	0.0269594	353.979	0.024365	381.338	0.09502	360.681	0.0191244	341.925	0.104024	363.363	0.03886	334.752	0.110067	347.116	0.056269	339.443	0.132925	342.107	0.0134208	334.752	0.110067	347.116	0.056269	337.862	0.138983
327.565	0.101379	357.684	0.00966503	369.731	0.0214893	342.395	0.0136537	333.813	0.11259	371.996	0.00106137	351.68	0.0200969	380.462	0.0299222	347.176	0.0865187	357.512	0.0165323	337.135	0.178777	359.38	0.0288074	348.562	0.0275885	354.281	0.0250796	381.621	0.098331	360.969	0.019554	342.214	0.105757	363.628	0.039816	335.063	0.111052	347.419	0.0574204	339.733	0.135398	342.395	0.0136537	335.063	0.111052	347.419	0.0574204	338.165	0.141342
327.865	0.103361	357.968	0.00986339	370.014	0.0219802	342.682	0.0138848	334.101	0.113986	372.274	0.00110764	351.965	0.0204359	380.719	0.0310527	347.472	0.0879835	357.809	0.0169997	337.419	0.181717	359.675	0.0294746	348.863	0.0282297	354.584	0.0258164	381.904	0.101723	361.257	0.0199867	342.502	0.107473	363.892	0.0407785	335.373	0.111985	347.722	0.0585841	340.022	0.137854	342.682	0.0138848	335.373	0.111985	347.722	0.0585841	338.469	0.143682
328.165	0.105353	358.251	0.0100614	370.298	0.0224715	342.969	0.0141138	334.389	0.115342	372.553	0.00115627	352.25	0.0207704	380.976	0.0322136	347.768	0.0894309	358.107	0.0174804	337.703	0.18463	359.97	0.0301492	349.163	0.0288837	354.886	0.0265765	382.187	0.105197	361.545	0.0204224	342.791	0.109171	364.157	0.0417469	335.684	0.112864	348.025	0.0597609	340.311	0.140293	342.969	0.0141138	335.684	0.112864	348.025	0.0597609	338.772	0.146002
328.465	0.107353	358.534	0.010259	370.582	0.0229626	343.256	0.0143406	334.677	0.116657	372.832	0.00120741	352.536	0.0210999	381.232	0.0334052	348.065	0.0908597	358.405	0.0179751	337.986	0.187514	360.266	0.0308312	349.464	0.0295512	355.189	0.0273613	382.47	0.108754	361.833	0.0208611	343.079	0.11085	364.422	0.0427204	335.994	0.113688	348.329	0.0609516	340.601	0.142712	343.256	0.0143406	335.994	0.113688	348.329	0.0609516	339.076	0.148299
328.765	0.109362	358.818	0.0104559	370.865	0.0234531	343.544	0.0145651	334.965	0.117928	373.111	0.00126121	352.821	0.0214241	381.489	0.0346276	348.361	0.0922686	358.703	0.0184846	338.27	0.190366	360.561	0.031521	349.765	0.0302331	355.491	0.028172	382.753	0.112393	362.121	0.0213029	343.368	0.112507	364.687	0.0436985	336.305	0.114456	348.632	0.0621571	340.89	0.145109	343.544	0.0145651	336.305	0.114456	348.632	0.0621571	339.379	0.150572
329.065	0.111378	359.101	0.010652	371.149	0.0239425	343.831	0.014787	335.253	0.119153	373.389	0.00131785	353.106	0.0217425	381.746	0.035881	348.657	0.0936564	359	0.0190096	338.554	0.193184	360.856	0.0322189	350.065	0.0309302	355.794	0.0290099	383.036	0.116116	362.409	0.0217477	343.656	0.114143	364.951	0.0446804	336.615	0.115169	348.935	0.0633785	341.18	0.147483	343.831	0.014787	336.615	0.115169	348.935	0.0633785	339.683	0.152821
329.364	0.113401	359.385	0.0108473	371.433	0.0244304	344.118	0.0150061	335.541	0.120332	373.668	0.00137751	353.392	0.0220548	382.003	0.0371655	348.953	0.0950222	359.298	0.0195511	338.838	0.195968	361.151	0.032925	350.366	0.0316435	356.096	0.0298767	383.319	0.119922	362.697	0.0221956	343.945	0.115755	365.216	0.0456654	336.926	0.115825	349.238	0.0646169	341.469	0.149831	344.118	0.0150061	336.926	0.115825	349.238	0.0646169	339.986	0.155045
329.664	0.115432	359.668	0.0110415	371.716	0.0249163	344.406	0.0152223	335.829	0.121463	373.947	0.00144037	353.677	0.0223605	382.26	0.0384815	349.25	0.0963648	359.596	0.02011	339.121	0.198714	361.446	0.0336398	350.666	0.032374	356.399	0.0307738	383.602	0.123812	362.985	0.0226467	344.233	0.117343	365.481	0.0466527	337.237	0.116423	349.541	0.0658736	341.759	0.152152	344.406	0.0152223	337.237	0.116423	349.541	0.0658736	340.29	0.157241
329.964	0.11747	359.952	0.0112345	372	0.0253996	344.693	0.0154355	336.117	0.122544	374.225	0.00150664	353.962	0.0226594	382.516	0.0398288	349.546	0.0976832	359.894	0.0206871	339.405	0.201422	361.742	0.0343637	350.967	0.0331228	356.701	0.0317027	383.885	0.127787	363.273	0.023101	344.522	0.118906	365.746	0.0476416	337.547	0.116965	349.844	0.0671497	342.048	0.154443	344.693	0.0154355	337.547	0.116965	349.844	0.0671497	340.593	0.15941
330.264	0.119514	360.235	0.0114263	372.284	0.02588	344.98	0.0156453	336.405	0.123574	374.504	0.00157654	354.248	0.022951	382.773	0.0412077	349.842	0.0989767	360.191	0.0212836	339.689	0.20409	362.037	0.0350971	351.267	0.033891	357.004	0.0326653	384.168	0.131845	363.561	0.0235587	344.81	0.120442	366.01	0.0486314	337.858	0.117449	350.147	0.0684468	342.337	0.156704	344.98	0.0156453	337.858	0.117449	350.147	0.0684468	340.897	0.16155
330.564	0.121565	360.519	0.0116166	372.568	0.0263568	345.268	0.0158519	336.693	0.124551	374.783	0.0016503	354.533	0.0232349	383.03	0.0426181	350.138	0.100244	360.489	0.0219004	339.972	0.206716	362.332	0.0358405	351.568	0.0346799	357.306	0.0336631	384.451	0.135988	363.849	0.0240199	345.099	0.121951	366.275	0.0496212	338.168	0.117876	350.45	0.0697664	342.627	0.158932	345.268	0.0158519	338.168	0.117876	350.45	0.0697664	341.2	0.163662
330.864	0.123622	360.802	0.0118054	372.851	0.0268297	345.555	0.0160548	336.981	0.125474	375.062	0.00172817	354.818	0.0235109	383.287	0.0440601	350.435	0.101486	360.787	0.0225387	340.256	0.2093	362.627	0.0365946	351.868	0.0354907	357.609	0.0346982	384.734	0.140215	364.137	0.0244848	345.387	0.123431	366.54	0.0506102	338.479	0.118246	350.753	0.0711101	342.916	0.161127	345.555	0.0160548	338.479	0.118246	350.753	0.0711101	341.504	0.165744
331.164	0.125686	361.086	0.0119925	373.135	0.0272981	345.842	0.0162541	337.268	0.126343	375.34	0.0018104	355.103	0.0237785	383.544	0.0455337	350.731	0.1027	361.085	0.0231998	340.54	0.21184	362.922	0.0373598	352.169	0.0363249	357.911	0.0357723	385.018	0.144527	364.425	0.0249536	345.676	0.124882	366.805	0.0515977	338.789	0.118559	351.057	0.0724796	343.206	0.163286	345.842	0.0162541	338.789	0.118559	351.057	0.0724796	341.807	0.167795
331.463	0.127756	361.369	0.0121779	373.419	0.0277616	346.13	0.0164495	337.556	0.127155	375.619	0.00189728	355.389	0.0240374	383.8	0.0470388	351.027	0.103886	361.382	0.0238848	340.824	0.214336	363.217	0.038137	352.469	0.0371839	358.213	0.0368874	385.301	0.148922	364.712	0.0254266	345.964	0.126303	367.069	0.0525827	339.1	0.118816	351.36	0.0738768	343.495	0.165408	346.13	0.0164495	339.1	0.118816	351.36	0.0738768	342.111	0.169817
331.763	0.129832	361.653	0.0123615	373.702	0.0282197	346.417	0.0166411	337.844	0.127911	375.898	0.00198911	355.674	0.0242873	384.057	0.0485753	351.323	0.105045	361.68	0.0245951	341.107	0.216786	363.513	0.0389267	352.77	0.0380691	358.516	0.0380457	385.584	0.153402	365	0.0259039	346.253	0.127693	367.334	0.0535645	339.41	0.119018	351.663	0.0753037	343.785	0.167493	346.417	0.0166411	339.41	0.119018	351.663	0.0753037	342.414	0.171808
332.063	0.131914	361.936	0.0125433	373.986	0.0286718	346.704	0.0168285	338.132	0.128608	376.177	0.00208619	355.959	0.024528	384.314	0.0501432	351.619	0.106175	361.978	0.025332	341.391	0.21919	363.808	0.0397299	353.07	0.0389823	358.818	0.0392492	385.867	0.157964	365.288	0.026386	346.542	0.129052	367.599	0.0545423	339.721	0.119165	351.966	0.0767622	344.074	0.169538	346.704	0.0168285	339.721	0.119165	351.966	0.0767622	342.718	0.173769
332.363	0.134003	362.22	0.012723	374.27	0.0291176	346.991	0.0170118	338.42	0.129247	376.455	0.00218885	356.245	0.024759	384.571	0.0517422	351.916	0.107277	362.276	0.026097	341.675	0.221547	364.103	0.0405473	353.371	0.0399251	359.121	0.0405003	386.15	0.16261	365.576	0.0268731	346.83	0.13038	367.864	0.0555151	340.031	0.11926	352.269	0.0782544	344.363	0.171544	346.991	0.0170118	340.031	0.11926	352.269	0.0782544	343.021	0.1757
332.663	0.136098	362.503	0.0129007	374.553	0.0295565	347.279	0.0171908	338.708	0.129826	376.734	0.00229746	356.53	0.0249801	384.828	0.0533722	352.212	0.10835	362.573	0.0268916	341.959	0.223857	364.398	0.04138	353.671	0.0408993	359.423	0.041801	386.433	0.167338	365.864	0.0273656	347.119	0.131675	368.128	0.0564821	340.342	0.119302	352.572	0.0797828	344.653	0.17351	347.279	0.0171908	340.342	0.119302	352.572	0.0797828	343.325	0.177601
332.963	0.1382	362.787	0.0130764	374.837	0.0299882	347.566	0.0173654	338.996	0.130345	377.013	0.00241238	356.815	0.025191	385.084	0.055033	352.508	0.109395	362.871	0.0277173	342.242	0.226121	364.693	0.0422288	353.972	0.0419066	359.726	0.0431539	386.716	0.172147	366.152	0.027864	347.407	0.132937	368.393	0.0574426	340.652	0.119294	352.875	0.0813495	344.942	0.175433	347.566	0.0173654	340.652	0.119294	352.875	0.0813495	343.628	0.179473
333.263	0.140308	363.07	0.01325	375.121	0.0304122	347.853	0.0175356	339.284	0.130803	377.292	0.00253401	357.101	0.0253916	385.341	0.0567243	352.804	0.110411	363.169	0.0285757	342.526	0.228337	364.988	0.0430949	354.273	0.0429491	360.028	0.0445613	386.999	0.177037	366.44	0.0283687	347.696	0.134167	368.658	0.0583955	340.963	0.119237	353.178	0.082957	345.232	0.177316	347.853	0.0175356	340.963	0.119237	353.178	0.082957	343.932	0.181316
333.562	0.142424	363.354	0.0134215	375.405	0.030828	348.141	0.0177013	339.572	0.1312	377.57	0.00266276	357.386	0.0255814	385.598	0.0584458	353.101	0.1114	363.467	0.0294686	342.81	0.230506	365.284	0.0439794	354.573	0.0440287	360.331	0.0460258	387.282	0.182008	366.728	0.0288802	347.984	0.135364	368.923	0.0593401	341.273	0.119133	353.481	0.0846079	345.521	0.179156	348.141	0.0177013	341.273	0.119133	353.481	0.0846079	344.235	0.183132
333.862	0.144548	363.637	0.0135909	375.688	0.0312352	348.428	0.0178623	339.86	0.131535	377.849	0.00279909	357.671	0.0257604	385.855	0.0601972	353.397	0.112361	363.765	0.0303978	343.093	0.232629	365.579	0.0448835	354.874	0.0451475	360.633	0.0475498	387.565	0.187057	367.016	0.0293991	348.273	0.136527	369.187	0.0602756	341.584	0.118984	353.785	0.0863048	345.811	0.180953	348.428	0.0178623	341.584	0.118984	353.785	0.0863048	344.539	0.184921
334.162	0.146679	363.921	0.0137582	375.972	0.0316335	348.715	0.0180188	340.148	0.131809	378.128	0.00294346	357.956	0.0259283	386.112	0.0619782	353.693	0.113296	364.062	0.0313649	343.377	0.234706	365.874	0.0458085	355.174	0.0463076	360.936	0.0491361	387.848	0.192185	367.304	0.0299259	348.561	0.137658	369.452	0.0612009	341.894	0.118793	354.088	0.0880504	346.1	0.182708	348.715	0.0180188	341.894	0.118793	354.088	0.0880504	344.842	0.186685
334.462	0.148819	364.204	0.0139236	376.256	0.0320225	349.003	0.0181705	340.436	0.132021	378.407	0.00309636	358.242	0.026085	386.368	0.0637882	353.989	0.114204	364.36	0.032372	343.661	0.236738	366.169	0.0467556	355.475	0.0475114	361.238	0.0507872	388.131	0.197389	367.592	0.0304613	348.85	0.138755	369.717	0.0621154	342.205	0.11856	354.391	0.0898474	346.389	0.18442	349.003	0.0181705	342.205	0.11856	354.391	0.0898474	345.146	0.188425
334.762	0.150968	364.487	0.0140869	376.539	0.0324018	349.29	0.0183176	340.724	0.132171	378.685	0.00325832	358.527	0.0262302	386.625	0.065627	354.286	0.115087	364.658	0.033421	343.945	0.238726	366.464	0.0477264	355.775	0.048761	361.541	0.052506	388.414	0.202669	367.88	0.0310059	349.138	0.139819	369.982	0.0630182	342.515	0.11829	354.694	0.0916988	346.679	0.186091	349.29	0.0183176	342.515	0.11829	354.694	0.0916988	345.449	0.190143
335.062	0.153126	364.771	0.0142484	376.823	0.032771	349.577	0.0184599	341.012	0.132258	378.964	0.00342988	358.812	0.0263638	386.882	0.067494	354.582	0.115947	364.956	0.0345138	344.228	0.240671	366.76	0.0487223	356.076	0.0500589	361.843	0.0542952	388.697	0.208023	368.168	0.0315606	349.427	0.140851	370.246	0.0639084	342.826	0.117985	354.997	0.0936074	346.968	0.187719	349.577	0.0184599	342.826	0.117985	354.997	0.0936074	345.753	0.19184
335.362	0.155295	365.054	0.014408	377.107	0.03313	349.864	0.0185974	341.299	0.132285	379.243	0.00361163	359.098	0.0264858	387.139	0.0693886	354.878	0.116783	365.253	0.0356526	344.512	0.242574	367.055	0.0497449	356.376	0.0514075	362.145	0.0561575	388.981	0.213449	368.456	0.032126	349.715	0.141851	370.511	0.0647852	343.136	0.117648	355.3	0.0955764	347.258	0.189307	349.864	0.0185974	343.136	0.117648	355.3	0.0955764	346.056	0.193519
335.661	0.157475	365.338	0.014566	377.39	0.0334782	350.152	0.0187303	341.587	0.132249	379.522	0.00380419	359.383	0.0265959	387.396	0.0713105	355.174	0.117598	365.551	0.0368395	344.796	0.244437	367.35	0.0507958	356.677	0.0528094	362.448	0.058096	389.264	0.218946	368.744	0.032703	350.004	0.142819	370.776	0.0656478	343.447	0.117281	355.603	0.0976086	347.547	0.190854	350.152	0.0187303	343.447	0.117281	355.603	0.0976086	346.36	0.195181
335.961	0.159666	365.621	0.0147225	377.674	0.0338156	350.439	0.0188584	341.875	0.132153	379.8	0.00400819	359.668	0.0266942	387.652	0.0732589	355.47	0.118393	365.849	0.0380766	345.079	0.246262	367.645	0.0518767	356.977	0.0542671	362.75	0.0601134	389.547	0.224512	369.032	0.0332924	350.292	0.143756	371.041	0.0664955	343.757	0.116888	355.906	0.0997074	347.837	0.192362	350.439	0.0188584	343.757	0.116888	355.906	0.0997074	346.663	0.196829
336.261	0.161871	365.905	0.0148777	377.958	0.0341419	350.726	0.0189818	342.163	0.131995	380.079	0.00422431	359.954	0.0267806	387.909	0.0752333	355.767	0.119169	366.147	0.0393663	345.363	0.24805	367.94	0.0529894	357.278	0.0557833	363.053	0.0622128	389.83	0.230145	369.32	0.0338953	350.581	0.144662	371.305	0.0673274	344.068	0.116473	356.209	0.101876	348.126	0.193832	350.726	0.0189818	344.068	0.116473	356.209	0.101876	346.967	0.198466
336.561	0.164088	366.188	0.0150316	378.241	0.0344568	351.014	0.0191006	342.451	0.131778	380.358	0.00445327	360.239	0.0268549	388.166	0.0772331	356.063	0.11993	366.444	0.0407108	345.647	0.249804	368.235	0.0541358	357.578	0.0573607	363.355	0.064397	390.113	0.235844	369.608	0.0345125	350.869	0.145539	371.57	0.0681429	344.379	0.116038	356.513	0.104117	348.415	0.195265	351.014	0.0191006	344.379	0.116038	356.513	0.104117	347.27	0.200093
336.861	0.166321	366.472	0.0151847	378.525	0.0347601	351.301	0.0192148	342.739	0.131501	380.637	0.00469583	360.524	0.0269173	388.423	0.0792575	356.359	0.120676	366.742	0.0421124	345.931	0.251526	368.531	0.0553176	357.879	0.0590021	363.658	0.066669	390.396	0.241605	369.896	0.0351451	351.158	0.146387	371.835	0.0689411	344.689	0.115589	356.816	0.106434	348.705	0.196663	351.301	0.0192148	344.689	0.115589	356.816	0.106434	347.574	0.201715
337.161	0.168569	366.755	0.0153371	378.809	0.0350518	351.588	0.0193245	343.027	0.131166	380.915	0.00495276	360.81	0.0269678	388.68	0.0813059	356.655	0.121409	367.04	0.0435737	346.214	0.253218	368.826	0.0565371	358.179	0.0607102	363.96	0.0690319	390.679	0.247427	370.184	0.0357942	351.446	0.147207	372.1	0.0697214	345	0.115128	357.119	0.10883	348.994	0.198027	351.588	0.0193245	345	0.115128	357.119	0.10883	347.877	0.203334
337.461	0.170835	367.039	0.015489	379.093	0.0353317	351.876	0.0194297	343.315	0.130772	381.194	0.0052249	361.095	0.0270063	388.936	0.0833775	356.952	0.122133	367.338	0.045097	346.498	0.254883	369.121	0.057796	358.48	0.0624881	364.263	0.0714884	390.962	0.253307	370.472	0.0364609	351.735	0.148	372.364	0.070483	345.31	0.11466	357.422	0.111309	349.284	0.199359	351.876	0.0194297	345.31	0.11466	357.422	0.111309	348.181	0.204953
337.76	0.173118	367.322	0.0156409	379.376	0.0355997	352.163	0.0195306	343.603	0.130322	381.473	0.00551311	361.38	0.027033	389.193	0.0854716	357.248	0.122849	367.635	0.0466848	346.782	0.256525	369.416	0.0590967	358.781	0.0643385	364.565	0.0740417	391.245	0.259242	370.76	0.0371464	352.023	0.148767	372.629	0.0712254	345.621	0.114189	357.725	0.113874	349.573	0.200662	352.163	0.0195306	345.621	0.114189	357.725	0.113874	348.484	0.206576
338.06	0.175421	367.606	0.0157931	379.66	0.0358559	352.45	0.0196273	343.891	0.129816	381.752	0.00581831	361.665	0.0270478	389.45	0.0875873	357.544	0.123561	367.933	0.0483397	347.065	0.258146	369.711	0.0604412	359.081	0.0662646	364.868	0.0766947	391.528	0.265231	371.048	0.0378519	352.312	0.149511	372.894	0.0719478	345.931	0.113719	358.028	0.116528	349.863	0.201938	352.45	0.0196273	345.931	0.113719	358.028	0.116528	348.788	0.208206
338.36	0.177745	367.889	0.0159459	379.944	0.0361001	352.737	0.0197199	344.179	0.129255	382.03	0.00614145	361.951	0.0270511	389.707	0.0897239	357.84	0.124271	368.231	0.0500643	347.349	0.259749	370.006	0.0618318	359.382	0.0682691	365.17	0.0794503	391.811	0.27127	371.336	0.0385787	352.601	0.150231	373.159	0.0726498	346.242	0.113254	358.331	0.119274	350.152	0.203189	352.737	0.0197199	346.242	0.113254	358.331	0.119274	349.091	0.209847
338.66	0.180091	368.173	0.0160997	380.227	0.0363324	353.025	0.0198085	344.467	0.128641	382.309	0.00648353	362.236	0.0270428	389.964	0.0918805	358.137	0.124982	368.529	0.0518611	347.633	0.261338	370.302	0.0632707	359.682	0.0703553	365.473	0.0823113	392.094	0.277356	371.624	0.0393283	352.889	0.150929	373.423	0.0733307	346.552	0.1128	358.634	0.122115	350.441	0.204418	353.025	0.0198085	346.552	0.1128	358.634	0.122115	349.395	0.211503
338.96	0.182462	368.456	0.0162551	380.511	0.036553	353.312	0.0198933	344.755	0.127974	382.588	0.0068456	362.521	0.0270232	390.22	0.0940562	358.433	0.125697	368.826	0.0537329	347.917	0.262916	370.597	0.0647603	359.983	0.0725261	365.775	0.0852807	392.377	0.283487	371.912	0.0401018	353.178	0.151607	373.688	0.07399	346.863	0.112361	358.937	0.125055	350.731	0.205628	353.312	0.0198933	346.863	0.112361	358.937	0.125055	349.698	0.213179
339.26	0.184858	368.74	0.0164124	380.795	0.0367618	353.599	0.0199745	345.042	0.127257	382.867	0.00722874	362.807	0.0269924	390.477	0.0962502	358.729	0.12642	369.124	0.0556822	348.2	0.264487	370.892	0.066303	360.283	0.0747846	366.077	0.0883611	392.661	0.289658	372.2	0.0409009	353.466	0.152267	373.953	0.0746272	347.173	0.111943	359.241	0.128097	351.02	0.206821	353.599	0.0199745	347.173	0.111943	359.241	0.128097	350.002	0.214877
339.56	0.187281	369.023	0.0165723	381.078	0.0369592	353.887	0.0200522	345.33	0.12649	383.145	0.0076341	363.092	0.0269506	390.734	0.0984615	359.025	0.127153	369.422	0.0577118	348.484	0.266055	371.187	0.0679012	360.584	0.077134	366.38	0.0915554	392.944	0.295867	372.488	0.0417269	353.755	0.15291	374.218	0.0752419	347.484	0.111549	359.544	0.131243	351.31	0.208002	353.887	0.0200522	347.484	0.111549	359.544	0.131243	350.305	0.216602
339.859	0.189734	369.307	0.0167353	381.362	0.0371453	354.174	0.0201267	345.618	0.125676	383.424	0.00806287	363.377	0.0268982	390.991	0.100689	359.321	0.127901	369.72	0.0598243	348.768	0.267623	371.482	0.0695572	360.884	0.0795772	366.682	0.0948662	393.227	0.302111	372.776	0.0425814	354.043	0.153538	374.482	0.0758337	347.794	0.111185	359.847	0.134497	351.599	0.209173	354.174	0.0201267	347.794	0.111185	359.847	0.134497	350.609	0.21836
340.159	0.192217	369.59	0.0169019	381.646	0.0373203	354.461	0.0201982	345.906	0.124815	383.703	0.0085163	363.663	0.0268354	391.248	0.102933	359.618	0.128668	370.017	0.0620225	349.052	0.269197	371.778	0.0712738	361.185	0.0821175	366.985	0.0982959	393.51	0.308386	373.064	0.0434661	354.332	0.154152	374.747	0.0764021	348.105	0.110856	360.15	0.137861	351.889	0.210337	354.461	0.0201982	348.105	0.110856	360.15	0.137861	350.912	0.220154
340.459	0.194734	369.874	0.0170729	381.93	0.0374846	354.749	0.0202669	346.194	0.12391	383.981	0.00899569	363.948	0.0267624	391.505	0.10519	359.914	0.129456	370.315	0.0643092	349.335	0.27078	372.073	0.0730532	361.485	0.0847578	367.287	0.101847	393.793	0.314688	373.352	0.0443825	354.62	0.154756	375.012	0.0769469	348.415	0.110567	360.453	0.141338	352.178	0.2115	354.749	0.0202669	348.415	0.110567	360.453	0.141338	351.216	0.221989
340.759	0.197286	370.157	0.017249	382.213	0.0376385	355.036	0.0203331	346.482	0.122962	384.26	0.00950237	364.233	0.0266796	391.761	0.107462	360.21	0.130271	370.613	0.066687	349.619	0.272377	372.368	0.0748982	361.786	0.0875013	367.59	0.105522	394.076	0.321013	373.64	0.0453324	354.909	0.15535	375.277	0.0774678	348.726	0.110325	360.756	0.144932	352.467	0.212664	355.036	0.0203331	348.726	0.110325	360.756	0.144932	351.519	0.223871
341.059	0.199875	370.44	0.0174308	382.497	0.0377825	355.323	0.0203971	346.77	0.121973	384.539	0.0100378	364.519	0.0265874	392.018	0.109746	360.506	0.131115	370.911	0.0691586	349.903	0.273991	372.663	0.0768112	362.086	0.090351	367.892	0.109324	394.359	0.327358	373.928	0.0463174	355.197	0.155937	375.541	0.0779646	349.036	0.110134	361.059	0.148643	352.757	0.213833	355.323	0.0203971	349.036	0.110134	361.059	0.148643	351.823	0.225803
341.359	0.202504	370.724	0.0176192	382.781	0.037917	355.61	0.0204591	347.058	0.120945	384.818	0.0106033	364.804	0.0264861	392.275	0.112041	360.803	0.131994	371.208	0.0717267	350.186	0.275628	372.958	0.0787949	362.387	0.0933099	368.195	0.113253	394.642	0.333718	374.216	0.0473393	355.486	0.156519	375.806	0.0784371	349.347	0.109999	361.362	0.152475	353.046	0.215012	355.61	0.0204591	349.347	0.109999	361.362	0.152475	352.126	0.227791
341.659	0.205174	371.007	0.017815	383.064	0.0380425	355.898	0.0205194	347.346	0.119879	385.096	0.0112006	365.089	0.0263761	392.532	0.114348	361.099	0.132912	371.506	0.0743941	350.47	0.277293	373.253	0.0808519	362.688	0.0963809	368.497	0.117313	394.925	0.340091	374.504	0.0483999	355.774	0.157098	376.071	0.0788852	349.657	0.109927	361.665	0.15643	353.336	0.216205	355.898	0.0205194	349.657	0.109927	361.665	0.15643	352.43	0.229839
341.958	0.207888	371.291	0.0180191	383.348	0.0381596	356.185	0.0205785	347.634	0.118779	385.375	0.0118312	365.374	0.0262579	392.789	0.116664	361.395	0.133874	371.804	0.0771635	350.754	0.27899	373.549	0.0829846	362.988	0.0995671	368.8	0.121504	395.208	0.34647	374.792	0.0495012	356.063	0.157677	376.336	0.0793088	349.968	0.109923	361.969	0.16051	353.625	0.217417	356.185	0.0205785	349.968	0.109923	361.969	0.16051	352.733	0.231954
342.258	0.210649	371.574	0.0182324	383.632	0.0382689	356.472	0.0206366	347.922	0.117645	385.654	0.0124966	365.66	0.0261319	393.045	0.118989	361.691	0.134883	372.102	0.0800373	351.038	0.280723	373.844	0.0851958	363.289	0.102871	369.102	0.12583	395.491	0.352853	375.08	0.0506449	356.351	0.158258	376.6	0.079708	350.278	0.109993	362.272	0.164716	353.915	0.218652	356.472	0.0206366	350.278	0.109993	362.272	0.164716	353.037	0.23414
342.558	0.213458	371.858	0.018456	383.915	0.0383712	356.76	0.0206942	348.21	0.116481	385.933	0.0131987	365.945	0.0259987	393.302	0.121321	361.988	0.135945	372.399	0.0830183	351.321	0.282498	374.139	0.0874879	363.589	0.106296	369.405	0.13029	395.774	0.359235	375.368	0.051833	356.64	0.158843	376.865	0.0800826	350.589	0.110142	362.575	0.169051	354.204	0.219914	356.76	0.0206942	350.589	0.110142	362.575	0.169051	353.34	0.236402
342.858	0.216319	372.141	0.0186909	384.199	0.0384671	357.047	0.0207515	348.498	0.115287	386.211	0.0139392	366.23	0.0258586	393.559	0.123661	362.284	0.137063	372.697	0.086109	351.605	0.28432	374.434	0.0898636	363.89	0.109845	369.707	0.134887	396.057	0.365611	375.656	0.0530674	356.928	0.159435	377.13	0.0804329	350.899	0.110376	362.878	0.173515	354.493	0.221209	357.047	0.0207515	350.899	0.110376	362.878	0.173515	353.644	0.238745
343.158	0.219234	372.425	0.0189382	384.483	0.0385574	357.334	0.0208091	348.786	0.114067	386.49	0.0147198	366.516	0.0257124	393.816	0.126006	362.58	0.138244	372.995	0.0893119	351.889	0.286193	374.729	0.0923254	364.19	0.11352	370.009	0.139621	396.34	0.371977	375.944	0.0543502	357.217	0.160036	377.395	0.0807591	351.21	0.110701	363.181	0.17811	354.783	0.222541	357.334	0.0208091	351.21	0.110701	363.181	0.17811	353.947	0.241175
343.458	0.222206	372.708	0.019199	384.766	0.0386431	357.622	0.0208674	349.073	0.112821	386.769	0.0155426	366.801	0.0255604	394.073	0.128357	362.876	0.139492	373.293	0.0926295	352.172	0.288122	375.024	0.0948757	364.491	0.117323	370.312	0.144494	396.624	0.378328	376.232	0.0556834	357.505	0.160649	377.659	0.0810613	351.521	0.111122	363.484	0.182836	355.072	0.223915	357.622	0.0208674	351.521	0.111122	363.484	0.182836	354.251	0.243697
343.758	0.225237	372.992	0.0194746	385.05	0.0387251	357.909	0.0209268	349.361	0.111554	387.048	0.0164094	367.086	0.0254034	394.329	0.130711	363.172	0.140812	373.59	0.0960641	352.456	0.290113	375.32	0.0975171	364.791	0.121258	370.614	0.149505	396.907	0.38466	376.52	0.0570689	357.794	0.161277	377.924	0.0813398	351.831	0.111646	363.787	0.187696	355.362	0.225336	357.909	0.0209268	351.831	0.111646	363.787	0.187696	354.554	0.246316
344.057	0.22833	373.275	0.0197663	385.334	0.0388043	358.196	0.0209878	349.649	0.110266	387.326	0.0173223	367.372	0.0252419	394.586	0.133069	363.469	0.142209	373.888	0.099618	352.74	0.292169	375.615	0.100252	365.092	0.125326	370.917	0.154656	397.19	0.390968	376.808	0.0585089	358.082	0.161922	378.189	0.081595	352.142	0.112278	364.09	0.192688	355.651	0.22681	358.196	0.0209878	352.142	0.112278	364.09	0.192688	354.858	0.249038
344.357	0.231488	373.559	0.0200753	385.618	0.0388817	358.483	0.021051	349.937	0.10896	387.605	0.0182833	367.657	0.0250765	394.843	0.135428	363.765	0.143688	374.186	0.103294	353.024	0.294297	375.91	0.103082	365.392	0.12953	371.219	0.159947	397.473	0.397248	377.096	0.0600055	358.371	0.162587	378.454	0.0818274	352.452	0.113023	364.394	0.197813	355.941	0.228342	358.483	0.021051	352.452	0.113023	364.394	0.197813	355.161	0.251866
344.657	0.234713	373.842	0.0204032	385.901	0.0389587	358.771	0.0211168	350.225	0.107638	387.884	0.0192946	367.942	0.024908	395.1	0.13779	364.061	0.145254	374.484	0.107093	353.307	0.2965	376.205	0.106011	365.693	0.133872	371.522	0.165376	397.756	0.403494	377.384	0.0615608	358.66	0.163275	378.718	0.0820373	352.763	0.113888	364.697	0.203071	356.23	0.229935	358.771	0.0211168	352.763	0.113888	364.697	0.203071	355.465	0.254807
344.957	0.238009	374.126	0.0207514	386.185	0.0390362	359.058	0.0211859	350.513	0.106303	388.163	0.0203585	368.227	0.0247371	395.357	0.140152	364.357	0.146912	374.781	0.111018	353.591	0.298784	376.5	0.10904	365.993	0.138353	371.824	0.170945	398.039	0.409701	377.672	0.0631768	358.948	0.163988	378.983	0.0822255	353.073	0.114877	365	0.208461	356.519	0.231597	359.058	0.0211859	353.073	0.114877	365	0.208461	355.768	0.257865
345.257	0.241379	374.409	0.0211214	386.469	0.0391155	359.345	0.0212589	350.801	0.104957	388.441	0.0214771	368.513	0.0245644	395.613	0.142514	364.654	0.148668	375.079	0.11507	353.875	0.301153	376.796	0.112171	366.294	0.142977	372.127	0.176653	398.322	0.415866	377.96	0.0648558	359.237	0.16473	379.248	0.0823924	353.384	0.115997	365.303	0.213983	356.809	0.233332	359.345	0.0212589	353.384	0.115997	365.303	0.213983	356.072	0.261045
345.557	0.244825	374.693	0.0215149	386.752	0.0391981	359.633	0.0213363	351.089	0.103602	388.72	0.0226528	368.798	0.0243908	395.87	0.144875	364.95	0.150526	375.377	0.119253	354.158	0.303612	377.091	0.115407	366.594	0.147743	372.429	0.182498	398.605	0.421982	378.248	0.0665998	359.525	0.165503	379.513	0.0825387	353.694	0.117253	365.606	0.219636	357.098	0.235145	359.633	0.0213363	353.694	0.117253	365.606	0.219636	356.375	0.264352
345.857	0.24835	374.976	0.0219335	387.036	0.0392852	359.92	0.0214189	351.377	0.10224	388.999	0.0238881	369.083	0.0242169	396.127	0.147234	365.246	0.152492	375.675	0.123566	354.442	0.306165	377.386	0.118749	366.895	0.152655	372.732	0.188479	398.888	0.428046	378.536	0.068411	359.814	0.16631	379.777	0.0826654	354.005	0.11865	365.909	0.225418	357.388	0.237041	359.92	0.0214189	354.005	0.11865	365.909	0.225418	356.679	0.267791
346.156	0.251957	375.26	0.022379	387.32	0.0393783	360.207	0.0215073	351.665	0.100875	389.278	0.0251854	369.369	0.0240437	396.384	0.149591	365.542	0.15457	375.972	0.128013	354.726	0.308817	377.681	0.1222	367.196	0.157712	373.034	0.194595	399.171	0.434052	378.824	0.0702916	360.102	0.167154	380.042	0.0827731	354.315	0.120193	366.212	0.231328	357.677	0.239026	360.207	0.0215073	354.315	0.120193	366.212	0.231328	356.982	0.271366
346.456	0.255648	375.543	0.0228532	387.603	0.0394789	360.495	0.0216022	351.953	0.0995069	389.556	0.0265473	369.654	0.0238718	396.641	0.151946	365.839	0.156766	376.27	0.132593	355.01	0.311571	377.976	0.125761	367.496	0.162917	373.337	0.200844	399.454	0.439995	379.112	0.0722437	360.391	0.168039	380.307	0.0828628	354.626	0.121888	366.515	0.237363	357.967	0.241105	360.495	0.0216022	354.626	0.121888	366.515	0.237363	357.286	0.275081
346.756	0.259428	375.827	0.023358	387.887	0.0395886	360.782	0.0217044	352.241	0.0981396	389.835	0.0279763	369.939	0.0237023	396.897	0.154297	366.135	0.159085	376.568	0.13731	355.293	0.314433	378.271	0.129433	367.797	0.168269	373.639	0.207224	399.737	0.445871	379.4	0.0742695	360.679	0.168966	380.572	0.0829354	354.936	0.12374	366.818	0.243522	358.256	0.243282	360.782	0.0217044	354.936	0.12374	366.818	0.243522	357.589	0.27894
347.056	0.263298	376.11	0.0238953	388.171	0.0397091	361.069	0.0218147	352.529	0.0967749	390.114	0.0294751	370.225	0.0235359	397.154	0.156644	366.431	0.161531	376.866	0.142163	355.577	0.317406	378.567	0.133218	368.097	0.173771	373.941	0.213732	400.02	0.451675	379.688	0.0763711	360.968	0.16994	380.836	0.0829921	355.247	0.125753	367.122	0.249801	358.546	0.245563	361.069	0.0218147	355.247	0.125753	367.122	0.249801	357.893	0.282948
347.356	0.267262	376.393	0.0244673	388.455	0.0398421	361.356	0.0219339	352.816	0.0954152	390.393	0.0310464	370.51	0.0233736	397.411	0.158987	366.727	0.16411	377.163	0.147154	355.861	0.320494	378.862	0.137118	368.398	0.179422	374.244	0.220366	400.304	0.457402	379.976	0.0785507	361.256	0.170962	381.101	0.083034	355.557	0.127932	367.425	0.256197	358.835	0.247953	361.356	0.0219339	355.557	0.127932	367.425	0.256197	358.196	0.287109
347.656	0.271322	376.677	0.025076	388.738	0.0399893	361.644	0.0220628	353.104	0.0940627	390.671	0.032693	370.795	0.0232163	397.668	0.161326	367.023	0.166826	377.461	0.152284	356.145	0.3237	379.157	0.141134	368.698	0.185222	374.546	0.227122	400.587	0.463046	380.264	0.0808102	361.545	0.172036	381.366	0.0830622	355.868	0.130283	367.728	0.262708	359.124	0.250456	361.644	0.0220628	355.868	0.130283	367.728	0.262708	358.5	0.291425
347.956	0.275481	376.96	0.0257237	389.022	0.0401527	361.931	0.0222025	353.392	0.0927198	390.95	0.0344177	371.081	0.023065	397.925	0.163659	367.32	0.169685	377.759	0.157554	356.428	0.327029	379.452	0.145267	368.999	0.191172	374.849	0.233996	400.87	0.468605	380.552	0.083152	361.833	0.173166	381.631	0.083078	356.178	0.132808	368.031	0.269328	359.414	0.253078	361.931	0.0222025	356.178	0.132808	368.031	0.269328	358.803	0.2959
348.255	0.279741	377.244	0.0264125	389.306	0.0403342	362.218	0.0223538	353.68	0.0913887	391.229	0.0362235	371.366	0.0229207	398.181	0.165987	367.616	0.17269	378.057	0.162963	356.712	0.330482	379.747	0.149518	369.299	0.197271	375.151	0.240986	401.153	0.474072	380.84	0.0855779	362.122	0.174353	381.895	0.0830829	356.489	0.135513	368.334	0.276054	359.703	0.255822	362.218	0.0223538	356.489	0.135513	368.334	0.276054	359.107	0.300538
348.555	0.284105	377.527	0.0271449	389.589	0.0405358	362.506	0.0225177	353.968	0.0900716	391.508	0.0381133	371.651	0.0227843	398.438	0.168309	367.912	0.175846	378.354	0.168513	356.996	0.334064	380.042	0.153887	369.6	0.20352	375.454	0.248087	401.436	0.479444	381.128	0.0880901	362.41	0.175602	382.16	0.0830781	356.799	0.138401	368.637	0.282882	359.993	0.258694	362.506	0.0225177	356.799	0.138401	368.637	0.282882	359.41	0.305341
348.855	0.288576	377.811	0.0279234	389.873	0.0407595	362.793	0.0226952	354.256	0.0887707	391.786	0.0400901	371.936	0.022657	398.695	0.170626	368.208	0.179158	378.652	0.174203	357.279	0.337777	380.338	0.158376	369.9	0.209917	375.756	0.255295	401.719	0.484716	381.416	0.0906907	362.699	0.176914	382.425	0.0830652	357.11	0.141476	368.94	0.289806	360.282	0.261697	362.793	0.0226952	357.11	0.141476	368.94	0.289806	359.714	0.310312
349.155	0.293156	378.094	0.0287504	390.157	0.0410075	363.08	0.0228874	354.544	0.0874883	392.065	0.0421568	372.222	0.0225399	398.952	0.172937	368.505	0.18263	378.95	0.180034	357.563	0.341623	380.633	0.162984	370.201	0.216461	376.059	0.262604	402.002	0.489883	381.704	0.0933814	362.987	0.178294	382.69	0.0830458	357.42	0.144743	369.243	0.296822	360.572	0.264836	363.08	0.0228874	357.42	0.144743	369.243	0.296822	360.017	0.315453
349.455	0.297848	378.378	0.0296285	390.44	0.041282	363.368	0.0230955	354.832	0.0862266	392.344	0.0443167	372.507	0.0224339	399.209	0.175242	368.801	0.186266	379.248	0.186006	357.847	0.345606	380.928	0.167712	370.501	0.223151	376.361	0.270009	402.285	0.494942	381.992	0.0961645	363.276	0.179744	382.954	0.0830216	357.731	0.148203	369.546	0.303923	360.861	0.268115	363.368	0.0230955	357.731	0.148203	369.546	0.303923	360.321	0.320766
349.755	0.302653	378.661	0.0305604	390.724	0.0415853	363.655	0.0233206	355.12	0.0849877	392.623	0.0465728	372.792	0.0223404	399.465	0.177541	369.097	0.19007	379.545	0.192117	358.131	0.349726	381.223	0.17256	370.802	0.229986	376.664	0.277506	402.568	0.499889	382.28	0.0990416	363.564	0.181267	383.219	0.0829942	358.041	0.15186	369.85	0.311104	361.15	0.271537	363.655	0.0233206	358.041	0.15186	369.85	0.311104	360.624	0.326252
350.055	0.307573	378.945	0.0315488	391.008	0.0419197	363.942	0.0235639	355.408	0.0837738	392.901	0.0489284	373.078	0.0222604	399.722	0.179835	369.393	0.194045	379.843	0.198367	358.414	0.353986	381.518	0.177529	371.102	0.236965	376.966	0.285087	402.851	0.504718	382.568	0.102015	363.853	0.182866	383.484	0.0829655	358.352	0.155717	370.153	0.318358	361.44	0.275106	363.942	0.0235639	358.352	0.155717	370.153	0.318358	360.928	0.331914
350.354	0.312612	379.228	0.0325967	391.291	0.0422877	364.229	0.0238267	355.696	0.0825871	393.18	0.0513866	373.363	0.0221952	399.979	0.182124	369.69	0.198196	380.141	0.204757	358.698	0.358388	381.813	0.182617	371.403	0.244084	377.269	0.292748	403.134	0.509427	382.856	0.105086	364.142	0.184544	383.748	0.0829373	358.663	0.159776	370.456	0.325678	361.729	0.278826	364.229	0.0238267	358.663	0.159776	370.456	0.325678	361.231	0.337752
350.654	0.317769	379.512	0.0337069	391.575	0.0426917	364.517	0.0241104	355.984	0.0814296	393.459	0.0539506	373.648	0.0221459	400.236	0.184407	369.986	0.202525	380.439	0.211283	358.982	0.362933	382.109	0.187824	371.704	0.251342	377.571	0.30048	403.417	0.514011	383.143	0.108256	364.43	0.186304	384.013	0.0829115	358.973	0.164041	370.759	0.333059	362.019	0.2827	364.517	0.0241104	358.973	0.164041	370.759	0.333059	361.534	0.343767
350.954	0.323048	379.795	0.0348825	391.859	0.0431343	364.804	0.0244162	356.272	0.0803035	393.737	0.0566237	373.934	0.0221139	400.493	0.186686	370.282	0.207036	380.737	0.217946	359.265	0.367621	382.404	0.19315	372.004	0.258735	377.873	0.308278	403.7	0.518468	383.431	0.111528	364.719	0.18815	384.278	0.0828902	359.284	0.168511	371.062	0.340492	362.308	0.28673	364.804	0.0244162	359.284	0.168511	371.062	0.340492	361.838	0.349959
351.254	0.328448	380.079	0.0361265	392.143	0.043618	365.091	0.0247457	356.56	0.0792109	394.016	0.0594093	374.219	0.0221005	400.749	0.188961	370.578	0.211731	381.034	0.224744	359.549	0.372453	382.699	0.198593	372.305	0.266263	378.176	0.316135	403.983	0.522793	383.719	0.114903	365.007	0.190083	384.543	0.0828755	359.594	0.17319	371.365	0.347969	362.598	0.29092	365.091	0.0247457	359.594	0.17319	371.365	0.347969	362.141	0.356329
351.554	0.333973	380.362	0.0374421	392.426	0.0441456	365.379	0.0251004	356.847	0.0781538	394.295	0.0623106	374.504	0.022107	401.006	0.191232	370.874	0.216614	381.332	0.231676	359.833	0.377431	382.994	0.204153	372.605	0.27392	378.478	0.324042	404.267	0.526984	384.007	0.118383	365.296	0.192107	384.807	0.0828695	359.905	0.178078	371.668	0.355484	362.887	0.295272	365.379	0.0251004	359.905	0.178078	371.668	0.355484	362.445	0.362876
351.854	0.339622	380.646	0.0388325	392.71	0.0447198	365.666	0.0254817	357.135	0.0771344	394.574	0.065331	374.79	0.0221348	401.263	0.1935	371.171	0.221687	381.63	0.238738	360.117	0.382553	383.289	0.209828	372.906	0.281704	378.781	0.331993	404.55	0.531037	384.295	0.121968	365.584	0.194225	385.072	0.0828744	360.215	0.183176	371.971	0.363027	363.176	0.299787	365.666	0.0254817	360.215	0.183176	371.971	0.363027	362.748	0.369599
352.154	0.345397	380.929	0.040301	392.994	0.0453433	365.953	0.0258913	357.423	0.0761546	394.852	0.0684737	375.075	0.0221852	401.52	0.195766	371.467	0.226952	381.928	0.24593	360.4	0.387821	383.585	0.215617	373.206	0.289611	379.083	0.339978	404.833	0.534949	384.583	0.125661	365.873	0.196439	385.337	0.0828925	360.526	0.188486	372.274	0.37059	363.466	0.304468	365.953	0.0258913	360.526	0.188486	372.274	0.37059	363.052	0.376497
352.454	0.351299	381.213	0.0418511	393.277	0.0460191	366.241	0.0263309	357.711	0.0752165	395.131	0.0717421	375.36	0.0222598	401.777	0.19803	371.763	0.232412	382.225	0.253248	360.684	0.393232	383.88	0.221518	373.507	0.297636	379.386	0.347991	405.116	0.538719	384.871	0.129463	366.161	0.198752	385.602	0.0829262	360.836	0.194006	372.578	0.378165	363.755	0.309317	366.241	0.0263309	360.836	0.194006	372.578	0.378165	363.355	0.38357
352.753	0.357327	381.496	0.0434862	393.561	0.0467501	366.528	0.0268023	357.999	0.0743221	395.41	0.0751396	375.645	0.02236	402.033	0.200293	372.059	0.238067	382.523	0.260692	360.968	0.398788	384.175	0.22753	373.807	0.305776	379.688	0.356021	405.399	0.542343	385.159	0.133376	366.45	0.201168	385.866	0.0829779	361.147	0.199737	372.881	0.385742	364.045	0.314335	366.528	0.0268023	361.147	0.199737	372.881	0.385742	363.659	0.390814
353.053	0.363482	381.78	0.0452099	393.845	0.0475392	366.815	0.0273071	358.287	0.0734735	395.689	0.0786693	375.931	0.0224873	402.29	0.202557	372.356	0.24392	382.821	0.268256	361.251	0.404485	384.47	0.23365	374.108	0.314027	379.991	0.364061	405.682	0.545818	385.447	0.137399	366.738	0.203688	386.131	0.0830501	361.457	0.205679	373.184	0.393312	364.334	0.319523	366.815	0.0273071	361.457	0.205679	373.184	0.393312	363.962	0.398228
353.353	0.369765	382.063	0.0470257	394.128	0.0483894	367.103	0.0278473	358.575	0.0726726	395.967	0.0823347	376.216	0.0226433	402.547	0.204822	372.652	0.249971	383.119	0.27594	361.535	0.410324	384.765	0.239875	374.408	0.322382	380.293	0.372102	405.965	0.549144	385.735	0.141536	367.027	0.206316	386.396	0.0831453	361.768	0.211831	373.487	0.400867	364.624	0.324881	367.103	0.0278473	361.768	0.211831	373.487	0.400867	364.266	0.40581
353.653	0.376174	382.346	0.0489375	394.412	0.0493038	367.39	0.0284249	358.863	0.0719215	396.246	0.0861391	376.501	0.0228297	402.804	0.207089	372.948	0.256222	383.416	0.283738	361.819	0.416302	385.06	0.246204	374.709	0.330837	380.596	0.380133	406.248	0.552318	386.023	0.145786	367.315	0.209053	386.661	0.0832662	362.078	0.21819	373.79	0.408395	364.913	0.33041	367.39	0.0284249	362.078	0.21819	373.79	0.408395	364.569	0.413555
353.953	0.38271	382.63	0.0509488	394.696	0.0502856	367.677	0.0290417	359.151	0.0712221	396.525	0.0900855	376.787	0.023048	403.061	0.209359	373.244	0.262673	383.714	0.291649	362.103	0.422418	385.356	0.252634	375.009	0.339387	380.898	0.388147	406.531	0.555338	386.311	0.150151	367.604	0.211904	386.925	0.0834153	362.389	0.224756	374.093	0.415888	365.202	0.33611	367.677	0.0290417	362.389	0.224756	374.093	0.415888	364.873	0.421462
354.253	0.389371	382.913	0.0530635	394.98	0.0513379	367.964	0.0297	359.439	0.0705765	396.804	0.0941774	377.072	0.0232999	403.317	0.211634	373.54	0.269325	384.012	0.299669	362.386	0.428668	385.651	0.259162	375.31	0.348025	381.2	0.396132	406.814	0.558203	386.599	0.154632	367.892	0.214869	387.19	0.0835955	362.699	0.231526	374.396	0.423335	365.492	0.341982	367.964	0.0297	362.699	0.231526	374.396	0.423335	365.176	0.429526
354.553	0.396157	383.197	0.0552855	395.263	0.0524639	368.252	0.0304018	359.727	0.0699867	397.082	0.0984177	377.357	0.0235872	403.574	0.213915	373.837	0.276177	384.31	0.307792	362.67	0.435052	385.946	0.265784	375.61	0.356746	381.503	0.40408	407.097	0.560912	386.887	0.159229	368.181	0.217952	387.455	0.0838095	363.01	0.238498	374.699	0.430727	365.781	0.348024	368.252	0.0304018	363.01	0.238498	374.699	0.430727	365.48	0.437743
354.852	0.403066	383.48	0.0576187	395.547	0.0536669	368.539	0.0311493	360.015	0.0694546	397.361	0.10281	377.643	0.0239117	403.831	0.216204	374.133	0.283229	384.607	0.316017	362.954	0.441565	386.241	0.272498	375.911	0.365544	381.805	0.411981	407.38	0.563465	387.175	0.163943	368.469	0.221155	387.72	0.0840601	363.32	0.245669	375.002	0.438053	366.071	0.354235	368.539	0.0311493	363.32	0.245669	375.002	0.438053	365.783	0.446108
355.152	0.410097	383.764	0.0600671	395.831	0.0549502	368.826	0.0319449	360.303	0.0689824	397.64	0.107356	377.928	0.0242751	404.088	0.218501	374.429	0.290481	384.905	0.324337	363.238	0.448204	386.536	0.2793	376.212	0.374412	382.108	0.419824	407.663	0.565859	387.463	0.168775	368.758	0.22448	387.984	0.0843502	363.631	0.253036	375.306	0.445304	366.36	0.360615	368.826	0.0319449	363.631	0.253036	375.306	0.445304	366.087	0.454618
355.452	0.417248	384.047	0.0626348	396.114	0.0563171	369.114	0.0327908	360.59	0.0685719	397.919	0.112061	378.213	0.0246794	404.345	0.220809	374.725	0.297932	385.203	0.33275	363.521	0.454967	386.831	0.286187	376.512	0.383344	382.41	0.427599	407.947	0.568095	387.751	0.173726	369.046	0.227929	388.249	0.0846828	363.941	0.260594	375.609	0.452468	366.65	0.367162	369.114	0.0327908	363.941	0.260594	375.609	0.452468	366.39	0.463266
355.752	0.424517	384.331	0.0653257	396.398	0.0577709	369.401	0.0336896	360.878	0.0682253	398.197	0.116925	378.499	0.0251265	404.601	0.223128	375.022	0.30558	385.501	0.341249	363.805	0.461849	387.127	0.293154	376.813	0.392332	382.713	0.435297	408.23	0.570173	388.039	0.178795	369.335	0.231505	388.514	0.0850608	364.252	0.268339	375.912	0.459536	366.939	0.373875	369.401	0.0336896	364.252	0.268339	375.912	0.459536	366.694	0.472047
356.052	0.431901	384.614	0.0681439	396.682	0.0593151	369.688	0.0346436	361.166	0.0679446	398.476	0.121954	378.784	0.0256183	404.858	0.225461	375.318	0.313424	385.798	0.349831	364.089	0.468846	387.422	0.300198	377.113	0.401369	383.015	0.442907	408.513	0.572092	388.327	0.183984	369.623	0.235209	388.779	0.0854872	364.562	0.276268	376.215	0.466497	367.228	0.38075	369.688	0.0346436	364.562	0.276268	376.215	0.466497	366.997	0.480955
356.352	0.439398	384.898	0.0710937	396.965	0.0609531	369.976	0.0356556	361.454	0.0677319	398.755	0.127148	379.069	0.0261568	405.115	0.227809	375.614	0.321462	386.096	0.358489	364.372	0.475954	387.717	0.307315	377.414	0.410449	383.318	0.450418	408.796	0.573853	388.615	0.189291	369.912	0.239044	389.043	0.0859651	364.873	0.284373	376.518	0.473341	367.518	0.387786	369.976	0.0356556	364.873	0.284373	376.518	0.473341	367.301	0.489983
356.652	0.447005	385.181	0.0741792	397.249	0.0626882	370.263	0.036728	361.742	0.0675892	399.034	0.132511	379.354	0.0267441	405.372	0.230174	375.91	0.329692	386.394	0.36722	364.656	0.48317	388.012	0.3145	377.714	0.419563	383.62	0.457821	409.079	0.575456	388.903	0.194719	370.201	0.243012	389.308	0.0864976	365.183	0.292651	376.821	0.480058	367.807	0.394979	370.263	0.036728	365.183	0.292651	376.821	0.480058	367.604	0.499126
356.951	0.454717	385.465	0.0774045	397.533	0.0645239	370.55	0.0378637	362.03	0.0675186	399.312	0.138045	379.64	0.0273824	405.629	0.232558	376.207	0.338112	386.692	0.376018	364.94	0.490487	388.307	0.32175	378.015	0.428703	383.923	0.465106	409.362	0.576902	389.191	0.200265	370.489	0.247114	389.573	0.0870878	365.494	0.301096	377.124	0.486637	368.097	0.402328	370.55	0.0378637	365.494	0.301096	377.124	0.486637	367.908	0.508376
357.251	0.462533	385.748	0.0807739	397.817	0.0664637	370.837	0.0390654	362.318	0.0675224	399.591	0.143752	379.925	0.0280737	405.885	0.234962	376.503	0.346718	386.989	0.384876	365.224	0.497901	388.603	0.329059	378.315	0.437862	384.225	0.472262	409.645	0.578192	389.479	0.205931	370.778	0.251351	389.838	0.0877388	365.804	0.3097	377.427	0.493069	368.386	0.409828	370.837	0.0390654	365.804	0.3097	377.427	0.493069	368.211	0.517727
357.551	0.470447	386.032	0.0842916	398.1	0.068511	371.125	0.040336	362.606	0.0676026	399.87	0.149635	380.21	0.0288203	406.142	0.237389	376.799	0.355508	387.287	0.39379	365.507	0.505408	388.898	0.336422	378.616	0.447032	384.528	0.479279	409.928	0.579327	389.767	0.211716	371.066	0.255727	390.102	0.0884538	366.115	0.318457	377.73	0.499344	368.676	0.417475	371.125	0.040336	366.115	0.318457	377.73	0.499344	368.515	0.527169
357.851	0.478457	386.315	0.0879618	398.384	0.0706693	371.412	0.0416783	362.894	0.0677615	400.149	0.155697	380.496	0.0296245	406.399	0.239839	377.095	0.364477	387.585	0.402753	365.791	0.513	389.193	0.343837	378.916	0.456205	384.83	0.486147	410.211	0.580308	390.055	0.217621	371.355	0.260241	390.367	0.0892361	366.426	0.32736	378.034	0.505452	368.965	0.425266	371.412	0.0416783	366.426	0.32736	378.034	0.505452	368.818	0.536696
358.151	0.486556	386.599	0.0917886	398.668	0.0729419	371.699	0.0430955	363.182	0.0680012	400.427	0.161938	380.781	0.0304885	406.656	0.242316	377.391	0.373623	387.883	0.411759	366.075	0.520674	389.488	0.351296	379.217	0.465371	385.132	0.492857	410.494	0.581138	390.343	0.223643	371.643	0.264895	390.632	0.0900889	366.736	0.336401	378.337	0.511383	369.254	0.433196	371.699	0.0430955	366.736	0.336401	378.337	0.511383	369.122	0.5463
358.451	0.494741	386.882	0.0957762	398.951	0.0753324	371.987	0.0445905	363.47	0.068324	400.706	0.16836	381.066	0.0314148	406.913	0.244821	377.688	0.38294	388.18	0.420803	366.358	0.528424	389.783	0.358797	379.517	0.474524	385.435	0.499399	410.777	0.581817	390.631	0.229784	371.932	0.269691	390.897	0.0910153	367.047	0.345572	378.64	0.517128	369.544	0.441261	371.987	0.0445905	367.047	0.345572	378.64	0.517128	369.425	0.555972
358.751	0.503007	387.166	0.0999289	399.235	0.0778442	372.274	0.0461664	363.758	0.0687322	400.985	0.174966	381.352	0.0324057	407.169	0.247356	377.984	0.392426	388.478	0.429877	366.642	0.536243	390.078	0.366332	379.818	0.483653	385.737	0.505764	411.06	0.582349	390.919	0.236041	372.22	0.27463	391.161	0.0920187	367.357	0.354866	378.943	0.522678	369.833	0.449456	372.274	0.0461664	367.357	0.354866	378.943	0.522678	369.729	0.565704
359.05	0.511348	387.449	0.104251	399.519	0.0804806	372.561	0.0478265	364.046	0.0692282	401.264	0.181756	381.637	0.0334638	407.426	0.249922	378.28	0.402074	388.776	0.438976	366.926	0.544125	390.374	0.373898	380.118	0.492751	386.04	0.511941	411.343	0.582734	391.207	0.242416	372.509	0.279712	391.426	0.0931024	367.668	0.364272	379.246	0.528025	370.123	0.457775	372.561	0.0478265	367.668	0.364272	379.246	0.528025	370.032	0.575487
359.35	0.519758	387.733	0.108746	399.802	0.083245	372.849	0.0495739	364.334	0.0698142	401.542	0.188732	381.922	0.0345915	407.683	0.252523	378.576	0.411881	389.074	0.448093	367.21	0.552065	390.669	0.38149	380.419	0.501809	386.342	0.517923	411.626	0.582976	391.495	0.248905	372.797	0.284938	391.691	0.0942695	367.978	0.373782	379.549	0.533158	370.412	0.466213	372.849	0.0495739	367.978	0.373782	379.549	0.533158	370.336	0.585311
359.65	0.528233	388.016	0.113418	400.086	0.0861408	373.136	0.0514121	364.621	0.0704928	401.821	0.195895	382.207	0.0357914	407.94	0.25516	378.873	0.42184	389.371	0.457221	367.493	0.560055	390.964	0.389102	380.72	0.510819	386.645	0.5237	411.91	0.583078	391.783	0.25551	373.086	0.29031	391.956	0.0955233	368.289	0.383387	379.852	0.538071	370.702	0.474765	373.136	0.0514121	368.289	0.383387	379.852	0.538071	370.639	0.595168
359.95	0.536765	388.299	0.118272	400.37	0.0891711	373.423	0.0533442	364.909	0.0712662	402.1	0.203246	382.493	0.0370661	408.197	0.257834	379.169	0.431946	389.669	0.466354	367.777	0.568091	391.259	0.396729	381.02	0.51977	386.947	0.529265	412.193	0.583041	392.071	0.262228	373.374	0.295827	392.22	0.0968672	368.599	0.393077	380.155	0.542756	370.991	0.483424	373.423	0.0533442	368.599	0.393077	380.155	0.542756	370.943	0.605048
360.25	0.54535	388.583	0.12331	400.653	0.0923392	373.71	0.0553739	365.197	0.0721371	402.379	0.210785	382.778	0.0384182	408.453	0.260548	379.465	0.442194	389.967	0.475485	368.061	0.576164	391.554	0.404365	381.321	0.528656	387.25	0.534608	412.476	0.58287	392.359	0.269058	373.663	0.30149	392.485	0.0983042	368.91	0.402842	380.458	0.547204	371.28	0.492185	373.71	0.0553739	368.91	0.402842	380.458	0.547204	371.246	0.614942
360.55	0.553979	388.866	0.128538	400.937	0.0956483	373.998	0.0575044	365.485	0.073108	402.657	0.218513	383.063	0.0398506	408.71	0.263304	379.761	0.452577	390.265	0.484606	368.344	0.584269	391.849	0.412007	381.621	0.537466	387.552	0.539722	412.759	0.582566	392.647	0.276	373.951	0.307299	392.75	0.0998378	369.22	0.412671	380.762	0.551409	371.57	0.50104	373.998	0.0575044	369.22	0.412671	380.762	0.551409	371.55	0.624839
360.85	0.562647	389.15	0.133958	401.221	0.0991015	374.285	0.0597393	365.773	0.0741814	402.936	0.226429	383.349	0.0413659	408.967	0.266104	380.058	0.463088	390.562	0.493711	368.628	0.5924	392.145	0.419647	381.922	0.546193	387.855	0.5446	413.042	0.582134	392.935	0.28305	374.24	0.313254	393.015	0.101471	369.531	0.422554	381.065	0.555363	371.859	0.509984	374.285	0.0597393	369.531	0.422554	381.065	0.555363	371.853	0.634731
361.149	0.571347	389.433	0.139575	401.505	0.102702	374.572	0.0620821	366.061	0.0753599	403.215	0.234534	383.634	0.0429669	409.224	0.268948	380.354	0.473722	390.86	0.502793	368.912	0.600549	392.44	0.427282	382.222	0.554828	388.157	0.549235	413.325	0.581577	393.223	0.290209	374.528	0.319356	393.279	0.103207	369.841	0.432479	381.368	0.559061	372.149	0.51901	374.572	0.0620821	369.841	0.432479	381.368	0.559061	372.157	0.644607
361.449	0.580071	389.717	0.145391	401.788	0.106452	374.86	0.0645365	366.349	0.0766462	403.493	0.242827	383.919	0.0446565	409.481	0.27184	380.65	0.484471	391.158	0.511845	369.196	0.608709	392.735	0.434906	382.523	0.563362	388.46	0.55362	413.608	0.580898	393.511	0.297474	374.817	0.325603	393.544	0.105049	370.152	0.442436	381.671	0.562497	372.438	0.52811	374.86	0.0645365	370.152	0.442436	381.671	0.562497	372.46	0.654457
361.749	0.588812	390	0.151411	402.072	0.110355	375.147	0.0671059	366.637	0.0780431	403.772	0.251308	384.205	0.0464376	409.738	0.274782	380.946	0.495328	391.456	0.520859	369.479	0.616875	393.03	0.442514	382.823	0.571786	388.762	0.557749	413.891	0.580102	393.799	0.304844	375.105	0.331995	393.809	0.107001	370.462	0.452413	381.974	0.565665	372.728	0.537278	375.147	0.0671059	370.462	0.452413	381.974	0.565665	372.764	0.664272
362.049	0.597564	390.284	0.157637	402.356	0.114414	375.434	0.0697941	366.925	0.0795532	404.051	0.259976	384.49	0.048313	409.994	0.277773	381.242	0.506286	391.753	0.529829	369.763	0.625039	393.325	0.450101	383.124	0.580093	389.064	0.561615	414.174	0.579191	394.087	0.312316	375.394	0.338533	394.074	0.109064	370.773	0.462399	382.277	0.568561	373.017	0.546506	375.434	0.0697941	370.773	0.462399	382.277	0.568561	373.067	0.67404
362.349	0.606318	390.567	0.164073	402.639	0.118631	375.722	0.0726047	367.213	0.0811794	404.33	0.268829	384.775	0.0502857	410.251	0.280817	381.539	0.517337	392.051	0.538747	370.047	0.633195	393.621	0.457661	383.424	0.588275	389.367	0.565215	414.457	0.57817	394.375	0.319889	375.682	0.345213	394.338	0.111243	371.083	0.472382	382.58	0.571179	373.306	0.555786	375.722	0.0726047	371.083	0.472382	382.58	0.571179	373.371	0.683753
362.649	0.615066	390.851	0.170721	402.923	0.123009	376.009	0.0755413	367.501	0.0829245	404.608	0.277866	385.061	0.0523587	410.508	0.283916	381.835	0.528473	392.349	0.547607	370.331	0.641336	393.916	0.46519	383.725	0.596323	389.669	0.568542	414.74	0.577043	394.663	0.32756	375.971	0.352037	394.603	0.11354	371.394	0.48235	382.883	0.573516	373.596	0.565112	376.009	0.0755413	371.394	0.48235	382.883	0.573516	373.674	0.693399
362.949	0.623802	391.134	0.177585	403.207	0.127549	376.296	0.0786077	367.789	0.0847914	404.887	0.287085	385.346	0.054535	410.765	0.287069	382.131	0.539687	392.647	0.5564	370.614	0.649455	394.211	0.472683	384.025	0.604229	389.972	0.571593	415.023	0.575813	394.951	0.335327	376.26	0.359002	394.868	0.115959	371.704	0.492292	383.186	0.575569	373.885	0.574475	376.296	0.0786077	371.704	0.492292	383.186	0.575569	373.978	0.70297
363.248	0.632517	391.418	0.184666	403.49	0.132256	376.583	0.0818074	368.077	0.0867829	405.166	0.296485	385.631	0.0568176	411.022	0.290279	382.427	0.550971	392.944	0.565121	370.898	0.657547	394.506	0.480136	384.326	0.611986	390.274	0.574364	415.306	0.574485	395.239	0.343188	376.548	0.366108	395.133	0.118501	372.015	0.502194	383.49	0.577334	374.175	0.583868	376.583	0.0818074	372.015	0.502194	383.49	0.577334	374.281	0.712454
363.548	0.641203	391.701	0.191968	403.774	0.13713	376.871	0.0851442	368.365	0.088902	405.445	0.306062	385.916	0.0592096	411.278	0.293548	382.724	0.562315	393.242	0.573761	371.182	0.665604	394.801	0.487542	384.627	0.619586	390.577	0.576851	415.589	0.573063	395.527	0.35114	376.837	0.373352	395.397	0.12117	372.325	0.512046	383.793	0.57881	374.464	0.593282	376.871	0.0851442	372.325	0.512046	383.793	0.57881	374.585	0.721841
363.848	0.649852	391.985	0.199492	404.058	0.142173	377.158	0.0886218	368.652	0.0911517	405.723	0.315814	386.202	0.061714	411.535	0.296876	383.02	0.573713	393.54	0.582314	371.465	0.673621	395.096	0.494899	384.927	0.627022	390.879	0.579052	415.873	0.571552	395.815	0.359181	377.125	0.380733	395.662	0.123969	372.636	0.521834	384.096	0.579994	374.754	0.602711	377.158	0.0886218	372.636	0.521834	384.096	0.579994	374.888	0.731123
364.148	0.658457	392.268	0.207241	404.342	0.147388	377.445	0.0922438	368.94	0.093535	406.002	0.325738	386.487	0.064334	411.792	0.300265	383.316	0.585154	393.838	0.590772	371.749	0.681591	395.392	0.502201	385.228	0.634288	391.182	0.580965	416.156	0.569954	396.103	0.367308	377.414	0.388248	395.927	0.1269	372.946	0.531547	384.399	0.580885	375.043	0.612145	377.445	0.0922438	372.946	0.531547	384.399	0.580885	375.192	0.740288
364.448	0.667009	392.552	0.215215	404.625	0.152775	377.733	0.0960137	369.228	0.0960549	406.281	0.33583	386.772	0.0670726	412.049	0.303715	383.612	0.59663	394.135	0.599129	372.033	0.689507	395.687	0.509444	385.528	0.641376	391.484	0.582588	416.439	0.568275	396.391	0.375518	377.702	0.395896	396.192	0.129966	373.257	0.541173	384.702	0.581484	375.332	0.621577	377.733	0.0960137	373.257	0.541173	384.702	0.581484	375.495	0.749327
364.748	0.675501	392.835	0.223417	404.909	0.158337	378.02	0.0999352	369.516	0.0987144	406.56	0.346088	387.058	0.0699328	412.306	0.307227	383.909	0.608133	394.433	0.607378	372.317	0.697365	395.982	0.516624	385.829	0.648281	391.787	0.583919	416.722	0.566518	396.679	0.383808	377.991	0.403674	396.456	0.133169	373.568	0.5507	385.005	0.581788	375.622	0.630999	378.02	0.0999352	373.568	0.5507	385.005	0.581788	375.799	0.758231
365.048	0.683924	393.119	0.231848	405.193	0.164074	378.307	0.104012	369.804	0.101517	406.838	0.356506	387.343	0.0729178	412.562	0.310803	384.205	0.619654	394.731	0.615511	372.6	0.705157	396.277	0.523737	386.129	0.654995	392.089	0.584959	417.005	0.564688	396.967	0.392176	378.279	0.411579	396.721	0.136511	373.878	0.560115	385.308	0.5818	375.911	0.640402	378.307	0.104012	373.878	0.560115	385.308	0.5818	376.102	0.76699
365.347	0.69227	393.402	0.240508	405.476	0.169988	378.595	0.108247	370.092	0.104465	407.117	0.36708	387.628	0.0760308	412.819	0.314443	384.501	0.631183	395.029	0.623522	372.884	0.712879	396.572	0.530778	386.43	0.661514	392.392	0.585708	417.288	0.562788	397.255	0.400617	378.568	0.419609	396.986	0.139996	374.189	0.569407	385.611	0.581521	376.201	0.649779	378.595	0.108247	374.189	0.569407	385.611	0.581521	376.406	0.775595
365.647	0.700532	393.686	0.249398	405.76	0.17608	378.882	0.112644	370.38	0.107562	407.396	0.377806	387.914	0.0792746	413.076	0.318147	384.797	0.642711	395.326	0.631404	373.168	0.720524	396.867	0.537745	386.73	0.667832	392.694	0.586165	417.571	0.560824	397.543	0.40913	378.856	0.427761	397.251	0.143624	374.499	0.578565	385.914	0.580951	376.49	0.659122	378.882	0.112644	374.499	0.578565	385.914	0.580951	376.709	0.784036
365.947	0.708702	393.969	0.258519	406.044	0.182349	379.169	0.117207	370.668	0.11081	407.675	0.388679	388.199	0.0826524	413.333	0.321916	385.093	0.654229	395.624	0.639151	373.451	0.728088	397.163	0.544632	387.031	0.673943	392.996	0.586333	417.854	0.558798	397.831	0.41771	379.145	0.43603	397.515	0.147398	374.81	0.587576	386.218	0.580093	376.78	0.668422	379.169	0.117207	374.81	0.587576	386.218	0.580093	377.013	0.792304
366.247	0.716772	394.253	0.267871	406.327	0.188797	379.456	0.121938	370.956	0.114214	407.953	0.399693	388.484	0.0861672	413.59	0.32575	385.39	0.665729	395.922	0.646756	373.735	0.735565	397.458	0.551438	387.331	0.679843	393.299	0.586213	418.137	0.556715	398.119	0.426354	379.433	0.444415	397.78	0.15132	375.12	0.59643	386.521	0.57895	377.069	0.677672	379.456	0.121938	375.12	0.59643	386.521	0.57895	377.316	0.800392
366.547	0.724734	394.536	0.277453	406.611	0.195424	379.744	0.126842	371.244	0.117776	408.232	0.410842	388.77	0.0898221	413.846	0.329649	385.686	0.6772	396.22	0.654212	374.019	0.742951	397.753	0.558158	387.632	0.685529	393.601	0.585807	418.42	0.554579	398.407	0.435058	379.722	0.452911	398.045	0.155392	375.431	0.605115	386.824	0.577525	377.359	0.686864	379.744	0.126842	375.431	0.605115	386.824	0.577525	377.62	0.808289
366.847	0.732581	394.819	0.287264	406.895	0.202229	380.031	0.13192	371.532	0.1215	408.511	0.422121	389.055	0.0936198	414.103	0.333613	385.982	0.688633	396.517	0.661513	374.303	0.750239	398.048	0.56479	387.932	0.690995	393.904	0.585119	418.703	0.552393	398.695	0.443819	380.01	0.461514	398.31	0.159615	375.741	0.613622	387.127	0.575823	377.648	0.695989	380.031	0.13192	375.741	0.613622	387.127	0.575823	377.923	0.815988
367.147	0.740306	395.103	0.297304	407.178	0.209213	380.318	0.137176	371.82	0.125387	408.79	0.433523	389.34	0.0975634	414.36	0.337642	386.278	0.700019	396.815	0.668652	374.586	0.757426	398.343	0.57133	388.233	0.696238	394.206	0.584152	418.986	0.550161	398.983	0.452633	380.299	0.47022	398.574	0.16399	376.052	0.621938	387.43	0.573847	377.937	0.705041	380.318	0.137176	376.052	0.621938	387.43	0.573847	378.227	0.823481
367.446	0.747902	395.386	0.307571	407.462	0.216374	380.606	0.142613	372.108	0.129442	409.068	0.44504	389.625	0.101656	414.617	0.341735	386.575	0.711349	397.113	0.675625	374.87	0.764507	398.639	0.577775	388.533	0.701255	394.509	0.58291	419.269	0.547887	399.271	0.461496	380.587	0.479025	398.839	0.16852	376.362	0.630055	387.733	0.571602	378.227	0.71401	380.606	0.142613	376.362	0.630055	387.733	0.571602	378.53	0.83076
367.746	0.755361	395.67	0.318064	407.746	0.223712	380.893	0.148234	372.395	0.133666	409.347	0.456667	389.911	0.1059	414.874	0.345892	386.871	0.722613	397.411	0.682424	375.154	0.771478	398.934	0.584123	388.834	0.706043	394.811	0.581398	419.553	0.545573	399.559	0.470404	380.876	0.487925	399.104	0.173205	376.673	0.637962	388.036	0.569095	378.516	0.722891	380.893	0.148234	376.673	0.637962	388.036	0.569095	378.834	0.837817
368.046	0.762677	395.953	0.32878	408.03	0.231225	381.18	0.154041	372.683	0.138064	409.626	0.468395	390.196	0.110298	415.13	0.350113	387.167	0.733802	397.709	0.689043	375.437	0.778335	399.229	0.590371	389.135	0.710601	395.114	0.57962	419.836	0.543223	399.847	0.479353	381.164	0.496914	399.369	0.178046	376.983	0.64565	388.339	0.56633	378.806	0.731676	381.18	0.154041	376.983	0.64565	388.339	0.56633	379.137	0.844645
368.346	0.769843	396.237	0.339717	408.313	0.238913	381.468	0.160037	372.971	0.142638	409.905	0.480217	390.481	0.114852	415.387	0.354395	387.463	0.744907	398.006	0.695478	375.721	0.785074	399.524	0.596517	389.435	0.714925	395.416	0.577583	420.119	0.540841	400.135	0.48834	381.453	0.505989	399.633	0.183044	377.294	0.65311	388.642	0.563315	379.095	0.740356	381.468	0.160037	377.294	0.65311	388.642	0.563315	379.441	0.851236
368.646	0.776853	396.52	0.350872	408.597	0.246773	381.755	0.166223	373.259	0.14739	410.183	0.492124	390.767	0.119567	415.644	0.358739	387.76	0.755919	398.304	0.701722	376.005	0.791691	399.819	0.602559	389.736	0.719015	395.719	0.575293	420.402	0.538429	400.423	0.497358	381.741	0.515144	399.898	0.188199	377.604	0.660334	388.946	0.560056	379.385	0.748926	381.755	0.166223	377.604	0.660334	388.946	0.560056	379.744	0.857585
368.946	0.783701	396.804	0.362241	408.881	0.254804	382.042	0.172603	373.547	0.152324	410.462	0.504109	391.052	0.124443	415.901	0.363142	388.056	0.766827	398.602	0.707771	376.289	0.798184	400.114	0.608494	390.036	0.722869	396.021	0.572755	420.685	0.53599	400.711	0.506405	382.03	0.524373	400.163	0.193513	377.915	0.667313	389.249	0.556561	379.674	0.757378	382.042	0.172603	377.915	0.667313	389.249	0.556561	380.048	0.863684
369.246	0.790382	397.087	0.373822	409.164	0.263003	382.329	0.179178	373.835	0.157442	410.741	0.516162	391.337	0.129483	416.158	0.367604	388.352	0.777624	398.9	0.713618	376.572	0.804547	400.41	0.614321	390.337	0.726487	396.324	0.569979	420.968	0.533527	400.999	0.515476	382.319	0.533672	400.428	0.198985	378.225	0.67404	389.552	0.552837	379.963	0.765704	382.329	0.179178	378.225	0.67404	389.552	0.552837	380.351	0.869528
369.545	0.796888	397.371	0.385609	409.448	0.271367	382.617	0.18595	374.123	0.162747	411.02	0.528274	391.623	0.13469	416.414	0.372122	388.648	0.788301	399.197	0.719259	376.856	0.81078	400.705	0.620037	390.637	0.729869	396.626	0.56697	421.251	0.531042	401.286	0.524567	382.607	0.543035	400.692	0.204616	378.536	0.680508	389.855	0.548893	380.253	0.7739	382.617	0.18595	378.536	0.680508	389.855	0.548893	380.655	0.87511
369.845	0.803216	397.654	0.397599	409.732	0.279893	382.904	0.192921	374.411	0.168241	411.298	0.540436	391.908	0.140066	416.671	0.376696	388.944	0.798847	399.495	0.724688	377.14	0.816878	401	0.625642	390.938	0.733015	396.928	0.563738	421.534	0.528537	401.574	0.533671	382.896	0.552456	400.957	0.210405	378.846	0.68671	390.158	0.544737	380.542	0.781957	382.904	0.192921	378.846	0.68671	390.158	0.544737	380.958	0.880425
370.145	0.809359	397.938	0.409786	410.015	0.288579	383.191	0.200091	374.699	0.173926	411.577	0.552639	392.193	0.145612	416.928	0.381322	389.241	0.809255	399.793	0.729901	377.424	0.82284	401.295	0.631133	391.238	0.735925	397.231	0.56029	421.817	0.526016	401.862	0.542786	383.184	0.56193	401.222	0.216352	379.157	0.69264	390.461	0.540379	380.832	0.78987	383.191	0.200091	379.157	0.69264	390.461	0.540379	381.262	0.885467
370.445	0.815314	398.221	0.422166	410.299	0.297421	383.479	0.207463	374.987	0.179805	411.856	0.564872	392.478	0.15133	417.185	0.385999	389.537	0.819515	400.091	0.734894	377.707	0.828663	401.59	0.636509	391.539	0.7386	397.533	0.556636	422.1	0.523478	402.15	0.551906	383.473	0.57145	401.487	0.222457	379.467	0.698293	390.764	0.535827	381.121	0.797632	383.479	0.207463	379.467	0.698293	390.764	0.535827	381.565	0.890233
370.745	0.821075	398.505	0.434731	410.583	0.306415	383.766	0.215036	375.275	0.185879	412.135	0.577126	392.764	0.157223	417.442	0.390724	389.833	0.829619	400.388	0.739662	377.991	0.834344	401.885	0.641769	391.839	0.741043	397.836	0.552784	422.383	0.520927	402.438	0.561026	383.761	0.581011	401.751	0.228718	379.778	0.703663	391.067	0.531091	381.411	0.805238	383.766	0.215036	379.778	0.703663	391.067	0.531091	381.869	0.894716
371.045	0.826639	398.788	0.447476	410.867	0.315556	384.053	0.222813	375.563	0.192152	412.413	0.589389	393.049	0.163292	417.698	0.395495	390.129	0.839559	400.686	0.7442	378.275	0.839881	402.181	0.646912	392.14	0.743254	398.138	0.548744	422.666	0.518364	402.726	0.570142	384.05	0.590605	402.016	0.235136	380.088	0.708747	391.37	0.526181	381.7	0.812682	384.053	0.222813	380.088	0.708747	391.37	0.526181	382.172	0.898913
371.345	0.832001	399.072	0.460393	411.15	0.324839	384.341	0.230792	375.851	0.198623	412.692	0.601651	393.334	0.169537	417.955	0.400309	390.426	0.849326	400.984	0.748504	378.558	0.845274	402.476	0.651936	392.44	0.745237	398.441	0.544527	422.949	0.515789	403.014	0.579248	384.338	0.600228	402.281	0.241708	380.399	0.713541	391.674	0.521108	381.989	0.819958	384.341	0.230792	380.399	0.713541	391.674	0.521108	382.476	0.902819
371.644	0.837159	399.355	0.473477	411.434	0.334262	384.628	0.238975	376.139	0.205296	412.971	0.613902	393.62	0.175962	418.212	0.405163	390.722	0.858912	401.282	0.752572	378.842	0.850519	402.771	0.656841	392.741	0.746993	398.743	0.540142	423.232	0.513206	403.302	0.588339	384.627	0.609872	402.546	0.248434	380.71	0.718041	391.977	0.51588	382.279	0.82706	384.628	0.238975	380.71	0.718041	391.977	0.51588	382.779	0.906431
371.944	0.842108	399.639	0.486719	411.718	0.343816	384.915	0.24736	376.426	0.212172	413.249	0.62613	393.905	0.182565	418.469	0.410055	391.018	0.868308	401.579	0.756398	379.126	0.855616	403.066	0.661626	393.041	0.748527	399.046	0.535599	423.516	0.510613	403.59	0.597409	384.915	0.619531	402.81	0.255311	381.02	0.722244	392.28	0.51051	382.568	0.833984	384.915	0.24736	381.02	0.722244	392.28	0.51051	383.083	0.909746
372.244	0.846845	399.922	0.500111	412.001	0.353499	385.203	0.255949	376.714	0.219252	413.528	0.638324	394.19	0.189349	418.726	0.414979	391.314	0.877507	401.877	0.75998	379.41	0.860563	403.361	0.666289	393.342	0.749841	399.348	0.53091	423.799	0.508013	403.878	0.606455	385.204	0.629199	403.075	0.262339	381.331	0.72615	392.583	0.505008	382.858	0.840725	385.203	0.255949	381.331	0.72615	392.583	0.505008	383.386	0.912761
372.544	0.851369	400.206	0.513645	412.285	0.363302	385.49	0.26474	377.002	0.226536	413.807	0.650472	394.476	0.196314	418.982	0.419935	391.611	0.886501	402.175	0.763314	379.693	0.86536	403.657	0.67083	393.643	0.750939	399.651	0.526085	424.082	0.505405	404.166	0.61547	385.492	0.638868	403.34	0.269514	381.641	0.729756	392.886	0.499385	383.147	0.847278	385.49	0.26474	381.641	0.729756	392.886	0.499385	383.69	0.915473
372.844	0.855676	400.489	0.527312	412.569	0.373221	385.777	0.273732	377.29	0.234026	414.086	0.662563	394.761	0.203461	419.239	0.424917	391.907	0.895282	402.473	0.766397	379.977	0.870004	403.952	0.675248	393.943	0.751825	399.953	0.521136	424.365	0.502791	404.454	0.624448	385.781	0.648531	403.605	0.276835	381.952	0.733062	393.189	0.493651	383.437	0.853638	385.777	0.273732	381.952	0.733062	393.189	0.493651	383.993	0.917878
373.144	0.859764	400.772	0.541101	412.852	0.383248	386.064	0.282925	377.578	0.241723	414.364	0.674585	395.046	0.210789	419.496	0.429921	392.203	0.903843	402.77	0.769227	380.261	0.874495	404.247	0.679543	394.244	0.752504	400.256	0.516073	424.648	0.500169	404.742	0.633386	386.069	0.658183	403.869	0.284299	382.262	0.736067	393.492	0.487818	383.726	0.8598	386.064	0.282925	382.262	0.736067	393.492	0.487818	384.297	0.919977
373.444	0.863632	401.056	0.555005	413.136	0.393377	386.352	0.292316	377.866	0.249627	414.643	0.686527	395.332	0.218299	419.753	0.434945	392.499	0.912177	403.068	0.7718	380.544	0.878832	404.542	0.683714	394.544	0.752981	400.558	0.510909	424.931	0.497542	405.03	0.642276	386.358	0.667816	404.134	0.291904	382.573	0.738773	393.795	0.481898	384.015	0.865762	386.352	0.292316	382.573	0.738773	393.795	0.481898	384.6	0.921765
373.743	0.867277	401.339	0.569012	413.42	0.403601	386.639	0.301903	378.154	0.257739	414.922	0.698375	395.617	0.22599	420.01	0.439983	392.795	0.920276	403.366	0.774114	380.828	0.883014	404.837	0.68776	394.845	0.75326	400.86	0.505653	425.214	0.494907	405.318	0.651113	386.646	0.677424	404.399	0.299645	382.883	0.741179	394.098	0.4759	384.305	0.871518	386.639	0.301903	382.883	0.741179	394.098	0.4759	384.904	0.923243
374.043	0.8707	401.623	0.583111	413.703	0.413912	386.926	0.311685	378.442	0.266057	415.201	0.710118	395.902	0.233863	420.266	0.445033	393.092	0.928133	403.664	0.776166	381.112	0.887042	405.132	0.69168	395.145	0.753347	401.163	0.500319	425.497	0.492266	405.606	0.659892	386.935	0.686998	404.664	0.307521	383.194	0.743289	394.402	0.469837	384.594	0.877066	386.926	0.311685	383.194	0.743289	394.402	0.469837	385.207	0.924409
374.343	0.873898	401.906	0.597293	413.987	0.424301	387.214	0.321659	378.73	0.274582	415.479	0.721744	396.187	0.241915	420.523	0.450088	393.388	0.935743	403.961	0.777956	381.396	0.890913	405.428	0.695474	395.446	0.753247	401.465	0.494916	425.78	0.489616	405.894	0.668607	387.223	0.696534	404.928	0.315528	383.504	0.745103	394.705	0.463719	384.884	0.882401	387.214	0.321659	383.504	0.745103	394.705	0.463719	385.511	0.925261
374.643	0.876871	402.19	0.611544	414.271	0.434762	387.501	0.331822	379.018	0.283314	415.758	0.733241	396.473	0.250147	420.78	0.455145	393.684	0.943097	404.259	0.77948	381.679	0.894629	405.723	0.699142	395.746	0.752967	401.768	0.489458	426.063	0.486959	406.182	0.677253	387.512	0.706022	405.193	0.323661	383.815	0.746625	395.008	0.457558	385.173	0.88752	387.501	0.331822	383.815	0.746625	395.008	0.457558	385.814	0.9258
374.943	0.879619	402.473	0.625854	414.555	0.445286	387.788	0.342172	379.306	0.292251	416.037	0.744596	396.758	0.258558	421.037	0.460199	393.98	0.95019	404.557	0.780737	381.963	0.898188	406.018	0.702683	396.047	0.752512	402.07	0.483955	426.346	0.484293	406.47	0.685823	387.8	0.715458	405.458	0.331918	384.125	0.747857	395.311	0.451365	385.463	0.89242	387.788	0.342172	384.125	0.747857	395.311	0.451365	386.118	0.926026
375.243	0.88214	402.757	0.640211	414.838	0.455864	388.076	0.352703	379.594	0.301393	416.316	0.755797	397.043	0.267145	421.294	0.465245	394.277	0.957017	404.855	0.781727	382.247	0.90159	406.313	0.706095	396.347	0.751888	402.373	0.478419	426.629	0.481617	406.758	0.694311	388.089	0.724833	405.723	0.340293	384.436	0.748805	395.614	0.44515	385.752	0.897099	388.076	0.352703	384.436	0.748805	395.614	0.44515	386.421	0.925937
375.543	0.884436	403.04	0.654602	415.122	0.466486	388.363	0.363413	379.882	0.310737	416.594	0.766831	397.329	0.275907	421.55	0.470279	394.573	0.963569	405.152	0.782447	382.53	0.904836	406.608	0.709379	396.648	0.751103	402.675	0.472861	426.912	0.47893	407.046	0.702713	388.378	0.734141	405.987	0.348782	384.746	0.749472	395.917	0.438925	386.041	0.901552	388.363	0.363413	384.746	0.749472	395.917	0.438925	386.725	0.925535
375.842	0.886507	403.324	0.669014	415.406	0.477145	388.65	0.374298	380.169	0.320283	416.873	0.777687	397.614	0.284841	421.807	0.475295	394.869	0.969843	405.45	0.782896	382.814	0.907924	406.903	0.712533	396.948	0.750162	402.978	0.467293	427.196	0.476231	407.334	0.711021	388.666	0.743375	406.252	0.357381	385.057	0.749862	396.22	0.432699	386.331	0.905778	388.65	0.374298	385.057	0.749862	396.22	0.432699	387.028	0.92482
376.142	0.888352	403.607	0.683434	415.689	0.48783	388.937	0.385352	380.457	0.330029	417.152	0.788353	397.899	0.293947	422.064	0.480289	395.165	0.975833	405.748	0.783075	383.098	0.910854	407.199	0.715557	397.249	0.749072	403.28	0.461724	427.479	0.473519	407.622	0.71923	388.955	0.752529	406.517	0.366086	385.367	0.749983	396.523	0.426484	386.62	0.909775	388.937	0.385352	385.367	0.749983	396.523	0.426484	387.332	0.923793
376.442	0.889973	403.891	0.697848	415.973	0.498531	389.225	0.396572	380.745	0.339971	417.431	0.798816	398.185	0.303221	422.321	0.485254	395.462	0.981533	406.046	0.782982	383.382	0.913627	407.494	0.71845	397.549	0.747839	403.583	0.456168	427.762	0.470791	407.91	0.727335	389.243	0.761595	406.782	0.37489	385.678	0.749838	396.827	0.420289	386.91	0.91354	389.225	0.396572	385.678	0.749838	396.827	0.420289	387.635	0.922455
376.742	0.89137	404.174	0.712243	416.257	0.509239	389.512	0.407951	381.033	0.350108	417.709	0.809064	398.47	0.312659	422.578	0.490187	395.758	0.986938	406.343	0.782617	383.665	0.916243	407.789	0.721211	397.85	0.746472	403.885	0.450633	428.045	0.468048	408.198	0.735328	389.532	0.770567	407.046	0.383788	385.988	0.749434	397.13	0.414125	387.199	0.91707	389.512	0.407951	385.988	0.749434	397.13	0.414125	387.939	0.920807
377.042	0.892545	404.458	0.726606	416.54	0.519943	389.799	0.419484	381.321	0.360436	417.988	0.819086	398.755	0.32226	422.834	0.495081	396.054	0.992044	406.641	0.78198	383.949	0.9187	408.084	0.723839	398.151	0.744976	404.188	0.44513	428.328	0.465287	408.486	0.743205	389.82	0.779438	407.311	0.392776	386.299	0.748779	397.433	0.408001	387.489	0.920365	389.799	0.419484	386.299	0.748779	397.433	0.408001	388.242	0.918851
377.342	0.893499	404.741	0.740921	416.824	0.530633	390.087	0.431165	381.609	0.370952	418.267	0.82887	399.041	0.332019	423.091	0.499931	396.35	0.996845	406.939	0.781072	384.233	0.920999	408.379	0.726333	398.451	0.743358	404.49	0.439671	428.611	0.462506	408.774	0.750959	390.109	0.788203	407.576	0.401847	386.609	0.747878	397.736	0.401926	387.778	0.923422	390.087	0.431165	386.609	0.747878	397.736	0.401926	388.546	0.91659
377.642	0.894232	405.025	0.755174	417.108	0.541299	390.374	0.442988	381.897	0.381653	418.546	0.838404	399.326	0.341934	423.348	0.504733	396.646	1.00134	407.237	0.779892	384.517	0.92314	408.674	0.728692	398.752	0.741625	404.792	0.434263	428.894	0.459703	409.062	0.758584	390.397	0.796854	407.84	0.410995	386.92	0.746739	398.039	0.39591	388.067	0.92624	390.374	0.442988	386.92	0.746739	398.039	0.39591	388.849	0.914024
377.941	0.894747	405.308	0.769351	417.392	0.551929	390.661	0.454946	382.185	0.392534	418.824	0.847676	399.611	0.351999	423.605	0.509479	396.943	1.00552	407.534	0.778442	384.8	0.925122	408.97	0.730914	399.052	0.739785	405.095	0.428918	429.177	0.456878	409.35	0.766074	390.686	0.805385	408.105	0.420215	387.23	0.74537	398.342	0.389961	388.357	0.928818	390.661	0.454946	387.23	0.74537	398.342	0.389961	389.153	0.911157
378.241	0.895045	405.592	0.783437	417.675	0.562513	390.949	0.467033	382.473	0.403591	419.103	0.856677	399.896	0.36221	423.862	0.514166	397.239	1.00938	407.832	0.776721	385.084	0.926946	409.265	0.732999	399.353	0.737844	405.397	0.423645	429.46	0.454027	409.638	0.773424	390.974	0.813791	408.37	0.429499	387.541	0.743779	398.645	0.384088	388.646	0.931153	390.949	0.467033	387.541	0.743779	398.645	0.384088	389.456	0.907992
378.541	0.895128	405.875	0.797417	417.959	0.57304	391.236	0.47924	382.761	0.41482	419.382	0.865395	400.182	0.372563	424.118	0.518787	397.535	1.01292	408.13	0.774733	385.368	0.92861	409.56	0.734945	399.653	0.735808	405.7	0.418452	429.743	0.45115	409.926	0.780627	391.263	0.822065	408.635	0.438842	387.852	0.741974	398.948	0.378298	388.936	0.933246	391.236	0.47924	387.852	0.741974	398.948	0.378298	389.76	0.90453
378.841	0.894997	406.159	0.811275	418.243	0.583498	391.523	0.49156	383.049	0.426215	419.661	0.873818	400.467	0.383053	424.375	0.523337	397.831	1.01614	408.428	0.772476	385.651	0.930115	409.855	0.736751	399.954	0.733685	406.002	0.413347	430.026	0.448244	410.214	0.787678	391.551	0.830201	408.899	0.448238	388.162	0.739963	399.251	0.3726	389.225	0.935094	391.523	0.49156	388.162	0.739963	399.251	0.3726	390.063	0.900775
379.141	0.894655	406.442	0.824998	418.526	0.593876	391.81	0.503986	383.337	0.43777	419.939	0.881938	400.752	0.393675	424.632	0.52781	398.128	1.01903	408.725	0.769954	385.935	0.93146	410.15	0.738415	400.254	0.731481	406.305	0.40834	430.309	0.445307	410.502	0.79457	391.84	0.838194	409.164	0.457678	388.473	0.737755	399.555	0.367001	389.515	0.936698	391.81	0.503986	388.473	0.737755	399.555	0.367001	390.367	0.896731
379.441	0.894103	406.725	0.838569	418.81	0.604164	392.098	0.516508	383.625	0.449482	420.218	0.889744	401.038	0.404423	424.889	0.532201	398.424	1.0216	409.023	0.767168	386.219	0.932645	410.446	0.739935	400.555	0.729203	406.607	0.403438	430.592	0.442338	410.79	0.801299	392.128	0.846038	409.429	0.467156	388.783	0.735358	399.858	0.361507	389.804	0.938056	392.098	0.516508	388.783	0.735358	399.858	0.361507	390.67	0.892402
379.741	0.893344	407.009	0.851973	419.094	0.614349	392.385	0.529119	383.913	0.461342	420.497	0.897226	401.323	0.415291	425.146	0.536505	398.72	1.02383	409.321	0.764121	386.503	0.93367	410.741	0.74131	400.855	0.726856	406.91	0.398648	430.875	0.439334	411.078	0.807857	392.417	0.853727	409.694	0.476666	389.094	0.732781	400.161	0.356125	390.093	0.939169	392.385	0.529119	389.094	0.732781	400.161	0.356125	390.974	0.88779
380.04	0.89238	407.292	0.865195	419.377	0.624419	392.672	0.541809	384.2	0.473345	420.776	0.904374	401.608	0.426274	425.402	0.540716	399.016	1.02572	409.619	0.760813	386.786	0.934532	411.036	0.742538	401.156	0.724447	407.212	0.393977	431.159	0.436294	411.366	0.814239	392.705	0.861256	409.958	0.486199	389.404	0.730034	400.464	0.350861	390.383	0.940034	392.672	0.541809	389.404	0.730034	400.464	0.350861	391.277	0.8829
380.34	0.891212	407.576	0.87822	419.661	0.634365	392.96	0.554569	384.488	0.485483	421.054	0.91118	401.894	0.437364	425.659	0.544829	399.312	1.02728	409.916	0.757249	387.07	0.935233	411.331	0.743617	401.456	0.721981	407.515	0.389431	431.442	0.433216	411.654	0.820441	392.994	0.868621	410.223	0.495749	389.715	0.727125	400.767	0.34572	390.672	0.940653	392.96	0.554569	389.715	0.727125	400.767	0.34572	391.581	0.877736
380.64	0.889844	407.859	0.891032	419.945	0.644173	393.247	0.567389	384.776	0.49775	421.333	0.917636	402.179	0.448555	425.916	0.548839	399.609	1.0285	410.214	0.75343	387.354	0.935772	411.626	0.744546	401.757	0.719465	407.817	0.385017	431.725	0.430098	411.942	0.826455	393.282	0.875815	410.488	0.505308	390.025	0.724063	401.07	0.340708	390.962	0.941025	393.247	0.567389	390.025	0.724063	401.07	0.340708	391.884	0.872302
380.94	0.888277	408.143	0.903617	420.228	0.653833	393.534	0.580261	385.064	0.510138	421.612	0.923732	402.464	0.459841	426.173	0.55274	399.905	1.02937	410.512	0.749361	387.637	0.936146	411.921	0.745322	402.057	0.716904	408.12	0.38074	432.008	0.426938	412.23	0.832276	393.571	0.882835	410.753	0.514869	390.336	0.720858	401.373	0.33583	391.251	0.94115	393.534	0.580261	390.336	0.720858	401.373	0.33583	392.188	0.866604
381.24	0.886513	408.426	0.915959	420.512	0.663333	393.822	0.593173	385.352	0.522639	421.891	0.929461	402.749	0.471215	426.43	0.556527	400.201	1.02991	410.81	0.745043	387.921	0.936357	412.217	0.745942	402.358	0.714302	408.422	0.376605	432.291	0.423734	412.518	0.8379	393.86	0.889675	411.017	0.524423	390.646	0.717517	401.676	0.331088	391.541	0.941027	393.822	0.593173	390.646	0.717517	401.676	0.331088	392.491	0.860646
381.54	0.884555	408.71	0.928043	420.796	0.672662	394.109	0.606115	385.64	0.535245	422.169	0.934816	403.035	0.482667	426.686	0.560196	400.497	1.0301	411.107	0.740481	388.205	0.936402	412.512	0.746407	402.659	0.711666	408.724	0.372616	432.574	0.420486	412.806	0.84332	394.148	0.896331	411.282	0.533964	390.957	0.714051	401.979	0.326488	391.83	0.940658	394.109	0.606115	390.957	0.714051	401.979	0.326488	392.795	0.854433
381.84	0.882405	408.993	0.939855	421.08	0.681809	394.396	0.619077	385.928	0.547947	422.448	0.939789	403.32	0.494192	426.943	0.563742	400.794	1.02995	411.405	0.735677	388.489	0.936281	412.807	0.746712	402.959	0.708999	409.027	0.368778	432.857	0.41719	413.094	0.848532	394.437	0.902799	411.547	0.543483	391.267	0.710468	402.283	0.322033	392.119	0.940042	394.396	0.619077	391.267	0.710468	402.283	0.322033	393.098	0.84797
382.14	0.880065	409.277	0.95138	421.363	0.690761	394.683	0.632049	386.216	0.560737	422.727	0.944375	403.605	0.505782	427.2	0.567159	401.09	1.02945	411.703	0.730637	388.772	0.935993	413.102	0.746855	403.26	0.706306	409.329	0.365094	433.14	0.413847	413.382	0.85353	394.725	0.909075	411.812	0.552972	391.578	0.706776	402.586	0.317724	392.409	0.939179	394.683	0.632049	391.578	0.706776	402.586	0.317724	393.402	0.841262
382.439	0.877537	409.56	0.962604	421.647	0.699509	394.971	0.645018	386.504	0.573604	423.005	0.948566	403.891	0.517427	427.457	0.570443	401.386	1.02861	412.001	0.725364	389.056	0.935537	413.397	0.746836	403.56	0.703591	409.632	0.361567	433.423	0.410455	413.67	0.858308	395.014	0.915154	412.076	0.562424	391.888	0.702984	402.889	0.313566	392.698	0.938071	394.971	0.645018	391.888	0.702984	402.889	0.313566	393.705	0.834316
382.739	0.874824	409.844	0.973513	421.931	0.708042	395.258	0.657974	386.792	0.58654	423.284	0.952358	404.176	0.52912	427.714	0.57359	401.682	1.02742	412.298	0.719863	389.34	0.934911	413.692	0.746651	403.861	0.700858	409.934	0.358199	433.706	0.407011	413.958	0.862864	395.302	0.921033	412.341	0.571831	392.199	0.699101	403.192	0.309558	392.988	0.936717	395.258	0.657974	392.199	0.699101	403.192	0.309558	394.009	0.827136
383.039	0.871928	410.127	0.984092	422.214	0.716348	395.545	0.670906	387.08	0.599535	423.563	0.955746	404.461	0.540852	427.971	0.576595	401.979	1.02589	412.596	0.714138	389.623	0.934114	413.988	0.746297	404.161	0.698109	410.237	0.354993	433.989	0.403516	414.246	0.86719	395.591	0.926709	412.606	0.581185	392.509	0.695134	403.495	0.305704	393.277	0.935119	395.545	0.670906	392.509	0.695134	403.495	0.305704	394.312	0.819729
383.339	0.86885	410.411	0.994329	422.498	0.724417	395.833	0.683802	387.368	0.612578	423.842	0.958725	404.747	0.552615	428.227	0.579455	402.275	1.02401	412.894	0.708194	389.907	0.933146	414.283	0.745774	404.462	0.695349	410.539	0.351949	434.272	0.399968	414.534	0.871283	395.879	0.932177	412.871	0.590478	392.82	0.691091	403.798	0.302003	393.567	0.933277	395.833	0.683802	392.82	0.691091	403.798	0.302003	394.616	0.812101
383.639	0.865594	410.694	1.00421	422.782	0.732239	396.12	0.696651	387.656	0.625659	424.12	0.961291	405.032	0.564399	428.484	0.582165	402.571	1.02179	413.192	0.702036	390.191	0.932004	414.578	0.745078	404.762	0.69258	410.842	0.34907	434.555	0.396366	414.822	0.875139	396.168	0.937435	413.135	0.599702	393.13	0.68698	404.101	0.298456	393.856	0.931192	396.12	0.696651	393.13	0.68698	404.101	0.298456	394.919	0.804258
383.939	0.86216	410.978	1.01372	423.065	0.739803	396.407	0.70944	387.944	0.638767	424.399	0.96344	405.317	0.576195	428.741	0.584722	402.867	1.01923	413.489	0.69567	390.475	0.930688	414.873	0.744208	405.063	0.689804	411.144	0.346354	434.838	0.39271	415.11	0.878752	396.456	0.942479	413.4	0.608849	393.441	0.682808	404.404	0.295064	394.145	0.928865	396.407	0.70944	393.441	0.682808	404.404	0.295064	395.223	0.796206
384.239	0.858551	411.261	1.02285	423.349	0.7471	396.695	0.722158	388.231	0.651892	424.678	0.96517	405.603	0.587995	428.998	0.587122	403.163	1.01632	413.787	0.6891	390.758	0.929196	415.168	0.743161	405.363	0.687023	411.447	0.343803	435.122	0.388999	415.398	0.882119	396.745	0.947307	413.665	0.617912	393.751	0.678582	404.707	0.291825	394.435	0.926298	396.695	0.722158	393.751	0.678582	404.707	0.291825	395.526	0.787953
384.538	0.854769	411.545	1.03159	423.633	0.754121	396.982	0.734792	388.519	0.665021	424.957	0.966479	405.888	0.599788	429.255	0.589361	403.46	1.01308	414.085	0.682332	391.042	0.927527	415.464	0.741935	405.664	0.684239	411.749	0.341415	435.405	0.385232	415.686	0.885235	397.033	0.951915	413.93	0.626883	394.062	0.674309	405.011	0.28874	394.724	0.923491	396.982	0.734792	394.062	0.674309	405.011	0.28874	395.83	0.779504
384.838	0.850815	411.828	1.03993	423.917	0.760856	397.269	0.747331	388.807	0.678145	425.235	0.967364	406.173	0.611566	429.511	0.591437	403.756	1.0095	414.383	0.675372	391.326	0.92568	415.759	0.740528	405.964	0.681454	412.052	0.33919	435.688	0.381409	415.974	0.888097	397.322	0.956302	414.194	0.635753	394.372	0.669995	405.314	0.285806	395.014	0.920446	397.269	0.747331	394.372	0.669995	405.314	0.285806	396.133	0.770866
385.138	0.846693	412.112	1.04785	424.2	0.767296	397.556	0.759763	389.095	0.691249	425.514	0.967824	406.458	0.623318	429.768	0.593347	404.052	1.00558	414.68	0.668227	391.61	0.923652	416.054	0.738939	406.265	0.678668	412.354	0.337125	435.971	0.377531	416.262	0.890701	397.61	0.960464	414.459	0.644517	394.683	0.665647	405.617	0.283023	395.303	0.917165	397.556	0.759763	394.683	0.665647	405.617	0.283023	396.437	0.762046
385.438	0.842403	412.395	1.05534	424.484	0.773432	397.844	0.772075	389.383	0.704324	425.793	0.967858	406.744	0.635035	430.025	0.595087	404.348	1.00133	414.978	0.660902	391.893	0.921444	416.349	0.737164	406.566	0.675882	412.656	0.33522	436.254	0.373596	416.55	0.893044	397.899	0.964399	414.724	0.653165	394.994	0.661269	405.92	0.280388	395.593	0.913648	397.844	0.772075	394.994	0.661269	405.92	0.280388	396.74	0.753052
385.738	0.837947	412.678	1.06239	424.768	0.779257	398.131	0.784255	389.671	0.717356	426.072	0.967467	407.029	0.646707	430.282	0.596656	404.645	0.996751	415.276	0.653403	392.177	0.919052	416.644	0.735203	406.866	0.673096	412.959	0.333471	436.537	0.369605	416.838	0.895121	398.187	0.968107	414.989	0.661691	395.304	0.656867	406.223	0.277898	395.882	0.909898	398.131	0.784255	395.304	0.656867	406.223	0.277898	397.044	0.743891
386.038	0.833328	412.962	1.06901	425.051	0.784762	398.418	0.796292	389.959	0.730334	426.35	0.966651	407.314	0.658325	430.539	0.598052	404.941	0.991846	415.574	0.645738	392.461	0.916477	416.939	0.733054	407.167	0.67031	413.261	0.331875	436.82	0.365558	417.126	0.896931	398.476	0.971583	415.253	0.670087	395.615	0.652445	406.526	0.275551	396.172	0.905917	398.418	0.796292	395.615	0.652445	406.526	0.275551	397.347	0.734569
386.338	0.828547	413.245	1.07516	425.335	0.78994	398.706	0.808172	390.247	0.743245	426.629	0.96541	407.6	0.669877	430.795	0.599272	405.237	0.986617	415.872	0.637912	392.744	0.913717	417.235	0.730715	407.467	0.667525	413.564	0.33043	437.103	0.361456	417.414	0.898469	398.764	0.974827	415.518	0.678347	395.925	0.648009	406.829	0.273343	396.461	0.901706	398.706	0.808172	395.925	0.648009	406.829	0.273343	397.651	0.725095
386.637	0.823605	413.529	1.08086	425.619	0.794785	398.993	0.819884	390.535	0.756076	426.908	0.963747	407.885	0.681355	431.052	0.600314	405.533	0.981069	416.169	0.629933	393.028	0.910771	417.53	0.728185	407.768	0.664738	413.866	0.329132	437.386	0.3573	417.702	0.899735	399.053	0.977837	415.783	0.686463	396.236	0.643563	407.132	0.271272	396.75	0.897267	398.993	0.819884	396.236	0.643563	407.132	0.271272	397.954	0.715476
386.937	0.818505	413.812	1.08608	425.902	0.799288	399.28	0.831416	390.823	0.768815	427.187	0.961663	408.17	0.692748	431.309	0.601179	405.83	0.975205	416.467	0.621807	393.312	0.907637	417.825	0.725462	408.068	0.66195	414.169	0.327975	437.669	0.35309	417.99	0.900724	399.341	0.980611	416.048	0.694429	396.546	0.639109	407.435	0.269333	397.04	0.892604	399.28	0.831416	396.546	0.639109	407.435	0.269333	398.258	0.705719
387.237	0.813249	414.096	1.09082	426.186	0.803445	399.568	0.842756	391.111	0.781448	427.465	0.959161	408.456	0.704047	431.566	0.601863	406.126	0.969031	416.765	0.613542	393.596	0.904315	418.12	0.722546	408.369	0.659159	414.471	0.326957	437.952	0.348826	418.278	0.901435	399.63	0.983148	416.312	0.702238	396.857	0.634651	407.739	0.267523	397.329	0.887718	399.568	0.842756	396.857	0.634651	407.739	0.267523	398.561	0.695833
387.537	0.807837	414.379	1.09508	426.47	0.807249	399.855	0.853892	391.399	0.793964	427.744	0.956244	408.741	0.71524	431.823	0.602367	406.422	0.96255	417.063	0.605144	393.879	0.900804	418.415	0.719435	408.669	0.656363	414.774	0.326071	438.235	0.344511	418.566	0.901866	399.919	0.985447	416.577	0.709884	397.167	0.630192	408.042	0.265836	397.619	0.882611	399.855	0.853892	397.167	0.630192	408.042	0.265836	398.865	0.685824
387.837	0.802272	414.663	1.09886	426.753	0.810695	400.142	0.864812	391.687	0.806349	428.023	0.952915	409.026	0.726319	432.079	0.602689	406.718	0.955768	417.36	0.596622	394.163	0.897102	418.71	0.716129	408.97	0.65356	415.076	0.325313	438.518	0.340144	418.854	0.902015	400.207	0.987506	416.842	0.71736	397.478	0.625734	408.345	0.264268	397.908	0.877287	400.142	0.864812	397.478	0.625734	408.345	0.264268	399.168	0.675701
388.137	0.796555	414.946	1.10213	427.037	0.813778	400.429	0.875505	391.974	0.818589	428.302	0.94918	409.312	0.737274	432.336	0.60283	407.014	0.948689	417.658	0.587982	394.447	0.89321	419.006	0.712627	409.27	0.650749	415.379	0.324678	438.802	0.335729	419.142	0.90188	400.496	0.989325	417.107	0.724661	397.788	0.62128	408.648	0.262815	398.198	0.871747	400.429	0.875505	397.788	0.62128	408.648	0.262815	399.472	0.665472
388.437	0.790689	415.23	1.10491	427.321	0.816495	400.717	0.88596	392.262	0.830673	428.58	0.945043	409.597	0.748094	432.593	0.602789	407.311	0.941321	417.956	0.579232	394.73	0.889126	419.301	0.70893	409.571	0.647927	415.681	0.324158	439.085	0.331265	419.43	0.901461	400.784	0.990903	417.371	0.731781	398.099	0.61683	408.951	0.26147	398.487	0.865996	400.717	0.88596	398.099	0.61683	408.951	0.26147	399.775	0.655145
388.736	0.784675	415.513	1.10718	427.605	0.818841	401.004	0.896165	392.55	0.842587	428.859	0.940509	409.882	0.75877	432.85	0.602567	407.607	0.933667	418.254	0.570379	395.014	0.88485	419.596	0.705036	409.871	0.645091	415.984	0.323749	439.368	0.326755	419.717	0.900757	401.073	0.992239	417.636	0.738715	398.409	0.612387	409.254	0.26023	398.776	0.860036	401.004	0.896165	398.409	0.612387	409.254	0.26023	400.079	0.644727
389.036	0.778515	415.797	1.10894	427.888	0.820813	401.291	0.906109	392.838	0.854318	429.138	0.935584	410.167	0.769291	433.107	0.602164	407.903	0.925735	418.551	0.561431	395.298	0.880381	419.891	0.700947	410.172	0.642239	416.286	0.323444	439.651	0.322201	420.005	0.899766	401.361	0.993332	417.901	0.745456	398.72	0.607951	409.557	0.259087	399.066	0.85387	401.291	0.906109	398.72	0.607951	409.557	0.259087	400.382	0.634227
389.336	0.77221	416.08	1.1102	428.172	0.822407	401.579	0.915782	393.126	0.865854	429.417	0.930273	410.453	0.77965	433.363	0.601582	408.199	0.91753	418.849	0.552396	395.582	0.87572	420.186	0.696662	410.472	0.639367	416.588	0.323235	439.934	0.317604	420.293	0.898488	401.65	0.994182	418.166	0.752001	399.03	0.603522	409.86	0.258037	399.355	0.847501	401.579	0.915782	399.03	0.603522	409.86	0.258037	400.686	0.623653
389.636	0.765764	416.364	1.11095	428.456	0.823623	401.866	0.925172	393.414	0.877181	429.695	0.924585	410.738	0.789836	433.62	0.60082	408.496	0.90906	419.147	0.543282	395.865	0.870867	420.482	0.692182	410.773	0.636472	416.891	0.323117	440.217	0.312967	420.581	0.896923	401.938	0.994789	418.43	0.758344	399.341	0.5991	410.163	0.257073	399.645	0.840934	401.866	0.925172	399.341	0.5991	410.163	0.257073	400.989	0.613013
389.936	0.759177	416.647	1.11118	428.739	0.824458	402.153	0.934271	393.702	0.888286	429.974	0.918526	411.023	0.799839	433.877	0.599881	408.792	0.900331	419.445	0.534095	396.149	0.865821	420.777	0.687509	411.074	0.633551	417.193	0.323082	440.5	0.308291	420.869	0.895072	402.227	0.995152	418.695	0.764481	399.651	0.594686	410.467	0.25619	399.934	0.834172	402.153	0.934271	399.651	0.594686	410.467	0.25619	401.293	0.602315
390.236	0.752452	416.931	1.1109	429.023	0.824911	402.441	0.943067	393.99	0.899158	430.253	0.912104	411.309	0.809651	434.134	0.598766	409.088	0.89135	419.742	0.524845	396.433	0.860583	421.072	0.682642	411.374	0.630601	417.496	0.323123	440.783	0.303579	421.157	0.892934	402.515	0.99527	418.96	0.770409	399.962	0.590278	410.77	0.255381	400.224	0.827218	402.441	0.943067	399.962	0.590278	410.77	0.255381	401.596	0.591567
390.536	0.745591	417.214	1.11011	429.307	0.824981	402.728	0.951552	394.278	0.909783	430.532	0.905326	411.594	0.819263	434.391	0.597478	409.384	0.882126	420.04	0.515538	396.716	0.855153	421.367	0.677584	411.675	0.627618	417.798	0.323232	441.066	0.298833	421.445	0.89051	402.804	0.995145	419.225	0.776122	400.272	0.585877	411.073	0.25464	400.513	0.820076	402.728	0.951552	400.272	0.585877	411.073	0.25464	401.9	0.580778
390.835	0.738597	417.498	1.10881	429.59	0.824668	403.015	0.959715	394.566	0.920149	430.81	0.898202	411.879	0.828666	434.647	0.596017	409.681	0.872664	420.338	0.506183	397	0.849533	421.662	0.672337	411.975	0.624597	418.101	0.323403	441.349	0.294056	421.733	0.887801	403.092	0.994775	419.489	0.781618	400.583	0.58148	411.376	0.253962	400.802	0.812752	403.015	0.959715	400.583	0.58148	411.376	0.253962	402.203	0.569955
391.135	0.731471	417.781	1.107	429.874	0.823973	403.302	0.967548	394.854	0.930245	431.089	0.890739	412.165	0.837852	434.904	0.594388	409.977	0.862974	420.636	0.496787	397.284	0.843723	421.957	0.666902	412.276	0.621536	418.403	0.323627	441.632	0.28925	422.021	0.884809	403.381	0.994162	419.754	0.786893	400.893	0.577086	411.679	0.253339	401.092	0.805248	403.302	0.967548	400.893	0.577086	411.679	0.253339	402.507	0.559106
391.435	0.724215	418.065	1.10468	430.158	0.822896	403.59	0.975043	395.142	0.940058	431.368	0.882949	412.45	0.846811	435.161	0.592593	410.273	0.853064	420.933	0.487358	397.568	0.837725	422.253	0.661281	412.576	0.61843	418.706	0.323897	441.915	0.284419	422.309	0.881534	403.669	0.993304	420.019	0.791944	401.204	0.572693	411.982	0.252765	401.381	0.79757	403.59	0.975043	401.204	0.572693	411.982	0.252765	402.81	0.54824
391.735	0.716834	418.348	1.10186	430.442	0.821439	403.877	0.982191	395.43	0.949576	431.647	0.874839	412.735	0.855536	435.418	0.590634	410.569	0.842941	421.231	0.477903	397.851	0.831539	422.548	0.655478	412.877	0.615275	419.008	0.324205	442.198	0.279564	422.597	0.877979	403.958	0.992204	420.284	0.796769	401.514	0.568301	412.285	0.252234	401.671	0.789722	403.877	0.982191	401.514	0.568301	412.285	0.252234	403.114	0.537364
392.035	0.709329	418.631	1.09855	430.725	0.819605	404.164	0.988983	395.718	0.958789	431.925	0.86642	413.02	0.86402	435.675	0.588515	410.865	0.832614	421.529	0.468431	398.135	0.825167	422.843	0.649494	413.177	0.612068	419.311	0.324543	442.481	0.274688	422.885	0.874146	404.246	0.99086	420.548	0.801365	401.825	0.563905	412.588	0.251739	401.96	0.781708	404.164	0.988983	401.825	0.563905	412.588	0.251739	403.417	0.526486
392.335	0.701702	418.915	1.09473	431.009	0.817394	404.452	0.995413	396.005	0.967685	432.204	0.857703	413.306	0.872254	435.931	0.58624	411.162	0.822093	421.827	0.458948	398.419	0.818612	423.138	0.643334	413.478	0.608805	419.613	0.324904	442.765	0.269796	423.173	0.870037	404.535	0.989274	420.813	0.805731	402.135	0.559505	412.891	0.251274	402.25	0.773535	404.452	0.995413	402.135	0.559505	412.891	0.251274	403.721	0.515614
392.635	0.693958	419.198	1.09043	431.293	0.814811	404.739	1.00147	396.293	0.976253	432.483	0.848697	413.591	0.880231	436.188	0.583813	411.458	0.811386	422.124	0.449463	398.703	0.811876	423.433	0.637	413.778	0.605481	419.916	0.32528	443.048	0.264889	423.461	0.865654	404.823	0.987445	421.078	0.809864	402.446	0.555097	413.195	0.250834	402.539	0.765206	404.739	1.00147	402.446	0.555097	413.195	0.250834	404.024	0.504757
392.934	0.686098	419.482	1.08565	431.576	0.811859	405.026	1.00716	396.581	0.984483	432.761	0.839414	413.876	0.887944	436.445	0.581237	411.754	0.800501	422.422	0.439983	398.986	0.80496	423.728	0.630496	414.079	0.602094	420.218	0.325662	443.331	0.25997	423.749	0.861001	405.112	0.985376	421.343	0.813763	402.757	0.550679	413.498	0.250411	402.828	0.756726	405.026	1.00716	402.757	0.550679	413.498	0.250411	404.328	0.49392
393.234	0.678126	419.765	1.08039	431.86	0.808541	405.314	1.01246	396.869	0.992364	433.04	0.829864	414.162	0.895386	436.702	0.578516	412.05	0.789449	422.72	0.430515	399.27	0.797867	424.024	0.623826	414.379	0.598638	420.52	0.326044	443.614	0.255043	424.037	0.856081	405.4	0.983066	421.607	0.817427	403.067	0.546248	413.801	0.25	403.118	0.748102	405.314	1.01246	403.067	0.546248	413.801	0.25	404.631	0.483113
393.534	0.670045	420.049	1.07466	432.144	0.804864	405.601	1.01737	397.157	0.999887	433.319	0.82006	414.447	0.902551	436.959	0.575656	412.347	0.778239	423.018	0.421066	399.554	0.790601	424.319	0.616995	414.68	0.595111	420.823	0.326418	443.897	0.25011	424.325	0.850897	405.689	0.980516	421.872	0.820856	403.378	0.541802	414.104	0.249594	403.407	0.739339	405.601	1.01737	403.378	0.541802	414.104	0.249594	404.935	0.472342
393.834	0.661859	420.332	1.06847	432.427	0.800831	405.888	1.02189	397.445	1.00704	433.598	0.810012	414.732	0.909432	437.215	0.572661	412.643	0.76688	423.315	0.411643	399.837	0.783163	424.614	0.610006	414.98	0.591508	421.125	0.326777	444.18	0.245175	424.613	0.845454	405.978	0.977728	422.137	0.824048	403.688	0.537337	414.407	0.249187	403.697	0.730442	405.888	1.02189	403.688	0.537337	414.407	0.249187	405.238	0.461615
394.134	0.653572	420.616	1.06182	432.711	0.796448	406.176	1.02602	397.733	1.01382	433.876	0.799733	415.018	0.916024	437.472	0.569536	412.939	0.755382	423.613	0.402254	400.121	0.775558	424.909	0.602865	415.281	0.587827	421.428	0.327112	444.463	0.240241	424.901	0.839754	406.266	0.974702	422.402	0.827004	403.999	0.53285	414.71	0.248774	403.986	0.721417	406.176	1.02602	403.999	0.53285	414.71	0.248774	405.542	0.450938
394.434	0.645186	420.899	1.05473	432.995	0.791721	406.463	1.02974	398.021	1.02021	434.155	0.789233	415.303	0.92232	437.729	0.566285	413.235	0.743754	423.911	0.392905	400.405	0.76779	425.204	0.595576	415.582	0.584064	421.73	0.327418	444.746	0.235311	425.189	0.833802	406.555	0.97144	422.666	0.829725	404.309	0.528338	415.013	0.24835	404.276	0.71227	406.463	1.02974	404.309	0.528338	415.013	0.24835	405.845	0.44032
394.734	0.636706	421.183	1.04721	433.278	0.786656	406.75	1.03305	398.309	1.02621	434.434	0.778526	415.588	0.928316	437.986	0.562915	413.532	0.732007	424.209	0.383603	400.689	0.759861	425.5	0.588145	415.882	0.580215	422.033	0.327686	445.029	0.230388	425.477	0.827603	406.843	0.967943	422.931	0.832209	404.62	0.523798	415.316	0.247908	404.565	0.703007	406.75	1.03305	404.62	0.523798	415.316	0.247908	406.149	0.429766
395.033	0.628135	421.466	1.03926	433.562	0.78126	407.037	1.03595	398.597	1.03181	434.713	0.767624	415.874	0.934007	438.243	0.559431	413.828	0.72015	424.506	0.374354	400.972	0.751776	425.795	0.580577	416.183	0.576279	422.335	0.32791	445.312	0.225476	425.765	0.821162	407.132	0.964212	423.196	0.834459	404.93	0.519227	415.619	0.247443	404.854	0.693634	407.037	1.03595	404.93	0.519227	415.619	0.247443	406.452	0.419284
395.333	0.619479	421.75	1.0309	433.846	0.775541	407.325	1.03844	398.885	1.037	434.991	0.756537	416.159	0.939389	438.499	0.555838	414.124	0.708193	424.804	0.365164	401.256	0.743539	426.09	0.572877	416.483	0.572251	422.638	0.328083	445.595	0.220577	426.053	0.814484	407.42	0.960249	423.461	0.836475	405.241	0.514623	415.923	0.246951	405.144	0.684157	407.325	1.03844	405.241	0.514623	415.923	0.246951	406.756	0.408879
395.633	0.610741	422.033	1.02214	434.13	0.769506	407.612	1.04051	399.173	1.04178	435.27	0.74528	416.444	0.944456	438.756	0.552143	414.42	0.696147	425.102	0.356041	401.54	0.735155	426.385	0.565053	416.784	0.56813	422.94	0.3282	445.878	0.215694	426.341	0.807573	407.709	0.956055	423.725	0.838259	405.551	0.509982	416.226	0.246425	405.433	0.674582	407.612	1.04051	405.551	0.509982	416.226	0.246425	407.059	0.398559
395.933	0.601925	422.317	1.01298	434.413	0.763163	407.899	1.04217	399.461	1.04613	435.549	0.733864	416.729	0.949205	439.013	0.548351	414.716	0.684021	425.4	0.346989	401.823	0.726628	426.68	0.557109	417.084	0.563912	423.243	0.328253	446.161	0.210832	426.629	0.800436	407.997	0.951633	423.99	0.839812	405.862	0.5053	416.529	0.245862	405.723	0.664916	407.899	1.04217	405.862	0.5053	416.529	0.245862	407.363	0.38833
396.233	0.593036	422.6	1.00345	434.697	0.756521	408.187	1.0434	399.748	1.05006	435.828	0.722301	417.015	0.953632	439.27	0.544468	415.013	0.671825	425.697	0.338015	402.107	0.717964	426.975	0.549053	417.385	0.559597	423.545	0.328236	446.445	0.205991	426.917	0.793078	408.286	0.946983	424.255	0.841136	406.172	0.500577	416.832	0.245257	406.012	0.655166	408.187	1.0434	406.172	0.500577	416.832	0.245257	407.666	0.378196
396.533	0.584079	422.884	0.993549	434.981	0.749587	408.474	1.04422	400.036	1.05355	436.106	0.710605	417.3	0.957734	439.527	0.5405	415.309	0.65957	425.995	0.329124	402.391	0.709167	427.271	0.54089	417.685	0.555181	423.848	0.328145	446.728	0.201177	427.205	0.785506	408.574	0.942109	424.52	0.842233	406.483	0.495808	417.135	0.244606	406.302	0.645337	408.474	1.04422	406.483	0.495808	417.135	0.244606	407.97	0.368165
396.833	0.575058	423.167	0.983296	435.264	0.742372	408.761	1.04461	400.324	1.05661	436.385	0.698787	417.585	0.961509	439.783	0.536454	415.605	0.647265	426.293	0.320322	402.675	0.700243	427.566	0.532627	417.986	0.550664	424.15	0.327973	447.011	0.196391	427.493	0.777725	408.863	0.937012	424.784	0.843106	406.793	0.490992	417.438	0.243904	406.591	0.635437	408.761	1.04461	406.793	0.490992	417.438	0.243904	408.273	0.358242
397.132	0.565979	423.451	0.972701	435.548	0.734884	409.049	1.04459	400.612	1.05923	436.664	0.686859	417.871	0.964954	440.04	0.532337	415.901	0.634921	426.591	0.311613	402.958	0.691197	427.861	0.524272	418.286	0.546044	424.452	0.327715	447.294	0.191637	427.781	0.769741	409.151	0.931694	425.049	0.843757	407.104	0.486125	417.741	0.243148	406.88	0.625472	409.049	1.04459	407.104	0.486125	417.741	0.243148	408.577	0.348432
397.432	0.556847	423.734	0.96178	435.832	0.727134	409.336	1.04414	400.9	1.0614	436.943	0.674835	418.156	0.968066	440.297	0.528154	416.198	0.622547	426.888	0.303003	403.242	0.682036	428.156	0.51583	418.587	0.541319	424.755	0.327367	447.577	0.186917	428.069	0.761562	409.44	0.926157	425.314	0.84419	407.414	0.481207	418.044	0.242335	407.17	0.615449	409.336	1.04414	407.414	0.481207	418.044	0.242335	408.88	0.33874
397.732	0.547665	424.018	0.950545	436.115	0.71913	409.623	1.04327	401.188	1.06312	437.221	0.662726	418.441	0.970844	440.554	0.523912	416.494	0.610154	427.186	0.294497	403.526	0.672765	428.451	0.507309	418.887	0.536489	425.057	0.326924	447.86	0.182235	428.357	0.753194	409.728	0.920404	425.579	0.844407	407.725	0.476234	418.347	0.24146	407.459	0.605374	409.623	1.04327	407.725	0.476234	418.347	0.24146	409.184	0.329171
398.032	0.538441	424.301	0.939011	436.399	0.710884	409.91	1.04199	401.476	1.06439	437.5	0.650544	418.727	0.973286	440.811	0.519618	416.79	0.59775	427.484	0.286099	403.809	0.66339	428.746	0.498717	419.188	0.531553	425.36	0.326382	448.143	0.177592	428.645	0.744644	410.017	0.914439	425.843	0.844412	408.035	0.471205	418.651	0.240521	407.749	0.595255	409.91	1.04199	408.035	0.471205	418.651	0.240521	409.487	0.31973
398.332	0.529179	424.584	0.927193	436.683	0.702405	410.198	1.04029	401.764	1.06521	437.779	0.638301	419.012	0.975391	441.067	0.515279	417.086	0.585347	427.782	0.277812	404.093	0.653917	429.042	0.49006	419.488	0.526511	425.662	0.325737	448.426	0.172992	428.933	0.735919	410.305	0.908262	426.108	0.844209	408.346	0.466118	418.954	0.239515	408.038	0.585098	410.198	1.04029	408.346	0.466118	418.954	0.239515	409.791	0.310421
398.632	0.519884	424.868	0.915103	436.967	0.693705	410.485	1.03818	402.052	1.06558	438.058	0.62601	419.297	0.977159	441.324	0.510901	417.383	0.572952	428.079	0.269643	404.377	0.644353	429.337	0.481345	419.789	0.521364	425.965	0.324985	448.709	0.168436	429.221	0.727027	410.594	0.901878	426.373	0.8438	408.656	0.460972	419.257	0.23844	408.328	0.574911	410.485	1.03818	408.656	0.460972	419.257	0.23844	410.094	0.301248
398.932	0.510562	425.151	0.902759	437.25	0.684793	410.772	1.03566	402.34	1.06549	438.336	0.613681	419.583	0.978588	441.581	0.50649	417.679	0.560577	428.377	0.261593	404.661	0.634705	429.632	0.472581	420.09	0.51611	426.267	0.324122	448.992	0.163929	429.509	0.717974	410.882	0.895289	426.638	0.84319	408.967	0.455766	419.56	0.237294	408.617	0.564699	410.772	1.03566	408.967	0.455766	419.56	0.237294	410.398	0.292215
399.231	0.501219	425.435	0.890173	437.534	0.675682	411.06	1.03273	402.628	1.06495	438.615	0.601326	419.868	0.97968	441.838	0.502054	417.975	0.548229	428.675	0.253667	404.944	0.624979	429.927	0.463774	420.39	0.510752	426.57	0.323147	449.275	0.159471	429.797	0.708769	411.171	0.888498	426.902	0.842383	409.277	0.450499	419.863	0.236073	408.906	0.55447	411.06	1.03273	409.277	0.450499	419.863	0.236073	410.701	0.283326
399.531	0.49186	425.718	0.877361	437.818	0.666381	411.347	1.02939	402.916	1.06395	438.894	0.588958	420.153	0.980433	442.095	0.4976	418.271	0.535919	428.973	0.245867	405.228	0.615181	430.222	0.454933	420.691	0.505289	426.872	0.322057	449.558	0.155066	430.085	0.69942	411.459	0.881509	427.167	0.841383	409.588	0.44517	420.166	0.234777	409.196	0.54423	411.347	1.02939	409.588	0.44517	420.166	0.234777	411.005	0.274585
399.831	0.482491	426.002	0.864339	438.101	0.656903	411.634	1.02566	403.204	1.0625	439.173	0.576586	420.438	0.980849	442.351	0.493133	418.567	0.523655	429.27	0.238198	405.512	0.605319	430.517	0.446063	420.991	0.499723	427.175	0.320849	449.841	0.150714	430.373	0.689933	411.748	0.874326	427.432	0.840195	409.899	0.439779	420.469	0.233405	409.485	0.533987	411.634	1.02566	409.899	0.439779	420.469	0.233405	411.308	0.265994
400.131	0.473117	426.285	0.851121	438.385	0.647257	411.922	1.02154	403.492	1.0606	439.451	0.564222	420.724	0.980928	442.608	0.48866	418.864	0.511446	429.568	0.230662	405.796	0.5954	430.813	0.437174	421.292	0.494055	427.477	0.319521	450.124	0.14642	430.661	0.680316	412.037	0.866951	427.697	0.838823	410.209	0.434325	420.772	0.231955	409.775	0.523746	411.922	1.02154	410.209	0.434325	420.772	0.231955	411.612	0.257556
400.431	0.463745	426.569	0.837722	438.669	0.637457	412.209	1.01702	403.779	1.05825	439.73	0.551876	421.009	0.980672	442.865	0.484189	419.16	0.499301	429.866	0.223262	406.079	0.58543	431.108	0.428271	421.592	0.488287	427.78	0.318073	450.408	0.142183	430.949	0.670579	412.325	0.859389	427.961	0.837272	410.52	0.428809	421.075	0.230426	410.064	0.513516	412.209	1.01702	410.52	0.428809	421.075	0.230426	411.915	0.249274
400.731	0.454379	426.852	0.824158	438.952	0.627512	412.496	1.01212	404.067	1.05546	440.009	0.539559	421.294	0.980082	443.122	0.479725	419.456	0.487227	430.164	0.215999	406.363	0.575416	431.403	0.419364	421.893	0.482422	428.082	0.316502	450.691	0.138007	431.237	0.660728	412.614	0.851643	428.226	0.835545	410.83	0.423231	421.379	0.228817	410.354	0.503301	412.496	1.01212	410.83	0.423231	421.379	0.228817	412.219	0.241151
401.031	0.445027	427.136	0.810444	439.236	0.617435	412.783	1.00685	404.355	1.05222	440.288	0.527281	421.58	0.979161	443.379	0.475276	419.752	0.475234	430.461	0.208877	406.647	0.565366	431.698	0.410459	422.193	0.476461	428.384	0.314808	450.974	0.133893	431.525	0.650772	412.902	0.843718	428.491	0.833649	411.141	0.417592	421.682	0.227129	410.643	0.493109	412.783	1.00685	411.141	0.417592	421.682	0.227129	412.522	0.233188
401.33	0.435692	427.419	0.796595	439.52	0.607237	413.071	1.0012	404.643	1.04854	440.566	0.515051	421.865	0.977909	443.635	0.470846	420.049	0.463329	430.759	0.201896	406.93	0.555287	431.993	0.401563	422.494	0.470407	428.687	0.31299	451.257	0.129843	431.813	0.64072	413.191	0.835617	428.756	0.831588	411.451	0.411892	421.985	0.22536	410.932	0.482947	413.071	1.0012	411.451	0.411892	421.985	0.22536	412.826	0.225388
401.63	0.426382	427.703	0.782625	439.803	0.596928	413.358	0.995187	404.931	1.04442	440.845	0.50288	422.15	0.976329	443.892	0.466443	420.345	0.45152	431.057	0.195059	407.214	0.545186	432.289	0.392683	422.794	0.464263	428.989	0.311049	451.54	0.125858	432.101	0.630578	413.479	0.827346	429.02	0.829366	411.762	0.406132	422.288	0.223512	411.222	0.472819	413.358	0.995187	411.762	0.406132	422.288	0.223512	413.129	0.217752
401.93	0.417102	427.986	0.768551	440.087	0.586522	413.645	0.988818	405.219	1.03988	441.124	0.490777	422.436	0.974425	444.149	0.462073	420.641	0.439814	431.355	0.188367	407.498	0.53507	432.584	0.383827	423.095	0.458032	429.292	0.308984	451.823	0.121939	432.389	0.620356	413.768	0.818908	429.285	0.826989	412.072	0.400315	422.591	0.221585	411.511	0.462734	413.645	0.988818	412.072	0.400315	422.591	0.221585	413.433	0.210282
402.23	0.407856	428.27	0.754387	440.371	0.576028	413.933	0.9821	405.507	1.03491	441.403	0.478751	422.721	0.972199	444.406	0.457742	420.937	0.428219	431.652	0.181821	407.782	0.524946	432.879	0.375002	423.395	0.451717	429.594	0.306796	452.106	0.118088	432.677	0.610062	414.056	0.810309	429.55	0.824462	412.383	0.394441	422.894	0.219579	411.801	0.452696	413.933	0.9821	412.383	0.394441	422.894	0.219579	413.736	0.202978
402.53	0.398652	428.553	0.740146	440.655	0.565458	414.22	0.975039	405.795	1.02952	441.681	0.46681	423.006	0.969654	444.663	0.453455	421.234	0.41674	431.95	0.175423	408.065	0.51482	433.174	0.366214	423.696	0.445321	429.897	0.304486	452.389	0.114307	432.965	0.599704	414.345	0.801553	429.815	0.821789	412.693	0.388513	423.197	0.217494	412.09	0.442712	414.22	0.975039	412.693	0.388513	423.197	0.217494	414.04	0.195843
402.83	0.389495	428.837	0.725845	440.938	0.554824	414.507	0.967646	406.083	1.02372	441.96	0.454962	423.291	0.966794	444.92	0.449218	421.53	0.405386	432.248	0.169172	408.349	0.504701	433.469	0.357471	423.997	0.43885	430.199	0.302055	452.672	0.110596	433.253	0.589289	414.633	0.792645	430.079	0.818976	413.004	0.382532	423.5	0.215334	412.38	0.432788	414.507	0.967646	413.004	0.382532	423.5	0.215334	414.343	0.188875
403.13	0.380389	429.12	0.711497	441.222	0.544136	414.795	0.959926	406.371	1.01751	442.239	0.443217	423.577	0.963623	445.176	0.445037	421.826	0.394162	432.546	0.16307	408.633	0.494595	433.764	0.348778	424.297	0.432306	430.502	0.299505	452.955	0.106956	433.541	0.578828	414.922	0.783591	430.344	0.816027	413.314	0.376502	423.803	0.213097	412.669	0.422929	414.795	0.959926	413.314	0.376502	423.803	0.213097	414.646	0.182076
403.429	0.371341	429.404	0.697116	441.506	0.533404	415.082	0.951891	406.659	1.01091	442.517	0.431581	423.862	0.960144	445.433	0.440918	422.122	0.383074	432.844	0.157117	408.916	0.484509	434.06	0.340142	424.598	0.425693	430.804	0.296836	453.238	0.103387	433.829	0.568327	415.21	0.774395	430.609	0.812948	413.625	0.370424	424.107	0.210787	412.958	0.413142	415.082	0.951891	413.625	0.370424	424.107	0.210787	414.95	0.175447
403.729	0.362355	429.687	0.682716	441.789	0.522641	415.369	0.943548	406.947	1.00391	442.796	0.420062	424.147	0.956362	445.69	0.436865	422.418	0.372129	433.141	0.151313	409.2	0.47445	434.355	0.33157	424.898	0.419017	431.107	0.294052	453.521	0.0998922	434.117	0.557794	415.499	0.765064	430.873	0.809743	413.935	0.364301	424.41	0.208404	413.248	0.40343	415.369	0.943548	413.935	0.364301	424.41	0.208404	415.253	0.168986
404.029	0.353437	429.971	0.66831	442.073	0.511856	415.656	0.934908	407.235	0.996537	443.075	0.408666	424.433	0.952281	445.947	0.432883	422.715	0.361331	433.439	0.145658	409.484	0.464424	434.65	0.323067	425.199	0.412282	431.409	0.291154	453.804	0.0964704	434.405	0.547238	415.787	0.755602	431.138	0.806417	414.246	0.358137	424.713	0.205951	413.537	0.393801	415.656	0.934908	414.246	0.358137	424.713	0.205951	415.557	0.162695
404.329	0.344591	430.254	0.653912	442.357	0.501059	415.944	0.925979	407.523	0.988789	443.354	0.397401	424.718	0.947906	446.204	0.428978	423.011	0.350685	433.737	0.140151	409.768	0.454438	434.945	0.31464	425.499	0.405492	431.712	0.288145	454.087	0.0931225	434.693	0.536667	416.076	0.746015	431.403	0.802975	414.556	0.351934	425.016	0.203429	413.827	0.384258	415.944	0.925979	414.556	0.351934	425.016	0.203429	415.86	0.156572
404.629	0.335824	430.537	0.639535	442.64	0.490261	416.231	0.916771	407.81	0.980678	443.632	0.386273	425.003	0.943242	446.46	0.425153	423.307	0.340197	434.035	0.134793	410.051	0.444499	435.24	0.306293	425.8	0.398652	432.014	0.285028	454.371	0.089849	434.981	0.526089	416.364	0.73631	431.668	0.799422	414.867	0.345697	425.319	0.200842	414.116	0.374807	416.231	0.916771	414.867	0.345697	425.319	0.200842	416.164	0.150617
404.929	0.327138	430.821	0.625192	442.924	0.479473	416.518	0.907295	408.098	0.972213	443.911	0.375288	425.289	0.938294	446.717	0.421414	423.603	0.329872	434.332	0.129582	410.335	0.434613	435.535	0.298033	426.1	0.391767	432.316	0.281806	454.654	0.0866502	435.269	0.515511	416.653	0.726492	431.932	0.795762	415.177	0.339428	425.622	0.19819	414.406	0.365452	416.518	0.907295	415.177	0.339428	425.622	0.19819	416.467	0.144829
405.229	0.31854	431.104	0.610894	443.208	0.468702	416.806	0.89756	408.386	0.963405	444.19	0.364451	425.574	0.933067	446.974	0.417765	423.9	0.319712	434.63	0.124517	410.619	0.424785	435.831	0.289865	426.401	0.384842	432.619	0.278482	454.937	0.0835262	435.557	0.504942	416.941	0.716567	432.197	0.792001	415.488	0.333131	425.925	0.195478	414.695	0.356198	416.806	0.89756	415.488	0.333131	425.925	0.195478	416.771	0.139206
405.528	0.310033	431.388	0.596654	443.492	0.45796	417.093	0.887578	408.674	0.954263	444.469	0.353767	425.859	0.927566	447.231	0.414209	424.196	0.309723	434.928	0.119599	410.902	0.415023	436.126	0.281793	426.701	0.377883	432.921	0.27506	455.22	0.0804773	435.845	0.494388	417.23	0.706541	432.462	0.788141	415.798	0.326811	426.228	0.192707	414.985	0.347049	417.093	0.887578	415.798	0.326811	426.228	0.192707	417.074	0.133749
405.828	0.301621	431.671	0.582483	443.775	0.447255	417.38	0.877358	408.962	0.944799	444.747	0.343243	426.145	0.921798	447.488	0.41075	424.492	0.299907	435.226	0.114825	411.186	0.405331	436.421	0.273823	427.002	0.370895	433.224	0.271543	455.503	0.0775034	436.133	0.483857	417.518	0.696422	432.727	0.784189	416.109	0.320471	426.531	0.189881	415.274	0.33801	417.38	0.877358	416.109	0.320471	426.531	0.189881	417.378	0.128455
406.128	0.29331	431.955	0.568392	444.059	0.436596	417.668	0.866911	409.25	0.935023	445.026	0.332881	426.43	0.915768	447.744	0.407391	424.788	0.290268	435.523	0.110194	411.47	0.395716	436.716	0.265958	427.302	0.363882	433.526	0.267935	455.786	0.0746045	436.421	0.473357	417.807	0.686214	432.991	0.780147	416.419	0.314114	426.835	0.187002	415.563	0.329084	417.668	0.866911	416.419	0.314114	426.835	0.187002	417.681	0.123323
406.428	0.285103	432.238	0.554393	444.343	0.425992	417.955	0.856249	409.538	0.924947	445.305	0.322687	426.715	0.909482	448.001	0.404137	425.085	0.280809	435.821	0.105705	411.754	0.386183	437.011	0.258204	427.603	0.356851	433.829	0.264241	456.069	0.0717803	436.709	0.462894	418.096	0.675926	433.256	0.77602	416.73	0.307747	427.138	0.184073	415.853	0.320274	417.955	0.856249	416.73	0.307747	427.138	0.184073	417.985	0.118352
406.728	0.277003	432.522	0.540496	444.626	0.415452	418.242	0.845382	409.826	0.914583	445.584	0.312664	427	0.902946	448.258	0.40099	425.381	0.271533	436.119	0.101357	412.037	0.376738	437.307	0.250563	427.903	0.349807	434.131	0.260465	456.352	0.0690306	436.997	0.452477	418.384	0.665562	433.521	0.771812	417.041	0.301372	427.441	0.181098	416.142	0.311586	418.242	0.845382	417.041	0.301372	427.441	0.181098	418.288	0.113539
407.028	0.269014	432.805	0.52671	444.91	0.404983	418.529	0.834321	410.114	0.903942	445.862	0.302815	427.286	0.896167	448.515	0.397952	425.677	0.262442	436.417	0.0971467	412.321	0.367385	437.602	0.243041	428.204	0.342755	434.434	0.25661	456.635	0.0663551	437.285	0.442111	418.673	0.65513	433.786	0.767527	417.351	0.294994	427.744	0.17808	416.432	0.303021	418.529	0.834321	417.351	0.294994	427.744	0.17808	418.592	0.108882
407.328	0.26114	433.089	0.513046	445.194	0.394593	418.817	0.823078	410.402	0.893036	446.141	0.293145	427.571	0.88915	448.772	0.395026	425.973	0.253537	436.714	0.0930733	412.605	0.35813	437.897	0.23564	428.505	0.335701	434.736	0.252682	456.918	0.0637533	437.573	0.431803	418.961	0.644637	434.05	0.763169	417.662	0.288618	428.047	0.175022	416.721	0.294583	418.817	0.823078	417.662	0.288618	428.047	0.175022	418.895	0.104379
407.627	0.253384	433.372	0.499513	445.477	0.38429	419.104	0.811663	410.69	0.881878	446.42	0.283655	427.856	0.881902	449.028	0.392214	426.269	0.244822	437.012	0.0891347	412.889	0.348977	438.192	0.228364	428.805	0.32865	435.039	0.248685	457.201	0.0612246	437.86	0.421561	419.25	0.63409	434.315	0.758741	417.972	0.282247	428.35	0.171927	417.011	0.286275	419.104	0.811663	417.972	0.282247	428.35	0.171927	419.199	0.100029
407.927	0.245749	433.656	0.486118	445.761	0.374081	419.391	0.800087	410.978	0.870481	446.699	0.274348	428.142	0.87443	449.285	0.389519	426.566	0.236296	437.31	0.0853288	413.172	0.339931	438.487	0.221216	429.106	0.321607	435.341	0.244623	457.484	0.0587686	438.148	0.411389	419.538	0.623495	434.58	0.754246	418.283	0.275887	428.653	0.1688	417.3	0.278099	419.391	0.800087	418.283	0.275887	428.653	0.1688	419.502	0.0958276
408.227	0.238237	433.939	0.472872	446.045	0.363973	419.679	0.788363	411.266	0.858856	446.977	0.265227	428.427	0.866741	449.542	0.386941	426.862	0.227962	437.608	0.0816535	413.456	0.330995	438.782	0.214198	429.406	0.314578	435.644	0.240503	457.767	0.0563846	438.436	0.401295	419.827	0.612858	434.845	0.749688	418.593	0.269543	428.956	0.165642	417.589	0.270059	419.679	0.788363	418.593	0.269543	428.956	0.165642	419.806	0.0917738
408.527	0.230852	434.223	0.459781	446.328	0.353973	419.966	0.776501	411.553	0.847016	447.256	0.256294	428.712	0.858842	449.799	0.384483	427.158	0.21982	437.905	0.0781065	413.74	0.322175	439.078	0.207312	429.707	0.307568	435.946	0.236327	458.051	0.0540717	438.724	0.391284	420.115	0.602188	435.109	0.74507	418.904	0.263217	429.26	0.162458	417.879	0.262155	419.966	0.776501	418.904	0.263217	429.26	0.162458	420.109	0.0878644
408.827	0.223595	434.506	0.446854	446.612	0.344086	420.253	0.764512	411.841	0.834976	447.535	0.247549	428.998	0.850739	450.056	0.382144	427.454	0.211871	438.203	0.0746854	414.023	0.313473	439.373	0.200562	430.007	0.300583	436.248	0.232102	458.334	0.0518293	439.012	0.381362	420.404	0.591491	435.374	0.740394	419.214	0.256916	429.563	0.159252	418.168	0.254391	420.253	0.764512	419.214	0.256916	429.563	0.159252	420.413	0.0840969
409.127	0.216469	434.79	0.434096	446.896	0.334319	420.541	0.752408	412.129	0.822746	447.814	0.238994	429.283	0.842439	450.312	0.379927	427.751	0.204115	438.501	0.0713878	414.307	0.304894	439.668	0.19395	430.308	0.293628	436.551	0.227833	458.617	0.0496564	439.3	0.371534	420.692	0.580774	435.639	0.735664	419.525	0.250644	429.866	0.156026	418.458	0.246767	420.541	0.752408	419.525	0.250644	429.866	0.156026	420.716	0.0804685
409.427	0.209476	435.073	0.421515	447.18	0.324677	420.828	0.7402	412.417	0.810341	448.092	0.230631	429.568	0.833949	450.569	0.377832	428.047	0.196552	438.799	0.0682114	414.591	0.296441	439.963	0.187476	430.608	0.286707	436.853	0.223523	458.9	0.0475522	439.588	0.361807	420.981	0.570043	435.904	0.730883	419.835	0.244404	430.169	0.152784	418.747	0.239286	420.828	0.7402	419.835	0.244404	430.169	0.152784	421.02	0.0769762
409.726	0.202618	435.357	0.409118	447.463	0.315165	421.115	0.727898	412.705	0.797774	448.371	0.22246	429.854	0.825278	450.826	0.375859	428.343	0.189181	439.096	0.0651535	414.875	0.288116	440.258	0.181142	430.909	0.279826	437.156	0.219179	459.183	0.0455157	439.876	0.352184	421.269	0.559306	436.168	0.726051	420.146	0.238201	430.472	0.14953	419.037	0.231949	421.115	0.727898	420.146	0.238201	430.472	0.14953	421.323	0.0736172
410.026	0.195896	435.64	0.396908	447.747	0.305789	421.402	0.715515	412.993	0.785058	448.65	0.21448	430.139	0.816431	451.083	0.374008	428.639	0.182004	439.394	0.0622115	415.158	0.279924	440.553	0.17495	431.209	0.27299	437.458	0.214806	459.466	0.0435458	440.164	0.342671	421.558	0.54857	436.433	0.721173	420.456	0.232041	430.775	0.146268	419.326	0.224757	421.402	0.715515	420.456	0.232041	430.775	0.146268	421.627	0.0703885
410.326	0.189312	435.924	0.384893	448.031	0.296553	421.69	0.70306	413.281	0.772206	448.929	0.206694	430.424	0.807416	451.34	0.372279	428.935	0.175018	439.692	0.0593828	415.442	0.271866	440.849	0.168901	431.51	0.266202	437.761	0.210408	459.749	0.0416415	440.452	0.333272	421.846	0.537842	436.698	0.71625	420.767	0.225926	431.078	0.143	419.615	0.21771	421.69	0.70306	420.767	0.225926	431.078	0.143	421.93	0.0672871
410.626	0.182866	436.207	0.373076	448.314	0.287461	421.977	0.690546	413.569	0.75923	449.207	0.1991	430.709	0.79824	451.596	0.370671	429.232	0.168223	439.99	0.0566647	415.726	0.263945	441.144	0.162995	431.81	0.259469	438.063	0.20599	460.032	0.0398017	440.74	0.323992	422.135	0.527127	436.963	0.711283	421.077	0.219861	431.381	0.13973	419.905	0.210811	421.977	0.690546	421.077	0.219861	431.381	0.13973	422.234	0.0643098
410.926	0.17656	436.49	0.361463	448.598	0.278517	422.264	0.677981	413.857	0.746145	449.486	0.191698	430.995	0.788912	451.853	0.369183	429.528	0.161618	440.287	0.0540544	416.009	0.256163	441.439	0.157232	432.111	0.252795	438.366	0.201558	460.315	0.0380253	441.028	0.314835	422.423	0.516434	437.227	0.706275	421.388	0.21385	431.684	0.136461	420.194	0.204059	422.264	0.677981	421.388	0.21385	431.684	0.136461	422.537	0.0614534
411.226	0.170394	436.774	0.350056	448.882	0.269725	422.552	0.665378	414.145	0.732963	449.765	0.184487	431.28	0.779438	452.11	0.367815	429.824	0.155201	440.585	0.0515494	416.293	0.248522	441.734	0.151614	432.411	0.246183	438.668	0.197115	460.598	0.036311	441.316	0.305805	422.712	0.505769	437.492	0.701228	421.698	0.207897	431.988	0.133197	420.484	0.197455	422.552	0.665378	421.698	0.207897	431.988	0.133197	422.841	0.058715
411.526	0.164369	437.057	0.338861	449.165	0.261088	422.839	0.652747	414.433	0.719696	450.044	0.177467	431.565	0.769825	452.367	0.366565	430.12	0.148971	440.883	0.0491466	416.577	0.241024	442.029	0.14614	432.712	0.239638	438.971	0.192668	460.881	0.0346576	441.604	0.296905	423	0.495138	437.757	0.696142	422.009	0.202007	432.291	0.129941	420.773	0.190999	422.839	0.652747	422.009	0.202007	432.291	0.129941	423.144	0.0560912
411.826	0.158486	437.341	0.327879	449.449	0.25261	423.126	0.640097	414.721	0.706359	450.322	0.170637	431.851	0.760081	452.624	0.365432	430.417	0.142926	441.181	0.0468435	416.861	0.23367	442.325	0.140811	433.013	0.233164	439.273	0.188221	461.164	0.0330639	441.892	0.28814	423.289	0.484548	438.022	0.69102	422.319	0.196181	432.594	0.126696	421.063	0.18469	423.126	0.640097	422.319	0.196181	432.594	0.126696	423.448	0.0535788
412.125	0.152745	437.624	0.317115	449.733	0.244292	423.414	0.627439	415.009	0.692963	450.601	0.163995	432.136	0.750214	452.88	0.364414	430.713	0.137064	441.478	0.0446371	417.144	0.226461	442.62	0.135625	433.313	0.226765	439.576	0.183778	461.447	0.0315286	442.18	0.279511	423.578	0.474005	438.286	0.685862	422.63	0.190425	432.897	0.123465	421.352	0.178529	423.414	0.627439	422.63	0.190425	432.897	0.123465	423.751	0.0511747
412.425	0.147144	437.908	0.306569	450.017	0.236137	423.701	0.614783	415.297	0.67952	450.88	0.15754	432.421	0.74023	453.137	0.363509	431.009	0.131383	441.776	0.0425247	417.428	0.2194	442.915	0.130582	433.614	0.220444	439.878	0.179344	461.73	0.0300505	442.468	0.271023	423.866	0.463516	438.551	0.68067	422.94	0.184741	433.2	0.120252	421.641	0.172516	423.701	0.614783	422.94	0.184741	433.2	0.120252	424.055	0.0488756
412.725	0.141686	438.191	0.296245	450.3	0.228147	423.988	0.602139	415.584	0.666045	451.159	0.15127	432.707	0.730139	453.394	0.362714	431.305	0.125881	442.074	0.0405035	417.712	0.212486	443.21	0.125681	433.914	0.214205	440.18	0.174924	462.014	0.0286282	442.756	0.262677	424.155	0.453088	438.816	0.675444	423.251	0.179133	433.503	0.117058	421.931	0.16665	423.988	0.602139	423.251	0.179133	433.503	0.117058	424.358	0.0466783
413.025	0.136368	438.475	0.286144	450.584	0.220324	424.275	0.589516	415.872	0.652547	451.437	0.145184	432.992	0.719946	453.651	0.362028	431.602	0.120556	442.372	0.0385707	417.995	0.205719	443.505	0.120923	434.215	0.208052	440.483	0.170522	462.297	0.0272604	443.044	0.254477	424.443	0.442725	439.081	0.670186	423.561	0.173604	433.806	0.113887	422.22	0.16093	424.275	0.589516	423.561	0.173604	433.806	0.113887	424.662	0.0445796
413.325	0.131191	438.758	0.276267	450.868	0.212669	424.563	0.576924	416.16	0.63904	451.716	0.139279	433.277	0.709659	453.908	0.361447	431.898	0.115404	442.669	0.0367235	418.279	0.199102	443.8	0.116304	434.515	0.201986	440.785	0.166142	462.58	0.0259457	443.332	0.246425	424.732	0.432434	439.345	0.664895	423.872	0.168156	434.109	0.110742	422.51	0.155355	424.563	0.576924	423.872	0.168156	434.109	0.110742	424.965	0.0425762
413.625	0.126153	439.042	0.266614	451.151	0.205184	424.85	0.564371	416.448	0.625535	451.995	0.133553	433.563	0.699286	454.164	0.360968	432.194	0.110424	442.967	0.0349592	418.563	0.192633	444.096	0.111825	434.816	0.196012	441.088	0.161789	462.863	0.0246829	443.62	0.238522	425.02	0.422222	439.61	0.659573	424.183	0.162793	434.412	0.107624	422.799	0.149924	424.85	0.564371	424.183	0.162793	434.412	0.107624	425.269	0.040665
413.925	0.121255	439.325	0.257188	451.435	0.19787	425.137	0.551867	416.736	0.612044	452.273	0.128005	433.848	0.688834	454.421	0.360589	432.49	0.105612	443.265	0.0332749	418.847	0.186313	444.391	0.107484	435.116	0.190132	441.39	0.157465	463.146	0.0234705	443.908	0.230771	425.309	0.412093	439.875	0.654221	424.493	0.157517	434.716	0.104538	423.089	0.144637	425.137	0.551867	424.493	0.157517	434.716	0.104538	425.572	0.0388429
414.224	0.116495	439.609	0.247988	451.719	0.190726	425.425	0.539421	417.024	0.598578	452.552	0.122631	434.133	0.678311	454.678	0.360306	432.786	0.100965	443.563	0.031668	419.13	0.180142	444.686	0.103279	435.417	0.184348	441.693	0.153177	463.429	0.0223072	444.196	0.223172	425.597	0.402053	440.14	0.648838	424.804	0.152331	435.019	0.101484	423.378	0.139492	425.425	0.539421	424.804	0.152331	435.019	0.101484	425.876	0.0371066
414.524	0.111871	439.892	0.239014	452.002	0.183754	425.712	0.52704	417.312	0.585148	452.831	0.117429	434.418	0.667723	454.935	0.360115	433.083	0.0964804	443.86	0.0301358	419.414	0.174119	444.981	0.0992087	435.717	0.178663	441.995	0.148926	463.712	0.0211916	444.484	0.215728	425.886	0.392107	440.404	0.643424	425.114	0.147237	435.322	0.0984662	423.667	0.134488	425.712	0.52704	425.114	0.147237	435.322	0.0984662	426.179	0.0354531
414.824	0.107383	440.176	0.230265	452.286	0.176954	425.999	0.514732	417.6	0.571765	453.11	0.112397	434.704	0.657079	455.192	0.360013	433.379	0.0921553	444.158	0.0286757	419.698	0.168243	445.276	0.0952711	436.018	0.173079	442.298	0.144717	463.995	0.0201224	444.772	0.20844	426.174	0.382261	440.669	0.637981	425.425	0.142236	435.625	0.0954856	423.957	0.129623	425.999	0.514732	425.425	0.142236	435.625	0.0954856	426.483	0.0338794
415.124	0.103029	440.459	0.221741	452.57	0.170326	426.287	0.502507	417.888	0.558439	453.388	0.107531	434.989	0.646385	455.448	0.359996	433.675	0.0879862	444.456	0.027285	419.982	0.162515	445.571	0.0914643	436.318	0.167598	442.6	0.140552	464.278	0.0190983	445.06	0.201308	426.463	0.37252	440.934	0.632508	425.735	0.137331	435.928	0.0925446	424.246	0.124896	426.287	0.502507	425.735	0.137331	435.928	0.0925446	426.786	0.0323824
415.424	0.0988074	440.743	0.213441	452.853	0.163868	426.574	0.49037	418.176	0.54518	453.667	0.102829	435.274	0.635649	455.705	0.360061	433.971	0.0839699	444.754	0.025961	420.265	0.156933	445.867	0.0877862	436.619	0.162221	442.903	0.136437	464.561	0.0181179	445.348	0.194333	426.751	0.362889	441.199	0.627005	426.046	0.132523	436.231	0.089645	424.536	0.120304	426.574	0.49037	426.046	0.132523	436.231	0.089645	427.09	0.0309591
415.724	0.0947171	441.026	0.205365	453.137	0.157581	426.861	0.47833	418.464	0.531998	453.946	0.0982878	435.56	0.624877	455.962	0.360201	434.268	0.080103	445.051	0.0247014	420.549	0.151497	446.162	0.0842347	436.919	0.15695	443.205	0.132372	464.844	0.0171797	445.636	0.187516	427.04	0.353371	441.463	0.621473	426.356	0.127815	436.534	0.0867888	424.825	0.115846	426.861	0.47833	426.356	0.127815	436.534	0.0867888	427.393	0.0296066
416.024	0.0907559	441.31	0.197509	453.421	0.151464	427.149	0.466394	418.752	0.518904	454.225	0.0939042	435.845	0.614077	456.219	0.360415	434.564	0.0763821	445.349	0.0235036	420.833	0.146204	446.457	0.0808074	437.22	0.151786	443.508	0.128362	465.127	0.0162827	445.924	0.180857	427.328	0.343972	441.728	0.615911	426.667	0.123206	436.837	0.0839775	425.115	0.111521	427.149	0.466394	426.667	0.123206	436.837	0.0839775	427.697	0.0283221
416.323	0.086922	441.593	0.189874	453.705	0.145516	427.436	0.454569	419.04	0.505905	454.503	0.0896751	436.13	0.603256	456.476	0.360696	434.86	0.0728038	445.647	0.0223651	421.116	0.141054	446.752	0.077502	437.521	0.146731	443.81	0.124409	465.41	0.0154253	446.212	0.174355	427.617	0.334695	441.993	0.610319	426.977	0.118699	437.14	0.0812128	425.404	0.107325	427.436	0.454569	426.977	0.118699	437.14	0.0812128	428	0.0271026
416.623	0.0832136	441.877	0.182456	453.988	0.139736	427.723	0.44286	419.327	0.49301	454.782	0.0855973	436.416	0.592421	456.732	0.36104	435.156	0.0693646	445.945	0.0212836	421.4	0.136046	447.047	0.074316	437.821	0.141785	444.112	0.120515	465.694	0.0146063	446.5	0.168012	427.905	0.325546	442.258	0.604697	427.288	0.114294	437.444	0.078496	425.693	0.103258	427.723	0.44286	427.288	0.114294	437.444	0.078496	428.304	0.0259455
416.923	0.0796285	442.16	0.175253	454.272	0.134122	428.01	0.431275	419.615	0.480229	455.061	0.0816676	436.701	0.581578	456.989	0.361444	435.453	0.066061	446.242	0.0202566	421.684	0.131177	447.343	0.071247	438.122	0.136949	444.415	0.116684	465.977	0.0138244	446.788	0.161826	428.194	0.316526	442.522	0.599046	427.598	0.109993	437.747	0.0758286	425.983	0.0993167	428.01	0.431275	427.598	0.109993	437.747	0.0758286	428.607	0.0248481
417.223	0.0761646	442.443	0.168265	454.556	0.128674	428.298	0.419819	419.903	0.46757	455.34	0.0778827	436.986	0.570734	457.246	0.361901	435.749	0.0628894	446.54	0.0192819	421.968	0.126447	447.638	0.0682924	438.422	0.132224	444.717	0.112917	466.26	0.0130783	447.076	0.155797	428.482	0.307641	442.787	0.593364	427.909	0.105795	438.05	0.0732117	426.272	0.0954991	428.298	0.419819	427.909	0.105795	438.05	0.0732117	428.911	0.0238077
417.523	0.0728198	442.727	0.161487	454.839	0.123388	428.585	0.408497	420.191	0.455039	455.618	0.0742392	437.271	0.559897	457.503	0.362407	436.045	0.0598463	446.838	0.0183573	422.251	0.121853	447.933	0.0654494	438.723	0.127609	445.02	0.109217	466.543	0.0123669	447.364	0.149925	428.771	0.298893	443.052	0.587652	428.219	0.101701	438.353	0.0706463	426.562	0.0918028	428.585	0.408497	428.219	0.101701	438.353	0.0706463	429.214	0.0228216
417.823	0.0695917	443.01	0.154917	455.123	0.118264	428.872	0.397316	420.479	0.442646	455.897	0.0707337	437.557	0.549071	457.76	0.362957	436.341	0.0569281	447.136	0.0174806	422.535	0.117393	448.228	0.0627155	439.023	0.123106	445.322	0.105585	466.826	0.0116888	447.652	0.144209	429.059	0.290286	443.317	0.58191	428.53	0.0977122	438.656	0.0681335	426.851	0.0882257	428.872	0.397316	428.53	0.0977122	438.656	0.0681335	429.518	0.0218875
418.123	0.0664781	443.294	0.148552	455.407	0.113299	429.16	0.38628	420.767	0.430396	456.176	0.067363	437.842	0.538265	458.016	0.363546	436.637	0.0541312	447.433	0.0166496	422.819	0.113066	448.523	0.0600879	439.324	0.118715	445.625	0.102023	467.109	0.0110428	447.94	0.138647	429.348	0.281822	443.581	0.576137	428.84	0.0938277	438.959	0.065674	427.141	0.0847653	429.16	0.38628	428.84	0.0938277	438.959	0.065674	429.821	0.0210029
418.422	0.0634765	443.577	0.142389	455.69	0.108491	429.447	0.375393	421.055	0.418296	456.455	0.0641235	438.127	0.527484	458.273	0.36417	436.934	0.0514521	447.731	0.0158623	423.102	0.10887	448.818	0.0575638	439.624	0.114435	445.927	0.0985337	467.392	0.0104278	448.228	0.133239	429.637	0.273505	443.846	0.570334	429.151	0.0900478	439.262	0.0632687	427.43	0.0814191	429.447	0.375393	429.151	0.0900478	439.262	0.0632687	430.125	0.0201653
418.722	0.0605846	443.861	0.136426	455.974	0.103839	429.734	0.364661	421.343	0.406353	456.733	0.0610118	438.413	0.516735	458.53	0.364822	437.23	0.0488873	448.029	0.0151166	423.386	0.104802	449.114	0.0551405	439.925	0.110265	446.23	0.0951171	467.675	0.0098426	448.516	0.127984	429.925	0.265335	444.111	0.5645	429.461	0.0863723	439.565	0.0609181	427.719	0.0781849	429.734	0.364661	429.461	0.0863723	439.565	0.0609181	430.428	0.0193725
419.022	0.0577998	444.144	0.130658	456.258	0.0993386	430.022	0.354088	421.631	0.394573	457.012	0.0580245	438.698	0.506023	458.787	0.365497	437.526	0.0464332	448.327	0.0144107	423.67	0.10086	449.409	0.0528151	440.225	0.106206	446.532	0.091775	467.958	0.00928604	448.804	0.122879	430.214	0.257317	444.376	0.558636	429.772	0.0828008	439.868	0.0586228	428.009	0.07506	430.022	0.354088	429.772	0.0828008	439.868	0.0586228	430.732	0.0186223
419.322	0.0551197	444.428	0.125082	456.542	0.0949888	430.309	0.343676	421.919	0.382961	457.291	0.0551581	438.983	0.495355	459.044	0.366191	437.822	0.0440863	448.624	0.0137426	423.954	0.0970415	449.704	0.0505849	440.526	0.102258	446.835	0.0885086	468.241	0.008757	449.092	0.117924	430.502	0.249452	444.64	0.55274	430.082	0.0793329	440.172	0.0563831	428.298	0.0720421	430.309	0.343676	430.082	0.0793329	440.172	0.0563831	431.035	0.0179124
419.622	0.0525418	444.711	0.119695	456.825	0.0907867	430.596	0.333431	422.207	0.371522	457.57	0.0524093	439.269	0.484736	459.3	0.366898	438.119	0.0418432	448.922	0.0131104	424.237	0.0933448	449.999	0.048447	440.826	0.098418	447.137	0.0853187	468.524	0.00825441	449.38	0.113116	430.791	0.241741	444.905	0.546814	430.393	0.075968	440.475	0.0541993	428.588	0.0691285	430.596	0.333431	430.393	0.075968	440.475	0.0541993	431.339	0.0172408
419.922	0.0500635	444.995	0.114493	457.109	0.0867294	430.883	0.323355	422.495	0.360262	457.848	0.0497746	439.554	0.474172	459.557	0.367613	438.415	0.0397004	449.22	0.0125125	424.521	0.0897672	450.294	0.0463985	441.127	0.0946869	447.44	0.0822061	468.807	0.0077772	449.668	0.108455	431.079	0.234186	445.17	0.540858	430.703	0.0727052	440.778	0.0520716	428.877	0.0663167	430.883	0.323355	430.703	0.0727052	440.778	0.0520716	431.642	0.0166055
420.222	0.0476823	445.278	0.109473	457.393	0.0828144	431.171	0.313451	422.783	0.349184	458.127	0.0472507	439.839	0.463669	459.814	0.368331	438.711	0.0376545	449.518	0.011947	424.805	0.0863063	450.589	0.0444367	441.427	0.0910633	447.742	0.0791716	469.09	0.00732431	449.956	0.103937	431.368	0.226789	445.435	0.534871	431.014	0.0695437	441.081	0.0500002	429.167	0.0636043	431.171	0.313451	431.014	0.0695437	441.081	0.0500002	431.946	0.0160044
420.521	0.0453955	445.562	0.10463	457.676	0.0790388	431.458	0.303721	423.071	0.338294	458.406	0.0448342	440.125	0.453233	460.071	0.369047	439.007	0.0357021	449.816	0.0114124	425.088	0.0829596	450.885	0.0425588	441.728	0.0875461	448.044	0.0762156	469.373	0.00689476	450.244	0.0995618	431.656	0.219551	445.699	0.528853	431.325	0.0664826	441.384	0.0479849	429.456	0.0609887	431.458	0.303721	431.325	0.0664826	441.384	0.0479849	432.249	0.0154358
420.821	0.0432006	445.845	0.099961	457.96	0.0753996	431.745	0.294169	423.358	0.327594	458.685	0.0425217	440.41	0.442868	460.328	0.369755	439.304	0.03384	450.113	0.0109071	425.372	0.0797246	451.18	0.0407619	442.029	0.0841343	448.347	0.0733384	469.657	0.00648754	450.532	0.0953264	431.945	0.212472	445.964	0.522806	431.635	0.0635207	441.687	0.0460258	429.745	0.0584672	431.745	0.294169	431.635	0.0635207	441.687	0.0460258	432.553	0.0148977
421.121	0.0410951	446.129	0.0954617	458.244	0.071894	432.033	0.284797	423.646	0.317088	458.963	0.0403099	440.695	0.43258	460.584	0.370451	439.6	0.0320649	450.411	0.0104295	425.656	0.0765987	451.475	0.0390433	442.329	0.0808264	448.649	0.0705403	469.94	0.0061017	450.82	0.0912289	432.233	0.205553	446.229	0.516729	431.946	0.0606567	441.99	0.0441226	430.035	0.0560375	432.033	0.284797	431.946	0.0606567	441.99	0.0441226	432.856	0.0143885
421.421	0.0390763	446.412	0.0911284	458.527	0.068519	432.32	0.275606	423.934	0.306779	459.242	0.0381956	440.98	0.422373	460.841	0.371128	439.896	0.0303735	450.709	0.00997811	425.94	0.0735795	451.77	0.0374003	442.63	0.077621	448.952	0.0678213	470.223	0.00573631	451.108	0.0872668	432.522	0.198795	446.494	0.510622	432.256	0.0578894	442.293	0.0422751	430.324	0.053697	432.32	0.275606	432.256	0.0578894	442.293	0.0422751	433.16	0.0139065
421.721	0.0371417	446.696	0.086957	458.811	0.0652716	432.607	0.266597	424.222	0.29667	459.521	0.0361756	441.266	0.412253	461.098	0.371783	440.192	0.0287628	451.007	0.00955157	426.223	0.0706643	452.065	0.0358301	442.93	0.0745169	449.254	0.0651815	470.506	0.00539047	451.396	0.083438	432.81	0.192198	446.758	0.504487	432.567	0.0552174	442.596	0.040483	430.614	0.0514431	432.607	0.266597	432.567	0.0552174	442.596	0.040483	433.463	0.0134501
422.021	0.0352887	446.979	0.0829435	459.095	0.0621487	432.895	0.257773	424.51	0.286763	459.8	0.0342467	441.551	0.402224	461.355	0.372411	440.488	0.0272297	451.304	0.0091485	426.507	0.0678506	452.36	0.0343301	443.231	0.0715122	449.557	0.0626206	470.789	0.0050633	451.684	0.0797399	433.099	0.185762	447.023	0.498324	432.877	0.0526392	442.9	0.0387458	430.903	0.0492735	432.895	0.257773	432.877	0.0526392	442.9	0.0387458	433.767	0.0130177
422.321	0.0335148	447.263	0.0790839	459.378	0.0591472	433.182	0.249135	424.798	0.27706	460.078	0.0324056	441.836	0.392291	461.612	0.373006	440.785	0.0257712	451.602	0.0087676	426.791	0.0651357	452.656	0.0328976	443.531	0.0686055	449.859	0.0601383	471.072	0.00475396	451.972	0.0761701	433.387	0.179487	447.288	0.492132	433.188	0.0501532	443.203	0.037063	431.193	0.0471856	433.182	0.249135	433.188	0.0501532	443.203	0.037063	434.07	0.0126078
422.62	0.0318176	447.546	0.0753741	459.662	0.056264	433.469	0.240682	425.086	0.267563	460.357	0.0306495	442.122	0.382458	461.868	0.373564	441.081	0.0243842	451.9	0.00840761	427.075	0.0625172	452.951	0.0315301	443.832	0.065795	450.162	0.0577343	471.355	0.00446162	452.26	0.0727261	433.676	0.173372	447.553	0.485914	433.498	0.0477577	443.506	0.0354341	431.482	0.045177	433.469	0.240682	433.498	0.0477577	443.506	0.0354341	434.374	0.0122192
422.92	0.0301944	447.83	0.0718101	459.946	0.0534961	433.756	0.232417	425.374	0.258273	460.636	0.0289751	442.407	0.37273	462.125	0.37408	441.377	0.023066	452.198	0.00806734	427.358	0.0599923	453.246	0.0302249	444.132	0.063079	450.464	0.0554081	471.638	0.0041855	452.548	0.0694052	433.964	0.167418	447.817	0.47967	433.809	0.045451	443.809	0.0338585	431.771	0.0432453	433.756	0.232417	433.809	0.045451	443.809	0.0338585	434.677	0.0118504
423.22	0.0286429	448.113	0.0683879	460.23	0.0508402	434.044	0.224339	425.662	0.249191	460.915	0.0273796	442.692	0.363109	462.382	0.374549	441.673	0.0218136	452.495	0.00774566	427.642	0.0575587	453.541	0.0289796	444.433	0.0604557	450.767	0.0531589	471.921	0.00392483	452.836	0.0662049	434.253	0.161622	448.082	0.473401	434.119	0.0432315	444.112	0.0323354	432.061	0.0413881	434.044	0.224339	434.119	0.0432315	444.112	0.0323354	434.981	0.0115001
423.52	0.0271606	448.396	0.0651034	460.513	0.0482933	434.331	0.216448	425.95	0.240318	461.193	0.02586	442.978	0.353601	462.639	0.374968	441.97	0.0206245	452.793	0.00744146	427.926	0.0552137	453.836	0.0277918	444.733	0.0579231	451.069	0.0509862	472.204	0.00367886	453.124	0.0631224	434.541	0.155986	448.347	0.467108	434.43	0.0410971	444.415	0.0308642	432.35	0.0396031	434.331	0.216448	434.43	0.0410971	444.415	0.0308642	435.284	0.0111672
423.82	0.0257452	448.68	0.0619527	460.797	0.0458523	434.618	0.208744	426.238	0.231655	461.472	0.0244135	443.263	0.344209	462.896	0.375332	442.266	0.0194958	453.091	0.00715372	428.209	0.0529547	454.132	0.0266591	445.034	0.0554793	451.372	0.0488891	472.487	0.00344689	453.412	0.0601552	434.83	0.150506	448.612	0.460792	434.74	0.0390462	444.718	0.0294441	432.64	0.0378879	434.618	0.208744	434.74	0.0390462	444.718	0.0294441	435.588	0.0108504
424.12	0.0243942	448.963	0.0589317	461.081	0.043514	434.906	0.201228	426.526	0.223201	461.751	0.0230373	443.548	0.334936	463.153	0.375636	442.562	0.018425	453.389	0.00688144	428.493	0.0507794	454.427	0.025579	445.334	0.0531224	451.674	0.0468667	472.77	0.00322824	453.7	0.0573003	435.118	0.145183	448.876	0.454454	435.051	0.0370766	445.021	0.0280743	432.929	0.0362404	434.906	0.201228	435.051	0.0370766	445.021	0.0280743	435.891	0.0105488
424.42	0.0231054	449.247	0.0560365	461.364	0.0412754	435.193	0.193897	426.814	0.214957	462.029	0.0217286	443.834	0.325786	463.409	0.375877	442.858	0.0174096	453.686	0.00662369	428.777	0.0486851	454.722	0.0245494	445.635	0.0508505	451.976	0.044918	473.053	0.00302223	453.988	0.0545552	435.407	0.140015	449.141	0.448095	435.361	0.0351866	445.324	0.0267538	433.219	0.0346582	435.193	0.193897	435.361	0.0351866	445.324	0.0267538	436.195	0.0102612
424.719	0.0218766	449.53	0.0532633	461.648	0.0391334	435.48	0.186753	427.102	0.206921	462.308	0.0204848	444.119	0.316761	463.666	0.376051	443.155	0.0164471	453.984	0.00637956	429.061	0.0466695	455.017	0.023568	445.936	0.0486614	452.279	0.0430421	473.336	0.00282824	454.276	0.051917	435.696	0.135	449.406	0.441717	435.672	0.0333741	445.628	0.0254817	433.508	0.0331391	435.48	0.186753	435.672	0.0333741	445.628	0.0254817	436.498	0.00998671
425.019	0.0207054	449.814	0.050608	461.932	0.0370849	435.768	0.179794	427.389	0.199095	462.587	0.0193033	444.404	0.307865	463.923	0.376154	443.451	0.0155352	454.282	0.00614822	429.344	0.0447301	455.312	0.0226326	446.236	0.0465531	452.581	0.0412377	473.62	0.00264566	454.564	0.049383	435.984	0.130137	449.671	0.435322	435.982	0.0316371	445.931	0.0242572	433.797	0.0316811	435.768	0.179794	435.982	0.0316371	445.931	0.0242572	436.802	0.00972438
425.319	0.0195897	450.097	0.048067	462.215	0.0351271	436.055	0.173018	427.677	0.191475	462.866	0.0181816	444.689	0.299101	464.18	0.376183	443.747	0.0146715	454.58	0.00592885	429.628	0.0428645	455.607	0.0217412	446.537	0.0445237	452.884	0.0395038	473.903	0.00247389	454.852	0.0469504	436.273	0.125423	449.935	0.42891	436.293	0.0299735	446.234	0.0230792	434.087	0.0302821	436.055	0.173018	436.293	0.0299735	446.234	0.0230792	437.105	0.00947335
425.619	0.0185274	450.381	0.0456365	462.499	0.0332568	436.342	0.166425	427.965	0.184062	463.144	0.0171171	444.975	0.29047	464.437	0.376133	444.043	0.0138538	454.877	0.0057207	429.912	0.0410704	455.903	0.0208916	446.837	0.042571	453.186	0.037839	474.186	0.00231239	455.14	0.0446165	436.561	0.120858	450.2	0.422485	436.603	0.0283815	446.537	0.0219467	434.376	0.0289399	436.342	0.166425	436.603	0.0283815	446.537	0.0219467	437.409	0.00923279
425.919	0.0175164	450.664	0.0433126	462.783	0.0314711	436.629	0.160013	428.253	0.176854	463.423	0.0161075	445.26	0.281976	464.693	0.376002	444.339	0.01308	455.175	0.00552304	430.195	0.0393454	456.198	0.0200821	447.138	0.040693	453.489	0.0362421	474.469	0.0021606	455.428	0.0423784	436.85	0.116438	450.465	0.416046	436.914	0.0268588	446.84	0.0208587	434.666	0.0276526	436.629	0.160013	436.914	0.0268588	446.84	0.0208587	437.712	0.00900194
426.219	0.0165546	450.948	0.0410919	463.067	0.0297672	436.917	0.15378	428.541	0.16985	463.702	0.0151504	445.545	0.273621	464.95	0.375788	444.636	0.012348	455.473	0.0053352	430.479	0.0376874	456.493	0.0193105	447.438	0.0388875	453.791	0.0347117	474.752	0.00201802	455.716	0.0402334	437.138	0.112162	450.73	0.409597	437.224	0.0254034	447.143	0.0198142	434.955	0.0264182	436.917	0.15378	437.224	0.0254034	447.143	0.0198142	438.016	0.00878007
426.519	0.0156401	451.231	0.0389706	463.35	0.0281421	437.204	0.147725	428.829	0.163047	463.981	0.0142436	445.831	0.265406	465.207	0.375486	444.932	0.0116557	455.771	0.00515654	430.763	0.036094	456.788	0.0185752	447.739	0.0371526	454.094	0.0332464	475.035	0.00188414	456.004	0.0381787	437.427	0.108028	450.994	0.403138	437.535	0.0240133	447.446	0.018812	435.245	0.0252348	437.204	0.147725	437.535	0.0240133	447.446	0.018812	438.319	0.00856651
426.818	0.0147709	451.515	0.0369453	463.634	0.0265932	437.491	0.141846	429.117	0.156444	464.259	0.0133849	446.116	0.257334	465.464	0.375094	445.228	0.0110014	456.068	0.00498644	431.047	0.0345632	457.083	0.0178742	448.039	0.0354862	454.396	0.0318448	475.318	0.00175851	456.291	0.0362117	437.715	0.104033	451.259	0.396673	437.845	0.0226865	447.749	0.0178511	435.534	0.0241005	437.491	0.141846	437.845	0.0226865	447.749	0.0178511	438.623	0.00836062
427.118	0.0139452	451.798	0.0350125	463.918	0.0251175	437.779	0.136141	429.405	0.150039	464.538	0.0125721	446.401	0.249406	465.721	0.37461	445.524	0.010383	456.366	0.00482435	431.33	0.0330926	457.378	0.017206	448.34	0.0338861	454.699	0.0305054	475.601	0.00164066	456.579	0.0343296	438.004	0.100175	451.524	0.390203	438.156	0.0214209	448.052	0.0169303	435.824	0.0230136	437.779	0.136141	438.156	0.0214209	448.052	0.0169303	438.926	0.00816183
427.418	0.0131611	452.082	0.0331687	464.201	0.0237125	438.066	0.130607	429.693	0.143829	464.817	0.0118032	446.687	0.241624	465.977	0.374032	445.821	0.00979881	456.664	0.00466973	431.614	0.0316804	457.674	0.0165688	448.64	0.0323505	455.001	0.0292268	475.884	0.00153016	456.867	0.0325298	438.292	0.0964502	451.789	0.38373	438.467	0.0202144	448.356	0.0160487	436.113	0.0219722	438.066	0.130607	438.467	0.0202144	448.356	0.0160487	439.23	0.00796958
427.718	0.0124168	452.365	0.0314108	464.485	0.0223754	438.353	0.125243	429.981	0.137811	465.096	0.0110762	446.972	0.233988	466.234	0.373357	446.117	0.00924713	456.962	0.00452207	431.898	0.0303243	457.969	0.015961	448.941	0.0308772	455.304	0.0280073	476.167	0.00142662	457.155	0.0308095	438.581	0.0928573	452.053	0.377256	438.777	0.0190652	448.659	0.015205	436.402	0.0209747	438.353	0.125243	438.777	0.0190652	448.659	0.015205	439.533	0.00778336
428.018	0.0117107	452.649	0.0297353	464.769	0.0211037	438.641	0.120046	430.269	0.131984	465.374	0.0103892	447.257	0.226501	466.491	0.372583	446.413	0.00872627	457.259	0.00438091	432.181	0.0290225	458.264	0.0153812	449.241	0.0294642	455.606	0.0268455	476.45	0.00132962	457.443	0.0291663	438.869	0.0893932	452.318	0.370784	439.088	0.0179711	448.962	0.0143982	436.692	0.0200193	438.641	0.120046	439.088	0.0179711	448.962	0.0143982	439.837	0.00760271
428.318	0.011041	452.932	0.0281393	465.052	0.0198948	438.928	0.115013	430.557	0.126344	465.653	0.00974028	447.542	0.219163	466.748	0.371709	446.709	0.00823466	457.557	0.00424581	432.465	0.027773	458.559	0.0148279	449.542	0.0281097	455.908	0.0257398	476.733	0.0012388	457.731	0.0275974	439.158	0.0860552	452.583	0.364317	439.398	0.0169302	449.265	0.0136271	436.981	0.0191045	438.928	0.115013	439.398	0.0169302	449.265	0.0136271	440.14	0.00742719
428.618	0.0104062	453.216	0.0266194	465.336	0.0187462	439.215	0.110142	430.845	0.120889	465.932	0.00912765	447.828	0.211974	467.005	0.370733	447.006	0.00777078	457.855	0.00411635	432.749	0.0265738	458.854	0.0142996	449.842	0.0268116	456.211	0.0246886	477.016	0.00115381	458.019	0.0261003	439.446	0.0828403	452.848	0.357855	439.709	0.0159406	449.568	0.0128906	437.271	0.0182287	439.215	0.110142	439.709	0.0159406	449.568	0.0128906	440.444	0.0072564
428.917	0.00980468	453.499	0.0251729	465.62	0.0176555	439.502	0.10543	431.132	0.115615	466.211	0.00854958	448.113	0.204936	467.261	0.369654	447.302	0.00733317	458.153	0.00399216	433.033	0.0254232	459.15	0.013795	450.143	0.025568	456.513	0.0236903	477.3	0.0010743	458.307	0.0246726	439.735	0.0797458	453.112	0.351402	440.019	0.0150004	449.871	0.0121876	437.56	0.0173904	439.502	0.10543	440.019	0.0150004	449.871	0.0121876	440.747	0.00708998
429.217	0.00923492	453.783	0.0237966	465.903	0.0166204	439.79	0.100875	431.42	0.110519	466.489	0.00800442	448.398	0.198049	467.518	0.368471	447.598	0.00692044	458.45	0.00387287	433.316	0.0243194	459.445	0.013313	450.444	0.0243771	456.816	0.0227434	477.583	0.000999959	458.595	0.0233117	440.023	0.0767688	453.377	0.344961	440.33	0.0141076	450.174	0.0115171	437.85	0.0165881	439.79	0.100875	440.33	0.0141076	450.174	0.0115171	441.051	0.00692758
429.517	0.00869546	454.066	0.0224878	466.187	0.0156385	440.077	0.096473	431.708	0.105599	466.768	0.00749053	448.684	0.191314	467.775	0.367183	447.894	0.00653126	458.748	0.00375816	433.6	0.0232606	459.74	0.0128521	450.744	0.023237	457.118	0.0218461	477.866	0.000930476	458.883	0.0220153	440.312	0.0739063	453.642	0.338533	440.64	0.0132605	450.477	0.0108779	438.139	0.0158204	440.077	0.096473	440.64	0.0132605	450.477	0.0108779	441.354	0.00676891
429.817	0.00818491	454.35	0.0212437	466.471	0.0147076	440.364	0.0922219	431.996	0.10085	467.047	0.00700639	448.969	0.184729	468.032	0.365788	448.19	0.00616436	459.046	0.0036477	433.884	0.0222451	460.035	0.0124113	451.045	0.0221458	457.421	0.0209969	478.149	0.000865562	459.171	0.0207809	440.6	0.0711552	453.906	0.332122	440.951	0.0124572	450.78	0.010269	438.428	0.0150859	440.364	0.0922219	440.951	0.0124572	450.78	0.010269	441.658	0.00661367
430.117	0.0077019	454.633	0.0200616	466.755	0.0138255	440.652	0.0881183	432.284	0.0962694	467.326	0.00655049	449.254	0.178296	468.289	0.364288	448.487	0.00581852	459.344	0.00354123	434.168	0.0212713	460.33	0.0119894	451.345	0.0211019	457.723	0.0201943	478.432	0.000804944	459.459	0.0196063	440.889	0.0685127	454.171	0.325729	441.261	0.011696	451.084	0.0096892	438.718	0.0143832	440.652	0.0881183	441.261	0.011696	451.084	0.0096892	441.961	0.00646162
430.417	0.00724513	454.916	0.0189388	467.038	0.0129901	440.939	0.0841595	432.572	0.0918537	467.604	0.00612142	449.54	0.172014	468.545	0.36268	448.783	0.00549258	459.641	0.00343847	434.451	0.0203376	460.625	0.0115855	451.646	0.0201034	458.026	0.0194366	478.715	0.000748359	459.747	0.0184891	441.177	0.0659758	454.436	0.319358	441.572	0.0109751	451.387	0.00913755	439.007	0.0137112	440.939	0.0841595	441.572	0.0109751	451.387	0.00913755	442.265	0.00631252
430.717	0.00681334	455.2	0.0178728	467.322	0.0121994	441.226	0.0803421	432.86	0.0875993	467.883	0.00571779	449.825	0.165882	468.802	0.360966	449.079	0.00518545	459.939	0.00333918	434.735	0.0194425	460.921	0.0111985	451.946	0.0191486	458.328	0.0187221	478.998	0.000695562	460.035	0.0174271	441.466	0.0635413	454.701	0.31301	441.882	0.0102928	451.69	0.00861299	439.297	0.0130685	441.226	0.0803421	441.882	0.0102928	451.69	0.00861299	442.568	0.00616618
431.016	0.00640532	455.483	0.0168612	467.606	0.0114514	441.514	0.0766633	433.148	0.0835026	468.162	0.00533829	450.11	0.159901	469.059	0.359145	449.375	0.00489607	460.237	0.00324312	435.019	0.0185845	461.216	0.0108274	452.247	0.018236	458.631	0.0180495	479.281	0.000646319	460.323	0.0164182	441.755	0.0612062	454.965	0.306689	442.193	0.00964751	451.993	0.0081145	439.586	0.012454	441.514	0.0766633	442.193	0.00964751	451.993	0.0081145	442.872	0.00602241
431.316	0.0060199	455.767	0.0159016	467.889	0.0107441	441.801	0.0731197	433.436	0.0795599	468.441	0.00498167	450.396	0.154069	469.316	0.357217	449.672	0.00462344	460.535	0.0031501	435.302	0.0177621	461.511	0.0104714	452.547	0.0173638	458.933	0.017417	479.564	0.000600409	460.611	0.0154601	442.043	0.0589676	455.23	0.300398	442.503	0.00903756	452.296	0.00764106	439.876	0.0118665	441.801	0.0731197	442.503	0.00903756	452.296	0.00764106	443.175	0.00588104
431.616	0.00565597	456.05	0.0149917	468.173	0.0100757	442.088	0.0697083	433.724	0.0757676	468.719	0.00464671	450.681	0.148386	469.573	0.355184	449.968	0.0043666	460.832	0.00305993	435.586	0.0169739	461.806	0.0101296	452.848	0.0165306	459.236	0.0168232	479.847	0.000557623	460.899	0.0145509	442.332	0.0568224	455.495	0.294138	442.814	0.0084614	452.599	0.0071917	440.165	0.0113049	442.088	0.0697083	442.814	0.0084614	452.599	0.0071917	443.479	0.00574193
431.916	0.00531245	456.334	0.0141292	468.457	0.00944433	442.375	0.0664258	434.012	0.072122	468.998	0.00433225	450.966	0.142852	469.829	0.353045	450.264	0.00412467	461.13	0.00297241	435.87	0.0162186	462.101	0.00980123	453.148	0.0157347	459.538	0.0162664	480.13	0.000517764	461.187	0.0136885	442.62	0.0547676	455.76	0.287912	443.124	0.00791751	452.902	0.00676544	440.454	0.0107681	442.375	0.0664258	443.124	0.00791751	452.902	0.00676544	443.782	0.00560495
432.216	0.00498832	456.617	0.013312	468.74	0.00884831	442.663	0.063269	434.3	0.0686193	469.277	0.0040372	451.251	0.137464	470.086	0.350802	450.56	0.00389678	461.428	0.0028874	436.154	0.015495	462.396	0.0094855	453.449	0.0149747	459.84	0.0157453	480.413	0.000480645	461.475	0.012871	442.909	0.0528001	456.024	0.281724	443.435	0.0074044	453.205	0.00636135	440.744	0.0102551	442.663	0.063269	443.435	0.0074044	453.205	0.00636135	444.086	0.00547
432.516	0.00468259	456.901	0.012538	469.024	0.00828596	442.95	0.0602348	434.588	0.0652558	469.556	0.00376049	451.537	0.132221	470.343	0.348455	450.857	0.00368211	461.726	0.00280475	436.437	0.0148016	462.692	0.00918171	453.749	0.0142491	460.143	0.0152583	480.696	0.000446091	461.763	0.0120964	443.197	0.0509171	456.289	0.275574	443.745	0.00692065	453.508	0.0059785	441.033	0.00976491	442.95	0.0602348	443.745	0.00692065	453.508	0.0059785	444.389	0.00533697
432.816	0.00439431	457.184	0.0118052	469.308	0.00775564	443.237	0.0573198	434.876	0.0620277	469.834	0.00350111	451.822	0.127124	470.6	0.346005	451.153	0.00347991	462.023	0.00272432	436.721	0.0141374	462.987	0.0088892	454.05	0.0135565	460.445	0.0148038	480.979	0.000413937	462.051	0.0113628	443.486	0.0491155	456.554	0.269467	444.056	0.00646487	453.812	0.005616	441.323	0.00929657	443.237	0.0573198	444.056	0.00646487	453.812	0.005616	444.693	0.00520579
433.115	0.00412259	457.468	0.0111118	469.592	0.00725579	443.525	0.054521	435.163	0.0589314	470.113	0.00325811	452.107	0.122169	470.857	0.343455	451.449	0.00328943	462.321	0.002646	437.005	0.0135012	463.282	0.00860732	454.35	0.0128957	460.748	0.0143806	481.263	0.000384025	462.339	0.0106686	443.774	0.0473925	456.819	0.263404	444.366	0.0060357	454.115	0.00527295	441.612	0.00884916	443.525	0.054521	444.366	0.0060357	454.115	0.00527295	444.996	0.00507638
433.415	0.00386657	457.751	0.0104557	469.875	0.00678491	443.812	0.051835	435.451	0.0559631	470.392	0.00303056	452.393	0.117356	471.113	0.340805	451.745	0.00310999	462.619	0.00256966	437.288	0.0128919	463.577	0.00833548	454.651	0.0122651	461.05	0.0139872	481.546	0.000356209	462.627	0.0100118	444.063	0.0457452	457.083	0.257388	444.677	0.00563185	454.418	0.00494852	441.902	0.0084218	443.812	0.051835	444.677	0.00563185	454.418	0.00494852	445.3	0.0049487
433.715	0.00362541	458.035	0.00983537	470.159	0.00634156	444.099	0.0492588	435.739	0.0531191	470.671	0.00281759	452.678	0.112683	471.37	0.338058	452.041	0.00294093	462.917	0.00249521	437.572	0.0123083	463.872	0.00807315	454.952	0.0116636	461.353	0.0136221	481.829	0.000330351	462.915	0.00939091	444.351	0.0441706	457.348	0.251421	444.987	0.00525207	454.721	0.00464187	442.191	0.00801364	444.099	0.0492588	444.987	0.00525207	454.721	0.00464187	445.603	0.00482269
434.015	0.00339833	458.318	0.00924894	470.443	0.00592435	444.387	0.046789	436.027	0.0503955	470.949	0.00261837	452.963	0.108149	471.627	0.335214	452.338	0.00278164	463.214	0.00242256	437.856	0.0117494	464.168	0.00781978	455.252	0.01109	461.655	0.013284	482.112	0.00030632	463.203	0.0088042	444.64	0.042666	457.613	0.245507	445.298	0.00489515	455.024	0.0043522	442.48	0.00762387	444.387	0.046789	445.298	0.00489515	455.024	0.0043522	445.907	0.00469833
434.315	0.00318458	458.602	0.00869479	470.726	0.00553194	444.674	0.0444226	436.315	0.0477889	471.228	0.00243209	453.249	0.103751	471.884	0.332277	452.634	0.00263154	463.512	0.00235162	438.14	0.0112142	464.463	0.00757491	455.553	0.0105431	461.958	0.0129716	482.395	0.000283995	463.491	0.00825011	444.928	0.0412287	457.878	0.239646	445.608	0.00455993	455.327	0.00407872	442.77	0.00725171	444.674	0.0444226	445.608	0.00455993	455.327	0.00407872	446.21	0.00457558
434.615	0.00298343	458.885	0.00817135	471.01	0.00516305	444.961	0.0421564	436.603	0.0452955	471.507	0.00225802	453.534	0.0994874	472.141	0.329248	452.93	0.00249007	463.81	0.00228233	438.423	0.0107019	464.758	0.00733807	455.853	0.0100216	462.26	0.0126835	482.678	0.000263261	463.779	0.0077271	445.217	0.0398558	458.142	0.233841	445.919	0.00424527	455.63	0.00382067	443.059	0.0068964	444.961	0.0421564	445.919	0.00424527	455.63	0.00382067	446.514	0.00445442
434.915	0.00279422	459.169	0.00767708	471.294	0.00481645	445.249	0.0399874	436.891	0.0429118	471.785	0.00209543	453.819	0.0953569	472.397	0.326129	453.226	0.00235672	464.108	0.00221461	438.707	0.0102113	465.053	0.00710884	456.154	0.00952453	462.563	0.0124186	482.961	0.00024401	464.067	0.00723369	445.505	0.0385449	458.407	0.228095	446.23	0.00395012	455.933	0.00357734	443.349	0.00655724	445.249	0.0399874	446.23	0.00395012	455.933	0.00357734	446.817	0.00433484
435.214	0.00261628	459.452	0.00721054	471.577	0.00449097	445.536	0.0379124	437.179	0.040634	472.064	0.00194363	454.105	0.091357	472.654	0.322923	453.523	0.002231	464.405	0.00214841	438.991	0.00974171	465.348	0.00688684	456.454	0.0090508	462.865	0.0121754	483.244	0.000226141	464.355	0.00676847	445.794	0.0372931	458.672	0.22241	446.54	0.00367342	456.236	0.003348	443.638	0.00623352	445.536	0.0379124	446.54	0.00367342	456.236	0.003348	447.121	0.00421684
435.514	0.002449	459.736	0.00677033	471.861	0.00418548	445.823	0.0359284	437.467	0.0384588	472.343	0.001802	454.39	0.0874858	472.911	0.319632	453.819	0.00211244	464.703	0.00208368	439.274	0.00929219	465.643	0.00667169	456.755	0.00859938	463.168	0.0119529	483.527	0.000209559	464.643	0.00633006	446.082	0.0360981	458.937	0.216787	446.851	0.00341419	456.54	0.00313198	443.928	0.00592458	445.823	0.0359284	446.851	0.00341419	456.54	0.00313198	447.424	0.00410042
435.814	0.00229179	460.019	0.0063551	472.145	0.0038989	446.11	0.0340324	437.755	0.0363827	472.622	0.0016699	454.675	0.0837411	473.168	0.31626	454.115	0.00200061	465.001	0.00202035	439.558	0.00886195	465.939	0.00646305	457.055	0.00816929	463.47	0.0117498	483.81	0.000194175	464.931	0.00591714	446.371	0.0349572	459.201	0.211229	447.161	0.00317148	456.843	0.00292862	444.217	0.0056298	446.11	0.0340324	447.161	0.00317148	456.843	0.00292862	447.728	0.00398559
436.114	0.00214408	460.303	0.00596357	472.428	0.00363021	446.398	0.0322215	438.043	0.0344021	472.9	0.00154676	454.96	0.0801206	473.425	0.312808	454.411	0.00189511	465.299	0.00195841	439.842	0.00845018	466.234	0.00626061	457.356	0.00775957	463.772	0.0115649	484.093	0.000179907	465.219	0.00552843	446.659	0.033868	459.466	0.205738	447.472	0.00294437	457.146	0.00273727	444.506	0.00534855	446.398	0.0322215	447.472	0.00294437	457.146	0.00273727	448.031	0.00387234
436.414	0.00200535	460.586	0.00559453	472.712	0.00337841	446.685	0.0304927	438.331	0.0325138	473.179	0.00143204	455.246	0.076622	473.681	0.30928	454.708	0.00179555	465.596	0.0018978	440.126	0.00805614	466.529	0.00606407	457.656	0.0073693	464.075	0.0113972	484.376	0.000166676	465.507	0.00516272	446.948	0.0328282	459.731	0.200316	447.782	0.002732	457.449	0.00255734	444.796	0.00508027	446.685	0.0304927	447.782	0.002732	457.449	0.00255734	448.335	0.0037607
436.714	0.00187508	460.869	0.0052468	472.996	0.00314257	446.972	0.0288433	438.619	0.0307144	473.458	0.0013252	455.531	0.0732432	473.938	0.305678	455.004	0.00170157	465.894	0.00183849	440.409	0.00767909	466.824	0.00587318	457.957	0.00699763	464.377	0.0112456	484.659	0.00015441	465.795	0.00481882	447.236	0.0318355	459.996	0.194963	448.093	0.00253353	457.752	0.00238822	445.085	0.00482438	446.972	0.0288433	448.093	0.00253353	457.752	0.00238822	448.638	0.00365067
437.014	0.00175281	461.153	0.00491926	473.28	0.00292179	447.26	0.0272703	438.906	0.0290007	473.737	0.00122577	455.816	0.0699816	474.195	0.302006	455.3	0.00161283	466.192	0.00178046	440.693	0.00731835	467.119	0.00568766	458.257	0.0066437	464.68	0.011109	484.943	0.000143041	466.083	0.00449561	447.525	0.0308875	460.26	0.189683	448.403	0.00234816	458.055	0.00222937	445.375	0.00458035	447.26	0.0272703	448.403	0.00234816	458.055	0.00222937	448.942	0.00354229
437.313	0.00163806	461.436	0.00461085	473.563	0.00271523	447.547	0.025771	439.194	0.0273694	474.015	0.00113326	456.102	0.0668349	474.452	0.298267	455.596	0.00152902	466.49	0.00172368	440.977	0.00697322	467.414	0.0055073	458.558	0.00630671	464.982	0.0109863	485.226	0.000132505	466.371	0.00419201	447.814	0.0299821	460.525	0.184476	448.714	0.00217514	458.358	0.00208023	445.664	0.00434767	447.547	0.025771	448.714	0.00217514	458.358	0.00208023	449.245	0.00343556
437.613	0.00153041	461.72	0.00432054	473.847	0.00252205	447.834	0.0243428	439.482	0.0258175	474.294	0.00104725	456.387	0.0638006	474.709	0.294463	455.892	0.00144983	466.787	0.00166812	441.261	0.00664309	467.71	0.00533188	458.858	0.00598589	465.285	0.0108766	485.509	0.000122743	466.659	0.00390699	448.102	0.0291172	460.79	0.179345	449.024	0.00201375	458.661	0.00194028	445.954	0.00412584	447.834	0.0243428	449.024	0.00201375	458.661	0.00194028	449.549	0.00333051
437.913	0.00142944	462.003	0.00404736	474.131	0.0023415	448.122	0.022983	439.77	0.0243419	474.573	0.000967307	456.672	0.0608763	474.965	0.290599	456.189	0.00137499	467.085	0.00161377	441.544	0.00632732	468.005	0.0051612	459.159	0.00568049	465.587	0.010779	485.792	0.000113699	466.947	0.00363955	448.391	0.0282908	461.055	0.17429	449.335	0.00186329	458.964	0.00180904	446.243	0.00391439	448.122	0.022983	449.335	0.00186329	458.964	0.00180904	449.852	0.00322716
438.213	0.00133478	462.287	0.00379038	474.414	0.00217282	448.409	0.0216889	440.058	0.0229396	474.852	0.000893052	456.958	0.0580595	475.222	0.286678	456.485	0.00130423	467.383	0.0015606	441.828	0.00602534	468.3	0.00499509	459.46	0.00538982	465.89	0.0106924	486.075	0.000105323	467.235	0.00338874	448.679	0.0275008	461.319	0.169313	449.645	0.00172312	459.268	0.00168601	446.532	0.00371288	448.409	0.0216889	449.645	0.00172312	459.268	0.00168601	450.156	0.00312553
438.513	0.00124605	462.57	0.00354873	474.698	0.00201533	448.696	0.0204581	440.346	0.0216076	475.13	0.000824111	457.243	0.0553476	475.479	0.282702	456.781	0.00123731	467.681	0.00150861	442.112	0.00573656	468.595	0.00483337	459.76	0.00511318	466.192	0.010616	486.358	9.7565e-05	467.523	0.00315365	448.968	0.0267453	461.584	0.164415	449.956	0.0015926	459.571	0.00157076	446.822	0.00352086	448.696	0.0204581	449.956	0.0015926	459.571	0.00157076	450.459	0.00302564
438.813	0.0011629	462.854	0.00332156	474.982	0.00186836	448.983	0.019288	440.634	0.0203432	475.409	0.000760137	457.528	0.0527382	475.736	0.278675	457.077	0.001174	467.979	0.00145777	442.395	0.00546045	468.89	0.00467589	460.061	0.00484993	466.495	0.010549	486.641	9.03814e-05	467.811	0.00293342	449.256	0.0260224	461.849	0.159597	450.266	0.00147115	459.874	0.00146283	447.111	0.00333792	448.983	0.019288	450.266	0.00147115	459.874	0.00146283	450.763	0.00292752
439.113	0.00108501	463.137	0.00310807	475.265	0.00173128	449.271	0.0181763	440.922	0.0191435	475.688	0.000700801	457.813	0.0502287	475.993	0.274602	457.374	0.00111408	468.276	0.00140808	442.679	0.00519649	469.186	0.00452251	460.361	0.00459946	466.797	0.0104904	486.924	8.373e-05	468.099	0.00272722	449.545	0.0253305	462.114	0.154861	450.577	0.00135821	460.177	0.00136182	447.401	0.00316367	449.271	0.0181763	450.577	0.00135821	460.177	0.00136182	451.066	0.00283119
439.412	0.00101206	463.421	0.0029075	475.549	0.00160348	449.558	0.0171206	441.21	0.0180059	475.967	0.000645793	458.099	0.0478165	476.249	0.270484	457.67	0.00105735	468.574	0.00135952	442.963	0.00494417	469.481	0.0043731	460.662	0.00436116	467.1	0.0104396	487.207	7.75721e-05	468.387	0.00253425	449.833	0.0246677	462.378	0.150207	450.887	0.00125324	460.48	0.00126733	447.69	0.00299773	449.558	0.0171206	450.887	0.00125324	460.48	0.00126733	451.37	0.00273667
439.712	0.000943751	463.704	0.00271913	475.833	0.0014844	449.845	0.0161185	441.498	0.0169277	476.245	0.000594825	458.384	0.0454991	476.506	0.266327	457.966	0.00100362	468.872	0.00131208	443.247	0.00470302	469.776	0.00422755	460.962	0.00413447	467.402	0.0103957	487.49	7.18714e-05	468.675	0.00235378	450.122	0.0240325	462.643	0.145637	451.198	0.00115574	460.783	0.00117898	447.98	0.00283972	449.845	0.0161185	451.198	0.00115574	460.783	0.00117898	451.673	0.00264397
440.012	0.000879815	463.988	0.00254227	476.117	0.00137351	450.133	0.015168	441.786	0.0159064	476.524	0.000547623	458.669	0.0432741	476.763	0.262133	458.262	0.000952711	469.17	0.00126576	443.53	0.00447257	470.071	0.00408573	461.263	0.00391885	467.704	0.010358	487.773	6.65943e-05	468.963	0.00218507	450.41	0.0234232	462.908	0.14115	451.508	0.00106524	461.086	0.00109641	448.269	0.0026893	450.133	0.015168	451.508	0.00106524	461.086	0.00109641	451.977	0.00255312
440.312	0.000819985	464.271	0.00237627	476.4	0.00127029	450.42	0.0142667	442.074	0.0149395	476.803	0.00050393	458.955	0.0411387	477.02	0.257905	458.558	0.000904464	469.467	0.00122053	443.814	0.00425239	470.366	0.00394754	461.563	0.00371377	468.007	0.0103257	488.056	6.17096e-05	469.251	0.00202745	450.699	0.0228383	463.173	0.136748	451.819	0.00098128	461.389	0.00101929	448.558	0.00254614	450.42	0.0142667	451.819	0.00098128	461.389	0.00101929	452.28	0.00246414
440.612	0.000764012	464.555	0.00222051	476.684	0.00117426	450.707	0.0134127	442.362	0.0140245	477.082	0.000463506	459.24	0.0390905	477.277	0.253649	458.855	0.00085872	469.765	0.00117641	444.098	0.00404204	470.661	0.0038129	461.864	0.00351876	468.309	0.0102983	488.339	5.71882e-05	469.539	0.00188026	450.987	0.0222765	463.437	0.132431	452.129	0.000903437	461.693	0.00094728	448.848	0.00240991	450.707	0.0134127	452.129	0.000903437	461.693	0.00094728	452.584	0.00237704
440.912	0.000711662	464.838	0.0020744	476.968	0.00108497	450.995	0.0126037	442.65	0.0131592	477.36	0.000426125	459.525	0.037127	477.533	0.249366	459.151	0.000815335	470.063	0.00113337	444.381	0.00384113	470.957	0.00368172	462.164	0.00333332	468.612	0.010275	488.622	5.30032e-05	469.827	0.00174289	451.276	0.0217362	463.702	0.1282	452.44	0.00083131	461.996	0.000880082	449.137	0.0022803	450.995	0.0126037	452.44	0.00083131	461.996	0.000880082	452.887	0.00229182
441.212	0.000662714	465.122	0.00193738	477.251	0.00100198	451.282	0.011838	442.937	0.0123413	477.639	0.000391575	459.811	0.0352457	477.79	0.24506	459.447	0.000774174	470.361	0.0010914	444.665	0.00364927	471.252	0.00355391	462.465	0.00315702	468.914	0.0102552	488.906	4.91296e-05	470.115	0.00161476	451.564	0.0212162	463.967	0.124055	452.75	0.000764519	462.299	0.000817401	449.427	0.00215704	451.282	0.011838	452.75	0.000764519	462.299	0.000817401	453.191	0.00220851
441.512	0.000616959	465.405	0.00180893	477.535	0.0009249	451.569	0.0111134	443.225	0.0115686	477.918	0.000359658	460.096	0.0334441	478.047	0.240736	459.743	0.00073511	470.658	0.00105051	444.949	0.00346607	471.547	0.0034294	462.765	0.00298943	469.217	0.0102384	489.189	4.55441e-05	470.403	0.0014953	451.853	0.0207152	464.232	0.119996	453.061	0.000702706	462.602	0.000758959	449.716	0.00203982	451.569	0.0111134	453.061	0.000702706	462.602	0.000758959	453.494	0.00212712
441.811	0.000574201	465.689	0.00168855	477.819	0.000853337	451.856	0.0104283	443.513	0.0108391	478.197	0.000330187	460.381	0.0317197	478.304	0.236396	460.04	0.000698024	470.956	0.00101067	445.233	0.00329119	471.842	0.00330813	463.066	0.00283013	469.519	0.010224	489.472	4.22253e-05	470.691	0.00138399	452.141	0.0202321	464.496	0.116024	453.372	0.000645534	462.905	0.000704493	450.006	0.00192838	451.856	0.0104283	453.372	0.000645534	462.905	0.000704493	453.798	0.00204764
442.111	0.000534253	465.972	0.00157576	478.102	0.000786932	452.144	0.00978067	443.801	0.0101506	478.475	0.000302989	460.667	0.0300701	478.561	0.232045	460.336	0.000662807	471.254	0.000971887	445.516	0.00312427	472.137	0.00319002	463.366	0.00267873	469.822	0.0102114	489.755	3.91531e-05	470.979	0.00128033	452.43	0.0197657	464.761	0.112139	453.682	0.000592688	463.208	0.000653756	450.295	0.00182247	452.144	0.00978067	453.682	0.000592688	463.208	0.000653756	454.101	0.00197009
442.411	0.000496942	466.256	0.00147012	478.386	0.000725346	452.431	0.00916892	444.089	0.00950122	478.754	0.0002779	460.952	0.028493	478.817	0.227685	460.632	0.000629353	471.552	0.000934146	445.8	0.00296498	472.432	0.00307501	463.667	0.00253486	470.124	0.0102002	490.038	3.63091e-05	471.267	0.00118384	452.718	0.0193149	465.026	0.108341	453.993	0.000543868	463.511	0.000606511	450.584	0.00172182	452.431	0.00916892	453.993	0.000543868	463.511	0.000606511	454.405	0.00189447
442.711	0.000462104	466.539	0.00137119	478.67	0.000668257	452.718	0.00859132	444.377	0.00888905	479.033	0.00025477	461.237	0.0269858	479.074	0.223319	460.928	0.000597566	471.849	0.00089744	446.084	0.00281302	472.728	0.00296305	463.968	0.00239816	470.427	0.0101898	490.321	3.36761e-05	471.555	0.00109408	453.007	0.0188787	465.291	0.104629	454.303	0.000498795	463.814	0.000562537	450.874	0.00162622	452.718	0.00859132	454.303	0.000498795	463.814	0.000562537	454.708	0.00182077
443.011	0.000429582	466.822	0.00127859	478.953	0.000615364	453.006	0.00804626	444.665	0.00831228	479.312	0.000233455	461.522	0.0255463	479.331	0.218952	461.225	0.000567356	472.147	0.000861757	446.367	0.00266807	473.023	0.00285409	464.268	0.0022683	470.729	0.0101799	490.604	3.12383e-05	471.843	0.00101062	453.296	0.0184561	465.555	0.101003	454.614	0.000457206	464.117	0.000521624	451.163	0.00153543	453.006	0.00804626	454.614	0.000457206	464.117	0.000521624	455.012	0.00174901
443.311	0.000399232	467.106	0.00119192	479.237	0.000566385	453.293	0.00753216	444.953	0.00776915	479.59	0.000213823	461.808	0.0241722	479.588	0.214587	461.521	0.000538637	472.445	0.000827088	446.651	0.00252984	473.318	0.00274806	464.569	0.00214496	471.032	0.0101699	490.887	2.8981e-05	472.131	0.00093306	453.584	0.0180463	465.82	0.0974644	454.924	0.000418855	464.421	0.000483573	451.453	0.00144922	453.293	0.00753216	454.924	0.000418855	464.421	0.000483573	455.315	0.00167916
443.611	0.000370916	467.389	0.00111084	479.521	0.000521054	453.58	0.00704754	445.241	0.00725797	479.869	0.000195749	462.093	0.0228612	479.845	0.210226	461.817	0.000511329	472.743	0.000793423	446.935	0.00239804	473.613	0.00264493	464.869	0.00202781	471.334	0.0101595	491.17	2.68906e-05	472.419	0.000861024	453.873	0.0176484	466.085	0.0940114	455.235	0.000383511	464.724	0.000448199	451.742	0.0013674	453.58	0.00704754	455.235	0.000383511	464.724	0.000448199	455.619	0.00161124
443.91	0.000344505	467.673	0.001035	479.805	0.000479119	453.868	0.00659093	445.529	0.00677711	480.148	0.00017912	462.378	0.0216111	480.101	0.205873	462.113	0.000485359	473.04	0.00076075	447.219	0.00227242	473.908	0.00254464	465.17	0.00191658	471.636	0.0101483	491.453	2.49545e-05	472.707	0.000794153	454.161	0.0172616	466.35	0.090644	455.545	0.000350957	465.027	0.000415326	452.032	0.00128976	453.868	0.00659093	455.545	0.000350957	465.027	0.000415326	455.922	0.00154522
444.21	0.000319878	467.956	0.000964079	480.088	0.000440347	454.155	0.00616094	445.817	0.00632502	480.427	0.000163826	462.664	0.0204197	480.358	0.201531	462.409	0.000460656	473.338	0.000729059	447.502	0.00215271	474.203	0.00244715	465.47	0.00181097	471.939	0.010136	491.736	2.31611e-05	472.995	0.000732109	454.45	0.0168852	466.614	0.0873617	455.856	0.00032099	465.33	0.000384787	452.321	0.00121611	454.155	0.00616094	455.856	0.00032099	465.33	0.000384787	456.226	0.0014811
444.51	0.000296921	468.24	0.000897786	480.372	0.000404517	454.442	0.00575624	446.105	0.00590021	480.705	0.000149767	462.949	0.0192848	480.615	0.197204	462.706	0.000437154	473.636	0.000698336	447.786	0.00203867	474.499	0.00235241	465.771	0.00171072	472.241	0.0101222	492.019	2.14997e-05	473.283	0.000674576	454.738	0.0165184	466.879	0.0841641	456.166	0.000293422	465.633	0.000356428	452.61	0.00114627	454.442	0.00575624	456.166	0.000293422	465.633	0.000356428	456.529	0.00141887
444.81	0.000275527	468.523	0.000835831	480.656	0.000371424	454.729	0.00537553	446.393	0.00550124	480.984	0.000136851	463.234	0.0182043	480.872	0.192893	463.002	0.000414793	473.934	0.000668571	448.07	0.00193004	474.794	0.00226038	466.071	0.00161559	472.544	0.0101066	492.302	1.99602e-05	473.571	0.000621253	455.027	0.0161607	467.144	0.0810504	456.477	0.000268075	465.936	0.000330101	452.9	0.00108005	454.729	0.00537553	456.477	0.000268075	465.936	0.000330101	456.833	0.00135851
445.11	0.000255595	468.807	0.000777946	480.939	0.000340873	455.017	0.00501758	446.681	0.00512674	481.263	0.000124989	463.52	0.0171761	481.129	0.188603	463.298	0.000393514	474.231	0.000639749	448.354	0.00182661	475.089	0.00217101	466.372	0.00152531	472.846	0.010089	492.585	1.85335e-05	473.859	0.000571859	455.315	0.0158113	467.409	0.0780201	456.787	0.000244784	466.239	0.000305669	453.189	0.0010173	455.017	0.00501758	456.787	0.000244784	466.239	0.000305669	457.136	0.0013
445.41	0.00023703	469.09	0.000723879	481.223	0.000312684	455.304	0.00468121	446.968	0.00477539	481.541	0.000114103	463.805	0.0161984	481.386	0.184336	463.594	0.000373262	474.529	0.000611857	448.637	0.00172815	475.384	0.00208427	466.672	0.00143967	473.149	0.010069	492.869	1.72111e-05	474.147	0.000526129	455.604	0.0154698	467.673	0.0750723	457.098	0.000223395	466.542	0.000283003	453.479	0.000957844	455.304	0.00468121	457.098	0.000223395	466.542	0.000283003	457.44	0.00124333
445.71	0.000219745	469.374	0.000673392	481.507	0.000286688	455.591	0.00436528	447.256	0.00444595	481.82	0.000104115	464.09	0.0152689	481.642	0.180094	463.891	0.000353988	474.827	0.000584881	448.921	0.00163445	475.679	0.00200011	466.973	0.00135844	473.451	0.0100465	493.152	1.59852e-05	474.435	0.000483813	455.892	0.0151355	467.938	0.0722063	457.408	0.000203764	466.845	0.000261982	453.768	0.000901534	455.591	0.00436528	457.408	0.000203764	466.845	0.000261982	457.743	0.00118847
446.009	0.000203654	469.657	0.00062626	481.79	0.000262726	455.879	0.0040687	447.544	0.0041372	482.099	9.49568e-05	464.376	0.014386	481.899	0.17588	464.187	0.000335642	475.125	0.000558806	449.205	0.0015453	475.975	0.0019185	467.273	0.0012814	473.754	0.0100213	493.435	1.48485e-05	474.722	0.000444679	456.181	0.0148082	468.203	0.0694211	457.719	0.000185757	467.149	0.000242492	454.058	0.000848221	455.879	0.0040687	457.719	0.000185757	467.149	0.000242492	458.047	0.00113541
446.309	0.000188681	469.941	0.000582273	482.074	0.000240651	456.166	0.00379044	447.832	0.00384801	482.378	8.65635e-05	464.661	0.0135476	482.156	0.171698	464.483	0.00031818	475.422	0.000533618	449.488	0.00146051	476.27	0.00183938	467.574	0.00120837	474.056	0.00999305	493.718	1.37943e-05	475.01	0.000408505	456.469	0.0144872	468.468	0.066716	458.029	0.000169249	467.452	0.000224427	454.347	0.000797761	456.166	0.00379044	458.029	0.000169249	467.452	0.000224427	458.35	0.00108412
446.609	0.000174751	470.224	0.000541231	482.358	0.000220324	456.453	0.0035295	448.12	0.00357728	482.656	7.8875e-05	464.946	0.012752	482.413	0.167548	464.779	0.000301559	475.72	0.000509301	449.772	0.0013799	476.565	0.00176272	467.875	0.00113915	474.359	0.0099617	494.001	1.28165e-05	475.298	0.000375085	456.758	0.0141722	468.732	0.0640898	458.34	0.000154125	467.755	0.000207687	454.637	0.00075002	456.453	0.0035295	458.34	0.000154125	467.755	0.000207687	458.654	0.00103457
446.909	0.000161797	470.508	0.000502948	482.642	0.000201616	456.741	0.00328493	448.408	0.00332396	482.935	7.18355e-05	465.231	0.0119973	482.67	0.163435	465.076	0.000285738	476.018	0.000485839	450.056	0.00130327	476.86	0.00168847	468.175	0.00107354	474.661	0.00992707	494.284	1.19092e-05	475.586	0.000344227	457.046	0.0138629	468.997	0.0615416	458.65	0.000140277	468.058	0.000192179	454.926	0.000704865	456.741	0.00328493	458.65	0.000140277	468.058	0.000192179	458.957	0.000986732
447.209	0.000149752	470.791	0.000467247	482.925	0.000184408	457.028	0.00305583	448.696	0.00308706	483.214	6.53935e-05	465.517	0.0112819	482.926	0.159359	465.372	0.00027068	476.316	0.000463216	450.34	0.00123046	477.155	0.0016166	468.476	0.00101139	474.964	0.00988902	494.567	1.10674e-05	475.874	0.00031575	457.335	0.0135588	469.262	0.0590703	458.961	0.000127603	468.361	0.000177816	455.215	0.000662173	457.028	0.00305583	458.961	0.000127603	468.361	0.000177816	459.261	0.000940587
447.509	0.000138558	471.075	0.000433964	483.209	0.000168587	457.315	0.00284133	448.984	0.00286564	483.493	5.95012e-05	465.802	0.0106041	483.183	0.155324	465.668	0.000256349	476.613	0.000441414	450.623	0.00116129	477.45	0.00154707	468.776	0.000952525	475.266	0.00984743	494.85	1.0286e-05	476.162	0.000289483	457.623	0.0132597	469.527	0.0566747	459.271	0.000116012	468.664	0.000164515	455.505	0.000621825	457.315	0.00284133	459.271	0.000116012	468.664	0.000164515	459.564	0.0008961
447.809	0.000128157	471.358	0.000402943	483.493	0.000154049	457.602	0.0026406	449.272	0.00265879	483.771	5.41143e-05	466.087	0.00996214	483.44	0.151331	465.964	0.00024271	476.911	0.000420418	450.907	0.00109562	477.746	0.00147982	469.077	0.000896782	475.568	0.00980221	495.133	9.56068e-06	476.45	0.000265268	457.912	0.0129654	469.791	0.0543538	459.582	0.000105417	468.967	0.000152202	455.794	0.000583705	457.602	0.0026406	459.582	0.000105417	468.967	0.000152202	459.868	0.000853242
448.108	0.000118496	471.642	0.000374038	483.776	0.000140696	457.89	0.00245285	449.56	0.00246566	484.05	4.91919e-05	466.373	0.00935458	483.697	0.147382	466.26	0.000229732	477.209	0.00040021	451.191	0.00103327	478.041	0.00141482	469.377	0.000844012	475.871	0.00975327	495.416	8.88717e-06	476.738	0.000242956	458.2	0.0126755	470.056	0.0521062	459.892	9.57377e-05	469.27	0.000140806	456.084	0.000547704	457.89	0.00245285	459.892	9.57377e-05	469.27	0.000140806	460.171	0.00081198
448.408	0.000109524	471.925	0.000347112	484.06	0.000128439	458.177	0.00227735	449.848	0.00228544	484.329	4.46962e-05	466.658	0.00877983	483.954	0.14348	466.557	0.000217384	477.507	0.000380772	451.474	0.000974112	478.336	0.00135203	469.678	0.000794071	476.173	0.00970055	495.699	8.26168e-06	477.026	0.00022241	458.489	0.0123898	470.321	0.0499308	460.203	8.69004e-05	469.573	0.000130259	456.373	0.000513717	458.177	0.00227735	460.203	8.69004e-05	469.573	0.000130259	460.475	0.000772282
448.708	0.000101197	472.209	0.000322037	484.344	0.000117193	458.464	0.00211338	450.136	0.00211734	484.608	4.05923e-05	466.943	0.00823643	484.21	0.139626	466.853	0.000205637	477.804	0.000362087	451.758	0.000917992	478.631	0.0012914	469.978	0.00074682	476.476	0.009644	495.982	7.68067e-06	477.314	0.000203499	458.777	0.0121082	470.586	0.0478263	460.514	7.88365e-05	469.877	0.0001205	456.663	0.000481644	458.464	0.00211338	460.514	7.88365e-05	469.877	0.0001205	460.778	0.000734114
449.008	9.34695e-05	472.492	0.00029869	484.627	0.00010688	458.752	0.00196025	450.424	0.00196064	484.886	3.68477e-05	467.229	0.00772292	484.467	0.135821	467.149	0.000194463	478.102	0.000344135	452.042	0.000864776	478.926	0.00123289	470.279	0.000702129	476.778	0.00958359	496.265	7.14087e-06	477.602	0.000186102	459.066	0.0118305	470.85	0.0457915	460.824	7.14825e-05	470.18	0.000111472	456.952	0.00045139	458.752	0.00196025	460.824	7.14825e-05	470.18	0.000111472	461.082	0.000697442
449.308	8.63012e-05	472.775	0.00027696	484.911	9.74267e-05	459.039	0.00181734	450.711	0.00181464	485.165	3.34329e-05	467.514	0.00723793	484.724	0.132068	467.445	0.000183837	478.4	0.000326901	452.326	0.000814332	479.221	0.00117646	470.579	0.00065987	477.081	0.0095193	496.549	6.63926e-06	477.89	0.000170107	459.355	0.0115565	471.115	0.0438249	461.135	6.47797e-05	470.483	0.000103122	457.241	0.000422862	459.039	0.00181734	461.135	6.47797e-05	470.483	0.000103122	461.385	0.00066223
449.608	7.96537e-05	473.059	0.000256739	485.195	8.87669e-05	459.326	0.00168402	450.999	0.00167869	485.444	3.03202e-05	467.799	0.00678012	484.981	0.128368	467.742	0.000173733	478.698	0.000310363	452.609	0.000766533	479.517	0.00112205	470.88	0.000619925	477.383	0.00945113	496.832	6.17306e-06	478.178	0.000155408	459.643	0.0112862	471.38	0.0419252	461.445	5.86739e-05	470.786	9.5398e-05	457.531	0.000395973	459.326	0.00168402	461.445	5.86739e-05	470.786	9.5398e-05	461.689	0.000628443
449.908	7.34914e-05	473.342	0.000237928	485.478	8.08377e-05	459.614	0.00155972	451.287	0.00155216	485.723	2.74844e-05	468.084	0.00634819	485.238	0.124721	468.038	0.000164129	478.995	0.000294506	452.893	0.000721257	479.812	0.00106964	471.18	0.000582179	477.686	0.00937909	497.115	5.73969e-06	478.466	0.000141909	459.932	0.0110193	471.645	0.0400911	461.756	5.31152e-05	471.089	8.82555e-05	457.82	0.000370639	459.614	0.00155972	461.756	5.31152e-05	471.089	8.82555e-05	461.992	0.000596045
450.207	6.77807e-05	473.626	0.000220433	485.762	7.35812e-05	459.901	0.00144389	451.575	0.00143445	486.001	2.4902e-05	468.37	0.00594089	485.494	0.121131	468.334	0.000155001	479.293	0.000279309	453.177	0.000678387	480.107	0.00101916	471.481	0.000546522	477.988	0.00930321	497.398	5.33677e-06	478.754	0.000129516	460.22	0.0107558	471.909	0.0383212	462.066	4.80575e-05	471.392	8.16508e-05	458.11	0.00034678	459.901	0.00144389	462.066	4.80575e-05	471.392	8.16508e-05	462.296	0.000565
450.507	6.24905e-05	473.909	0.000204167	486.046	6.69436e-05	460.188	0.00133601	451.863	0.00132502	486.28	2.25516e-05	468.655	0.00555703	485.751	0.117597	468.63	0.000146328	479.591	0.000264755	453.46	0.000637811	480.402	0.000970583	471.781	0.00051285	478.291	0.00922351	497.681	4.9621e-06	479.042	0.000118147	460.509	0.0104957	472.174	0.036614	462.377	4.34581e-05	471.695	7.5544e-05	458.399	0.000324319	460.188	0.00133601	462.377	4.34581e-05	471.695	7.5544e-05	462.599	0.000535271
450.807	5.75914e-05	474.193	0.000189047	486.33	6.08752e-05	460.475	0.00123558	452.151	0.00122333	486.559	2.04135e-05	468.94	0.00519545	486.008	0.114121	468.927	0.00013809	479.889	0.000250825	453.744	0.000599422	480.697	0.000923858	472.082	0.000481065	478.593	0.00914005	497.964	4.61365e-06	479.33	0.000107721	460.797	0.0102388	472.439	0.0349683	462.687	3.9278e-05	471.998	6.98978e-05	458.689	0.000303184	460.475	0.00123558	462.687	3.9278e-05	471.998	6.98978e-05	462.903	0.000506821
451.107	5.30562e-05	474.476	0.000174996	486.613	5.53301e-05	460.763	0.00114214	452.439	0.00112888	486.838	1.84693e-05	469.226	0.00485503	486.265	0.110704	469.223	0.000130266	480.186	0.000237501	454.028	0.000563115	480.993	0.00087894	472.383	0.00045107	478.896	0.00905289	498.247	4.28954e-06	479.618	9.81656e-05	461.086	0.00998513	472.704	0.0333825	462.998	3.5481e-05	472.301	6.46777e-05	458.978	0.000283305	460.763	0.00114214	462.998	3.5481e-05	472.301	6.46777e-05	463.206	0.000479613
451.407	4.88594e-05	474.76	0.000161943	486.897	5.02657e-05	461.05	0.00105525	452.727	0.00104121	487.116	1.67024e-05	469.511	0.00453472	486.522	0.107346	469.519	0.000122839	480.484	0.000224763	454.312	0.000528792	481.288	0.000835783	472.683	0.000422775	479.198	0.0089621	498.53	3.98802e-06	479.906	8.94129e-05	461.374	0.00973466	472.968	0.0318551	463.308	3.20341e-05	472.605	5.98517e-05	459.267	0.000264614	461.05	0.00105525	463.308	3.20341e-05	472.605	5.98517e-05	463.51	0.000453611
451.707	4.49771e-05	475.043	0.00014982	487.181	4.56428e-05	461.337	0.000974498	453.015	0.000959878	487.395	1.50975e-05	469.796	0.00423347	486.778	0.104049	469.815	0.000115789	480.782	0.000212594	454.595	0.000496358	481.583	0.000794342	472.984	0.000396093	479.5	0.00886777	498.813	3.70749e-06	480.194	8.13996e-05	461.663	0.00948736	473.233	0.0303849	463.619	2.89067e-05	472.908	5.53902e-05	459.557	0.000247049	461.337	0.000974498	463.619	2.89067e-05	472.908	5.53902e-05	463.813	0.000428776
452.007	4.13871e-05	475.327	0.000138564	487.464	4.14249e-05	461.625	0.00089948	453.303	0.000884459	487.674	1.36403e-05	470.082	0.00395032	487.035	0.100813	470.111	0.000109102	481.08	0.000200976	454.879	0.00046572	481.878	0.000754572	473.284	0.000370943	479.803	0.00876997	499.096	3.44647e-06	480.482	7.40672e-05	461.951	0.00924321	473.498	0.0289704	463.929	2.60707e-05	473.211	5.12655e-05	459.846	0.00023055	461.625	0.00089948	463.929	2.60707e-05	473.211	5.12655e-05	464.117	0.000405072
452.306	3.80687e-05	475.61	0.000128116	487.748	3.75786e-05	461.912	0.000829829	453.591	0.000814561	487.953	1.2318e-05	470.367	0.0036843	487.292	0.0976394	470.408	0.000102758	481.377	0.000189891	455.163	0.000436792	482.173	0.000716428	473.585	0.000347245	480.105	0.00866881	499.379	3.20357e-06	480.77	6.73612e-05	462.24	0.00900221	473.763	0.02761	464.24	2.35006e-05	473.514	4.74523e-05	460.136	0.000215057	461.912	0.000829829	464.24	2.35006e-05	473.514	4.74523e-05	464.42	0.000382463
452.606	3.50023e-05	475.894	0.000118421	488.032	3.40728e-05	462.199	0.000765196	453.879	0.000749816	488.231	1.11186e-05	470.652	0.00343453	487.549	0.0945279	470.704	9.67446e-05	481.675	0.00017932	455.447	0.000409489	482.468	0.000679864	473.885	0.000324924	480.408	0.00856439	499.662	2.97751e-06	481.058	6.12316e-05	462.528	0.00876435	474.027	0.0263024	464.55	2.11726e-05	473.817	4.39268e-05	460.425	0.000200517	462.199	0.000765196	464.55	2.11726e-05	473.817	4.39268e-05	464.724	0.000360913
452.906	3.217e-05	476.177	0.000109426	488.315	3.08792e-05	462.487	0.00070525	454.167	0.000689874	488.51	1.00312e-05	470.938	0.00320012	487.806	0.0914792	471	9.10448e-05	481.973	0.000169247	455.73	0.000383731	482.764	0.000644835	474.186	0.000303909	480.71	0.00845684	499.945	2.76712e-06	481.346	5.56316e-05	462.817	0.00852966	474.292	0.0250462	464.861	1.90651e-05	474.12	4.06673e-05	460.715	0.000186877	462.487	0.00070525	464.861	1.90651e-05	474.12	4.06673e-05	465.027	0.000340384
453.206	2.9555e-05	476.461	0.000101084	488.599	2.79713e-05	462.774	0.00064968	454.455	0.00063441	488.789	9.04595e-06	471.223	0.00298026	488.062	0.0884937	471.296	8.56447e-05	482.271	0.000159653	456.014	0.000359441	483.059	0.000611295	474.486	0.00028413	481.013	0.00834627	500.228	2.57129e-06	481.634	5.05183e-05	463.105	0.00829815	474.557	0.0238398	465.171	1.71584e-05	474.423	3.76535e-05	461.004	0.000174087	462.774	0.00064968	465.171	1.71584e-05	474.423	3.76535e-05	465.331	0.000320842
453.506	2.71414e-05	476.744	9.33495e-05	488.883	2.53249e-05	463.061	0.000598195	454.742	0.000583115	489.068	8.15361e-06	471.508	0.00277414	488.319	0.0855717	471.593	8.05306e-05	482.568	0.000150521	456.298	0.000336545	483.354	0.000579202	474.787	0.000265524	481.315	0.00823281	500.512	2.38902e-06	481.922	4.58519e-05	463.394	0.00806984	474.822	0.022682	465.482	1.54342e-05	474.726	3.48667e-05	461.293	0.000162099	463.061	0.000598195	465.482	1.54342e-05	474.726	3.48667e-05	465.634	0.000302251
453.806	2.49146e-05	477.028	8.61803e-05	489.167	2.29178e-05	463.348	0.000550518	455.03	0.000535702	489.346	7.34584e-06	471.793	0.00258102	488.576	0.0827132	471.889	7.56891e-05	482.866	0.000141835	456.581	0.000314973	483.649	0.00054851	475.087	0.000248027	481.618	0.0081166	500.795	2.21936e-06	482.21	4.15955e-05	463.682	0.00784475	475.086	0.0215713	465.792	1.3876e-05	475.029	3.22896e-05	461.583	0.000150869	463.348	0.000550518	465.792	1.3876e-05	475.029	3.22896e-05	465.938	0.000284576
454.106	2.28611e-05	477.311	7.95372e-05	489.45	2.07294e-05	463.636	0.000506392	455.318	0.000491899	489.625	6.61499e-06	472.079	0.00240016	488.833	0.0799186	472.185	7.11076e-05	483.164	0.000133578	456.865	0.000294656	483.944	0.000519174	475.388	0.000231581	481.92	0.00799778	501.078	2.06143e-06	482.498	3.77152e-05	463.971	0.00762293	475.351	0.0205063	466.103	1.24685e-05	475.333	2.99062e-05	461.872	0.000140353	463.636	0.000506392	466.103	1.24685e-05	475.333	2.99062e-05	466.241	0.000267784
454.405	2.0968e-05	477.595	7.33833e-05	489.734	1.87409e-05	463.923	0.000465573	455.606	0.000451454	489.904	5.95405e-06	472.364	0.00223089	489.09	0.0771877	472.481	6.67739e-05	483.462	0.000125734	457.149	0.000275531	484.239	0.000491153	475.688	0.000216129	482.223	0.00787649	501.361	1.91443e-06	482.786	3.41796e-05	464.259	0.00740438	475.616	0.0194856	466.413	1.11979e-05	475.636	2.77016e-05	462.162	0.000130511	463.923	0.000465573	466.413	1.11979e-05	475.636	2.77016e-05	466.545	0.00025184
454.705	1.92236e-05	477.878	6.76842e-05	490.018	1.69349e-05	464.21	0.000427833	455.894	0.000414128	490.183	5.35664e-06	472.649	0.00207254	489.346	0.0745205	472.778	6.26764e-05	483.759	0.000118286	457.433	0.000257535	484.535	0.000464402	475.989	0.000201618	482.525	0.00775287	501.644	1.7776e-06	483.074	3.09598e-05	464.548	0.00718917	475.881	0.0185078	466.724	1.00516e-05	475.939	2.56623e-05	462.451	0.000121303	464.21	0.000427833	466.724	1.00516e-05	475.939	2.56623e-05	466.848	0.000236711
455.005	1.76168e-05	478.162	6.2408e-05	490.301	1.52955e-05	464.498	0.000392958	456.182	0.000379699	490.461	4.81691e-06	472.935	0.00192448	489.603	0.0719169	473.074	5.88038e-05	484.057	0.000111219	457.716	0.000240608	484.83	0.00043888	476.289	0.000187995	482.828	0.00762709	501.927	1.65025e-06	483.362	2.80291e-05	464.836	0.00697731	476.145	0.0175717	467.034	9.01782e-06	476.242	2.37756e-05	462.741	0.000112693	464.498	0.000392958	467.034	9.01782e-06	476.242	2.37756e-05	467.152	0.000222365
455.305	1.61374e-05	478.445	5.75247e-05	490.585	1.38081e-05	464.785	0.000360748	456.47	0.00034796	490.74	4.32955e-06	473.22	0.00178613	489.86	0.0693767	473.37	5.51454e-05	484.355	0.000104517	458	0.000224696	485.125	0.000414543	476.59	0.000175213	483.13	0.0074993	502.21	1.53171e-06	483.65	2.53631e-05	465.125	0.00676884	476.41	0.0166758	467.345	8.08617e-06	476.545	2.20299e-05	463.03	0.000104646	464.785	0.000360748	467.345	8.08617e-06	476.545	2.20299e-05	467.455	0.000208771
455.605	1.47759e-05	478.728	5.30065e-05	490.869	1.24593e-05	465.072	0.000331014	456.758	0.000318715	491.019	3.88969e-06	473.505	0.00165691	490.117	0.0668996	473.666	5.16909e-05	484.653	9.81665e-05	458.284	0.000209743	485.42	0.000391352	476.891	0.000163225	483.432	0.00736964	502.493	1.4214e-06	483.938	2.2939e-05	465.414	0.00656381	476.675	0.0158189	467.656	7.24699e-06	476.848	2.04144e-05	463.319	9.71286e-05	465.072	0.000331014	467.656	7.24699e-06	476.848	2.04144e-05	467.758	0.000195897
455.905	1.35233e-05	479.012	4.88274e-05	491.152	1.12367e-05	465.36	0.000303581	457.046	0.000291782	491.297	3.4929e-06	473.791	0.00153628	490.374	0.0644854	473.962	4.84303e-05	484.951	9.21515e-05	458.567	0.000195699	485.715	0.000369264	477.191	0.000151987	483.735	0.0072383	502.776	1.31874e-06	484.226	2.07362e-05	465.702	0.00636224	476.939	0.0149996	467.966	6.49151e-06	477.151	1.89192e-05	463.609	9.01093e-05	465.36	0.000303581	467.966	6.49151e-06	477.151	1.89192e-05	468.062	0.000183713
456.205	1.23716e-05	479.295	4.4963e-05	491.436	1.01293e-05	465.647	0.000278284	457.334	0.000266993	491.576	3.13514e-06	474.076	0.00142373	490.63	0.0621336	474.259	4.53544e-05	485.248	8.6458e-05	458.851	0.000182514	486.011	0.00034824	477.492	0.000141456	484.037	0.00710542	503.059	1.22322e-06	484.514	1.87354e-05	465.991	0.00616418	477.204	0.0142167	468.277	5.81177e-06	477.454	1.75351e-05	463.898	8.35582e-05	465.647	0.000278284	468.277	5.81177e-06	477.454	1.75351e-05	468.365	0.000172189
456.504	1.13129e-05	479.579	4.13908e-05	491.72	9.1265e-06	465.934	0.000254969	457.622	0.000244187	491.855	2.81274e-06	474.361	0.00131878	490.887	0.0598438	474.555	4.24538e-05	485.546	8.10723e-05	459.135	0.000170141	486.306	0.000328241	477.792	0.000131593	484.34	0.00697116	503.342	1.13435e-06	484.802	1.69191e-05	466.279	0.00596966	477.469	0.013469	468.587	5.2005e-06	477.757	1.62537e-05	464.188	7.74471e-05	465.934	0.000254969	468.587	5.2005e-06	477.757	1.62537e-05	468.669	0.000161296
456.804	1.03403e-05	479.862	3.80898e-05	492.003	8.21902e-06	466.222	0.000233491	457.91	0.000223219	492.134	2.52235e-06	474.647	0.00122097	491.144	0.0576156	474.851	3.972e-05	485.844	7.59808e-05	459.419	0.000158536	486.601	0.000309228	478.093	0.00012236	484.642	0.0068357	503.625	1.05167e-06	485.09	1.52712e-05	466.568	0.0057787	477.734	0.0127551	468.898	4.65111e-06	478.061	1.50671e-05	464.477	7.17493e-05	466.222	0.000233491	468.898	4.65111e-06	478.061	1.50671e-05	468.972	0.000151008
457.104	9.44708e-06	480.146	3.50403e-05	492.287	7.39818e-06	466.509	0.000213717	458.198	0.000203949	492.412	2.26093e-06	474.932	0.00112985	491.401	0.0554482	475.147	3.71445e-05	486.142	7.11704e-05	459.702	0.000147656	486.896	0.000291162	478.393	0.000113721	484.945	0.00669919	503.908	9.7477e-07	485.378	1.37768e-05	466.856	0.00559135	477.998	0.012074	469.208	4.15761e-06	478.364	1.39681e-05	464.767	6.64393e-05	466.509	0.000213717	469.208	4.15761e-06	478.364	1.39681e-05	469.276	0.000141295
457.404	8.62715e-06	480.429	3.22241e-05	492.571	6.65609e-06	466.796	0.00019552	458.485	0.00018625	492.691	2.0257e-06	475.217	0.00104502	491.658	0.0533412	475.444	3.47194e-05	486.439	6.66283e-05	459.986	0.00013746	487.191	0.000274008	478.694	0.000105641	485.247	0.0065618	504.192	9.0325e-07	485.666	1.24224e-05	467.145	0.00540762	478.263	0.0114243	469.519	3.71455e-06	478.667	1.29502e-05	465.056	6.14932e-05	466.796	0.00019552	469.519	3.71455e-06	478.667	1.29502e-05	469.579	0.000132132
457.704	7.87484e-06	480.713	2.96242e-05	492.855	5.98553e-06	467.083	0.000178784	458.773	0.000170002	492.97	1.81417e-06	475.502	0.000966085	491.914	0.051294	475.74	3.2437e-05	486.737	6.23422e-05	460.27	0.000127911	487.486	0.000257728	478.994	9.80878e-05	485.55	0.00642368	504.475	8.36748e-07	485.954	1.11955e-05	467.433	0.00522755	478.528	0.010805	469.829	3.31699e-06	478.97	1.20071e-05	465.345	5.68884e-05	467.083	0.000178784	469.829	3.31699e-06	478.97	1.20071e-05	469.883	0.000123494
458.004	7.18487e-06	480.996	2.72248e-05	493.138	5.37992e-06	467.371	0.0001634	459.061	0.000155094	493.249	1.62404e-06	475.788	0.00089267	492.171	0.0493057	476.036	3.029e-05	487.035	5.83002e-05	460.553	0.00011897	487.782	0.000242287	479.295	9.10307e-05	485.852	0.006285	504.758	7.74921e-07	486.242	1.00846e-05	467.722	0.00505115	478.793	0.0102149	470.14	2.96046e-06	479.273	1.11333e-05	465.635	5.26033e-05	467.371	0.0001634	470.14	2.96046e-06	479.273	1.11333e-05	470.186	0.000115355
458.304	6.55237e-06	481.28	2.5011e-05	493.422	4.83325e-06	467.658	0.000149265	459.349	0.000141422	493.527	1.45324e-06	476.073	0.000824428	492.428	0.0473756	476.332	2.82714e-05	487.333	5.44905e-05	460.837	0.000110605	488.077	0.000227651	479.595	8.44402e-05	486.155	0.00614591	505.041	7.17453e-07	486.53	9.07945e-06	468.01	0.00487846	479.057	0.00965288	470.45	2.64089e-06	479.576	1.03235e-05	465.924	4.86179e-05	467.658	0.000149265	470.45	2.64089e-06	479.576	1.03235e-05	470.49	0.000107691
458.603	5.97282e-06	481.563	2.29693e-05	493.706	4.34003e-06	467.945	0.000136285	459.637	0.000128891	493.806	1.29989e-06	476.358	0.000761027	492.685	0.0455031	476.629	2.63744e-05	487.63	5.09022e-05	461.121	0.00010278	488.372	0.000213786	479.896	7.82886e-05	486.457	0.00600658	505.324	6.64047e-07	486.818	8.17033e-06	468.299	0.00470947	479.322	0.00911791	470.761	2.35462e-06	479.879	9.57289e-06	466.214	4.49129e-05	467.945	0.000136285	470.761	2.35462e-06	479.879	9.57289e-06	470.793	0.000100479
458.903	5.44203e-06	481.847	2.10869e-05	493.989	3.89526e-06	468.233	0.000124373	459.925	0.000117412	494.085	1.16229e-06	476.644	0.000702155	492.942	0.0436872	476.925	2.45926e-05	487.928	4.75244e-05	461.405	9.5465e-05	488.667	0.00020066	480.196	7.25495e-05	486.76	0.00586715	505.607	6.14427e-07	487.106	7.34854e-06	468.587	0.00454421	479.587	0.00860891	471.071	2.09831e-06	480.182	8.87704e-06	466.503	4.14704e-05	468.233	0.000124373	471.071	2.09831e-06	480.182	8.87704e-06	471.097	9.36978e-05
459.203	4.95612e-06	482.13	1.93519e-05	494.273	3.4944e-06	468.52	0.000113445	460.213	0.000106902	494.364	1.0389e-06	476.929	0.000647517	493.198	0.0419271	477.221	2.29199e-05	488.226	4.43466e-05	461.688	8.86299e-05	488.962	0.000188239	480.497	6.71979e-05	487.062	0.00572777	505.89	5.68335e-07	487.394	6.60608e-06	468.876	0.00438269	479.852	0.00812485	471.382	1.86895e-06	480.485	8.23186e-06	466.793	3.82734e-05	468.52	0.000113445	471.382	1.86895e-06	480.485	8.23186e-06	471.4	8.73245e-05
459.503	4.51151e-06	482.414	1.77534e-05	494.557	3.13329e-06	468.807	0.000103426	460.501	9.72841e-05	494.642	9.28316e-07	477.214	0.000596836	493.455	0.040222	477.517	2.13504e-05	488.524	4.13589e-05	461.972	8.22462e-05	489.257	0.000176494	480.797	6.22103e-05	487.364	0.00558861	506.173	5.25531e-07	487.682	5.93566e-06	469.164	0.00422491	480.116	0.00766473	471.692	1.66382e-06	480.789	7.63358e-06	467.082	3.53059e-05	468.807	0.000103426	471.692	1.66382e-06	480.789	7.63358e-06	471.704	8.13385e-05
459.803	4.10488e-06	482.697	1.62811e-05	494.84	2.80815e-06	469.095	9.42445e-05	460.789	8.84871e-05	494.921	8.29281e-07	477.5	0.00054985	493.712	0.038571	477.813	1.98786e-05	488.821	3.85515e-05	462.256	7.62871e-05	489.553	0.000165393	481.098	5.75642e-05	487.667	0.00544979	506.456	4.8579e-07	487.97	5.3306e-06	469.453	0.00407087	480.381	0.00722758	472.003	1.48046e-06	481.092	7.0787e-06	467.371	3.25528e-05	469.095	9.42445e-05	472.003	1.48046e-06	481.092	7.0787e-06	472.007	7.57201e-05
460.103	3.73316e-06	482.981	1.49256e-05	495.124	2.51556e-06	469.382	8.58356e-05	461.077	8.04453e-05	495.2	7.40649e-07	477.785	0.000506313	493.969	0.036973	478.11	1.8499e-05	489.119	3.59153e-05	462.54	7.07269e-05	489.848	0.000154909	481.399	5.32384e-05	487.969	0.00531146	506.739	4.48903e-07	488.258	4.78484e-06	469.741	0.00392058	480.646	0.00681245	472.313	1.31665e-06	481.395	6.56401e-06	467.661	2.99999e-05	469.382	8.58356e-05	472.313	1.31665e-06	481.395	6.56401e-06	472.311	7.04498e-05
460.403	3.39353e-06	483.264	1.3678e-05	495.408	2.2524e-06	469.669	7.81381e-05	461.365	7.30978e-05	495.479	6.6139e-07	478.07	0.000465993	494.226	0.0354272	478.406	1.72066e-05	489.417	3.34412e-05	462.823	6.55415e-05	490.143	0.000145012	481.699	4.92131e-05	488.272	0.00517376	507.022	4.14674e-07	488.546	4.29281e-06	470.03	0.00377402	480.911	0.00641841	472.624	1.17039e-06	481.698	6.08654e-06	467.95	2.76338e-05	469.669	7.81381e-05	472.624	1.17039e-06	481.698	6.08654e-06	472.614	6.55093e-05
460.702	3.08336e-06	483.548	1.25301e-05	495.692	2.01583e-06	469.956	7.10955e-05	461.653	6.63881e-05	495.757	5.90571e-07	478.356	0.000428671	494.482	0.0339325	478.702	1.59965e-05	489.715	3.11207e-05	463.107	6.0708e-05	490.438	0.000135676	482	4.54692e-05	488.574	0.00503682	507.305	3.82922e-07	488.834	3.84948e-06	470.318	0.0036312	481.175	0.00604458	472.934	1.03987e-06	482.001	5.64354e-06	468.24	2.54421e-05	469.956	7.10955e-05	472.934	1.03987e-06	482.001	5.64354e-06	472.918	6.08809e-05
461.002	2.80024e-06	483.831	1.14743e-05	495.975	1.80328e-06	470.244	6.46554e-05	461.941	6.02641e-05	496.036	5.27353e-07	478.641	0.000394144	494.739	0.032488	478.998	1.48641e-05	490.012	2.89457e-05	463.391	5.62047e-05	490.733	0.000126873	482.3	4.1989e-05	488.877	0.00490077	507.588	3.53476e-07	489.122	3.45023e-06	470.607	0.00349208	481.44	0.00569008	473.245	9.23465e-07	482.304	5.23248e-06	468.529	2.34129e-05	470.244	6.46554e-05	473.245	9.23465e-07	482.304	5.23248e-06	473.221	5.65475e-05
461.302	2.54193e-06	484.115	1.05037e-05	496.259	1.61241e-06	470.531	5.87694e-05	462.229	5.46776e-05	496.315	4.70979e-07	478.926	0.000362218	494.996	0.0310927	479.295	1.38049e-05	490.31	2.69081e-05	463.674	5.20112e-05	491.029	0.000118578	482.601	3.87555e-05	489.179	0.00476573	507.871	3.26176e-07	489.41	3.09089e-06	470.895	0.00335667	481.705	0.00535408	473.555	8.19704e-07	482.607	4.85103e-06	468.819	2.15351e-05	470.531	5.87694e-05	473.555	8.19704e-07	482.607	4.85103e-06	473.525	5.24929e-05
461.602	2.3064e-06	484.398	9.61161e-06	496.543	1.44111e-06	470.818	5.33926e-05	462.516	4.95841e-05	496.594	4.20768e-07	479.211	0.000332713	495.253	0.0297455	479.591	1.28148e-05	490.608	2.50006e-05	463.958	4.8108e-05	491.324	0.000110766	482.901	3.57529e-05	489.482	0.00463182	508.155	3.00875e-07	489.698	2.76764e-06	471.184	0.00322494	481.97	0.00503576	473.866	7.2727e-07	482.91	4.49702e-06	469.108	1.97983e-05	470.818	5.33926e-05	473.866	7.2727e-07	482.91	4.49702e-06	473.828	4.87015e-05
461.902	2.09173e-06	484.681	8.79204e-06	496.826	1.28745e-06	471.106	4.84836e-05	462.804	4.49426e-05	496.872	3.76106e-07	479.497	0.00030546	495.51	0.0284454	479.887	1.18898e-05	490.906	2.32159e-05	464.242	4.44769e-05	491.619	0.000103414	483.202	3.29661e-05	489.784	0.00449916	508.438	2.77434e-07	489.986	2.47701e-06	471.473	0.00309687	482.234	0.00473434	474.176	6.44976e-07	483.213	4.16845e-06	469.397	1.81929e-05	471.106	4.84836e-05	474.176	6.44976e-07	483.213	4.16845e-06	474.132	4.51586e-05
462.202	1.89618e-06	484.965	8.03938e-06	497.11	1.14969e-06	471.393	4.4004e-05	463.092	4.07152e-05	497.151	3.36444e-07	479.782	0.000280301	495.766	0.0271913	480.183	1.10261e-05	491.203	2.15472e-05	464.526	4.11006e-05	491.914	9.6499e-05	483.502	3.03811e-05	490.087	0.00436786	508.721	2.55724e-07	490.274	2.21587e-06	471.761	0.00297243	482.499	0.00444906	474.487	5.71755e-07	483.517	3.86347e-06	469.687	1.67095e-05	471.393	4.4004e-05	474.487	5.71755e-07	483.517	3.86347e-06	474.435	4.18498e-05
462.502	1.71816e-06	485.248	7.34841e-06	497.394	1.02627e-06	471.68	3.99183e-05	463.38	3.68668e-05	497.43	3.01288e-07	480.067	0.000257087	496.023	0.0259823	480.48	1.02201e-05	491.501	1.99878e-05	464.809	3.79627e-05	492.209	8.99983e-05	483.803	2.79846e-05	490.389	0.00423801	509.004	2.35624e-07	490.562	1.98136e-06	472.05	0.00285158	482.764	0.00417917	474.798	5.06648e-07	483.82	3.58039e-06	469.976	1.53398e-05	471.68	3.99183e-05	474.798	5.06648e-07	483.82	3.58039e-06	474.739	3.87617e-05
462.801	1.55617e-06	485.532	6.71434e-06	497.677	9.15765e-07	471.968	3.61939e-05	463.668	3.33655e-05	497.709	2.70197e-07	480.353	0.000235678	496.28	0.0248171	480.776	9.46837e-06	491.799	1.85316e-05	465.093	3.5048e-05	492.504	8.38909e-05	484.103	2.57639e-05	490.692	0.00410972	509.287	2.1702e-07	490.85	1.77088e-06	472.338	0.0027343	483.029	0.00392397	475.108	4.48795e-07	484.123	3.31761e-06	470.266	1.40756e-05	471.968	3.61939e-05	475.108	4.48795e-07	484.123	3.31761e-06	475.042	3.58814e-05
463.101	1.40886e-06	485.815	6.1327e-06	497.961	8.16879e-07	472.255	3.28006e-05	463.956	3.01816e-05	497.987	2.42776e-07	480.638	0.000215945	496.537	0.0236948	481.072	8.76763e-06	492.097	1.71725e-05	465.377	3.23418e-05	492.8	7.81564e-05	484.404	2.37074e-05	490.994	0.00398309	509.57	1.9981e-07	491.138	1.58208e-06	472.627	0.00262055	483.293	0.00368277	475.419	3.97426e-07	484.426	3.07368e-06	470.555	1.29095e-05	472.255	3.28006e-05	475.419	3.97426e-07	484.426	3.07368e-06	475.346	3.31966e-05
463.401	1.27499e-06	486.099	5.59937e-06	498.245	7.28453e-07	472.542	2.97107e-05	464.244	2.72878e-05	498.266	2.18673e-07	480.923	0.000197766	496.794	0.0226143	481.368	8.11483e-06	492.394	1.59049e-05	465.66	2.98306e-05	493.095	7.27752e-05	484.704	2.1804e-05	491.296	0.00385819	509.853	1.83893e-07	491.426	1.41285e-06	472.915	0.00251029	483.558	0.00345492	475.729	3.51849e-07	484.729	2.84724e-06	470.845	1.18344e-05	472.542	2.97107e-05	475.729	3.51849e-07	484.729	2.84724e-06	475.649	3.06956e-05
463.701	1.15339e-06	486.382	5.11053e-06	498.528	6.4944e-07	472.829	2.68983e-05	464.532	2.4659e-05	498.545	1.97574e-07	481.209	0.000181027	497.05	0.0215746	481.664	7.50705e-06	492.692	1.47234e-05	465.944	2.75014e-05	493.39	6.77286e-05	485.005	2.00432e-05	491.599	0.00373512	510.136	1.69179e-07	491.714	1.26124e-06	473.204	0.00240348	483.823	0.00323978	476.04	3.11445e-07	485.032	2.63704e-06	471.134	1.08438e-05	472.829	2.68983e-05	476.04	3.11445e-07	485.032	2.63704e-06	475.953	2.83673e-05
464.001	1.04302e-06	486.666	4.66266e-06	498.812	5.78891e-07	473.117	2.43401e-05	464.82	2.22724e-05	498.824	1.79203e-07	481.494	0.000165623	497.307	0.0205745	481.961	6.94154e-06	492.99	1.36228e-05	466.228	2.53422e-05	493.685	6.29985e-05	485.305	1.84153e-05	491.901	0.00361394	510.419	1.55582e-07	492.002	1.12552e-06	473.492	0.00230007	484.088	0.00303672	476.35	2.75662e-07	485.335	2.44192e-06	471.423	9.93148e-06	473.117	2.43401e-05	476.35	2.75662e-07	485.335	2.44192e-06	476.256	2.62012e-05
464.301	9.42914e-07	486.949	4.2525e-06	499.096	5.15955e-07	473.404	2.20141e-05	465.108	2.01066e-05	499.102	1.63313e-07	481.779	0.000151455	497.564	0.019613	482.257	6.4157e-06	493.288	1.25984e-05	466.512	2.33416e-05	493.98	5.85678e-05	485.606	1.69111e-05	492.204	0.00349474	510.702	1.43024e-07	492.29	1.00411e-06	473.781	0.00220001	484.352	0.00284518	476.661	2.44003e-07	485.638	2.26081e-06	471.713	9.09183e-06	473.404	2.20141e-05	476.661	2.44003e-07	485.638	2.26081e-06	476.56	2.41872e-05
464.601	8.52184e-07	487.233	3.87704e-06	499.38	4.59863e-07	473.691	1.99005e-05	465.396	1.81423e-05	499.381	1.49691e-07	482.064	0.00013843	497.821	0.018689	482.553	5.92705e-06	493.585	1.16454e-05	466.795	2.14889e-05	494.275	5.442e-05	485.907	1.5522e-05	492.506	0.00337757	510.985	1.31429e-07	492.578	8.95585e-07	474.069	0.00210325	484.617	0.00266457	476.971	2.16029e-07	485.941	2.09271e-06	472.002	8.31948e-06	473.691	1.99005e-05	476.971	2.16029e-07	485.941	2.09271e-06	476.863	2.2316e-05
464.9	7.70019e-07	487.516	3.53348e-06	499.663	4.09924e-07	473.979	1.79808e-05	465.684	1.63617e-05	499.66	1.38147e-07	482.35	0.000126462	498.078	0.0178015	482.849	5.47326e-06	493.883	1.07596e-05	467.079	1.97741e-05	494.571	5.05392e-05	486.207	1.424e-05	492.809	0.0032625	511.268	1.20728e-07	492.865	7.98653e-07	474.358	0.00200975	484.882	0.00249435	477.282	1.91345e-07	486.245	1.93669e-06	472.292	7.60945e-06	473.979	1.79808e-05	477.282	1.91345e-07	486.245	1.93669e-06	477.167	2.05785e-05
465.2	6.95678e-07	487.8	3.21927e-06	499.947	3.65518e-07	474.266	1.62382e-05	465.972	1.47484e-05	499.939	1.28519e-07	482.635	0.000115471	498.334	0.0169494	483.146	5.05216e-06	494.181	9.9368e-06	467.363	1.81877e-05	494.866	4.69106e-05	486.508	1.30575e-05	493.111	0.00314958	511.551	1.10858e-07	493.153	7.12159e-07	474.646	0.00191944	485.147	0.00233401	477.592	1.69603e-07	486.548	1.7919e-06	472.581	6.95713e-06	474.266	1.62382e-05	477.592	1.69603e-07	486.548	1.7919e-06	477.47	1.89662e-05
465.5	6.28485e-07	488.083	2.93204e-06	500.231	3.26087e-07	474.553	1.46572e-05	466.259	1.32875e-05	500.217	1.20666e-07	482.92	0.000105384	498.591	0.0161318	483.442	4.66165e-06	494.479	9.17307e-06	467.646	1.67209e-05	495.161	4.35197e-05	486.808	1.19675e-05	493.414	0.00303886	511.835	1.01759e-07	493.441	6.35055e-07	474.935	0.00183227	485.411	0.00218303	477.903	1.5049e-07	486.851	1.65755e-06	472.871	6.35819e-06	474.553	1.46572e-05	477.903	1.5049e-07	486.851	1.65755e-06	477.774	1.74712e-05
465.8	5.67819e-07	488.367	2.66959e-06	500.514	2.91132e-07	474.841	1.32235e-05	466.547	1.19653e-05	500.496	1.14469e-07	483.206	9.61294e-05	498.848	0.0153475	483.738	4.29981e-06	494.776	8.46475e-06	467.93	1.53654e-05	495.456	4.03528e-05	487.109	1.09633e-05	493.716	0.00293038	512.118	9.3374e-08	493.729	5.66402e-07	475.223	0.00174819	485.676	0.00204094	478.213	1.33733e-07	487.154	1.53288e-06	473.16	5.80864e-06	474.841	1.32235e-05	478.213	1.33733e-07	487.154	1.53288e-06	478.077	1.60859e-05
466.1	5.13119e-07	488.65	2.42991e-06	500.798	2.60207e-07	475.128	1.19241e-05	466.835	1.07693e-05	500.775	1.09829e-07	483.491	8.76443e-05	499.105	0.0145956	484.034	3.96479e-06	495.074	7.80836e-06	468.214	1.41134e-05	495.751	3.7397e-05	487.409	1.00388e-05	494.019	0.00282419	512.401	8.56521e-08	494.017	5.05353e-07	475.512	0.00166712	485.941	0.00190728	478.524	1.19086e-07	487.457	1.41723e-06	473.45	5.30475e-06	475.128	1.19241e-05	478.524	1.19086e-07	487.457	1.41723e-06	478.381	1.4803e-05
466.4	4.63871e-07	488.934	2.21115e-06	501.082	2.32912e-07	475.415	1.07471e-05	467.123	9.68797e-06	501.053	1.06666e-07	483.776	7.98684e-05	499.362	0.013875	484.331	3.65488e-06	495.372	7.20064e-06	468.498	1.29577e-05	496.047	3.46399e-05	487.71	9.18829e-06	494.321	0.00272032	512.684	7.85449e-08	494.305	4.51147e-07	475.8	0.00158901	486.206	0.00178161	478.834	1.06336e-07	487.76	1.30996e-06	473.739	4.84306e-06	475.415	1.07471e-05	478.834	1.06336e-07	487.76	1.30996e-06	478.684	1.3616e-05
466.7	4.19611e-07	489.217	2.0116e-06	501.365	2.08892e-07	475.702	9.6814e-06	467.411	8.71083e-06	501.332	1.04916e-07	484.062	7.27463e-05	499.619	0.0131848	484.627	3.36846e-06	495.67	6.6385e-06	468.781	1.18914e-05	496.342	3.20698e-05	488.01	8.40629e-06	494.624	0.0026188	512.967	7.20077e-08	494.593	4.03105e-07	476.089	0.0015138	486.47	0.00166351	479.145	9.52951e-08	488.063	1.21047e-06	474.028	4.42036e-06	475.702	9.6814e-06	479.145	9.52951e-08	488.063	1.21047e-06	478.988	1.25184e-05
466.999	3.79915e-07	489.501	1.82967e-06	501.649	1.8783e-07	475.99	8.71708e-06	467.699	7.82832e-06	501.611	1.04532e-07	484.347	6.62263e-05	499.875	0.012524	484.923	3.10403e-06	495.967	6.11905e-06	469.065	1.09082e-05	496.637	2.96753e-05	488.311	7.68785e-06	494.926	0.00251965	513.25	6.5999e-08	494.881	3.60614e-07	476.377	0.00144143	486.735	0.00155256	479.455	8.57983e-08	488.366	1.11821e-06	474.318	4.03369e-06	475.99	8.71708e-06	479.455	8.57983e-08	488.366	1.11821e-06	479.291	1.15043e-05
467.299	3.44402e-07	489.784	1.66394e-06	501.933	1.69447e-07	476.277	7.84492e-06	467.987	7.03169e-06	501.89	1.05484e-07	484.632	6.02607e-05	500.132	0.0118916	485.219	2.86016e-06	496.265	5.6396e-06	469.349	1.00021e-05	496.932	2.74459e-05	488.611	7.0283e-06	495.228	0.00242289	513.533	6.04803e-08	495.169	3.23131e-07	476.666	0.00137182	487	0.0014484	479.766	7.77033e-08	488.669	1.03268e-06	474.607	3.68029e-06	476.277	7.84492e-06	479.766	7.77033e-08	488.669	1.03268e-06	479.595	1.05681e-05
467.599	3.1273e-07	490.068	1.51305e-06	502.217	1.53495e-07	476.564	7.05655e-06	468.275	6.31296e-06	502.168	1.07755e-07	484.918	5.48053e-05	500.389	0.0112866	485.515	2.63555e-06	496.563	5.19761e-06	469.633	9.16764e-06	497.227	2.53716e-05	488.912	6.42329e-06	495.531	0.00232854	513.816	5.5416e-08	495.457	2.90169e-07	476.954	0.00130491	487.265	0.00135064	480.076	7.08878e-08	488.973	9.53397e-07	474.897	3.35762e-06	476.564	7.05655e-06	480.076	7.08878e-08	488.973	9.53397e-07	479.898	9.7046e-06
467.899	2.84589e-07	490.351	1.3758e-06	502.5	1.39756e-07	476.852	6.34428e-06	468.563	5.66486e-06	502.447	1.11343e-07	485.203	4.98189e-05	500.646	0.0107083	485.812	2.42894e-06	496.861	4.7907e-06	469.916	8.39956e-06	497.522	2.34429e-05	489.212	5.8688e-06	495.833	0.0022366	514.099	5.0773e-08	495.745	2.61297e-07	477.243	0.00124064	487.529	0.00125894	480.387	6.52476e-08	489.276	8.79924e-07	475.186	3.06332e-06	476.852	6.34428e-06	480.387	6.52476e-08	489.276	8.79924e-07	480.202	8.90882e-06
468.199	2.59703e-07	490.634	1.25106e-06	502.784	1.28041e-07	477.139	5.70113e-06	468.851	5.08076e-06	502.726	1.16262e-07	485.488	4.52638e-05	500.903	0.0101555	486.108	2.23921e-06	497.158	4.41668e-06	470.2	7.69305e-06	497.818	2.16506e-05	489.513	5.36108e-06	496.136	0.00214709	514.382	4.65211e-08	496.033	2.36131e-07	477.532	0.00117894	487.794	0.00117296	480.697	6.06958e-08	489.579	8.1185e-07	475.476	2.79523e-06	477.139	5.70113e-06	480.697	6.06958e-08	489.579	8.1185e-07	480.505	8.17618e-06
468.499	2.37827e-07	490.918	1.13781e-06	503.068	1.18186e-07	477.426	5.1207e-06	469.139	4.55462e-06	503.005	1.22536e-07	485.773	4.11047e-05	501.159	0.00962753	486.404	2.06529e-06	497.456	4.07349e-06	470.484	7.04361e-06	498.113	1.99863e-05	489.814	4.89666e-06	496.438	0.00206	514.665	4.2632e-08	496.321	2.14333e-07	477.82	0.00111974	488.059	0.00109238	481.008	5.71611e-08	489.882	7.48794e-07	475.765	2.55135e-06	477.426	5.1207e-06	481.008	5.71611e-08	489.882	7.48794e-07	480.809	7.50238e-06
468.799	2.18746e-07	491.201	1.0351e-06	503.351	1.10049e-07	477.714	4.59715e-06	469.427	4.08093e-06	503.283	1.30206e-07	486.059	3.73093e-05	501.416	0.00912338	486.7	1.9062e-06	497.754	3.75924e-06	470.767	6.44704e-06	498.408	1.84419e-05	490.114	4.47233e-06	496.741	0.00197533	514.948	3.908e-08	496.609	1.95607e-07	478.109	0.00106297	488.324	0.0010169	481.318	5.45872e-08	490.185	6.90399e-07	476.054	2.32984e-06	477.714	4.59715e-06	481.318	5.45872e-08	490.185	6.90399e-07	481.112	6.88341e-06
469.098	2.02269e-07	491.485	9.42069e-07	503.635	1.03511e-07	478.001	4.12516e-06	469.715	3.65469e-06	503.562	1.39326e-07	486.344	3.38475e-05	501.673	0.00864222	486.997	1.76103e-06	498.052	3.47216e-06	471.051	5.89946e-06	498.703	1.70099e-05	490.415	4.0851e-06	497.043	0.00189307	515.231	3.58415e-08	496.897	1.79692e-07	478.397	0.00100857	488.588	0.00094623	481.629	5.29317e-08	490.488	6.36336e-07	476.344	2.12902e-06	478.001	4.12516e-06	481.629	5.29317e-08	490.488	6.36336e-07	481.416	6.31553e-06
469.398	1.88234e-07	491.768	8.57934e-07	503.919	9.84723e-08	478.288	3.69991e-06	470.003	3.27136e-06	503.841	1.49965e-07	486.629	3.06918e-05	501.93	0.00818323	487.293	1.62894e-06	498.349	3.21064e-06	471.335	5.39723e-06	498.998	1.5683e-05	490.715	3.73225e-06	497.346	0.00181322	515.514	3.28946e-08	497.185	1.66366e-07	478.686	0.000956466	488.853	0.000880093	481.94	5.2166e-08	490.791	5.86298e-07	476.633	1.94734e-06	478.288	3.69991e-06	481.94	5.2166e-08	490.791	5.86298e-07	481.719	5.79527e-06
469.698	1.76502e-07	492.052	7.81976e-07	504.202	9.48527e-08	478.575	3.31696e-06	470.29	2.92681e-06	504.12	1.62203e-07	486.915	2.78165e-05	502.187	0.00774556	487.589	1.50918e-06	498.647	2.97319e-06	471.619	4.93699e-06	499.293	1.44545e-05	491.016	3.41123e-06	497.648	0.00173577	515.798	3.02197e-08	497.473	1.55434e-07	478.974	0.000906595	489.118	0.000818227	482.25	5.22743e-08	491.094	5.39998e-07	476.923	1.7834e-06	478.575	3.31696e-06	482.25	5.22743e-08	491.094	5.39998e-07	482.023	5.31939e-06
469.998	1.66956e-07	492.335	7.13542e-07	504.486	9.25891e-08	478.863	2.97232e-06	470.578	2.61727e-06	504.398	1.76137e-07	487.2	2.51981e-05	502.443	0.00732842	487.885	1.40105e-06	498.945	2.75847e-06	471.902	4.51563e-06	499.589	1.33181e-05	491.316	3.11972e-06	497.951	0.00166068	516.081	2.77989e-08	497.761	1.46735e-07	479.263	0.000858888	489.383	0.000760384	482.561	5.32534e-08	491.397	4.9717e-07	477.212	1.6359e-06	478.863	2.97232e-06	482.561	5.32534e-08	491.397	4.9717e-07	482.326	4.88493e-06
470.298	1.59505e-07	492.619	6.52038e-07	504.77	9.16356e-08	479.15	2.66233e-06	470.866	2.33934e-06	504.677	1.91879e-07	487.485	2.28149e-05	502.7	0.00693103	488.182	1.30393e-06	499.243	2.56526e-06	472.186	4.13024e-06	499.884	1.22677e-05	491.617	2.8556e-06	498.253	0.00158795	516.364	2.56159e-08	498.049	1.40132e-07	479.551	0.000813278	489.647	0.000706327	482.871	5.51128e-08	491.701	4.57565e-07	477.502	1.50368e-06	479.15	2.66233e-06	482.871	5.51128e-08	491.701	4.57565e-07	482.63	4.48912e-06
470.598	1.54077e-07	492.902	5.96925e-07	505.053	9.19624e-08	479.437	2.38367e-06	471.154	2.08993e-06	504.956	2.09556e-07	487.771	2.06469e-05	502.957	0.00655261	488.478	1.21725e-06	499.54	2.39244e-06	472.47	3.77817e-06	500.179	1.12979e-05	491.917	2.6169e-06	498.556	0.00151755	516.647	2.36563e-08	498.337	1.35517e-07	479.84	0.000769699	489.912	0.000655832	483.182	5.78747e-08	492.004	4.20953e-07	477.791	1.38568e-06	479.437	2.38367e-06	483.182	5.78747e-08	492.004	4.20953e-07	482.933	4.12942e-06
470.898	1.50623e-07	493.186	5.47716e-07	505.337	9.3555e-08	479.725	2.13333e-06	471.442	1.86625e-06	505.235	2.29311e-07	488.056	1.86758e-05	503.214	0.00619244	488.774	1.14052e-06	499.838	2.23906e-06	472.753	3.45692e-06	500.474	1.04034e-05	492.218	2.40185e-06	498.858	0.00144945	516.93	2.19072e-08	498.625	1.32804e-07	480.128	0.000728085	490.177	0.000608686	483.492	6.1574e-08	492.307	3.8712e-07	478.08	1.28096e-06	479.725	2.13333e-06	483.492	6.1574e-08	492.307	3.8712e-07	483.237	3.80352e-06
471.198	1.49114e-07	493.469	5.03973e-07	505.621	9.64144e-08	480.012	1.90857e-06	471.73	1.66574e-06	505.513	2.51305e-07	488.341	1.68846e-05	503.471	0.00584977	489.07	1.0733e-06	500.136	2.10423e-06	473.037	3.16423e-06	500.769	9.57921e-06	492.518	2.20883e-06	499.16	0.00138363	517.213	2.03574e-08	498.913	1.31931e-07	480.417	0.00068837	490.442	0.000564687	483.803	6.62584e-08	492.61	3.55865e-07	478.37	1.18866e-06	480.012	1.90857e-06	483.803	6.62584e-08	492.61	3.55865e-07	483.54	3.50928e-06
471.497	1.49543e-07	493.753	4.65301e-07	505.905	1.00556e-07	480.299	1.70693e-06	472.018	1.48611e-06	505.792	2.75715e-07	488.627	1.52578e-05	503.727	0.0055239	489.366	1.01521e-06	500.434	1.98723e-06	473.321	2.89799e-06	501.064	8.82082e-06	492.819	2.03638e-06	499.463	0.00132006	517.496	1.89971e-08	499.201	1.32859e-07	480.705	0.000650491	490.706	0.000523646	484.113	7.19895e-08	492.913	3.27001e-07	478.659	1.10803e-06	480.299	1.70693e-06	484.113	7.19895e-08	492.913	3.27001e-07	483.844	3.24477e-06
471.797	1.51923e-07	494.036	4.3135e-07	506.188	1.06011e-07	480.587	1.52613e-06	472.306	1.32528e-06	506.071	3.02739e-07	488.912	1.37811e-05	503.984	0.00521416	489.663	9.65944e-07	500.731	1.88743e-06	473.605	2.65626e-06	501.36	8.12395e-06	493.119	1.88318e-06	499.765	0.0012587	517.779	1.7818e-08	499.489	1.35568e-07	480.994	0.000614383	490.971	0.000485379	484.424	7.8843e-08	493.216	3.00356e-07	478.949	1.03841e-06	480.587	1.52613e-06	484.424	7.8843e-08	493.216	3.00356e-07	484.147	3.00826e-06
472.097	1.56289e-07	494.32	4.01808e-07	506.472	1.12824e-07	480.874	1.36416e-06	472.594	1.18138e-06	506.35	3.32593e-07	489.197	1.24413e-05	504.241	0.00491987	489.959	9.25239e-07	501.029	1.80432e-06	473.888	2.43728e-06	501.655	7.48461e-06	493.42	1.74807e-06	500.068	0.00119952	518.062	1.68134e-08	499.777	1.40061e-07	481.282	0.000579984	491.236	0.000449718	484.734	8.69093e-08	493.519	2.75769e-07	479.238	9.79211e-07	480.874	1.36416e-06	484.734	8.69093e-08	493.519	2.75769e-07	484.451	2.79818e-06
472.397	1.62696e-07	494.603	3.76399e-07	506.756	1.21056e-07	481.161	1.21917e-06	472.882	1.0527e-06	506.628	3.65517e-07	489.482	1.12265e-05	504.498	0.00464038	490.255	8.92899e-07	501.327	1.7375e-06	474.172	2.2394e-06	501.95	6.89913e-06	493.72	1.63001e-06	500.37	0.00114247	518.345	1.59782e-08	500.065	1.4636e-07	481.571	0.000547233	491.501	0.0004165	485.045	9.62948e-08	493.822	2.53088e-07	479.528	9.29948e-07	481.161	1.21917e-06	485.045	9.62948e-08	493.822	2.53088e-07	484.754	2.61313e-06
472.697	1.71224e-07	494.887	3.54883e-07	507.039	1.30783e-07	481.448	1.08949e-06	473.17	9.37705e-07	506.907	4.01771e-07	489.768	1.01255e-05	504.755	0.00437509	490.551	8.68788e-07	501.625	1.6867e-06	474.456	2.06117e-06	502.245	6.36408e-06	494.021	1.52809e-06	500.673	0.00108753	518.628	1.53086e-08	500.353	1.54507e-07	481.859	0.000516069	491.765	0.000385572	485.355	1.07123e-07	494.126	2.32175e-07	479.817	8.90205e-07	481.448	1.08949e-06	485.355	1.07123e-07	494.126	2.32175e-07	485.058	2.45191e-06
472.997	1.81972e-07	495.17	3.37055e-07	507.323	1.42096e-07	481.736	9.7361e-07	473.458	8.35014e-07	507.186	4.41641e-07	490.053	9.12824e-06	505.011	0.00412336	490.848	8.52829e-07	501.923	1.65174e-06	474.739	1.90121e-06	502.54	5.87631e-06	494.322	1.44153e-06	500.975	0.00103464	518.911	1.48023e-08	500.641	1.64565e-07	482.148	0.000486432	492.03	0.000356789	485.666	1.19535e-07	494.429	2.129e-07	480.106	8.59647e-07	481.736	9.7361e-07	485.666	1.19535e-07	494.429	2.129e-07	485.361	2.31345e-06
473.297	1.95068e-07	495.454	3.22738e-07	507.607	1.55103e-07	482.023	8.70181e-07	473.746	7.43377e-07	507.465	4.85437e-07	490.338	8.22549e-06	505.268	0.00388463	491.144	8.45003e-07	502.22	1.63258e-06	475.023	1.7583e-06	502.836	5.43291e-06	494.622	1.36967e-06	501.278	0.000983774	519.194	1.44588e-08	500.929	1.76617e-07	482.436	0.000458263	492.295	0.000330017	485.976	1.33694e-07	494.732	1.95142e-07	480.396	8.38014e-07	482.023	8.70181e-07	485.976	1.33694e-07	494.732	1.95142e-07	485.665	2.19688e-06
473.596	2.10659e-07	495.737	3.11789e-07	507.89	1.69929e-07	482.31	7.77974e-07	474.034	6.61669e-07	507.743	5.33497e-07	490.624	7.40872e-06	505.525	0.00365832	491.44	8.45355e-07	502.518	1.62928e-06	475.307	1.63135e-06	503.131	5.03122e-06	494.923	1.31197e-06	501.58	0.00093488	519.477	1.4279e-08	501.217	1.90767e-07	482.725	0.000431507	492.56	0.000305125	486.287	1.4978e-07	495.035	1.78788e-07	480.685	8.25117e-07	482.31	7.77974e-07	486.287	1.4978e-07	495.035	1.78788e-07	485.968	2.10145e-06
473.896	2.28924e-07	496.021	3.0409e-07	508.174	1.86717e-07	482.598	6.95884e-07	474.321	5.88876e-07	508.022	5.8619e-07	490.909	6.67019e-06	505.782	0.00344388	491.736	8.5399e-07	502.816	1.64206e-06	475.591	1.51935e-06	503.426	4.66881e-06	495.223	1.26799e-06	501.883	0.000887917	519.761	1.42654e-08	501.505	2.07139e-07	483.014	0.000406106	492.824	0.000281993	486.597	1.68001e-07	495.338	1.63734e-07	480.975	8.20845e-07	482.598	6.95884e-07	486.597	1.68001e-07	495.338	1.63734e-07	486.272	2.02659e-06
474.196	2.50065e-07	496.304	2.99555e-07	508.458	2.05629e-07	482.885	6.22919e-07	474.609	5.24087e-07	508.301	6.43915e-07	491.194	6.00279e-06	506.039	0.00324078	492.032	8.71079e-07	503.114	1.67121e-06	475.874	1.42143e-06	503.721	4.34346e-06	495.524	1.23743e-06	502.185	0.000842838	520.044	1.44225e-08	501.793	2.25879e-07	483.302	0.000382007	493.089	0.000260507	486.908	1.88587e-07	495.641	1.49883e-07	481.264	8.25156e-07	482.885	6.22919e-07	486.908	1.88587e-07	495.641	1.49883e-07	486.575	1.97188e-06
474.496	2.74317e-07	496.587	2.9812e-07	508.742	2.26848e-07	483.172	5.58186e-07	474.897	4.66483e-07	508.58	7.07102e-07	491.48	5.40004e-06	506.295	0.00304852	492.329	8.96857e-07	503.411	1.71719e-06	476.158	1.33679e-06	504.016	4.05319e-06	495.824	1.22009e-06	502.488	0.000799597	520.327	1.47563e-08	502.081	2.47158e-07	483.591	0.000359156	493.354	0.000240558	487.218	2.11799e-07	495.944	1.37145e-07	481.554	8.38079e-07	483.172	5.58186e-07	487.218	2.11799e-07	495.944	1.37145e-07	486.879	1.93707e-06
474.796	3.01946e-07	496.871	2.99753e-07	509.025	2.50577e-07	483.46	5.00885e-07	475.185	4.15328e-07	508.858	7.76222e-07	491.765	4.85602e-06	506.552	0.00286658	492.625	9.31629e-07	503.709	1.78059e-06	476.442	1.26475e-06	504.311	3.79621e-06	496.125	1.21588e-06	502.79	0.000758147	520.61	1.52749e-08	502.369	2.71167e-07	483.879	0.0003375	493.619	0.000222047	487.529	2.37924e-07	496.247	1.25436e-07	481.843	8.59716e-07	483.46	5.00885e-07	487.529	2.37924e-07	496.247	1.25436e-07	487.182	1.92204e-06
475.096	3.33251e-07	497.154	3.04443e-07	509.309	2.77044e-07	483.747	4.50301e-07	475.473	3.69962e-07	509.137	8.5178e-07	492.05	4.36533e-06	506.809	0.00269451	492.921	9.7577e-07	504.007	1.8621e-06	476.726	1.20472e-06	504.607	3.57096e-06	496.425	1.22482e-06	503.092	0.000718441	520.893	1.59884e-08	502.657	2.98125e-07	484.168	0.000316991	493.883	0.000204878	487.839	2.67286e-07	496.55	1.14678e-07	482.132	8.90243e-07	483.747	4.50301e-07	487.839	2.67286e-07	496.55	1.14678e-07	487.486	1.92686e-06
475.396	3.68569e-07	497.438	3.12208e-07	509.593	3.06499e-07	484.034	4.05791e-07	475.761	3.29794e-07	509.416	9.34324e-07	492.335	3.92305e-06	507.066	0.00253184	493.217	1.02973e-06	504.305	1.96262e-06	477.009	1.15619e-06	504.902	3.37604e-06	496.726	1.24704e-06	503.395	0.000680432	521.176	1.69091e-08	502.945	3.28277e-07	484.456	0.000297577	494.148	0.000188961	488.15	3.00243e-07	496.854	1.048e-07	482.422	9.29906e-07	484.034	4.05791e-07	488.15	3.00243e-07	496.854	1.048e-07	487.789	1.95173e-06
475.695	4.08274e-07	497.721	3.23088e-07	509.876	3.3922e-07	484.321	3.66787e-07	476.049	2.94296e-07	509.695	1.02444e-06	492.621	3.52468e-06	507.323	0.00237813	493.514	1.09403e-06	504.602	2.08313e-06	477.293	1.11875e-06	505.197	3.21028e-06	497.026	1.28281e-06	503.697	0.00064407	521.459	1.80518e-08	503.233	3.61894e-07	484.745	0.000279211	494.413	0.000174212	488.46	3.37193e-07	497.157	9.57338e-08	482.711	9.79028e-07	484.321	3.66787e-07	488.46	3.37193e-07	497.157	9.57338e-08	488.093	1.99703e-06
475.995	4.52785e-07	498.005	3.37151e-07	510.16	3.75514e-07	484.609	3.3278e-07	476.337	2.62996e-07	509.973	1.12278e-06	492.906	3.16614e-06	507.579	0.00223295	493.81	1.16928e-06	504.9	2.22483e-06	477.577	1.09207e-06	505.492	3.07268e-06	497.327	1.33248e-06	504	0.000609308	521.742	1.94335e-08	503.521	3.99281e-07	485.033	0.000261848	494.678	0.000160553	488.771	3.78579e-07	497.46	8.74179e-08	483.001	1.03801e-06	484.609	3.3278e-07	488.771	3.78579e-07	497.46	8.74179e-08	488.396	2.0633e-06
476.295	5.02565e-07	498.288	3.5449e-07	510.444	4.15717e-07	484.896	3.03321e-07	476.625	2.35473e-07	510.252	1.23002e-06	493.191	2.84371e-06	507.836	0.0020959	494.106	1.25617e-06	505.198	2.38906e-06	477.86	1.07589e-06	505.787	2.96245e-06	497.627	1.39653e-06	504.302	0.000576098	522.025	2.10742e-08	503.809	4.4077e-07	485.322	0.000245442	494.942	0.000147909	489.082	4.24889e-07	497.763	7.9795e-08	483.29	1.10732e-06	484.896	3.03321e-07	489.082	4.24889e-07	497.763	7.9795e-08	488.7	2.15125e-06
476.595	5.58128e-07	498.572	3.75221e-07	510.727	4.60199e-07	485.183	2.78015e-07	476.913	2.11351e-07	510.531	1.34689e-06	493.477	2.55402e-06	508.093	0.00196659	494.402	1.35549e-06	505.496	2.57733e-06	478.144	1.07004e-06	506.082	2.87895e-06	497.928	1.47559e-06	504.605	0.000544391	522.308	2.29968e-08	504.097	4.8673e-07	485.61	0.000229948	495.207	0.000136211	489.392	4.76666e-07	498.066	7.28118e-08	483.58	1.18753e-06	485.183	2.78015e-07	489.392	4.76666e-07	498.066	7.28118e-08	489.003	2.26179e-06
476.895	6.20039e-07	498.855	3.9949e-07	511.011	5.09366e-07	485.471	2.56513e-07	477.201	1.903e-07	510.809	1.47421e-06	493.762	2.294e-06	508.35	0.00184463	494.699	1.46812e-06	505.793	2.79136e-06	478.428	1.07444e-06	506.378	2.82175e-06	498.228	1.57038e-06	504.907	0.000514139	522.591	2.52276e-08	504.385	5.37565e-07	485.899	0.000215327	495.472	0.000125394	489.703	5.34508e-07	498.369	6.64191e-08	483.869	1.27927e-06	485.471	2.56513e-07	489.703	5.34508e-07	498.369	6.64191e-08	489.307	2.39598e-06
477.195	6.88923e-07	499.139	4.27467e-07	511.295	5.63661e-07	485.758	2.38514e-07	477.489	1.72024e-07	511.088	1.61282e-06	494.047	2.06086e-06	508.607	0.00172967	494.995	1.59502e-06	506.091	3.03306e-06	478.712	1.08906e-06	506.673	2.79061e-06	498.529	1.68177e-06	505.21	0.000485296	522.874	2.77962e-08	504.673	5.9372e-07	486.187	0.000201535	495.737	0.000115397	490.013	5.99075e-07	498.672	6.05717e-08	484.158	1.38328e-06	485.758	2.38514e-07	490.013	5.99075e-07	498.672	6.05717e-08	489.61	2.55509e-06
477.495	7.65467e-07	499.422	4.59352e-07	511.578	6.23569e-07	486.045	2.23755e-07	477.777	1.56265e-07	511.367	1.76365e-06	494.333	1.85207e-06	508.863	0.00162137	495.291	1.7373e-06	506.389	3.30454e-06	478.995	1.11397e-06	506.968	2.78545e-06	498.83	1.81076e-06	505.512	0.000457812	523.157	3.07363e-08	504.961	6.55678e-07	486.476	0.000188535	496.001	0.000106163	490.324	6.71098e-07	498.975	5.52275e-08	484.448	1.50039e-06	486.045	2.23755e-07	490.324	6.71098e-07	498.975	5.52275e-08	489.914	2.7406e-06
477.794	8.50426e-07	499.706	4.95369e-07	511.862	6.89621e-07	486.333	2.12012e-07	478.064	1.42796e-07	511.646	1.92769e-06	494.618	1.66535e-06	509.12	0.00151938	495.587	1.89614e-06	506.687	3.60815e-06	479.279	1.14931e-06	507.263	2.8064e-06	499.13	1.95851e-06	505.815	0.000431641	523.441	3.40856e-08	505.249	7.23971e-07	486.764	0.000176287	496.266	9.76392e-05	490.634	7.5138e-07	499.278	5.0348e-08	484.737	1.6315e-06	486.333	2.12012e-07	490.634	7.5138e-07	499.278	5.0348e-08	490.217	2.95418e-06
478.094	9.44628e-07	499.989	5.35776e-07	512.146	7.62392e-07	486.62	2.03097e-07	478.352	1.31417e-07	511.924	2.10601e-06	494.903	1.49863e-06	509.377	0.0014234	495.883	2.07288e-06	506.984	3.94647e-06	479.563	1.19529e-06	507.558	2.85375e-06	499.431	2.12631e-06	506.117	0.000406738	523.724	3.78867e-08	505.537	7.99177e-07	487.053	0.000164756	496.531	8.97746e-05	490.945	8.40807e-07	499.582	4.58976e-08	485.027	1.77765e-06	486.62	2.03097e-07	490.945	8.40807e-07	499.582	4.58976e-08	490.521	3.19774e-06
478.394	1.04898e-06	500.273	5.80859e-07	512.43	8.42514e-07	486.907	1.96853e-07	478.64	1.21959e-07	512.203	2.29973e-06	495.189	1.35005e-06	509.634	0.00133311	496.18	2.26895e-06	507.282	4.32236e-06	479.846	1.2522e-06	507.854	2.92802e-06	499.731	2.31563e-06	506.42	0.000383055	524.007	4.21871e-08	505.825	8.81926e-07	487.341	0.000153906	496.796	8.25232e-05	491.255	9.40354e-07	499.885	4.18437e-08	485.316	1.93997e-06	486.907	1.96853e-07	491.255	9.40354e-07	499.885	4.18437e-08	490.824	3.47341e-06
478.694	1.16448e-06	500.556	6.30937e-07	512.713	9.30672e-07	487.195	1.93156e-07	478.928	1.14272e-07	512.482	2.51009e-06	495.474	1.2179e-06	509.891	0.00124824	496.476	2.48595e-06	507.58	4.73892e-06	480.13	1.32042e-06	508.149	3.02989e-06	500.032	2.52809e-06	506.722	0.000360548	524.29	4.704e-08	506.113	9.72903e-07	487.63	0.000143704	497.06	7.58416e-05	491.566	1.05109e-06	500.188	3.81562e-08	485.606	2.1197e-06	487.195	1.93156e-07	491.566	1.05109e-06	500.188	3.81562e-08	491.128	3.78358e-06
478.994	1.29221e-06	500.84	6.8636e-07	512.997	1.02761e-06	487.482	1.91908e-07	479.216	1.08232e-07	512.761	2.73839e-06	495.759	1.10069e-06	510.147	0.0011685	496.772	2.72561e-06	507.878	5.19956e-06	480.414	1.4004e-06	508.444	3.16024e-06	500.332	2.76551e-06	507.024	0.000339172	524.573	5.25048e-08	506.401	1.07285e-06	487.918	0.000134116	497.325	6.96891e-05	491.876	1.1742e-06	500.491	3.4808e-08	485.895	2.3182e-06	487.482	1.91908e-07	491.876	1.1742e-06	500.491	3.4808e-08	491.431	4.1309e-06
479.294	1.43336e-06	501.123	7.47517e-07	513.281	1.13415e-06	487.769	1.93041e-07	479.504	1.03735e-07	513.039	2.98604e-06	496.044	9.97031e-07	510.404	0.00109363	497.068	2.98982e-06	508.175	5.70799e-06	480.698	1.49267e-06	508.739	3.32019e-06	500.633	3.02987e-06	507.327	0.000318884	524.856	5.86474e-08	506.689	1.18259e-06	488.207	0.000125112	497.59	6.40279e-05	492.187	1.31097e-06	500.794	3.1774e-08	486.184	2.53696e-06	487.769	1.93041e-07	492.187	1.31097e-06	500.794	3.1774e-08	491.735	4.51828e-06
479.594	1.58923e-06	501.407	8.14829e-07	513.564	1.25115e-06	488.056	1.9651e-07	479.792	1.00695e-07	513.318	3.25454e-06	496.33	9.05707e-07	510.661	0.00102337	497.365	3.28064e-06	508.473	6.26828e-06	480.981	1.59785e-06	509.034	3.51102e-06	500.933	3.32339e-06	507.629	0.000299641	525.139	6.55414e-08	506.977	1.30299e-06	488.495	0.000116661	497.855	5.88228e-05	492.497	1.46282e-06	501.097	2.90316e-08	486.474	2.77761e-06	488.056	1.9651e-07	492.497	1.46282e-06	501.097	2.90316e-08	492.038	4.94895e-06
479.893	1.76123e-06	501.69	8.8876e-07	513.848	1.37959e-06	488.344	2.02296e-07	480.08	9.90451e-08	513.597	3.54549e-06	496.615	8.25616e-07	510.918	0.000957495	497.661	3.60031e-06	508.771	6.88481e-06	481.265	1.71664e-06	509.329	3.73428e-06	501.234	3.64847e-06	507.932	0.0002814	525.422	7.32681e-08	507.265	1.435e-06	488.784	0.000108735	498.119	5.40411e-05	492.808	1.6313e-06	501.4	2.65604e-08	486.763	3.04191e-06	488.344	2.02296e-07	492.808	1.6313e-06	501.4	2.65604e-08	492.342	5.42644e-06
480.193	1.95089e-06	501.974	9.69812e-07	514.132	1.5205e-06	488.631	2.10405e-07	480.368	9.87358e-08	513.876	3.86061e-06	496.9	7.55779e-07	511.175	0.000895768	497.957	3.95124e-06	509.069	7.56237e-06	481.549	1.84984e-06	509.625	3.99171e-06	501.534	4.00776e-06	508.234	0.000264121	525.705	8.19182e-08	507.553	1.57965e-06	489.073	0.000101306	498.384	4.96521e-05	493.118	1.81813e-06	501.703	2.4342e-08	487.053	3.3318e-06	488.631	2.10405e-07	493.118	1.81813e-06	501.703	2.4342e-08	492.645	5.95463e-06
480.493	2.15991e-06	502.257	1.05853e-06	514.415	1.67501e-06	488.918	2.20865e-07	480.656	9.97324e-08	514.154	4.20174e-06	497.186	6.95323e-07	511.431	0.000837973	498.253	4.33606e-06	509.366	8.30615e-06	481.832	1.99833e-06	509.92	4.28531e-06	501.835	4.40414e-06	508.537	0.000247764	525.988	9.15918e-08	507.841	1.73807e-06	489.361	9.43477e-05	498.649	4.56276e-05	493.429	2.02516e-06	502.006	2.23602e-08	487.342	3.64934e-06	488.918	2.20865e-07	493.429	2.02516e-06	502.006	2.23602e-08	492.949	6.53773e-06
480.793	2.39011e-06	502.54	1.15551e-06	514.699	1.84432e-06	489.206	2.33726e-07	480.944	1.02016e-07	514.433	4.57083e-06	497.471	6.43472e-07	511.688	0.000783903	498.55	4.75761e-06	509.664	9.12176e-06	482.116	2.1631e-06	510.215	4.61731e-06	502.135	4.84077e-06	508.839	0.000232288	526.271	1.024e-07	508.129	1.91146e-06	489.65	8.78356e-05	498.914	4.19413e-05	493.739	2.25443e-06	502.31	2.06005e-08	487.632	3.9968e-06	489.206	2.33726e-07	493.739	2.25443e-06	502.31	2.06005e-08	493.252	7.18035e-06
481.093	2.64347e-06	502.824	1.26138e-06	514.983	2.02977e-06	489.493	2.49064e-07	481.232	1.05582e-07	514.712	4.96997e-06	497.756	5.99544e-07	511.945	0.000733364	498.846	5.21897e-06	509.962	1.00153e-05	482.4	2.34522e-06	510.51	4.99022e-06	502.436	5.32104e-06	509.142	0.000217657	526.554	1.14465e-07	508.417	2.10112e-06	489.938	8.17454e-05	499.178	3.85688e-05	494.05	2.50818e-06	502.613	1.90504e-08	487.921	4.3766e-06	489.493	2.49064e-07	494.05	2.50818e-06	502.613	1.90504e-08	493.556	7.88749e-06
481.393	2.92215e-06	503.107	1.37684e-06	515.267	2.23278e-06	489.78	2.66972e-07	481.52	1.10441e-07	514.991	5.40137e-06	498.042	5.62939e-07	512.202	0.00068617	499.142	5.72345e-06	510.26	1.09933e-05	482.684	2.5459e-06	510.805	5.4068e-06	502.736	5.8487e-06	509.444	0.000203833	526.837	1.27924e-07	508.705	2.30846e-06	490.227	7.60542e-05	499.443	3.54874e-05	494.36	2.78884e-06	502.916	1.76994e-08	488.21	4.79139e-06	489.78	2.66972e-07	494.36	2.78884e-06	502.916	1.76994e-08	493.859	8.66459e-06
481.693	3.22849e-06	503.391	1.50263e-06	515.55	2.4549e-06	490.068	2.87571e-07	481.808	1.16617e-07	515.269	5.86743e-06	498.327	5.33132e-07	512.459	0.000642145	499.438	6.27461e-06	510.557	1.20628e-05	482.967	2.76642e-06	511.1	5.87011e-06	503.037	6.42775e-06	509.747	0.000190779	527.12	1.42925e-07	508.993	2.535e-06	490.515	7.07403e-05	499.708	3.26762e-05	494.671	3.09908e-06	503.219	1.65384e-08	488.5	5.24399e-06	490.068	2.87571e-07	494.671	3.09908e-06	503.219	1.65384e-08	494.163	9.51754e-06
481.992	3.56503e-06	503.674	1.63956e-06	515.834	2.69779e-06	490.355	3.11002e-07	482.095	1.24147e-07	515.548	6.37064e-06	498.612	5.09672e-07	512.715	0.000601122	499.734	6.87632e-06	510.855	1.32316e-05	483.251	3.0082e-06	511.396	6.38352e-06	503.338	7.06257e-06	510.049	0.00017846	527.404	1.59634e-07	509.281	2.78239e-06	490.804	6.57832e-05	499.972	3.01158e-05	494.981	3.44178e-06	503.522	1.55607e-08	488.789	5.73745e-06	490.355	3.11002e-07	494.981	3.44178e-06	503.522	1.55607e-08	494.466	1.04527e-05
482.292	3.93453e-06	503.958	1.78847e-06	516.118	2.96326e-06	490.642	3.3743e-07	482.383	1.33081e-07	515.827	6.91371e-06	498.898	4.92173e-07	512.972	0.000562944	500.031	7.53272e-06	511.153	1.45078e-05	483.535	3.27278e-06	511.691	6.95069e-06	503.638	7.75788e-06	510.352	0.000166844	527.687	1.78233e-07	509.569	3.05239e-06	491.092	6.11631e-05	500.237	2.77884e-05	495.292	3.82011e-06	503.825	1.47608e-08	489.079	6.27507e-06	490.642	3.3743e-07	495.292	3.82011e-06	503.825	1.47608e-08	494.77	1.1477e-05
482.592	4.33996e-06	504.241	1.9503e-06	516.401	3.25325e-06	490.929	3.67043e-07	482.671	1.43487e-07	516.106	7.49949e-06	499.183	4.80308e-07	513.229	0.000527464	500.327	8.24827e-06	511.451	1.59003e-05	483.819	3.56182e-06	511.986	7.57564e-06	503.939	8.51877e-06	510.654	0.000155895	527.97	1.98924e-07	509.857	3.34691e-06	491.381	5.68615e-05	500.502	2.56776e-05	495.602	4.23752e-06	504.128	1.41354e-08	489.368	6.86037e-06	490.929	3.67043e-07	495.602	4.23752e-06	504.128	1.41354e-08	495.073	1.25979e-05
482.892	4.78457e-06	504.525	2.12604e-06	516.685	3.56986e-06	491.217	4.00055e-07	482.959	1.55441e-07	516.384	8.131e-06	499.468	4.73809e-07	513.486	0.000494541	500.623	9.02776e-06	511.748	1.74187e-05	484.102	3.87711e-06	512.281	8.26273e-06	504.239	9.35075e-06	510.956	0.000145584	528.253	2.21927e-07	510.145	3.66799e-06	491.669	5.28607e-05	500.767	2.3768e-05	495.913	4.69775e-06	504.431	1.36831e-08	489.658	7.49715e-06	491.217	4.00055e-07	495.913	4.69775e-06	504.431	1.36831e-08	495.377	1.38234e-05
483.192	5.27184e-06	504.808	2.31674e-06	516.969	3.91535e-06	491.504	4.36705e-07	483.247	1.69038e-07	516.663	8.81148e-06	499.753	4.7246e-07	513.743	0.000464043	500.919	9.87633e-06	512.046	1.90731e-05	484.386	4.22061e-06	512.576	9.01671e-06	504.54	1.02598e-05	511.259	0.000135878	528.536	2.47485e-07	510.433	4.01783e-06	491.958	4.9144e-05	501.031	2.20458e-05	496.223	5.20487e-06	504.734	1.34042e-08	489.947	8.18947e-06	491.504	4.36705e-07	496.223	5.20487e-06	504.734	1.34042e-08	495.68	1.51622e-05
483.492	5.80555e-06	505.092	2.52355e-06	517.252	4.29215e-06	491.791	4.77257e-07	483.535	1.84384e-07	516.942	9.54434e-06	500.039	4.76095e-07	513.999	0.000435847	501.216	1.07995e-05	512.344	2.08747e-05	484.67	4.59439e-06	512.872	9.8427e-06	504.84	1.12522e-05	511.561	0.000126748	528.819	2.75867e-07	510.721	4.39882e-06	492.246	4.56959e-05	501.296	2.04982e-05	496.534	5.76332e-06	505.038	1.33012e-08	490.236	8.94171e-06	491.791	4.77257e-07	496.534	5.76332e-06	505.038	1.33012e-08	495.984	1.66235e-05
483.792	6.38978e-06	505.375	2.74767e-06	517.536	4.70289e-06	492.079	5.22005e-07	483.823	2.01604e-07	517.221	1.03332e-05	500.324	4.84595e-07	514.256	0.000409837	501.512	1.18032e-05	512.642	2.28351e-05	484.953	5.00069e-06	513.167	1.07463e-05	505.141	1.23349e-05	511.864	0.000118165	529.102	3.07367e-07	511.009	4.81348e-06	492.535	4.25013e-05	501.561	1.91135e-05	496.845	6.37789e-06	505.341	1.33786e-08	490.526	9.75852e-06	492.079	5.22005e-07	496.845	6.37789e-06	505.341	1.33786e-08	496.287	1.82175e-05
484.091	7.02893e-06	505.659	2.99042e-06	517.82	5.15039e-06	492.366	5.71271e-07	484.111	2.20834e-07	517.499	1.11819e-05	500.609	4.97884e-07	514.513	0.000385905	501.808	1.28937e-05	512.939	2.49671e-05	485.237	5.44193e-06	513.462	1.17334e-05	505.441	1.35153e-05	512.166	0.000110101	529.385	3.42308e-07	511.296	5.26455e-06	492.823	3.95464e-05	501.826	1.78809e-05	497.155	7.05381e-06	505.644	1.36433e-08	490.815	1.06449e-05	492.366	5.71271e-07	497.155	7.05381e-06	505.644	1.36433e-08	496.591	1.99549e-05
484.391	7.72774e-06	505.942	3.25318e-06	518.103	5.63768e-06	492.653	6.25406e-07	484.399	2.42231e-07	517.778	1.20946e-05	500.895	5.15931e-07	514.77	0.000363949	502.104	1.40779e-05	513.237	2.72842e-05	485.521	5.92069e-06	513.757	1.28105e-05	505.742	1.48013e-05	512.469	0.000102531	529.668	3.81044e-07	511.584	5.75495e-06	493.112	3.6818e-05	502.09	1.67907e-05	497.466	7.79673e-06	505.947	1.41043e-08	491.105	1.16063e-05	492.653	6.25406e-07	497.466	7.79673e-06	505.947	1.41043e-08	496.894	2.18473e-05
484.691	8.49135e-06	506.226	3.53742e-06	518.387	6.16801e-06	492.941	6.84796e-07	484.687	2.65966e-07	518.057	1.30755e-05	501.18	5.38743e-07	515.027	0.000343874	502.401	1.53629e-05	513.535	2.9801e-05	485.805	6.43973e-06	514.052	1.39845e-05	506.042	1.62015e-05	512.771	9.54278e-05	529.951	4.23966e-07	511.872	6.28784e-06	493.4	3.43039e-05	502.355	1.58341e-05	497.776	8.61278e-06	506.25	1.47735e-08	491.394	1.26482e-05	492.941	6.84796e-07	497.776	8.61278e-06	506.25	1.47735e-08	497.198	2.3907e-05
484.991	9.32527e-06	506.509	3.84474e-06	518.671	6.7449e-06	493.228	7.49859e-07	484.975	2.92229e-07	518.336	1.41291e-05	501.465	5.66366e-07	515.283	0.000325593	502.697	1.67565e-05	513.833	3.25328e-05	486.088	7.00201e-06	514.347	1.5263e-05	506.343	1.7725e-05	513.074	8.87673e-05	530.234	4.71499e-07	512.16	6.86657e-06	493.689	3.19926e-05	502.62	1.50031e-05	498.087	9.50859e-06	506.553	1.56651e-08	491.684	1.3777e-05	493.228	7.49859e-07	498.087	9.50859e-06	506.553	1.56651e-08	497.501	2.61474e-05
485.291	1.02354e-05	506.793	4.1768e-06	518.955	7.37209e-06	493.515	8.21048e-07	485.263	3.2123e-07	518.614	1.52604e-05	501.751	5.98884e-07	515.54	0.000309023	502.993	1.82671e-05	514.13	3.54964e-05	486.372	7.61069e-06	514.643	1.6654e-05	506.643	1.93817e-05	513.376	8.25257e-05	530.517	5.24111e-07	512.448	7.49474e-06	493.977	2.98732e-05	502.885	1.42904e-05	498.397	1.04913e-05	506.856	1.67967e-08	491.973	1.4999e-05	493.515	8.21048e-07	498.397	1.04913e-05	506.856	1.67967e-08	497.805	2.85827e-05
485.591	1.12282e-05	507.076	4.5354e-06	519.238	8.05361e-06	493.802	8.98856e-07	485.551	3.53199e-07	518.893	1.64744e-05	502.036	6.36419e-07	515.797	0.000294091	503.289	1.99033e-05	514.428	3.87095e-05	486.656	8.26913e-06	514.938	1.81659e-05	506.944	2.11819e-05	513.679	7.66806e-05	530.8	5.82315e-07	512.736	8.1762e-06	494.266	2.7936e-05	503.149	1.36895e-05	498.708	1.15688e-05	507.159	1.8189e-08	492.263	1.63212e-05	493.802	8.98856e-07	498.708	1.15688e-05	507.159	1.8189e-08	498.108	3.12281e-05
485.891	1.23105e-05	507.36	4.92244e-06	519.522	8.79377e-06	494.09	9.83814e-07	485.838	3.88387e-07	519.172	1.77764e-05	502.321	6.79128e-07	516.054	0.000280726	503.585	2.16747e-05	514.726	4.21908e-05	486.939	8.98094e-06	515.233	1.98082e-05	507.244	2.31369e-05	513.981	7.12101e-05	531.084	6.46671e-07	513.024	8.91508e-06	494.554	2.61716e-05	503.414	1.31948e-05	499.018	1.27493e-05	507.462	1.98663e-08	492.552	1.77511e-05	494.09	9.83814e-07	499.018	1.27493e-05	507.462	1.98663e-08	498.412	3.41e-05
486.19	1.34896e-05	507.643	5.33995e-06	519.806	9.5972e-06	494.377	1.0765e-06	486.126	4.27069e-07	519.451	1.91721e-05	502.606	7.27203e-07	516.311	0.000268866	503.882	2.35912e-05	515.024	4.59606e-05	487.223	9.74994e-06	515.528	2.15905e-05	507.545	2.52587e-05	514.284	6.60937e-05	531.367	7.17793e-07	513.312	9.71576e-06	494.843	2.45714e-05	503.679	1.28011e-05	499.329	1.4042e-05	507.766	2.18566e-08	492.841	1.92964e-05	494.377	1.0765e-06	499.329	1.4042e-05	507.766	2.18566e-08	498.715	3.72156e-05
486.49	1.47734e-05	507.927	5.79009e-06	520.089	1.04689e-05	494.664	1.17752e-06	486.414	4.69542e-07	519.729	2.06676e-05	502.892	7.80871e-07	516.567	0.000258451	504.178	2.56634e-05	515.321	5.00403e-05	487.507	1.05802e-05	515.823	2.35234e-05	507.846	2.75602e-05	514.586	6.13114e-05	531.65	7.9635e-07	513.6	1.0583e-05	495.132	2.31278e-05	503.944	1.2504e-05	499.639	1.54565e-05	508.069	2.41924e-08	493.131	2.09656e-05	494.664	1.17752e-06	499.639	1.54565e-05	508.069	2.41924e-08	499.019	4.05935e-05
486.79	1.61705e-05	508.21	6.27512e-06	520.373	1.1414e-05	494.952	1.28756e-06	486.702	5.16132e-07	520.008	2.22691e-05	503.177	8.40396e-07	516.824	0.000249431	504.474	2.79028e-05	515.619	5.44528e-05	487.791	1.14761e-05	516.118	2.56182e-05	508.146	3.0055e-05	514.888	5.68443e-05	531.933	8.83076e-07	513.888	1.15217e-05	495.42	2.18333e-05	504.208	1.22995e-05	499.95	1.70034e-05	508.372	2.6911e-08	493.42	2.27676e-05	494.952	1.28756e-06	499.95	1.70034e-05	508.372	2.6911e-08	499.322	4.42536e-05
487.09	1.76899e-05	508.494	6.79747e-06	520.657	1.24383e-05	495.239	1.40732e-06	486.99	5.67191e-07	520.287	2.39831e-05	503.462	9.06076e-07	517.081	0.000241756	504.77	3.03214e-05	515.917	5.92223e-05	488.074	1.24422e-05	516.414	2.78869e-05	508.447	3.27577e-05	515.191	5.26744e-05	532.216	9.78769e-07	514.176	1.25372e-05	495.709	2.06816e-05	504.473	1.21844e-05	500.26	1.8694e-05	508.675	3.00547e-08	493.71	2.47119e-05	495.239	1.40732e-06	500.26	1.8694e-05	508.675	3.00547e-08	499.626	4.82169e-05
487.39	1.93414e-05	508.777	7.35972e-06	520.94	1.35479e-05	495.526	1.53759e-06	487.278	6.23102e-07	520.565	2.58168e-05	503.748	9.78245e-07	517.338	0.000235387	505.067	3.2932e-05	516.215	6.43747e-05	488.358	1.34834e-05	516.709	3.03423e-05	508.747	3.56839e-05	515.493	4.87845e-05	532.499	1.0843e-06	514.464	1.36353e-05	495.997	1.96668e-05	504.738	1.21559e-05	500.571	2.05405e-05	508.978	3.36717e-08	493.999	2.68085e-05	495.526	1.53759e-06	500.571	2.05405e-05	508.978	3.36717e-08	499.929	5.25058e-05
487.69	2.11354e-05	509.06	7.96457e-06	521.224	1.47491e-05	495.814	1.67917e-06	487.566	6.84276e-07	520.844	2.77773e-05	504.033	1.05727e-06	517.595	0.000230285	505.363	3.57481e-05	516.512	6.99375e-05	488.642	1.46049e-05	517.004	3.2998e-05	509.048	3.885e-05	515.796	4.51582e-05	532.782	1.20063e-06	514.752	1.48221e-05	496.286	1.87835e-05	505.003	1.22118e-05	500.881	2.2556e-05	509.281	3.78167e-08	494.289	2.90681e-05	495.814	1.67917e-06	500.881	2.2556e-05	509.281	3.78167e-08	500.233	5.71442e-05
487.99	2.30829e-05	509.344	8.6149e-06	521.508	1.60488e-05	496.101	1.83297e-06	487.854	7.51163e-07	521.123	2.98725e-05	504.318	1.14356e-06	517.852	0.000226418	505.659	3.87841e-05	516.81	7.59397e-05	488.925	1.58123e-05	517.299	3.58684e-05	509.348	4.22737e-05	516.098	4.178e-05	533.065	1.32879e-06	515.04	1.61039e-05	496.574	1.8027e-05	505.267	1.23502e-05	501.192	2.47546e-05	509.584	4.25513e-08	494.578	3.15019e-05	496.101	1.83297e-06	501.192	2.47546e-05	509.584	4.25513e-08	500.536	6.21575e-05
488.289	2.5196e-05	509.627	9.31377e-06	521.792	1.74544e-05	496.388	1.99993e-06	488.142	8.24243e-07	521.402	3.21103e-05	504.604	1.23757e-06	518.108	0.000223758	505.955	4.20554e-05	517.108	8.24121e-05	489.209	1.71113e-05	517.594	3.89692e-05	509.649	4.59737e-05	516.401	3.86351e-05	533.348	1.46991e-06	515.328	1.74876e-05	496.863	1.73933e-05	505.532	1.25698e-05	501.502	2.71513e-05	509.887	4.79451e-08	494.867	3.4122e-05	496.388	1.99993e-06	501.502	2.71513e-05	509.887	4.79451e-08	500.84	6.75726e-05
488.589	2.74873e-05	509.911	1.00644e-05	522.075	1.89737e-05	496.675	2.18106e-06	488.43	9.04039e-07	521.68	3.44993e-05	504.889	1.33976e-06	518.365	0.000222283	506.252	4.55781e-05	517.406	8.93876e-05	489.493	1.85081e-05	517.89	4.23165e-05	509.949	4.99699e-05	516.703	3.57095e-05	533.631	1.62522e-06	515.616	1.89804e-05	497.151	1.68788e-05	505.797	1.28699e-05	501.813	2.97623e-05	510.19	5.40763e-08	495.157	3.69409e-05	496.675	2.18106e-06	501.813	2.97623e-05	510.19	5.40763e-08	501.143	7.34181e-05
488.889	2.99703e-05	510.194	1.08701e-05	522.359	2.06151e-05	496.963	2.37746e-06	488.718	9.91111e-07	521.959	3.70482e-05	505.174	1.45066e-06	518.622	0.000221973	506.548	4.93691e-05	517.703	9.69007e-05	489.777	2.00092e-05	518.185	4.59279e-05	510.25	5.42834e-05	517.006	3.29897e-05	533.914	1.79606e-06	515.904	2.05903e-05	497.44	1.64806e-05	506.062	1.32498e-05	502.123	3.26051e-05	510.494	6.10328e-08	495.446	3.99723e-05	496.963	2.37746e-06	502.123	3.26051e-05	510.494	6.10328e-08	501.447	7.97242e-05
489.189	3.26595e-05	510.478	1.17346e-05	522.643	2.23874e-05	497.25	2.59029e-06	489.006	1.08607e-06	522.238	3.97665e-05	505.46	1.57085e-06	518.879	0.000222814	506.844	5.34467e-05	518.001	0.000104988	490.06	2.16217e-05	518.48	4.98217e-05	510.55	5.89366e-05	517.308	3.04634e-05	534.197	1.98389e-06	516.192	2.23252e-05	497.728	1.61963e-05	506.326	1.37097e-05	502.434	3.56982e-05	510.797	6.89133e-08	495.736	4.323e-05	497.25	2.59029e-06	502.434	3.56982e-05	510.797	6.89133e-08	501.75	8.65232e-05
489.489	3.55703e-05	510.761	1.26615e-05	522.926	2.42999e-05	497.537	2.82079e-06	489.294	1.18955e-06	522.517	4.26639e-05	505.745	1.70091e-06	519.136	0.000224796	507.14	5.78299e-05	518.299	0.000113688	490.344	2.33526e-05	518.775	5.40176e-05	510.851	6.39531e-05	517.611	2.81185e-05	534.48	2.19029e-06	516.48	2.4194e-05	498.017	1.6024e-05	506.591	1.42499e-05	502.744	3.90616e-05	511.1	7.78282e-08	496.025	4.67293e-05	497.537	2.82079e-06	502.744	3.90616e-05	511.1	7.78282e-08	502.054	9.38488e-05
489.789	3.87191e-05	511.045	1.3655e-05	523.21	2.63628e-05	497.825	3.07029e-06	489.582	1.30227e-06	522.795	4.57504e-05	506.03	1.8415e-06	519.392	0.000227913	507.436	6.25387e-05	518.597	0.000123043	490.628	2.52098e-05	519.07	5.85362e-05	511.151	6.93581e-05	517.913	2.59438e-05	534.763	2.41698e-06	516.768	2.62058e-05	498.305	1.59624e-05	506.856	1.48711e-05	503.055	4.27164e-05	511.403	8.79011e-08	496.315	5.04857e-05	497.825	3.07029e-06	503.055	4.27164e-05	511.403	8.79011e-08	502.357	0.000101737
490.089	4.21233e-05	511.328	1.47191e-05	523.494	2.85867e-05	498.112	3.3402e-06	489.869	1.42498e-06	523.074	4.90368e-05	506.315	1.99332e-06	519.649	0.000232163	507.733	6.75945e-05	518.894	0.000133094	490.912	2.72014e-05	519.365	6.33995e-05	511.452	7.51781e-05	518.216	2.39287e-05	535.047	2.66583e-06	517.056	2.83704e-05	498.594	1.60107e-05	507.121	1.55744e-05	503.365	4.66854e-05	511.706	9.92701e-08	496.604	5.4516e-05	498.112	3.3402e-06	503.365	4.66854e-05	511.706	9.92701e-08	502.661	0.000110226
490.388	4.58014e-05	511.612	1.58583e-05	523.777	3.09828e-05	498.399	3.63201e-06	490.157	1.55848e-06	523.353	5.25342e-05	506.601	2.15709e-06	519.906	0.000237548	508.029	7.30195e-05	519.192	0.000143888	491.195	2.93359e-05	519.661	6.86306e-05	511.753	8.14413e-05	518.518	2.20631e-05	535.33	2.93887e-06	517.344	3.06981e-05	498.882	1.61686e-05	507.385	1.63614e-05	503.676	5.09929e-05	512.009	1.1209e-07	496.893	5.88377e-05	498.399	3.63201e-06	503.676	5.09929e-05	512.009	1.1209e-07	502.964	0.000119356
490.688	4.97731e-05	511.895	1.70773e-05	524.061	3.35631e-05	498.687	3.94735e-06	490.445	1.70365e-06	523.632	5.62541e-05	506.886	2.33361e-06	520.163	0.000244073	508.325	7.88374e-05	519.49	0.000155472	491.479	3.16224e-05	519.956	7.42541e-05	512.053	8.81772e-05	518.82	2.03378e-05	535.613	3.23828e-06	517.632	3.31998e-05	499.171	1.64363e-05	507.65	1.72339e-05	503.987	5.56648e-05	512.312	1.26532e-07	497.183	6.34693e-05	498.687	3.94735e-06	503.987	5.56648e-05	512.312	1.26532e-07	503.268	0.000129169
490.988	5.40592e-05	512.179	1.83809e-05	524.345	3.63403e-05	498.974	4.28791e-06	490.733	1.8614e-06	523.91	6.02086e-05	507.171	2.52372e-06	520.42	0.000251749	508.621	8.50728e-05	519.788	0.000167897	491.763	3.40702e-05	520.251	8.02957e-05	512.354	9.54172e-05	519.123	1.87438e-05	535.896	3.56645e-06	517.92	3.58871e-05	499.459	1.68147e-05	507.915	1.81941e-05	504.297	6.07286e-05	512.615	1.42788e-07	497.472	6.84301e-05	498.974	4.28791e-06	504.297	6.07286e-05	512.615	1.42788e-07	503.571	0.000139709
491.288	5.8682e-05	512.462	1.97742e-05	524.628	3.93277e-05	499.261	4.65551e-06	491.021	2.03275e-06	524.189	6.44103e-05	507.457	2.7283e-06	520.676	0.000260588	508.918	9.17518e-05	520.086	0.000181216	492.046	3.66895e-05	520.546	8.67827e-05	512.654	0.000103194	519.425	1.72728e-05	536.179	3.92595e-06	518.208	3.8772e-05	499.748	1.7305e-05	508.18	1.92445e-05	504.608	6.62138e-05	512.918	1.61073e-07	497.762	7.37407e-05	499.261	4.65551e-06	504.608	6.62138e-05	512.918	1.61073e-07	503.875	0.000151023
491.588	6.36647e-05	512.746	2.12626e-05	524.912	4.25397e-05	499.548	5.05207e-06	491.309	2.21875e-06	524.468	6.88723e-05	507.742	2.9483e-06	520.933	0.000270607	509.214	9.89017e-05	520.383	0.000195486	492.33	3.94906e-05	520.841	9.37439e-05	512.955	0.000111543	519.728	1.59171e-05	536.462	4.31958e-06	518.496	4.18675e-05	500.036	1.7909e-05	508.444	2.0388e-05	504.918	7.21515e-05	513.222	1.81623e-07	498.051	7.94224e-05	499.548	5.05207e-06	504.918	7.21515e-05	513.222	1.81623e-07	504.178	0.000163162
491.888	6.90323e-05	513.029	2.28518e-05	525.196	4.59913e-05	499.836	5.47964e-06	491.597	2.42054e-06	524.747	7.36083e-05	508.027	3.18472e-06	521.19	0.000281828	509.51	0.000106551	520.681	0.000210763	492.614	4.24845e-05	521.136	0.000101209	513.255	0.0001205	520.03	1.46695e-05	536.745	4.75036e-06	518.784	4.51871e-05	500.325	1.86291e-05	508.709	2.16278e-05	505.229	7.85749e-05	513.525	2.04704e-07	498.341	8.54977e-05	499.836	5.47964e-06	505.229	7.85749e-05	513.525	2.04704e-07	504.482	0.000176176
492.188	7.48109e-05	513.313	2.45476e-05	525.48	4.96983e-05	500.123	5.94039e-06	491.885	2.63936e-06	525.025	7.86324e-05	508.313	3.43861e-06	521.447	0.000294274	509.806	0.00011473	520.979	0.000227111	492.898	4.56829e-05	521.432	0.000109211	513.556	0.000130105	520.333	1.35231e-05	537.028	5.22154e-06	519.072	4.8745e-05	500.613	1.9468e-05	508.974	2.29675e-05	505.539	8.55194e-05	513.828	2.30609e-07	498.63	9.19903e-05	500.123	5.94039e-06	505.539	8.55194e-05	513.828	2.30609e-07	504.785	0.00019012
492.487	8.10284e-05	513.596	2.63562e-05	525.763	5.36774e-05	500.41	6.43663e-06	492.173	2.87649e-06	525.304	8.39592e-05	508.598	3.71109e-06	521.704	0.000307974	510.103	0.00012347	521.277	0.000244593	493.181	4.90977e-05	521.727	0.000117783	513.856	0.000140396	520.635	1.24717e-05	537.311	5.73666e-06	519.36	5.25561e-05	500.902	2.0429e-05	509.239	2.44109e-05	505.85	9.30223e-05	514.131	2.59664e-07	498.919	9.89249e-05	500.41	6.43663e-06	505.85	9.30223e-05	514.131	2.59664e-07	505.089	0.000205052
492.787	8.7714e-05	513.88	2.82841e-05	526.047	5.79465e-05	500.698	6.97079e-06	492.461	3.13334e-06	525.583	8.96041e-05	508.883	4.00334e-06	521.96	0.000322958	510.399	0.000132805	521.574	0.000263277	493.465	5.27417e-05	522.022	0.000126959	514.157	0.000151418	520.938	1.15095e-05	537.594	6.29951e-06	519.648	5.66363e-05	501.191	2.15161e-05	509.503	2.59622e-05	506.16	0.000101123	514.434	2.92232e-07	499.209	0.000106327	500.698	6.97079e-06	506.16	0.000101123	514.434	2.92232e-07	505.392	0.000221031
493.087	9.48987e-05	514.163	3.0338e-05	526.331	6.25241e-05	500.985	7.54545e-06	492.749	3.41139e-06	525.862	9.55829e-05	509.169	4.31661e-06	522.217	0.000339263	510.695	0.000142767	521.872	0.000283233	493.749	5.66281e-05	522.317	0.000136777	514.457	0.000163213	521.24	1.06311e-05	537.877	6.91422e-06	519.936	6.1002e-05	501.479	2.27337e-05	509.768	2.7626e-05	506.471	0.000109865	514.737	3.28713e-07	499.498	0.000114225	500.985	7.54545e-06	506.471	0.000109865	514.737	3.28713e-07	505.696	0.00023812
493.387	0.000102615	514.447	3.2525e-05	526.614	6.74299e-05	501.272	8.16334e-06	493.037	3.71223e-06	526.14	0.000101912	509.454	4.6522e-06	522.474	0.000356925	510.991	0.000153394	522.17	0.000304536	494.032	6.07707e-05	522.612	0.000147275	514.758	0.00017583	521.543	9.83143e-06	538.16	7.5852e-06	520.224	6.56708e-05	501.768	2.40865e-05	510.033	2.94071e-05	506.781	0.000119291	515.04	3.69552e-07	499.788	0.000122645	501.272	8.16334e-06	506.781	0.000119291	515.04	3.69552e-07	505.999	0.000256384
493.687	0.000110897	514.73	3.48524e-05	526.898	7.26847e-05	501.56	8.82736e-06	493.325	4.03754e-06	526.419	0.000108608	509.739	5.0115e-06	522.731	0.000375988	511.287	0.000164723	522.468	0.000327262	494.316	6.51842e-05	522.907	0.000158494	515.058	0.000189317	521.845	9.10606e-06	538.443	8.31724e-06	520.512	7.06608e-05	502.056	2.55802e-05	510.298	3.13107e-05	507.092	0.000129449	515.343	4.15242e-07	500.077	0.000131619	501.56	8.82736e-06	507.092	0.000129449	515.343	4.15242e-07	506.303	0.000275893
493.987	0.000119782	515.013	3.73279e-05	527.182	7.83101e-05	501.847	9.54055e-06	493.613	4.38913e-06	526.698	0.000115689	510.024	5.39596e-06	522.988	0.000396496	511.584	0.000176793	522.765	0.000351492	494.6	6.98835e-05	523.203	0.000170476	515.359	0.000203725	522.148	8.45081e-06	538.726	9.11547e-06	520.8	7.59911e-05	502.345	2.72206e-05	510.562	3.33423e-05	507.402	0.000140388	515.646	4.66328e-07	500.367	0.000141176	501.847	9.54055e-06	507.402	0.000140388	515.646	4.66328e-07	506.606	0.000296719
494.287	0.000129306	515.297	3.99595e-05	527.465	8.43292e-05	502.134	1.03061e-05	493.9	4.7689e-06	526.977	0.000123173	510.31	5.80711e-06	523.244	0.000418498	511.88	0.000189645	523.063	0.000377309	494.884	7.48845e-05	523.498	0.000183266	515.659	0.000219107	522.45	7.86192e-06	539.01	9.98545e-06	521.088	8.16818e-05	502.633	2.90143e-05	510.827	3.55078e-05	507.713	0.000152162	515.95	5.23412e-07	500.656	0.000151349	502.134	1.03061e-05	507.713	0.000152162	515.95	5.23412e-07	506.91	0.000318935
494.586	0.000139511	515.58	4.27555e-05	527.749	9.0766e-05	502.421	1.11275e-05	494.188	5.17889e-06	527.255	0.000131078	510.595	6.24655e-06	523.501	0.000442046	512.176	0.000203322	523.361	0.000404802	495.167	8.02036e-05	523.793	0.00019691	515.96	0.00023552	522.752	7.33601e-06	539.293	1.09331e-05	521.376	8.77538e-05	502.922	3.09684e-05	511.092	3.78133e-05	508.023	0.000164825	516.253	5.87159e-07	500.945	0.000162172	502.421	1.11275e-05	508.023	0.000164825	516.253	5.87159e-07	507.213	0.00034262
494.886	0.000150437	515.864	4.57245e-05	528.033	9.76457e-05	502.709	1.20082e-05	494.476	5.62126e-06	527.534	0.000139425	510.88	6.71596e-06	523.758	0.000467196	512.472	0.000217867	523.659	0.000434061	495.451	8.5858e-05	524.088	0.000211456	516.261	0.000253021	523.055	6.8701e-06	539.576	1.19649e-05	521.664	9.42291e-05	503.21	3.30906e-05	511.357	4.02654e-05	508.334	0.000178435	516.556	6.58305e-07	501.235	0.000173678	502.709	1.20082e-05	508.334	0.000178435	516.556	6.58305e-07	507.517	0.000367855
495.186	0.000162129	516.147	4.88756e-05	528.317	0.000104995	502.996	1.29521e-05	494.764	6.09831e-06	527.813	0.000148232	511.166	7.2171e-06	524.015	0.000494006	512.769	0.000233326	523.956	0.000465181	495.735	9.18656e-05	524.383	0.000226955	516.561	0.000271672	523.357	6.46153e-06	539.859	1.30877e-05	521.952	0.000101131	503.499	3.5389e-05	511.621	4.28709e-05	508.644	0.000193055	516.859	7.3766e-07	501.524	0.000185905	502.996	1.29521e-05	508.644	0.000193055	516.859	7.3766e-07	507.82	0.000394724
495.486	0.000174634	516.431	5.2218e-05	528.6	0.000112841	503.283	1.3963e-05	495.052	6.61248e-06	528.092	0.00015752	511.451	7.75183e-06	524.272	0.000522539	513.065	0.000249747	524.254	0.00049826	496.018	9.82447e-05	524.679	0.000243459	516.862	0.000291535	523.66	6.10804e-06	540.142	1.43089e-05	522.24	0.000108482	503.787	3.78724e-05	511.886	4.56371e-05	508.955	0.000208749	517.162	8.2612e-07	501.814	0.000198891	503.283	1.3963e-05	508.955	0.000208749	517.162	8.2612e-07	508.124	0.000423316
495.786	0.000187998	516.714	5.57615e-05	528.884	0.000121214	503.571	1.50452e-05	495.34	7.16634e-06	528.37	0.00016731	511.736	8.32208e-06	524.528	0.000552861	513.361	0.000267179	524.552	0.000533399	496.302	0.000105015	524.974	0.000261024	517.162	0.000312677	523.962	5.80771e-06	540.425	1.56364e-05	522.528	0.000116309	504.076	4.05503e-05	512.151	4.85714e-05	509.265	0.000225584	517.465	9.24669e-07	502.103	0.000212673	503.571	1.50452e-05	509.265	0.000225584	517.465	9.24669e-07	508.427	0.000453722
496.086	0.000202273	516.998	5.95161e-05	529.168	0.000130144	503.858	1.62031e-05	495.628	7.76264e-06	528.649	0.000177625	512.022	8.92988e-06	524.785	0.000585039	513.657	0.000285673	524.85	0.000570705	496.586	0.000112196	525.269	0.000279705	517.463	0.000335165	524.265	5.55895e-06	540.708	1.70787e-05	522.816	0.000124636	504.364	4.34327e-05	512.416	5.16819e-05	509.576	0.000243632	517.768	1.03439e-06	502.393	0.000227293	503.858	1.62031e-05	509.576	0.000243632	517.768	1.03439e-06	508.731	0.000486035
496.386	0.000217512	517.281	6.34921e-05	529.451	0.000139662	504.145	1.74412e-05	495.916	8.40427e-06	528.928	0.000188485	512.307	9.57733e-06	525.042	0.000619148	513.954	0.000305283	525.147	0.000610286	496.87	0.000119808	525.564	0.000299563	517.763	0.00035907	524.567	5.36056e-06	540.991	1.86451e-05	523.104	0.000133492	504.653	4.65301e-05	512.68	5.49768e-05	509.886	0.000262968	518.071	1.15649e-06	502.682	0.000242793	504.145	1.74412e-05	509.886	0.000262968	518.071	1.15649e-06	509.034	0.000520355
496.685	0.000233769	517.565	6.77003e-05	529.735	0.000149803	504.433	1.87645e-05	496.204	9.0943e-06	529.207	0.000199914	512.592	1.02666e-05	525.299	0.000655262	514.25	0.000326062	525.445	0.000652257	497.153	0.000127874	525.859	0.000320659	518.064	0.000384467	524.87	5.21166e-06	541.274	2.03452e-05	523.392	0.000142904	504.941	4.98538e-05	512.945	5.84647e-05	510.197	0.00028367	518.374	1.29227e-06	502.971	0.000259216	504.433	1.87645e-05	510.197	0.00028367	518.374	1.29227e-06	509.338	0.000556782
496.985	0.000251102	517.848	7.21518e-05	530.019	0.0001606	504.72	2.01778e-05	496.492	9.83597e-06	529.485	0.000211935	512.877	1.10001e-05	525.556	0.00069346	514.546	0.000348068	525.743	0.000696733	497.437	0.000136415	526.154	0.000343056	518.364	0.000411431	525.172	5.11175e-06	541.557	2.21895e-05	523.68	0.000152901	505.23	5.34157e-05	513.21	6.21546e-05	510.507	0.00030582	518.678	1.44317e-06	503.261	0.000276608	504.72	2.01778e-05	510.507	0.00030582	518.678	1.44317e-06	509.641	0.00059542
497.285	0.000269571	518.132	7.68582e-05	530.302	0.00017209	505.007	2.16867e-05	496.78	1.06327e-05	529.764	0.000224572	513.163	1.17802e-05	525.812	0.000733825	514.842	0.000371358	526.041	0.000743835	497.721	0.000145455	526.45	0.00036682	518.665	0.000440041	525.475	5.06066e-06	541.84	2.41893e-05	523.968	0.000163514	505.518	5.72282e-05	513.475	6.60559e-05	510.818	0.000329504	518.981	1.6108e-06	503.55	0.000295014	505.007	2.16867e-05	510.818	0.000329504	518.981	1.6108e-06	509.945	0.000636379
497.585	0.000289238	518.415	8.18311e-05	530.586	0.000184312	505.295	2.32965e-05	497.068	1.14881e-05	530.043	0.000237849	513.448	1.26093e-05	526.069	0.000776442	515.138	0.000395992	526.338	0.000793688	498.005	0.000155016	526.745	0.00039202	518.965	0.000470378	525.777	5.0586e-06	542.123	2.63565e-05	524.256	0.000174775	505.807	6.13045e-05	513.739	7.01783e-05	511.129	0.000354811	519.284	1.79687e-06	503.84	0.000314482	505.295	2.32965e-05	511.129	0.000354811	519.284	1.79687e-06	510.248	0.00067977
497.885	0.000310168	518.699	8.70829e-05	530.87	0.000197303	505.582	2.50131e-05	497.356	1.2406e-05	530.321	0.000251792	513.733	1.34902e-05	526.326	0.0008214	515.435	0.000422031	526.636	0.00084642	498.288	0.000165125	527.04	0.000418727	519.266	0.000502527	526.08	5.10613e-06	542.406	2.8704e-05	524.544	0.000186716	506.095	6.56584e-05	514.004	7.4532e-05	511.439	0.000381835	519.587	2.00331e-06	504.129	0.000335062	505.582	2.50131e-05	511.439	0.000381835	519.587	2.00331e-06	510.552	0.000725707
498.185	0.000332429	518.982	9.2626e-05	531.153	0.000211106	505.869	2.68426e-05	497.643	1.33905e-05	530.6	0.000266424	514.019	1.44254e-05	526.583	0.000868791	515.731	0.000449541	526.934	0.000902163	498.572	0.000175805	527.335	0.000447013	519.566	0.000536576	526.382	5.20421e-06	542.69	3.12454e-05	524.832	0.000199371	506.384	7.03044e-05	514.269	7.91275e-05	511.75	0.000410673	519.89	2.23221e-06	504.419	0.000356804	505.869	2.68426e-05	511.75	0.000410673	519.89	2.23221e-06	510.855	0.000774309
498.485	0.000356089	519.266	9.84735e-05	531.437	0.000225763	506.156	2.87913e-05	497.931	1.44457e-05	530.879	0.000281774	514.304	1.54178e-05	526.84	0.000918711	516.027	0.000478584	527.232	0.000961051	498.856	0.000187084	527.63	0.000476953	519.867	0.000572612	526.684	5.35416e-06	542.973	3.39953e-05	525.12	0.000212775	506.672	7.52578e-05	514.534	8.39757e-05	512.06	0.000441427	520.193	2.48586e-06	504.708	0.000379762	506.156	2.87913e-05	512.06	0.000441427	520.193	2.48586e-06	511.159	0.000825697
498.784	0.000381223	519.549	0.000104639	531.721	0.000241318	506.444	3.08659e-05	498.219	1.55761e-05	531.158	0.000297866	514.589	1.64703e-05	527.096	0.000971258	516.323	0.000509228	527.529	0.00102322	499.139	0.000198987	527.925	0.000508626	520.167	0.000610728	526.987	5.55774e-06	543.256	3.69694e-05	525.408	0.000226965	506.961	8.05344e-05	514.798	8.9088e-05	512.371	0.000474202	520.496	2.76676e-06	504.997	0.000403988	506.444	3.08659e-05	512.371	0.000474202	520.496	2.76676e-06	511.462	0.000879996
499.084	0.000407904	519.833	0.000111135	532.005	0.000257818	506.731	3.30731e-05	498.507	1.67864e-05	531.436	0.000314727	514.875	1.75861e-05	527.353	0.00102653	516.62	0.000541542	527.827	0.00108882	499.423	0.000211543	528.221	0.000542112	520.468	0.00065102	527.289	5.81708e-06	543.539	4.01842e-05	525.696	0.000241977	507.25	8.61507e-05	515.063	9.4476e-05	512.681	0.000509108	520.799	3.07767e-06	505.287	0.000429538	506.731	3.30731e-05	512.681	0.000509108	520.799	3.07767e-06	511.766	0.000937334
499.384	0.000436211	520.116	0.000117976	532.288	0.000275309	507.018	3.54203e-05	498.795	1.80815e-05	531.715	0.000332385	515.16	1.87681e-05	527.61	0.00108464	516.916	0.000575595	528.125	0.001158	499.707	0.00022478	528.516	0.000577492	520.769	0.000693583	527.592	6.13478e-06	543.822	4.36575e-05	525.984	0.000257851	507.538	9.2124e-05	515.328	0.000100152	512.992	0.000546259	521.102	3.42159e-06	505.576	0.000456468	507.018	3.54203e-05	512.992	0.000546259	521.102	3.42159e-06	512.069	0.000997841
499.684	0.000466224	520.4	0.000125178	532.572	0.000293843	507.306	3.79148e-05	499.083	1.94667e-05	531.994	0.000350868	515.445	2.00197e-05	527.867	0.0011457	517.212	0.000611459	528.423	0.00123089	499.991	0.000238727	528.811	0.000614851	521.069	0.000738518	527.894	6.51387e-06	544.105	4.7408e-05	526.272	0.000274626	507.827	9.84725e-05	515.593	0.000106128	513.302	0.000585772	521.406	3.80178e-06	505.866	0.000484836	507.306	3.79148e-05	513.302	0.000585772	521.406	3.80178e-06	512.373	0.00106165
499.984	0.000498026	520.683	0.000132753	532.856	0.000313469	507.593	4.05644e-05	499.371	2.09473e-05	532.273	0.000370202	515.731	2.13442e-05	528.124	0.0012098	517.508	0.000649207	528.72	0.00130766	500.274	0.000253413	529.106	0.000654275	521.37	0.000785927	528.197	6.95785e-06	544.388	5.14559e-05	526.56	0.000292343	508.115	0.000105215	515.857	0.000112418	513.613	0.000627771	521.709	4.22184e-06	506.155	0.000514702	507.593	4.05644e-05	513.613	0.000627771	521.709	4.22184e-06	512.676	0.0011289
500.284	0.000531703	520.966	0.000140717	533.139	0.00033424	507.88	4.33772e-05	499.659	2.2529e-05	532.551	0.000390417	516.016	2.27452e-05	528.38	0.00127708	517.804	0.000688912	529.018	0.00138846	500.558	0.00026887	529.401	0.000695854	521.67	0.000835914	528.499	7.47074e-06	544.671	5.58225e-05	526.848	0.000311045	508.404	0.00011237	516.122	0.000119034	513.923	0.000672382	522.012	4.68567e-06	506.445	0.000546125	507.88	4.33772e-05	513.923	0.000672382	522.012	4.68567e-06	512.98	0.00119973
500.584	0.000567342	521.25	0.000149086	533.423	0.000356212	508.168	4.63616e-05	499.947	2.42179e-05	532.83	0.00041154	516.301	2.42262e-05	528.637	0.00134763	518.101	0.00073065	529.316	0.00147345	500.842	0.000285128	529.697	0.000739678	521.971	0.000888586	528.802	8.05705e-06	544.954	6.05305e-05	527.136	0.000330774	508.692	0.000119959	516.387	0.000125991	514.234	0.000719734	522.315	5.19751e-06	506.734	0.000579168	508.168	4.63616e-05	514.234	0.000719734	522.315	5.19751e-06	513.283	0.00127428
500.884	0.000605036	521.533	0.000157876	533.707	0.000379442	508.455	4.95263e-05	500.235	2.60202e-05	533.109	0.000433601	516.586	2.5791e-05	528.894	0.0014216	518.397	0.000774498	529.614	0.00156279	501.125	0.00030222	529.992	0.00078584	522.271	0.000944051	529.104	8.72187e-06	545.237	6.56039e-05	527.424	0.000351575	508.981	0.000128003	516.652	0.000133303	514.544	0.000769964	522.618	5.76201e-06	507.023	0.000613894	508.455	4.95263e-05	514.544	0.000769964	522.618	5.76201e-06	513.587	0.0013527
501.183	0.000644876	521.817	0.000167101	533.99	0.000403986	508.742	5.28802e-05	500.523	2.79423e-05	533.388	0.000456628	516.872	2.74433e-05	529.151	0.00149909	518.693	0.000820534	529.911	0.00165663	501.409	0.000320178	530.287	0.000834435	522.572	0.00100242	529.407	9.47087e-06	545.52	7.10683e-05	527.712	0.000373495	509.269	0.000136522	516.916	0.000140984	514.855	0.000823211	522.921	6.38421e-06	507.313	0.000650366	508.742	5.28802e-05	514.855	0.000823211	522.921	6.38421e-06	513.89	0.00143512
501.483	0.000686959	522.1	0.000176779	534.274	0.000429907	509.029	5.64326e-05	500.811	2.99912e-05	533.666	0.000480651	517.157	2.91872e-05	529.408	0.00158023	518.989	0.000868837	530.209	0.00175516	501.693	0.000339035	530.582	0.00088556	522.872	0.00106381	529.709	1.03103e-05	545.803	7.69508e-05	528	0.000396578	509.558	0.00014554	517.181	0.00014905	515.165	0.000879616	523.224	7.06961e-06	507.602	0.000688649	509.029	5.64326e-05	515.165	0.000879616	523.224	7.06961e-06	514.194	0.0015217
501.783	0.000731382	522.384	0.000186925	534.558	0.000457265	509.317	6.01933e-05	501.099	3.2174e-05	533.945	0.000505698	517.442	3.10267e-05	529.664	0.00166516	519.286	0.000919486	530.507	0.00185852	501.977	0.000358824	530.877	0.000939313	523.173	0.00112832	530.012	1.12471e-05	546.086	8.32802e-05	528.288	0.000420874	509.846	0.00015508	517.446	0.000157517	515.476	0.000939329	523.527	7.82416e-06	507.892	0.00072881	509.317	6.01933e-05	515.476	0.000939329	523.527	7.82416e-06	514.497	0.0016126
502.083	0.000778248	522.667	0.000197557	534.842	0.000486124	509.604	6.41721e-05	501.387	3.44981e-05	534.224	0.0005318	517.728	3.29661e-05	529.921	0.001754	519.582	0.000972561	530.805	0.0019669	502.26	0.000379581	531.172	0.000995795	523.473	0.00119609	530.314	1.2289e-05	546.369	9.0087e-05	528.576	0.000446431	510.135	0.000165165	517.711	0.000166399	515.786	0.0010025	523.83	8.65437e-06	508.181	0.000770915	509.604	6.41721e-05	515.786	0.0010025	523.83	8.65437e-06	514.801	0.00170795
502.383	0.000827657	522.951	0.000208692	535.125	0.00051655	509.891	6.83794e-05	501.674	3.69713e-05	534.503	0.000558985	518.013	3.50095e-05	530.178	0.00184689	519.878	0.00102814	531.102	0.00208047	502.544	0.00040134	531.468	0.00105511	523.774	0.00126722	530.616	1.34442e-05	546.653	9.74033e-05	528.864	0.000473298	510.423	0.00017582	517.975	0.000175715	516.097	0.00106928	524.134	9.56727e-06	508.471	0.000815032	509.891	6.83794e-05	516.097	0.00106928	524.134	9.56727e-06	515.104	0.00180791
502.683	0.000879717	523.234	0.000220346	535.409	0.00054861	510.179	7.28257e-05	501.962	3.96017e-05	534.781	0.000587283	518.298	3.71615e-05	530.435	0.00194397	520.174	0.00108632	531.4	0.00219939	502.828	0.000424137	531.763	0.00111735	524.074	0.00134183	530.919	1.47219e-05	546.936	0.000105263	529.152	0.000501527	510.712	0.000187071	518.24	0.00018548	516.407	0.00113984	524.437	1.05705e-05	508.76	0.000861229	510.179	7.28257e-05	516.407	0.00113984	524.437	1.05705e-05	515.408	0.00191264
[truncated: 541 more rows]
[truncated: 54 more columns]
