# Supplementary material for: How to tune the absorption spectrum of chlorophylls to enable better use of the available solar spectrum
Source: PeerJ journal article supplement (doi:10.7717/peerj-pchem.26), 2022-12-19
Supplement: Grficos_modificas_simples.xlsx [file Grficos_modificas_simples.xlsx]

## Sheet: Folha1
	Chlorophyll a			8-CHCH2			8-CHO			12-CHCH2			12-CHO			2-CHCH2			2-CHO (f)			3-CH3			3-CHO (d)			7-CHCH2			7-CHO (b)
245.404	6.09429e-12		260.428	7.4327e-12		263.505	1.21897e-12		249.98	2.48277e-12		264.366	9.17895e-13		255.007	3.43466e-12		274.951	1.24461e-13		244.573	1.07036e-11		258.399	3.27757e-13		260.471	1.02319e-11		272.037	1.21933e-12
245.704	7.15191e-12	3.52708e-12	260.718	8.68167e-12	4.31525e-12	263.792	1.42122e-12	7.0381e-13	250.291	2.94452e-12	1.48703e-12	264.67	1.08526e-12	5.52138e-13	255.31	4.05315e-12	2.03788e-12	275.249	1.4686e-13	7.51656e-14	244.866	1.24776e-11	6.06911e-12	258.708	3.88961e-13	1.98137e-13	260.76	1.19358e-11	5.90809e-12	272.311	1.40862e-12	6.91854e-13
246.004	8.38844e-12	4.12369e-12	261.007	1.01353e-11	5.02249e-12	264.079	1.65619e-12	8.17652e-13	250.601	3.49008e-12	1.75691e-12	264.973	1.2824e-12	6.50414e-13	255.614	4.78031e-12	2.39592e-12	275.547	1.73195e-13	8.83748e-14	245.158	1.45379e-11	7.04883e-12	259.017	4.61321e-13	2.34257e-13	261.048	1.39163e-11	6.86734e-12	272.584	1.62655e-12	7.9656e-13
246.304	9.8333e-12	4.81848e-12	261.297	1.18264e-11	5.84259e-12	264.367	1.92901e-12	9.49415e-13	250.912	4.13426e-12	2.07452e-12	265.276	1.51451e-12	7.6574e-13	255.917	5.63472e-12	2.81522e-12	275.845	2.0414e-13	1.03847e-13	245.45	1.69295e-11	8.18232e-12	259.326	5.46822e-13	2.76797e-13	261.337	1.62172e-11	7.9782e-12	272.858	1.87735e-12	9.16689e-13
246.603	1.15206e-11	5.62715e-12	261.586	1.37925e-11	6.79305e-12	264.654	2.24564e-12	1.10184e-12	251.222	4.89443e-12	2.44805e-12	265.579	1.78761e-12	9.00993e-13	256.221	6.63808e-12	3.306e-12	276.143	2.40483e-13	1.21961e-13	245.743	1.97043e-11	9.49298e-12	259.635	6.47789e-13	3.26865e-13	261.625	1.88889e-11	9.26392e-12	273.131	2.16583e-12	1.05445e-12
246.903	1.34901e-11	6.56782e-12	261.876	1.60772e-11	7.89403e-12	264.941	2.61292e-12	1.27807e-12	251.533	5.79094e-12	2.8871e-12	265.882	2.10877e-12	1.05952e-12	256.524	7.81568e-12	3.88009e-12	276.441	2.83142e-13	1.43154e-13	246.035	2.29218e-11	1.10077e-11	259.943	7.66947e-13	3.85758e-13	261.913	2.19895e-11	1.07512e-11	273.405	2.49752e-12	1.21235e-12
247.203	1.57874e-11	7.66139e-12	262.165	1.87309e-11	9.16866e-12	265.229	3.03871e-12	1.48171e-12	251.843	6.84759e-12	3.40282e-12	266.185	2.48621e-12	1.24523e-12	256.828	9.19697e-12	4.55124e-12	276.739	3.33186e-13	1.67936e-13	246.327	2.66506e-11	1.27572e-11	260.252	9.07491e-13	4.54989e-13	262.202	2.55861e-11	1.24709e-11	273.679	2.8787e-12	1.39325e-12
247.503	1.84657e-11	8.93199e-12	262.455	2.18115e-11	1.06436e-11	265.516	3.53209e-12	1.71691e-12	252.154	8.09223e-12	4.00823e-12	266.488	2.92955e-12	1.46264e-12	257.131	1.08162e-11	5.33538e-12	277.037	3.9186e-13	1.96898e-13	246.62	3.09698e-11	1.47768e-11	260.561	1.07316e-12	5.36323e-13	262.49	2.97558e-11	1.4458e-11	273.952	3.31655e-12	1.6004e-12
247.803	2.15865e-11	1.04074e-11	262.744	2.53858e-11	1.23493e-11	265.803	4.10349e-12	1.98841e-12	252.464	9.55742e-12	4.71849e-12	266.791	3.45e-12	1.71701e-12	257.435	1.27134e-11	6.25101e-12	277.335	4.60614e-13	2.30727e-13	246.912	3.59701e-11	1.7107e-11	260.87	1.26832e-12	6.31816e-13	262.779	3.45873e-11	1.67531e-11	274.226	3.81927e-12	1.83751e-12
248.103	2.52207e-11	1.21197e-11	263.033	2.95307e-11	1.43208e-11	266.091	4.7649e-12	2.30165e-12	252.775	1.12812e-11	5.55124e-12	267.095	4.06061e-12	2.01446e-12	257.738	1.49349e-11	7.31953e-12	277.633	5.41136e-13	2.70216e-13	247.204	4.17558e-11	1.97939e-11	261.179	1.4981e-12	7.43867e-13	263.067	4.01829e-11	1.94023e-11	274.499	4.39621e-12	2.10877e-12
248.403	2.94504e-11	1.41057e-11	263.323	3.43348e-11	1.65986e-11	266.378	5.53011e-12	2.66284e-12	253.085	1.3308e-11	6.527e-12	267.398	4.77658e-12	2.36207e-12	258.042	1.75345e-11	8.56573e-12	277.931	6.35387e-13	3.16287e-13	247.496	4.84466e-11	2.28906e-11	261.488	1.76846e-12	8.75263e-13	263.355	4.666e-11	2.24589e-11	274.773	5.05801e-12	2.41896e-12
248.702	3.43704e-11	1.64079e-11	263.612	3.99001e-11	1.92285e-11	266.666	6.41494e-12	3.07911e-12	253.396	1.56896e-11	7.66961e-12	267.701	5.61562e-12	2.76807e-12	258.345	2.05751e-11	1.00183e-11	278.229	7.45646e-13	3.70007e-13	247.789	5.618e-11	2.64576e-11	261.797	2.08639e-12	1.02925e-12	263.644	5.41536e-11	2.59834e-11	275.046	5.81681e-12	2.7735e-12
249.002	4.00902e-11	1.90749e-11	263.902	4.63438e-11	2.22635e-11	266.953	7.43756e-12	3.5586e-12	253.706	1.84863e-11	9.00677e-12	268.004	6.5983e-12	3.24197e-12	258.649	2.41291e-11	1.17104e-11	278.527	8.7456e-13	4.32609e-13	248.081	6.51137e-11	3.05639e-11	262.106	2.46003e-12	1.2096e-12	263.932	6.28186e-11	3.00453e-11	275.32	6.68643e-12	3.17853e-12
249.302	4.6736e-11	2.21629e-11	264.191	5.38008e-11	2.57641e-11	267.24	8.6188e-12	4.11062e-12	254.017	2.17688e-11	1.05706e-11	268.307	7.74855e-12	3.79481e-12	258.952	2.82811e-11	1.36804e-11	278.825	1.0252e-12	5.0552e-13	248.373	7.54284e-11	3.52886e-11	262.415	2.89888e-12	1.42071e-12	264.221	7.28329e-11	3.47242e-11	275.594	7.68258e-12	3.64103e-12
249.602	5.44532e-11	2.57363e-11	264.481	6.24257e-11	2.97996e-11	267.528	9.98258e-12	4.7458e-12	254.327	2.56188e-11	1.23985e-11	268.61	9.09417e-12	4.43935e-12	259.256	3.31287e-11	1.59726e-11	279.123	1.20113e-12	5.9039e-13	248.666	8.73311e-11	4.07217e-11	262.724	3.41401e-12	1.66765e-12	264.509	8.44008e-11	4.01107e-11	275.867	8.82315e-12	4.16891e-12
249.902	6.34096e-11	2.98688e-11	264.77	7.23964e-11	3.44493e-11	267.815	1.15563e-11	5.47628e-12	254.638	3.01318e-11	1.45336e-11	268.913	1.06674e-11	5.19037e-12	259.559	3.87853e-11	1.8638e-11	279.421	1.40648e-12	6.89124e-13	248.958	1.01059e-10	4.69661e-11	263.032	4.01831e-12	1.95634e-12	264.797	9.77561e-11	4.63088e-11	276.141	1.01285e-11	4.77112e-12
250.202	7.37983e-11	3.46452e-11	265.059	8.39168e-11	3.98036e-11	268.102	1.33712e-11	6.3159e-12	254.948	3.54187e-11	1.70261e-11	269.216	1.25058e-11	6.06492e-12	259.863	4.5382e-11	2.17355e-11	279.719	1.64605e-12	8.03919e-13	249.25	1.16884e-10	5.41388e-11	263.341	4.72679e-12	2.29362e-12	265.086	1.13167e-10	5.34367e-11	276.414	1.16217e-11	5.45781e-12
250.502	8.58414e-11	4.01627e-11	265.349	9.72208e-11	4.59661e-11	268.39	1.54634e-11	7.28046e-12	255.259	4.16087e-11	1.99339e-11	269.519	1.46526e-11	7.08274e-12	260.166	5.30705e-11	2.53332e-11	280.017	1.92536e-12	9.37314e-13	249.543	1.35115e-10	6.23735e-11	263.65	5.55693e-12	2.68744e-12	265.374	1.30941e-10	6.16297e-11	276.688	1.3329e-11	6.24045e-12
250.801	9.97946e-11	4.65325e-11	265.638	1.12577e-10	5.30551e-11	268.677	1.78738e-11	8.38795e-12	255.569	4.88513e-11	2.33241e-11	269.823	1.71583e-11	8.26657e-12	260.47	6.20265e-11	2.95093e-11	280.315	2.25083e-12	1.09223e-12	249.835	1.56108e-10	7.1822e-11	263.959	6.52902e-12	3.14699e-12	265.663	1.51429e-10	7.10417e-11	276.962	1.52803e-11	7.13203e-12
251.101	1.15952e-10	5.38819e-11	265.928	1.30291e-10	6.12054e-11	268.964	2.06494e-11	9.65888e-12	255.88	5.73206e-11	2.72744e-11	270.126	2.00812e-11	9.6427e-12	260.773	7.24528e-11	3.43538e-11	280.613	2.62989e-12	1.27204e-12	250.127	1.80269e-10	8.26573e-11	264.268	7.66664e-12	3.68291e-12	265.951	1.75034e-10	8.18486e-11	277.235	1.75093e-11	8.14725e-12
251.401	1.3465e-10	6.23568e-11	266.217	1.50717e-10	7.05709e-11	269.252	2.38439e-11	1.11166e-11	256.19	6.72182e-11	3.18743e-11	270.429	2.34886e-11	1.12414e-11	261.077	8.45837e-11	3.99705e-11	280.911	3.07111e-12	1.48063e-12	250.419	2.08059e-10	9.50761e-11	264.577	8.9972e-12	4.30749e-12	266.239	2.02216e-10	9.42502e-11	277.509	2.00544e-11	9.30269e-12
251.701	1.56277e-10	7.21236e-11	266.507	1.74255e-10	8.1327e-11	269.539	2.75187e-11	1.27876e-11	256.501	7.87781e-11	3.72273e-11	270.732	2.74586e-11	1.30976e-11	261.38	9.86898e-11	4.64785e-11	281.209	3.58438e-12	1.72246e-12	250.712	2.40007e-10	1.09302e-10	264.886	1.05525e-11	5.03498e-12	266.528	2.335e-10	1.08474e-10	277.782	2.29591e-11	1.06171e-11
252.001	1.81277e-10	8.33729e-11	266.796	2.01367e-10	9.36736e-11	269.827	3.17435e-11	1.47022e-11	256.811	9.22711e-11	4.34529e-11	271.035	3.20815e-11	1.52514e-11	261.684	1.15083e-10	5.40148e-11	281.507	4.18116e-12	2.00266e-12	251.004	2.76716e-10	1.25589e-10	265.195	1.23693e-11	5.88179e-12	266.816	2.69486e-10	1.2478e-10	278.056	2.62728e-11	1.21117e-11
252.301	2.1016e-10	9.63221e-11	267.085	2.32579e-10	1.07838e-10	270.114	3.65984e-11	1.68945e-11	257.122	1.08011e-10	5.06887e-11	271.338	3.74614e-11	1.77491e-11	261.987	1.34124e-10	6.27367e-11	281.805	4.87463e-12	2.32714e-12	251.296	3.18872e-10	1.44225e-10	265.504	1.44905e-11	6.86688e-12	267.105	3.1086e-10	1.43462e-10	278.33	3.00511e-11	1.38102e-11
252.601	2.4351e-10	1.11219e-10	267.375	2.68492e-10	1.2408e-10	270.401	4.21744e-11	1.94037e-11	257.433	1.26361e-10	5.90936e-11	271.641	4.37188e-11	2.06439e-11	262.291	1.56226e-10	7.28247e-11	282.103	5.68001e-12	2.70269e-12	251.589	3.67258e-10	1.65537e-10	265.812	1.69654e-11	8.01215e-12	267.393	3.58404e-10	1.64855e-10	278.603	3.43573e-11	1.57398e-11
252.9	2.81996e-10	1.28348e-10	267.664	3.09791e-10	1.42694e-10	270.689	4.85751e-11	2.2274e-11	257.743	1.4774e-10	6.88501e-11	271.944	5.09926e-11	2.39969e-11	262.594	1.81867e-10	8.44857e-11	282.401	6.61483e-12	3.13709e-12	251.881	4.22764e-10	1.89896e-10	266.121	1.98513e-11	9.34279e-12	267.681	4.13009e-10	1.8934e-10	278.877	3.9263e-11	1.79307e-11
253.2	3.26384e-10	1.4803e-10	267.954	3.57262e-10	1.64014e-10	270.976	5.59189e-11	2.55554e-11	258.054	1.72634e-10	8.01687e-11	272.247	5.94428e-11	2.78783e-11	262.898	2.11596e-10	9.79571e-11	282.699	7.6993e-12	3.63927e-12	252.173	4.86403e-10	2.17723e-10	266.43	2.32145e-11	1.08879e-11	267.97	4.75692e-10	2.17348e-10	279.15	4.4849e-11	2.04172e-11
253.5	3.7755e-10	1.70633e-10	268.243	4.11797e-10	1.88421e-10	271.263	6.43401e-11	2.9305e-11	258.364	2.01603e-10	9.32913e-11	272.551	6.92542e-11	3.23688e-11	263.201	2.46047e-10	1.13511e-10	282.997	8.95667e-12	4.21947e-12	252.465	5.59328e-10	2.49492e-10	266.739	2.71316e-11	1.26808e-11	268.258	5.47609e-10	2.49368e-10	279.424	5.12066e-11	2.32378e-11
253.8	4.36495e-10	1.96576e-10	268.533	4.74415e-10	2.16347e-10	271.551	7.39919e-11	3.35873e-11	258.675	2.35294e-10	1.08496e-10	272.854	8.06394e-11	3.75608e-11	263.505	2.85944e-10	1.31458e-10	283.295	1.04137e-11	4.88945e-12	252.758	6.4285e-10	2.85744e-10	267.048	3.16909e-11	1.47602e-11	268.547	6.30078e-10	2.85957e-10	279.698	5.84392e-11	2.64359e-11
254.1	5.04364e-10	2.26335e-10	268.822	5.46275e-10	2.48283e-10	271.838	8.50483e-11	3.84751e-11	258.985	2.74451e-10	1.26101e-10	273.157	9.3843e-11	4.35604e-11	263.808	3.32122e-10	1.52153e-10	283.593	1.21011e-11	5.66263e-12	253.05	7.38456e-10	3.27087e-10	267.357	3.69947e-11	1.71701e-11	268.835	7.24599e-10	3.27743e-10	279.971	6.66634e-11	3.00604e-11
254.4	5.82462e-10	2.60451e-10	269.111	6.287e-10	2.84784e-10	272.125	9.77071e-11	4.40513e-11	259.296	3.19934e-10	1.46475e-10	273.46	1.09147e-10	5.0489e-11	264.112	3.85539e-10	1.76005e-10	283.891	1.40543e-11	6.5544e-12	253.342	8.47835e-10	3.7421e-10	267.666	4.31607e-11	1.99615e-11	269.123	8.32875e-10	3.75439e-10	280.245	7.60109e-11	3.4166e-11
254.7	6.72281e-10	2.99539e-10	269.401	7.23194e-10	3.2648e-10	272.413	1.12193e-10	5.04094e-11	259.606	3.72734e-10	1.70036e-10	273.763	1.26875e-10	5.84856e-11	264.415	4.47294e-10	2.03478e-10	284.189	1.63137e-11	7.58238e-12	253.635	9.72906e-10	4.27891e-10	267.975	5.03248e-11	2.31928e-11	269.412	9.56843e-10	4.29852e-10	280.518	8.66302e-11	3.88146e-11
254.999	7.75522e-10	3.44297e-10	269.69	8.31466e-10	3.74086e-10	272.7	1.28761e-10	5.76549e-11	259.917	4.3399e-10	1.97267e-10	274.066	1.47398e-10	6.77096e-11	264.719	5.18647e-10	2.35103e-10	284.487	1.89261e-11	8.76666e-12	253.927	1.11584e-09	4.8901e-10	268.284	5.86436e-11	2.69309e-11	269.7	1.0987e-09	4.91895e-10	280.792	9.86888e-11	4.40755e-11
255.299	8.94122e-10	3.95519e-10	269.98	9.55461e-10	4.2841e-10	272.988	1.47701e-10	6.59075e-11	260.227	5.05012e-10	2.2872e-10	274.369	1.71145e-10	7.83427e-11	265.022	6.01042e-10	2.71485e-10	284.785	2.19449e-11	1.01303e-11	254.219	1.2791e-09	5.58557e-10	268.593	6.82973e-11	3.12526e-11	269.989	1.26096e-09	5.62599e-10	281.065	1.12376e-10	5.00264e-11
255.599	1.03029e-09	4.54102e-10	270.269	1.09739e-09	4.90367e-10	273.275	1.6934e-10	7.5302e-11	260.538	5.87308e-10	2.65025e-10	274.672	1.98605e-10	9.05932e-11	265.326	6.96132e-10	3.13314e-10	285.083	2.54312e-11	1.16994e-11	254.512	1.46549e-09	6.37652e-10	268.901	7.94935e-11	3.62459e-11	270.277	1.44643e-09	6.43129e-10	281.339	1.27903e-10	5.67548e-11
255.899	1.18653e-09	5.21065e-10	270.559	1.25976e-09	5.6099e-10	273.562	1.9405e-10	8.59906e-11	260.848	6.82609e-10	3.06907e-10	274.975	2.3034e-10	1.04698e-10	265.629	8.05809e-10	3.61379e-10	285.381	2.94552e-11	1.3504e-11	254.804	1.67815e-09	7.27555e-10	269.21	9.24707e-11	4.20118e-11	270.565	1.65835e-09	7.34803e-10	281.613	1.45511e-10	6.43586e-11
256.199	1.36572e-09	5.97564e-10	270.848	1.44541e-09	6.41449e-10	273.85	2.22254e-10	9.81451e-11	261.159	7.92904e-10	3.55191e-10	275.279	2.66995e-10	1.2093e-10	265.933	9.32239e-10	4.16575e-10	285.679	3.40974e-11	1.55783e-11	255.096	1.92066e-09	8.29686e-10	269.519	1.07503e-10	4.86655e-11	270.854	1.90035e-09	8.39107e-10	281.886	1.65469e-10	7.29476e-11
256.499	1.57109e-09	6.84903e-10	271.137	1.65758e-09	7.33064e-10	274.137	2.54427e-10	1.11959e-10	261.469	9.20473e-10	4.1082e-10	275.582	3.09308e-10	1.39596e-10	266.236	1.07789e-09	4.79923e-10	285.977	3.94497e-11	1.7961e-11	255.388	2.19707e-09	9.45645e-10	269.828	1.24906e-10	5.6339e-11	271.142	2.17655e-09	9.57716e-10	282.16	1.8808e-10	8.26451e-11
256.799	1.80635e-09	7.84561e-10	271.427	1.89993e-09	8.37327e-10	274.424	2.91109e-10	1.27651e-10	261.78	1.06793e-09	4.74873e-10	275.885	3.58125e-10	1.6105e-10	266.54	1.2456e-09	5.52582e-10	286.275	4.56171e-11	2.06967e-11	255.681	2.51194e-09	1.07723e-09	270.137	1.45041e-10	6.51832e-11	271.431	2.49163e-09	1.09252e-09	282.433	2.13684e-10	9.35888e-11
257.098	2.07568e-09	8.98208e-10	271.716	2.1766e-09	9.5592e-10	274.712	3.32911e-10	1.45465e-10	262.09	1.23828e-09	5.48577e-10	276.188	4.1441e-10	1.85693e-10	266.843	1.43859e-09	6.35871e-10	286.573	5.27199e-11	2.38357e-11	255.973	2.87042e-09	1.22646e-09	270.446	1.68322e-10	7.53702e-11	271.719	2.85087e-09	1.24565e-09	282.707	2.42667e-10	1.05933e-10
257.398	2.38386e-09	1.02773e-09	272.006	2.4923e-09	1.09074e-09	274.999	3.80521e-10	1.65679e-10	262.401	1.43494e-09	6.33334e-10	276.491	4.79271e-10	2.13983e-10	267.147	1.66053e-09	7.3129e-10	286.871	6.08955e-11	2.74354e-11	256.265	3.27836e-09	1.39561e-09	270.755	1.95226e-10	8.70967e-11	272.007	3.26025e-09	1.41949e-09	282.981	2.75457e-10	1.19851e-10
257.698	2.73627e-09	1.17526e-09	272.295	2.85232e-09	1.24392e-09	275.286	4.34719e-10	1.88604e-10	262.711	1.66185e-09	7.3074e-10	276.794	5.5397e-10	2.46439e-10	267.45	1.91563e-09	8.40537e-10	287.169	7.03004e-11	3.1561e-11	256.558	3.7423e-09	1.58724e-09	271.064	2.26296e-10	1.00587e-10	272.296	3.72652e-09	1.61676e-09	283.254	3.12538e-10	1.35535e-10
257.998	3.13905e-09	1.34321e-09	272.585	3.2627e-09	1.41787e-09	275.574	4.96384e-10	2.14588e-10	263.022	1.9235e-09	8.42612e-10	277.097	6.39949e-10	2.83654e-10	267.754	2.20867e-09	9.65544e-10	287.467	8.11135e-11	3.62866e-11	256.85	4.26966e-09	1.8042e-09	271.373	2.62158e-10	1.16097e-10	272.584	4.25731e-09	1.84048e-09	283.528	3.54452e-10	1.53201e-10
258.298	3.59911e-09	1.53428e-09	272.874	3.73022e-09	1.61531e-09	275.861	5.66508e-10	2.44024e-10	263.332	2.22502e-09	9.71018e-10	277.4	7.38854e-10	3.26298e-10	268.057	2.5451e-09	1.1085e-09	287.765	9.35386e-11	4.16965e-11	257.142	4.86878e-09	2.04972e-09	271.681	3.03524e-10	1.33917e-10	272.873	4.86123e-09	2.09406e-09	283.801	4.01808e-10	1.73091e-10
258.598	4.12432e-09	1.75153e-09	273.163	4.26256e-09	1.83927e-09	276.149	6.46209e-10	2.77352e-10	263.643	2.57228e-09	1.11831e-09	277.703	8.52562e-10	3.75135e-10	268.361	2.93111e-09	1.27187e-09	288.063	1.07808e-10	4.7886e-11	257.434	5.54906e-09	2.32739e-09	271.99	3.51211e-10	1.54379e-10	273.161	5.548e-09	2.38133e-09	284.075	4.55288e-10	1.95474e-10
258.898	4.72356e-09	1.99841e-09	273.453	4.86839e-09	2.09319e-09	276.436	7.36749e-10	3.15068e-10	263.953	2.97197e-09	1.28716e-09	278.007	9.83212e-10	4.3103e-10	268.664	3.37375e-09	1.45848e-09	288.361	1.24187e-10	5.49635e-11	257.727	6.32109e-09	2.64125e-09	272.299	4.06151e-10	1.7786e-10	273.449	6.32858e-09	2.70659e-09	284.349	5.15655e-10	2.20651e-10
259.197	5.40687e-09	2.27878e-09	273.742	5.5575e-09	2.38092e-09	276.723	8.39547e-10	3.57725e-10	264.264	3.43172e-09	1.48059e-09	278.31	1.13324e-09	4.94967e-10	268.968	3.88104e-09	1.67149e-09	288.659	1.42976e-10	6.30517e-11	258.019	7.19675e-09	2.99582e-09	272.608	4.69409e-10	2.04789e-10	273.738	7.21531e-09	3.07468e-09	284.622	5.83767e-10	2.48956e-10
259.497	6.18561e-09	2.597e-09	274.032	6.34093e-09	2.70678e-09	277.011	9.56201e-10	4.05944e-10	264.575	3.96025e-09	1.70206e-09	278.613	1.30543e-09	5.68056e-10	269.271	4.46209e-09	1.9145e-09	288.957	1.64517e-10	7.22895e-11	258.311	8.18943e-09	3.39615e-09	272.917	5.42201e-10	2.35653e-10	274.026	8.2221e-09	3.491e-09	284.896	6.60582e-10	2.80764e-10
259.797	7.07258e-09	2.95798e-09	274.321	7.23111e-09	3.07564e-09	277.298	1.08851e-09	4.60422e-10	264.885	4.56746e-09	1.95545e-09	278.916	1.50292e-09	6.51559e-10	269.575	5.12722e-09	2.19156e-09	289.255	1.89201e-10	8.28343e-11	258.604	9.31415e-09	3.8479e-09	273.226	6.25913e-10	2.71005e-10	274.315	9.36462e-09	3.96161e-09	285.169	7.4717e-10	3.16491e-10
260.097	8.08227e-09	3.36721e-09	274.611	8.24207e-09	3.49293e-09	277.585	1.2385e-09	5.21938e-10	265.196	5.26464e-09	2.2452e-09	279.219	1.72932e-09	7.46901e-10	269.878	5.88816e-09	2.50725e-09	289.553	2.1747e-10	9.48641e-11	258.896	1.05878e-08	4.3574e-09	273.535	7.22124e-10	3.11471e-10	274.603	1.06605e-08	4.49332e-09	285.443	8.44733e-10	3.56603e-10
260.397	9.23098e-09	3.83086e-09	274.9	9.3896e-09	3.96475e-09	277.873	1.40843e-09	5.91362e-10	265.506	6.06464e-09	2.5763e-09	279.522	1.98869e-09	8.55696e-10	270.182	6.75822e-09	2.86675e-09	289.851	2.49826e-10	1.0858e-10	259.188	1.20293e-08	4.93169e-09	273.844	8.32635e-10	3.57763e-10	274.891	1.21295e-08	5.09372e-09	285.716	9.54611e-10	4.01614e-10
260.697	1.05371e-08	4.35588e-09	275.189	1.06914e-08	4.49796e-09	278.16	1.60087e-09	6.69669e-10	265.817	6.98205e-09	2.95442e-09	279.825	2.28567e-09	9.79768e-10	270.485	7.75244e-09	3.27589e-09	290.149	2.86839e-10	1.24209e-10	259.481	1.36599e-08	5.57866e-09	274.153	9.59494e-10	4.10687e-10	275.18	1.37939e-08	5.77133e-09	285.99	1.0783e-09	4.521e-10
260.997	1.20214e-08	4.95002e-09	275.479	1.21676e-08	5.10021e-09	278.447	1.81868e-09	7.57947e-10	266.127	8.03347e-09	3.38597e-09	280.128	2.62551e-09	1.12118e-09	270.789	8.88789e-09	3.74124e-09	290.447	3.29156e-10	1.42008e-10	259.773	1.55035e-08	6.3071e-09	274.462	1.10503e-09	4.71155e-10	275.468	1.56788e-08	6.53566e-09	286.264	1.21748e-09	5.08702e-10
261.297	1.37072e-08	5.622e-09	275.768	1.38405e-08	5.78007e-09	278.735	2.06507e-09	8.57413e-10	266.438	9.23772e-09	3.87818e-09	280.431	3.01418e-09	1.28225e-09	271.092	1.01839e-08	4.2702e-09	290.745	3.77511e-10	1.62267e-10	260.065	1.75866e-08	7.12681e-09	274.77	1.2719e-09	5.40199e-10	275.757	1.78122e-08	7.39734e-09	286.537	1.37401e-09	5.72129e-10
261.596	1.56208e-08	6.38154e-09	276.058	1.57355e-08	6.54712e-09	279.022	2.34365e-09	9.69423e-10	266.748	1.06162e-08	4.43922e-09	280.735	3.45842e-09	1.4656e-09	271.396	1.16623e-08	4.87111e-09	291.043	4.32732e-10	1.85312e-10	260.357	1.99392e-08	8.0487e-09	275.079	1.4631e-09	6.18986e-10	276.045	2.02256e-08	8.36825e-09	286.811	1.54997e-09	6.43171e-10
261.896	1.77917e-08	7.23957e-09	276.347	1.78807e-08	7.41208e-09	279.31	2.65845e-09	1.09549e-09	267.059	1.21931e-08	5.07832e-09	281.038	3.96589e-09	1.6742e-09	271.699	1.33477e-08	5.55334e-09	291.341	4.95761e-10	2.11511e-10	260.65	2.25947e-08	9.08494e-09	275.388	1.68205e-09	7.08835e-10	276.333	2.29543e-08	9.46163e-09	287.084	1.7477e-09	7.22705e-10
262.196	2.0253e-08	8.20827e-09	276.637	2.03082e-08	8.38691e-09	279.597	3.01401e-09	1.2373e-09	267.369	1.3996e-08	5.80587e-09	281.341	4.54525e-09	1.91137e-09	272.003	1.5268e-08	6.32743e-09	291.639	5.67659e-10	2.41278e-10	260.942	2.55904e-08	1.02491e-08	275.697	1.93264e-09	8.11234e-10	276.622	2.60379e-08	1.06923e-08	287.358	1.96977e-09	8.11705e-10
262.496	2.3042e-08	9.30127e-09	276.926	2.30534e-08	9.48499e-09	279.884	3.41539e-09	1.39674e-09	267.68	1.60558e-08	6.63358e-09	281.644	5.2063e-09	2.18087e-09	272.306	1.74548e-08	7.20522e-09	291.937	6.49631e-10	2.75081e-10	261.234	2.89682e-08	1.15561e-08	276.006	2.21925e-09	9.27864e-10	276.91	2.95208e-08	1.20767e-08	287.632	2.21908e-09	9.1125e-10
262.796	2.62007e-08	1.05338e-08	277.215	2.61565e-08	1.07212e-08	280.172	3.86824e-09	1.57589e-09	267.99	1.84079e-08	7.57466e-09	281.947	5.96011e-09	2.48692e-09	272.61	1.99435e-08	8.2e-09	292.235	7.43034e-10	3.13442e-10	261.527	3.27747e-08	1.30228e-08	276.315	2.54687e-09	1.06062e-09	277.199	3.34526e-08	1.36331e-08	287.905	2.49884e-09	1.02254e-09
263.096	2.97758e-08	1.19228e-08	277.505	2.96621e-08	1.21122e-08	280.459	4.37892e-09	1.77709e-09	268.301	2.10921e-08	8.64394e-09	282.25	6.81921e-09	2.83426e-09	272.913	2.27741e-08	9.32668e-09	292.532	8.49403e-10	3.56953e-10	261.819	3.7062e-08	1.46677e-08	276.624	2.92113e-09	1.21163e-09	277.487	3.78887e-08	1.53822e-08	288.179	2.81261e-09	1.1469e-09
263.396	3.38201e-08	1.34873e-08	277.794	3.36205e-08	1.36765e-08	280.746	4.95449e-09	2.00292e-09	268.611	2.41532e-08	9.85811e-09	282.553	7.79772e-09	3.22822e-09	273.217	2.59918e-08	1.0602e-08	292.83	9.7047e-10	4.06276e-10	262.111	4.18882e-08	1.65114e-08	276.933	3.34843e-09	1.38331e-09	277.775	4.28914e-08	1.73465e-08	288.452	3.1644e-09	1.2858e-09
263.695	3.83925e-08	1.52483e-08	278.084	3.80878e-08	1.54347e-08	281.034	5.60286e-09	2.25627e-09	268.922	2.76422e-08	1.1236e-08	282.856	8.9116e-09	3.67481e-09	273.52	2.96473e-08	1.20446e-08	293.128	1.10819e-09	4.62155e-10	262.403	4.73181e-08	1.85769e-08	277.242	3.83597e-09	1.57835e-09	278.064	4.853e-08	1.95514e-08	288.726	3.5586e-09	1.44086e-09
263.995	4.35588e-08	1.72294e-08	278.373	4.31268e-08	1.74099e-08	281.321	6.33286e-09	2.54032e-09	269.232	3.16164e-08	1.27985e-08	283.159	1.01788e-08	4.18072e-09	273.824	3.37978e-08	1.36756e-08	293.426	1.26476e-09	5.25423e-10	262.696	5.3424e-08	2.08895e-08	277.55	4.39192e-09	1.79981e-09	278.352	5.4882e-08	2.2025e-08	289	4.00015e-09	1.61389e-09
264.295	4.93931e-08	1.94568e-08	278.663	4.88076e-08	1.96275e-08	281.608	7.15433e-09	2.85863e-09	269.543	3.61406e-08	1.45694e-08	283.463	1.16197e-08	4.75352e-09	274.127	3.85075e-08	1.55183e-08	293.724	1.44267e-09	5.97018e-10	262.988	6.02863e-08	2.34772e-08	277.859	5.02549e-09	2.05109e-09	278.641	6.20338e-08	2.47986e-08	289.273	4.49449e-09	1.80689e-09
264.595	5.59779e-08	2.19595e-08	278.952	5.52086e-08	2.21159e-08	281.896	8.07825e-09	3.21514e-09	269.853	4.12875e-08	1.65752e-08	283.766	1.3257e-08	5.40163e-09	274.431	4.38488e-08	1.7599e-08	294.022	1.6447e-09	6.77987e-10	263.28	6.79945e-08	2.63713e-08	278.168	5.74708e-09	2.33603e-09	278.929	7.00821e-08	2.79068e-08	289.547	5.0477e-09	2.02204e-09
264.895	6.34053e-08	2.47699e-08	279.241	6.24174e-08	2.49068e-08	282.183	9.11684e-09	3.6142e-09	270.164	4.71395e-08	1.88456e-08	284.069	1.51164e-08	6.13452e-09	274.734	4.99027e-08	1.99471e-08	294.32	1.87401e-09	7.69505e-10	263.573	7.66482e-08	2.96061e-08	278.477	6.56841e-09	2.65894e-09	279.217	7.91343e-08	3.13881e-08	289.82	5.66651e-09	2.26179e-09
265.195	7.17786e-08	2.79241e-08	279.531	7.05316e-08	2.80352e-08	282.471	1.02837e-08	4.06066e-09	270.474	5.37889e-08	2.14137e-08	284.372	1.72269e-08	6.96278e-09	275.038	5.67603e-08	2.25953e-08	294.618	2.13412e-09	8.72886e-10	263.865	8.63582e-08	3.32198e-08	278.786	7.50271e-09	3.02466e-09	279.506	8.93105e-08	3.52852e-08	290.094	6.35837e-09	2.52882e-09
265.495	8.12127e-08	3.14618e-08	279.82	7.96603e-08	3.15399e-08	282.758	1.15941e-08	4.55986e-09	270.785	6.13398e-08	2.43169e-08	284.675	1.9621e-08	7.89824e-09	275.341	6.45238e-08	2.55801e-08	294.916	2.42901e-09	9.896e-10	264.157	9.72474e-08	3.72544e-08	279.095	8.56487e-09	3.43858e-09	279.794	1.00744e-07	3.96453e-08	290.368	7.13156e-09	2.82609e-09
265.794	9.18359e-08	3.54274e-08	280.11	8.99247e-08	3.54642e-08	283.045	1.30647e-08	5.11774e-09	271.095	6.99092e-08	2.75967e-08	284.978	2.23351e-08	8.95415e-09	275.645	7.33077e-08	2.89423e-08	295.214	2.76315e-09	1.12129e-09	264.45	1.09453e-07	4.17564e-08	279.404	9.77165e-09	3.90678e-09	280.083	1.13584e-07	4.45209e-08	290.641	7.99525e-09	3.15688e-09
266.094	1.03791e-07	3.98701e-08	280.399	1.0146e-07	3.98558e-08	283.333	1.47145e-08	5.74085e-09	271.406	7.96284e-08	3.12997e-08	285.281	2.54102e-08	1.01453e-08	275.948	8.32403e-08	3.27272e-08	295.512	3.14153e-09	1.26979e-09	264.742	1.23125e-07	4.67772e-08	279.713	1.11419e-08	4.43603e-09	280.371	1.27995e-07	4.99698e-08	290.915	8.9596e-09	3.5248e-09
266.394	1.17238e-07	4.48441e-08	280.689	1.14417e-07	4.47677e-08	283.62	1.65641e-08	6.43643e-09	271.716	9.0645e-08	3.54777e-08	285.584	2.88924e-08	1.14881e-08	276.252	9.44653e-08	3.69855e-08	295.81	3.56979e-09	1.43715e-09	265.034	1.38434e-07	5.23733e-08	280.022	1.26969e-08	5.03392e-09	280.659	1.44162e-07	5.60561e-08	291.188	1.00358e-08	3.93381e-09
266.694	1.32354e-07	5.04097e-08	280.978	1.28964e-07	5.02585e-08	283.907	1.86367e-08	7.21249e-09	272.027	1.03124e-07	4.01887e-08	285.887	3.28332e-08	1.30011e-08	276.555	1.07143e-07	4.17733e-08	296.108	4.05422e-09	1.62565e-09	265.326	1.55564e-07	5.86072e-08	280.33	1.44603e-08	5.70892e-09	280.948	1.62288e-07	6.28508e-08	291.462	1.12364e-08	4.3883e-09
266.994	1.49336e-07	5.66336e-08	281.268	1.45286e-07	5.63932e-08	284.195	2.0958e-08	8.07786e-09	272.338	1.17252e-07	4.54973e-08	286.191	3.72904e-08	1.47048e-08	276.859	1.21454e-07	4.71534e-08	296.406	4.60188e-09	1.83785e-09	265.619	1.74724e-07	6.55477e-08	280.639	1.6459e-08	6.47049e-09	281.236	1.826e-07	7.0432e-08	291.735	1.25751e-08	4.89309e-09
267.294	1.68404e-07	6.35894e-08	281.557	1.6359e-07	6.32434e-08	284.482	2.35564e-08	9.04229e-09	272.648	1.33237e-07	5.14753e-08	286.494	4.23287e-08	1.66219e-08	277.162	1.37599e-07	5.31953e-08	296.704	5.22068e-09	2.07657e-09	265.911	1.9614e-07	7.32705e-08	280.948	1.8723e-08	7.3292e-09	281.525	2.05351e-07	7.88862e-08	292.009	1.40672e-08	5.45348e-09
267.594	1.89801e-07	7.13586e-08	281.846	1.84107e-07	7.08885e-08	284.77	2.64635e-08	1.01165e-08	272.959	1.5131e-07	5.8203e-08	286.797	4.80205e-08	1.8778e-08	277.466	1.55802e-07	5.99762e-08	297.002	5.91947e-09	2.34498e-09	266.203	2.20067e-07	8.18589e-08	281.257	2.12858e-08	8.29681e-09	281.813	2.30819e-07	8.83089e-08	292.283	1.57293e-08	6.07531e-09
267.893	2.13799e-07	8.0031e-08	282.136	2.07093e-07	7.94161e-08	285.057	2.97143e-08	1.13124e-08	273.269	1.71733e-07	6.57695e-08	287.1	5.44469e-08	2.12013e-08	277.769	1.76312e-07	6.75819e-08	297.3	6.70813e-09	2.64661e-09	266.496	2.46784e-07	9.14045e-08	281.566	2.41852e-08	9.38646e-09	282.101	2.59314e-07	9.8805e-08	292.556	1.75801e-08	6.76499e-09
268.193	2.40698e-07	8.97059e-08	282.425	2.3283e-07	8.89226e-08	285.344	3.33475e-08	1.2643e-08	273.58	1.94796e-07	7.42738e-08	287.403	6.16983e-08	2.39233e-08	278.073	1.99411e-07	7.61076e-08	297.598	7.59774e-09	2.98534e-09	266.788	2.76601e-07	1.02008e-07	281.875	2.74634e-08	1.06127e-08	282.39	2.91179e-07	1.10491e-07	292.83	1.96402e-08	7.52958e-09
268.493	2.70832e-07	1.00493e-07	282.715	2.61633e-07	9.95149e-08	285.632	3.74058e-08	1.41226e-08	273.89	2.20826e-07	8.38262e-08	287.706	6.9876e-08	2.69789e-08	278.376	2.25408e-07	8.56586e-08	297.896	8.60064e-09	3.36555e-09	267.08	3.09858e-07	1.1378e-07	282.184	3.11677e-08	1.19919e-08	282.678	3.26794e-07	1.23493e-07	293.103	2.1932e-08	8.3768e-09
268.793	3.0457e-07	1.12512e-07	283.004	2.93849e-07	1.1131e-07	285.919	4.19367e-08	1.5767e-08	274.201	2.50186e-07	9.45487e-08	288.009	7.90927e-08	3.0407e-08	278.68	2.5465e-07	9.63517e-08	298.194	9.73064e-09	3.79204e-09	267.373	3.46933e-07	1.26842e-07	282.493	3.53508e-08	1.35421e-08	282.967	3.6658e-07	1.37954e-07	293.377	2.44805e-08	9.31515e-09
269.093	3.42321e-07	1.25896e-07	283.294	3.29865e-07	1.24438e-07	286.206	4.69925e-08	1.75937e-08	274.511	2.8328e-07	1.06577e-07	288.312	8.94745e-08	3.42506e-08	278.983	2.87524e-07	1.08316e-07	298.492	1.10031e-08	4.27017e-09	267.665	3.88243e-07	1.41327e-07	282.802	4.00717e-08	1.52833e-08	283.255	4.11001e-07	1.54026e-07	293.651	2.73132e-08	1.0354e-08
269.393	3.84538e-07	1.40791e-07	283.583	3.70108e-07	1.39042e-07	286.494	5.26311e-08	1.96215e-08	274.822	3.20562e-07	1.20062e-07	288.615	1.01162e-07	3.85574e-08	279.287	3.24458e-07	1.21695e-07	298.79	1.24352e-08	4.80589e-09	267.957	4.34244e-07	1.57381e-07	283.111	4.53964e-08	1.72379e-08	283.543	4.60571e-07	1.71881e-07	293.924	3.04605e-08	1.15034e-08
269.693	4.31723e-07	1.57358e-07	283.872	4.1505e-07	1.55277e-07	286.781	5.89162e-08	2.18715e-08	275.132	3.62534e-07	1.35169e-07	288.919	1.14311e-07	4.33802e-08	279.59	3.6593e-07	1.36646e-07	299.088	1.40461e-08	5.40578e-09	268.249	4.85444e-07	1.75164e-07	283.419	5.13984e-08	1.94306e-08	283.832	5.15858e-07	1.91704e-07	294.198	3.39555e-08	1.27748e-08
269.992	4.84431e-07	1.75774e-07	284.162	4.65213e-07	1.73316e-07	287.068	6.59183e-08	2.43667e-08	275.443	4.09759e-07	1.52083e-07	289.222	1.29096e-07	4.87777e-08	279.894	4.1247e-07	1.53344e-07	299.386	1.5857e-08	6.07714e-09	268.542	5.42398e-07	1.94851e-07	283.728	5.81597e-08	2.18889e-08	284.12	5.77489e-07	2.13701e-07	294.471	3.78351e-08	1.41802e-08
270.292	5.43272e-07	1.96232e-07	284.451	5.21175e-07	1.9335e-07	287.356	7.37151e-08	2.71321e-08	275.753	4.62861e-07	1.71008e-07	289.525	1.45711e-07	5.48144e-08	280.197	4.64666e-07	1.71982e-07	299.684	1.78917e-08	6.82803e-09	268.834	6.05719e-07	2.16633e-07	284.037	6.57718e-08	2.46431e-08	284.409	6.46155e-07	2.38097e-07	294.745	4.21395e-08	1.57333e-08
270.592	6.08925e-07	2.18944e-07	284.741	5.83572e-07	2.15586e-07	287.643	8.23922e-08	3.01954e-08	276.064	5.22534e-07	1.92169e-07	289.828	1.64371e-07	6.15621e-08	280.501	5.23171e-07	1.92772e-07	299.982	2.01766e-08	7.66739e-09	269.126	6.7608e-07	2.4072e-07	284.346	7.43365e-08	2.7727e-08	284.697	7.2262e-07	2.65138e-07	295.019	4.69133e-08	1.74486e-08
270.892	6.82134e-07	2.44145e-07	285.03	6.53108e-07	2.40252e-07	287.931	9.20439e-08	3.35868e-08	276.374	5.89549e-07	2.15816e-07	290.131	1.85316e-07	6.90998e-08	280.804	5.88711e-07	2.15949e-07	300.28	2.27408e-08	8.6051e-09	269.419	7.54222e-07	2.6734e-07	284.655	8.39671e-08	3.11777e-08	284.985	8.07725e-07	2.95094e-07	295.292	5.22051e-08	1.93422e-08
271.192	7.63722e-07	2.7209e-07	285.32	7.3056e-07	2.67599e-07	288.218	1.02774e-07	3.73393e-08	276.685	6.64764e-07	2.42222e-07	290.434	2.08812e-07	7.75148e-08	281.108	6.62088e-07	2.41769e-07	300.578	2.5617e-08	9.65206e-09	269.711	8.40958e-07	2.96743e-07	284.964	9.47897e-08	3.50364e-08	285.274	9.02395e-07	3.28262e-07	295.566	5.80686e-08	2.14317e-08
271.492	8.54597e-07	3.03058e-07	285.609	8.16782e-07	2.97903e-07	288.505	1.14696e-07	4.14891e-08	276.995	7.4913e-07	2.71691e-07	290.737	2.35153e-07	8.69034e-08	281.411	7.44189e-07	2.70519e-07	300.876	2.88414e-08	1.08203e-08	270.003	9.37183e-07	3.29202e-07	285.273	1.06944e-07	3.93487e-08	285.562	1.00765e-06	3.64966e-07	295.839	6.45627e-08	2.37363e-08
271.792	9.55756e-07	3.37357e-07	285.898	9.12717e-07	3.31463e-07	288.793	1.27937e-07	4.60756e-08	277.306	8.43702e-07	3.04557e-07	291.04	2.64668e-07	9.73717e-08	281.715	8.36e-07	3.02509e-07	301.174	3.2454e-08	1.21232e-08	270.295	1.04387e-06	3.65015e-07	285.582	1.20586e-07	4.41647e-08	285.851	1.12461e-06	4.0556e-07	296.113	7.17518e-08	2.6277e-08
272.091	1.0683e-06	3.75321e-07	286.188	1.0194e-06	3.68609e-07	289.08	1.42633e-07	5.1142e-08	277.616	9.49648e-07	3.41187e-07	291.343	2.97718e-07	1.09037e-07	282.018	9.38607e-07	3.38084e-07	301.472	3.64993e-08	1.35753e-08	270.588	1.16211e-06	4.04503e-07	285.891	1.35889e-07	4.95398e-08	286.139	1.25452e-06	4.50431e-07	296.387	7.97069e-08	2.90766e-08
272.391	1.19344e-06	4.17317e-07	286.477	1.13798e-06	4.09703e-07	289.367	1.58937e-07	5.67354e-08	277.927	1.06826e-06	3.81987e-07	291.647	3.34706e-07	1.22028e-07	282.322	1.05321e-06	3.7762e-07	301.77	4.10266e-08	1.51927e-08	270.88	1.29306e-06	4.48022e-07	286.199	1.53044e-07	5.55351e-08	286.427	1.39872e-06	5.00003e-07	296.66	8.85056e-08	3.21601e-08
272.691	1.33249e-06	4.63744e-07	286.767	1.26972e-06	4.55137e-07	289.655	1.77014e-07	6.29072e-08	278.237	1.20098e-06	4.274e-07	291.95	3.76077e-07	1.36486e-07	282.625	1.18115e-06	4.21533e-07	302.068	4.60905e-08	1.69934e-08	271.172	1.43803e-06	4.95954e-07	286.508	1.72262e-07	6.22179e-08	286.716	1.5587e-06	5.54737e-07	296.934	9.8233e-08	3.55547e-08
272.991	1.48693e-06	5.15039e-07	287.056	1.41598e-06	5.05343e-07	289.942	1.97048e-07	6.97133e-08	278.548	1.34938e-06	4.77916e-07	292.253	4.22321e-07	1.52567e-07	282.929	1.32388e-06	4.70275e-07	302.366	5.17514e-08	1.89968e-08	271.465	1.59842e-06	5.48717e-07	286.817	1.93781e-07	6.96621e-08	287.004	1.73611e-06	6.15139e-07	297.207	1.08982e-07	3.92901e-08
273.291	1.65835e-06	5.71677e-07	287.346	1.57829e-06	5.60791e-07	290.229	2.19237e-07	7.72148e-08	278.858	1.51522e-06	5.34072e-07	292.556	4.73984e-07	1.70442e-07	283.232	1.48301e-06	5.24344e-07	302.664	5.80761e-08	2.12245e-08	271.757	1.77577e-06	6.06765e-07	287.126	2.17859e-07	7.79493e-08	287.293	1.93272e-06	6.81757e-07	297.481	1.20856e-07	4.33985e-08
273.591	1.84852e-06	6.34178e-07	287.635	1.75831e-06	6.21995e-07	290.517	2.438e-07	8.54781e-08	279.169	1.70044e-06	5.96456e-07	292.859	5.31666e-07	1.90299e-07	283.536	1.66034e-06	5.84287e-07	302.962	6.51385e-08	2.37001e-08	272.049	1.97178e-06	6.7059e-07	287.435	2.44785e-07	8.71689e-08	287.581	2.15052e-06	7.55191e-07	297.754	1.33965e-07	4.79152e-08
273.891	2.05935e-06	7.03105e-07	287.924	1.95788e-06	6.89514e-07	290.804	2.70978e-07	9.45754e-08	279.48	1.90715e-06	6.65713e-07	293.162	5.96031e-07	2.12344e-07	283.839	1.85783e-06	6.50699e-07	303.26	7.30202e-08	2.64495e-08	272.342	2.18829e-06	7.40728e-07	287.744	2.74877e-07	9.74191e-08	287.869	2.39165e-06	8.36093e-07	298.028	1.48432e-07	5.28783e-08
274.19	2.29296e-06	7.79074e-07	288.214	2.17899e-06	7.63959e-07	291.092	3.01032e-07	1.04585e-07	279.79	2.13773e-06	7.42551e-07	293.465	6.67809e-07	2.36803e-07	284.143	2.07763e-06	7.24234e-07	303.558	8.18114e-08	2.95014e-08	272.634	2.42732e-06	8.1776e-07	288.053	3.08487e-07	1.08808e-07	288.158	2.65846e-06	9.25173e-07	298.302	1.6439e-07	5.83295e-08
274.49	2.55167e-06	8.62752e-07	288.503	2.42385e-06	8.45994e-07	291.379	3.34249e-07	1.15593e-07	280.101	2.39476e-06	8.27744e-07	293.768	7.47807e-07	2.63924e-07	284.446	2.32213e-06	8.05604e-07	303.856	9.16115e-08	3.2887e-08	272.926	2.69106e-06	9.02314e-07	288.362	3.46003e-07	1.21454e-07	288.446	2.95355e-06	1.0232e-06	298.575	1.81986e-07	6.43141e-08
274.79	2.83799e-06	9.54866e-07	288.793	2.69485e-06	9.36343e-07	291.666	3.70943e-07	1.27692e-07	280.411	2.68111e-06	9.22138e-07	294.071	8.36915e-07	2.93977e-07	284.75	2.59394e-06	8.9559e-07	304.154	1.0253e-07	3.66406e-08	273.218	2.98191e-06	9.95071e-07	288.671	3.87854e-07	1.35486e-07	288.734	3.27974e-06	1.13102e-06	298.849	2.01378e-07	7.08811e-08
275.09	3.1547e-06	1.0562e-06	289.082	2.99464e-06	1.03579e-06	291.954	4.11456e-07	1.40981e-07	280.722	2.99991e-06	1.02666e-06	294.375	9.36111e-07	3.27258e-07	285.053	2.89593e-06	9.9504e-07	304.452	1.14688e-07	4.07997e-08	273.511	3.30249e-06	1.09677e-06	288.98	4.34511e-07	1.51046e-07	289.023	3.6401e-06	1.24954e-06	299.122	2.22741e-07	7.80839e-08
275.39	3.50482e-06	1.16762e-06	289.372	3.3261e-06	1.1452e-06	292.241	4.56162e-07	1.55571e-07	281.032	3.35462e-06	1.14231e-06	294.678	1.04647e-06	3.64091e-07	285.357	3.23126e-06	1.10488e-06	304.75	1.28218e-07	4.54054e-08	273.803	3.65565e-06	1.20821e-06	289.288	4.86495e-07	1.68291e-07	289.311	4.03802e-06	1.37975e-06	299.396	2.46265e-07	8.59804e-08
275.69	3.89165e-06	1.29004e-06	289.661	3.69237e-06	1.26549e-06	292.528	5.05468e-07	1.7158e-07	281.343	3.74905e-06	1.27021e-06	294.981	1.16918e-06	4.04831e-07	285.66	3.60338e-06	1.22613e-06	305.048	1.43268e-07	5.05028e-08	274.095	4.04447e-06	1.33025e-06	289.597	5.44379e-07	1.87388e-07	289.6	4.47716e-06	1.52271e-06	299.67	2.72155e-07	9.46335e-08
275.99	4.31879e-06	1.42447e-06	289.95	4.09691e-06	1.39768e-06	292.816	5.59819e-07	1.89134e-07	281.653	4.18736e-06	1.41154e-06	295.284	1.30554e-06	4.49863e-07	285.964	4.0161e-06	1.35988e-06	305.346	1.59997e-07	5.61409e-08	274.388	4.47234e-06	1.46383e-06	289.906	6.08791e-07	2.08525e-07	289.888	4.96156e-06	1.67961e-06	299.943	3.00639e-07	1.04111e-07
276.289	4.79017e-06	1.572e-06	290.24	4.54346e-06	1.54287e-06	293.103	6.19698e-07	2.08374e-07	281.964	4.67414e-06	1.56762e-06	295.587	1.45698e-06	4.99608e-07	286.267	4.47357e-06	1.50733e-06	305.644	1.78584e-07	6.23735e-08	274.68	4.94293e-06	1.60995e-06	290.215	6.80424e-07	2.31903e-07	290.176	5.49558e-06	1.85169e-06	300.217	3.31962e-07	1.14487e-07
276.589	5.31007e-06	1.73381e-06	290.529	5.03614e-06	1.70223e-06	293.39	6.85634e-07	2.29449e-07	282.274	5.21441e-06	1.73988e-06	295.89	1.62506e-06	5.54524e-07	286.571	4.98035e-06	1.66978e-06	305.942	1.99223e-07	6.92593e-08	274.972	5.4602e-06	1.7697e-06	290.524	7.60039e-07	2.57743e-07	290.465	6.08401e-06	2.04032e-06	300.49	3.66391e-07	1.25842e-07
276.889	5.88315e-06	1.91116e-06	290.819	5.57941e-06	1.87705e-06	293.678	7.58199e-07	2.5252e-07	282.585	5.81367e-06	1.92986e-06	296.193	1.81151e-06	6.15113e-07	286.874	5.5414e-06	1.84865e-06	306.24	2.22127e-07	7.68622e-08	275.264	6.02849e-06	1.94424e-06	290.833	8.48471e-07	2.86285e-07	290.753	6.73203e-06	2.24697e-06	300.764	4.04218e-07	1.38261e-07
277.189	6.51448e-06	2.10543e-06	291.108	6.17817e-06	2.06873e-06	293.965	8.38018e-07	2.77762e-07	282.895	6.47795e-06	2.13925e-06	296.496	2.0182e-06	6.81917e-07	287.178	6.1622e-06	2.04547e-06	306.538	2.47531e-07	8.5252e-08	275.557	6.6525e-06	2.13485e-06	291.142	9.46636e-07	3.17793e-07	291.042	7.4453e-06	2.47324e-06	301.038	4.45759e-07	1.51839e-07
277.489	7.20958e-06	2.31811e-06	291.398	6.83772e-06	2.27878e-06	294.253	9.2577e-07	3.05365e-07	283.206	7.21385e-06	2.36988e-06	296.799	2.24721e-06	7.55527e-07	287.481	6.84868e-06	2.26191e-06	306.836	2.75693e-07	9.45048e-08	275.849	7.33731e-06	2.34287e-06	291.451	1.05554e-06	3.52551e-07	291.33	8.22999e-06	2.72085e-06	301.311	4.9136e-07	1.66676e-07
277.789	7.97445e-06	2.55078e-06	291.687	7.56385e-06	2.50883e-06	294.54	1.02219e-06	3.35532e-07	283.516	8.02858e-06	2.62373e-06	297.103	2.50079e-06	8.36587e-07	287.785	7.60736e-06	2.49978e-06	307.134	3.06894e-07	1.04703e-07	276.141	8.08844e-06	2.56978e-06	291.76	1.17627e-06	3.9087e-07	291.618	9.09278e-06	2.99166e-06	301.585	5.41395e-07	1.82883e-07
278.089	8.81561e-06	2.80519e-06	291.976	8.36286e-06	2.76064e-06	294.827	1.12808e-06	3.68481e-07	283.827	8.93001e-06	2.90296e-06	297.406	2.78141e-06	9.25793e-07	288.088	8.44533e-06	2.76104e-06	307.432	3.41442e-07	1.15937e-07	276.434	8.91187e-06	2.81713e-06	292.068	1.31005e-06	4.33086e-07	291.907	1.00409e-05	3.28769e-06	301.858	5.96271e-07	2.00576e-07
278.388	9.74013e-06	3.08317e-06	292.266	9.2416e-06	3.0361e-06	295.115	1.2443e-06	4.0445e-07	284.137	9.92675e-06	3.20991e-06	297.709	3.09177e-06	1.0239e-06	288.392	9.37032e-06	3.04779e-06	307.73	3.79676e-07	1.28305e-07	276.726	9.81408e-06	3.08663e-06	292.377	1.45819e-06	4.79565e-07	292.195	1.10824e-05	3.61108e-06	302.132	6.56429e-07	2.19885e-07
278.688	1.07557e-05	3.38674e-06	292.555	1.02075e-05	3.33728e-06	295.402	1.3718e-06	4.43692e-07	284.448	1.10282e-05	3.54708e-06	298.012	3.43481e-06	1.13174e-06	288.695	1.03908e-05	3.36234e-06	308.028	4.21965e-07	1.41914e-07	277.018	1.08021e-05	3.38008e-06	292.686	1.62212e-06	5.30704e-07	292.484	1.22256e-05	3.96418e-06	302.405	7.22349e-07	2.40945e-07
278.988	1.18706e-05	3.71803e-06	292.845	1.12687e-05	3.66639e-06	295.689	1.5116e-06	4.8648e-07	284.758	1.22446e-05	3.91722e-06	298.315	3.81376e-06	1.25018e-06	288.999	1.15159e-05	3.70716e-06	308.326	4.68713e-07	1.56878e-07	277.311	1.18834e-05	3.69942e-06	292.995	1.80342e-06	5.86934e-07	292.772	1.348e-05	4.3495e-06	302.679	7.94551e-07	2.63907e-07
279.288	1.30938e-05	4.07936e-06	293.134	1.24339e-05	4.02582e-06	295.977	1.6648e-06	5.3311e-07	285.069	1.35871e-05	4.32328e-06	298.618	4.23212e-06	1.3802e-06	289.302	1.27557e-05	4.08492e-06	308.624	5.20362e-07	1.73323e-07	277.603	1.30662e-05	4.04675e-06	293.304	2.0038e-06	6.4872e-07	293.06	1.48556e-05	4.76973e-06	302.953	8.73599e-07	2.88929e-07
279.588	1.44351e-05	4.4732e-06	293.424	1.37126e-05	4.41813e-06	296.264	1.83259e-06	5.83896e-07	285.379	1.50678e-05	4.76844e-06	298.921	4.69371e-06	1.52284e-06	289.606	1.41209e-05	4.49852e-06	308.922	5.77393e-07	1.91386e-07	277.895	1.43594e-05	4.42429e-06	293.613	2.22515e-06	7.16566e-07	293.349	1.63633e-05	5.22779e-06	303.226	9.60104e-07	3.16185e-07
279.888	1.59051e-05	4.90221e-06	293.713	1.51152e-05	4.8461e-06	296.551	2.01627e-06	6.39178e-07	285.69	1.66999e-05	5.25614e-06	299.224	5.2027e-06	1.67922e-06	289.909	1.56236e-05	4.95106e-06	309.22	6.40333e-07	2.11213e-07	278.187	1.57725e-05	4.83444e-06	293.922	2.46949e-06	7.91019e-07	293.637	1.80149e-05	5.72678e-06	303.5	1.05473e-06	3.45859e-07
280.188	1.75151e-05	5.36924e-06	294.002	1.66529e-05	5.3127e-06	296.839	2.21723e-06	6.99318e-07	286	1.84978e-05	5.79008e-06	299.528	5.76362e-06	1.85055e-06	290.213	1.72764e-05	5.44591e-06	309.518	7.09755e-07	2.32965e-07	278.48	1.73158e-05	5.27976e-06	294.231	2.73905e-06	8.72666e-07	293.926	1.98231e-05	6.27007e-06	303.773	1.15819e-06	3.78152e-07
280.487	1.92775e-05	5.87734e-06	294.292	1.83377e-05	5.82112e-06	297.126	2.43698e-06	7.64705e-07	286.311	2.04772e-05	6.37427e-06	299.831	6.3814e-06	2.03814e-06	290.516	1.90933e-05	5.98666e-06	309.816	7.86283e-07	2.56815e-07	278.772	1.90002e-05	5.76299e-06	294.54	3.03625e-06	9.62144e-07	294.214	2.18019e-05	6.86124e-06	304.047	1.27126e-06	4.13279e-07
280.787	2.12055e-05	6.42978e-06	294.581	2.01828e-05	6.3748e-06	297.414	2.67714e-06	8.35758e-07	286.622	2.26549e-05	7.01298e-06	300.134	7.06141e-06	2.24341e-06	290.82	2.10895e-05	6.57721e-06	310.114	8.706e-07	2.82949e-07	279.064	2.08379e-05	6.28704e-06	294.849	3.36372e-06	1.06014e-06	294.502	2.39661e-05	7.50414e-06	304.321	1.39477e-06	4.51471e-07
281.087	2.33135e-05	7.03005e-06	294.871	2.22022e-05	6.97743e-06	297.701	2.93949e-06	9.12921e-07	286.932	2.50493e-05	7.71085e-06	300.437	7.80946e-06	2.46788e-06	291.123	2.32813e-05	7.22174e-06	310.412	9.63445e-07	3.1157e-07	279.357	2.28416e-05	6.85504e-06	295.157	3.72432e-06	1.16739e-06	294.791	2.63318e-05	8.20292e-06	304.594	1.52965e-06	4.92975e-07
281.387	2.5617e-05	7.68188e-06	295.16	2.44115e-05	7.63296e-06	297.988	3.22589e-06	9.96673e-07	287.243	2.76803e-05	8.47283e-06	300.74	8.63186e-06	2.71319e-06	291.427	2.56864e-05	7.92472e-06	310.71	1.06562e-06	3.42895e-07	279.649	2.50252e-05	7.47033e-06	295.466	4.12116e-06	1.28469e-06	295.079	2.89164e-05	8.96199e-06	304.868	1.67685e-06	5.38059e-07
281.687	2.81326e-05	8.38926e-06	295.45	2.68269e-05	8.34562e-06	298.276	3.53841e-06	1.08752e-06	287.553	3.05694e-05	9.30426e-06	301.043	9.53547e-06	2.98111e-06	291.73	2.83241e-05	8.69098e-06	311.008	1.17802e-06	3.77162e-07	279.941	2.74034e-05	8.13644e-06	295.775	4.55759e-06	1.4129e-06	295.368	3.17387e-05	9.78608e-06	305.141	1.83745e-06	5.87009e-07
281.987	3.08782e-05	9.15643e-06	295.739	2.94665e-05	9.11996e-06	298.563	3.87923e-06	1.18602e-06	287.864	3.37401e-05	1.02108e-05	301.346	1.05277e-05	3.27351e-06	292.034	3.12151e-05	9.52567e-06	311.306	1.30157e-06	4.14623e-07	280.233	2.99923e-05	8.85717e-06	296.084	5.03729e-06	1.55295e-06	295.656	3.48189e-05	1.06802e-05	305.415	2.01259e-06	6.40132e-07
282.287	3.38732e-05	9.98793e-06	296.028	3.23495e-05	9.96083e-06	298.85	4.25072e-06	1.29273e-06	288.174	3.72175e-05	1.11987e-05	301.649	1.16166e-05	3.59245e-06	292.337	3.43819e-05	1.04343e-05	311.604	1.43732e-06	4.55554e-07	280.526	3.2809e-05	9.63653e-06	296.393	5.5642e-06	1.70581e-06	295.944	3.81787e-05	1.16499e-05	305.689	2.20349e-06	6.97756e-07
282.586	3.71382e-05	1.08886e-05	296.318	3.54966e-05	1.08734e-05	299.138	4.65541e-06	1.40829e-06	288.485	4.1029e-05	1.22744e-05	301.952	1.28109e-05	3.9401e-06	292.641	3.78487e-05	1.14229e-05	311.902	1.58639e-06	5.0025e-07	280.818	3.58719e-05	1.04788e-05	296.702	6.14262e-06	1.87255e-06	296.233	4.18415e-05	1.27008e-05	305.962	2.41148e-06	7.60236e-07
282.886	4.06956e-05	1.18635e-05	296.607	3.89302e-05	1.18633e-05	299.425	5.09604e-06	1.53335e-06	288.795	4.52039e-05	1.34449e-05	302.256	1.412e-05	4.3188e-06	292.944	4.16417e-05	1.24977e-05	312.2	1.75e-06	5.49028e-07	281.11	3.92007e-05	1.13886e-05	297.011	6.77719e-06	2.0543e-06	296.521	4.58327e-05	1.3839e-05	306.236	2.638e-06	8.27948e-07
283.186	4.45692e-05	1.29182e-05	296.897	4.26744e-05	1.29363e-05	299.712	5.57554e-06	1.66862e-06	289.106	4.97741e-05	1.47177e-05	302.559	1.5554e-05	4.73107e-06	293.248	4.57892e-05	1.36655e-05	312.498	1.92946e-06	6.02231e-07	281.403	4.28166e-05	1.23706e-05	297.32	7.47291e-06	2.2523e-06	296.81	5.01792e-05	1.50713e-05	306.509	2.88458e-06	9.01298e-07
283.486	4.87848e-05	1.40584e-05	297.186	4.6755e-05	1.40989e-05	300	6.09706e-06	1.81484e-06	289.416	5.47737e-05	1.61008e-05	302.862	1.7124e-05	5.17958e-06	293.551	5.03214e-05	1.49335e-05	312.796	2.1262e-06	6.60227e-07	281.695	4.67422e-05	1.34301e-05	297.629	8.23521e-06	2.46784e-06	297.098	5.49102e-05	1.64045e-05	306.783	3.1529e-06	9.80717e-07
283.786	5.33697e-05	1.52904e-05	297.476	5.12e-05	1.53578e-05	300.287	6.66398e-06	1.9728e-06	289.727	6.02398e-05	1.76028e-05	303.165	1.88418e-05	5.6672e-06	293.855	5.52713e-05	1.63095e-05	313.094	2.34177e-06	7.23411e-07	281.987	5.10016e-05	1.45725e-05	297.937	9.06994e-06	2.70232e-06	297.386	6.0057e-05	1.7846e-05	307.057	3.44473e-06	1.06667e-06
284.086	5.83535e-05	1.66205e-05	297.765	5.60393e-05	1.67201e-05	300.575	7.27991e-06	2.14336e-06	290.037	6.6212e-05	1.92328e-05	303.468	2.07202e-05	6.19701e-06	294.158	6.06741e-05	1.78017e-05	313.392	2.57784e-06	7.92208e-07	282.28	5.56209e-05	1.58035e-05	298.246	9.98341e-06	2.95723e-06	297.675	6.5653e-05	1.94038e-05	307.33	3.762e-06	1.15965e-06
284.386	6.37677e-05	1.80558e-05	298.054	6.13051e-05	1.81934e-05	300.862	7.94872e-06	2.3274e-06	290.348	7.2733e-05	2.10003e-05	303.771	2.2773e-05	6.77227e-06	294.462	6.65677e-05	1.94189e-05	313.69	2.83622e-06	8.67073e-07	282.572	6.06277e-05	1.71293e-05	298.555	1.09824e-05	3.23416e-06	297.963	7.17343e-05	2.10864e-05	307.604	4.10677e-06	1.26018e-06
284.685	6.9646e-05	1.96036e-05	298.344	6.70318e-05	1.9786e-05	301.149	8.67457e-06	2.52588e-06	290.658	7.98488e-05	2.29158e-05	304.074	2.50149e-05	7.39648e-06	294.765	7.29928e-05	2.11703e-05	313.988	3.11886e-06	9.48495e-07	282.864	6.60517e-05	1.85563e-05	298.864	1.20743e-05	3.53481e-06	298.252	7.83393e-05	2.29025e-05	307.877	4.48127e-06	1.36884e-06
284.985	7.60245e-05	2.12716e-05	298.633	7.32564e-05	2.15065e-05	301.437	9.46189e-06	2.7398e-06	290.969	8.76088e-05	2.49901e-05	304.377	2.74621e-05	8.07337e-06	295.069	7.99933e-05	2.3066e-05	314.286	3.42788e-06	1.037e-06	283.156	7.19243e-05	2.00914e-05	299.173	1.32669e-05	3.861e-06	298.54	8.55093e-05	2.48617e-05	308.151	4.88789e-06	1.48622e-06
285.285	8.29417e-05	2.30681e-05	298.923	8.00187e-05	2.33641e-05	301.724	1.03154e-05	2.97023e-06	291.279	9.60658e-05	2.72348e-05	304.68	3.01316e-05	8.80688e-06	295.372	8.7616e-05	2.51164e-05	314.584	3.76555e-06	1.13314e-06	283.449	7.82793e-05	2.17417e-05	299.482	1.45688e-05	4.21464e-06	298.828	9.32886e-05	2.6974e-05	308.424	5.32917e-06	1.61296e-06
285.585	9.04386e-05	2.50015e-05	299.212	8.73611e-05	2.53685e-05	302.011	1.12403e-05	3.21829e-06	291.59	0.000105277	2.96624e-05	304.984	3.30418e-05	9.60126e-06	295.676	9.59115e-05	2.73328e-05	314.882	4.13432e-06	1.23753e-06	283.741	8.51526e-05	2.35149e-05	299.791	1.59891e-05	4.59779e-06	299.117	0.000101724	2.92501e-05	308.698	5.80789e-06	1.74974e-06
285.885	9.85591e-05	2.70812e-05	299.502	9.53292e-05	2.753e-05	302.299	1.22418e-05	3.48517e-06	291.9	0.000115302	3.22857e-05	305.287	3.62127e-05	1.0461e-05	295.979	0.000104934	2.97271e-05	315.18	4.53684e-06	1.3508e-06	284.033	9.25824e-05	2.54191e-05	300.1	1.75374e-05	5.01263e-06	299.405	0.000110867	3.17012e-05	308.972	6.32697e-06	1.89731e-06
286.185	0.00010735	2.93166e-05	299.791	0.000103972	2.98597e-05	302.586	1.33258e-05	3.77214e-06	292.211	0.000126207	3.51188e-05	305.59	3.96653e-05	1.13908e-05	296.283	0.00011474	3.23118e-05	315.478	4.97598e-06	1.47364e-06	284.326	0.00010061	2.74627e-05	300.409	1.92244e-05	5.46146e-06	299.694	0.00012077	3.43392e-05	309.245	6.88959e-06	2.05642e-06
286.485	0.000116861	3.1718e-05	300.081	0.00011334	3.23691e-05	302.874	1.44983e-05	4.08051e-06	292.521	0.000138062	3.8176e-05	305.893	4.34226e-05	1.23957e-05	296.586	0.000125393	3.51003e-05	315.776	5.45478e-06	1.60678e-06	284.618	0.000109278	2.96546e-05	300.718	2.10614e-05	5.94674e-06	299.982	0.000131492	3.71767e-05	309.519	7.49912e-06	2.22792e-06
286.784	0.000127145	3.42959e-05	300.37	0.000123491	3.50706e-05	303.161	1.57661e-05	4.4117e-06	292.832	0.00015094	4.1473e-05	306.196	4.75089e-05	1.34812e-05	296.89	0.000136958	3.81067e-05	316.074	5.97657e-06	1.75101e-06	284.91	0.000118632	3.20043e-05	301.026	2.30602e-05	6.47108e-06	300.27	0.000143093	4.02271e-05	309.792	8.15921e-06	2.41267e-06
287.084	0.000138258	3.70616e-05	300.659	0.000134482	3.7977e-05	303.448	1.7136e-05	4.76717e-06	293.142	0.000164921	4.50259e-05	306.499	5.19504e-05	1.46528e-05	297.193	0.000149507	4.13458e-05	316.372	6.54489e-06	1.90716e-06	285.203	0.000128723	3.45215e-05	301.335	2.5234e-05	7.03721e-06	300.559	0.00015564	4.35043e-05	310.066	8.87371e-06	2.6116e-06
287.384	0.00015026	4.00268e-05	300.949	0.000146379	4.11022e-05	303.736	1.86155e-05	5.14848e-06	293.453	0.000180091	4.8852e-05	306.802	5.67749e-05	1.59167e-05	297.497	0.000163113	4.48335e-05	316.67	7.16356e-06	2.07613e-06	285.495	0.000139601	3.72168e-05	301.644	2.75964e-05	7.64805e-06	300.847	0.000169201	4.70231e-05	310.34	9.6468e-06	2.82572e-06
287.684	0.000163215	4.32039e-05	301.238	0.000159247	4.44605e-05	304.023	2.02125e-05	5.55725e-06	293.764	0.000196539	5.29693e-05	307.105	6.20124e-05	1.7279e-05	297.8	0.000177859	4.85863e-05	316.968	7.83668e-06	2.25886e-06	285.787	0.000151322	4.01009e-05	301.953	3.01623e-05	8.30667e-06	301.136	0.000183851	5.07991e-05	310.613	1.04829e-05	3.05607e-06
287.984	0.000177191	4.66057e-05	301.528	0.000173159	4.80674e-05	304.31	2.19353e-05	5.99521e-06	294.074	0.000214362	5.73969e-05	307.408	6.76947e-05	1.87466e-05	298.104	0.00019383	5.26218e-05	317.266	8.56865e-06	2.45636e-06	286.079	0.000163945	4.31854e-05	302.262	3.29474e-05	9.01632e-06	301.424	0.00019967	5.48486e-05	310.887	1.13868e-05	3.30377e-06
288.284	0.000192257	5.02458e-05	301.817	0.000188192	5.19387e-05	304.598	2.37929e-05	6.46416e-06	294.385	0.000233662	6.21547e-05	307.712	7.38559e-05	2.03265e-05	298.407	0.000211116	5.69583e-05	317.564	9.3642e-06	2.66971e-06	286.372	0.000177532	4.64822e-05	302.571	3.59685e-05	9.78041e-06	301.712	0.00021674	5.91891e-05	311.16	1.23635e-05	3.57e-06
288.584	0.000208491	5.41384e-05	302.107	0.000204426	5.60916e-05	304.885	2.57947e-05	6.96598e-06	294.695	0.000254549	6.72637e-05	308.015	8.05323e-05	2.20261e-05	298.711	0.000229816	6.16152e-05	317.862	1.02284e-05	2.90006e-06	286.664	0.000192148	5.00038e-05	302.88	3.92436e-05	1.06025e-05	302.001	0.000235151	6.38385e-05	311.434	1.34185e-05	3.85601e-06
288.883	0.000225972	5.82982e-05	302.396	0.00022195	6.05438e-05	305.172	2.79507e-05	7.50265e-06	295.006	0.000277138	7.27459e-05	308.318	8.77625e-05	2.38533e-05	299.014	0.000250033	6.6613e-05	318.16	1.11667e-05	3.14862e-06	286.956	0.000207862	5.37634e-05	303.189	4.27917e-05	1.14865e-05	302.289	0.000254997	6.88159e-05	311.708	1.45575e-05	4.16315e-06
289.183	0.000244786	6.27408e-05	302.685	0.000240853	6.5314e-05	305.46	3.02715e-05	8.07625e-06	295.316	0.000301553	7.86244e-05	308.621	9.55878e-05	2.58164e-05	299.318	0.000271877	7.19729e-05	318.458	1.21848e-05	3.41668e-06	287.249	0.00022475	5.77747e-05	303.498	4.66332e-05	1.24363e-05	302.578	0.000276379	7.41412e-05	311.981	1.57867e-05	4.4928e-06
289.483	0.000265021	6.74821e-05	302.975	0.000261236	7.0422e-05	305.747	3.27684e-05	8.68894e-06	295.627	0.000327923	8.49233e-05	308.924	0.000104052	2.7924e-05	299.621	0.000295464	7.77175e-05	318.756	1.3289e-05	3.70562e-06	287.541	0.000242887	6.2052e-05	303.806	5.07897e-05	1.34561e-05	302.866	0.000299403	7.98353e-05	312.255	1.71126e-05	4.84647e-06
289.783	0.000286772	7.2539e-05	303.264	0.0002832	7.58883e-05	306.035	3.54532e-05	9.34298e-06	295.937	0.000356388	9.16677e-05	309.227	0.000113201	3.01853e-05	299.925	0.000320918	8.38703e-05	319.054	1.4486e-05	4.0169e-06	287.833	0.000262357	6.66103e-05	304.115	5.52842e-05	1.45503e-05	303.154	0.000324183	8.59202e-05	312.528	1.85423e-05	5.22572e-06
290.083	0.00031014	7.79289e-05	303.554	0.000306857	8.17345e-05	306.322	3.83386e-05	1.00408e-05	296.248	0.000387094	9.88839e-05	309.53	0.000123086	3.26098e-05	300.228	0.000348371	9.04558e-05	319.352	1.57829e-05	4.35205e-06	288.125	0.000283246	7.14653e-05	304.424	6.01411e-05	1.57235e-05	303.443	0.000350836	9.24187e-05	312.802	2.00832e-05	5.63223e-06
290.383	0.000335229	8.367e-05	303.843	0.000332322	8.79834e-05	306.609	4.14377e-05	1.07847e-05	296.558	0.000420195	0.000106599	309.833	0.000133758	3.52075e-05	300.532	0.000377962	9.74998e-05	319.65	1.71873e-05	4.71273e-06	288.418	0.000305645	7.66331e-05	304.733	6.53863e-05	1.69804e-05	303.731	0.00037949	9.93547e-05	313.075	2.17433e-05	6.06774e-06
290.683	0.000362151	8.9781e-05	304.133	0.000359719	9.46587e-05	306.897	4.47647e-05	1.15774e-05	296.869	0.000455856	0.000114843	310.136	0.000145273	3.79889e-05	300.835	0.000409838	0.000105029	319.948	1.87072e-05	5.10066e-06	288.71	0.000329652	8.21307e-05	305.042	7.10471e-05	1.83262e-05	304.02	0.000410277	0.000106753	313.349	2.3531e-05	6.53411e-06
290.983	0.000391021	9.62816e-05	304.422	0.000389179	0.000101785	307.184	4.83342e-05	1.24216e-05	297.179	0.00049425	0.000123643	310.44	0.000157689	4.09649e-05	301.139	0.000444155	0.000113072	320.246	2.03514e-05	5.51769e-06	289.002	0.000355367	8.79757e-05	305.351	7.71527e-05	1.9766e-05	304.308	0.000443339	0.00011464	313.623	2.54552e-05	7.0333e-06
291.282	0.000421964	0.000103192	304.711	0.000420839	0.000109388	307.471	5.21619e-05	1.33199e-05	297.49	0.000535559	0.000133032	310.743	0.000171071	4.41469e-05	301.442	0.000481078	0.000121657	320.544	2.21292e-05	5.96576e-06	289.295	0.000382897	9.41863e-05	305.66	8.37338e-05	2.13053e-05	304.596	0.000478824	0.000123043	313.896	2.75256e-05	7.56737e-06
291.582	0.000455109	0.000110533	305.001	0.000454846	0.000117496	307.759	5.62641e-05	1.42754e-05	297.8	0.000579976	0.000143041	311.046	0.000185483	4.7547e-05	301.746	0.00052078	0.000130816	320.842	2.40503e-05	6.44693e-06	289.587	0.000412355	0.000100782	305.969	9.08229e-05	2.29498e-05	304.885	0.00051689	0.00013199	314.17	2.97522e-05	8.13849e-06
291.882	0.00049059	0.000118326	305.29	0.000491353	0.000126135	308.046	6.06582e-05	1.52909e-05	298.111	0.000627704	0.000153703	311.349	0.000200996	5.11776e-05	302.049	0.000563445	0.000140579	321.14	2.61253e-05	6.96337e-06	289.879	0.000443859	0.000107781	306.278	9.84543e-05	2.47055e-05	305.173	0.000557701	0.00014151	314.443	3.21458e-05	8.74894e-06
292.182	0.00052855	0.000126595	305.58	0.000530523	0.000135336	308.333	6.53623e-05	1.63697e-05	298.421	0.000678957	0.000165052	311.652	0.000217682	5.50514e-05	302.353	0.000609267	0.000150979	321.438	2.83655e-05	7.51739e-06	290.172	0.000477533	0.000115206	306.587	0.000106664	2.65785e-05	305.462	0.000601432	0.000151634	314.717	3.47179e-05	9.40115e-06
292.482	0.000569139	0.00013536	305.869	0.000572528	0.000145129	308.621	7.03955e-05	1.75149e-05	298.732	0.000733957	0.000177124	311.955	0.000235621	5.91821e-05	302.656	0.00065845	0.000162052	321.736	3.07826e-05	8.11142e-06	290.464	0.000513507	0.000123076	306.895	0.000115491	2.85751e-05	305.75	0.000648266	0.000162394	314.991	3.74805e-05	1.00976e-05
292.782	0.000612513	0.000144648	306.159	0.000617548	0.000155545	308.908	7.57778e-05	1.87299e-05	299.042	0.000792942	0.000189955	312.258	0.000254894	6.35835e-05	302.96	0.000711207	0.000173831	322.034	3.33894e-05	8.74802e-06	290.756	0.000551919	0.000131414	307.204	0.000124975	3.07021e-05	306.038	0.000698396	0.000173822	315.264	4.04465e-05	1.08411e-05
293.082	0.000658836	0.000154481	306.448	0.000665772	0.000166618	309.196	8.15302e-05	2.0018e-05	299.353	0.000856159	0.000203582	312.561	0.000275588	6.82702e-05	303.263	0.000767765	0.000186354	322.332	3.61995e-05	9.42989e-06	291.048	0.000592911	0.000140242	307.513	0.000135158	3.29661e-05	306.327	0.000752024	0.000185952	315.538	4.36295e-05	1.16342e-05
293.381	0.000708278	0.000164885	306.737	0.000717401	0.000178381	309.483	8.76749e-05	2.13829e-05	299.663	0.000923866	0.000218044	312.864	0.000297793	7.3257e-05	303.567	0.000828361	0.000199658	322.63	3.9227e-05	1.01599e-05	291.341	0.000636634	0.000149584	307.822	0.000146085	3.53744e-05	306.615	0.000809363	0.00019882	315.811	4.70439e-05	1.24801e-05
293.681	0.000761019	0.000175886	307.027	0.000772645	0.00019087	309.77	9.42349e-05	2.28281e-05	299.974	0.000996336	0.000233381	313.168	0.000321605	7.85596e-05	303.87	0.000893243	0.000213783	322.928	4.24874e-05	1.09411e-05	291.633	0.000683244	0.000159464	308.131	0.000157802	3.79341e-05	306.904	0.000870637	0.000212462	316.085	5.0705e-05	1.33816e-05
293.981	0.000817245	0.00018751	307.316	0.000831724	0.000204122	310.058	0.000101234	2.43575e-05	300.284	0.00107385	0.000249633	313.471	0.000347125	8.41938e-05	304.174	0.000962674	0.000228769	323.226	4.59967e-05	1.17765e-05	291.925	0.000732907	0.000169906	308.44	0.00017036	4.06528e-05	307.192	0.000936079	0.000226915	316.359	5.46289e-05	1.43422e-05
294.281	0.000877152	0.000199784	307.606	0.00089487	0.000218174	310.345	0.000108699	2.59749e-05	300.595	0.00115671	0.000266841	313.774	0.000374459	9.01763e-05	304.477	0.00103693	0.000244656	323.524	4.97721e-05	1.26697e-05	292.218	0.000785793	0.000180935	308.749	0.000183808	4.35383e-05	307.48	0.00100593	0.000242218	316.632	5.88326e-05	1.53651e-05
294.581	0.000940943	0.000212735	307.895	0.000962326	0.000233065	310.632	0.000116654	2.76844e-05	300.906	0.00124523	0.000285047	314.077	0.000403716	9.6524e-05	304.781	0.00111629	0.000261488	323.822	5.3832e-05	1.3624e-05	292.51	0.000842083	0.000192579	309.058	0.000198202	4.65984e-05	307.769	0.00108046	0.000258412	316.906	6.33342e-05	1.64539e-05
294.881	0.00100883	0.000226391	308.185	0.00103435	0.000248835	310.92	0.000125129	2.94898e-05	301.216	0.00133972	0.000304296	314.38	0.000435014	0.000103254	305.084	0.00120106	0.000279309	324.12	5.81955e-05	1.46432e-05	292.802	0.000901964	0.000204863	309.367	0.000213598	4.98413e-05	308.057	0.00115992	0.000275536	317.179	6.81528e-05	1.76123e-05
295.181	0.00108103	0.000240782	308.474	0.0011112	0.000265526	311.207	0.000134151	3.13955e-05	301.527	0.00144052	0.00032463	314.683	0.000468473	0.000110385	305.388	0.00129155	0.000298163	324.418	6.28833e-05	1.57312e-05	293.094	0.00096563	0.000217816	309.675	0.000230054	5.32753e-05	308.346	0.00124461	0.000293632	317.453	7.33083e-05	1.88441e-05
295.48	0.00115777	0.000255936	308.763	0.00119316	0.000283181	311.494	0.00014375	3.34057e-05	301.837	0.00154799	0.000346093	314.986	0.000504221	0.000117935	305.691	0.00138809	0.000318097	324.716	6.7917e-05	1.68921e-05	293.387	0.00103329	0.000231466	309.984	0.000247633	5.6909e-05	308.634	0.0013348	0.000312745	317.727	7.88221e-05	2.01535e-05
295.78	0.0012393	0.000271882	309.053	0.00128052	0.000301843	311.782	0.000153959	3.55247e-05	302.148	0.00166249	0.000368732	315.289	0.00054239	0.000125923	305.995	0.00149102	0.000339157	325.014	7.33197e-05	1.81303e-05	293.679	0.00110514	0.000245841	310.293	0.000266399	6.07509e-05	308.922	0.00143081	0.000332918	318	8.47165e-05	2.15446e-05
296.08	0.00132585	0.000288651	309.342	0.00137359	0.000321557	312.069	0.000164809	3.7757e-05	302.458	0.0017844	0.000392591	315.592	0.000583118	0.000134368	306.298	0.0016007	0.000361391	325.312	7.91156e-05	1.94502e-05	293.971	0.00118143	0.000260971	310.602	0.000286418	6.48101e-05	309.211	0.00153296	0.000354196	318.274	9.10151e-05	2.30219e-05
296.38	0.00141769	0.000306273	309.632	0.00147268	0.000342368	312.357	0.000176334	4.01071e-05	302.769	0.00191411	0.000417716	315.896	0.000626551	0.00014329	306.602	0.0017175	0.000384848	325.61	8.53307e-05	2.08566e-05	294.264	0.00126236	0.000276887	310.911	0.000307762	6.90953e-05	309.499	0.00164158	0.000376625	318.547	9.77426e-05	2.45899e-05
296.68	0.00151508	0.000324777	309.921	0.00157813	0.000364325	312.644	0.00018857	4.25796e-05	303.079	0.00205203	0.000444153	316.199	0.000672839	0.000152709	306.905	0.00184181	0.000409578	325.908	9.19922e-05	2.23546e-05	294.556	0.00134818	0.000293618	311.22	0.000330501	7.36158e-05	309.788	0.00175701	0.000400253	318.821	0.000104925	2.62534e-05
296.98	0.00161829	0.000344196	310.211	0.00169028	0.000387475	312.931	0.000201553	4.51791e-05	303.39	0.00219858	0.000471948	316.502	0.000722139	0.000162645	307.209	0.00197402	0.00043563	326.206	9.91289e-05	2.39493e-05	294.848	0.00143914	0.000311197	311.529	0.000354712	7.83807e-05	310.076	0.00187962	0.000425127	319.094	0.000112591	2.80175e-05
297.28	0.00172761	0.000364559	310.5	0.00180948	0.000411867	313.219	0.000215321	4.79103e-05	303.7	0.00235419	0.000501148	316.805	0.000774613	0.000173119	307.512	0.00211456	0.000463058	326.504	0.000106771	2.56465e-05	295.141	0.0015355	0.000329655	311.838	0.000380474	8.33994e-05	310.364	0.00200977	0.000451295	319.368	0.000120767	2.98872e-05
297.579	0.00184332	0.000385899	310.789	0.00193612	0.000437551	313.506	0.000229913	5.07781e-05	304.011	0.00251933	0.000531798	317.108	0.000830432	0.000184151	307.816	0.00226385	0.000491911	326.802	0.000114952	2.74518e-05	295.433	0.00163752	0.000349025	312.147	0.000407867	8.86811e-05	310.653	0.00214786	0.000478808	319.642	0.000129486	3.18681e-05
297.879	0.00196574	0.000408245	311.079	0.00207059	0.000464578	313.793	0.000245369	5.37871e-05	304.321	0.00269444	0.000563945	317.411	0.00088977	0.000195763	308.119	0.00242235	0.000522243	327.099	0.000123704	2.93713e-05	295.725	0.00174547	0.000369339	312.455	0.000436976	9.42354e-05	310.941	0.00229428	0.000507715	319.915	0.000138779	3.39656e-05
298.179	0.00209516	0.000431629	311.368	0.00221328	0.000493	314.081	0.000261732	5.69423e-05	304.632	0.00288002	0.000597633	317.714	0.00095281	0.000207977	308.422	0.00259052	0.000554105	327.397	0.000133065	3.14116e-05	296.017	0.00185965	0.000390631	312.764	0.000467887	0.000100072	311.23	0.00244946	0.000538067	320.189	0.000148679	3.61857e-05
298.479	0.00223192	0.000456082	311.658	0.00236461	0.000522868	314.368	0.000279046	6.02485e-05	304.942	0.00307655	0.000632907	318.017	0.00101974	0.000220813	308.726	0.00276884	0.000587551	327.695	0.000143071	3.35792e-05	296.31	0.00198035	0.000412934	313.073	0.000500692	0.000106199	311.518	0.00261382	0.000569915	320.462	0.000159222	3.85344e-05
298.779	0.00237635	0.000481635	311.947	0.00252502	0.000554235	314.655	0.000297354	6.37106e-05	305.253	0.00328454	0.00066981	318.32	0.00109076	0.000234294	309.029	0.00295781	0.000622633	327.993	0.000153763	3.58814e-05	296.602	0.00210787	0.000436283	313.382	0.000535482	0.000112627	311.806	0.00278782	0.00060331	320.736	0.000170444	4.10178e-05
299.079	0.00252877	0.000508318	312.237	0.00269496	0.000587156	314.943	0.000316703	6.73335e-05	305.563	0.00350451	0.000708386	318.624	0.00116606	0.00024844	309.333	0.00315794	0.000659405	328.291	0.000165184	3.83254e-05	296.894	0.00224254	0.000460711	313.691	0.000572353	0.000119366	312.095	0.0029719	0.000638304	321.01	0.000182384	4.36426e-05
299.379	0.00268954	0.000536161	312.526	0.0028749	0.000621683	315.23	0.000337141	7.11219e-05	305.874	0.00373699	0.000748676	318.927	0.00124586	0.000263273	309.636	0.00336975	0.00069792	328.589	0.000177377	4.0919e-05	297.187	0.00238467	0.000486254	314	0.000611404	0.000126423	312.383	0.00316655	0.000674948	321.283	0.000195083	4.64154e-05
299.678	0.00285902	0.000565194	312.815	0.00306531	0.00065787	315.518	0.000358717	7.50808e-05	306.184	0.00398253	0.000790719	319.23	0.00133038	0.000278815	309.94	0.0035938	0.00073823	328.887	0.000190391	4.36705e-05	297.479	0.0025346	0.000512945	314.309	0.000652737	0.000133809	312.672	0.00337227	0.000713296	321.557	0.000208582	4.93431e-05
299.978	0.00303757	0.000595446	313.105	0.00326668	0.000695773	315.805	0.00038148	7.9215e-05	306.495	0.00424168	0.000834556	319.533	0.00141982	0.000295087	310.243	0.00383065	0.000780387	329.185	0.000204274	4.65883e-05	297.771	0.00269268	0.000540821	314.618	0.000696455	0.000141532	312.96	0.00358955	0.000753397	321.83	0.000222927	5.24329e-05
300.278	0.00322557	0.000626945	313.394	0.00347954	0.000735444	316.092	0.000405484	8.35292e-05	306.805	0.004515	0.000880221	319.836	0.00151443	0.00031211	310.547	0.00408086	0.000824442	329.483	0.000219078	4.96815e-05	298.063	0.00285926	0.000569915	314.927	0.000742666	0.0001496	313.248	0.00381891	0.000795305	322.104	0.000238164	5.56923e-05
300.578	0.00342339	0.000659719	313.684	0.00370441	0.000776939	316.38	0.00043078	8.8028e-05	307.116	0.00480309	0.000927749	320.139	0.00161442	0.000329905	310.85	0.00434504	0.000870447	329.781	0.00023486	5.29595e-05	298.356	0.00303471	0.000600263	315.236	0.000791479	0.000158023	313.537	0.0040609	0.000839069	322.378	0.000254341	5.91288e-05
300.878	0.00363143	0.000693795	313.973	0.00394184	0.000820312	316.667	0.000457423	9.2716e-05	307.426	0.00510652	0.000977173	320.442	0.00172006	0.000348491	311.154	0.00462379	0.000918451	330.079	0.000251676	5.64322e-05	298.648	0.00321942	0.0006319	315.544	0.000843005	0.000166809	313.825	0.00431605	0.000884741	322.651	0.000271509	6.27503e-05
301.178	0.00385008	0.000729199	314.263	0.00419237	0.000865615	316.954	0.000485469	9.75978e-05	307.737	0.0054259	0.00102852	320.745	0.00183157	0.00036789	311.457	0.00491773	0.000968503	330.377	0.000269588	6.011e-05	298.94	0.00341375	0.00066486	315.853	0.000897359	0.000175964	314.114	0.00458495	0.00093237	322.925	0.000289721	6.6565e-05
301.478	0.00407976	0.000765956	314.552	0.0044566	0.000912902	317.242	0.000514975	0.000102678	308.048	0.00576183	0.00108182	321.048	0.00194921	0.000388119	311.761	0.00522749	0.00102065	330.675	0.000288661	6.40037e-05	299.233	0.00361812	0.000699178	316.162	0.000954658	0.000185498	314.402	0.00486815	0.000982006	323.198	0.000309031	7.05811e-05
301.777	0.00432088	0.00080409	314.841	0.00473509	0.000962226	317.529	0.000545999	0.00010796	308.358	0.00611492	0.0011371	321.352	0.00207324	0.000409198	312.064	0.00555373	0.00107494	330.973	0.000308962	6.81248e-05	299.525	0.00383292	0.000734888	316.471	0.00101502	0.000195415	314.69	0.00516627	0.0010337	323.472	0.000329498	7.48072e-05
302.077	0.00457384	0.000843622	315.131	0.00502847	0.00101364	317.816	0.0005786	0.000113449	308.669	0.0064858	0.00119437	321.655	0.00220393	0.000431145	312.368	0.00589711	0.00113141	331.271	0.000330561	7.24852e-05	299.817	0.00405858	0.000772024	316.78	0.00107857	0.000205724	314.979	0.0054799	0.00108749	323.746	0.00035118	7.92522e-05
302.377	0.00483909	0.000884574	315.42	0.00533735	0.00106719	318.104	0.000612839	0.000119148	308.979	0.00687509	0.00125365	321.958	0.00234154	0.000453977	312.671	0.00625831	0.00119011	331.569	0.000353536	7.70976e-05	300.11	0.00429552	0.00081062	317.089	0.00114542	0.00021643	315.267	0.00580966	0.00114342	324.019	0.000374141	8.3925e-05
302.677	0.00511705	0.000926965	315.71	0.00566236	0.00112292	318.391	0.000648777	0.000125061	309.29	0.00728341	0.00131496	322.261	0.00248634	0.000477709	312.975	0.006638	0.00125107	331.867	0.000377964	8.19752e-05	300.402	0.00454418	0.000850708	317.398	0.00121571	0.000227538	315.555	0.00615618	0.00120155	324.293	0.000398446	8.88348e-05
302.977	0.00540816	0.000970814	315.999	0.00600414	0.00118089	318.679	0.000686477	0.000131191	309.6	0.0077114	0.0013783	322.564	0.00263861	0.000502358	313.278	0.0070369	0.00131434	332.165	0.000403928	8.71318e-05	300.694	0.004805	0.000892321	317.707	0.00128955	0.000239053	315.844	0.00652012	0.00126191	324.566	0.000424161	9.39913e-05
303.277	0.00571285	0.00101614	316.289	0.00636337	0.00124115	318.966	0.000726002	0.000137542	309.911	0.0081597	0.00144368	322.867	0.00279863	0.000527937	313.582	0.00745571	0.00137995	332.463	0.000431517	9.2582e-05	300.986	0.00507844	0.00093549	318.016	0.00136708	0.00025098	316.132	0.00690211	0.00132454	324.84	0.000451357	9.94039e-05
303.577	0.00603159	0.00106295	316.578	0.0067407	0.00130372	319.253	0.000767416	0.000144117	310.221	0.00862893	0.0015111	323.17	0.00296669	0.00055446	313.885	0.00789515	0.00144792	332.761	0.000460822	9.8341e-05	301.279	0.00536496	0.000980246	318.324	0.00144841	0.000263322	316.421	0.00730283	0.00138948	325.113	0.000480106	0.000105083
303.876	0.00636481	0.00111126	316.867	0.00713684	0.00136866	319.541	0.000810785	0.000150919	310.532	0.00911972	0.00158054	323.473	0.00314309	0.000581936	314.189	0.00835595	0.00151829	333.059	0.000491939	0.000104425	301.571	0.00566504	0.00102662	318.633	0.00153369	0.00027608	316.709	0.00772296	0.00145676	325.387	0.000510485	0.000111038
304.176	0.00671296	0.00116108	317.157	0.00755246	0.00143601	319.828	0.000856174	0.000157949	310.842	0.0096327	0.00165201	323.776	0.0033281	0.000610378	314.492	0.00883884	0.00159108	333.357	0.000524972	0.00011085	301.863	0.00597915	0.00107464	318.942	0.00162304	0.000289258	316.997	0.00816317	0.00152642	325.661	0.000542571	0.000117279
304.476	0.00707652	0.00121241	317.446	0.00798829	0.0015058	320.115	0.00090365	0.000165211	311.153	0.0101685	0.00172547	324.08	0.00352203	0.000639792	314.796	0.00934456	0.00166632	333.655	0.000560026	0.000117635	302.156	0.00630778	0.00112433	319.251	0.00171659	0.000302855	317.286	0.00862417	0.00159848	325.934	0.000576447	0.000123818
304.776	0.00745592	0.00126528	317.736	0.00844503	0.00157807	320.403	0.000953279	0.000172705	311.463	0.0107277	0.00180092	324.383	0.00372517	0.000670187	315.099	0.00987386	0.00174402	333.953	0.000597215	0.000124798	302.448	0.00665144	0.00117572	319.56	0.00181447	0.000316872	317.574	0.00910665	0.00167297	326.208	0.000612195	0.000130664
305.076	0.00785164	0.00131967	318.025	0.00892342	0.00165285	320.69	0.00100513	0.000180433	311.774	0.011311	0.00187832	324.686	0.00393782	0.000701568	315.403	0.0104275	0.00182418	334.251	0.000636657	0.000132359	302.74	0.00701062	0.00122884	319.869	0.00191681	0.000331308	317.863	0.00961132	0.00174992	326.481	0.000649904	0.000137829
305.376	0.00826412	0.00137559	318.315	0.00942418	0.00173016	320.978	0.00105927	0.000188397	312.084	0.0119189	0.00195764	324.989	0.00416029	0.000733937	315.706	0.0110062	0.00190684	334.549	0.000678476	0.000140337	303.033	0.00738585	0.00128371	320.178	0.00202374	0.00034616	318.151	0.0101389	0.00182934	326.755	0.000689662	0.000145323
305.676	0.00869382	0.00143303	318.604	0.00994806	0.00181003	321.265	0.00111576	0.000196596	312.395	0.012552	0.00203883	325.292	0.00439286	0.000767296	316.01	0.0116108	0.00199197	334.847	0.000722803	0.000148754	303.325	0.00777762	0.00134035	320.487	0.00213538	0.000361425	318.439	0.0106901	0.00191124	327.029	0.000731565	0.000153157
305.975	0.00914121	0.001492	318.894	0.0104958	0.00189248	321.552	0.00117468	0.000205031	312.705	0.0132109	0.00212185	325.595	0.00463585	0.000801645	316.313	0.0122419	0.00207959	335.145	0.000769777	0.000157633	303.617	0.00818648	0.00139878	320.796	0.00225187	0.000377099	318.728	0.0112656	0.00199564	327.302	0.000775707	0.000161344
306.275	0.00960674	0.00155249	319.183	0.0110682	0.00197753	321.84	0.00123609	0.000213701	313.016	0.0138961	0.00220664	325.898	0.00488955	0.000836981	316.617	0.0129004	0.00216969	335.443	0.000819541	0.000166998	303.909	0.00861294	0.00145902	321.105	0.00237332	0.000393176	319.016	0.0118662	0.00208255	327.576	0.000822188	0.000169893
306.575	0.0100909	0.00161448	319.472	0.0116659	0.00206518	322.127	0.00130006	0.000222606	313.326	0.0146081	0.00229315	326.201	0.00515426	0.000873298	316.92	0.013587	0.00226225	335.741	0.000872247	0.000176873	304.202	0.00905755	0.0015211	321.413	0.00249985	0.00040965	319.305	0.0124926	0.00217196	327.849	0.00087111	0.000178817
306.875	0.010594	0.00167796	319.762	0.0122897	0.00215545	322.414	0.00136666	0.000231745	313.637	0.0153476	0.00238129	326.504	0.00543027	0.000910591	317.224	0.0143024	0.00235726	336.039	0.000928057	0.000187285	304.494	0.00952085	0.00158502	321.722	0.0026316	0.000426511	319.593	0.0131455	0.00226388	328.123	0.00092258	0.000188128
307.175	0.0111166	0.00174292	320.051	0.0129405	0.00224833	322.702	0.00143594	0.000241115	313.947	0.0161149	0.00247099	326.808	0.00571788	0.000948849	317.527	0.0150474	0.00245469	336.337	0.000987136	0.00019826	304.786	0.0100034	0.00165079	322.031	0.00276867	0.000443751	319.881	0.0138257	0.00235828	328.397	0.000976706	0.000197835
307.475	0.0116592	0.00180934	320.341	0.0136188	0.00234382	322.989	0.00150799	0.000250715	314.258	0.0169105	0.00256218	327.111	0.00601737	0.00098806	317.831	0.0158227	0.00255452	336.635	0.00104966	0.000209828	305.079	0.0105057	0.00171844	322.34	0.00291118	0.00046136	320.17	0.0145337	0.00245517	328.67	0.0010336	0.000207953
307.775	0.0122221	0.0018772	320.63	0.0143256	0.00244192	323.276	0.00158286	0.000260541	314.568	0.0177348	0.00265475	327.414	0.00632903	0.00102821	318.134	0.016629	0.00265671	336.933	0.00111582	0.000222019	305.371	0.0110283	0.00178797	322.649	0.00305924	0.000479323	320.458	0.0152704	0.00255452	328.944	0.00109338	0.000218491
308.074	0.0128057	0.00194646	320.92	0.0150615	0.00254261	323.564	0.00166062	0.000270589	314.879	0.0185883	0.0027486	327.717	0.00665315	0.00106928	318.438	0.017467	0.00276121	337.231	0.00118581	0.000234864	305.663	0.0115718	0.00185938	322.958	0.00321296	0.000497629	320.747	0.0160365	0.00265629	329.217	0.00115615	0.000229461
308.374	0.0134106	0.00201711	321.209	0.0158273	0.00264587	323.851	0.00174133	0.000280857	315.19	0.0194713	0.00284363	328.02	0.00698998	0.00111125	318.741	0.0183375	0.00286797	337.529	0.00125983	0.000248397	305.955	0.0121367	0.00193268	323.267	0.00337243	0.000516261	321.035	0.0168326	0.00276048	329.491	0.00122206	0.000240876
308.674	0.014037	0.00208912	321.498	0.0166237	0.00275167	324.139	0.00182505	0.000291339	315.5	0.0203842	0.00293971	328.323	0.0073398	0.0011541	319.045	0.0192409	0.00297695	337.827	0.0013381	0.000262652	306.248	0.0127236	0.00200788	323.576	0.00353775	0.000535204	321.323	0.0176595	0.00286702	329.764	0.00129121	0.000252747
308.974	0.0146855	0.00216244	321.788	0.0174515	0.00285999	324.426	0.00191184	0.000302029	315.811	0.0213272	0.00303673	328.626	0.00770287	0.00119781	319.348	0.0201782	0.00308807	338.125	0.00142084	0.000277667	306.54	0.013333	0.00208497	323.885	0.00370901	0.000554438	321.612	0.0185177	0.00297588	330.038	0.00136373	0.000265084
309.274	0.0153562	0.00223704	322.077	0.0183113	0.00297077	324.713	0.00200176	0.000312922	316.121	0.0223005	0.00313456	328.929	0.00807944	0.00124234	319.652	0.0211497	0.00320127	338.423	0.0015083	0.000293479	306.832	0.0139655	0.00216395	324.193	0.0038863	0.000573945	321.9	0.019408	0.00308701	330.312	0.00143976	0.0002779
309.574	0.0160498	0.00231288	322.367	0.0192039	0.00308398	325.001	0.00209487	0.000324011	316.432	0.0233044	0.00323304	329.232	0.00846974	0.00128766	319.955	0.0221563	0.00331646	338.721	0.00160071	0.000310129	307.125	0.0146217	0.00224481	324.502	0.00406969	0.000593702	322.189	0.020331	0.00320035	330.585	0.00151943	0.000291206
309.874	0.0167664	0.00238992	322.656	0.02013	0.00319955	325.288	0.00219122	0.000335289	316.742	0.0243391	0.00333203	329.536	0.00887402	0.00133375	320.259	0.0231984	0.00343356	339.019	0.00169835	0.000327658	307.417	0.015302	0.00232755	324.811	0.00425926	0.000613688	322.477	0.0212872	0.00331583	330.859	0.00160288	0.000305013
310.173	0.0175065	0.0024681	322.946	0.0210902	0.00331744	325.575	0.00229087	0.000346748	317.053	0.0254046	0.00343138	329.839	0.00929248	0.00138056	320.562	0.0242765	0.00355249	339.317	0.00180149	0.000346111	307.709	0.016007	0.00241215	325.12	0.00445506	0.000633878	322.765	0.0222774	0.00343338	331.132	0.00169025	0.000319331
310.473	0.0182704	0.00254738	323.235	0.0220851	0.00343757	325.863	0.00239385	0.000358379	317.363	0.026501	0.00353091	330.142	0.00972535	0.00142806	320.866	0.0253913	0.00367312	339.615	0.00191041	0.000365535	308.002	0.0167374	0.0024986	325.429	0.00465715	0.000654246	323.054	0.0233021	0.00355293	331.406	0.00178167	0.00033417
310.773	0.0190583	0.00262771	323.524	0.0231154	0.00355986	326.15	0.00250023	0.000370173	317.674	0.0276284	0.00363047	330.445	0.0101728	0.0014762	321.169	0.0265432	0.00379537	339.913	0.00202543	0.000385977	308.294	0.0174935	0.00258688	325.738	0.00486558	0.000674765	323.342	0.0243618	0.00367437	331.68	0.0018773	0.000349543
311.073	0.0198706	0.00270902	323.814	0.0241818	0.00368424	326.437	0.00261004	0.00038212	317.984	0.0287866	0.00372986	330.748	0.010635	0.00152494	321.473	0.0277326	0.00391912	340.211	0.00214686	0.000407489	308.586	0.018276	0.00267698	326.047	0.00508039	0.000695406	323.631	0.025457	0.00379762	331.953	0.00197729	0.000365457
311.373	0.0207076	0.00279127	324.103	0.0252847	0.00381061	326.725	0.00272332	0.000394209	318.295	0.0299755	0.0038289	331.051	0.0111122	0.00157423	321.776	0.02896	0.00404423	340.509	0.00227503	0.000430123	308.878	0.0190853	0.00276886	326.356	0.0053016	0.000716138	323.919	0.0265882	0.00392258	332.227	0.00208178	0.000381924
311.673	0.0215695	0.00287438	324.393	0.0264247	0.00393886	327.012	0.00284011	0.000406428	318.605	0.0311951	0.0039274	331.354	0.0116045	0.00162403	322.08	0.0302258	0.00417058	340.807	0.0024103	0.000453934	309.171	0.019922	0.00286251	326.665	0.00552923	0.00073693	324.207	0.027756	0.00404913	332.5	0.00219093	0.000398951
311.973	0.0224566	0.00295829	324.682	0.0276024	0.0040689	327.3	0.00296045	0.000418766	318.916	0.032445	0.00402515	331.657	0.012112	0.00167428	322.383	0.0315302	0.00429803	341.105	0.00255303	0.000478981	309.463	0.0207866	0.00295789	326.974	0.0057633	0.000757749	324.496	0.0289607	0.00417715	332.774	0.00230489	0.000416549
312.272	0.023369	0.00304294	324.972	0.0288181	0.00420061	327.587	0.00308436	0.00043121	319.226	0.0337249	0.00412196	331.961	0.0126348	0.00172492	322.687	0.0328736	0.00442643	341.403	0.00270362	0.000505325	309.755	0.0216795	0.00305496	327.282	0.00600379	0.000778559	324.784	0.0302027	0.00430652	333.048	0.00242383	0.000434725
312.572	0.0243071	0.00312825	325.261	0.0300725	0.00433386	327.874	0.00321188	0.000443745	319.537	0.0350346	0.0042176	332.264	0.0131731	0.00177591	322.99	0.0342563	0.00455563	341.701	0.00286245	0.000533027	310.048	0.0226013	0.0031537	327.591	0.0062507	0.000799327	325.073	0.0314823	0.00443711	333.321	0.0025479	0.000453486
312.872	0.0252709	0.00321415	325.55	0.0313658	0.00446851	328.162	0.00334302	0.000456359	319.847	0.0363735	0.00431186	332.567	0.0137269	0.00182718	323.294	0.0356783	0.00468547	341.999	0.00302997	0.000562154	310.34	0.0235525	0.00325407	327.9	0.006504	0.000820013	325.361	0.0328	0.00456876	333.595	0.00267726	0.000472841
313.172	0.0262606	0.00330058	325.84	0.0326985	0.00460444	328.449	0.00347781	0.000469036	320.158	0.0377412	0.00440452	332.87	0.0142964	0.00187867	323.597	0.0371399	0.00481578	342.297	0.00320661	0.000592775	310.632	0.0245334	0.00335602	328.209	0.00676365	0.000840581	325.649	0.0341558	0.00470134	333.868	0.00281209	0.000492796
313.472	0.0272763	0.00338744	326.129	0.0340708	0.00474149	328.736	0.00361625	0.00048176	320.468	0.0391371	0.00449535	333.173	0.0148815	0.00193032	323.901	0.0386411	0.00494639	342.595	0.00339285	0.000624962	310.924	0.0255446	0.0034595	328.518	0.0070296	0.00086099	325.938	0.0355501	0.00483468	334.142	0.00295253	0.000513356
313.772	0.0283182	0.00347467	326.419	0.0354831	0.0048795	329.024	0.00375835	0.000494516	320.779	0.0405606	0.00458412	333.476	0.0154823	0.00198207	324.204	0.040182	0.00507711	342.893	0.00358916	0.000658788	311.217	0.0265865	0.00356447	328.827	0.0073018	0.000881202	326.226	0.0369831	0.00496862	334.416	0.00309878	0.000534527
314.072	0.0293864	0.00356218	326.708	0.0369355	0.0050183	329.311	0.00390413	0.000507287	321.089	0.0420109	0.0046706	333.779	0.0160988	0.00203386	324.508	0.0417625	0.00520776	343.191	0.00379607	0.000694332	311.509	0.0276595	0.00367087	329.136	0.00758017	0.000901173	326.515	0.0384547	0.00510299	334.689	0.00325098	0.000556314
314.371	0.0304808	0.00364989	326.998	0.0384284	0.00515773	329.598	0.00405358	0.000520055	321.4	0.0434873	0.00475454	334.082	0.0167309	0.00208561	324.811	0.0433826	0.00533815	343.489	0.0040141	0.000731673	311.801	0.0287639	0.00377865	329.445	0.00786462	0.000920864	326.803	0.0399653	0.0052376	334.963	0.00340931	0.00057872
314.671	0.0316016	0.00373773	327.287	0.0399616	0.00529761	329.886	0.00420669	0.000532803	321.71	0.0449889	0.00483572	334.385	0.0173788	0.00213726	325.115	0.0450422	0.00546807	343.787	0.00424382	0.000770896	312.094	0.0299003	0.00388776	329.754	0.00815505	0.00094023	327.091	0.0415146	0.00537227	335.236	0.00357394	0.000601748
314.971	0.0327488	0.00382559	327.576	0.0415355	0.00543774	330.173	0.00436345	0.000545512	322.021	0.0465147	0.00491388	334.689	0.0180422	0.00218874	325.418	0.0467409	0.00559732	344.085	0.00448581	0.000812087	312.386	0.031069	0.00399812	330.062	0.00845135	0.00095923	327.38	0.0431028	0.00550681	335.51	0.00374505	0.0006254
315.271	0.0339222	0.00391341	327.866	0.0431499	0.00557793	330.461	0.00452384	0.000558163	322.331	0.0480639	0.00498878	334.992	0.0187212	0.00224	325.722	0.0484787	0.0057257	344.383	0.0047407	0.000855337	312.678	0.0322702	0.00410968	330.371	0.00875339	0.000977819	327.668	0.0447296	0.00564102	335.783	0.00392279	0.000649677
315.571	0.035122	0.00400109	328.155	0.0448049	0.00571797	330.748	0.00468785	0.000570737	322.642	0.0496352	0.00506019	335.295	0.0194156	0.00229096	326.025	0.050255	0.00585299	344.681	0.00500911	0.000900738	312.971	0.0335044	0.00422236	330.68	0.00906104	0.000995953	327.957	0.046395	0.00577468	336.057	0.00410735	0.000674579
315.871	0.036348	0.00408854	328.445	0.0465003	0.00585766	331.035	0.00485545	0.000583214	322.953	0.0512275	0.00512787	335.598	0.0201253	0.00234155	326.329	0.0520696	0.00597897	344.979	0.00529172	0.000948388	313.263	0.0347718	0.0043361	330.989	0.00937413	0.00101359	328.245	0.0480988	0.0059076	336.331	0.00429889	0.000700105
316.171	0.0376001	0.00417569	328.734	0.0482359	0.00599678	331.323	0.00502659	0.000595573	323.263	0.0528396	0.00519157	335.901	0.0208503	0.00239171	326.632	0.053922	0.00610343	345.277	0.00558923	0.000998386	313.555	0.0360727	0.00445083	331.298	0.0096925	0.00103068	328.533	0.0498406	0.00603955	336.604	0.00449759	0.000726252
316.47	0.0388782	0.00426244	329.024	0.0500116	0.0061351	331.61	0.00520125	0.000607795	323.574	0.0544701	0.00525106	336.204	0.0215903	0.00244139	326.936	0.0558116	0.00622613	345.575	0.00590237	0.00105084	313.847	0.0374075	0.00456646	331.607	0.010016	0.00104719	328.822	0.0516201	0.0061703	336.878	0.0047036	0.000753018
316.77	0.0401822	0.00434871	329.313	0.051827	0.00627241	331.897	0.00537938	0.000619859	323.884	0.0561178	0.00530611	336.507	0.0223452	0.00249051	327.239	0.0577379	0.00634686	345.873	0.0062319	0.00110584	314.14	0.0387763	0.00468292	331.916	0.0103443	0.00106307	329.11	0.0534369	0.00629964	337.151	0.00491711	0.000780398
317.07	0.0415119	0.00443442	329.602	0.0536818	0.00640846	332.185	0.00556092	0.000631742	324.195	0.0577811	0.00535648	336.81	0.0231148	0.00253901	327.543	0.0597001	0.00646539	346.171	0.00657862	0.00116352	314.432	0.0401793	0.00480014	332.225	0.0106774	0.00107827	329.399	0.0552905	0.00642733	337.425	0.00513828	0.000808387
317.37	0.0428671	0.00451947	329.892	0.0555756	0.00654301	332.472	0.00574582	0.000643424	324.505	0.0594585	0.00540196	337.113	0.0238989	0.00258685	327.846	0.0616976	0.00658149	346.469	0.00694335	0.00122398	314.724	0.0416169	0.00491801	332.534	0.011015	0.00109276	329.687	0.0571804	0.00655314	337.699	0.00536727	0.000836976
317.67	0.0442476	0.00460378	330.181	0.0575078	0.00667583	332.759	0.00593401	0.000654884	324.816	0.0611485	0.00544231	337.417	0.0246973	0.00263395	328.15	0.0637295	0.00669493	346.767	0.00732697	0.00128733	315.017	0.043089	0.00503647	332.843	0.0113568	0.00110649	329.975	0.059106	0.00667682	337.972	0.00560424	0.000866159
317.97	0.0456531	0.00468727	330.471	0.0594778	0.00680666	333.047	0.00612542	0.000666098	325.126	0.0628493	0.00547734	337.72	0.0255097	0.00268029	328.453	0.0657949	0.00680549	347.065	0.00773036	0.0013537	315.309	0.0445959	0.00515543	333.151	0.0117025	0.00111943	330.264	0.0610666	0.00679814	338.246	0.00584936	0.000895925
318.27	0.0470834	0.00476987	330.76	0.0614851	0.00693527	333.334	0.00631998	0.000677047	325.437	0.0645593	0.00550683	338.023	0.026336	0.0027258	328.757	0.067893	0.00691294	347.363	0.00815446	0.00142321	315.601	0.0461377	0.00527478	333.46	0.0120521	0.00113153	330.552	0.0630614	0.00691686	338.519	0.00610277	0.000926263
318.569	0.0485382	0.00485148	331.05	0.0635289	0.00706138	333.622	0.0065176	0.000687708	325.747	0.0662767	0.00553059	338.326	0.0271757	0.00277044	329.06	0.0700226	0.00701704	347.661	0.00860025	0.00149598	315.893	0.0477145	0.00539446	333.769	0.012405	0.00114275	330.841	0.0650896	0.00703273	338.793	0.00636464	0.000957161
318.869	0.0500171	0.00493203	331.339	0.0656084	0.00718476	333.909	0.0067182	0.000698059	326.058	0.0679996	0.00554844	338.629	0.0280287	0.00281418	329.364	0.0721828	0.00711759	347.959	0.00906874	0.00157215	316.186	0.0493263	0.00551435	334.078	0.0127612	0.00115307	331.129	0.0671503	0.00714551	339.067	0.00663511	0.000988604
319.169	0.0515198	0.00501145	331.628	0.0677227	0.00730513	334.196	0.00692168	0.000708079	326.368	0.0697261	0.00556019	338.932	0.0288947	0.00285698	329.667	0.0743723	0.00721437	348.257	0.00956097	0.00165184	316.478	0.0509732	0.00563438	334.387	0.0131203	0.00116244	331.417	0.0692427	0.00725496	339.34	0.00691433	0.00102058
319.469	0.053046	0.00508966	331.918	0.0698709	0.00742226	334.484	0.00712793	0.000717746	326.679	0.0714544	0.00556568	339.235	0.0297734	0.00289882	329.971	0.07659	0.00730715	348.555	0.010078	0.00173519	316.77	0.0526552	0.00575444	334.696	0.013482	0.00117083	331.706	0.0713655	0.00736083	339.614	0.00720244	0.00105306
319.769	0.0545952	0.0051666	332.207	0.072052	0.00753588	334.771	0.00733686	0.000727039	326.989	0.0731824	0.00556476	339.538	0.0306644	0.00293967	330.274	0.0788346	0.00739572	348.853	0.0106211	0.00182233	317.063	0.0543722	0.00587445	335.005	0.0138459	0.00117822	331.994	0.0735178	0.00746288	339.887	0.00749957	0.00108604
320.069	0.0561671	0.00524219	332.497	0.074265	0.00764573	335.058	0.00754834	0.000735938	327.3	0.074908	0.00555728	339.841	0.0315676	0.00297953	330.578	0.0811047	0.0074799	349.151	0.0111913	0.00191341	317.355	0.0561244	0.0059943	335.314	0.0142118	0.00118457	332.283	0.0756983	0.00756087	340.161	0.00780585	0.00111949
320.369	0.0577613	0.00531637	332.786	0.0765085	0.00775156	335.346	0.00776226	0.000744421	327.61	0.0766293	0.00554312	340.145	0.0324825	0.00301838	330.881	0.083399	0.00755947	349.449	0.0117898	0.00200856	317.647	0.0579114	0.0061139	335.623	0.0145794	0.00118986	332.571	0.0779059	0.00765457	340.435	0.00812141	0.0011534
320.669	0.0593773	0.00538908	333.076	0.0787814	0.00785312	335.633	0.0079785	0.000752469	327.921	0.078344	0.00552217	340.448	0.0334089	0.00305623	331.185	0.085716	0.00763424	349.747	0.0124179	0.00210793	317.94	0.0597333	0.00623316	335.931	0.0149482	0.00119408	332.859	0.0801392	0.00774375	340.708	0.00844636	0.00118773
320.968	0.0610146	0.00546027	333.365	0.0810824	0.00795017	335.92	0.00819691	0.000760062	328.231	0.0800502	0.00549433	340.751	0.0343464	0.00309308	331.488	0.0880541	0.00770405	350.045	0.013077	0.00221166	318.232	0.06159	0.00635199	336.24	0.015318	0.00119719	333.148	0.0823968	0.00782817	340.982	0.00878082	0.00122246
321.268	0.0626727	0.00552987	333.654	0.0834102	0.00804245	336.208	0.00841737	0.000767181	328.542	0.0817454	0.00545952	341.054	0.0352948	0.00312895	331.792	0.0904119	0.00776871	350.343	0.0137683	0.00231989	318.524	0.0634812	0.00647028	336.549	0.0156884	0.00119918	333.436	0.0846773	0.00790762	341.255	0.00912488	0.00125757
321.568	0.0643513	0.00559784	333.944	0.0857632	0.00812974	336.495	0.00863974	0.000773807	328.852	0.0834278	0.00541767	341.357	0.0362538	0.00316387	332.095	0.0927877	0.00782806	350.641	0.0144932	0.00243279	318.816	0.0654068	0.00658795	336.858	0.0160591	0.00120005	333.725	0.0869793	0.00798188	341.529	0.00947863	0.00129302
321.868	0.0660497	0.00566414	334.233	0.0881399	0.00821179	336.783	0.00886386	0.000779924	329.163	0.0850949	0.00536873	341.66	0.0372231	0.00319787	332.399	0.0951799	0.00788195	350.939	0.0152533	0.00255048	319.109	0.0673667	0.0067049	337.167	0.0164297	0.00119978	334.013	0.0893011	0.00805075	341.802	0.00984218	0.00132879
322.168	0.0677676	0.00572872	334.523	0.0905388	0.00828838	337.07	0.00908959	0.000785513	329.473	0.0867446	0.00531268	341.963	0.0382025	0.00323101	332.702	0.0975867	0.00793024	351.237	0.0160498	0.00267313	319.401	0.0693604	0.00682105	337.476	0.0167999	0.00119837	334.301	0.0916412	0.00811403	342.076	0.0102156	0.00136484
322.468	0.0695042	0.00579155	334.812	0.0929583	0.0083593	337.357	0.00931677	0.000790558	329.784	0.0883746	0.0052495	342.266	0.0391917	0.00326333	333.006	0.100006	0.0079728	351.535	0.0168845	0.00280087	319.693	0.0713879	0.0069363	337.785	0.0171693	0.00119582	334.59	0.0939978	0.00817152	342.35	0.0105989	0.00140114
322.768	0.0712591	0.00585259	335.102	0.0953965	0.00842433	337.645	0.00954524	0.000795045	330.095	0.0899829	0.00517921	342.569	0.0401904	0.00329491	333.309	0.102437	0.00800953	351.833	0.0177587	0.00293386	319.986	0.0734487	0.00705057	338.094	0.0175375	0.00119212	334.878	0.0963693	0.00822305	342.623	0.0109922	0.00143765
323.067	0.0730319	0.00591182	335.391	0.0978518	0.00848327	337.932	0.00977483	0.000798958	330.405	0.0915671	0.00510183	342.873	0.0411985	0.00332582	333.613	0.104877	0.00804032	352.131	0.0186742	0.00307225	320.278	0.0755426	0.00716378	338.403	0.0179043	0.0011873	335.167	0.0987539	0.00826845	342.897	0.0113956	0.00147433
323.367	0.0748218	0.00596922	335.68	0.100322	0.00853595	338.219	0.0100054	0.000802284	330.716	0.0931251	0.00501741	343.176	0.0422158	0.00335615	333.916	0.107325	0.00806508	352.429	0.0196326	0.00321618	320.57	0.0776693	0.00727585	338.712	0.0182692	0.00118136	335.455	0.10115	0.00830756	343.17	0.011809	0.00151115
323.667	0.0766284	0.00602477	335.97	0.102806	0.00858217	338.507	0.0102367	0.000805011	331.026	0.0946548	0.00492601	343.479	0.0432421	0.003386	334.22	0.109779	0.00808375	352.727	0.0206356	0.0033658	320.862	0.0798284	0.0073867	339.02	0.0186319	0.00117432	335.743	0.103555	0.00834025	343.444	0.0122326	0.00154807
323.967	0.078451	0.00607846	336.259	0.105302	0.00862177	338.794	0.0104686	0.000807127	331.337	0.0961539	0.00482773	343.782	0.0442774	0.00341549	334.523	0.112236	0.00809627	353.025	0.0216849	0.00352125	321.155	0.0820195	0.00749625	339.329	0.0189921	0.0011662	336.032	0.105968	0.00836637	343.718	0.0126662	0.00158503
324.267	0.0802893	0.00613028	336.549	0.107807	0.00865461	339.081	0.010701	0.000808623	331.647	0.0976204	0.00472269	344.085	0.0453215	0.00344473	334.827	0.114695	0.00810262	353.323	0.0227823	0.00368267	321.447	0.0842423	0.00760445	339.638	0.0193495	0.00115704	336.32	0.108386	0.00838581	343.991	0.01311	0.001622
324.567	0.0821425	0.00618024	336.838	0.110319	0.00868054	339.369	0.0109336	0.000809489	331.958	0.0990522	0.004611	344.388	0.0463745	0.00347387	335.13	0.117154	0.00810277	353.621	0.0239296	0.0038502	321.739	0.0864962	0.00771122	339.947	0.0197038	0.00114685	336.609	0.110809	0.00839847	344.265	0.0135639	0.00165893
324.867	0.0840101	0.00622834	337.128	0.112837	0.00869945	339.656	0.0111663	0.000809717	332.268	0.100447	0.00449282	344.691	0.0474363	0.00350306	335.434	0.119611	0.00809672	353.919	0.0251288	0.00402397	322.032	0.088781	0.00781651	340.256	0.0200546	0.00113569	336.897	0.113232	0.00840428	344.538	0.0140278	0.00169577
325.166	0.0858916	0.00627458	337.417	0.115358	0.00871122	339.944	0.0113989	0.000809301	332.579	0.101804	0.00436834	344.994	0.048507	0.00353246	335.737	0.122065	0.0080845	354.217	0.0263815	0.00420412	322.324	0.091096	0.00792026	340.565	0.0204017	0.0011236	337.185	0.115656	0.00840315	344.812	0.0145018	0.00173247
325.466	0.0877864	0.006319	337.707	0.117881	0.00871577	340.231	0.0116311	0.000808236	332.889	0.10312	0.00423774	345.297	0.0495868	0.00356224	336.041	0.124513	0.00806613	354.515	0.02769	0.00439076	322.616	0.0934409	0.00802243	340.874	0.0207447	0.00111061	337.474	0.118077	0.00839505	345.086	0.0149858	0.00176899
325.766	0.0896939	0.0063616	337.996	0.120403	0.00871303	340.518	0.0118629	0.000806518	333.2	0.104393	0.00410125	345.601	0.0506758	0.00359258	336.344	0.126954	0.0080417	354.813	0.029056	0.00458403	322.909	0.0958152	0.00812296	341.183	0.0210835	0.0010968	337.762	0.120494	0.00837994	345.359	0.0154797	0.00180526
326.066	0.0916138	0.00640242	338.285	0.122922	0.00870294	340.806	0.012094	0.000804144	333.51	0.105623	0.0039591	345.904	0.0517741	0.0036237	336.648	0.129385	0.00801126	355.111	0.0304816	0.00478402	323.201	0.0982184	0.00822184	341.492	0.0214178	0.00108222	338.051	0.122904	0.00835781	345.633	0.0159834	0.00184124
326.366	0.0935453	0.0064415	338.575	0.125435	0.00868547	341.093	0.0123242	0.000801115	333.821	0.106806	0.00381157	346.207	0.0528823	0.0036558	336.951	0.131805	0.00797494	355.409	0.0319688	0.00499086	323.493	0.10065	0.00831903	341.8	0.0217474	0.00106694	338.339	0.125306	0.00832867	345.906	0.0164969	0.00187687
326.666	0.0954881	0.00647887	338.864	0.127942	0.00866061	341.38	0.0125534	0.000797429	334.131	0.107942	0.00365892	346.51	0.0540005	0.0036891	337.255	0.134213	0.00793284	355.707	0.0335197	0.00520464	323.785	0.10311	0.0084145	342.109	0.0220721	0.00105103	338.627	0.127698	0.00829254	346.18	0.01702	0.0019121
326.966	0.0974415	0.00651459	339.154	0.130439	0.00862837	341.668	0.0127813	0.000793089	334.442	0.10903	0.00350147	346.813	0.0551292	0.00372384	337.558	0.136606	0.00788512	356.005	0.0351365	0.00542546	324.078	0.105596	0.00850825	342.418	0.0223916	0.00103458	338.916	0.130077	0.00824947	346.453	0.0175527	0.00194686
327.265	0.0994052	0.0065487	339.443	0.132925	0.00858877	341.955	0.0130077	0.000788099	334.752	0.110067	0.00333953	347.116	0.056269	0.00376028	337.862	0.138983	0.00783193	356.303	0.0368211	0.00565339	324.37	0.10811	0.00860026	342.727	0.022706	0.00101766	339.204	0.132441	0.00819955	346.727	0.0180947	0.00198111
327.565	0.101379	0.00658126	339.733	0.135398	0.00854186	342.243	0.0132326	0.000782464	335.063	0.111052	0.00317346	347.419	0.0574204	0.00379865	338.165	0.141342	0.00777348	356.601	0.0385759	0.00588852	324.662	0.110651	0.00869055	343.036	0.023015	0.00100037	339.493	0.13479	0.00814286	347.001	0.0186459	0.00201477
327.865	0.103361	0.00661235	340.022	0.137854	0.00848773	342.53	0.0134556	0.00077619	335.373	0.111985	0.00300362	347.722	0.0585841	0.00383925	338.469	0.143682	0.00770997	356.899	0.0404028	0.00613091	324.955	0.113217	0.00877912	343.345	0.0233186	0.000982802	339.781	0.13712	0.00807951	347.274	0.0192062	0.00204779
328.165	0.105353	0.00664203	340.311	0.140293	0.00842645	342.817	0.0136767	0.000769285	335.684	0.112864	0.0028304	348.025	0.0597609	0.00388234	338.772	0.146002	0.00764164	357.197	0.0423042	0.00638061	325.247	0.115808	0.00886599	343.654	0.0236167	0.000965069	340.069	0.13943	0.00800965	347.548	0.0197753	0.00208011
328.465	0.107353	0.00667038	340.601	0.142712	0.00835816	343.105	0.0138956	0.000761758	335.994	0.113688	0.00265418	348.329	0.0609516	0.00392822	339.076	0.148299	0.00756874	357.495	0.0442822	0.00663767	325.539	0.118424	0.00895119	343.963	0.0239093	0.000947276	340.358	0.141718	0.00793343	347.821	0.020353	0.00211167
328.765	0.109362	0.00669749	340.89	0.145109	0.008283	343.392	0.0141122	0.000753622	336.305	0.114456	0.0024754	348.632	0.0621571	0.00397718	339.379	0.150572	0.00749155	357.793	0.0463389	0.00690212	325.832	0.121065	0.00903477	344.272	0.0241964	0.000929542	340.646	0.143982	0.00785106	348.095	0.0209391	0.0021424
329.065	0.111378	0.00672345	341.18	0.147483	0.00820113	343.679	0.0143262	0.000744888	336.615	0.115169	0.0022945	348.935	0.0633785	0.00402953	339.683	0.152821	0.00741037	358.091	0.0484767	0.00717397	326.124	0.12373	0.00911676	344.581	0.0244781	0.000911988	340.935	0.146221	0.00776272	348.369	0.0215334	0.00217224
329.364	0.113401	0.00674835	341.469	0.149831	0.00811275	343.967	0.0145376	0.000735571	336.926	0.115825	0.00211191	349.238	0.0646169	0.0040856	339.986	0.155045	0.00732553	358.389	0.0506977	0.00745324	326.416	0.126418	0.00919724	344.889	0.0247545	0.000894744	341.223	0.148432	0.00766867	348.642	0.0221357	0.00220114
329.664	0.115432	0.00677231	341.759	0.152152	0.00801808	344.254	0.0147461	0.000725687	337.237	0.116423	0.00192813	349.541	0.0658736	0.00414569	340.29	0.157241	0.00723738	358.687	0.0530041	0.00773991	326.708	0.12913	0.00927626	345.198	0.0250257	0.000877946	341.511	0.150615	0.00756914	348.916	0.0227455	0.00222902
329.964	0.11747	0.00679542	342.048	0.154443	0.00791734	344.541	0.0149517	0.000715253	337.547	0.116965	0.00174362	349.844	0.0671497	0.00421014	340.593	0.15941	0.00714626	358.985	0.0553982	0.00803397	327.001	0.131864	0.00935391	345.507	0.0252919	0.000861734	341.8	0.152768	0.00746444	349.189	0.0233627	0.00225583
330.264	0.119514	0.00681782	342.337	0.156704	0.00781082	344.829	0.0151541	0.000704287	337.858	0.117449	0.00155889	350.147	0.0684468	0.00427929	340.897	0.16155	0.00705259	359.283	0.0578821	0.00833536	327.293	0.13462	0.00943029	345.816	0.0255533	0.000846255	342.088	0.154889	0.00735486	349.463	0.0239869	0.00228149
330.564	0.121565	0.00683961	342.627	0.158932	0.0076988	345.116	0.0153532	0.00069281	338.168	0.117876	0.00137444	350.45	0.0697664	0.00435346	341.2	0.163662	0.00695676	359.581	0.0604579	0.00864405	327.585	0.137399	0.00950548	346.125	0.0258102	0.000831663	342.376	0.156977	0.00724072	349.737	0.0246177	0.00230596
330.864	0.123622	0.00686094	342.916	0.161127	0.00758159	345.404	0.0155488	0.000680845	338.479	0.118246	0.00119081	350.753	0.0711101	0.004433	341.504	0.165744	0.0068592	359.879	0.0631279	0.00895995	327.878	0.140199	0.00957961	346.434	0.0260629	0.000818117	342.665	0.159031	0.00712239	350.01	0.025255	0.00232916
331.164	0.125686	0.00688193	343.206	0.163286	0.00745953	345.691	0.0157409	0.000668413	338.789	0.118559	0.00100852	351.057	0.0724796	0.00451826	341.807	0.167795	0.00676036	360.177	0.0658941	0.00928298	328.17	0.14302	0.00965279	346.743	0.0263118	0.000805781	342.953	0.16105	0.00700024	350.284	0.0258982	0.00235104
331.463	0.127756	0.00690274	343.495	0.165408	0.00733299	345.978	0.0159293	0.000655539	339.1	0.118816	0.000828118	351.36	0.0738768	0.00460956	342.111	0.169817	0.0066607	360.475	0.0687587	0.00961303	328.462	0.145863	0.00972516	347.052	0.0265573	0.000794825	343.242	0.163033	0.00687467	350.557	0.026547	0.00237153
331.763	0.129832	0.0069235	343.785	0.167493	0.00720235	346.266	0.0161138	0.00064225	339.41	0.119018	0.000650158	351.663	0.0753037	0.00470727	342.414	0.171808	0.00656071	360.773	0.0717237	0.00994997	328.754	0.148726	0.00979687	347.361	0.0267999	0.000785424	343.53	0.164979	0.0067461	350.831	0.0272011	0.00239058
332.063	0.131914	0.00694438	344.074	0.169538	0.00706803	346.553	0.0162945	0.000628573	339.721	0.119165	0.000475197	351.966	0.0767622	0.00481171	342.718	0.173769	0.0064609	361.071	0.0747912	0.0102937	329.047	0.151611	0.00986807	347.669	0.0270402	0.00077776	343.818	0.166886	0.00661496	351.105	0.0278599	0.00240812
332.363	0.134003	0.00696554	344.363	0.171544	0.00693044	346.84	0.0164711	0.000614537	340.031	0.11926	0.000303803	352.269	0.0782544	0.00492322	343.021	0.1757	0.00636177	361.369	0.077963	0.010644	329.339	0.154516	0.00993894	347.978	0.0272786	0.000772018	344.107	0.168756	0.00648173	351.378	0.0285231	0.0024241
332.663	0.136098	0.00698714	344.653	0.17351	0.00679006	347.128	0.0166435	0.000600171	340.342	0.119302	0.000136548	352.572	0.0797828	0.00504213	343.325	0.177601	0.00626385	361.667	0.0812411	0.0110007	329.631	0.157442	0.0100096	348.287	0.027516	0.000768388	344.395	0.170586	0.00634688	351.652	0.0291903	0.00243847
332.963	0.1382	0.00700936	344.942	0.175433	0.00664735	347.415	0.0168118	0.000585506	340.652	0.119294	-2.59916e-05	352.875	0.0813495	0.00516877	343.628	0.179473	0.00616771	361.964	0.0846273	0.0113636	329.924	0.160388	0.0100804	348.596	0.0277529	0.000767065	344.684	0.172377	0.00621093	351.925	0.0298609	0.00245117
333.263	0.140308	0.00703239	345.232	0.177316	0.0065028	347.702	0.0169757	0.000570575	340.963	0.119237	-0.000183238	353.178	0.082957	0.00530345	343.932	0.181316	0.00607388	362.262	0.0881235	0.0117324	330.216	0.163355	0.0101513	348.905	0.0279902	0.000768249	344.972	0.174129	0.00607439	352.199	0.0305345	0.00246214
333.562	0.142424	0.0070564	345.521	0.179156	0.00635694	347.99	0.0171353	0.000555413	341.273	0.119133	-0.000334609	353.481	0.0846079	0.00544649	344.235	0.183132	0.00598295	362.56	0.0917313	0.0121071	330.508	0.166343	0.0102227	349.214	0.0282288	0.000772144	345.26	0.175842	0.00593781	352.472	0.0312106	0.00247134
333.862	0.144548	0.00708159	345.811	0.180953	0.0062103	348.277	0.0172905	0.000540052	341.584	0.118984	-0.000479524	353.785	0.0863048	0.00559818	344.539	0.184921	0.00589548	362.858	0.0954524	0.0124872	330.801	0.169352	0.0102947	349.523	0.0284694	0.000778956	345.549	0.177515	0.00580173	352.746	0.0318888	0.00247872
334.162	0.146679	0.00710817	346.1	0.182708	0.00606342	348.565	0.0174413	0.00052453	341.894	0.118793	-0.000617401	354.088	0.0880504	0.0057588	344.842	0.186685	0.00581208	363.156	0.0992882	0.0128725	331.093	0.172383	0.0103676	349.832	0.0287131	0.000788898	345.837	0.179149	0.00566674	353.02	0.0325684	0.00248424
334.462	0.148819	0.00713633	346.389	0.18442	0.00591688	348.852	0.0175875	0.000508883	342.205	0.11856	-0.000747662	354.391	0.0898474	0.00592862	345.146	0.188425	0.00573333	363.454	0.10324	0.0132626	331.385	0.175435	0.0104417	350.141	0.0289609	0.000802183	346.126	0.180745	0.00553342	353.293	0.0332491	0.00248784
334.762	0.150968	0.00716629	346.679	0.186091	0.00577126	349.139	0.0177292	0.00049315	342.515	0.11829	-0.000869731	354.694	0.0916988	0.00610789	345.449	0.190143	0.00565984	363.752	0.10731	0.0136573	331.677	0.178509	0.0105171	350.449	0.0292138	0.000819028	346.414	0.182303	0.00540237	353.567	0.0339302	0.00248949
335.062	0.153126	0.00719826	346.968	0.187719	0.00562715	349.427	0.0178664	0.000477369	342.826	0.117985	-0.000983035	354.997	0.0936074	0.00629686	345.753	0.19184	0.00559221	364.05	0.111499	0.0140562	331.97	0.181606	0.0105941	350.758	0.0294732	0.000839655	346.702	0.183824	0.0052742	353.84	0.0346112	0.00248915
335.362	0.155295	0.00723248	347.258	0.189307	0.00548517	349.714	0.017999	0.000461581	343.136	0.117648	-0.00108701	355.3	0.0955764	0.00649573	346.056	0.193519	0.00553105	364.348	0.115807	0.014459	332.262	0.184725	0.0106729	351.067	0.0297402	0.000864284	346.991	0.185309	0.00514954	354.114	0.0352915	0.00248678
335.661	0.157475	0.00726915	347.547	0.190854	0.00534593	350.001	0.0181272	0.000445827	343.447	0.117281	-0.00118109	355.603	0.0976086	0.0067047	346.36	0.195181	0.00547698	364.646	0.120237	0.0148652	332.554	0.187869	0.0107539	351.376	0.0300161	0.000893142	347.279	0.186759	0.00502901	354.388	0.0359707	0.00248236
335.961	0.159666	0.00730852	347.837	0.192362	0.00521007	350.289	0.0182508	0.000430148	343.757	0.116888	-0.00126473	355.906	0.0997074	0.00692393	346.663	0.196829	0.00543059	364.944	0.124789	0.0152744	332.847	0.191036	0.0108373	351.685	0.0303022	0.000926453	347.568	0.188176	0.00491326	354.661	0.0366481	0.00247586
336.261	0.161871	0.00735083	348.126	0.193832	0.00507822	350.576	0.0183699	0.000414588	344.068	0.116473	-0.00133739	356.209	0.101876	0.00715359	346.967	0.198466	0.00539249	365.242	0.129463	0.0156861	333.139	0.194229	0.0109234	351.994	0.0306002	0.000964446	347.856	0.189562	0.00480293	354.935	0.0373231	0.00246724
336.561	0.164088	0.00739632	348.415	0.195265	0.00495104	350.863	0.0184846	0.000399192	344.379	0.116038	-0.00139853	356.513	0.104117	0.00739378	347.27	0.200093	0.00536329	365.54	0.134261	0.0161	333.431	0.197448	0.0110124	352.303	0.0309113	0.00100735	348.144	0.190917	0.00469868	355.208	0.0379952	0.0024565
336.861	0.166321	0.00744523	348.705	0.196663	0.00482916	351.151	0.018595	0.000384003	344.689	0.115589	-0.00144763	356.816	0.106434	0.00764461	347.574	0.201715	0.00534359	365.838	0.139182	0.0165156	333.723	0.200694	0.0111047	352.612	0.0312373	0.00105539	348.433	0.192244	0.00460114	355.482	0.0386637	0.00244361
337.161	0.168569	0.00749781	348.994	0.198027	0.00471324	351.438	0.018701	0.000369068	345	0.115128	-0.00148418	357.119	0.10883	0.00790612	347.877	0.203334	0.00533396	366.136	0.144228	0.0169323	334.016	0.203968	0.0112006	352.921	0.0315798	0.00110879	348.721	0.193545	0.00451098	355.756	0.0393281	0.00242856
337.461	0.170835	0.00755433	349.284	0.199359	0.00460394	351.726	0.0188029	0.000354434	345.31	0.11466	-0.0015077	357.422	0.111309	0.00817836	348.181	0.204953	0.00533498	366.434	0.149398	0.0173497	334.308	0.207271	0.0113002	353.23	0.0319405	0.00116779	349.01	0.194822	0.00442886	356.029	0.0399878	0.00241134
337.76	0.173118	0.00761503	349.573	0.200662	0.00450192	352.013	0.0189006	0.000340148	345.621	0.114189	-0.00151768	357.725	0.113874	0.00846133	348.484	0.206576	0.00534722	366.732	0.154693	0.0177672	334.6	0.210604	0.0114039	353.538	0.0323213	0.00123261	349.298	0.196078	0.0043554	356.303	0.0406423	0.00239194
338.06	0.175421	0.00768018	349.863	0.201938	0.00440781	352.3	0.0189944	0.000326259	345.931	0.113719	-0.00151369	358.028	0.116528	0.00875498	348.788	0.208206	0.00537124	367.03	0.160111	0.0181843	334.893	0.213969	0.011512	353.847	0.0327239	0.00130348	349.586	0.197316	0.00429128	356.576	0.0412908	0.00237037
338.36	0.177745	0.00775004	350.152	0.203189	0.00432228	352.588	0.0190843	0.000312817	346.242	0.113254	-0.00149525	358.331	0.119274	0.00905924	349.091	0.209847	0.00540756	367.328	0.165654	0.0186003	335.185	0.217367	0.0116248	354.156	0.0331504	0.00138062	349.875	0.198537	0.00423711	356.85	0.0419328	0.00234663
338.66	0.180091	0.00782487	350.441	0.204418	0.00424596	352.875	0.0191704	0.000299874	346.552	0.1128	-0.00146195	358.634	0.122115	0.00937402	349.395	0.211503	0.0054567	367.626	0.17132	0.0190148	335.477	0.220799	0.0117425	354.465	0.0336027	0.00146424	350.163	0.199747	0.00419353	357.123	0.0425677	0.00232073
338.96	0.182462	0.00790494	350.731	0.205628	0.00417949	353.162	0.0192531	0.00028748	346.863	0.112361	-0.00141338	358.937	0.125055	0.00969916	349.698	0.213179	0.00551917	367.924	0.177109	0.019427	335.77	0.224267	0.0118654	354.774	0.0340829	0.00155458	350.452	0.200947	0.00416117	357.397	0.043195	0.00229269
339.26	0.184858	0.00799052	351.02	0.206821	0.00412349	353.45	0.0193323	0.000275688	347.173	0.111943	-0.00134915	359.241	0.128097	0.0100345	350.002	0.214877	0.00559543	368.222	0.18302	0.0198365	336.062	0.227773	0.0119938	355.083	0.0345931	0.00165184	350.74	0.202141	0.00414062	357.671	0.043814	0.00226251
339.56	0.187281	0.00808187	351.31	0.208002	0.00407857	353.737	0.0194083	0.000264554	347.484	0.111549	-0.00126888	359.544	0.131243	0.0103797	350.305	0.216602	0.00568593	368.52	0.189053	0.0202426	336.354	0.231318	0.012128	355.392	0.0351356	0.00175622	351.028	0.203333	0.00413248	357.944	0.0444241	0.00223023
339.859	0.189734	0.00817925	351.599	0.209173	0.00404534	354.024	0.0194813	0.000254132	347.794	0.111185	-0.00117223	359.847	0.134497	0.0107347	350.609	0.21836	0.00579111	368.818	0.195204	0.0206445	336.646	0.234904	0.0122681	355.701	0.0357126	0.00186795	351.317	0.204526	0.00413733	358.218	0.0450249	0.00219587
340.159	0.192217	0.00828294	351.889	0.210337	0.00402436	354.312	0.0195516	0.000244478	348.105	0.110856	-0.00105887	360.15	0.137861	0.011099	350.912	0.220154	0.00591137	369.116	0.201475	0.0210418	336.939	0.238532	0.0124145	356.01	0.0363265	0.00198721	351.605	0.205725	0.00415572	358.491	0.0456157	0.00215948
340.459	0.194734	0.00839318	352.178	0.2115	0.00401622	354.599	0.0196193	0.000235652	348.415	0.110567	-0.000928512	360.453	0.141338	0.0114724	351.216	0.221989	0.00604706	369.414	0.207862	0.0214337	337.231	0.242206	0.0125673	356.318	0.0369795	0.0021142	351.894	0.206932	0.00418819	358.765	0.046196	0.00212108
340.759	0.197286	0.00851024	352.467	0.212664	0.00402145	354.887	0.0196847	0.000227711	348.726	0.110325	-0.000780874	360.756	0.144932	0.0118544	351.519	0.223871	0.00619853	369.712	0.214364	0.0218195	337.523	0.245926	0.0127268	356.627	0.0376743	0.0022491	352.182	0.208154	0.00423526	359.039	0.0467653	0.00208072
341.059	0.199875	0.00863438	352.757	0.213833	0.00404058	355.174	0.0197482	0.000220718	349.036	0.110134	-0.000615708	361.059	0.148643	0.0122446	351.823	0.225803	0.00636609	370.01	0.220979	0.0221986	337.816	0.249694	0.0128932	356.936	0.0384132	0.00239209	352.47	0.209393	0.00429743	359.312	0.047323	0.00203845
341.359	0.202504	0.00876583	353.046	0.215012	0.0040741	355.461	0.0198099	0.000214735	349.347	0.109999	-0.000432794	361.362	0.152475	0.0126425	352.126	0.227791	0.00655	370.308	0.227705	0.0225703	338.108	0.253514	0.0130666	357.245	0.0391988	0.00254335	352.759	0.210655	0.00437514	359.586	0.0478686	0.00199434
341.659	0.205174	0.00890484	353.336	0.216205	0.00412249	355.749	0.0198702	0.000209825	349.657	0.109927	-0.000231936	361.665	0.15643	0.0130476	352.43	0.229839	0.00675049	370.606	0.234539	0.0229339	338.4	0.257386	0.0132473	357.554	0.0400337	0.00270303	353.047	0.211944	0.00446885	359.859	0.0484017	0.00194843
341.958	0.207888	0.00905164	353.625	0.217417	0.00418621	356.036	0.0199294	0.000206056	349.968	0.109923	-1.29704e-05	361.969	0.16051	0.0134593	352.733	0.231954	0.00696777	370.904	0.241478	0.0232887	338.692	0.261313	0.0134353	357.863	0.0409207	0.00287128	353.336	0.213264	0.00457896	360.133	0.0489217	0.0019008
342.258	0.210649	0.00920646	353.915	0.218652	0.00426566	356.323	0.0199879	0.000203494	350.278	0.109993	0.000224238	362.272	0.164716	0.013877	353.037	0.23414	0.00720198	371.202	0.248521	0.0236341	338.985	0.265297	0.0136309	358.172	0.0418622	0.00304825	353.624	0.214622	0.00470585	360.407	0.0494283	0.00185151
342.558	0.213458	0.00936952	354.204	0.219914	0.00436123	356.611	0.020046	0.00020221	350.589	0.110142	0.000479795	362.575	0.169051	0.0143	353.34	0.236402	0.00745324	371.5	0.255664	0.0239692	339.277	0.269341	0.013834	358.481	0.0428612	0.00323406	353.912	0.21602	0.00484985	360.68	0.0499209	0.00180065
342.858	0.216319	0.00954102	354.493	0.221209	0.00447328	356.898	0.0201041	0.000202277	350.899	0.110376	0.000753773	362.878	0.173515	0.0147277	353.644	0.238745	0.00772162	371.798	0.262903	0.0242936	339.569	0.273446	0.0140449	358.79	0.0439204	0.00342883	354.201	0.217466	0.00501128	360.954	0.0503992	0.00174831
343.158	0.219234	0.00972115	354.783	0.222541	0.00460213	357.185	0.0201626	0.000203768	351.21	0.110701	0.00104621	363.181	0.17811	0.0151592	353.947	0.241175	0.00800714	372.096	0.270236	0.0246063	339.862	0.277615	0.0142635	359.099	0.0450425	0.00363267	354.489	0.218962	0.00519041	361.227	0.0508629	0.00169456
343.458	0.222206	0.0099101	355.072	0.223915	0.00474807	357.473	0.0202221	0.000206761	351.521	0.111122	0.00135712	363.484	0.182836	0.0155939	354.251	0.243697	0.0083098	372.394	0.277658	0.0249069	340.154	0.281851	0.0144899	359.407	0.0462304	0.00384566	354.778	0.220516	0.00538746	361.501	0.0513114	0.0016395
343.758	0.225237	0.010108	355.362	0.225336	0.00491133	357.76	0.0202828	0.000211335	351.831	0.111646	0.00168648	363.787	0.187696	0.0160309	354.554	0.246316	0.00862953	372.692	0.285165	0.0251945	340.446	0.286154	0.0147241	359.716	0.0474869	0.00406789	355.066	0.222132	0.00560264	361.775	0.0517446	0.00158323
344.057	0.22833	0.0103151	355.651	0.22681	0.00509214	358.048	0.0203453	0.000217572	352.142	0.112278	0.00203422	364.09	0.192688	0.0164693	354.858	0.249038	0.00896621	372.99	0.292755	0.0254685	340.739	0.290529	0.014966	360.025	0.048815	0.0042994	355.354	0.223815	0.00583609	362.048	0.052162	0.00152587
344.357	0.231488	0.0105314	355.941	0.228342	0.00529067	358.335	0.0204101	0.000225559	352.452	0.113023	0.00240025	364.394	0.197813	0.0169081	355.161	0.251866	0.00931969	373.288	0.300422	0.0257283	341.031	0.294976	0.0152157	360.334	0.0502175	0.00454026	355.643	0.225571	0.00608792	362.322	0.0525635	0.00146751
344.657	0.234713	0.0107571	356.23	0.229935	0.00550703	358.622	0.0204778	0.000235382	352.763	0.113888	0.00278443	364.697	0.203071	0.0173466	355.465	0.254807	0.00968976	373.586	0.308161	0.0259733	341.323	0.299499	0.015473	360.643	0.0516972	0.00479048	355.931	0.227405	0.0063582	362.595	0.0529488	0.00140829
344.957	0.238009	0.0109923	356.519	0.231597	0.00574131	358.91	0.0205488	0.000247134	353.073	0.114877	0.0031866	365	0.208461	0.0177836	355.768	0.257865	0.0100762	373.884	0.31597	0.0262027	341.615	0.304099	0.0157379	360.952	0.0532572	0.00505008	356.22	0.229321	0.00664695	362.869	0.0533177	0.00134831
345.257	0.241379	0.011237	356.809	0.233332	0.00599357	359.197	0.0206238	0.000260909	353.384	0.115997	0.00360656	365.303	0.213983	0.0182182	356.072	0.261045	0.0104786	374.182	0.323841	0.0264159	341.908	0.308779	0.0160101	361.261	0.0549002	0.00531905	356.508	0.231327	0.00695414	363.142	0.05367	0.00128771
345.557	0.244825	0.0114913	357.098	0.235145	0.0062638	359.484	0.0207033	0.000276806	353.694	0.117253	0.00404405	365.606	0.219636	0.0186494	356.375	0.264352	0.0108967	374.48	0.331772	0.0266124	342.2	0.31354	0.0162896	361.57	0.0566292	0.00559737	356.796	0.233426	0.0072797	363.416	0.0540056	0.00122662
345.857	0.24835	0.0117552	357.388	0.237041	0.00655195	359.772	0.0207881	0.000294926	354.005	0.11865	0.00449879	365.909	0.225418	0.0190761	356.679	0.267791	0.01133	374.778	0.339755	0.0267915	342.492	0.318385	0.016576	361.879	0.058447	0.00588498	357.085	0.235625	0.00762351	363.69	0.0543244	0.00116517
346.156	0.251957	0.0120288	357.677	0.239026	0.00685794	360.059	0.0208787	0.000315376	354.315	0.120193	0.00497046	366.212	0.231328	0.0194971	356.982	0.271366	0.0117782	375.076	0.347787	0.0269527	342.785	0.323316	0.0168692	362.187	0.0603565	0.00618181	357.373	0.237928	0.00798539	363.963	0.0546263	0.00110352
346.456	0.255648	0.012312	357.967	0.241105	0.00718162	360.347	0.0209759	0.000338265	354.626	0.121888	0.00545869	366.515	0.237363	0.0199114	357.286	0.275081	0.0122407	375.374	0.355861	0.0270954	343.077	0.328334	0.0171689	362.496	0.0623606	0.0064878	357.662	0.240341	0.00836514	364.237	0.0549113	0.0010418
346.756	0.259428	0.0126047	358.256	0.243282	0.00752282	360.634	0.0210804	0.000363707	354.936	0.12374	0.00596309	366.818	0.243522	0.0203178	357.589	0.27894	0.0127169	375.672	0.363972	0.0272191	343.369	0.333442	0.0174748	362.805	0.0644619	0.00680281	357.95	0.242868	0.00876249	364.51	0.0551795	0.000980178
347.056	0.263298	0.0129069	358.546	0.245563	0.0078813	360.921	0.021193	0.000391821	355.247	0.125753	0.00648321	367.122	0.249801	0.0207152	357.893	0.282948	0.0132062	375.97	0.372114	0.0273232	343.662	0.338641	0.0177864	363.114	0.0666633	0.00712672	358.238	0.245514	0.00917712	364.784	0.0554309	0.000918804
347.356	0.267262	0.0132184	358.835	0.247953	0.00825679	361.209	0.0213145	0.000422729	355.557	0.127932	0.00701856	367.425	0.256197	0.0211024	358.196	0.287109	0.0137081	376.268	0.380281	0.0274074	343.954	0.343933	0.0181035	363.423	0.0689675	0.00745938	358.527	0.248285	0.00960866	365.058	0.0556655	0.000857843
347.656	0.271322	0.0135392	359.124	0.250456	0.00864895	361.496	0.0214457	0.000456559	355.868	0.130283	0.00756861	367.728	0.262708	0.0214782	358.5	0.291425	0.0142217	376.566	0.388467	0.027471	344.246	0.349318	0.0184257	363.732	0.0713771	0.0078006	358.815	0.251186	0.0100567	365.331	0.0558837	0.000797462
347.956	0.275481	0.013869	359.414	0.253078	0.00905743	361.783	0.0215875	0.000493442	356.178	0.132808	0.0081328	368.031	0.269328	0.0218414	358.803	0.2959	0.0147463	376.864	0.396666	0.0275138	344.538	0.3548	0.0187524	364.041	0.0738946	0.00815019	359.104	0.25422	0.0105208	365.605	0.0560856	0.000737833
348.255	0.279741	0.0142077	359.703	0.255822	0.00948181	362.071	0.0217408	0.000533516	356.489	0.135513	0.00871052	368.334	0.276054	0.0221909	359.107	0.300538	0.0152812	377.162	0.404872	0.0275353	344.831	0.360377	0.0190831	364.35	0.0765226	0.00850791	359.392	0.257392	0.0110003	365.878	0.0562714	0.000679132
348.555	0.284105	0.014555	359.993	0.258694	0.00992161	362.358	0.0219066	0.000576921	356.799	0.138401	0.00930111	368.637	0.282882	0.0225254	359.41	0.305341	0.0158254	377.46	0.413077	0.027535	345.123	0.366053	0.0194175	364.659	0.0792636	0.00887351	359.68	0.260707	0.0114949	366.152	0.0564414	0.00062154
348.855	0.288576	0.0149106	360.282	0.261697	0.0103763	362.645	0.0220858	0.000623806	357.11	0.141476	0.00990388	368.94	0.289806	0.0228437	359.714	0.310312	0.0163782	377.758	0.421275	0.0275127	345.415	0.371827	0.0197548	364.968	0.0821199	0.00924672	359.969	0.264169	0.0120038	366.426	0.0565961	0.000565241
349.155	0.293156	0.0152742	360.572	0.264836	0.0108454	362.933	0.0222796	0.000674321	357.42	0.144743	0.0105181	369.243	0.296822	0.0231447	360.017	0.315453	0.0169385	378.056	0.429461	0.0274681	345.708	0.377701	0.0200946	365.276	0.0850937	0.00962723	360.257	0.267782	0.0125263	366.699	0.0567357	0.000510425
349.455	0.297848	0.0156456	360.861	0.268115	0.0113283	363.22	0.022489	0.000728624	357.731	0.148203	0.011143	369.546	0.303923	0.0234272	360.321	0.320766	0.0175055	378.354	0.437626	0.0274008	346	0.383674	0.0204362	365.585	0.0881872	0.0100147	360.546	0.271549	0.0130618	366.973	0.0568608	0.000457283
349.755	0.302653	0.0160242	361.15	0.271537	0.0118243	363.508	0.0227151	0.000786878	358.041	0.15186	0.0117777	369.85	0.311104	0.0236899	360.624	0.326252	0.0180781	378.652	0.445764	0.0273106	346.292	0.389748	0.0207789	365.894	0.0914024	0.0104088	360.834	0.275474	0.0136096	367.246	0.0569719	0.000406012
350.055	0.307573	0.0164097	361.44	0.275106	0.0123327	363.795	0.0229592	0.00084925	358.352	0.155717	0.0124214	370.153	0.318358	0.0239319	360.928	0.331914	0.0186553	378.95	0.453869	0.0271972	346.584	0.395922	0.0211222	366.203	0.0947413	0.0108092	361.122	0.27956	0.0141687	367.52	0.0570695	0.000356811
350.354	0.312612	0.0168017	361.729	0.278826	0.0128528	364.082	0.0232224	0.000915913	358.663	0.159776	0.0130731	370.456	0.325678	0.0241519	361.231	0.337752	0.0192359	379.248	0.461932	0.0270606	346.877	0.402196	0.0214652	366.512	0.0982056	0.0112154	361.411	0.283811	0.0147385	367.793	0.0571543	0.000309885
350.654	0.317769	0.0171997	362.019	0.2827	0.0133839	364.37	0.023506	0.000987045	358.973	0.164041	0.0137321	370.759	0.333059	0.0243489	361.534	0.343767	0.019819	379.546	0.469949	0.0269004	347.169	0.40857	0.0218072	366.821	0.101797	0.011627	361.699	0.288228	0.0153179	368.067	0.0572269	0.000265439
350.954	0.323048	0.017603	362.308	0.28673	0.0139252	364.657	0.0238114	0.00106283	359.284	0.168511	0.0143971	371.062	0.340492	0.0245218	361.838	0.349959	0.0204033	379.844	0.47791	0.0267166	347.461	0.415044	0.0221476	367.13	0.105517	0.0120435	361.988	0.292816	0.0159061	368.341	0.0572881	0.000223683
351.254	0.328448	0.0180113	362.598	0.29092	0.0144757	364.944	0.02414	0.00114346	359.594	0.17319	0.0150673	371.365	0.347969	0.0246695	362.141	0.356329	0.0209877	380.142	0.485809	0.0265092	347.754	0.421616	0.0224855	367.439	0.109368	0.0124645	362.276	0.297575	0.0165021	368.614	0.0573387	0.00018483
351.554	0.333973	0.0184238	362.887	0.295272	0.0150347	365.232	0.0244932	0.00122912	359.905	0.178078	0.0157416	371.668	0.355484	0.0247911	362.445	0.362876	0.0215711	380.44	0.49364	0.026278	348.046	0.428286	0.0228201	367.748	0.113349	0.0128895	362.564	0.302508	0.0171049	368.888	0.0573795	0.000149095
351.854	0.339622	0.01884	363.176	0.299787	0.0156012	365.519	0.0248726	0.00132002	360.215	0.183176	0.0164189	371.971	0.363027	0.0248856	362.748	0.369599	0.0221522	380.738	0.501395	0.0260231	348.338	0.435053	0.0231507	368.056	0.117463	0.0133179	362.853	0.307616	0.0177135	369.161	0.0574114	0.000116696
352.154	0.345397	0.0192592	363.466	0.304468	0.0161743	365.806	0.0252796	0.00141636	360.526	0.188486	0.017098	372.274	0.37059	0.0249521	363.052	0.376497	0.0227298	381.036	0.509066	0.0257444	348.631	0.441915	0.0234763	368.365	0.12171	0.0137491	363.141	0.312902	0.0183267	369.435	0.0574355	8.78533e-05
352.454	0.351299	0.0196806	363.755	0.309317	0.0167531	366.094	0.0257159	0.00151835	360.836	0.194006	0.0177779	372.578	0.378165	0.0249898	363.355	0.38357	0.0233026	381.334	0.516648	0.025442	348.923	0.448871	0.0237962	368.674	0.126091	0.0141827	363.43	0.318365	0.0189436	369.709	0.0574526	6.27899e-05
352.753	0.357327	0.0201037	364.045	0.314335	0.0173364	366.381	0.0261832	0.0016262	361.147	0.199737	0.0184572	372.881	0.385742	0.0249979	363.659	0.390814	0.0238694	381.632	0.524132	0.0251161	349.215	0.455918	0.0241095	368.983	0.130606	0.014618	363.718	0.324007	0.019563	369.982	0.0574641	4.17304e-05
353.053	0.363482	0.0205276	364.334	0.319523	0.0179233	366.669	0.0266833	0.00174013	361.457	0.205679	0.0191349	373.184	0.393312	0.0249755	363.962	0.398228	0.0244291	381.93	0.531512	0.0247666	349.507	0.463054	0.0244153	369.292	0.135256	0.0150544	364.006	0.329828	0.0201837	370.256	0.0574709	2.49016e-05
353.353	0.369765	0.0209514	364.624	0.324881	0.0185129	366.956	0.0272179	0.00186037	361.768	0.211831	0.0198095	373.487	0.400867	0.0249221	364.266	0.40581	0.0249802	382.228	0.538782	0.0243939	349.8	0.470278	0.0247127	369.601	0.140042	0.0154912	364.295	0.335828	0.0208046	370.529	0.0574743	1.25318e-05
353.653	0.376174	0.0213745	364.913	0.33041	0.0191039	367.243	0.0277889	0.00198714	362.078	0.21819	0.02048	373.79	0.408395	0.024837	364.569	0.413555	0.0255215	382.526	0.545933	0.023998	350.092	0.477585	0.0250009	369.91	0.144962	0.0159278	364.583	0.342007	0.0214244	370.803	0.0574756	4.85119e-06
353.953	0.38271	0.021796	365.202	0.33611	0.0196953	367.531	0.0283983	0.00212068	362.389	0.224756	0.0211449	374.093	0.415888	0.0247197	364.873	0.421462	0.0260518	382.824	0.552959	0.0235792	350.384	0.484974	0.0252791	370.219	0.150016	0.0163635	364.872	0.348363	0.0220419	371.077	0.0574762	2.09094e-06
354.253	0.389371	0.022215	365.492	0.341982	0.0202861	367.818	0.0290481	0.00226121	362.699	0.231526	0.021803	374.396	0.423335	0.0245697	365.176	0.429526	0.0265698	383.122	0.559854	0.0231378	350.677	0.492441	0.0255462	370.528	0.155205	0.0167977	365.16	0.354897	0.022656	371.35	0.0574774	4.48356e-06
354.553	0.396157	0.0226306	365.781	0.348024	0.0208751	368.105	0.0297403	0.00240897	363.01	0.238498	0.0224529	374.699	0.430727	0.0243866	365.48	0.437743	0.0270743	383.42	0.566611	0.022674	350.969	0.499983	0.0258016	370.837	0.160527	0.0172296	365.448	0.361607	0.0232654	371.624	0.0574808	1.22625e-05
354.852	0.403066	0.0230419	366.071	0.354235	0.0214613	368.393	0.0304772	0.00256421	363.32	0.245669	0.0230933	375.002	0.438053	0.02417	365.783	0.446108	0.027564	383.718	0.573223	0.0221883	351.261	0.507596	0.0260443	371.145	0.165982	0.0176584	365.737	0.368491	0.0238689	371.897	0.0574878	2.56617e-05
355.152	0.410097	0.0234479	366.36	0.360615	0.0220434	368.68	0.0312609	0.00272717	363.631	0.253036	0.0237227	375.306	0.445304	0.0239197	366.087	0.454618	0.0280377	384.016	0.579683	0.0216809	351.553	0.515275	0.0262734	371.454	0.171568	0.0180836	366.025	0.375547	0.0244652	372.171	0.0575001	4.49161e-05
355.452	0.417248	0.0238479	366.65	0.367162	0.0226204	368.967	0.0320937	0.00289808	363.941	0.260594	0.0243399	375.609	0.452468	0.0236355	366.39	0.463266	0.0284943	384.314	0.585987	0.0211522	351.846	0.523017	0.0264882	371.763	0.177283	0.0185042	366.314	0.382772	0.025053	372.445	0.0575193	7.02603e-05
355.752	0.424517	0.0242407	366.939	0.373875	0.0231911	369.255	0.032978	0.00307721	364.252	0.268339	0.0249435	375.912	0.459536	0.0233174	366.694	0.472047	0.0289324	384.612	0.592126	0.0206028	352.138	0.530818	0.0266878	372.072	0.183128	0.0189197	366.602	0.390164	0.0256311	372.718	0.0575472	0.00010193
356.052	0.431901	0.0246254	367.228	0.38075	0.0237545	369.542	0.0339162	0.00326478	364.562	0.276268	0.025532	376.215	0.466497	0.0229653	366.997	0.480955	0.029351	384.91	0.598096	0.0200329	352.43	0.538673	0.0268715	372.381	0.189098	0.0193291	366.89	0.397719	0.0261983	372.992	0.0575855	0.000140158
356.352	0.439398	0.0250011	367.518	0.387786	0.0243094	369.83	0.0349108	0.00346106	364.873	0.284373	0.0261041	376.518	0.473341	0.0225793	367.301	0.489983	0.029749	385.208	0.60389	0.0194432	352.723	0.546576	0.0270384	372.69	0.195193	0.0197318	367.179	0.405435	0.0267533	373.265	0.0576362	0.000185181
356.652	0.447005	0.0253668	367.807	0.394979	0.0248547	370.117	0.0359643	0.00366629	365.183	0.292651	0.0266585	376.821	0.480058	0.0221597	367.604	0.499126	0.0301252	385.506	0.609502	0.0188341	353.015	0.554523	0.0271878	372.999	0.20141	0.020127	367.467	0.413307	0.027295	373.539	0.0577011	0.000237232
356.951	0.454717	0.0257215	368.097	0.402328	0.0253893	370.404	0.0370795	0.00388071	365.494	0.301096	0.0271936	377.124	0.486637	0.0217065	367.908	0.508376	0.0304786	385.804	0.614927	0.0182062	353.307	0.562508	0.0273191	373.308	0.207747	0.020514	367.756	0.42133	0.027822	373.812	0.0577822	0.000296542
357.251	0.462533	0.0260642	368.386	0.409828	0.0259121	370.692	0.038259	0.00410456	365.804	0.3097	0.0277083	377.427	0.493069	0.0212203	368.211	0.517727	0.0308081	386.102	0.62016	0.01756	353.6	0.570526	0.0274315	373.617	0.2142	0.0208919	368.044	0.429502	0.0283333	374.086	0.0578817	0.000363344
357.551	0.470447	0.026394	368.676	0.417475	0.0264221	370.979	0.0395056	0.00433809	366.115	0.318457	0.0282011	377.73	0.499344	0.0207013	368.515	0.527169	0.0311128	386.4	0.625195	0.0168961	353.892	0.578571	0.0275244	373.925	0.220768	0.0212601	368.332	0.437816	0.0288276	374.36	0.0580014	0.000437868
357.851	0.478457	0.0267099	368.965	0.425266	0.0269181	371.266	0.0408222	0.00458154	366.426	0.32736	0.0286708	378.034	0.505452	0.0201502	368.818	0.536696	0.0313917	386.698	0.630027	0.0162152	354.184	0.586638	0.0275972	374.234	0.227445	0.0216177	368.621	0.446267	0.0293038	374.633	0.0581438	0.000520341
358.151	0.486556	0.027011	369.254	0.433196	0.0273992	371.554	0.0422117	0.00483514	366.736	0.336401	0.029116	378.337	0.511383	0.0195676	369.122	0.5463	0.031644	386.996	0.634651	0.0155179	354.476	0.594719	0.0276493	374.543	0.23423	0.021964	368.909	0.45485	0.0297608	374.907	0.058311	0.000610988
358.451	0.494741	0.0272963	369.544	0.441261	0.0278644	371.841	0.043677	0.00509913	367.047	0.345572	0.0295355	378.64	0.517128	0.0189541	369.425	0.555972	0.0318688	387.294	0.639063	0.0148049	354.769	0.60281	0.0276802	374.852	0.241118	0.0222984	369.197	0.463559	0.0301976	375.18	0.0585052	0.000710034
358.751	0.503007	0.027565	369.833	0.449456	0.0283127	372.128	0.0452212	0.00537371	367.357	0.354866	0.029928	378.943	0.522678	0.0183105	369.729	0.565704	0.0320653	387.592	0.643257	0.0140768	355.061	0.610904	0.0276894	375.161	0.248105	0.02262	369.486	0.472387	0.030613	375.454	0.0587289	0.000817698
359.05	0.511348	0.027816	370.123	0.457775	0.0287432	372.416	0.0468474	0.00565913	367.668	0.364272	0.0302924	379.246	0.528025	0.0176377	370.032	0.575487	0.0322327	387.89	0.647231	0.0133343	355.353	0.618993	0.0276765	375.47	0.255187	0.0229282	369.774	0.481329	0.031006	375.728	0.0589845	0.000934198
359.35	0.519758	0.0280486	370.412	0.466213	0.0291548	372.703	0.0485588	0.00595557	367.978	0.373782	0.0306274	379.549	0.533158	0.0169367	370.336	0.585311	0.0323704	388.188	0.650979	0.0125783	355.646	0.627073	0.027641	375.779	0.26236	0.0232223	370.063	0.490378	0.0313758	376.001	0.0592745	0.00105975
359.65	0.528233	0.0282619	370.702	0.474765	0.0295469	372.991	0.0503587	0.00626326	368.289	0.383387	0.030932	379.852	0.538071	0.0162085	370.639	0.595168	0.0324777	388.486	0.654498	0.0118094	355.938	0.635135	0.0275828	376.088	0.26962	0.0235016	370.351	0.499526	0.0317214	376.275	0.0596013	0.00119455
359.95	0.536765	0.0284552	370.991	0.483424	0.0299184	373.278	0.0522502	0.00658237	368.599	0.393077	0.0312052	380.155	0.542756	0.0154541	370.943	0.605048	0.0325541	388.784	0.657785	0.0110285	356.23	0.643174	0.0275014	376.397	0.276961	0.0237655	370.639	0.508767	0.0320418	376.548	0.0599676	0.00133882
360.25	0.54535	0.0286275	371.28	0.492185	0.0302686	373.565	0.0542368	0.0069131	368.91	0.402842	0.0314458	380.458	0.547204	0.0146749	371.246	0.614942	0.032599	389.082	0.660835	0.0102362	356.522	0.651182	0.0273967	376.706	0.284378	0.0240134	370.928	0.518093	0.0323363	376.822	0.060376	0.00149276
360.55	0.553979	0.0287783	371.57	0.50104	0.0305967	373.853	0.0563218	0.00725561	369.22	0.412671	0.031653	380.762	0.551409	0.013872	371.55	0.624839	0.032612	389.38	0.663646	0.00943336	356.815	0.659152	0.0272684	377.014	0.291868	0.0242446	371.216	0.527496	0.0326041	377.096	0.0608292	0.00165655
360.85	0.562647	0.0289068	371.859	0.509984	0.0309021	374.14	0.0585087	0.00761007	369.531	0.422554	0.0318259	381.065	0.555363	0.0130468	371.853	0.634731	0.0325927	389.678	0.666215	0.00862087	357.107	0.667078	0.0271166	377.323	0.299423	0.0244587	371.505	0.536968	0.0328445	377.369	0.06133	0.00183039
361.149	0.571347	0.0290123	372.149	0.51901	0.031184	374.427	0.0608009	0.00797662	369.841	0.432479	0.0319637	381.368	0.559061	0.0122007	372.157	0.644607	0.0325408	389.976	0.668539	0.00779949	357.399	0.674953	0.026941	377.632	0.307038	0.024655	371.793	0.546502	0.0330568	377.643	0.0618811	0.00201445
361.449	0.580071	0.0290942	372.438	0.52811	0.0314418	374.715	0.0632019	0.00835539	370.152	0.442436	0.0320655	381.671	0.562497	0.0113352	372.46	0.654457	0.0324559	390.274	0.670616	0.00697008	357.692	0.682769	0.0267417	377.941	0.314709	0.0248331	372.081	0.556088	0.0332403	377.916	0.0624854	0.00220893
361.749	0.588812	0.0291521	372.728	0.537278	0.0316748	375.002	0.0657154	0.0087465	370.462	0.452413	0.0321307	381.974	0.565665	0.0104519	372.764	0.664272	0.032338	390.572	0.672444	0.00613348	357.984	0.69052	0.0265188	378.25	0.322429	0.0249926	372.37	0.565719	0.0333946	378.19	0.0631459	0.00241397
362.049	0.597564	0.0291852	373.017	0.546506	0.0318827	375.289	0.0683448	0.00915005	370.773	0.462399	0.0321588	382.277	0.568561	0.00955217	373.067	0.67404	0.0321868	390.87	0.67402	0.00529054	358.276	0.6982	0.0262724	378.559	0.330193	0.0251329	372.658	0.575386	0.0335192	378.464	0.0638654	0.00262975
362.349	0.606318	0.0291933	373.306	0.555786	0.0320648	375.577	0.0710937	0.00956612	371.083	0.472382	0.0321491	382.58	0.571179	0.00863782	373.371	0.683753	0.0320023	391.168	0.675344	0.00444213	358.569	0.7058	0.0260026	378.868	0.337993	0.0252536	372.947	0.58508	0.0336135	378.737	0.0646468	0.00285642
362.649	0.615066	0.0291759	373.596	0.565112	0.0322207	375.864	0.0739659	0.00999477	371.394	0.48235	0.0321013	382.883	0.573516	0.0077105	373.674	0.693399	0.0317844	391.466	0.676414	0.00358912	358.861	0.713315	0.0257096	379.177	0.345825	0.0253545	373.235	0.594792	0.0336774	379.011	0.0654934	0.00309411
362.949	0.623802	0.0291327	373.885	0.574475	0.0323501	376.152	0.0769649	0.0104361	371.704	0.492292	0.0320149	383.186	0.575569	0.00677194	373.978	0.70297	0.0315333	391.764	0.677228	0.00273239	359.153	0.720737	0.0253939	379.486	0.353682	0.0254353	373.523	0.604514	0.0337104	379.284	0.066408	0.00334297
363.248	0.632517	0.0290633	374.175	0.583868	0.0324525	376.439	0.0800943	0.01089	372.015	0.502194	0.0318898	383.49	0.577334	0.00582392	374.281	0.712454	0.0312489	392.062	0.677786	0.00187281	359.445	0.728061	0.0250556	379.794	0.361558	0.0254955	373.812	0.614237	0.0337123	379.558	0.0673937	0.00360312
363.548	0.641203	0.0289676	374.464	0.593282	0.0325278	376.726	0.0833577	0.0113566	372.325	0.512046	0.0317257	383.793	0.57881	0.00486823	374.585	0.721841	0.0309316	392.36	0.678087	0.00101129	359.738	0.735279	0.0246952	380.103	0.369445	0.0255351	374.1	0.623951	0.033683	379.831	0.0684538	0.00387466
363.848	0.649852	0.0288453	374.754	0.602711	0.0325756	377.014	0.0867589	0.0118358	372.636	0.521834	0.0315225	384.096	0.579994	0.00390671	374.888	0.731123	0.0305815	392.658	0.678132	0.000148693	360.03	0.742386	0.0243131	380.412	0.377339	0.0255537	374.389	0.633648	0.0336223	380.105	0.0695913	0.0041577
364.148	0.658457	0.0286964	375.043	0.612145	0.0325958	377.301	0.0903014	0.0123276	372.946	0.531547	0.0312804	384.399	0.580885	0.00294121	375.192	0.740288	0.0301989	392.956	0.677919	-0.00071408	360.322	0.749375	0.0239099	380.721	0.385231	0.0255514	374.677	0.643318	0.0335303	380.379	0.0708094	0.00445233
364.448	0.667009	0.0285208	375.332	0.621577	0.0325882	377.588	0.0939889	0.0128319	373.257	0.541173	0.0309992	384.702	0.581484	0.0019736	375.495	0.749327	0.0297841	393.254	0.677449	-0.00157614	360.615	0.75624	0.023486	381.03	0.393117	0.0255279	374.965	0.652952	0.033407	380.652	0.0721113	0.00475862
364.748	0.675501	0.0283185	375.622	0.630999	0.0325528	377.876	0.0978248	0.0133486	373.568	0.5507	0.0306794	385.005	0.581788	0.00100578	375.799	0.758231	0.0293376	393.552	0.676723	-0.00243661	360.907	0.762975	0.0230421	381.339	0.400988	0.0254832	375.254	0.662542	0.0332524	380.926	0.0735003	0.00507664
365.048	0.683924	0.0280896	375.911	0.640402	0.0324896	378.163	0.101813	0.0138776	373.878	0.560115	0.0303211	385.308	0.5818	3.96278e-05	376.102	0.76699	0.0288599	393.85	0.675741	-0.00329459	361.199	0.769574	0.0225789	381.648	0.40884	0.0254173	375.542	0.672079	0.0330667	381.199	0.0749794	0.00540643
365.347	0.69227	0.0278343	376.201	0.649779	0.0323984	378.45	0.105956	0.0144187	374.189	0.569407	0.0299247	385.611	0.581521	-0.000922964	376.406	0.775595	0.0283513	394.148	0.674505	-0.00414921	361.491	0.776033	0.0220969	381.957	0.416664	0.0253303	375.831	0.681553	0.0328502	381.473	0.076552	0.00574802
365.647	0.700532	0.0275527	376.49	0.659122	0.0322795	378.738	0.110259	0.0149718	374.499	0.578565	0.0294908	385.914	0.580951	-0.00188011	376.709	0.784036	0.0278126	394.446	0.673015	-0.00499959	361.784	0.782346	0.021597	382.266	0.424455	0.0252221	376.119	0.690955	0.0326032	381.747	0.0782213	0.00610144
365.947	0.708702	0.0272451	376.78	0.668422	0.0321329	379.025	0.114723	0.0155366	374.81	0.587576	0.02902	386.218	0.580093	-0.00282993	377.013	0.792304	0.0272443	394.744	0.671273	-0.00584486	362.076	0.788507	0.0210799	382.575	0.432206	0.025093	376.407	0.700278	0.0323259	382.02	0.0799905	0.00646668
366.247	0.716772	0.0269118	377.069	0.677672	0.0319588	379.313	0.119354	0.0161129	375.12	0.59643	0.0285128	386.521	0.57895	-0.00377057	377.316	0.800392	0.026647	395.042	0.669282	-0.00668415	362.368	0.794513	0.0205464	382.883	0.439911	0.0249431	376.696	0.709512	0.0320189	382.294	0.0818629	0.00684373
366.547	0.724734	0.0265533	377.359	0.686864	0.0317573	379.6	0.124153	0.0167004	375.431	0.605115	0.0279702	386.824	0.577525	-0.00470018	377.62	0.808289	0.0260214	395.34	0.667042	-0.00751662	362.661	0.800358	0.0199973	383.192	0.447563	0.0247725	376.984	0.718649	0.0316826	382.567	0.0838416	0.00723255
366.847	0.732581	0.0261698	377.648	0.695989	0.0315288	379.887	0.129124	0.0172988	375.741	0.613622	0.0273929	387.127	0.575823	-0.00561696	377.923	0.815988	0.0253684	395.638	0.664556	-0.00834141	362.953	0.806038	0.0194335	383.501	0.455156	0.0245816	377.273	0.727681	0.0313175	382.841	0.08593	0.00763309
367.147	0.740306	0.0257621	377.937	0.705041	0.0312735	380.175	0.13427	0.0179078	376.052	0.621938	0.0267821	387.43	0.573847	-0.00651913	378.227	0.823481	0.0246886	395.936	0.661827	-0.00915769	363.245	0.81155	0.0188559	383.81	0.462684	0.0243706	377.561	0.7366	0.0309243	383.115	0.0881311	0.00804527
367.446	0.747902	0.0253305	378.227	0.71401	0.0309918	380.462	0.139594	0.018527	376.362	0.630055	0.0261386	387.733	0.571602	-0.00740495	378.53	0.83076	0.0239829	396.234	0.658858	-0.00996463	363.538	0.816889	0.0182654	384.119	0.470141	0.0241399	377.849	0.745397	0.0305035	383.388	0.0904481	0.00846901
367.746	0.755361	0.0248756	378.516	0.722891	0.030684	380.749	0.145099	0.0191559	376.673	0.637962	0.0254637	388.036	0.569095	-0.00827272	378.834	0.837817	0.0232522	396.532	0.655651	-0.0107614	363.83	0.822052	0.0176629	384.428	0.47752	0.0238897	378.138	0.754065	0.0300558	383.662	0.0928842	0.00890419
368.046	0.762677	0.0243982	378.806	0.731676	0.0303506	381.037	0.150787	0.0197942	376.983	0.64565	0.0247586	388.339	0.56633	-0.00912078	379.137	0.844645	0.0224972	396.829	0.65221	-0.0115473	364.122	0.827035	0.0170494	384.737	0.484816	0.0236206	378.426	0.762596	0.0295821	383.935	0.0954425	0.00935068
368.346	0.769843	0.023899	379.095	0.740356	0.0299919	381.324	0.156661	0.0204414	377.294	0.65311	0.0240246	388.642	0.563315	-0.00994755	379.441	0.851236	0.021719	397.127	0.648538	-0.0123214	364.414	0.831836	0.0164258	385.046	0.492024	0.0233329	378.715	0.770984	0.0290831	384.209	0.0981259	0.00980831
368.646	0.776853	0.0233786	379.385	0.748926	0.0296085	381.612	0.162723	0.0210968	377.604	0.660334	0.0232632	388.946	0.560056	-0.0107515	379.744	0.857585	0.0209185	397.425	0.64464	-0.0130831	364.707	0.836453	0.0157931	385.355	0.499137	0.0230272	379.003	0.77922	0.0285596	384.482	0.100938	0.0102769
368.946	0.783701	0.0228378	379.674	0.757378	0.0292009	381.899	0.168976	0.0217601	377.915	0.667313	0.0224757	389.249	0.556561	-0.0115311	380.048	0.863684	0.0200965	397.723	0.640518	-0.0138315	364.999	0.840881	0.0151522	385.663	0.50615	0.0227038	379.291	0.787299	0.0280125	384.756	0.10388	0.0107563
369.246	0.790382	0.0222775	379.963	0.765704	0.0287697	382.186	0.175422	0.0224306	378.225	0.67404	0.0216638	389.552	0.552837	-0.0122849	380.351	0.869528	0.0192542	398.021	0.636177	-0.0145659	365.291	0.845121	0.0145042	385.972	0.513058	0.0223634	379.58	0.795213	0.0274427	385.03	0.106957	0.0112462
369.545	0.796888	0.0216985	380.253	0.7739	0.0283153	382.474	0.182063	0.0231076	378.536	0.680508	0.020829	389.855	0.548893	-0.0130118	380.655	0.87511	0.0183924	398.319	0.631622	-0.0152857	365.584	0.849169	0.0138499	386.281	0.519855	0.0220064	379.868	0.802957	0.0268511	385.303	0.110171	0.0117464
369.845	0.803216	0.0211017	380.542	0.781957	0.0278384	382.761	0.188899	0.0237906	378.846	0.68671	0.019973	390.158	0.544737	-0.0137102	380.958	0.880425	0.0175122	398.617	0.626858	-0.01599	365.876	0.853025	0.0131904	386.59	0.526538	0.0216335	380.157	0.810524	0.0262387	385.577	0.113524	0.0122566
370.145	0.809359	0.020488	380.832	0.78987	0.0273396	383.048	0.195933	0.0244788	379.157	0.69264	0.0190975	390.461	0.540379	-0.0143791	381.262	0.885467	0.0166147	398.915	0.621888	-0.0166784	366.168	0.856686	0.0125265	386.899	0.5331	0.0212452	380.445	0.817909	0.0256065	385.85	0.11702	0.0127765
370.445	0.815314	0.0198583	381.121	0.797632	0.0268195	383.336	0.203167	0.0251715	379.467	0.698293	0.0182043	390.764	0.535827	-0.0150174	381.565	0.890233	0.0157008	399.213	0.616717	-0.0173501	366.461	0.860153	0.0118593	387.208	0.539538	0.0208421	380.733	0.825106	0.0249556	386.124	0.12066	0.0133058
370.745	0.821075	0.0192136	381.411	0.805238	0.0262788	383.623	0.2106	0.025868	379.778	0.703663	0.0172953	391.067	0.531091	-0.015624	381.869	0.894716	0.0147716	399.511	0.611352	-0.0180044	366.753	0.863423	0.0111896	387.517	0.545847	0.0204249	381.022	0.832111	0.0242869	386.398	0.124448	0.0138441
371.045	0.826639	0.0185549	381.7	0.812682	0.0257182	383.91	0.218235	0.0265674	380.088	0.708747	0.0163722	391.37	0.526181	-0.016198	382.172	0.898913	0.0138282	399.809	0.605797	-0.0186409	367.045	0.866498	0.0105184	387.826	0.552023	0.0199942	381.31	0.838917	0.0236015	386.671	0.128385	0.0143911
371.345	0.832001	0.0178831	381.989	0.819958	0.0251382	384.198	0.226071	0.0272689	380.399	0.713541	0.0154369	391.674	0.521108	-0.0167386	382.476	0.902819	0.0128715	400.107	0.600058	-0.0192589	367.337	0.869376	0.00984647	388.135	0.558063	0.0195507	381.599	0.845522	0.0229004	386.945	0.132474	0.0149463
371.644	0.837159	0.0171993	382.279	0.82706	0.0245397	384.485	0.234109	0.0279716	380.71	0.718041	0.0144915	391.977	0.51588	-0.0172449	382.779	0.906431	0.0119027	400.405	0.594141	-0.0198578	367.63	0.872057	0.0091747	388.443	0.563961	0.019095	381.887	0.85192	0.0221848	387.218	0.136717	0.0155093
371.944	0.842108	0.0165044	382.568	0.833984	0.0239233	384.773	0.242349	0.0286747	381.02	0.722244	0.0135377	392.28	0.51051	-0.0177163	383.083	0.909746	0.0109228	400.703	0.588051	-0.0204372	367.922	0.874543	0.00850391	388.752	0.569715	0.0186277	382.175	0.858108	0.0214558	387.492	0.141117	0.0160796
372.244	0.846845	0.0157994	382.858	0.840725	0.0232897	385.06	0.250791	0.0293772	381.331	0.72615	0.0125776	392.583	0.505008	-0.0181523	383.386	0.912761	0.0099329	401.001	0.581794	-0.0209966	368.214	0.876833	0.00783488	389.061	0.575321	0.0181496	382.464	0.864082	0.0207143	387.766	0.145674	0.0166568
372.544	0.851369	0.0150854	383.147	0.847278	0.0226396	385.347	0.259435	0.0300781	381.641	0.729756	0.0116131	392.886	0.499385	-0.0185523	383.69	0.915473	0.00893399	401.299	0.575377	-0.0215355	368.507	0.878928	0.00716835	389.37	0.580777	0.0176612	382.752	0.869838	0.0199614	388.039	0.15039	0.0172402
372.844	0.855676	0.0143632	383.437	0.853638	0.0219738	385.635	0.268279	0.0307766	381.952	0.733062	0.0106462	393.189	0.493651	-0.0189159	383.993	0.917878	0.00792712	401.597	0.568805	-0.0220535	368.799	0.88083	0.00650506	389.679	0.586078	0.0171633	383.041	0.875375	0.0191984	388.313	0.155268	0.0178295
373.144	0.859764	0.013634	383.726	0.8598	0.0212929	385.922	0.277323	0.0314715	382.262	0.736067	0.00967871	393.492	0.487818	-0.019243	384.297	0.919977	0.00691334	401.895	0.562085	-0.0225501	369.091	0.882539	0.00584566	389.988	0.591223	0.0166565	383.329	0.880689	0.0184261	388.586	0.160309	0.0184239
373.444	0.863632	0.0128987	384.015	0.865762	0.0205976	386.209	0.286565	0.0321618	382.573	0.738773	0.0087127	393.795	0.481898	-0.0195332	384.6	0.921765	0.00589367	402.193	0.555224	-0.023025	369.383	0.884056	0.00519079	390.297	0.596209	0.0161414	383.617	0.885778	0.0176456	388.86	0.165513	0.019023
373.743	0.867277	0.0121582	384.305	0.871518	0.0198887	386.497	0.296004	0.0328464	382.883	0.741179	0.00775004	394.098	0.4759	-0.0197866	384.904	0.923243	0.00486913	402.491	0.548228	-0.0234779	369.676	0.885383	0.00454104	390.606	0.601034	0.0156187	383.906	0.89064	0.016858	389.134	0.170883	0.019626
374.043	0.8707	0.0114134	384.594	0.877066	0.0191669	386.784	0.305637	0.0335243	383.194	0.743289	0.00679261	394.402	0.469837	-0.020003	385.207	0.924409	0.00384073	402.789	0.541103	-0.0239084	369.968	0.886522	0.00389696	390.915	0.605695	0.0150889	384.194	0.895273	0.0160644	389.407	0.176418	0.0202323
374.343	0.873898	0.0106654	384.884	0.882401	0.0184328	387.071	0.315464	0.0341944	383.504	0.745103	0.00584226	394.705	0.463719	-0.0201826	385.511	0.925261	0.00280946	403.087	0.533857	-0.0243163	370.26	0.887475	0.00325905	391.224	0.61019	0.0145528	384.483	0.899676	0.0152655	389.681	0.18212	0.0208412
374.643	0.876871	0.00991483	385.173	0.88752	0.0176871	387.359	0.32548	0.0348554	383.815	0.746625	0.0049008	395.008	0.457558	-0.0203257	385.814	0.9258	0.00177631	403.385	0.526496	-0.0247013	370.553	0.888243	0.00262775	391.532	0.614518	0.0140108	384.771	0.903846	0.0144626	389.954	0.187989	0.021452
374.943	0.879619	0.0091627	385.463	0.89242	0.0169306	387.646	0.335683	0.0355063	384.125	0.747857	0.00397001	395.311	0.451365	-0.0204323	386.118	0.926026	0.000742233	403.683	0.519028	-0.0250633	370.845	0.888828	0.00200348	391.841	0.618677	0.0134635	385.059	0.907785	0.0136564	390.228	0.194026	0.022064
375.243	0.88214	0.00840979	385.752	0.897099	0.0161638	387.934	0.34607	0.0361459	384.436	0.748805	0.00305158	395.614	0.44515	-0.0205031	386.421	0.925937	-0.000291801	403.981	0.511458	-0.0254019	371.137	0.889234	0.0013866	392.15	0.622665	0.0129115	385.348	0.91149	0.0128479	390.501	0.20023	0.0226765
375.543	0.884436	0.00765691	386.041	0.901552	0.0153874	388.221	0.356637	0.0367731	384.746	0.749472	0.00214718	395.917	0.438925	-0.0205383	386.725	0.925535	-0.00132486	404.279	0.503795	-0.0257172	371.43	0.889461	0.000777421	392.459	0.626481	0.0123554	385.636	0.914962	0.012038	390.775	0.206601	0.0232885
375.842	0.886507	0.0069048	386.331	0.905778	0.0146021	388.508	0.367381	0.0373865	385.057	0.749862	0.00125839	396.22	0.432699	-0.0205386	387.028	0.92482	-0.00235601	404.577	0.496044	-0.026009	371.722	0.889512	0.000176197	392.768	0.630125	0.0117955	385.925	0.9182	0.0112274	391.049	0.21314	0.0238994
376.142	0.888352	0.00615419	386.62	0.909775	0.0138084	388.796	0.378297	0.0379851	385.367	0.749983	0.000386739	396.523	0.426484	-0.0205047	387.332	0.923793	-0.00338435	404.875	0.488214	-0.0262773	372.014	0.889391	-0.000416852	393.077	0.633595	0.0112324	386.213	0.921204	0.0104171	391.322	0.219845	0.0245083
376.442	0.889973	0.00540574	386.91	0.91354	0.0130071	389.083	0.38938	0.0385676	385.678	0.749838	-0.000466333	396.827	0.420289	-0.0204371	387.635	0.922455	-0.00440899	405.173	0.480311	-0.0265219	372.306	0.889098	-0.00100156	393.386	0.63689	0.0106666	386.501	0.923975	0.00960781	391.596	0.226716	0.0251143
376.742	0.89137	0.00466011	387.199	0.91707	0.0121986	389.37	0.400625	0.0391328	385.988	0.749434	-0.00129946	397.13	0.414125	-0.0203368	387.939	0.920807	-0.00542904	405.471	0.472341	-0.0267428	372.599	0.888637	-0.0015778	393.695	0.640009	0.0100984	386.79	0.926513	0.00880021	391.869	0.233752	0.0257165
377.042	0.892545	0.00391788	387.489	0.920365	0.0113836	389.658	0.412027	0.0396794	386.299	0.748779	-0.00211135	397.433	0.408001	-0.0202045	388.242	0.918851	-0.00644365	405.769	0.464313	-0.0269403	372.891	0.88801	-0.0021455	394.004	0.642952	0.00952826	387.078	0.928819	0.00799502	392.143	0.240951	0.0263142
377.342	0.893499	0.00317962	387.778	0.923422	0.0105627	389.945	0.423581	0.0402064	386.609	0.747878	-0.00290081	397.736	0.401926	-0.0200413	388.546	0.91659	-0.00745197	406.067	0.456234	-0.0271141	373.183	0.887219	-0.00270462	394.312	0.645719	0.00895654	387.367	0.930893	0.00719289	392.417	0.248313	0.0269063
377.642	0.894232	0.00244583	388.067	0.92624	0.00973626	390.232	0.435281	0.0407125	386.92	0.746739	-0.00366675	398.039	0.39591	-0.0198481	388.849	0.914024	-0.00845317	406.365	0.448109	-0.0272646	373.476	0.886268	-0.00325519	394.621	0.648308	0.00838358	387.655	0.932737	0.00639443	392.69	0.255834	0.027492
377.941	0.894747	0.00171699	388.357	0.928818	0.00890499	390.52	0.447119	0.0411964	387.23	0.74537	-0.00440815	398.342	0.389961	-0.0196261	389.153	0.911157	-0.00944644	406.663	0.439946	-0.0273918	373.768	0.885158	-0.00379724	394.93	0.650721	0.0078097	387.943	0.934352	0.0056002	392.964	0.263514	0.0280703
378.241	0.895045	0.000993523	388.646	0.931153	0.00806935	390.807	0.45909	0.041657	387.541	0.743779	-0.0051241	398.645	0.384088	-0.0193764	389.456	0.907992	-0.010431	406.961	0.431753	-0.0274958	374.06	0.883892	-0.00433087	395.239	0.652956	0.00723517	388.232	0.93574	0.00481072	393.237	0.27135	0.0286403
378.541	0.895128	0.000275808	388.936	0.933246	0.00722985	391.095	0.471186	0.0420931	387.852	0.741974	-0.00581379	398.948	0.378298	-0.0191002	389.76	0.90453	-0.011406	407.259	0.423535	-0.0275769	374.352	0.882472	-0.00485621	395.548	0.655013	0.00666026	388.52	0.936901	0.00402647	393.511	0.279339	0.029201
378.841	0.894997	-0.000435812	389.225	0.935094	0.00638697	391.382	0.4834	0.0425036	388.162	0.739963	-0.00647651	399.251	0.3726	-0.0187986	390.063	0.900775	-0.0123707	407.557	0.4153	-0.0276353	374.645	0.880902	-0.00537343	395.857	0.656893	0.0060852	388.809	0.937838	0.0032479	393.785	0.287478	0.0297514
379.141	0.894655	-0.00114104	389.515	0.936698	0.0055412	391.669	0.495724	0.0428872	388.473	0.737755	-0.00711166	399.555	0.367001	-0.0184732	390.367	0.896731	-0.0133245	407.855	0.407054	-0.0276713	374.937	0.879182	-0.00588271	396.166	0.658595	0.0055102	389.097	0.938552	0.00247538	394.058	0.295766	0.0302906
379.441	0.894103	-0.00183961	389.804	0.938056	0.00469299	391.957	0.508151	0.0432429	388.783	0.735358	-0.00771874	399.858	0.361507	-0.0181251	390.67	0.892402	-0.0142664	408.153	0.398804	-0.0276852	375.229	0.877316	-0.00638429	396.475	0.660119	0.00493544	389.385	0.939045	0.00170929	394.332	0.304197	0.0308176
379.741	0.893344	-0.00253132	390.093	0.939169	0.00384279	392.244	0.520671	0.0435696	389.094	0.732781	-0.00829735	400.161	0.356125	-0.0177558	390.974	0.88779	-0.0151959	408.451	0.390557	-0.0276772	375.522	0.875306	-0.00687841	396.784	0.661466	0.00436108	389.674	0.939319	0.000949916	394.605	0.312769	0.0313313
380.04	0.89238	-0.00321598	390.383	0.940034	0.00299104	392.531	0.533277	0.0438662	389.404	0.730034	-0.00884722	400.464	0.350861	-0.0173667	391.277	0.8829	-0.0161122	408.749	0.382318	-0.0276477	375.814	0.873153	-0.00736536	397.093	0.662636	0.00378725	389.962	0.939376	0.000197541	394.879	0.321478	0.0318309
380.34	0.891212	-0.00389344	390.672	0.940653	0.00213817	392.819	0.545959	0.0441316	389.715	0.727125	-0.00936815	400.767	0.34572	-0.0169593	391.581	0.877736	-0.0170146	409.047	0.374094	-0.0275972	376.106	0.87086	-0.00784544	397.401	0.663629	0.00321408	390.251	0.939218	-0.000547607	395.152	0.330319	0.0323154
380.64	0.889844	-0.00456361	390.962	0.941025	0.0012846	393.106	0.558708	0.0443648	390.025	0.724063	-0.00986007	401.07	0.340708	-0.016535	391.884	0.872302	-0.0179025	409.345	0.365892	-0.0275259	376.399	0.868428	-0.00831896	397.71	0.664445	0.00264165	390.539	0.938847	-0.00128533	395.426	0.339288	0.0327836
380.94	0.888277	-0.00522641	391.251	0.94115	0.000430721	393.393	0.571514	0.0445649	390.336	0.720858	-0.010323	401.373	0.33583	-0.0160953	392.188	0.866604	-0.0187751	409.643	0.357717	-0.0274345	376.691	0.86586	-0.00878627	398.019	0.665084	0.00207004	390.827	0.938266	-0.00201548	395.7	0.348381	0.0332348
381.24	0.886513	-0.00588179	391.541	0.941027	-0.000423054	393.681	0.584368	0.0447308	390.646	0.717517	-0.0107571	401.676	0.331088	-0.0156418	392.491	0.860646	-0.0196319	409.941	0.349575	-0.0273232	376.983	0.863157	-0.0092477	398.328	0.665548	0.00149933	391.116	0.937476	-0.00273793	395.973	0.357592	0.0336679
381.54	0.884555	-0.00652974	391.83	0.940658	-0.00127633	393.968	0.59726	0.0448618	390.957	0.714051	-0.0111626	401.979	0.326488	-0.0151761	392.795	0.854433	-0.0204722	410.239	0.341471	-0.0271926	377.275	0.86032	-0.00970362	398.637	0.665835	0.000929565	391.404	0.93648	-0.00345259	396.247	0.366916	0.0340819
381.84	0.882405	-0.00717028	392.119	0.940042	-0.00212873	394.256	0.610179	0.0449569	391.267	0.710468	-0.0115398	402.283	0.322033	-0.0146995	393.098	0.84797	-0.0212953	410.537	0.333413	-0.0270432	377.568	0.857352	-0.0101544	398.946	0.665946	0.000360777	391.693	0.935281	-0.0041594	396.52	0.376349	0.034476
382.14	0.880065	-0.00780343	392.409	0.939179	-0.00297987	394.543	0.623115	0.0450153	391.578	0.706776	-0.0118891	402.586	0.317724	-0.0142138	393.402	0.841262	-0.0221008	410.835	0.325404	-0.0268755	377.86	0.854254	-0.0106004	399.255	0.665882	-0.000207001	391.981	0.93388	-0.00485832	396.794	0.385883	0.0348492
382.439	0.877537	-0.00842925	392.698	0.938071	-0.00382936	394.83	0.636056	0.0450363	391.888	0.702984	-0.0122111	402.889	0.313566	-0.0137203	393.705	0.834316	-0.022888	411.133	0.317451	-0.0266901	378.152	0.851026	-0.0110419	399.564	0.665643	-0.000773745	392.269	0.932279	-0.00554937	397.068	0.395514	0.0352005
382.739	0.874824	-0.00904783	392.988	0.936717	-0.00467683	395.118	0.648993	0.0450191	392.199	0.699101	-0.0125064	403.192	0.309558	-0.0132208	394.009	0.827136	-0.0236562	411.431	0.309558	-0.0264876	378.445	0.847671	-0.0114794	399.873	0.665229	-0.00133944	392.558	0.930482	-0.00623255	397.341	0.405234	0.0355292
383.039	0.871928	-0.00965924	393.277	0.935119	-0.00552189	395.405	0.661914	0.0449631	392.509	0.695134	-0.0127756	403.495	0.305704	-0.0127166	394.312	0.819729	-0.0244051	411.729	0.30173	-0.0262684	378.737	0.844189	-0.0119133	400.181	0.664641	-0.00190407	392.846	0.92849	-0.00690792	397.615	0.415038	0.0358343
383.339	0.86885	-0.0102636	393.567	0.933277	-0.00636418	395.692	0.674808	0.0448677	392.82	0.691091	-0.0130195	403.798	0.302003	-0.0122094	394.616	0.812101	-0.025134	412.027	0.293972	-0.0260333	379.029	0.840581	-0.0123437	400.49	0.663879	-0.00246761	393.135	0.926305	-0.00757552	397.888	0.424919	0.036115
383.639	0.865594	-0.010861	393.856	0.931192	-0.00720332	395.98	0.687662	0.0447323	393.13	0.68698	-0.013239	404.101	0.298456	-0.0117005	394.919	0.804258	-0.0258423	412.325	0.286289	-0.0257828	379.321	0.836848	-0.0127712	400.799	0.662943	-0.00303007	393.423	0.92393	-0.00823545	398.162	0.434869	0.0363705
383.939	0.86216	-0.0114516	394.145	0.928865	-0.00803891	396.267	0.700466	0.0445564	393.441	0.682808	-0.013435	404.404	0.295064	-0.0111916	395.223	0.796206	-0.0265297	412.623	0.278685	-0.0255176	379.614	0.832991	-0.013196	401.108	0.661834	-0.0035914	393.711	0.921366	-0.00888779	398.436	0.444883	0.0366
384.239	0.858551	-0.0120355	394.435	0.926298	-0.00887058	396.554	0.713208	0.0443396	393.751	0.678582	-0.0136085	404.707	0.291825	-0.010684	395.526	0.787953	-0.0271955	412.921	0.271164	-0.0252382	379.906	0.82901	-0.0136184	401.417	0.660551	-0.00415159	394	0.918617	-0.00953265	398.709	0.454951	0.0368028
384.538	0.854769	-0.0126128	394.724	0.923491	-0.00969794	396.842	0.725875	0.0440816	394.062	0.674309	-0.0137605	405.011	0.28874	-0.0101791	395.83	0.779504	-0.0278394	413.219	0.263731	-0.0249455	380.198	0.824907	-0.0140388	401.726	0.659096	-0.00471061	394.288	0.915684	-0.0101701	398.983	0.465068	0.0369781
384.838	0.850815	-0.0131837	395.014	0.920446	-0.0105206	397.129	0.738457	0.0437819	394.372	0.669995	-0.0138921	405.314	0.285806	-0.00967834	396.133	0.770866	-0.0284608	413.517	0.256388	-0.0246399	380.491	0.820681	-0.0144573	402.035	0.657469	-0.0052684	394.577	0.912569	-0.0108004	399.256	0.475225	0.0371254
385.138	0.846693	-0.0137482	395.303	0.917165	-0.0113381	397.417	0.75094	0.0434404	394.683	0.665647	-0.0140044	405.617	0.283023	-0.00918308	396.437	0.762046	-0.0290593	413.815	0.24914	-0.0243222	380.783	0.816333	-0.0148742	402.344	0.65567	-0.00582491	394.865	0.909275	-0.0114235	399.53	0.485415	0.0372439
385.438	0.842403	-0.0143065	395.593	0.913648	-0.0121502	397.704	0.763313	0.043057	394.994	0.661269	-0.0140987	405.92	0.280388	-0.0086946	396.74	0.753052	-0.0296346	414.113	0.241991	-0.0239931	381.075	0.811864	-0.0152897	402.653	0.653699	-0.00638006	395.153	0.905803	-0.0120397	399.804	0.495629	0.037333
385.738	0.837947	-0.0148587	395.882	0.909898	-0.0129562	397.991	0.775564	0.0426314	395.304	0.656867	-0.0141762	406.223	0.277898	-0.00821416	397.044	0.743891	-0.0301861	414.411	0.234942	-0.0236531	381.368	0.807274	-0.0157041	402.962	0.651557	-0.00693378	395.442	0.902155	-0.0126489	400.077	0.505859	0.0373923
386.038	0.833328	-0.0154049	396.172	0.905917	-0.013756	398.279	0.78768	0.0421637	395.615	0.652445	-0.0142381	406.526	0.275551	-0.00774299	397.347	0.734569	-0.0307135	414.709	0.227998	-0.0233031	381.66	0.802563	-0.0161175	403.27	0.649245	-0.00748596	395.73	0.898333	-0.0132514	400.351	0.516097	0.0374212
386.338	0.828547	-0.0159452	396.461	0.901706	-0.0145489	398.566	0.79965	0.0416539	395.925	0.648009	-0.0142858	406.829	0.273343	-0.00728224	397.651	0.725095	-0.0312165	415.007	0.221161	-0.0229437	381.952	0.797731	-0.0165299	403.579	0.646762	-0.00803646	396.018	0.89434	-0.0138473	400.624	0.526335	0.0374193
386.637	0.823605	-0.0164796	396.75	0.897267	-0.0153346	398.853	0.811461	0.0411021	396.236	0.643563	-0.0143204	407.132	0.271272	-0.00683303	397.954	0.715476	-0.0316947	415.305	0.214434	-0.0225755	382.244	0.792779	-0.0169416	403.888	0.64411	-0.00858515	396.307	0.890176	-0.0144367	400.898	0.536563	0.0373862
386.937	0.818505	-0.0170081	397.04	0.892604	-0.0161126	399.141	0.823102	0.0405085	396.546	0.639109	-0.0143434	407.435	0.269333	-0.00639642	398.258	0.705719	-0.0321479	415.603	0.207819	-0.0221993	382.537	0.787707	-0.0173524	404.197	0.64129	-0.00913186	396.595	0.885844	-0.0150196	401.171	0.546774	0.0373215
387.237	0.813249	-0.0175308	397.329	0.887718	-0.0168825	399.428	0.83456	0.0398733	396.857	0.634651	-0.014356	407.739	0.267523	-0.00597342	398.561	0.695833	-0.0325756	415.901	0.201318	-0.0218157	382.829	0.782515	-0.0177626	404.506	0.638301	-0.00967641	396.884	0.881346	-0.0155963	401.445	0.556958	0.0372249
387.537	0.807837	-0.0180477	397.619	0.882611	-0.0176438	399.716	0.845824	0.0391969	397.167	0.630192	-0.0143595	408.042	0.265836	-0.00556496	398.865	0.685824	-0.0329777	416.199	0.194933	-0.0214253	383.121	0.777204	-0.018172	404.815	0.635144	-0.0102186	397.172	0.876684	-0.0161666	401.719	0.567108	0.0370962
387.837	0.802272	-0.0185588	397.908	0.877287	-0.018396	400.003	0.856882	0.0384796	397.478	0.625734	-0.0143554	408.345	0.264268	-0.00517193	399.168	0.675701	-0.0333539	416.497	0.188667	-0.021029	383.414	0.771773	-0.0185806	405.124	0.631821	-0.0107581	397.46	0.871859	-0.0167307	401.992	0.577213	0.0369352
388.137	0.796555	-0.019064	398.198	0.871747	-0.0191386	400.29	0.867722	0.0377218	397.788	0.62128	-0.0143448	408.648	0.262815	-0.00479516	399.472	0.665472	-0.0337041	416.795	0.18252	-0.0206272	383.706	0.766222	-0.0189884	405.433	0.628332	-0.0112948	397.749	0.866873	-0.0172887	402.266	0.587265	0.0367417
388.437	0.790689	-0.0195633	398.487	0.865996	-0.0198711	400.578	0.878332	0.0369242	398.099	0.61683	-0.014329	408.951	0.26147	-0.0044354	399.775	0.655145	-0.034028	417.093	0.176494	-0.0202207	383.998	0.760553	-0.0193951	405.742	0.624678	-0.0118283	398.037	0.861728	-0.0178405	402.539	0.597255	0.0365158
388.736	0.784675	-0.0200565	398.776	0.860036	-0.020593	400.865	0.888703	0.0360873	398.409	0.612387	-0.0143093	409.254	0.26023	-0.00409334	400.079	0.644727	-0.0343254	417.391	0.170591	-0.0198101	384.291	0.754766	-0.0198008	406.05	0.620861	-0.0123584	398.326	0.856425	-0.0183862	402.813	0.607175	0.0362574
389.036	0.778515	-0.0205436	399.066	0.85387	-0.0213039	401.152	0.898821	0.0352117	398.72	0.607951	-0.014287	409.557	0.259087	-0.00376962	400.382	0.634227	-0.0345963	417.689	0.164811	-0.0193961	384.583	0.74886	-0.020205	406.359	0.616881	-0.0128846	398.614	0.850967	-0.0189258	403.087	0.617015	0.0359666
389.336	0.77221	-0.0210244	399.355	0.847501	-0.0220032	401.44	0.908677	0.0342983	399.03	0.603522	-0.0142632	409.86	0.258037	-0.0034648	400.686	0.623653	-0.0348406	417.987	0.159156	-0.0189792	384.875	0.742836	-0.0206077	406.668	0.61274	-0.0134067	398.902	0.845355	-0.0194591	403.36	0.626767	0.0356434
389.636	0.765764	-0.0214986	399.645	0.840934	-0.0226903	401.727	0.91826	0.0333478	399.341	0.5991	-0.014239	410.163	0.257073	-0.00317937	400.989	0.613013	-0.0350582	418.285	0.153625	-0.01856	385.167	0.736696	-0.0210086	406.977	0.608439	-0.0139242	399.191	0.839591	-0.0199861	403.634	0.636421	0.035288
389.936	0.759177	-0.0219662	399.934	0.834172	-0.0233648	402.014	0.92756	0.032361	399.651	0.594686	-0.0142156	410.467	0.25619	-0.00291377	401.293	0.602315	-0.0352491	418.583	0.14822	-0.0181393	385.46	0.730438	-0.0214073	407.286	0.603979	-0.0144368	399.479	0.833677	-0.0205068	403.907	0.64597	0.0349007
390.236	0.752452	-0.0224269	400.224	0.827218	-0.024026	402.302	0.936565	0.031339	399.962	0.590278	-0.014194	410.77	0.255381	-0.00266836	401.596	0.591567	-0.0354132	418.881	0.14294	-0.0177174	385.752	0.724065	-0.0218035	407.595	0.599363	-0.014944	399.768	0.827615	-0.021021	404.181	0.655403	0.0344818
390.536	0.745591	-0.0228804	400.513	0.820076	-0.0246736	402.589	0.945268	0.0302827	400.272	0.585877	-0.0141752	411.073	0.25464	-0.00244343	401.9	0.580778	-0.0355506	419.179	0.137786	-0.0172951	386.044	0.717577	-0.022197	407.904	0.594592	-0.0154454	400.056	0.821406	-0.0215287	404.455	0.664714	0.0340316
390.835	0.738597	-0.0233265	400.802	0.812752	-0.0253069	402.877	0.953657	0.0291931	400.583	0.58148	-0.0141602	411.376	0.253962	-0.00223921	402.203	0.569955	-0.0356615	419.477	0.132758	-0.0168728	386.337	0.710975	-0.0225872	408.213	0.589668	-0.0159405	400.344	0.815052	-0.0220295	404.728	0.673893	0.0335505
391.135	0.731471	-0.0237648	401.092	0.805248	-0.0259254	403.164	0.961723	0.0280714	400.893	0.577086	-0.0141499	411.679	0.253339	-0.00205587	402.507	0.559106	-0.0357458	419.775	0.127856	-0.016451	386.629	0.70426	-0.0229738	408.522	0.584593	-0.0164289	400.633	0.808557	-0.0225234	405.002	0.682932	0.0330391
391.435	0.724215	-0.024195	401.381	0.79757	-0.0265286	403.451	0.969459	0.0269188	401.204	0.572693	-0.0141451	411.982	0.252765	-0.0018935	402.81	0.54824	-0.0358037	420.073	0.123079	-0.0160304	386.921	0.697433	-0.0233563	408.831	0.57937	-0.0169099	400.921	0.801921	-0.0230101	405.275	0.691823	0.0324978
391.735	0.716834	-0.0246168	401.671	0.789722	-0.0271159	403.739	0.976855	0.0257364	401.514	0.568301	-0.0141465	412.285	0.252234	-0.00175215	403.114	0.537364	-0.0358354	420.371	0.118427	-0.0156113	387.213	0.690496	-0.0237343	409.139	0.574	-0.0173832	401.21	0.795146	-0.0234895	405.549	0.700558	0.0319273
392.035	0.709329	-0.0250297	401.96	0.781708	-0.0276868	404.026	0.983903	0.0245256	401.825	0.563905	-0.0141548	412.588	0.251739	-0.00163177	403.417	0.526486	-0.0358412	420.669	0.113899	-0.0151943	387.506	0.683449	-0.0241072	409.448	0.568487	-0.0178481	401.498	0.788236	-0.0239612	405.823	0.709129	0.0313281
392.335	0.701702	-0.0254335	402.25	0.773535	-0.0282408	404.313	0.990595	0.0232876	402.135	0.559505	-0.0141707	412.891	0.251274	-0.00153228	403.721	0.515614	-0.0358211	420.967	0.109495	-0.0147798	387.798	0.676295	-0.0244747	409.757	0.562833	-0.0183041	401.786	0.781192	-0.0244249	406.096	0.717529	0.0307011
392.635	0.693958	-0.0258276	402.539	0.765206	-0.0287774	404.601	0.996924	0.0220239	402.446	0.555097	-0.0141947	413.195	0.250834	-0.00145353	404.024	0.504757	-0.0357756	421.265	0.105213	-0.0143683	388.09	0.669036	-0.024836	410.066	0.557041	-0.0187507	402.075	0.774016	-0.0248805	406.37	0.725749	0.0300469
392.934	0.686098	-0.0262117	402.828	0.756726	-0.0292961	404.888	1.00288	0.0207359	402.757	0.550679	-0.0142273	413.498	0.250411	-0.0013953	404.328	0.49392	-0.035705	421.563	0.101053	-0.0139601	388.383	0.661673	-0.0251908	410.375	0.551114	-0.0191874	402.363	0.766712	-0.0253275	406.643	0.733784	0.0293664
393.234	0.678126	-0.0265853	403.118	0.748102	-0.0297963	405.175	1.00846	0.019425	403.067	0.546248	-0.0142688	413.801	0.25	-0.00135733	404.631	0.483113	-0.0356095	421.861	0.097014	-0.0135556	388.675	0.654208	-0.0255383	410.684	0.545056	-0.0196135	402.652	0.759281	-0.0257656	406.917	0.741625	0.0286604
393.534	0.670045	-0.026948	403.407	0.739339	-0.0302777	405.463	1.01366	0.0180928	403.378	0.541802	-0.0143196	414.104	0.249594	-0.00133929	404.935	0.472342	-0.0354895	422.159	0.0930938	-0.0131554	388.967	0.646644	-0.0258782	410.993	0.538869	-0.0200285	402.94	0.751727	-0.0261945	407.19	0.749266	0.0279299
393.834	0.661859	-0.0272993	403.697	0.730442	-0.0307396	405.75	1.01847	0.0167407	403.688	0.537337	-0.01438	414.407	0.249187	-0.00134081	405.238	0.461615	-0.0353455	422.457	0.0892916	-0.0127596	389.26	0.638983	-0.0262097	411.302	0.532558	-0.0204317	403.228	0.744052	-0.0266138	407.464	0.756701	0.0271758
394.134	0.653572	-0.0276387	403.986	0.721417	-0.0311818	406.038	1.02289	0.0153703	403.999	0.53285	-0.01445	414.71	0.248774	-0.00136146	405.542	0.450938	-0.0351779	422.755	0.0856058	-0.0123686	389.552	0.631228	-0.0265324	411.611	0.526126	-0.0208228	403.517	0.736258	-0.0270231	407.738	0.763924	0.0263992
394.434	0.645186	-0.0279658	404.276	0.71227	-0.0316037	406.325	1.02691	0.0139833	404.309	0.528338	-0.0145299	415.013	0.24835	-0.00140075	405.845	0.44032	-0.0349872	423.053	0.0820351	-0.0119828	389.844	0.623381	-0.0268456	411.919	0.519577	-0.021201	403.805	0.72835	-0.027422	408.011	0.770928	0.025601
394.734	0.636706	-0.0282801	404.565	0.703007	-0.032005	406.612	1.03052	0.0125812	404.62	0.523798	-0.0146196	415.316	0.247908	-0.00145817	406.149	0.429766	-0.0347739	423.351	0.0785777	-0.0116024	390.136	0.615446	-0.0271488	412.228	0.512915	-0.0215659	404.094	0.720329	-0.0278102	408.285	0.777708	0.0247824
395.033	0.628135	-0.0285812	404.854	0.693634	-0.0323852	406.9	1.03373	0.0111658	404.93	0.519227	-0.0147191	415.619	0.247443	-0.00153315	406.452	0.419284	-0.0345385	423.649	0.0752319	-0.0112277	390.429	0.607425	-0.0274414	412.537	0.506145	-0.0219169	404.382	0.7122	-0.0281871	408.558	0.784259	0.0239445
395.333	0.619479	-0.0288685	405.144	0.684157	-0.032744	407.187	1.03653	0.00973864	405.241	0.514623	-0.0148283	415.923	0.246951	-0.00162508	406.756	0.408879	-0.0342816	423.947	0.071996	-0.010859	390.721	0.599321	-0.0277227	412.846	0.499271	-0.0222535	404.67	0.703966	-0.0285524	408.832	0.790576	0.0230883
395.633	0.610741	-0.0291415	405.433	0.674582	-0.033081	407.474	1.03892	0.00830146	405.551	0.509982	-0.014947	416.226	0.246425	-0.0017333	407.059	0.398559	-0.0340038	424.245	0.0688681	-0.0104965	391.013	0.591139	-0.0279923	413.155	0.492298	-0.0225751	404.959	0.695629	-0.0289057	409.106	0.796654	0.0222153
395.933	0.601925	-0.0293999	405.723	0.664916	-0.033396	407.762	1.04089	0.00685595	405.862	0.5053	-0.0150749	416.529	0.245862	-0.00185714	407.363	0.38833	-0.0337057	424.543	0.0658464	-0.0101404	391.306	0.582882	-0.0282497	413.464	0.48523	-0.0228813	405.247	0.687195	-0.0292465	409.379	0.802489	0.0213264
396.233	0.593036	-0.0296432	406.012	0.655166	-0.0336886	408.049	1.04244	0.00540383	406.172	0.500577	-0.0152118	416.832	0.245257	-0.00199587	407.666	0.378196	-0.033388	424.841	0.0629288	-0.00979084	391.598	0.574553	-0.0284941	413.773	0.478073	-0.0231716	405.536	0.678666	-0.0295744	409.653	0.808076	0.0204231
396.533	0.584079	-0.029871	406.302	0.645337	-0.0339585	408.336	1.04357	0.00394682	406.483	0.495808	-0.0153572	417.135	0.244606	-0.00214875	407.97	0.368165	-0.0330513	425.139	0.0601134	-0.0094481	391.89	0.566157	-0.0287252	414.082	0.47083	-0.0234455	405.824	0.670046	-0.0298889	409.926	0.813413	0.0195065
396.833	0.575058	-0.0300827	406.591	0.635437	-0.0342056	408.624	1.04429	0.00248664	406.793	0.490992	-0.0155107	417.438	0.243904	-0.002315	408.273	0.358242	-0.0326963	425.437	0.057398	-0.00911229	392.182	0.557697	-0.0289424	414.391	0.463509	-0.0237026	406.112	0.661339	-0.0301897	410.2	0.818496	0.0185779
397.132	0.565979	-0.0302781	406.88	0.625472	-0.0344296	408.911	1.04458	0.00102502	407.104	0.486125	-0.0156718	417.741	0.243148	-0.00249381	408.577	0.348432	-0.0323238	425.735	0.0547806	-0.00878353	392.475	0.549178	-0.0291453	414.7	0.456113	-0.0239425	406.401	0.65255	-0.0304762	410.474	0.823321	0.0176386
397.432	0.556847	-0.0304568	407.17	0.615449	-0.0346304	409.199	1.04446	-0.00043633	407.414	0.481207	-0.01584	418.044	0.242335	-0.00268436	408.88	0.33874	-0.0319344	426.033	0.052259	-0.00846197	392.767	0.540604	-0.0293333	415.008	0.448649	-0.0241648	406.689	0.643682	-0.0307482	410.747	0.827888	0.01669
397.732	0.547665	-0.0306183	407.459	0.605374	-0.0348078	409.486	1.04391	-0.00189568	407.725	0.476234	-0.0160147	418.347	0.24146	-0.00288582	409.184	0.329171	-0.0315289	426.331	0.049831	-0.00814768	393.059	0.53198	-0.029506	415.317	0.441121	-0.0243692	406.978	0.63474	-0.0310052	411.021	0.832192	0.0157333
398.032	0.538441	-0.0307624	407.749	0.595255	-0.0349618	409.773	1.04295	-0.00335133	408.035	0.471205	-0.0161953	418.651	0.240521	-0.00309732	409.487	0.31973	-0.0311082	426.629	0.0474946	-0.00784075	393.352	0.52331	-0.0296631	415.626	0.433536	-0.0245553	407.266	0.625729	-0.0312468	411.294	0.836233	0.0147698
398.332	0.529179	-0.0308887	408.038	0.585098	-0.0350922	410.061	1.04157	-0.00480158	408.346	0.466118	-0.0163811	418.954	0.239515	-0.00331798	409.791	0.310421	-0.0306729	426.927	0.0452473	-0.00754126	393.644	0.514598	-0.0298041	415.935	0.4259	-0.0247228	407.554	0.616652	-0.0314726	411.568	0.840009	0.0138009
398.632	0.519884	-0.030997	408.328	0.574911	-0.0351991	410.348	1.03978	-0.00624475	408.656	0.460972	-0.0165713	419.257	0.23844	-0.00354694	410.094	0.301248	-0.0302239	427.225	0.0430871	-0.00724925	393.936	0.50585	-0.0299287	416.244	0.418217	-0.0248716	407.843	0.607515	-0.0316822	411.841	0.843518	0.0128279
398.932	0.510562	-0.031087	408.617	0.564699	-0.0352824	410.635	1.03757	-0.00767918	408.967	0.455766	-0.0167653	419.56	0.237294	-0.0037833	410.398	0.292215	-0.029762	427.523	0.0410117	-0.00696476	394.229	0.497071	-0.0300365	416.553	0.410494	-0.0250014	408.131	0.598322	-0.0318754	412.115	0.846761	0.0118521
399.231	0.501219	-0.0311585	408.906	0.55447	-0.0353421	410.923	1.03495	-0.00910323	409.277	0.450499	-0.0169623	419.863	0.236073	-0.00402616	410.701	0.283326	-0.029288	427.821	0.0390188	-0.00668781	394.521	0.488264	-0.0301272	416.862	0.402737	-0.025112	408.42	0.589079	-0.0320519	412.389	0.849736	0.0108747
399.531	0.49186	-0.0312113	409.196	0.54423	-0.0353784	411.21	1.03193	-0.0105153	409.588	0.44517	-0.0171615	420.166	0.234777	-0.00427464	411.005	0.274585	-0.0288028	428.119	0.0371061	-0.0064184	394.813	0.479437	-0.0302007	417.171	0.394952	-0.0252033	408.708	0.579789	-0.0322112	412.662	0.852444	0.00989715
399.831	0.482491	-0.0312453	409.485	0.533987	-0.0353914	411.497	1.02851	-0.0119137	409.899	0.439779	-0.017362	420.469	0.233405	-0.00452783	411.308	0.265994	-0.028307	428.417	0.0352715	-0.00615652	395.105	0.470593	-0.0302566	417.48	0.387145	-0.0252751	408.996	0.570458	-0.0323531	412.936	0.854885	0.00892063
400.131	0.473117	-0.0312603	409.775	0.523746	-0.0353812	411.785	1.02469	-0.0132971	410.209	0.434325	-0.0175631	420.772	0.231955	-0.00478486	411.612	0.257556	-0.0278017	428.715	0.0335128	-0.00590216	395.398	0.461738	-0.0302949	417.788	0.379321	-0.0253275	409.285	0.561092	-0.0324774	413.209	0.857059	0.00794639
400.431	0.463745	-0.0312562	410.064	0.513516	-0.035348	412.072	1.02047	-0.0146637	410.52	0.428809	-0.017764	421.075	0.230426	-0.00504484	411.915	0.249274	-0.0272876	429.013	0.0318275	-0.00565528	395.69	0.452877	-0.0303152	418.097	0.371487	-0.0253604	409.573	0.551695	-0.0325839	413.483	0.858967	0.00697566
400.731	0.454379	-0.031233	410.354	0.503301	-0.035292	412.36	1.01587	-0.0160122	410.83	0.423231	-0.0179636	421.379	0.228817	-0.00530689	412.219	0.241151	-0.0267655	429.311	0.0302136	-0.00541585	395.982	0.444015	-0.0303176	418.406	0.36365	-0.0253738	409.862	0.542272	-0.0326723	413.757	0.860611	0.00600965
401.031	0.445027	-0.0311907	410.643	0.493109	-0.0352135	412.647	1.01089	-0.017341	411.141	0.417592	-0.0181614	421.682	0.227129	-0.00557016	412.522	0.233188	-0.0262363	429.609	0.0286689	-0.00518379	396.275	0.435158	-0.0303019	418.715	0.355814	-0.0253678	410.15	0.532829	-0.0327424	414.03	0.861993	0.00504953
401.33	0.435692	-0.0311293	410.932	0.482947	-0.0351128	412.934	1.00553	-0.0186488	411.451	0.411892	-0.0183563	421.985	0.22536	-0.0058338	412.826	0.225388	-0.0257008	429.907	0.0271912	-0.00495905	396.567	0.426311	-0.0302681	419.024	0.347985	-0.0253425	410.438	0.523372	-0.0327942	414.304	0.863114	0.00409643
401.63	0.426382	-0.0310489	411.222	0.472819	-0.0349902	413.222	0.999802	-0.0199342	411.762	0.406132	-0.0185475	422.288	0.223512	-0.00609697	413.129	0.217752	-0.0251598	430.205	0.0257782	-0.00474155	396.859	0.417479	-0.0302162	419.333	0.340171	-0.0252979	410.727	0.513904	-0.0328275	414.577	0.863976	0.00315146
401.93	0.417102	-0.0309495	411.511	0.462734	-0.034846	413.509	0.993711	-0.0211959	412.072	0.400315	-0.0187343	422.591	0.221585	-0.00635888	413.433	0.210282	-0.0246142	430.503	0.024428	-0.00453121	397.151	0.408667	-0.0301462	419.642	0.332376	-0.0252344	411.015	0.504433	-0.0328423	414.851	0.864582	0.00221569
402.23	0.407856	-0.0308314	411.801	0.452696	-0.0346807	413.796	0.987264	-0.0224325	412.383	0.394441	-0.0189158	422.894	0.219579	-0.00661872	413.736	0.202978	-0.0240647	430.801	0.0231383	-0.00432794	397.444	0.399882	-0.0300582	419.951	0.324607	-0.0251521	411.304	0.494962	-0.0328384	415.125	0.864935	0.00129013
402.53	0.398652	-0.0306947	412.09	0.442712	-0.0344947	414.084	0.98047	-0.0236429	412.693	0.388513	-0.0190912	423.197	0.217494	-0.00687573	414.04	0.195843	-0.0235121	431.099	0.0219071	-0.00413162	397.736	0.391127	-0.0299524	420.26	0.316869	-0.0250512	411.592	0.485498	-0.0328159	415.398	0.865038	0.000375789
402.83	0.389495	-0.0305396	412.38	0.432788	-0.0342884	414.371	0.973336	-0.0248258	413.004	0.382532	-0.0192598	423.5	0.215334	-0.00712916	414.343	0.188875	-0.0229573	431.397	0.0207324	-0.00394216	398.028	0.382408	-0.0298288	420.568	0.309167	-0.0249322	411.88	0.476046	-0.0327748	415.672	0.864894	-0.000526406
403.13	0.380389	-0.0303664	412.669	0.422929	-0.0340624	414.658	0.96587	-0.0259801	413.314	0.376502	-0.0194207	423.803	0.213097	-0.00737831	414.646	0.182076	-0.0224009	431.694	0.0196121	-0.00375944	398.321	0.37373	-0.0296877	420.877	0.301508	-0.0247952	412.169	0.466611	-0.0327151	415.945	0.864506	-0.00141556
403.429	0.371341	-0.0301754	412.958	0.413142	-0.0338171	414.946	0.958081	-0.0271048	413.625	0.370424	-0.0195734	424.107	0.210787	-0.00762248	414.95	0.175447	-0.0218438	431.992	0.0185443	-0.00358334	398.613	0.365099	-0.0295292	421.186	0.293897	-0.0246406	412.457	0.457198	-0.0326369	416.219	0.86388	-0.00229082
403.729	0.362355	-0.0299668	413.248	0.40343	-0.0335531	415.233	0.949978	-0.0281987	413.935	0.364301	-0.0197169	424.41	0.208404	-0.00786101	415.253	0.168986	-0.0212866	432.29	0.017527	-0.00341374	398.905	0.356519	-0.0293537	421.495	0.286339	-0.0244689	412.746	0.447814	-0.0325404	416.493	0.863017	-0.00315139
404.029	0.353437	-0.0297411	413.537	0.393801	-0.0332709	415.521	0.941569	-0.029261	414.246	0.358137	-0.0198508	424.713	0.205951	-0.00809328	415.557	0.162695	-0.0207301	432.588	0.0165584	-0.0032505	399.198	0.347995	-0.0291614	421.804	0.278839	-0.0242805	413.034	0.438462	-0.0324257	416.766	0.861924	-0.00399653
404.329	0.344591	-0.0294987	413.827	0.384258	-0.0329712	415.808	0.932865	-0.0302908	414.556	0.351934	-0.0199744	425.016	0.203429	-0.00831869	415.86	0.156572	-0.020175	432.886	0.0156366	-0.00309348	399.49	0.339533	-0.0289527	422.113	0.271402	-0.0240758	413.322	0.429149	-0.0322929	417.04	0.860604	-0.00482554
404.629	0.335824	-0.0292399	414.116	0.374807	-0.0326546	416.095	0.923874	-0.0312871	414.867	0.345697	-0.0200871	425.319	0.200842	-0.00853667	416.164	0.150617	-0.0196219	433.184	0.0147597	-0.00294256	399.782	0.331136	-0.0287279	422.422	0.264033	-0.0238554	413.611	0.419879	-0.0321423	417.313	0.859061	-0.00563779
404.929	0.327138	-0.0289652	414.406	0.365452	-0.0323217	416.383	0.914607	-0.0322491	415.177	0.339428	-0.0201884	425.622	0.19819	-0.00874671	416.467	0.144829	-0.0190715	433.482	0.013926	-0.00279758	400.074	0.322809	-0.0284873	422.731	0.256737	-0.0236197	413.899	0.410658	-0.0319742	417.587	0.857301	-0.00643267
405.229	0.31854	-0.0286751	414.695	0.356198	-0.0319731	416.67	0.905073	-0.0331762	415.488	0.333131	-0.0202776	425.925	0.195478	-0.00894829	416.771	0.139206	-0.0185244	433.78	0.0131339	-0.00265841	400.367	0.314557	-0.0282314	423.04	0.249518	-0.0233693	414.188	0.40149	-0.0317887	417.86	0.855329	-0.00720967
405.528	0.310033	-0.0283701	414.985	0.347049	-0.0316096	416.957	0.895283	-0.0340676	415.798	0.326811	-0.0203545	426.228	0.192707	-0.00914098	417.074	0.133749	-0.0179813	434.078	0.0123815	-0.00252489	400.659	0.306384	-0.0279607	423.349	0.242381	-0.0231048	414.476	0.392381	-0.0315863	418.134	0.853149	-0.0079683
405.828	0.301621	-0.0280508	415.274	0.33801	-0.0312317	417.245	0.885248	-0.0349228	416.109	0.320471	-0.0204185	426.531	0.189881	-0.00932434	417.378	0.128455	-0.0174427	434.376	0.0116672	-0.00239689	400.951	0.298295	-0.0276756	423.657	0.23533	-0.0228267	414.764	0.383335	-0.0313672	418.408	0.850766	-0.00870815
406.128	0.29331	-0.0277176	415.563	0.329084	-0.0308403	417.532	0.874977	-0.0357411	416.419	0.314114	-0.0204692	426.835	0.187002	-0.009498	417.681	0.123323	-0.0169091	434.674	0.0109895	-0.00227424	401.244	0.290293	-0.0273766	423.966	0.228369	-0.0225357	415.053	0.374356	-0.0311319	418.681	0.848187	-0.00942884
406.428	0.285103	-0.0273713	415.853	0.320274	-0.0304361	417.82	0.864482	-0.0365221	416.73	0.307747	-0.0205065	427.138	0.184073	-0.0096616	417.985	0.118352	-0.0163811	434.972	0.0103468	-0.00215679	401.536	0.282382	-0.0270642	424.275	0.221502	-0.0222324	415.341	0.36545	-0.0308806	418.955	0.845415	-0.0101301
406.728	0.277003	-0.0270123	416.142	0.311586	-0.0300196	418.107	0.853773	-0.0372654	417.041	0.301372	-0.0205299	427.441	0.181098	-0.00981483	418.288	0.113539	-0.0158593	435.27	0.00973759	-0.00204441	401.828	0.274566	-0.026739	424.584	0.214731	-0.0219173	415.63	0.356621	-0.0306139	419.228	0.842457	-0.0108116
407.028	0.269014	-0.0266413	416.432	0.303021	-0.0295918	418.394	0.842862	-0.0379704	417.351	0.294994	-0.0205392	427.744	0.17808	-0.00995742	418.592	0.108882	-0.015344	435.568	0.0091604	-0.00193693	402.121	0.266849	-0.0264015	424.893	0.208062	-0.0215913	415.918	0.347874	-0.0303322	419.502	0.839318	-0.0114732
407.328	0.26114	-0.026259	416.721	0.294583	-0.0291533	418.682	0.831759	-0.0386371	417.662	0.288618	-0.0205342	428.047	0.175022	-0.0100891	418.895	0.104379	-0.0148357	435.866	0.00861382	-0.0018342	402.413	0.259234	-0.0260522	425.202	0.201496	-0.021255	416.206	0.339211	-0.030036	419.776	0.836004	-0.0121147
407.627	0.253384	-0.025866	417.011	0.286275	-0.0287049	418.969	0.820475	-0.039265	417.972	0.282247	-0.0205149	428.35	0.171927	-0.0102098	419.199	0.100029	-0.0143349	436.164	0.00809648	-0.00173608	402.705	0.251725	-0.0256918	425.511	0.195038	-0.0209089	416.495	0.330639	-0.0297257	420.049	0.83252	-0.012736
407.927	0.245749	-0.0254629	417.3	0.278099	-0.0282473	419.256	0.809023	-0.039854	418.283	0.275887	-0.0204811	428.653	0.1688	-0.0103192	419.502	0.0958276	-0.0138419	436.462	0.00760706	-0.00164241	402.997	0.244324	-0.0253209	425.82	0.188689	-0.0205539	416.783	0.322159	-0.0294018	420.323	0.828871	-0.0133371
408.227	0.238237	-0.0250505	417.589	0.270059	-0.0277812	419.544	0.797412	-0.040404	418.593	0.269543	-0.0204327	428.956	0.165642	-0.0104172	419.806	0.0917738	-0.0133572	436.76	0.00714426	-0.00155305	403.29	0.237034	-0.0249401	426.129	0.182452	-0.0201906	417.072	0.313777	-0.0290649	420.596	0.825063	-0.0139181
408.527	0.230852	-0.0246294	417.879	0.262155	-0.0273075	419.831	0.785654	-0.0409149	418.904	0.263217	-0.0203698	429.26	0.162458	-0.0105037	420.109	0.0878644	-0.012881	437.058	0.00670686	-0.00146785	403.582	0.229858	-0.0245499	426.437	0.17633	-0.0198197	417.36	0.305495	-0.0287156	420.87	0.821102	-0.0144788
408.827	0.223595	-0.0242002	418.168	0.254391	-0.0268268	420.118	0.773761	-0.0413866	419.214	0.256916	-0.0202923	429.563	0.159252	-0.0105788	420.413	0.0840969	-0.0124136	437.356	0.00629365	-0.00138665	403.874	0.222799	-0.0241511	426.746	0.170324	-0.0194419	417.648	0.297318	-0.0283544	421.144	0.816992	-0.0150195
409.127	0.216469	-0.0237638	418.458	0.246767	-0.0263399	420.406	0.761744	-0.0418193	419.525	0.250644	-0.0202005	429.866	0.156026	-0.0106423	420.716	0.0804685	-0.0119555	437.654	0.00590348	-0.00130933	404.167	0.215858	-0.0237443	427.055	0.164438	-0.0190579	417.937	0.289248	-0.0279819	421.417	0.812741	-0.0155404
409.427	0.209476	-0.0233207	418.747	0.239286	-0.0258475	420.693	0.749613	-0.042213	419.835	0.244404	-0.0200944	430.169	0.152784	-0.0106942	421.02	0.0769762	-0.0115067	437.952	0.00553524	-0.00123573	404.459	0.209039	-0.0233301	427.364	0.158671	-0.0186683	418.225	0.281289	-0.0275987	421.691	0.808352	-0.0160415
409.726	0.202618	-0.0228717	419.037	0.231949	-0.0253504	420.981	0.737381	-0.0425678	420.146	0.238201	-0.0199741	430.472	0.14953	-0.0107347	421.323	0.0736172	-0.0110676	438.25	0.00518786	-0.00116573	404.751	0.202343	-0.0229091	427.673	0.153026	-0.0182739	418.514	0.273443	-0.0272053	421.964	0.803831	-0.0165231
410.026	0.195896	-0.0224175	419.326	0.224757	-0.0248492	421.268	0.725058	-0.042884	420.456	0.232041	-0.01984	430.775	0.146268	-0.0107637	421.627	0.0703885	-0.0106383	438.548	0.00486032	-0.00109917	405.043	0.195771	-0.0224821	427.982	0.147505	-0.0178754	418.802	0.265713	-0.0268025	422.238	0.799184	-0.0169855
410.326	0.189312	-0.0219587	419.615	0.21771	-0.0243447	421.555	0.712654	-0.0431619	420.767	0.225926	-0.0196922	431.078	0.143	-0.0107815	421.93	0.0672871	-0.0102191	438.846	0.00455162	-0.00103593	405.336	0.189326	-0.0220496	428.291	0.142107	-0.0174733	419.09	0.258102	-0.0263907	422.512	0.794416	-0.017429
410.626	0.182866	-0.021496	419.905	0.210811	-0.0238376	421.843	0.700182	-0.0434017	421.077	0.219861	-0.0195311	431.381	0.13973	-0.010788	422.234	0.0643098	-0.00981005	439.144	0.00426082	-0.000975878	405.628	0.183009	-0.0216123	428.6	0.136835	-0.0170685	419.379	0.250612	-0.0259708	422.785	0.789531	-0.0178539
410.926	0.17656	-0.0210302	420.194	0.204059	-0.0233285	422.13	0.687652	-0.0436038	421.388	0.21385	-0.019357	431.684	0.136461	-0.0107835	422.537	0.0614534	-0.00941132	439.442	0.003987	-0.000918883	405.92	0.176821	-0.0211708	428.909	0.131688	-0.0166615	419.667	0.243245	-0.0255432	423.059	0.784535	-0.0182606
411.226	0.170394	-0.0205618	420.484	0.197455	-0.0228181	422.417	0.675075	-0.0437686	421.698	0.207897	-0.0191701	431.988	0.133197	-0.0107681	422.841	0.058715	-0.00902302	439.74	0.00372929	-0.00086482	406.213	0.170763	-0.0207258	429.218	0.126668	-0.0162529	419.956	0.236004	-0.0251086	423.332	0.779433	-0.0186496
411.526	0.164369	-0.0200915	420.773	0.190999	-0.022307	422.705	0.66246	-0.0438966	422.009	0.202007	-0.018971	432.291	0.129941	-0.0107421	423.144	0.0560912	-0.00864523	440.038	0.00348685	-0.000813567	406.505	0.164836	-0.0202778	429.526	0.121774	-0.0158434	420.244	0.22889	-0.0246677	423.606	0.774229	-0.0190212
411.826	0.158486	-0.01962	421.063	0.18469	-0.021796	422.992	0.649819	-0.0439883	422.319	0.196181	-0.01876	432.594	0.126696	-0.0107057	423.448	0.0535788	-0.008278	440.336	0.00325889	-0.000765004	406.797	0.159041	-0.0198276	429.835	0.117007	-0.0154336	420.532	0.221905	-0.0242211	423.879	0.768928	-0.0193759
412.125	0.152745	-0.0191479	421.352	0.178529	-0.0212855	423.279	0.637163	-0.0440443	422.63	0.190425	-0.0185375	432.897	0.123465	-0.0106591	423.751	0.0511747	-0.00792137	440.634	0.00304463	-0.000719014	407.09	0.153377	-0.0193756	430.144	0.112366	-0.0150241	420.821	0.21505	-0.0237694	424.153	0.763534	-0.0197141
412.425	0.147144	-0.0186758	421.641	0.172516	-0.0207762	423.567	0.6245	-0.0440651	422.94	0.184741	-0.0183041	433.2	0.120252	-0.0106026	424.055	0.0488756	-0.00757537	440.932	0.00284334	-0.000675487	407.382	0.147846	-0.0189226	430.453	0.107851	-0.0146154	421.109	0.208326	-0.0233133	424.427	0.758053	-0.0200365
412.725	0.141686	-0.0182043	421.931	0.16665	-0.0202687	423.854	0.611841	-0.0440513	423.251	0.179133	-0.0180602	433.503	0.117058	-0.0105365	424.358	0.0466783	-0.00723998	441.23	0.00265432	-0.000634311	407.674	0.142448	-0.018469	430.762	0.103462	-0.0142081	421.398	0.201735	-0.0228533	424.7	0.752487	-0.0203434
413.025	0.136368	-0.017734	422.22	0.16093	-0.0197635	424.142	0.599196	-0.0440037	423.561	0.173604	-0.0178064	433.806	0.113887	-0.0104612	424.662	0.0445796	-0.00691519	441.528	0.0024769	-0.00059538	407.966	0.137182	-0.0180155	431.071	0.0991987	-0.0138028	421.686	0.195278	-0.0223902	424.974	0.746841	-0.0206355
413.325	0.131191	-0.0172655	422.51	0.155355	-0.0192612	424.429	0.586574	-0.043923	423.872	0.168156	-0.0175431	434.109	0.110742	-0.0103769	424.965	0.0425762	-0.00660095	441.826	0.00231045	-0.000558592	408.259	0.132048	-0.0175626	431.38	0.0950596	-0.0133999	421.974	0.188955	-0.0219244	425.247	0.74112	-0.0209132
413.625	0.126153	-0.0167993	422.799	0.149924	-0.0187622	424.716	0.573985	-0.0438099	424.183	0.162793	-0.0172708	434.412	0.107624	-0.010284	425.269	0.040665	-0.0062972	442.124	0.00215434	-0.000523846	408.551	0.127047	-0.0171108	431.689	0.091044	-0.0129999	422.263	0.182767	-0.0214567	425.521	0.735326	-0.0211771
413.925	0.121255	-0.0163358	423.089	0.144637	-0.018267	425.004	0.561437	-0.0436651	424.493	0.157517	-0.0169903	434.716	0.104538	-0.0101828	425.572	0.0388429	-0.00600386	442.422	0.00200802	-0.000491047	408.843	0.122177	-0.0166607	431.998	0.0871509	-0.0126033	422.551	0.176714	-0.0209875	425.795	0.729463	-0.0214277
414.224	0.116495	-0.0158757	423.378	0.139492	-0.0177762	425.291	0.548939	-0.0434895	424.804	0.152331	-0.016702	435.019	0.101484	-0.0100737	425.876	0.0371066	-0.00572084	442.72	0.00187091	-0.000460102	409.136	0.117438	-0.0162127	432.306	0.0833791	-0.0122106	422.839	0.170797	-0.0205176	426.068	0.723536	-0.0216657
414.524	0.111871	-0.0154194	423.667	0.134488	-0.0172901	425.578	0.536501	-0.043284	425.114	0.147237	-0.0164064	435.322	0.0984662	-0.00995708	426.179	0.0354531	-0.00544804	443.018	0.0017425	-0.00043092	409.428	0.11283	-0.0157674	432.615	0.0797273	-0.0118222	423.128	0.165015	-0.0200474	426.342	0.717547	-0.0218915
414.824	0.107383	-0.0149674	423.957	0.129623	-0.0168092	425.866	0.52413	-0.0430494	425.425	0.142236	-0.0161043	435.625	0.0954856	-0.00983332	426.483	0.0338794	-0.00518533	443.316	0.00162229	-0.000403416	409.72	0.10835	-0.0153252	432.924	0.076194	-0.0114383	423.416	0.159369	-0.0195774	426.615	0.711499	-0.0221057
415.124	0.103029	-0.01452	424.246	0.124896	-0.0163339	426.153	0.511835	-0.0427865	425.735	0.137331	-0.0157961	435.928	0.0925446	-0.00970281	426.786	0.0323824	-0.00493257	443.614	0.00150979	-0.000377505	410.012	0.103999	-0.0148865	433.233	0.0727778	-0.0110596	423.705	0.153859	-0.0191083	426.889	0.705395	-0.0223089
415.424	0.0988074	-0.0140778	424.536	0.120304	-0.0158645	426.44	0.499623	-0.0424963	426.046	0.132523	-0.0154824	436.231	0.089645	-0.00956593	427.09	0.0309591	-0.00468962	443.912	0.00140457	-0.000353109	410.305	0.0997747	-0.0144519	433.542	0.0694769	-0.0106862	423.993	0.148483	-0.0186406	427.163	0.699239	-0.0225016
415.724	0.0947171	-0.0136411	424.825	0.115846	-0.0154013	426.728	0.487502	-0.0421798	426.356	0.127815	-0.0151639	436.534	0.0867888	-0.0094231	427.393	0.0296066	-0.00445631	444.21	0.00130619	-0.000330149	410.597	0.0956762	-0.0140216	433.851	0.0662896	-0.0103185	424.281	0.143241	-0.0181747	427.436	0.693033	-0.0226844
416.024	0.0907559	-0.0132102	425.115	0.111521	-0.0149448	427.015	0.475479	-0.0418379	426.667	0.123206	-0.0148411	436.837	0.0839775	-0.0092747	427.697	0.0283221	-0.00423248	444.508	0.00121424	-0.000308552	410.889	0.0917022	-0.0135961	434.16	0.063214	-0.00995682	424.57	0.138133	-0.0177111	427.71	0.686779	-0.0228577
416.323	0.086922	-0.0127855	425.404	0.107325	-0.0144952	427.303	0.463562	-0.0414715	426.977	0.118699	-0.0145146	437.14	0.0812128	-0.00912115	428	0.0271026	-0.00401794	444.806	0.00112835	-0.000288248	411.182	0.087851	-0.0131757	434.469	0.0602481	-0.00960143	424.858	0.133158	-0.0172503	427.983	0.68048	-0.0230221
416.623	0.0832136	-0.0123673	425.693	0.103258	-0.0140527	427.59	0.451756	-0.0410817	427.288	0.114294	-0.0141849	437.444	0.078496	-0.00896284	428.304	0.0259455	-0.00381252	445.104	0.00104814	-0.000269167	411.474	0.0841211	-0.0127608	434.778	0.0573901	-0.00925257	425.147	0.128315	-0.0167928	428.257	0.674139	-0.0231781
416.923	0.0796285	-0.011956	425.983	0.0993167	-0.0136177	427.877	0.440069	-0.0406694	427.598	0.109993	-0.0138528	437.747	0.0758286	-0.00880018	428.607	0.0248481	-0.003616	445.402	0.000973267	-0.000251246	411.766	0.0805107	-0.0123517	435.087	0.0546377	-0.00891048	425.435	0.123603	-0.016339	428.53	0.667757	-0.0233261
417.223	0.0761646	-0.0115517	426.272	0.0954991	-0.0131903	428.165	0.428507	-0.0402357	427.909	0.105795	-0.0135186	438.05	0.0732117	-0.00863357	428.911	0.0238077	-0.00342818	445.7	0.000903412	-0.000234421	412.059	0.0770182	-0.0119487	435.395	0.0519888	-0.00857537	425.723	0.119021	-0.0158892	428.804	0.661337	-0.0234666
417.523	0.0728198	-0.0111547	426.562	0.0918028	-0.0127708	428.452	0.417075	-0.0397816	428.219	0.101701	-0.013183	438.353	0.0706463	-0.00846339	429.214	0.0228216	-0.00324887	445.998	0.000838261	-0.000218633	412.351	0.0736416	-0.011552	435.704	0.0494412	-0.00824742	426.012	0.114567	-0.015444	429.078	0.65488	-0.0236
417.823	0.0695917	-0.0107653	426.851	0.0882257	-0.0123593	428.739	0.405779	-0.039308	428.53	0.0977122	-0.0128464	438.656	0.0681335	-0.00829005	429.518	0.0218875	-0.00307783	446.296	0.000777523	-0.000203825	412.643	0.070379	-0.011162	436.013	0.0469927	-0.00792678	426.3	0.11024	-0.0150036	429.351	0.648389	-0.0237269
418.123	0.0664781	-0.0103837	427.141	0.0847653	-0.011956	429.027	0.394625	-0.0388161	428.84	0.0938277	-0.0125095	438.959	0.065674	-0.00811393	429.821	0.0210029	-0.00291485	446.594	0.000720921	-0.000189943	412.935	0.0672284	-0.0107789	436.322	0.0446409	-0.0076136	426.589	0.106038	-0.0145684	429.625	0.641865	-0.0238475
418.422	0.0634765	-0.01001	427.43	0.0814191	-0.011561	429.314	0.383617	-0.0383068	429.151	0.0900478	-0.0121727	439.262	0.0632687	-0.0079354	430.125	0.0201653	-0.0027597	446.892	0.000668196	-0.000176936	413.228	0.0641877	-0.0104028	436.631	0.0423835	-0.00730801	426.877	0.101961	-0.0141387	429.898	0.635309	-0.0239622
418.722	0.0605846	-0.00964431	427.719	0.0781849	-0.0111745	429.601	0.37276	-0.0377812	429.461	0.0863723	-0.0118366	439.565	0.0609181	-0.00775484	430.428	0.0193725	-0.00261216	447.19	0.000619101	-0.000164752	413.52	0.0612548	-0.010034	436.94	0.0402181	-0.00701008	427.165	0.0980053	-0.0137148	430.172	0.628723	-0.0240714
419.022	0.0577998	-0.00928688	428.009	0.07506	-0.0107966	429.889	0.362058	-0.0372403	429.772	0.0828008	-0.0115015	439.868	0.0586228	-0.00757262	430.732	0.0186223	-0.002472	447.488	0.000573405	-0.000153347	413.812	0.0584275	-0.00967269	437.249	0.0381423	-0.00671992	427.454	0.0941705	-0.0132971	430.446	0.622109	-0.0241755
419.322	0.0551197	-0.00893777	428.298	0.0720421	-0.0104272	430.176	0.351516	-0.0366852	430.082	0.0793329	-0.011168	440.172	0.0563831	-0.00738908	431.035	0.0179124	-0.00233898	447.786	0.00053089	-0.000142674	414.105	0.0557036	-0.00931894	437.558	0.0361538	-0.00643756	427.742	0.0904542	-0.0128858	430.719	0.615468	-0.0242746
419.622	0.0525418	-0.00859708	428.588	0.0691285	-0.0100666	430.464	0.341138	-0.0361168	430.393	0.075968	-0.0108365	440.475	0.0541993	-0.00720457	431.339	0.0172408	-0.00221287	448.084	0.000491349	-0.000132692	414.397	0.0530809	-0.00897293	437.867	0.0342501	-0.00616306	428.031	0.0868547	-0.0124811	430.993	0.6088	-0.0243691
419.922	0.0500635	-0.00826489	428.877	0.0663167	-0.00971474	430.751	0.330926	-0.0355362	430.703	0.0727052	-0.0105074	440.778	0.0520716	-0.00701942	431.642	0.0166055	-0.00209343	448.382	0.000454589	-0.000123359	414.689	0.050557	-0.00863477	438.175	0.0324287	-0.00589643	428.319	0.0833699	-0.0120833	431.266	0.602109	-0.0244593
420.222	0.0476823	-0.00794124	429.167	0.0636043	-0.00937162	431.038	0.320884	-0.0349443	431.014	0.0695437	-0.0101811	441.081	0.0500002	-0.00683396	431.946	0.0160044	-0.00198043	448.68	0.000420427	-0.000114638	414.981	0.0481296	-0.00830455	438.484	0.0306873	-0.00563768	428.607	0.0799978	-0.0116925	431.54	0.595393	-0.0245452
420.521	0.0453955	-0.00762616	429.456	0.0609887	-0.00903727	431.326	0.311015	-0.0343423	431.325	0.0664826	-0.00985808	441.384	0.0479849	-0.00664851	432.249	0.0154358	-0.00187365	448.978	0.000388694	-0.000106492	415.274	0.0457964	-0.00798235	438.793	0.0290233	-0.0053868	428.896	0.0767363	-0.011309	431.814	0.588656	-0.0246272
420.821	0.0432006	-0.00731969	429.745	0.0584672	-0.00871168	431.613	0.301322	-0.033731	431.635	0.0635207	-0.0095386	441.687	0.0460258	-0.00646335	432.553	0.0148977	-0.00177283	449.276	0.000359227	-9.88861e-05	415.566	0.043555	-0.00766823	439.102	0.0274344	-0.00514376	429.184	0.0735833	-0.0109329	432.087	0.581896	-0.0247054
421.121	0.0410951	-0.0070218	430.035	0.0560375	-0.00839482	431.9	0.291807	-0.0331115	431.946	0.0606567	-0.00922303	441.99	0.0441226	-0.00627878	432.856	0.0143885	-0.00167776	449.574	0.000331874	-9.17881e-05	415.858	0.0414031	-0.00736224	439.411	0.0259182	-0.00490852	429.473	0.0705366	-0.0105643	432.361	0.575117	-0.0247799
421.421	0.0390763	-0.0067325	430.324	0.053697	-0.00808667	432.188	0.282472	-0.0324846	432.256	0.0578894	-0.0089117	442.293	0.0422751	-0.00609507	433.16	0.0139065	-0.0015882	449.872	0.000306495	-8.51667e-05	416.151	0.0393382	-0.0070644	439.72	0.0244723	-0.00468103	429.761	0.0675939	-0.0102034	432.634	0.568318	-0.0248508
421.721	0.0371417	-0.00645175	430.614	0.0514431	-0.00778716	432.475	0.273319	-0.0318514	432.567	0.0552174	-0.0086049	442.596	0.040483	-0.00591248	433.463	0.0134501	-0.00150393	450.17	0.000282956	-7.89927e-05	416.443	0.037358	-0.00677472	440.029	0.0230942	-0.00446122	430.049	0.0647531	-0.00985037	432.908	0.5615	-0.0249183
422.021	0.0352887	-0.0061795	430.903	0.0492735	-0.00749624	432.762	0.26435	-0.0312128	432.877	0.0526392	-0.00830291	442.9	0.0387458	-0.00573127	433.767	0.0130177	-0.00142472	450.468	0.000261132	-7.32382e-05	416.735	0.03546	-0.00649319	440.338	0.0217817	-0.00424901	430.338	0.0620118	-0.00950518	433.182	0.554666	-0.0249823
422.321	0.0335148	-0.00591569	431.193	0.0471856	-0.00721382	433.05	0.255565	-0.0305696	433.188	0.0501532	-0.00800599	443.203	0.037063	-0.00555167	434.07	0.0126078	-0.00135034	450.766	0.000240905	-6.7877e-05	417.028	0.033642	-0.00621981	440.647	0.0205325	-0.0040443	430.626	0.0593678	-0.00916795	433.455	0.547814	-0.0250429
422.62	0.0318176	-0.00566025	431.482	0.045177	-0.00693983	433.337	0.246966	-0.0299228	433.498	0.0477577	-0.00771438	443.506	0.0354341	-0.0053739	434.374	0.0122192	-0.0012806	451.064	0.000222166	-6.28844e-05	417.32	0.0319015	-0.00595454	440.956	0.0193442	-0.003847	430.915	0.0568188	-0.00883873	433.729	0.540947	-0.0251001
422.92	0.0301944	-0.0054131	431.771	0.0432453	-0.00667416	433.625	0.238554	-0.0292732	433.809	0.045451	-0.00742828	443.809	0.0338585	-0.00519816	434.677	0.0118504	-0.00121526	451.362	0.000204812	-5.8237e-05	417.612	0.0302362	-0.00569733	441.264	0.0182145	-0.00365699	431.203	0.0543623	-0.00851756	434.002	0.534065	-0.0251539
423.22	0.0286429	-0.00517414	432.061	0.0413881	-0.0064167	433.912	0.230329	-0.0286216	434.119	0.0432315	-0.00714789	444.112	0.0323354	-0.00502467	434.981	0.0115001	-0.00115412	451.66	0.000188747	-5.39128e-05	417.904	0.0286438	-0.00544813	441.573	0.0171414	-0.00347416	431.491	0.0519962	-0.00820448	434.276	0.527169	-0.0252042
423.52	0.0271606	-0.00494326	432.35	0.0396031	-0.00616734	434.199	0.222292	-0.027969	434.43	0.0410971	-0.00687339	444.415	0.0308642	-0.00485358	435.284	0.0111672	-0.00109698	451.958	0.000173879	-4.98908e-05	418.197	0.0271218	-0.00520687	441.882	0.0161225	-0.00329837	431.78	0.049718	-0.00789948	434.549	0.520261	-0.0252511
423.82	0.0257452	-0.00472035	432.64	0.0378879	-0.00592596	434.487	0.214442	-0.027316	434.74	0.0390462	-0.00660492	444.718	0.0294441	-0.00468509	435.588	0.0108504	-0.00104363	452.256	0.000160127	-4.61516e-05	418.489	0.0256681	-0.00497347	442.191	0.0151559	-0.0031295	432.068	0.0475254	-0.00760256	434.823	0.513341	-0.0252943
424.12	0.0243942	-0.00450529	432.929	0.0362404	-0.00569242	434.774	0.20678	-0.0266635	435.051	0.0370766	-0.00634263	445.021	0.0280743	-0.00451933	435.891	0.0105488	-0.000993883	452.554	0.000147409	-4.26767e-05	418.781	0.0242803	-0.00474784	442.5	0.0142392	-0.00296739	432.357	0.0454161	-0.00731371	435.097	0.50641	-0.0253338
424.42	0.0231054	-0.00429793	433.219	0.0346582	-0.00546659	435.061	0.199305	-0.0260122	435.361	0.0351866	-0.00608663	445.324	0.0267538	-0.00435646	436.195	0.0102612	-0.000947541	452.852	0.000135654	-3.94487e-05	419.074	0.0229563	-0.00452988	442.809	0.0133707	-0.0028119	432.645	0.0433879	-0.0070329	435.37	0.499469	-0.0253696
424.719	0.0218766	-0.00409815	433.508	0.0331391	-0.00524831	435.349	0.192017	-0.0253629	435.672	0.0333741	-0.00583701	445.628	0.0254817	-0.00419659	436.498	0.00998671	-0.000904422	453.15	0.000124792	-3.64513e-05	419.366	0.0216937	-0.00431948	443.118	0.0125481	-0.00266288	432.933	0.0414383	-0.00676007	435.644	0.492519	-0.0254013
425.019	0.0207054	-0.00390579	433.797	0.0316811	-0.00503744	435.636	0.184914	-0.0247161	435.982	0.0316371	-0.00559385	445.931	0.0242572	-0.00403986	436.802	0.00972438	-0.000864345	453.448	0.000114759	-3.36692e-05	419.658	0.0204905	-0.00411653	443.427	0.0117696	-0.00252018	433.222	0.0395651	-0.00649519	435.917	0.485562	-0.025429
425.319	0.0195897	-0.00372069	434.087	0.0302821	-0.00483383	435.923	0.177997	-0.0240727	436.293	0.0299735	-0.00535722	446.234	0.0230792	-0.00388636	437.105	0.00947335	-0.000827135	453.746	0.000105495	-3.10878e-05	419.95	0.0193444	-0.0039209	443.736	0.0110334	-0.00238362	433.51	0.037766	-0.00623817	436.191	0.478599	-0.0254525
425.619	0.0185274	-0.00354272	434.376	0.0289399	-0.00463732	436.211	0.171263	-0.0234332	436.603	0.0283815	-0.00512715	446.537	0.0219467	-0.00373618	437.409	0.00923279	-0.000792623	454.044	9.69443e-05	-2.86938e-05	420.243	0.0182534	-0.00373247	444.044	0.0103374	-0.00225305	433.799	0.0360388	-0.00598894	436.465	0.47163	-0.0254715
425.919	0.0175164	-0.00337169	434.666	0.0276526	-0.00444774	436.498	0.164711	-0.0227983	436.914	0.0268588	-0.00490368	446.84	0.0208587	-0.00358941	437.712	0.00900194	-0.000760646	454.342	8.90552e-05	-2.64743e-05	420.535	0.0172155	-0.00355109	444.353	0.00967999	-0.00212829	434.087	0.0343813	-0.00574742	436.738	0.464657	-0.0254859
426.219	0.0165546	-0.00320745	434.955	0.0264182	-0.00426493	436.786	0.158341	-0.0221684	437.224	0.0254034	-0.00468682	447.143	0.0198142	-0.00344611	438.016	0.00878007	-0.000731046	454.64	8.1779e-05	-2.44175e-05	420.827	0.0162285	-0.00337664	444.662	0.00905936	-0.00200919	434.375	0.0327912	-0.00551351	437.012	0.457682	-0.0254955
426.519	0.0156401	-0.00304982	435.245	0.0252348	-0.00408872	437.073	0.15215	-0.0215443	437.535	0.0240133	-0.00447657	447.446	0.018812	-0.00330635	438.319	0.00856651	-0.00070367	454.938	7.50705e-05	-2.25122e-05	421.12	0.0152905	-0.00320895	444.971	0.00847383	-0.00189557	434.664	0.0312664	-0.00528711	437.285	0.450705	-0.0255001
426.818	0.0147709	-0.00289864	435.534	0.0241005	-0.00391895	437.36	0.146136	-0.0209265	437.845	0.0226865	-0.00427291	447.749	0.0178511	-0.00317017	438.623	0.00836062	-0.000678372	455.236	6.88878e-05	-2.0748e-05	421.412	0.0143997	-0.00304788	445.28	0.00792176	-0.00178726	434.952	0.0298048	-0.00506811	437.559	0.443729	-0.0254995
427.118	0.0139452	-0.00275372	435.824	0.0230136	-0.00375545	437.648	0.140298	-0.0203153	438.156	0.0214209	-0.0040758	448.052	0.0169303	-0.0030376	438.926	0.00816183	-0.000655011	455.534	6.31917e-05	-1.91149e-05	421.704	0.013554	-0.00289328	445.589	0.00740155	-0.0016841	435.241	0.0284042	-0.00485639	437.833	0.436754	-0.0254935
427.418	0.0131611	-0.00261491	436.113	0.0219722	-0.00359803	437.935	0.134634	-0.0197114	438.467	0.0202144	-0.00388522	448.356	0.0160487	-0.00290868	439.23	0.00796958	-0.000633452	455.832	5.79459e-05	-1.7604e-05	421.997	0.0127516	-0.00274498	445.898	0.00691167	-0.0015859	435.529	0.0270626	-0.00465183	438.106	0.429783	-0.0254819
427.718	0.0124168	-0.00248201	436.402	0.0209747	-0.00344654	438.222	0.129141	-0.0191151	438.777	0.0190652	-0.00370111	448.659	0.015205	-0.00278343	439.533	0.00778336	-0.000613566	456.13	5.31165e-05	-1.62065e-05	422.289	0.0119908	-0.00260283	446.207	0.00645065	-0.0014925	435.817	0.025778	-0.00445429	438.38	0.422816	-0.0254644
428.018	0.0117107	-0.00235485	436.692	0.0200193	-0.00330081	438.51	0.123817	-0.0185269	439.088	0.0179711	-0.0035234	448.962	0.0143982	-0.00266184	439.837	0.00760271	-0.000595228	456.428	4.86721e-05	-1.49144e-05	422.581	0.0112698	-0.00246667	446.516	0.00601704	-0.00140374	436.106	0.0245484	-0.00426364	438.653	0.415855	-0.0254409
428.318	0.011041	-0.00223326	436.981	0.0191045	-0.00316066	438.797	0.11866	-0.0179472	439.398	0.0169302	-0.00335202	449.265	0.0136271	-0.00254393	440.14	0.00742719	-0.000578321	456.726	4.45835e-05	-1.37204e-05	422.873	0.0105869	-0.00233633	446.825	0.00560947	-0.00131944	436.394	0.0233718	-0.00407975	438.927	0.408903	-0.0254112
428.618	0.0104062	-0.00211705	437.271	0.0182287	-0.00302592	439.085	0.113666	-0.0173762	439.709	0.0159406	-0.00318689	449.568	0.0128906	-0.00242969	440.444	0.0072564	-0.000562732	457.024	4.08237e-05	-1.26172e-05	423.166	0.00994048	-0.00221165	447.133	0.00522662	-0.00123943	436.683	0.0222463	-0.00390246	439.2	0.401961	-0.025375
428.917	0.00980468	-0.00200606	437.56	0.0173904	-0.00289643	439.372	0.108834	-0.0168145	440.019	0.0150004	-0.00302791	449.871	0.0121876	-0.0023191	440.747	0.00708998	-0.000548354	457.322	3.73674e-05	-1.15985e-05	423.458	0.00932886	-0.00209245	447.442	0.0048672	-0.00116356	436.971	0.0211701	-0.00373163	439.474	0.39503	-0.0253321
429.217	0.00923492	-0.00190011	437.85	0.0165881	-0.00277201	439.659	0.104161	-0.0162621	440.33	0.0141076	-0.00287499	450.174	0.0115171	-0.00221214	441.051	0.00692758	-0.000535086	457.62	3.41914e-05	-1.06582e-05	423.75	0.00875053	-0.00197859	447.751	0.00453	-0.00109166	437.259	0.0201414	-0.00356712	439.748	0.388113	-0.0252824
429.517	0.00869546	-0.00179903	438.139	0.0158204	-0.00265252	439.947	0.099644	-0.0157196	440.64	0.0132605	-0.00272801	450.477	0.0108779	-0.00210878	441.354	0.00676891	-0.00052283	457.918	3.12739e-05	-9.79043e-06	424.043	0.00820398	-0.00186988	448.06	0.00421382	-0.00102358	437.548	0.0191583	-0.00340876	440.021	0.381212	-0.0252257
429.817	0.00818491	-0.00170264	438.428	0.0150859	-0.00253778	440.234	0.0952798	-0.015187	440.951	0.0124572	-0.00258687	450.78	0.010269	-0.00200899	441.658	0.00661367	-0.000511496	458.216	2.8595e-05	-8.99002e-06	424.335	0.00768773	-0.00176616	448.369	0.00391754	-0.000959154	437.836	0.0182192	-0.00325641	440.295	0.374328	-0.0251617
430.117	0.0077019	-0.00161078	438.718	0.0143832	-0.00242763	440.521	0.0910657	-0.0146646	441.261	0.011696	-0.00245144	451.084	0.0096892	-0.00191272	441.961	0.00646162	-0.000500997	458.514	2.6136e-05	-8.252e-06	424.627	0.0072004	-0.00166728	448.678	0.00364008	-0.000898234	438.125	0.0173223	-0.00310991	440.568	0.367463	-0.0250904
430.417	0.00724513	-0.00152328	439.007	0.0137112	-0.00232192	440.809	0.0869987	-0.0141527	441.572	0.0109751	-0.00232159	451.387	0.00913755	-0.00181993	442.265	0.00631252	-0.000491252	458.812	2.38796e-05	-7.57176e-06	424.92	0.0067406	-0.00157306	448.987	0.0033804	-0.000840669	438.413	0.016466	-0.00296911	440.842	0.36062	-0.0250115
430.717	0.00681334	-0.00143998	439.297	0.0130685	-0.00222049	441.096	0.0830758	-0.0136514	441.882	0.0102928	-0.00219721	451.69	0.00861299	-0.00173058	442.568	0.00616618	-0.000482186	459.11	2.18101e-05	-6.94502e-06	425.212	0.00630702	-0.00148335	449.296	0.00313752	-0.000786312	438.701	0.0156487	-0.00283384	441.116	0.353801	-0.024925
431.016	0.00640532	-0.00136072	439.586	0.012454	-0.00212319	441.383	0.0792938	-0.0131608	442.193	0.00964751	-0.00207815	451.993	0.0081145	-0.00164459	442.872	0.00602241	-0.000473725	459.408	1.99125e-05	-6.36779e-06	425.504	0.0058984	-0.00139799	449.605	0.00291047	-0.000735023	438.99	0.0148689	-0.00270395	441.389	0.347008	-0.0248307
431.316	0.0060199	-0.00128534	439.876	0.0118665	-0.00202988	441.671	0.0756497	-0.0126812	442.503	0.00903756	-0.00196428	452.296	0.00764106	-0.00156192	443.175	0.00588104	-0.000465803	459.706	1.81734e-05	-5.83636e-06	425.796	0.0055135	-0.00131681	449.913	0.00269837	-0.000686661	439.278	0.014125	-0.00257928	441.663	0.340242	-0.0247285
431.616	0.00565597	-0.00121368	440.165	0.0113049	-0.00194041	441.958	0.0721402	-0.0122125	442.814	0.0084614	-0.00185546	452.599	0.0071917	-0.0014825	443.479	0.00574193	-0.000458358	460.004	1.65799e-05	-5.34729e-06	426.089	0.00515115	-0.00123966	450.222	0.00250034	-0.000641091	439.567	0.0134157	-0.00245967	441.936	0.333507	-0.0246182
431.916	0.00531245	-0.0011456	440.454	0.0107681	-0.00185464	442.246	0.0687623	-0.0117549	443.124	0.00791751	-0.00175155	452.902	0.00676544	-0.00140626	443.782	0.00560495	-0.00045133	460.302	1.51205e-05	-4.89737e-06	426.381	0.00481022	-0.00116639	450.531	0.00231556	-0.000598183	439.855	0.0127394	-0.00234498	442.21	0.326804	-0.0244999
432.216	0.00498832	-0.00108095	440.744	0.0102551	-0.00177243	442.533	0.0655126	-0.0113085	443.435	0.0074044	-0.0016524	453.205	0.00636135	-0.00133314	444.086	0.00547	-0.000444666	460.6	1.37845e-05	-4.48362e-06	426.673	0.00448962	-0.00109685	450.84	0.00214326	-0.000557808	440.143	0.0120948	-0.00223504	442.484	0.320136	-0.0243734
432.516	0.00468259	-0.00101958	441.033	0.00976491	-0.00169364	442.82	0.062388	-0.0108733	443.745	0.00692065	-0.00155787	453.508	0.0059785	-0.00126306	444.389	0.00533697	-0.000438316	460.898	1.25617e-05	-4.10328e-06	426.966	0.00418829	-0.00103089	451.149	0.00198268	-0.000519844	440.432	0.0114806	-0.0021297	442.757	0.313504	-0.0242386
432.816	0.00439431	-0.000961365	441.323	0.00929657	-0.00161815	443.108	0.0593852	-0.0104493	444.056	0.00646487	-0.00146781	453.812	0.005616	-0.00119595	444.693	0.00520579	-0.000432234	461.196	1.14431e-05	-3.7538e-06	427.258	0.00390525	-0.000968365	451.458	0.00183312	-0.000484171	440.72	0.0108955	-0.00202881	443.031	0.306912	-0.0240956
433.115	0.00412259	-0.000906155	441.612	0.00884916	-0.00154583	443.395	0.0565011	-0.0100365	444.366	0.0060357	-0.00138208	454.115	0.00527295	-0.00113174	444.996	0.00507638	-0.000426376	461.494	1.04202e-05	-3.43278e-06	427.55	0.00363951	-0.000909135	451.767	0.00169391	-0.000450674	441.009	0.0103383	-0.00193222	443.304	0.300361	-0.0239444
433.415	0.00386657	-0.000853825	441.902	0.0084218	-0.00147656	443.682	0.0537324	-0.00963491	444.677	0.00563185	-0.00130054	454.418	0.00494852	-0.00107034	445.3	0.0049487	-0.000420703	461.792	9.48508e-06	-3.13802e-06	427.842	0.00339017	-0.00085306	452.076	0.00156441	-0.000419242	441.297	0.00980766	-0.00183979	443.578	0.293854	-0.0237848
433.715	0.00362541	-0.000804244	442.191	0.00801364	-0.00141021	443.97	0.0510758	-0.00924451	444.987	0.00525207	-0.00122303	454.721	0.00464187	-0.00101167	445.603	0.00482269	-0.000415181	462.09	8.6306e-06	-2.86748e-06	428.135	0.00315633	-0.000800006	452.385	0.00144401	-0.000389768	441.585	0.00930258	-0.00175136	443.852	0.287392	-0.023617
434.015	0.00339833	-0.000757291	442.48	0.00762387	-0.00134668	444.257	0.0485282	-0.00886526	445.298	0.00489515	-0.00114942	455.024	0.0043522	-0.000955667	445.907	0.00469833	-0.000409776	462.388	7.85008e-06	-2.61926e-06	428.427	0.00293715	-0.000749843	452.694	0.00133215	-0.000362148	441.874	0.00882187	-0.0016668	444.125	0.280979	-0.023441
434.315	0.00318458	-0.000712844	442.77	0.00725171	-0.00128584	444.544	0.0460865	-0.00849707	445.608	0.00455993	-0.00107956	455.327	0.00407872	-0.000902238	446.21	0.00457558	-0.00040446	462.686	7.1374e-06	-2.39161e-06	428.719	0.00273183	-0.000702441	453.002	0.00122827	-0.000336284	442.162	0.00836449	-0.00158596	444.399	0.274616	-0.0232568
434.615	0.00298343	-0.000670788	443.059	0.0068964	-0.0012276	444.832	0.0437474	-0.00813988	445.919	0.00424527	-0.00101331	455.63	0.00382067	-0.000851306	446.514	0.00445442	-0.000399206	462.984	6.48691e-06	-2.1829e-06	429.012	0.0025396	-0.000657678	453.311	0.00113187	-0.00031208	442.451	0.00792938	-0.00150871	444.672	0.268306	-0.0230645
434.915	0.00279422	-0.00063101	443.349	0.00655724	-0.00117184	445.119	0.0415078	-0.00779359	446.23	0.00395012	-0.000950524	455.933	0.00357734	-0.000802789	446.817	0.00433484	-0.000393991	463.282	5.89342e-06	-1.99164e-06	429.304	0.00235971	-0.000615431	453.62	0.00104246	-0.000289445	442.739	0.00751555	-0.00143492	444.946	0.262051	-0.0228643
435.214	0.00261628	-0.000593404	443.638	0.00623352	-0.00111847	445.407	0.0393646	-0.0074581	446.54	0.00367342	-0.000891073	456.236	0.003348	-0.000756606	447.121	0.00421684	-0.000388794	463.58	5.35214e-06	-1.81644e-06	429.596	0.00219147	-0.000575586	453.929	0.000959591	-0.000268291	443.027	0.00712205	-0.00136444	445.219	0.255852	-0.0226561
435.514	0.002449	-0.000557864	443.928	0.00592458	-0.00106738	445.694	0.0373147	-0.00713329	446.851	0.00341419	-0.000834819	456.54	0.00313198	-0.000712678	447.424	0.00410042	-0.000383596	463.878	4.85867e-06	-1.656e-06	429.889	0.00203421	-0.000538027	454.238	0.00088282	-0.000248535	443.316	0.00674795	-0.00129716	445.493	0.249713	-0.0224402
435.814	0.00229179	-0.000524291	444.217	0.0056298	-0.0010185	445.981	0.0353552	-0.00681903	447.161	0.00317148	-0.000781629	456.843	0.00292862	-0.000670924	447.728	0.00398559	-0.000378382	464.176	4.40896e-06	-1.50914e-06	430.181	0.00188728	-0.000502646	454.547	0.000811745	-0.000230096	443.604	0.00639237	-0.00123295	445.767	0.243634	-0.0222166
436.114	0.00214408	-0.000492588	444.506	0.00534855	-0.000971713	446.269	0.0334829	-0.00651519	447.472	0.00294437	-0.000731372	457.146	0.00273727	-0.000631266	448.031	0.00387234	-0.000373138	464.474	3.99929e-06	-1.37476e-06	430.473	0.0017501	-0.000469336	454.856	0.000745981	-0.000212899	443.893	0.00605446	-0.00117169	446.04	0.237619	-0.0219856
436.414	0.00200535	-0.000462662	444.796	0.00508027	-0.000926946	446.556	0.031695	-0.0062216	447.782	0.002732	-0.000683922	457.449	0.00255734	-0.000593624	448.335	0.0037607	-0.000367853	464.772	3.62625e-06	-1.25186e-06	430.765	0.00162208	-0.000437997	455.165	0.000685169	-0.00019687	444.181	0.0057334	-0.00111326	446.314	0.231669	-0.0217473
436.714	0.00187508	-0.000434424	445.085	0.00482438	-0.000884113	446.843	0.0299886	-0.00593812	448.093	0.00253353	-0.000639155	457.752	0.00238822	-0.000557921	448.638	0.00365067	-0.000362517	465.07	3.28669e-06	-1.13949e-06	431.058	0.00150267	-0.000408528	455.474	0.000628969	-0.00018194	444.469	0.00542841	-0.00105754	446.587	0.225787	-0.0215019
437.014	0.00175281	-0.000407789	445.375	0.00458035	-0.000843134	447.131	0.0283608	-0.00566457	448.403	0.00234816	-0.000596948	458.055	0.00222937	-0.000524081	448.942	0.00354229	-0.000357123	465.368	2.97774e-06	-1.03679e-06	431.35	0.00139135	-0.000380836	455.782	0.000577062	-0.000168042	444.758	0.00513873	-0.00100442	446.861	0.219973	-0.0212496
437.313	0.00163806	-0.000382675	445.664	0.00434767	-0.00080393	447.418	0.0268088	-0.00540077	448.714	0.00217514	-0.000557184	458.358	0.00208023	-0.000492029	449.245	0.00343556	-0.000351664	465.666	2.69674e-06	-9.42975e-07	431.642	0.00128763	-0.000354829	456.091	0.000529148	-0.000155114	445.046	0.00486366	-0.000953798	447.135	0.21423	-0.0209907
437.613	0.00153041	-0.000359004	445.954	0.00412584	-0.000766428	447.705	0.0253299	-0.00514656	449.024	0.00201375	-0.000519748	458.661	0.00194028	-0.000461692	449.549	0.00333051	-0.000346136	465.964	2.44127e-06	-8.57303e-07	431.935	0.00119105	-0.000330419	456.4	0.000484947	-0.000143096	445.335	0.0046025	-0.000905566	447.408	0.20856	-0.0207253
437.913	0.00142944	-0.000336699	446.243	0.00391439	-0.000730557	447.993	0.0239213	-0.00490173	449.335	0.00186329	-0.00048453	458.964	0.00180904	-0.000432996	449.852	0.00322716	-0.000340536	466.261	2.2091e-06	-7.79101e-07	432.227	0.00110117	-0.000307522	456.709	0.000444194	-0.000131932	445.623	0.00435458	-0.000859622	447.682	0.202964	-0.0204537
438.213	0.00133478	-0.000315691	446.532	0.00371288	-0.000696247	448.28	0.0225805	-0.00466609	449.645	0.00172312	-0.00045142	459.268	0.00168601	-0.000405872	450.156	0.00312553	-0.000334863	466.559	1.9982e-06	-7.07745e-07	432.519	0.00101755	-0.000286057	457.018	0.000406642	-0.000121566	445.911	0.00411929	-0.000815868	447.955	0.197444	-0.0201763
438.513	0.00124605	-0.00029591	446.822	0.00352086	-0.000663434	448.568	0.0213047	-0.00443944	449.956	0.0015926	-0.000420316	459.571	0.00157076	-0.00038025	450.459	0.00302564	-0.000329116	466.857	1.80669e-06	-6.42662e-07	432.811	0.000939819	-0.000265947	457.327	0.000372062	-0.00011195	446.2	0.00389601	-0.000774209	448.229	0.192001	-0.0198931
438.813	0.0011629	-0.00027729	447.111	0.00333792	-0.000632055	448.855	0.0200916	-0.00422158	450.266	0.00147115	-0.000391115	459.874	0.00146283	-0.000356064	450.763	0.00292752	-0.000323296	467.155	1.63287e-06	-5.83326e-07	433.104	0.000867588	-0.000247117	457.636	0.000340236	-0.000103033	446.488	0.00368416	-0.000734553	448.503	0.186638	-0.0196046
439.113	0.00108501	-0.00025977	447.401	0.00316367	-0.000602049	449.142	0.0189386	-0.0040123	450.577	0.00135821	-0.000363721	460.177	0.00136182	-0.000333248	451.066	0.00283119	-0.000317405	467.453	1.47516e-06	-5.29251e-07	433.396	0.000800507	-0.000229497	457.945	0.000310961	-9.47706e-05	446.777	0.00348321	-0.000696813	448.776	0.181355	-0.019311
439.412	0.00101206	-0.000243289	447.69	0.00299773	-0.000573359	449.43	0.0178433	-0.00381139	450.887	0.00125324	-0.000338039	460.48	0.00126733	-0.000311738	451.37	0.00273667	-0.000311446	467.751	1.33212e-06	-4.7999e-07	433.688	0.000738243	-0.000213019	458.254	0.000284051	-8.71198e-05	447.065	0.0032926	-0.000660903	449.05	0.176153	-0.0190126
439.712	0.000943751	-0.00022779	447.98	0.00283972	-0.000545928	449.717	0.0168035	-0.00361864	451.198	0.00115574	-0.00031398	460.783	0.00117898	-0.000291473	451.673	0.00264397	-0.000305421	468.049	1.20246e-06	-4.35134e-07	433.981	0.000680481	-0.000197617	458.562	0.000259327	-8.00397e-05	447.353	0.00311185	-0.000626741	449.323	0.171034	-0.0187098
440.012	0.000879815	-0.000213221	448.269	0.0026893	-0.000519705	450.004	0.0158167	-0.00343383	451.508	0.00106524	-0.000291456	461.086	0.00109641	-0.000272393	451.977	0.00255312	-0.000299336	468.347	1.08496e-06	-3.94305e-07	434.273	0.000626923	-0.00018323	458.871	0.000236625	-7.3492e-05	447.642	0.00294047	-0.000594248	449.597	0.165999	-0.0184027
440.312	0.000819985	-0.000199528	448.558	0.00254614	-0.000494639	450.292	0.0148808	-0.00325674	451.819	0.00098128	-0.000270384	461.389	0.00101929	-0.00025444	452.28	0.00246414	-0.000293196	468.645	9.78527e-07	-3.57158e-07	434.565	0.000577292	-0.000169799	459.18	0.000215794	-6.74405e-05	447.93	0.002778	-0.000563348	449.87	0.16105	-0.0180919
440.612	0.000764012	-0.000186664	448.848	0.00240991	-0.00047068	450.579	0.0139937	-0.00308717	452.129	0.000903437	-0.000250683	461.693	0.00094728	-0.000237558	452.584	0.00237704	-0.000287005	468.943	8.82164e-07	-3.23374e-07	434.858	0.000531323	-0.000157269	459.489	0.000196688	-6.18511e-05	448.219	0.00262401	-0.00053397	450.144	0.156186	-0.0177775
440.912	0.000711662	-0.000174582	449.137	0.0022803	-0.000447782	450.866	0.0131532	-0.00292489	452.44	0.00083131	-0.000232278	461.996	0.000880082	-0.000221693	452.887	0.00229182	-0.000280771	469.241	7.94954e-07	-2.92662e-07	435.15	0.00048877	-0.000145584	459.798	0.000179176	-5.66919e-05	448.507	0.00247807	-0.000506041	450.418	0.151409	-0.01746
441.212	0.000662714	-0.000163237	449.427	0.00215704	-0.000425902	451.154	0.0123573	-0.00276968	452.75	0.000764519	-0.000215094	462.299	0.000817401	-0.000206792	453.191	0.00220851	-0.000274498	469.539	7.16059e-07	-2.64754e-07	435.442	0.000449399	-0.000134696	460.107	0.000163135	-5.19328e-05	448.795	0.00233978	-0.000479496	450.691	0.14672	-0.0171396
441.512	0.000616959	-0.000152589	449.716	0.00203982	-0.000404995	451.441	0.011604	-0.00262133	453.061	0.000702706	-0.000199062	462.602	0.000758959	-0.000192807	453.494	0.00212712	-0.000268195	469.837	6.44718e-07	-2.39406e-07	435.734	0.000412992	-0.000124555	460.416	0.000148448	-4.75455e-05	449.084	0.00220877	-0.00045427	450.965	0.142119	-0.0168167
441.811	0.000574201	-0.000142596	450.006	0.00192838	-0.000385021	451.729	0.0108914	-0.00247962	453.372	0.000645534	-0.000184114	462.905	0.000704493	-0.000179688	453.798	0.00204764	-0.000261868	470.135	5.80235e-07	-2.16391e-07	436.027	0.000379344	-0.000115116	460.725	0.00013501	-4.35035e-05	449.372	0.00208467	-0.000430302	451.238	0.137607	-0.0164916
442.111	0.000534253	-0.000133221	450.295	0.00182247	-0.000365942	452.016	0.0102177	-0.00234434	453.682	0.000592688	-0.000170187	463.208	0.000653756	-0.000167389	454.101	0.00197009	-0.000255524	470.433	5.21977e-07	-1.95505e-07	436.319	0.000348263	-0.000106335	461.034	0.000122722	-3.97821e-05	449.66	0.00196714	-0.000407531	451.512	0.133184	-0.0161647
442.411	0.000496942	-0.000124428	450.584	0.00172182	-0.000347719	452.303	0.00958115	-0.00221527	453.993	0.000543868	-0.000157219	463.511	0.000606511	-0.000155866	454.405	0.00189447	-0.00024917	470.731	4.69364e-07	-1.76558e-07	436.611	0.000319568	-9.81716e-05	461.343	0.000111491	-3.63579e-05	449.949	0.00185585	-0.000385901	451.786	0.128852	-0.0158363
442.711	0.000462104	-0.000116184	450.874	0.00162622	-0.000330317	452.591	0.00897992	-0.00209221	454.303	0.000498795	-0.000145152	463.814	0.000562537	-0.000145075	454.708	0.00182077	-0.000242814	471.029	4.2187e-07	-1.59378e-07	436.904	0.00029309	-9.05863e-05	461.651	0.000101233	-3.32092e-05	450.237	0.00175048	-0.000365359	452.059	0.124609	-0.0155067
443.011	0.000429582	-0.000108457	451.163	0.00153543	-0.000313701	452.878	0.00841239	-0.00197495	454.614	0.000457206	-0.000133932	464.117	0.000521624	-0.000134977	455.012	0.00174901	-0.000236464	471.327	3.79017e-07	-1.43807e-07	437.196	0.000268671	-8.35424e-05	461.96	9.18683e-05	-3.03156e-05	450.526	0.00165074	-0.000345852	452.333	0.120457	-0.0151763
443.311	0.000399232	-0.000101215	451.453	0.00144922	-0.000297839	453.165	0.00787695	-0.00186328	454.924	0.000418855	-0.000123505	464.421	0.000483573	-0.000125532	455.315	0.00167916	-0.000230127	471.625	3.40367e-07	-1.297e-07	437.488	0.000246163	-7.7005e-05	462.269	8.33248e-05	-2.76582e-05	450.814	0.00155634	-0.000327331	452.606	0.116396	-0.0148453
443.611	0.000370916	-9.44313e-05	451.742	0.0013674	-0.000282699	453.453	0.00737204	-0.00175701	455.235	0.000383511	-0.000113823	464.724	0.000448199	-0.000116703	455.619	0.00161124	-0.00022381	471.923	3.05524e-07	-1.16926e-07	437.78	0.000225427	-7.09413e-05	462.578	7.55348e-05	-2.52192e-05	451.102	0.001467	-0.000309747	452.88	0.112425	-0.0145142
443.91	0.000344505	-8.80774e-05	452.032	0.00128976	-0.000268251	453.74	0.00689619	-0.00165592	455.545	0.000350957	-0.000104837	465.027	0.000415326	-0.000108453	455.922	0.00154522	-0.00021752	472.221	2.74127e-07	-1.05363e-07	438.073	0.000206334	-6.53202e-05	462.887	6.84358e-05	-2.29819e-05	451.391	0.00138249	-0.000293057	453.154	0.108544	-0.0141833
444.21	0.000319878	-8.21281e-05	452.321	0.00121611	-0.000254466	454.027	0.00644795	-0.00155983	455.856	0.00032099	-9.65039e-05	465.33	0.000384787	-0.00010075	456.226	0.0014811	-0.000211265	472.519	2.45848e-07	-9.49006e-08	438.365	0.000188763	-6.01124e-05	463.196	6.19703e-05	-2.09311e-05	451.679	0.00130254	-0.000277217	453.427	0.104754	-0.0138528
444.51	0.000296921	-7.6559e-05	452.61	0.00114627	-0.000241316	454.315	0.00602594	-0.00146854	456.166	0.000293422	-8.87805e-05	465.633	0.000356428	-9.35613e-05	456.529	0.00141887	-0.000205052	472.817	2.20388e-07	-8.54391e-08	438.657	0.000172602	-5.52903e-05	463.505	5.60852e-05	-1.90523e-05	451.968	0.00122692	-0.000262186	453.701	0.101055	-0.013523
444.81	0.000275527	-7.13474e-05	452.9	0.00108005	-0.000228775	454.602	0.00562884	-0.00138187	456.477	0.000268075	-8.1627e-05	465.936	0.000330101	-8.68553e-05	456.833	0.00135851	-0.000198887	473.115	1.97476e-07	-7.68862e-08	438.95	0.000157746	-5.08279e-05	463.814	5.07313e-05	-1.73322e-05	452.256	0.00115542	-0.000247923	453.974	0.0974447	-0.0131944
445.11	0.000255595	-6.64715e-05	453.189	0.0010173	-0.000216817	454.89	0.00525537	-0.00129963	456.787	0.000244784	-7.50058e-05	466.239	0.000305669	-8.06032e-05	457.136	0.0013	-0.000192777	473.413	1.76868e-07	-6.91582e-08	439.242	0.000144095	-4.67008e-05	464.123	4.58637e-05	-1.57583e-05	452.544	0.00108783	-0.000234392	454.248	0.0939244	-0.0128671
445.41	0.00023703	-6.19109e-05	453.479	0.000957844	-0.000205417	455.177	0.00490431	-0.00122165	457.098	0.000223395	-6.88812e-05	466.542	0.000283003	-7.47771e-05	457.44	0.00124333	-0.000186729	473.711	1.58339e-07	-6.21785e-08	439.534	0.00013156	-4.28859e-05	464.431	4.14406e-05	-1.43191e-05	452.833	0.00102393	-0.000221558	454.522	0.0904932	-0.0125415
445.71	0.000219745	-5.76465e-05	453.768	0.000901534	-0.000194553	455.464	0.0045745	-0.00114774	457.408	0.000203764	-6.32196e-05	466.845	0.000261982	-6.93508e-05	457.743	0.00118847	-0.000180748	474.009	1.41688e-07	-5.58775e-08	439.827	0.000120055	-3.93617e-05	464.74	3.74238e-05	-1.30039e-05	453.121	0.000963543	-0.000209384	454.795	0.0871505	-0.0122178
446.009	0.000203654	-5.36601e-05	454.058	0.000848221	-0.000184201	455.752	0.00426479	-0.00107773	457.719	0.000185757	-5.79894e-05	467.149	0.000242492	-6.42992e-05	458.047	0.00113541	-0.00017484	474.307	1.26731e-07	-5.01918e-08	440.119	0.0001095	-3.61079e-05	465.049	3.37779e-05	-1.18028e-05	453.41	0.000906487	-0.00019784	455.069	0.0838958	-0.0118964
446.309	0.000188681	-4.99345e-05	454.347	0.000797761	-0.000174341	456.039	0.00397413	-0.00101146	458.029	0.000169249	-5.31608e-05	467.452	0.000224427	-5.95988e-05	458.35	0.00108412	-0.000169011	474.605	1.13303e-07	-4.50635e-08	440.411	9.98239e-05	-3.31054e-05	465.358	3.04708e-05	-1.07064e-05	453.698	0.000852587	-0.000186894	455.342	0.0807283	-0.0115774
446.609	0.000174751	-4.64537e-05	454.637	0.00075002	-0.000164951	456.326	0.00370149	-0.000948774	458.34	0.000154125	-4.87058e-05	467.755	0.000207687	-5.52271e-05	458.654	0.00103457	-0.000163266	474.903	1.01252e-07	-4.04401e-08	440.703	9.09567e-05	-3.03365e-05	465.667	2.74725e-05	-9.70639e-06	453.986	0.000801679	-0.000176517	455.616	0.0776474	-0.0112611
446.909	0.000161797	-4.32024e-05	454.926	0.000704865	-0.000156011	456.614	0.00344588	-0.000889501	458.65	0.000140277	-4.45982e-05	468.058	0.000192179	-5.11629e-05	458.957	0.000986732	-0.000157609	475.201	9.04426e-08	-3.62737e-08	440.996	8.28354e-05	-2.77844e-05	465.976	2.47559e-05	-8.79473e-06	454.275	0.000753609	-0.00016668	455.889	0.0746522	-0.0109479
447.209	0.000149752	-4.01665e-05	455.215	0.000662173	-0.000147503	456.901	0.00320636	-0.000833493	458.961	0.000127603	-4.08133e-05	468.361	0.000177816	-4.73864e-05	459.261	0.000940587	-0.000152046	475.499	8.07517e-08	-3.25208e-08	441.288	7.54013e-05	-2.54335e-05	466.285	2.22958e-05	-7.96415e-06	454.563	0.000708228	-0.000157358	456.163	0.0717418	-0.0106378
447.509	0.000138558	-3.73323e-05	455.505	0.000621825	-0.000139407	457.189	0.00298204	-0.000780602	459.271	0.000116012	-3.7328e-05	468.664	0.000164515	-4.38786e-05	459.564	0.0008961	-0.00014658	475.797	7.20677e-08	-2.91417e-08	441.58	6.85999e-05	-2.32691e-05	466.594	2.00693e-05	-7.20789e-06	454.852	0.000665394	-0.000148523	456.437	0.0689152	-0.0103312
447.809	0.000128157	-3.46872e-05	455.794	0.000583705	-0.000131707	457.476	0.00277207	-0.000730683	459.582	0.000105417	-3.41205e-05	468.967	0.000152202	-4.06218e-05	459.868	0.000853242	-0.000141215	476.095	6.429e-08	-2.61006e-08	441.873	6.23805e-05	-2.12776e-05	466.903	1.80554e-05	-6.51974e-06	455.14	0.000624974	-0.000140152	456.71	0.0661716	-0.0100282
448.108	0.000118496	-3.22194e-05	456.084	0.000547704	-0.000124385	457.763	0.00257563	-0.000683597	459.892	9.57377e-05	-3.11706e-05	469.27	0.000140806	-3.75992e-05	460.171	0.00081198	-0.000135955	476.393	5.73275e-08	-2.33648e-08	442.165	5.66965e-05	-1.94463e-05	467.212	1.62348e-05	-5.89393e-06	455.428	0.000586842	-0.000132222	456.984	0.0635099	-0.00972906
448.408	0.000109524	-2.99176e-05	456.373	0.000513717	-0.000117426	458.051	0.00239194	-0.000639209	460.203	8.69004e-05	-2.84594e-05	469.573	0.000130259	-3.47951e-05	460.475	0.000772282	-0.000130803	476.691	5.10981e-08	-2.09047e-08	442.457	5.15044e-05	-1.77631e-05	467.52	1.45899e-05	-5.32517e-06	455.717	0.000550875	-0.000124711	457.257	0.0609288	-0.00943395
448.708	0.000101197	-2.77712e-05	456.663	0.000481644	-0.000110813	458.338	0.00222027	-0.000597389	460.514	7.88365e-05	-2.5969e-05	469.877	0.0001205	-3.21947e-05	460.778	0.000734114	-0.000125761	476.989	4.55276e-08	-1.86932e-08	442.75	4.67643e-05	-1.6217e-05	467.829	1.31046e-05	-4.80856e-06	456.005	0.00051696	-0.000117598	457.531	0.0584274	-0.00914304
449.008	9.34695e-05	-2.57704e-05	456.952	0.00045139	-0.000104531	458.625	0.00205992	-0.000558012	460.824	7.14825e-05	-2.36829e-05	470.18	0.000111472	-2.97841e-05	461.082	0.000697442	-0.000120833	477.287	4.05494e-08	-1.6706e-08	443.042	4.2439e-05	-1.47977e-05	468.138	1.17641e-05	-4.3396e-06	456.294	0.000484988	-0.000110863	457.805	0.0560043	-0.00885652
449.308	8.63012e-05	-2.39058e-05	457.241	0.000422862	-9.85655e-05	458.913	0.00191022	-0.000520957	461.135	6.47797e-05	-2.15857e-05	470.483	0.000103122	-2.75501e-05	461.385	0.00066223	-0.00011602	477.585	3.61031e-08	-1.4921e-08	443.334	3.84944e-05	-1.34954e-05	468.447	1.0555e-05	-3.91416e-06	456.582	0.000454854	-0.000104487	458.078	0.0536584	-0.00857452
449.608	7.96537e-05	-2.21687e-05	457.531	0.000395973	-9.29033e-05	459.2	0.00177053	-0.000486107	461.445	5.86739e-05	-1.96629e-05	470.786	9.5398e-05	-2.54806e-05	461.689	0.000628443	-0.000111325	477.883	3.21344e-08	-1.3318e-08	443.626	3.48988e-05	-1.23012e-05	468.756	9.46513e-06	-3.52843e-06	456.87	0.000426461	-9.84517e-05	458.352	0.0513884	-0.0082972
449.908	7.34914e-05	-2.05508e-05	457.82	0.000370639	-8.75306e-05	459.487	0.00164025	-0.00045335	461.756	5.31152e-05	-1.79011e-05	471.089	8.82555e-05	-2.3564e-05	461.992	0.000596045	-0.000106748	478.181	2.85946e-08	-1.18788e-08	443.919	3.16231e-05	-1.12067e-05	469.065	8.48319e-06	-3.17891e-06	457.159	0.000399715	-9.27405e-05	458.625	0.0491929	-0.00802469
450.207	6.77807e-05	-1.90445e-05	458.11	0.00034678	-8.24346e-05	459.775	0.00151881	-0.000422579	462.066	4.80575e-05	-1.6288e-05	471.392	8.16508e-05	-2.17895e-05	462.296	0.000565	-0.000102291	478.479	2.54398e-08	-1.0587e-08	444.211	2.86405e-05	-1.02042e-05	469.374	7.59901e-06	-2.86239e-06	457.447	0.000374527	-8.73369e-05	458.899	0.0470706	-0.0077571
450.507	6.24905e-05	-1.76425e-05	458.399	0.000324319	-7.76028e-05	460.062	0.00140568	-0.000393689	462.377	4.34581e-05	-1.48117e-05	471.695	7.5544e-05	-2.01472e-05	462.599	0.000535271	-9.7955e-05	478.777	2.26305e-08	-9.42744e-09	444.503	2.59261e-05	-9.28652e-06	469.683	6.80332e-06	-2.57594e-06	457.736	0.000350813	-8.22253e-05	459.173	0.0450202	-0.00749455
450.807	5.75914e-05	-1.63379e-05	458.689	0.000303184	-7.30234e-05	460.35	0.00130034	-0.000366582	462.687	3.9278e-05	-1.34616e-05	471.998	6.98978e-05	-1.86275e-05	462.903	0.000506821	-9.37405e-05	479.075	2.01313e-08	-8.3867e-09	444.796	2.34571e-05	-8.44687e-06	469.992	6.08766e-06	-2.31684e-06	458.024	0.000328494	-7.7391e-05	459.446	0.0430402	-0.00723713
451.107	5.30562e-05	-1.51244e-05	458.978	0.000283305	-6.8685e-05	460.637	0.0012023	-0.000341161	462.998	3.5481e-05	-1.22276e-05	472.301	6.46777e-05	-1.72216e-05	463.206	0.000479613	-8.9648e-05	479.373	1.79106e-08	-7.45242e-09	445.088	2.12125e-05	-7.67907e-06	470.3	5.44435e-06	-2.08263e-06	458.312	0.000307493	-7.28198e-05	459.72	0.0411292	-0.00698493
451.407	4.88594e-05	-1.3996e-05	459.267	0.000264614	-6.45765e-05	460.924	0.00111111	-0.000317337	463.308	3.20341e-05	-1.11005e-05	472.605	5.98517e-05	-1.59214e-05	463.51	0.000453611	-8.56774e-05	479.671	1.59398e-08	-6.61345e-09	445.38	1.91731e-05	-6.97737e-06	470.609	4.86639e-06	-1.87104e-06	458.601	0.000287738	-6.84985e-05	459.993	0.0392857	-0.00673803
451.707	4.49771e-05	-1.2947e-05	459.557	0.000247049	-6.06874e-05	461.212	0.00102633	-0.000295022	463.619	2.89067e-05	-1.00716e-05	472.908	5.53902e-05	-1.47191e-05	463.813	0.000428776	-8.18287e-05	479.969	1.41937e-08	-5.85965e-09	445.672	1.7321e-05	-6.33644e-06	470.918	4.34745e-06	-1.68e-06	458.889	0.000269161	-6.44143e-05	460.267	0.0375084	-0.00649649
452.007	4.13871e-05	-1.19723e-05	459.846	0.00023055	-5.70075e-05	461.499	0.000947555	-0.000274131	463.929	2.60707e-05	-9.13283e-06	473.211	5.12655e-05	-1.36076e-05	464.117	0.000405072	-7.81013e-05	480.267	1.26496e-08	-5.18183e-09	445.965	1.56399e-05	-5.75134e-06	471.227	3.88176e-06	-1.50762e-06	459.178	0.000251697	-6.05552e-05	460.541	0.0357956	-0.00626036
452.306	3.80687e-05	-1.10668e-05	460.136	0.000215057	-5.35271e-05	461.786	0.000874395	-0.000254587	464.24	2.35006e-05	-8.27694e-06	473.514	4.74523e-05	-1.25803e-05	464.42	0.000382463	-7.44948e-05	480.565	1.12873e-08	-4.57161e-09	446.257	1.41148e-05	-5.21752e-06	471.536	3.46408e-06	-1.35216e-06	459.466	0.000235285	-5.69095e-05	460.814	0.0341459	-0.0060297
452.606	3.50023e-05	-1.0226e-05	460.425	0.000200517	-5.02367e-05	462.074	0.000806488	-0.000236311	464.55	2.11726e-05	-7.49704e-06	473.817	4.39268e-05	-1.16308e-05	464.724	0.000360913	-7.10081e-05	480.863	1.00889e-08	-4.02137e-09	446.549	1.27321e-05	-4.73074e-06	471.845	3.08969e-06	-1.21205e-06	459.754	0.000219865	-5.34664e-05	461.088	0.0325579	-0.00580453
452.906	3.217e-05	-9.44539e-06	460.715	0.000186877	-4.71274e-05	462.361	0.000743488	-0.000219232	464.861	1.90651e-05	-6.78683e-06	474.12	4.06673e-05	-1.07535e-05	465.027	0.000340384	-6.76403e-05	481.161	9.03876e-09	-3.52416e-09	446.842	1.1479e-05	-4.28712e-06	472.154	2.75427e-06	-1.08585e-06	460.043	0.000205383	-5.02154e-05	461.361	0.0310299	-0.00558488
453.206	2.9555e-05	-8.72104e-06	461.004	0.000174087	-4.41906e-05	462.648	0.000685072	-0.000203281	465.171	1.71584e-05	-6.14045e-06	474.423	3.76535e-05	-9.94286e-06	465.331	0.000320842	-6.439e-05	481.459	8.12286e-09	-3.0736e-09	447.134	1.0344e-05	-3.88304e-06	472.463	2.45395e-06	-9.72248e-07	460.331	0.000191786	-4.71467e-05	461.635	0.0295605	-0.00537077
453.506	2.71414e-05	-8.0491e-06	461.293	0.000162099	-4.14178e-05	462.936	0.000630935	-0.000188391	465.482	1.54342e-05	-5.55253e-06	474.726	3.48667e-05	-9.19399e-06	465.634	0.000302251	-6.1256e-05	481.757	7.32905e-09	-2.66386e-09	447.426	9.31649e-06	-3.5152e-06	472.772	2.1852e-06	-8.7004e-07	460.62	0.000179024	-4.42508e-05	461.908	0.0281482	-0.00516219
453.806	2.49146e-05	-7.42601e-06	461.583	0.000150869	-3.88012e-05	463.223	0.00058079	-0.000174501	465.792	1.3876e-05	-5.0181e-06	475.029	3.22896e-05	-8.50222e-06	465.938	0.000284576	-5.82365e-05	482.055	6.64679e-09	-2.28953e-09	447.719	8.38684e-06	-3.18052e-06	473.081	1.94484e-06	-7.78141e-07	460.908	0.00016705	-4.15187e-05	462.182	0.0267914	-0.00495916
454.106	2.28611e-05	-6.84842e-06	461.872	0.000140353	-3.6333e-05	463.511	0.000534366	-0.000161549	466.103	1.24685e-05	-4.53258e-06	475.333	2.99062e-05	-7.86322e-06	466.241	0.000267784	-5.53299e-05	482.353	6.067e-09	-1.94564e-09	448.011	7.54614e-06	-2.87619e-06	473.389	1.72998e-06	-6.95558e-07	461.196	0.000155819	-3.89419e-05	462.456	0.0254887	-0.00476165
454.405	2.0968e-05	-6.31322e-06	462.162	0.000130511	-3.40061e-05	463.798	0.000491411	-0.000149481	466.413	1.11979e-05	-4.09176e-06	475.636	2.77016e-05	-7.27301e-06	466.545	0.00025184	-5.25343e-05	482.651	5.58202e-09	-1.62752e-09	448.303	6.78629e-06	-2.5996e-06	473.698	1.53804e-06	-6.21392e-07	461.485	0.000145289	-3.65124e-05	462.729	0.0242385	-0.00456966
454.705	1.92236e-05	-5.81748e-06	462.451	0.000121303	-3.18132e-05	464.085	0.000451685	-0.000138241	466.724	1.00516e-05	-3.69177e-06	475.939	2.56623e-05	-6.72786e-06	466.848	0.000236711	-4.98475e-05	482.949	5.18545e-09	-1.3308e-09	448.595	6.09987e-06	-2.34838e-06	474.007	1.36666e-06	-5.54823e-07	461.773	0.00013542	-3.42223e-05	463.003	0.0230393	-0.00438314
455.005	1.76168e-05	-5.35847e-06	462.741	0.000112693	-2.97477e-05	464.373	0.000414966	-0.000127779	467.034	9.01782e-06	-3.32903e-06	476.242	2.37756e-05	-6.22435e-06	467.152	0.000222365	-4.72676e-05	483.247	4.87216e-09	-1.05135e-09	448.888	5.48011e-06	-2.12031e-06	474.316	1.21372e-06	-4.95109e-07	462.062	0.000126172	-3.20644e-05	463.276	0.0218896	-0.00420207
455.305	1.61374e-05	-4.93363e-06	463.03	0.000104646	-2.78031e-05	464.66	0.000381043	-0.000118047	467.345	8.08617e-06	-3.00027e-06	476.545	2.20299e-05	-5.75927e-06	467.455	0.000208771	-4.47923e-05	483.545	4.63817e-09	-7.85214e-10	449.18	4.92084e-06	-1.91338e-06	474.625	1.07732e-06	-4.41574e-07	462.35	0.000117511	-3.00316e-05	463.55	0.020788	-0.00402641
455.605	1.47759e-05	-4.54057e-06	463.319	9.71286e-05	-2.59733e-05	464.947	0.000349721	-0.000108999	467.656	7.24699e-06	-2.70249e-06	476.848	2.04144e-05	-5.3297e-06	467.758	0.000195897	-4.24193e-05	483.843	4.48066e-09	-5.28577e-10	449.472	4.41642e-06	-1.72574e-06	474.934	9.55739e-07	-3.93608e-07	462.638	0.000109402	-2.81173e-05	463.824	0.0197331	-0.00385611
455.905	1.35233e-05	-4.17706e-06	463.609	9.01093e-05	-2.42522e-05	465.235	0.000320814	-0.000100592	467.966	6.49151e-06	-2.43292e-06	477.151	1.89192e-05	-4.93288e-06	468.062	0.000183713	-4.01461e-05	484.141	4.3979e-09	-2.77712e-10	449.765	3.9617e-06	-1.55568e-06	475.243	8.47424e-07	-3.50656e-07	462.927	0.000101813	-2.63152e-05	464.097	0.0187232	-0.00369111
456.205	1.23716e-05	-3.84101e-06	463.898	8.35582e-05	-2.26343e-05	465.522	0.000294151	-9.27843e-05	468.277	5.81177e-06	-2.18904e-06	477.454	1.75351e-05	-4.5663e-06	468.365	0.000172189	-3.79704e-05	484.439	4.38928e-09	-2.89318e-11	450.057	3.55201e-06	-1.40163e-06	475.552	7.50982e-07	-3.12216e-07	463.215	9.47129e-05	-2.46194e-05	464.371	0.0177571	-0.00353136
456.504	1.13129e-05	-3.53048e-06	464.188	7.74471e-05	-2.11141e-05	465.809	0.000269571	-8.55378e-05	468.587	5.2005e-06	-1.96852e-06	477.757	1.62537e-05	-4.22763e-06	468.669	0.000161296	-3.58896e-05	484.737	4.45527e-09	2.21452e-10	450.349	3.18308e-06	-1.26218e-06	475.861	6.65161e-07	-2.77834e-07	463.504	8.80728e-05	-2.3024e-05	464.644	0.0168332	-0.00337679
456.804	1.03403e-05	-3.24364e-06	464.477	7.17493e-05	-1.96864e-05	466.097	0.000246922	-7.88159e-05	468.898	4.65111e-06	-1.76925e-06	478.061	1.50671e-05	-3.91471e-06	468.972	0.000151008	-3.39011e-05	485.035	4.59747e-09	4.77181e-10	450.641	2.85104e-06	-1.13599e-06	476.169	5.88833e-07	-2.471e-07	463.792	8.18655e-05	-2.15236e-05	464.918	0.0159502	-0.00322732
457.104	9.44708e-06	-2.97881e-06	464.767	6.64393e-05	-1.83463e-05	466.384	0.000226064	-7.25841e-05	469.208	4.15761e-06	-1.58927e-06	478.364	1.39681e-05	-3.62554e-06	469.276	0.000141295	-3.20023e-05	485.333	4.81861e-09	7.42092e-10	450.934	2.55234e-06	-1.02188e-06	476.478	5.20986e-07	-2.19643e-07	464.08	7.60649e-05	-2.01132e-05	465.192	0.0151068	-0.0030829
457.404	8.62715e-06	-2.73439e-06	465.056	6.14932e-05	-1.7089e-05	466.672	0.000206865	-6.68099e-05	469.519	3.71455e-06	-1.42683e-06	478.667	1.29502e-05	-3.35829e-06	469.579	0.000132132	-3.01905e-05	485.631	5.12261e-09	1.02017e-09	451.226	2.2838e-06	-9.18749e-07	476.787	4.60713e-07	-1.95127e-07	464.369	7.06465e-05	-1.87878e-05	465.465	0.0143015	-0.00294343
457.704	7.87484e-06	-2.5089e-06	465.345	5.68884e-05	-1.591e-05	466.959	0.000189203	-6.14629e-05	469.829	3.31699e-06	-1.28029e-06	478.97	1.20071e-05	-3.11125e-06	469.883	0.000123494	-2.84632e-05	485.929	5.51465e-09	1.31561e-09	451.518	2.04248e-06	-8.25585e-07	477.096	4.07197e-07	-1.73249e-07	464.657	6.55873e-05	-1.75426e-05	465.739	0.013533	-0.00280883
458.004	7.18487e-06	-2.30097e-06	465.635	5.26033e-05	-1.4805e-05	467.246	0.000172962	-5.65141e-05	470.14	2.96046e-06	-1.14817e-06	479.273	1.11333e-05	-2.88286e-06	470.186	0.000115355	-2.68177e-05	486.227	6.00122e-09	1.63283e-09	451.811	1.82575e-06	-7.41473e-07	477.405	3.59709e-07	-1.53737e-07	464.946	6.08652e-05	-1.63734e-05	466.012	0.0128001	-0.00267901
458.304	6.55237e-06	-2.10932e-06	465.924	4.86179e-05	-1.377e-05	467.534	0.000158038	-5.19365e-05	470.45	2.64089e-06	-1.02912e-06	479.576	1.03235e-05	-2.67167e-06	470.49	0.000107691	-2.52512e-05	486.525	6.59022e-09	1.97658e-09	452.103	1.63121e-06	-6.65574e-07	477.714	3.17592e-07	-1.36345e-07	465.234	5.64597e-05	-1.52759e-05	466.286	0.0121014	-0.00255389
458.603	5.97282e-06	-1.93275e-06	466.214	4.49129e-05	-1.28009e-05	467.821	0.000144329	-4.77046e-05	470.761	2.35462e-06	-9.21913e-07	479.879	9.57289e-06	-2.47635e-06	470.793	0.000100479	-2.37612e-05	486.823	7.29109e-09	2.35199e-09	452.395	1.45667e-06	-5.97125e-07	478.023	2.80262e-07	-1.20851e-07	465.522	5.23511e-05	-1.42461e-05	466.559	0.0114356	-0.00243337
458.903	5.44203e-06	-1.77014e-06	466.503	4.14704e-05	-1.1894e-05	468.108	0.000131744	-4.37946e-05	471.071	2.09831e-06	-8.25423e-07	480.182	8.87704e-06	-2.29568e-06	471.097	9.36978e-05	-2.23449e-05	487.121	8.11491e-09	2.76458e-09	452.688	1.30017e-06	-5.35425e-07	478.332	2.47193e-07	-1.07056e-07	465.811	4.85212e-05	-1.32801e-05	466.833	0.0108016	-0.00231735
459.203	4.95612e-06	-1.62046e-06	466.793	3.82734e-05	-1.10458e-05	468.396	0.000120197	-4.01839e-05	471.382	1.86895e-06	-7.38629e-07	480.485	8.23186e-06	-2.12851e-06	471.4	8.73245e-05	-2.09998e-05	487.419	9.07457e-09	3.22041e-09	452.98	1.15992e-06	-4.79841e-07	478.641	2.17916e-07	-9.47803e-08	466.099	4.49524e-05	-1.23745e-05	467.107	0.0101981	-0.00220574
459.503	4.51151e-06	-1.48273e-06	467.082	3.53059e-05	-1.0253e-05	468.683	0.000109607	-3.68516e-05	471.692	1.66382e-06	-6.60599e-07	480.789	7.63358e-06	-1.97381e-06	471.704	8.13385e-05	-1.97231e-05	487.717	1.01849e-08	3.72609e-09	453.272	1.03429e-06	-4.29791e-07	478.95	1.92011e-07	-8.38619e-08	466.388	4.16284e-05	-1.15257e-05	467.38	0.00962403	-0.00209844
459.803	4.10488e-06	-1.35607e-06	467.371	3.25528e-05	-9.51219e-06	468.97	9.99e-05	-3.37779e-05	472.003	1.48046e-06	-5.90487e-07	481.092	7.0787e-06	-1.8306e-06	472.007	7.57201e-05	-1.85124e-05	488.015	1.1463e-08	4.2889e-09	453.564	9.21831e-07	-3.84749e-07	479.258	1.69105e-07	-7.41562e-08	466.676	3.85337e-05	-1.07306e-05	467.654	0.00907812	-0.00199534
460.103	3.73316e-06	-1.23964e-06	467.661	2.99999e-05	-8.82045e-06	469.258	9.10077e-05	-3.09444e-05	472.313	1.31665e-06	-5.27526e-07	481.395	6.56401e-06	-1.69802e-06	472.311	7.04498e-05	-1.73651e-05	488.313	1.29282e-08	4.91687e-09	453.857	8.21213e-07	-3.44234e-07	479.567	1.48862e-07	-6.55328e-08	466.964	3.56538e-05	-9.98596e-06	467.927	0.0085593	-0.00189634
460.403	3.39353e-06	-1.13265e-06	467.95	2.76338e-05	-8.17483e-06	469.545	8.28656e-05	-2.83336e-05	472.624	1.17039e-06	-4.71016e-07	481.698	6.08654e-06	-1.57523e-06	472.614	6.55093e-05	-1.62786e-05	488.611	1.46025e-08	5.61883e-09	454.149	7.31242e-07	-3.07809e-07	479.876	1.30985e-07	-5.78747e-08	467.253	3.29749e-05	-9.28897e-06	468.201	0.00806648	-0.00180134
460.702	3.08336e-06	-1.03439e-06	468.24	2.54421e-05	-7.57258e-06	469.833	7.54144e-05	-2.59296e-05	472.934	1.03987e-06	-4.20324e-07	482.001	5.64354e-06	-1.4615e-06	472.918	6.08809e-05	-1.52504e-05	488.909	1.6511e-08	6.4046e-09	454.441	6.50838e-07	-2.75078e-07	480.185	1.15208e-07	-5.1077e-08	467.541	3.0484e-05	-8.63684e-06	468.475	0.00759857	-0.00171023
461.002	2.80024e-06	-9.44185e-07	468.529	2.34129e-05	-7.01108e-06	470.12	6.85989e-05	-2.3717e-05	473.245	9.23465e-07	-3.74876e-07	482.304	5.23248e-06	-1.35612e-06	473.221	5.65475e-05	-1.42782e-05	489.207	1.86819e-08	7.28502e-09	454.734	5.79027e-07	-2.45679e-07	480.494	1.01293e-07	-4.50455e-08	467.83	2.81691e-05	-8.02692e-06	468.748	0.00715457	-0.0016229
461.302	2.54193e-06	-8.61413e-07	468.819	2.15351e-05	-6.48786e-06	470.407	6.23683e-05	-2.16819e-05	473.555	8.19704e-07	-3.34149e-07	482.607	4.85103e-06	-1.25846e-06	473.525	5.24929e-05	-1.33596e-05	489.505	2.11469e-08	8.27213e-09	455.026	5.14931e-07	-2.19287e-07	480.803	8.90315e-08	-3.9696e-08	468.118	2.60186e-05	-7.45675e-06	469.022	0.00673344	-0.00153925
461.602	2.3064e-06	-7.85496e-07	469.108	1.97983e-05	-6.00057e-06	470.695	5.66753e-05	-1.9811e-05	473.866	7.2727e-07	-2.97673e-07	482.91	4.49702e-06	-1.16793e-06	473.828	4.87015e-05	-1.24922e-05	489.803	2.39419e-08	9.37926e-09	455.318	4.57757e-07	-1.95603e-07	481.112	7.82348e-08	-3.49528e-08	468.406	2.40217e-05	-6.92395e-06	469.295	0.00633423	-0.00145917
461.902	2.09173e-06	-7.15897e-07	469.397	1.81929e-05	-5.54697e-06	470.982	5.14763e-05	-1.80921e-05	474.176	6.44976e-07	-2.65019e-07	483.213	4.16845e-06	-1.08399e-06	474.132	4.51586e-05	-1.16738e-05	490.101	2.71069e-08	1.06212e-08	455.61	4.06793e-07	-1.74359e-07	481.421	6.87369e-08	-3.07482e-08	468.695	2.21684e-05	-6.42629e-06	469.569	0.00595597	-0.00138256
462.202	1.89618e-06	-6.52118e-07	469.687	1.67095e-05	-5.12496e-06	471.269	4.67309e-05	-1.65136e-05	474.487	5.71755e-07	-2.35802e-07	483.517	3.86347e-06	-1.00614e-06	474.435	4.18498e-05	-1.09021e-05	490.399	3.06871e-08	1.20145e-08	455.903	3.61397e-07	-1.55309e-07	481.73	6.039e-08	-2.70216e-08	468.983	2.04491e-05	-5.96165e-06	469.843	0.00559776	-0.00130931
462.502	1.71816e-06	-5.93699e-07	469.976	1.53398e-05	-4.73254e-06	471.557	4.24017e-05	-1.5065e-05	474.798	5.06648e-07	-2.0967e-07	483.82	3.58039e-06	-9.33933e-07	474.739	3.87617e-05	-1.0175e-05	490.697	3.4733e-08	1.35772e-08	456.195	3.20992e-07	-1.38233e-07	482.038	5.30634e-08	-2.37188e-08	469.272	1.88548e-05	-5.52804e-06	470.116	0.00525869	-0.00123931
462.801	1.55617e-06	-5.4021e-07	470.266	1.40756e-05	-4.36784e-06	471.844	3.84544e-05	-1.37362e-05	475.108	4.48795e-07	-1.86307e-07	484.123	3.31761e-06	-8.66934e-07	475.042	3.58814e-05	-9.49042e-06	490.995	3.93011e-08	1.53296e-08	456.487	2.8506e-07	-1.22931e-07	482.347	4.66412e-08	-2.0791e-08	469.56	1.73772e-05	-5.12357e-06	470.39	0.00493792	-0.00117247
463.101	1.40886e-06	-4.91256e-07	470.555	1.29095e-05	-4.02906e-06	472.131	3.48571e-05	-1.25181e-05	475.419	3.97426e-07	-1.65429e-07	484.426	3.07368e-06	-8.04757e-07	475.346	3.31966e-05	-8.84629e-06	491.293	4.44546e-08	1.72942e-08	456.78	2.53135e-07	-1.0922e-07	482.656	4.10209e-08	-1.81948e-08	469.848	1.60083e-05	-4.74643e-06	470.663	0.0046346	-0.00110866
463.401	1.27499e-06	-4.46471e-07	470.845	1.18344e-05	-3.71454e-06	472.419	3.15806e-05	-1.1402e-05	475.729	3.51849e-07	-1.46776e-07	484.729	2.84724e-06	-7.47044e-07	475.649	3.06956e-05	-8.24063e-06	491.591	5.02642e-08	1.94959e-08	457.072	2.24801e-07	-9.69363e-08	482.965	3.61122e-08	-1.58913e-08	470.137	1.47408e-05	-4.39494e-06	470.937	0.00434793	-0.00104781
463.701	1.15339e-06	-4.05513e-07	471.134	1.08438e-05	-3.42268e-06	472.706	2.85978e-05	-1.038e-05	476.04	3.11445e-07	-1.30116e-07	485.032	2.63704e-06	-6.93465e-07	475.953	2.83673e-05	-7.67156e-06	491.889	5.68087e-08	2.19621e-08	457.364	1.99684e-07	-8.59311e-08	483.274	3.18354e-08	-1.38455e-08	470.425	1.35678e-05	-4.0675e-06	471.211	0.00407713	-0.00098979
464.001	1.04302e-06	-3.68069e-07	471.423	9.93148e-06	-3.15198e-06	472.994	2.58837e-05	-9.44459e-06	476.35	2.75662e-07	-1.15238e-07	485.335	2.44192e-06	-6.43713e-07	476.256	2.62012e-05	-7.1372e-06	492.187	6.41761e-08	2.47235e-08	457.657	1.77449e-07	-7.60696e-08	483.583	2.81207e-08	-1.2026e-08	470.714	1.24826e-05	-3.76259e-06	471.484	0.00382146	-0.000934516
464.301	9.42914e-07	-3.33847e-07	471.713	9.09183e-06	-2.90104e-06	473.281	2.34155e-05	-8.589e-06	476.661	2.44003e-07	-1.01953e-07	485.638	2.26081e-06	-5.97508e-07	476.56	2.41872e-05	-6.63578e-06	492.485	7.24645e-08	2.7814e-08	457.949	1.57798e-07	-6.72298e-08	483.892	2.49067e-08	-1.04047e-08	471.002	1.14794e-05	-3.47879e-06	471.758	0.00358018	-0.000881884
464.601	8.52184e-07	-3.02578e-07	472.002	8.31948e-06	-2.66852e-06	473.568	2.11721e-05	-7.80682e-06	476.971	2.16029e-07	-9.00883e-08	485.941	2.09271e-06	-5.5459e-07	476.863	2.2316e-05	-6.16558e-06	492.783	8.17829e-08	3.12708e-08	458.241	1.40465e-07	-5.93015e-08	484.201	2.21402e-08	-8.95625e-09	471.29	1.05522e-05	-3.21474e-06	472.031	0.00335261	-0.000831799
464.9	7.70019e-07	-2.74012e-07	472.292	7.60945e-06	-2.45317e-06	473.856	1.91341e-05	-7.09214e-06	477.282	1.91345e-07	-7.94904e-08	486.245	1.93669e-06	-5.1472e-07	477.167	2.05785e-05	-5.72493e-06	493.081	9.2253e-08	3.51355e-08	458.533	1.25212e-07	-5.21845e-08	484.51	1.97747e-08	-7.65785e-09	471.579	9.69593e-06	-2.96918e-06	472.305	0.00313807	-0.000784164
465.2	6.95678e-07	-2.47919e-07	472.581	6.95713e-06	-2.25382e-06	474.143	1.72836e-05	-6.43951e-06	477.592	1.69603e-07	-7.00195e-08	486.548	1.7919e-06	-4.77676e-07	477.47	1.89662e-05	-5.31224e-06	493.379	1.0401e-07	3.94538e-08	458.826	1.11828e-07	-4.57882e-08	484.819	1.77704e-08	-6.4888e-09	471.867	8.90546e-06	-2.74091e-06	472.578	0.00293592	-0.000738886
465.5	6.28485e-07	-2.24085e-07	472.871	6.35819e-06	-2.06936e-06	474.43	1.56043e-05	-5.84386e-06	477.903	1.5049e-07	-6.15495e-08	486.851	1.65755e-06	-4.43256e-07	477.774	1.74712e-05	-4.92597e-06	493.677	1.17204e-07	4.42763e-08	459.118	1.00127e-07	-4.00304e-08	485.127	1.6093e-08	-5.43032e-09	472.156	8.17616e-06	-2.52878e-06	472.852	0.00274554	-0.000695873
465.8	5.67819e-07	-2.02313e-07	473.16	5.80864e-06	-1.89873e-06	474.718	1.40811e-05	-5.30053e-06	478.213	1.33733e-07	-5.39665e-08	487.154	1.53288e-06	-4.11269e-07	478.077	1.60859e-05	-4.56465e-06	493.975	1.32002e-07	4.96589e-08	459.41	8.99447e-08	-3.48364e-08	485.436	1.47137e-08	-4.46527e-09	472.444	7.50369e-06	-2.33175e-06	473.126	0.00256633	-0.000655035
466.1	5.13119e-07	-1.8242e-07	473.45	5.30475e-06	-1.74098e-06	475.005	1.27003e-05	-4.80518e-06	478.524	1.19086e-07	-4.71675e-08	487.457	1.41723e-06	-3.81542e-07	478.381	1.4803e-05	-4.22685e-06	494.273	1.48589e-07	5.56631e-08	459.703	8.11355e-08	-3.01382e-08	485.745	1.36085e-08	-3.57793e-09	472.732	6.88399e-06	-2.14879e-06	473.399	0.00239772	-0.000616286
466.4	4.63871e-07	-1.64236e-07	473.739	4.84306e-06	-1.59517e-06	475.293	1.14491e-05	-4.35383e-06	478.834	1.06336e-07	-4.10592e-08	487.76	1.30996e-06	-3.53913e-07	478.684	1.3616e-05	-3.91123e-06	494.571	1.67171e-07	6.23569e-08	459.995	7.35727e-08	-2.58739e-08	486.054	1.27579e-08	-2.75373e-09	473.021	6.31326e-06	-1.97896e-06	473.673	0.00223916	-0.000579539
466.7	4.19611e-07	-1.47606e-07	474.028	4.42036e-06	-1.46044e-06	475.58	1.03161e-05	-3.94279e-06	479.145	9.52951e-08	-3.55569e-08	488.063	1.21047e-06	-3.28233e-07	478.988	1.25184e-05	-3.61648e-06	494.869	1.87975e-07	6.98151e-08	460.287	6.7146e-08	-2.19868e-08	486.363	1.21466e-08	-1.9791e-09	473.309	5.78798e-06	-1.82137e-06	473.946	0.00209013	-0.00054471
466.999	3.79915e-07	-1.32382e-07	474.318	4.03369e-06	-1.33597e-06	475.867	9.2906e-06	-3.56867e-06	479.455	8.57983e-08	-3.05835e-08	488.366	1.11821e-06	-3.04365e-07	479.291	1.15043e-05	-3.34135e-06	495.167	2.11254e-07	7.81203e-08	460.58	6.17605e-08	-1.84249e-08	486.672	1.17631e-08	-1.24124e-09	473.598	5.30486e-06	-1.67518e-06	474.22	0.00195013	-0.000511718
467.299	3.44402e-07	-1.1843e-07	474.607	3.68029e-06	-1.22102e-06	476.155	8.36288e-06	-3.22834e-06	479.766	7.77033e-08	-2.60689e-08	488.669	1.03268e-06	-2.8218e-07	479.595	1.05681e-05	-3.08465e-06	495.465	2.37288e-07	8.73631e-08	460.872	5.73351e-08	-1.51404e-08	486.981	1.16e-08	-5.27982e-10	473.886	4.86084e-06	-1.5396e-06	474.494	0.00181868	-0.000480485
467.599	3.1273e-07	-1.05625e-07	474.897	3.35762e-06	-1.11486e-06	476.442	7.52409e-06	-2.91892e-06	480.076	7.08878e-08	-2.19486e-08	488.973	9.53397e-07	-2.6156e-07	479.898	9.7046e-06	-2.84524e-06	495.763	2.66385e-07	9.76434e-08	461.164	5.38015e-08	-1.20891e-08	487.29	1.16533e-08	1.72437e-10	474.174	4.45309e-06	-1.41387e-06	474.767	0.00169531	-0.000450933
467.899	2.84589e-07	-9.38483e-08	475.186	3.06332e-06	-1.01682e-06	476.729	6.76609e-06	-2.63775e-06	480.387	6.52476e-08	-1.81635e-08	489.276	8.79924e-07	-2.42395e-07	480.202	8.90882e-06	-2.62204e-06	496.061	2.98887e-07	1.09071e-07	461.456	5.11037e-08	-9.22965e-09	487.599	1.19225e-08	8.71495e-10	474.463	4.07895e-06	-1.2973e-06	475.041	0.00157958	-0.000422988
468.199	2.59703e-07	-8.29918e-08	475.476	2.79523e-06	-9.26268e-07	477.017	6.08148e-06	-2.38239e-06	480.697	6.06958e-08	-1.46587e-08	489.579	8.1185e-07	-2.24583e-07	480.505	8.17618e-06	-2.41399e-06	496.359	3.35172e-07	1.21766e-07	461.749	4.91969e-08	-6.52363e-09	487.907	1.24107e-08	1.58056e-09	474.751	3.73597e-06	-1.18923e-06	475.314	0.00147108	-0.000396577
468.499	2.37827e-07	-7.29528e-08	475.765	2.55135e-06	-8.42621e-07	477.304	5.46347e-06	-2.15059e-06	481.008	5.71611e-08	-1.13831e-08	489.882	7.48794e-07	-2.08031e-07	480.809	7.50238e-06	-2.22012e-06	496.657	3.75657e-07	1.35861e-07	462.041	4.80468e-08	-3.93461e-09	488.216	1.31246e-08	2.31107e-09	475.04	3.4219e-06	-1.08904e-06	475.588	0.00136941	-0.00037163
468.799	2.18746e-07	-6.36351e-08	476.054	2.32984e-06	-7.6532e-07	477.591	4.9059e-06	-1.9403e-06	481.318	5.45872e-08	-8.28907e-09	490.185	6.90399e-07	-1.9265e-07	481.112	6.88341e-06	-2.03946e-06	496.955	4.20803e-07	1.515e-07	462.333	4.76294e-08	-1.42796e-09	488.525	1.40744e-08	3.07464e-09	475.328	3.13462e-06	-9.96128e-07	475.862	0.00127418	-0.000348079
469.098	2.02269e-07	-5.49481e-08	476.344	2.12902e-06	-6.93844e-07	477.879	4.40312e-06	-1.74961e-06	481.629	5.29317e-08	-5.33108e-09	490.488	6.36336e-07	-1.78359e-07	481.416	6.31553e-06	-1.87112e-06	497.253	4.71117e-07	1.68844e-07	462.626	4.79304e-08	1.02955e-09	488.834	1.52739e-08	3.88327e-09	475.616	2.87219e-06	-9.09957e-07	476.135	0.00118502	-0.000325858
469.398	1.88234e-07	-4.68059e-08	476.633	1.94734e-06	-6.27704e-07	478.166	3.95001e-06	-1.5768e-06	481.94	5.2166e-08	-2.46584e-09	490.791	5.86298e-07	-1.65082e-07	481.719	5.79527e-06	-1.71423e-06	497.551	5.27159e-07	1.88065e-07	462.918	4.89447e-08	3.47015e-09	489.143	1.6741e-08	4.74947e-09	475.905	2.63282e-06	-8.30001e-07	476.409	0.00110161	-0.000304904
469.698	1.76502e-07	-3.9127e-08	476.923	1.7834e-06	-5.6644e-07	478.454	3.54187e-06	-1.42026e-06	482.25	5.22743e-08	3.48559e-10	491.094	5.39998e-07	-1.52749e-07	482.023	5.31939e-06	-1.56796e-06	497.849	5.89545e-07	2.09355e-07	463.21	5.06766e-08	5.9254e-09	489.452	1.84975e-08	5.68645e-09	476.193	2.41485e-06	-7.55772e-07	476.682	0.00102359	-0.000285156
469.998	1.66956e-07	-3.1833e-08	477.212	1.6359e-06	-5.09617e-07	478.741	3.17447e-06	-1.27854e-06	482.561	5.32534e-08	3.15306e-09	491.397	4.9717e-07	-1.41295e-07	482.326	4.88493e-06	-1.43153e-06	498.147	6.58953e-07	2.32922e-07	463.502	5.31397e-08	8.42656e-09	489.761	2.05696e-08	6.70826e-09	476.481	2.21678e-06	-6.86805e-07	476.956	0.000950663	-0.000266555
470.298	1.59505e-07	-2.48488e-08	477.502	1.50368e-06	-4.56827e-07	479.028	2.84391e-06	-1.15029e-06	482.871	5.51128e-08	5.98816e-09	491.701	4.57565e-07	-1.3066e-07	482.63	4.48912e-06	-1.30417e-06	498.445	7.36131e-07	2.58993e-07	463.795	5.63564e-08	1.10049e-08	490.07	2.29883e-08	7.83e-09	476.77	2.03721e-06	-6.22663e-07	477.229	0.000882527	-0.000249044
470.598	1.54077e-07	-1.81013e-08	477.791	1.38568e-06	-4.07684e-07	479.316	2.54669e-06	-1.0343e-06	483.182	5.78747e-08	8.89442e-09	492.004	4.20953e-07	-1.20786e-07	482.933	4.12942e-06	-1.18517e-06	498.743	8.21898e-07	2.87818e-07	464.087	6.03585e-08	1.3692e-08	490.379	2.57893e-08	9.06799e-09	477.058	1.87486e-06	-5.62933e-07	477.503	0.000818899	-0.000232567
470.898	1.50623e-07	-1.15191e-08	478.08	1.28096e-06	-3.61823e-07	479.603	2.2796e-06	-9.29443e-07	483.492	6.1574e-08	1.19129e-08	492.307	3.8712e-07	-1.1162e-07	483.237	3.80352e-06	-1.07383e-06	499.041	9.17157e-07	3.19668e-07	464.379	6.51873e-08	1.65203e-08	490.688	2.90141e-08	1.04399e-08	477.347	1.72858e-06	-5.07224e-07	477.777	0.00075951	-0.000217073
471.198	1.49114e-07	-5.03187e-09	478.37	1.18866e-06	-3.18899e-07	479.89	2.03974e-06	-8.34691e-07	483.803	6.62584e-08	1.50858e-08	492.61	3.55865e-07	-1.03115e-07	483.54	3.50928e-06	-9.69497e-07	499.339	1.0229e-06	3.5484e-07	464.672	7.08937e-08	1.95229e-08	490.996	3.27101e-08	1.19652e-08	477.635	1.59731e-06	-4.55163e-07	478.05	0.000704105	-0.000202512
471.497	1.49543e-07	1.43011e-09	478.659	1.10803e-06	-2.78581e-07	480.178	1.82447e-06	-7.4911e-07	484.113	7.19895e-08	1.84565e-08	492.913	3.27001e-07	-9.52238e-08	483.844	3.24477e-06	-8.71521e-07	499.637	1.1402e-06	3.93656e-07	464.964	7.75389e-08	2.27345e-08	491.305	3.69312e-08	1.3665e-08	477.923	1.4801e-06	-4.06399e-07	478.324	0.000652442	-0.000188833
471.797	1.51923e-07	7.93681e-09	478.949	1.03841e-06	-2.40558e-07	480.465	1.63141e-06	-6.71843e-07	484.424	7.8843e-08	2.20708e-08	493.216	3.00356e-07	-8.79045e-08	484.147	3.00826e-06	-7.7929e-07	499.935	1.27027e-06	4.36468e-07	465.256	8.51945e-08	2.61913e-08	491.614	4.17384e-08	1.55626e-08	478.212	1.37611e-06	-3.60595e-07	478.597	0.000604293	-0.000175992
472.097	1.56289e-07	1.45589e-08	479.238	9.79211e-07	-2.04528e-07	480.752	1.45839e-06	-6.02109e-07	484.734	8.69093e-08	2.59766e-08	493.519	2.75769e-07	-8.11172e-08	484.451	2.79818e-06	-6.92211e-07	500.233	1.41439e-06	4.8366e-07	465.549	9.39433e-08	2.99315e-08	491.923	4.72008e-08	1.76837e-08	478.5	1.28456e-06	-3.1743e-07	478.871	0.00055944	-0.000163942
472.397	1.62696e-07	2.13682e-08	479.528	9.29948e-07	-1.70206e-07	481.04	1.30344e-06	-5.39194e-07	485.045	9.62948e-08	3.02251e-08	493.822	2.53088e-07	-7.48251e-08	484.754	2.61313e-06	-6.09706e-07	500.531	1.57401e-06	5.35646e-07	465.841	1.0388e-07	3.39958e-08	492.232	5.33961e-08	2.00566e-08	478.789	1.20479e-06	-2.76597e-07	479.145	0.000517678	-0.000152642
472.697	1.71224e-07	2.84386e-08	479.817	8.90205e-07	-1.37312e-07	481.327	1.1648e-06	-4.8245e-07	485.355	1.07123e-07	3.48709e-08	494.126	2.32175e-07	-6.89938e-08	485.058	2.45191e-06	-5.31216e-07	500.829	1.75068e-06	5.9288e-07	466.133	1.15112e-07	3.84273e-08	492.541	6.04119e-08	2.27124e-08	479.077	1.13621e-06	-2.378e-07	479.418	0.000478814	-0.000142051
472.997	1.81972e-07	3.58464e-08	480.106	8.59647e-07	-1.0558e-07	481.615	1.04087e-06	-4.31282e-07	485.666	1.19535e-07	3.99729e-08	494.429	2.129e-07	-6.3591e-08	485.361	2.31345e-06	-4.56197e-07	501.126	1.94612e-06	6.55854e-07	466.425	1.2776e-07	4.32722e-08	492.85	6.8346e-08	2.56857e-08	479.365	1.07831e-06	-2.00755e-07	479.692	0.000442665	-0.00013213
473.297	1.95068e-07	4.36712e-08	480.396	8.38014e-07	-7.47466e-08	481.902	9.30187e-07	-3.85149e-07	485.976	1.33694e-07	4.55945e-08	494.732	1.95142e-07	-5.85868e-08	485.665	2.19688e-06	-3.84113e-07	501.424	2.1622e-06	7.25099e-07	466.718	1.4196e-07	4.85804e-08	493.159	7.73085e-08	2.90147e-08	479.654	1.03068e-06	-1.65186e-07	479.965	0.000409057	-0.000122841
473.596	2.10659e-07	5.19963e-08	480.685	8.25117e-07	-4.45574e-08	482.189	8.3146e-07	-3.4356e-07	486.287	1.4978e-07	5.18046e-08	495.035	1.78788e-07	-5.39533e-08	485.968	2.10145e-06	-3.1444e-07	501.722	2.40095e-06	8.01196e-07	467.01	1.57863e-07	5.44053e-08	493.468	8.74221e-08	3.27414e-08	479.942	9.92946e-07	-1.30824e-07	480.239	0.000377827	-0.000114149
473.896	2.28924e-07	6.09096e-08	480.975	8.20845e-07	-1.47605e-08	482.477	7.43507e-07	-3.06066e-07	486.597	1.68001e-07	5.86782e-08	495.338	1.63734e-07	-4.96643e-08	486.272	2.02659e-06	-2.46657e-07	502.02	2.6646e-06	8.84771e-07	467.302	1.75636e-07	6.08046e-08	493.776	9.88241e-08	3.69124e-08	480.231	9.64854e-07	-9.74081e-08	480.513	0.000348821	-0.000106019
474.196	2.50065e-07	7.05041e-08	481.264	8.25156e-07	1.48927e-08	482.764	6.6527e-07	-2.72257e-07	486.908	1.88587e-07	6.62967e-08	495.641	1.49883e-07	-4.56956e-08	486.575	1.97188e-06	-1.8025e-07	502.318	2.95559e-06	9.76502e-07	467.595	1.95465e-07	6.7841e-08	494.085	1.11668e-07	4.15793e-08	480.519	9.462e-07	-6.46804e-08	480.786	0.000321894	-9.84203e-05
474.496	2.74317e-07	8.08789e-08	481.554	8.38079e-07	4.46502e-08	483.051	5.95796e-07	-2.41761e-07	487.218	2.11799e-07	7.47495e-08	495.944	1.37145e-07	-4.20243e-08	486.879	1.93707e-06	-1.14705e-07	502.616	3.27656e-06	1.07712e-06	467.887	2.17557e-07	7.5582e-08	494.394	1.26124e-07	4.67989e-08	480.807	9.3686e-07	-3.23868e-08	481.06	0.00029691	-9.1321e-05
474.796	3.01946e-07	9.21396e-08	481.843	8.59716e-07	7.47598e-08	483.339	5.34231e-07	-2.1424e-07	487.529	2.37924e-07	8.41339e-08	496.247	1.25436e-07	-3.86293e-08	487.182	1.92204e-06	-4.95056e-08	502.914	3.63041e-06	1.18743e-06	468.179	2.4214e-07	8.41008e-08	494.703	1.42382e-07	5.2634e-08	481.096	9.36781e-07	-2.75068e-10	481.333	0.000273739	-8.46921e-05
475.096	3.33251e-07	1.044e-07	482.132	8.90243e-07	1.05471e-07	483.626	4.79809e-07	-1.89385e-07	487.839	2.67286e-07	9.45566e-08	496.55	1.14678e-07	-3.54908e-08	487.486	1.92686e-06	1.58677e-08	503.212	4.02026e-06	1.30828e-06	468.471	2.69462e-07	9.34771e-08	495.012	1.60654e-07	5.91542e-08	481.384	9.45982e-07	3.19065e-08	481.607	0.00025226	-7.85058e-05
475.396	3.68569e-07	1.17781e-07	482.422	9.29906e-07	1.37038e-07	483.913	4.31843e-07	-1.66914e-07	488.15	3.00243e-07	1.06134e-07	496.854	1.048e-07	-3.25902e-08	487.789	1.95173e-06	8.19423e-08	503.51	4.44955e-06	1.4406e-06	468.764	2.99802e-07	1.03797e-07	495.321	1.81176e-07	6.64359e-08	481.673	9.64558e-07	6.44104e-08	481.881	0.000232361	-7.27356e-05
475.695	4.08274e-07	1.32414e-07	482.711	9.79028e-07	1.69718e-07	484.201	3.89724e-07	-1.46571e-07	488.46	3.37193e-07	1.18995e-07	497.157	9.57338e-08	-2.99103e-08	488.093	1.99703e-06	1.49255e-07	503.808	4.92198e-06	1.58539e-06	469.056	3.33461e-07	1.15154e-07	495.63	2.04208e-07	7.45637e-08	481.961	9.92675e-07	9.74918e-08	482.154	0.000213933	-6.73563e-05
475.995	4.52785e-07	1.4844e-07	483.001	1.03801e-06	2.03775e-07	484.488	3.52906e-07	-1.28122e-07	488.771	3.78579e-07	1.33278e-07	497.46	8.74179e-08	-2.74349e-08	488.396	2.0633e-06	2.18356e-07	504.106	5.4416e-06	1.74373e-06	469.348	3.70772e-07	1.2765e-07	495.939	2.30041e-07	8.36305e-08	482.249	1.03057e-06	1.31409e-07	482.428	0.000196876	-6.23442e-05
476.295	5.02565e-07	1.66012e-07	483.29	1.10732e-06	2.39482e-07	484.776	3.20907e-07	-1.11353e-07	489.082	4.24889e-07	1.49137e-07	497.763	7.9795e-08	-2.51489e-08	488.7	2.15125e-06	2.89811e-07	504.404	6.01278e-06	1.91677e-06	469.641	4.12101e-07	1.41394e-07	496.248	2.58997e-07	9.37389e-08	482.538	1.07857e-06	1.66426e-07	482.701	0.000181096	-5.76767e-05
476.595	5.58128e-07	1.85295e-07	483.58	1.18753e-06	2.77119e-07	485.063	2.933e-07	-9.60695e-08	489.392	4.76666e-07	1.66741e-07	498.066	7.28118e-08	-2.30384e-08	489.003	2.26179e-06	3.64206e-07	504.702	6.64028e-06	2.10577e-06	469.933	4.57847e-07	1.56507e-07	496.556	2.91431e-07	1.05002e-07	482.826	1.13706e-06	2.02814e-07	482.975	0.000166505	-5.33324e-05
476.895	6.20039e-07	2.06468e-07	483.869	1.27927e-06	3.16979e-07	485.35	2.6971e-07	-8.20922e-08	489.703	5.34508e-07	1.86272e-07	498.369	6.64191e-08	-2.10899e-08	489.307	2.39598e-06	4.42148e-07	505	7.32926e-06	2.31207e-06	470.225	5.08448e-07	1.73117e-07	496.865	3.2774e-07	1.17543e-07	483.115	1.20652e-06	2.4085e-07	483.248	0.000153019	-4.9291e-05
477.195	6.88923e-07	2.29722e-07	484.158	1.38328e-06	3.59366e-07	485.638	2.49808e-07	-6.92574e-08	490.013	5.99075e-07	2.07933e-07	498.672	6.05717e-08	-1.92913e-08	489.61	2.55509e-06	5.24269e-07	505.298	8.0853e-06	2.53712e-06	470.518	5.64384e-07	1.91366e-07	497.174	3.68359e-07	1.315e-07	483.403	1.28751e-06	2.80823e-07	483.522	0.000140562	-4.55334e-05
477.495	7.65467e-07	2.55267e-07	484.448	1.50039e-06	4.04601e-07	485.925	2.33309e-07	-5.74145e-08	490.324	6.71098e-07	2.31942e-07	498.975	5.52275e-08	-1.7631e-08	489.914	2.7406e-06	6.11233e-07	505.596	8.91445e-06	2.78246e-06	470.81	6.26176e-07	2.11405e-07	497.483	4.13774e-07	1.47022e-07	483.691	1.38067e-06	3.23031e-07	483.796	0.00012906	-4.20416e-05
477.794	8.50426e-07	2.8333e-07	484.737	1.6315e-06	4.53016e-07	486.212	2.19968e-07	-4.64245e-08	490.634	7.5138e-07	2.5854e-07	499.278	5.0348e-08	-1.6098e-08	490.217	2.95418e-06	7.03735e-07	505.894	9.82325e-06	3.04976e-06	471.102	6.94398e-07	2.33399e-07	497.792	4.64517e-07	1.64274e-07	483.98	1.48674e-06	3.67786e-07	484.069	0.000118445	-3.87984e-05
478.094	9.44628e-07	3.14156e-07	485.027	1.77765e-06	5.04964e-07	486.5	2.09577e-07	-3.6159e-08	490.945	8.40807e-07	2.87991e-07	499.582	4.58976e-08	-1.46824e-08	490.521	3.19774e-06	8.02506e-07	506.192	1.08188e-05	3.34081e-06	471.394	7.69672e-07	2.57527e-07	498.101	5.21179e-07	1.83436e-07	484.268	1.60654e-06	4.15414e-07	484.343	0.000108654	-3.57876e-05
478.394	1.04898e-06	3.48009e-07	485.316	1.93997e-06	5.60816e-07	486.787	2.01962e-07	-2.64988e-08	491.255	9.40354e-07	3.20579e-07	499.885	4.18437e-08	-1.33745e-08	490.824	3.47341e-06	9.08317e-07	506.49	1.19087e-05	3.65751e-06	471.687	8.52678e-07	2.83981e-07	498.41	5.84412e-07	2.04706e-07	484.557	1.74101e-06	4.66255e-07	484.616	9.96269e-05	-3.29942e-05
478.694	1.16448e-06	3.85176e-07	485.606	2.1197e-06	6.20964e-07	487.074	1.96982e-07	-1.73327e-08	491.566	1.05109e-06	3.5662e-07	500.188	3.81562e-08	-1.21652e-08	491.128	3.78358e-06	1.02198e-06	506.788	1.31012e-05	4.00191e-06	471.979	9.44158e-07	3.12971e-07	498.719	6.54933e-07	2.28301e-07	484.845	1.89117e-06	5.2067e-07	484.89	9.13087e-05	-3.04037e-05
478.994	1.29221e-06	4.25969e-07	485.895	2.3182e-06	6.85823e-07	487.362	1.94523e-07	-8.55665e-09	491.876	1.1742e-06	3.96452e-07	500.491	3.4808e-08	-1.10463e-08	491.431	4.1309e-06	1.14437e-06	507.086	1.44053e-05	4.37621e-06	472.271	1.04492e-06	3.4472e-07	499.028	7.33534e-07	2.54459e-07	485.133	2.05816e-06	5.79034e-07	485.164	8.36475e-05	-2.80027e-05
479.294	1.43336e-06	4.70723e-07	486.184	2.53696e-06	7.55832e-07	487.649	1.94502e-07	-7.24114e-11	492.187	1.31097e-06	4.40449e-07	500.794	3.1774e-08	-1.00095e-08	491.735	4.51828e-06	1.2764e-06	507.384	1.58305e-05	4.78274e-06	472.564	1.15584e-06	3.79474e-07	499.337	8.21086e-07	2.83439e-07	485.422	2.24324e-06	6.41748e-07	485.437	7.65947e-05	-2.57784e-05
479.594	1.58923e-06	5.19801e-07	486.474	2.77761e-06	8.31458e-07	487.937	1.96862e-07	8.21308e-09	492.497	1.46282e-06	4.89014e-07	501.097	2.90316e-08	-9.04745e-09	492.038	4.94895e-06	1.41903e-06	507.682	1.73872e-05	5.22399e-06	472.856	1.27787e-06	4.17494e-07	499.645	9.1855e-07	3.15525e-07	485.71	2.44778e-06	7.09231e-07	485.711	7.01055e-05	-2.37189e-05
479.893	1.76123e-06	5.73596e-07	486.763	3.04191e-06	9.13194e-07	488.224	2.01572e-07	1.63887e-08	492.808	1.6313e-06	5.42588e-07	501.4	2.65604e-08	-8.15277e-09	492.342	5.42644e-06	1.57331e-06	507.98	1.90866e-05	5.70264e-06	473.148	1.41205e-06	4.59064e-07	499.954	1.02698e-06	3.51026e-07	485.999	2.67329e-06	7.81929e-07	485.984	6.41377e-05	-2.1813e-05
480.193	1.95089e-06	6.3253e-07	487.053	3.3318e-06	1.00157e-06	488.511	2.08623e-07	2.45398e-08	493.118	1.81813e-06	6.01649e-07	501.703	2.4342e-08	-7.31859e-09	492.645	5.95463e-06	1.74033e-06	508.278	2.09405e-05	6.22153e-06	473.44	1.55951e-06	5.04489e-07	500.263	1.14754e-06	3.90281e-07	486.287	2.9214e-06	8.60313e-07	486.258	5.86522e-05	-2.005e-05
480.493	2.15991e-06	6.97062e-07	487.342	3.64934e-06	1.09713e-06	488.799	2.18034e-07	3.27494e-08	493.429	2.02516e-06	6.66716e-07	502.006	2.23602e-08	-6.53827e-09	492.949	6.53773e-06	1.92127e-06	508.576	2.2962e-05	6.78369e-06	473.733	1.72147e-06	5.54098e-07	500.572	1.28149e-06	4.33658e-07	486.575	3.1939e-06	9.44884e-07	486.532	5.36126e-05	-1.84201e-05
480.793	2.39011e-06	7.67684e-07	487.632	3.9968e-06	1.20048e-06	489.086	2.29845e-07	4.10981e-08	493.739	2.25443e-06	7.38354e-07	502.31	2.06005e-08	-5.80541e-09	493.252	7.18035e-06	2.11738e-06	508.874	2.51649e-05	7.39233e-06	474.025	1.89926e-06	6.08243e-07	500.881	1.43024e-06	4.8156e-07	486.864	3.49273e-06	1.03617e-06	486.805	4.89851e-05	-1.6914e-05
481.093	2.64347e-06	8.44928e-07	487.921	4.3766e-06	1.31225e-06	489.373	2.44117e-07	4.96658e-08	494.05	2.50818e-06	8.17174e-07	502.613	1.90504e-08	-5.11379e-09	493.556	7.88749e-06	2.32998e-06	509.172	2.7564e-05	8.05089e-06	474.317	2.09431e-06	6.67307e-07	501.19	1.59532e-06	5.34422e-07	487.152	3.81999e-06	1.13474e-06	487.079	4.47382e-05	-1.5523e-05
481.393	2.92215e-06	9.29365e-07	488.21	4.79139e-06	1.43311e-06	489.661	2.60937e-07	5.85314e-08	494.36	2.78884e-06	9.0384e-07	502.916	1.76994e-08	-4.45732e-09	493.859	8.66459e-06	2.56048e-06	509.47	3.01753e-05	8.76301e-06	474.61	2.30818e-06	7.31697e-07	501.499	1.77841e-06	5.92721e-07	487.441	4.17794e-06	1.24117e-06	487.352	4.08426e-05	-1.42388e-05
481.693	3.22849e-06	1.02161e-06	488.5	5.24399e-06	1.56375e-06	489.948	2.80413e-07	6.77739e-08	494.671	3.09908e-06	9.99069e-07	503.219	1.65384e-08	-3.83e-09	494.163	9.51754e-06	2.8104e-06	509.768	3.30159e-05	9.53255e-06	474.902	2.54255e-06	8.01852e-07	501.808	1.98135e-06	6.56974e-07	487.729	4.56904e-06	1.35612e-06	487.626	3.72711e-05	-1.30539e-05
481.992	3.56503e-06	1.12233e-06	488.789	5.73745e-06	1.70495e-06	490.235	3.02676e-07	7.7473e-08	494.981	3.44178e-06	1.10364e-06	503.522	1.55607e-08	-3.22587e-09	494.466	1.04527e-05	3.08134e-06	510.066	3.61041e-05	1.03636e-05	475.194	2.79926e-06	8.78243e-07	502.117	2.20614e-06	7.27743e-07	488.017	4.99594e-06	1.48024e-06	487.9	3.39987e-05	-1.19611e-05
482.292	3.93453e-06	1.23224e-06	489.079	6.27507e-06	1.8575e-06	490.523	3.2788e-07	8.77097e-08	495.292	3.82011e-06	1.21838e-06	503.825	1.47608e-08	-2.63893e-09	494.77	1.1477e-05	3.37501e-06	510.364	3.94597e-05	1.12605e-05	475.487	3.08027e-06	9.61376e-07	502.425	2.455e-06	8.05637e-07	488.306	5.46149e-06	1.61425e-06	488.173	3.10019e-05	-1.09537e-05
482.592	4.33996e-06	1.35209e-06	489.368	6.86037e-06	2.02225e-06	490.81	3.56205e-07	9.85664e-08	495.602	4.23752e-06	1.34422e-06	504.128	1.41354e-08	-2.06314e-09	495.073	1.25979e-05	3.69323e-06	510.662	4.31035e-05	1.22279e-05	475.779	3.3877e-06	1.05179e-06	502.734	2.73032e-06	8.91317e-07	488.594	5.96875e-06	1.75891e-06	488.447	2.8259e-05	-1.00255e-05
482.892	4.78457e-06	1.48272e-06	489.658	7.49715e-06	2.20011e-06	491.098	3.87852e-07	1.10128e-07	495.913	4.69775e-06	1.48212e-06	504.431	1.36831e-08	-1.49231e-09	495.377	1.38234e-05	4.03792e-06	510.96	4.70581e-05	1.32707e-05	476.071	3.72386e-06	1.15007e-06	503.043	3.03474e-06	9.855e-07	488.883	6.52104e-06	1.91501e-06	488.72	2.575e-05	-9.17051e-06
483.192	5.27184e-06	1.625e-06	489.947	8.18947e-06	2.39202e-06	491.385	4.23049e-07	1.22482e-07	496.223	5.20487e-06	1.63313e-06	504.734	1.34042e-08	-9.20067e-10	495.68	1.51622e-05	4.41115e-06	511.258	5.13473e-05	1.43939e-05	476.363	4.09122e-06	1.25682e-06	503.352	3.37111e-06	1.08896e-06	489.171	7.12189e-06	2.0834e-06	488.994	2.34564e-05	-8.38339e-06
483.492	5.80555e-06	1.77987e-06	490.236	8.94171e-06	2.59901e-06	491.672	4.6205e-07	1.3572e-07	496.534	5.76332e-06	1.79841e-06	505.038	1.33012e-08	-3.39779e-10	495.984	1.66235e-05	4.8151e-06	511.556	5.59969e-05	1.56031e-05	476.656	4.49246e-06	1.37272e-06	503.661	3.74257e-06	1.20254e-06	489.459	7.7751e-06	2.26499e-06	489.267	2.1361e-05	-7.65902e-06
483.792	6.38978e-06	1.94834e-06	490.526	9.75852e-06	2.82215e-06	491.96	5.05136e-07	1.49936e-07	496.845	6.37789e-06	1.97917e-06	505.341	1.33786e-08	2.55513e-10	496.287	1.82175e-05	5.25209e-06	511.854	6.10341e-05	1.69038e-05	476.948	4.93046e-06	1.49847e-06	503.97	4.15251e-06	1.32714e-06	489.748	8.48477e-06	2.46072e-06	489.541	1.94479e-05	-6.99266e-06
484.091	7.02893e-06	2.1315e-06	490.815	1.06449e-05	3.06257e-06	492.247	5.52618e-07	1.6523e-07	497.155	7.05381e-06	2.17672e-06	505.644	1.36433e-08	8.73166e-10	496.591	1.99549e-05	5.72458e-06	512.152	6.6488e-05	1.83023e-05	477.24	5.40831e-06	1.63483e-06	504.279	4.60465e-06	1.46374e-06	490.036	9.25525e-06	2.6716e-06	489.815	1.77024e-05	-6.37987e-06
484.391	7.72774e-06	2.3305e-06	491.105	1.16063e-05	3.32147e-06	492.534	6.04834e-07	1.81706e-07	497.466	7.79673e-06	2.39249e-06	505.947	1.41043e-08	1.52102e-09	496.894	2.18473e-05	6.23518e-06	512.45	7.23897e-05	1.98048e-05	477.533	5.92936e-06	1.7826e-06	504.588	5.10302e-06	1.6134e-06	490.325	1.00912e-05	2.8987e-06	490.088	1.61111e-05	-5.81654e-06
484.691	8.49135e-06	2.54657e-06	491.394	1.26482e-05	3.60012e-06	492.822	6.62156e-07	1.99473e-07	497.776	8.61278e-06	2.628e-06	506.25	1.47735e-08	2.2075e-09	497.198	2.3907e-05	6.78665e-06	512.748	7.87721e-05	2.14181e-05	477.825	6.49718e-06	1.94264e-06	504.897	5.65201e-06	1.77727e-06	490.613	1.09977e-05	3.14314e-06	490.362	1.46613e-05	-5.29883e-06
484.991	9.32527e-06	2.78102e-06	491.684	1.3777e-05	3.89987e-06	493.109	7.24987e-07	2.18647e-07	498.087	9.50859e-06	2.88486e-06	506.553	1.56651e-08	2.94166e-09	497.501	2.61474e-05	7.38193e-06	513.046	8.56704e-05	2.31492e-05	478.117	7.11563e-06	2.11586e-06	505.206	6.25638e-06	1.95656e-06	490.901	1.198e-05	3.40611e-06	490.635	1.33418e-05	-4.82317e-06
485.291	1.02354e-05	3.03527e-06	491.973	1.4999e-05	4.22212e-06	493.397	7.93767e-07	2.39349e-07	498.397	1.04913e-05	3.16484e-06	506.856	1.67967e-08	3.73337e-09	497.805	2.85827e-05	8.02411e-06	513.344	9.31218e-05	2.50054e-05	478.409	7.78886e-06	2.30323e-06	505.514	6.92131e-06	2.15259e-06	491.19	1.30439e-05	3.68886e-06	490.909	1.21417e-05	-4.38623e-06
485.591	1.12282e-05	3.31081e-06	492.263	1.63212e-05	4.56837e-06	493.684	8.68973e-07	2.61707e-07	498.708	1.15688e-05	3.4698e-06	507.159	1.8189e-08	4.59336e-09	498.108	3.12281e-05	8.71646e-06	513.642	0.000101166	2.69945e-05	478.702	8.52129e-06	2.5058e-06	505.823	7.6524e-06	2.3668e-06	491.478	1.41954e-05	3.99273e-06	491.183	1.10515e-05	-3.98492e-06
485.891	1.23105e-05	3.60922e-06	492.552	1.77511e-05	4.9402e-06	493.971	9.51119e-07	2.85859e-07	499.018	1.27493e-05	3.80175e-06	507.462	1.98663e-08	5.53335e-09	498.412	3.41e-05	9.46245e-06	513.94	0.000109845	2.91246e-05	478.994	9.31769e-06	2.72465e-06	506.132	8.45574e-06	2.60071e-06	491.767	1.5441e-05	4.31911e-06	491.456	1.00621e-05	-3.61638e-06
486.19	1.34896e-05	3.93221e-06	492.841	1.92964e-05	5.33924e-06	494.259	1.04076e-06	3.11947e-07	499.329	1.4042e-05	4.16282e-06	507.766	2.18566e-08	6.56624e-09	498.715	3.72156e-05	1.02657e-05	514.238	0.000119203	3.14042e-05	479.286	1.01832e-05	2.96095e-06	506.441	9.33793e-06	2.85595e-06	492.055	1.67877e-05	4.66946e-06	491.73	9.1653e-06	-3.27794e-06
486.49	1.47734e-05	4.28156e-06	493.131	2.09656e-05	5.76725e-06	494.546	1.1385e-06	3.40125e-07	499.639	1.54565e-05	4.55531e-06	508.069	2.41924e-08	7.70619e-09	499.019	4.05935e-05	1.11301e-05	514.536	0.000129288	3.38423e-05	479.579	1.11232e-05	3.21595e-06	506.75	1.03061e-05	3.13429e-06	492.343	1.82427e-05	5.04534e-06	492.003	8.35352e-06	-2.96711e-06
486.79	1.61705e-05	4.6592e-06	493.42	2.27676e-05	6.22606e-06	494.833	1.24499e-06	3.70553e-07	499.95	1.70034e-05	4.98165e-06	508.372	2.6911e-08	8.96883e-09	499.322	4.42536e-05	1.20597e-05	514.834	0.000140149	3.6448e-05	479.871	1.21436e-05	3.49093e-06	507.059	1.1368e-05	3.43762e-06	492.632	1.9814e-05	5.44836e-06	492.277	7.61986e-06	-2.68161e-06
487.09	1.76899e-05	5.06714e-06	493.71	2.47119e-05	6.71757e-06	495.121	1.36091e-06	4.03404e-07	500.26	1.8694e-05	5.44445e-06	508.675	3.00547e-08	1.03714e-08	499.626	4.82169e-05	1.30587e-05	515.132	0.000151839	3.92311e-05	480.163	1.32506e-05	3.78731e-06	507.368	1.25319e-05	3.76795e-06	492.92	2.15099e-05	5.88025e-06	492.551	6.95797e-06	-2.41928e-06
487.39	1.93414e-05	5.50753e-06	493.999	2.68085e-05	7.24382e-06	495.408	1.48702e-06	4.38857e-07	500.571	2.05405e-05	5.94647e-06	508.978	3.36717e-08	1.1933e-08	499.929	5.25058e-05	1.41317e-05	515.43	0.000164415	4.22016e-05	480.456	1.44509e-05	4.10653e-06	507.677	1.38068e-05	4.12744e-06	493.209	2.33391e-05	6.34278e-06	492.824	6.36205e-06	-2.17816e-06
487.69	2.11354e-05	5.98266e-06	494.289	2.90681e-05	7.8069e-06	495.695	1.62412e-06	4.77106e-07	500.881	2.2556e-05	6.49067e-06	509.281	3.78167e-08	1.36747e-08	500.233	5.71442e-05	1.52833e-05	515.728	0.000177935	4.537e-05	480.748	1.57516e-05	4.45015e-06	507.986	1.52025e-05	4.51841e-06	493.497	2.53111e-05	6.83785e-06	493.098	5.8268e-06	-1.9564e-06
487.99	2.30829e-05	6.49491e-06	494.578	3.15019e-05	8.40902e-06	495.983	1.77308e-06	5.18353e-07	501.192	2.47546e-05	7.08018e-06	509.584	4.25513e-08	1.562e-08	500.536	6.21575e-05	1.65184e-05	516.026	0.000192461	4.87474e-05	481.04	1.71604e-05	4.8198e-06	508.294	1.67295e-05	4.94332e-06	493.785	2.74359e-05	7.36742e-06	493.371	5.34739e-06	-1.75229e-06
488.289	2.5196e-05	7.04685e-06	494.867	3.4122e-05	9.05251e-06	496.27	1.93481e-06	5.62813e-07	501.502	2.71513e-05	7.71833e-06	509.887	4.79451e-08	1.77947e-08	500.84	6.75726e-05	1.78423e-05	516.324	0.00020806	5.23449e-05	481.332	1.86854e-05	5.21722e-06	508.603	1.8399e-05	5.40481e-06	494.074	2.97239e-05	7.93357e-06	493.645	4.91942e-06	-1.56426e-06
488.589	2.74873e-05	7.64114e-06	495.157	3.69409e-05	9.73978e-06	496.558	2.11031e-06	6.10714e-07	501.813	2.97623e-05	8.40865e-06	510.19	5.40763e-08	2.02275e-08	501.143	7.34181e-05	1.92604e-05	516.622	0.000224799	5.61744e-05	481.625	2.03352e-05	5.64422e-06	508.912	2.02232e-05	5.90568e-06	494.362	3.21864e-05	8.53843e-06	493.918	4.53891e-06	-1.39083e-06
488.889	2.99703e-05	8.28063e-06	495.446	3.99723e-05	1.04733e-05	496.845	2.30063e-06	6.62297e-07	502.123	3.26051e-05	9.15489e-06	510.494	6.10328e-08	2.29504e-08	501.447	7.97242e-05	2.07783e-05	516.92	0.000242753	6.02481e-05	481.917	2.2119e-05	6.10272e-06	509.221	2.22153e-05	6.44893e-06	494.651	3.48351e-05	9.18428e-06	494.192	4.20221e-06	-1.23064e-06
489.189	3.26595e-05	8.9683e-06	495.736	4.323e-05	1.12558e-05	497.132	2.50691e-06	7.17814e-07	502.434	3.56982e-05	9.96101e-06	510.797	6.89133e-08	2.59985e-08	501.75	8.65232e-05	2.2402e-05	517.218	0.000261996	6.45787e-05	482.209	2.40466e-05	6.59473e-06	509.53	2.43892e-05	7.03773e-06	494.939	3.76826e-05	9.87346e-06	494.466	3.90607e-06	-1.08243e-06
489.489	3.55703e-05	9.7073e-06	496.025	4.67293e-05	1.209e-05	497.42	2.73034e-06	7.77536e-07	502.744	3.90616e-05	1.08312e-05	511.1	7.78282e-08	2.94112e-08	502.054	9.38488e-05	2.41375e-05	517.516	0.000282611	6.9179e-05	482.502	2.61284e-05	7.12237e-06	509.839	2.67601e-05	7.67548e-06	495.227	4.0742e-05	1.06084e-05	494.739	3.64752e-06	-9.45017e-07
489.789	3.87191e-05	1.05009e-05	496.315	5.04857e-05	1.29787e-05	497.707	2.97223e-06	8.41745e-07	503.055	4.27164e-05	1.17699e-05	511.403	8.79011e-08	3.32316e-08	502.357	0.000101737	2.59915e-05	517.814	0.000304681	7.40627e-05	482.794	2.83755e-05	7.68788e-06	510.148	2.93442e-05	8.36576e-06	495.516	4.40274e-05	1.13918e-05	495.013	3.42392e-06	-8.17309e-07
490.089	4.21233e-05	1.13527e-05	496.604	5.4516e-05	1.39249e-05	497.994	3.23395e-06	9.10741e-07	503.365	4.66854e-05	1.27818e-05	511.706	9.92701e-08	3.75078e-08	502.661	0.000110226	2.79705e-05	518.112	0.000328295	7.92436e-05	483.086	3.07997e-05	8.29358e-06	510.457	3.2159e-05	9.11239e-06	495.804	4.75534e-05	1.22261e-05	495.286	3.23287e-06	-6.98292e-07
490.388	4.58014e-05	1.22661e-05	496.893	5.88377e-05	1.49317e-05	498.282	3.51696e-06	9.84837e-07	503.676	5.09929e-05	1.38719e-05	512.009	1.1209e-07	4.2293e-08	502.964	0.000119356	3.00816e-05	518.41	0.000353546	8.4736e-05	483.379	3.34134e-05	8.94192e-06	510.766	3.5223e-05	9.91942e-06	496.093	5.13355e-05	1.31142e-05	495.56	3.07227e-06	-5.87021e-07
490.688	4.97731e-05	1.32452e-05	497.183	6.34693e-05	1.60023e-05	498.569	3.82282e-06	1.06437e-06	503.987	5.56648e-05	1.50453e-05	512.312	1.26532e-07	4.7646e-08	503.268	0.000129169	3.2332e-05	518.708	0.00038053	9.05545e-05	483.671	3.62298e-05	9.63548e-06	511.075	3.85563e-05	1.07911e-05	496.381	5.53901e-05	1.4059e-05	495.834	2.94023e-06	-4.82614e-07
490.988	5.40592e-05	1.42939e-05	497.472	6.84301e-05	1.714e-05	498.856	4.15319e-06	1.14968e-06	504.297	6.07286e-05	1.63075e-05	512.615	1.42788e-07	5.3632e-08	503.571	0.000139709	3.47291e-05	519.006	0.00040935	9.67144e-05	483.963	3.92629e-05	1.03769e-05	511.383	4.21803e-05	1.1732e-05	496.669	5.97343e-05	1.50634e-05	496.107	2.8351e-06	-3.8425e-07
491.288	5.8682e-05	1.54163e-05	497.762	7.37407e-05	1.83483e-05	499.144	4.50985e-06	1.24113e-06	504.608	6.62138e-05	1.76643e-05	512.918	1.61073e-07	6.03229e-08	503.875	0.000151023	3.72809e-05	519.304	0.000440112	0.000103231	484.255	4.25276e-05	1.11691e-05	511.692	4.61178e-05	1.27469e-05	496.958	6.43863e-05	1.61305e-05	496.381	2.75544e-06	-2.91162e-07
491.588	6.36647e-05	1.6617e-05	498.051	7.94224e-05	1.96306e-05	499.431	4.89467e-06	1.33913e-06	504.918	7.21515e-05	1.91216e-05	513.222	1.81623e-07	6.77983e-08	504.178	0.000163162	3.99952e-05	519.602	0.000472927	0.00011012	484.548	4.60395e-05	1.20148e-05	512.001	5.03931e-05	1.38409e-05	497.246	6.93651e-05	1.72636e-05	496.654	2.70001e-06	-2.02631e-07
491.888	6.90323e-05	1.79004e-05	498.341	8.54977e-05	2.09907e-05	499.719	5.30964e-06	1.44406e-06	505.229	7.85749e-05	2.0686e-05	513.525	2.04704e-07	7.6146e-08	504.482	0.000176176	4.28806e-05	519.9	0.000507911	0.000117398	484.84	4.98151e-05	1.29172e-05	512.31	5.50325e-05	1.50193e-05	497.535	7.46906e-05	1.84659e-05	496.928	2.66773e-06	-1.17985e-07
492.188	7.48109e-05	1.92713e-05	498.63	9.19903e-05	2.24323e-05	500.006	5.75688e-06	1.55635e-06	505.539	8.55194e-05	2.23639e-05	513.828	2.30609e-07	8.5463e-08	504.785	0.00019012	4.59454e-05	520.198	0.000545184	0.000125081	485.132	5.3872e-05	1.38795e-05	512.619	6.00637e-05	1.62877e-05	497.823	8.03838e-05	1.97408e-05	497.202	2.65771e-06	-3.6592e-08
492.487	8.10284e-05	2.07347e-05	498.919	9.89249e-05	2.39594e-05	500.293	6.23864e-06	1.67645e-06	505.85	9.30223e-05	2.41625e-05	514.131	2.59664e-07	9.58563e-08	505.089	0.000205052	4.91986e-05	520.496	0.000584872	0.000133186	485.425	5.82287e-05	1.4905e-05	512.928	6.55163e-05	1.7652e-05	498.111	8.64667e-05	2.1092e-05	497.475	2.66924e-06	4.21441e-08
492.787	8.7714e-05	2.22959e-05	499.209	0.000106327	2.55759e-05	500.581	6.75728e-06	1.80483e-06	506.16	0.000101123	2.60888e-05	514.434	2.92232e-07	1.07444e-07	505.392	0.000221031	5.26493e-05	520.794	0.000627106	0.00014173	485.717	6.29045e-05	1.5997e-05	513.237	7.14219e-05	1.91185e-05	498.4	9.29622e-05	2.25229e-05	497.749	2.70174e-06	1.18785e-07
493.087	9.48987e-05	2.39601e-05	499.498	0.000114225	2.7286e-05	500.868	7.31533e-06	1.94196e-06	506.471	0.000109865	2.81506e-05	514.737	3.28713e-07	1.20355e-07	505.696	0.00023812	5.63068e-05	521.092	0.000672022	0.00015073	486.009	6.79201e-05	1.71593e-05	513.546	7.7814e-05	2.06936e-05	498.688	9.98946e-05	2.40374e-05	498.022	2.75478e-06	1.93862e-07
493.387	0.000102615	2.57331e-05	499.788	0.000122645	2.9094e-05	501.155	7.91546e-06	2.08837e-06	506.781	0.000119291	3.03557e-05	515.04	3.69552e-07	1.34734e-07	505.999	0.000256384	6.01807e-05	521.39	0.000719762	0.000160204	486.301	7.3297e-05	1.83954e-05	513.855	8.47284e-05	2.23844e-05	498.977	0.000107289	2.56393e-05	498.296	2.82807e-06	2.67882e-07
493.687	0.000110897	2.76205e-05	500.077	0.000131619	3.10041e-05	501.443	8.56047e-06	2.24457e-06	507.092	0.000129449	3.27124e-05	515.343	4.15242e-07	1.50737e-07	506.303	0.000275893	6.42809e-05	521.688	0.000770471	0.00017017	486.594	7.90579e-05	1.97093e-05	514.163	9.2203e-05	2.41979e-05	499.265	0.000115172	2.73325e-05	498.57	2.92146e-06	3.41325e-07
493.987	0.000119782	2.96285e-05	500.367	0.000141176	3.30207e-05	501.73	9.25334e-06	2.41113e-06	507.402	0.000140388	3.52292e-05	515.646	4.66328e-07	1.68537e-07	506.606	0.000296719	6.86173e-05	521.986	0.000824301	0.000180645	486.886	8.52268e-05	2.11048e-05	514.472	0.000100278	2.61417e-05	499.553	0.00012357	2.91211e-05	498.843	3.0349e-06	4.14653e-07
494.287	0.000129306	3.17631e-05	500.656	0.000151349	3.51485e-05	502.017	9.99722e-06	2.58862e-06	507.713	0.000152162	3.79152e-05	515.95	5.23412e-07	1.88325e-07	506.91	0.000318935	7.32002e-05	522.284	0.00088141	0.000191647	487.178	9.18286e-05	2.25862e-05	514.781	0.000108996	2.82236e-05	499.842	0.000132513	3.10092e-05	499.117	3.1685e-06	4.88307e-07
494.586	0.000139511	3.4031e-05	500.945	0.000162172	3.73921e-05	502.305	1.07954e-05	2.77764e-06	508.023	0.000164825	4.07794e-05	516.253	5.87159e-07	2.10309e-07	507.213	0.00034262	7.80401e-05	522.582	0.000941961	0.000203195	487.471	9.88898e-05	2.41577e-05	515.09	0.000118403	3.0452e-05	500.13	0.00014203	3.3001e-05	499.39	3.32245e-06	5.62713e-07
494.886	0.000150437	3.64386e-05	501.235	0.000173678	3.97561e-05	502.592	1.16514e-05	2.97883e-06	508.334	0.000178435	4.38316e-05	516.556	6.58305e-07	2.34718e-07	507.517	0.000367855	8.31476e-05	522.88	0.00100612	0.000215306	487.763	0.000106438	2.58235e-05	515.399	0.000128545	3.28353e-05	500.419	0.000152153	3.51009e-05	499.664	3.49708e-06	6.38286e-07
495.186	0.000162129	3.89928e-05	501.524	0.000185905	4.22454e-05	502.88	1.25689e-05	3.19282e-06	508.644	0.000193055	4.70816e-05	516.859	7.3766e-07	2.61802e-07	507.82	0.000394724	8.85334e-05	523.178	0.00107406	0.000227999	488.055	0.000114502	2.75884e-05	515.708	0.000139475	3.53825e-05	500.707	0.000162914	3.73131e-05	499.937	3.69281e-06	7.15424e-07
495.486	0.000174634	4.17007e-05	501.814	0.000198891	4.48648e-05	503.167	1.35518e-05	3.42029e-06	508.955	0.000208749	5.05396e-05	517.162	8.2612e-07	2.91838e-07	508.124	0.000423316	9.42085e-05	523.476	0.00114596	0.00024129	488.348	0.000123112	2.94567e-05	516.017	0.000151244	3.81029e-05	500.995	0.000174347	3.96423e-05	500.211	3.91018e-06	7.94521e-07
495.786	0.000187998	4.45695e-05	502.103	0.000212673	4.76192e-05	503.454	1.46041e-05	3.66194e-06	509.265	0.000225584	5.42163e-05	517.465	9.24669e-07	3.25125e-07	508.427	0.000453722	0.000100184	523.774	0.00122201	0.000255199	488.64	0.0001323	3.14334e-05	516.326	0.000163911	4.10063e-05	501.284	0.000186487	4.20928e-05	500.485	4.14984e-06	8.75959e-07
496.086	0.000202273	4.76066e-05	502.393	0.000227293	5.05137e-05	503.742	1.57302e-05	3.91849e-06	509.576	0.000243632	5.81226e-05	517.768	1.03439e-06	3.61994e-07	508.731	0.000486035	0.000106471	524.072	0.00130239	0.000269743	488.932	0.000142098	3.35234e-05	516.635	0.000177534	4.41025e-05	501.572	0.000199369	4.46694e-05	500.758	4.41251e-06	9.60117e-07
496.386	0.000217512	5.08195e-05	502.682	0.000242793	5.35532e-05	504.029	1.69344e-05	4.1907e-06	509.886	0.000262968	6.22695e-05	518.071	1.15649e-06	4.02804e-07	509.034	0.000520355	0.00011308	524.37	0.0013873	0.000284938	489.224	0.000152543	3.57315e-05	516.944	0.000192176	4.74021e-05	501.861	0.000213033	4.73766e-05	501.032	4.69906e-06	1.04737e-06
496.685	0.000233769	5.42161e-05	502.971	0.000259216	5.67429e-05	504.316	1.82216e-05	4.47933e-06	510.197	0.00028367	6.66687e-05	518.374	1.29227e-06	4.47949e-07	509.338	0.000556782	0.000120023	524.668	0.00147694	0.000300802	489.517	0.000163668	3.80629e-05	517.252	0.000207904	5.09159e-05	502.149	0.000227516	5.02192e-05	501.305	5.01043e-06	1.13808e-06
496.985	0.000251102	5.78042e-05	503.261	0.000276608	6.00878e-05	504.604	1.95967e-05	4.78518e-06	510.507	0.00030582	7.13319e-05	518.678	1.44317e-06	4.97858e-07	509.641	0.00059542	0.000127312	524.966	0.00157151	0.000317352	489.809	0.000175513	4.05228e-05	517.561	0.000224787	5.46549e-05	502.437	0.000242859	5.32018e-05	501.579	5.34767e-06	1.23263e-06
497.285	0.000269571	6.1592e-05	503.55	0.000295014	6.35931e-05	504.891	2.10649e-05	5.10908e-06	510.818	0.000329504	7.62712e-05	518.981	1.6108e-06	5.53e-07	509.945	0.000636379	0.000134957	525.264	0.00167121	0.000334602	490.101	0.000188116	4.31166e-05	517.87	0.000242897	5.86306e-05	502.726	0.000259104	5.63292e-05	501.853	5.71192e-06	1.33139e-06
497.585	0.000289238	6.55877e-05	503.84	0.000314482	6.72638e-05	505.178	2.26316e-05	5.45188e-06	511.129	0.000354811	8.14988e-05	519.284	1.79687e-06	6.13884e-07	510.248	0.00067977	0.000142969	525.562	0.00177628	0.00035257	490.394	0.000201517	4.58496e-05	518.179	0.000262313	6.2855e-05	503.014	0.000276294	5.96062e-05	502.126	6.10445e-06	1.43472e-06
497.885	0.000310168	6.97996e-05	504.129	0.000335062	7.1105e-05	505.466	2.43024e-05	5.81443e-06	511.439	0.000381835	8.70275e-05	519.587	2.00331e-06	6.81068e-07	510.552	0.000725707	0.00015136	525.86	0.00188691	0.00037127	490.686	0.00021576	4.87274e-05	518.488	0.000283114	6.73403e-05	503.302	0.000294474	6.30375e-05	502.4	6.5266e-06	1.54299e-06
498.185	0.000332429	7.42361e-05	504.419	0.000356804	7.51219e-05	505.753	2.60834e-05	6.19764e-06	511.75	0.000410673	9.28699e-05	519.89	2.23221e-06	7.55157e-07	510.855	0.000774309	0.00016014	526.158	0.00200334	0.000390715	490.978	0.000230888	5.17554e-05	518.797	0.000305385	7.20989e-05	503.591	0.00031369	6.66279e-05	502.673	6.97982e-06	1.6566e-06
498.485	0.000356089	7.89059e-05	504.708	0.000379762	7.93194e-05	506.041	2.79807e-05	6.60243e-06	512.06	0.000441427	9.90391e-05	520.193	2.48586e-06	8.36809e-07	511.159	0.000825697	0.00016932	526.456	0.00212579	0.00041092	491.27	0.000246946	5.49394e-05	519.106	0.000329214	7.71438e-05	503.879	0.000333988	7.03822e-05	502.947	7.4657e-06	1.77591e-06
498.784	0.000381223	8.38175e-05	504.997	0.000403988	8.37025e-05	506.328	3.00008e-05	7.02972e-06	512.371	0.000474202	0.000105548	520.496	2.76676e-06	9.26739e-07	511.462	0.000879996	0.000178911	526.754	0.00225449	0.000431896	491.563	0.000263983	5.8285e-05	519.415	0.000354694	8.24881e-05	504.168	0.000355417	7.43049e-05	503.221	7.98588e-06	1.90132e-06
499.084	0.000407904	8.89797e-05	505.287	0.000429538	8.82762e-05	506.615	3.21504e-05	7.48049e-06	512.681	0.000509108	0.000112411	520.799	3.07767e-06	1.02573e-06	511.766	0.000937334	0.000188924	527.052	0.00238968	0.000453656	491.855	0.000282046	6.1798e-05	519.724	0.000381922	8.81453e-05	504.456	0.000378028	7.84008e-05	503.494	8.54215e-06	2.03323e-06
499.384	0.000436211	9.44012e-05	505.576	0.000456468	9.30451e-05	506.903	3.44366e-05	7.95572e-06	512.992	0.000546259	0.00011964	521.102	3.42159e-06	1.13461e-06	512.069	0.000997841	0.000199367	527.35	0.00253159	0.000476209	492.147	0.000301187	6.54841e-05	520.032	0.000410998	9.41292e-05	504.744	0.000401871	8.26744e-05	503.768	9.1364e-06	2.17203e-06
499.684	0.000466224	0.000100091	505.866	0.000484836	9.8014e-05	507.19	3.68667e-05	8.4564e-06	513.302	0.000585772	0.000127249	521.406	3.80178e-06	1.25431e-06	512.373	0.00106165	0.000210251	527.648	0.00268045	0.000499565	492.44	0.000321457	6.9349e-05	520.341	0.000442027	0.000100454	505.033	0.000426999	8.71302e-05	504.041	9.77062e-06	2.31815e-06
499.984	0.000498026	0.000106057	506.155	0.000514702	0.000103188	507.477	3.94483e-05	8.98356e-06	513.613	0.000627771	0.000135252	521.709	4.22184e-06	1.38582e-06	512.676	0.0011289	0.000221584	527.946	0.00283652	0.000523732	492.732	0.000342911	7.33987e-05	520.65	0.00047512	0.000107133	505.321	0.000453466	9.17726e-05	504.315	1.04469e-05	2.472e-06
500.284	0.000531703	0.000112309	506.445	0.000546125	0.00010857	507.765	4.21892e-05	9.53822e-06	513.923	0.000672382	0.000143663	522.012	4.68567e-06	1.5302e-06	512.98	0.00119973	0.000233377	528.244	0.00300003	0.000548717	493.024	0.000365604	7.76388e-05	520.959	0.00051039	0.000114182	505.61	0.000481327	9.66059e-05	504.589	1.11676e-05	2.63401e-06
500.584	0.000567342	0.000118855	506.734	0.000579168	0.000114166	508.052	4.50978e-05	1.01214e-05	514.234	0.000719734	0.000152494	522.315	5.19751e-06	1.68863e-06	513.283	0.00127428	0.000245636	528.542	0.00317124	0.000574525	493.317	0.000389595	8.20751e-05	521.268	0.000547957	0.000121616	505.898	0.000510638	0.000101634	504.862	1.19349e-05	2.80464e-06
500.884	0.000605036	0.000125703	507.023	0.000613894	0.000119979	508.339	4.81824e-05	1.07343e-05	514.544	0.000769964	0.00016176	522.618	5.76201e-06	1.86234e-06	513.587	0.0013527	0.000258369	528.84	0.00335038	0.000601159	493.609	0.000414941	8.67133e-05	521.577	0.000587942	0.000129448	506.186	0.000541457	0.000106861	505.136	1.27514e-05	2.98434e-06
501.183	0.000644876	0.000132863	507.313	0.000650366	0.000126013	508.627	5.1452e-05	1.13779e-05	514.855	0.000823211	0.000171474	522.921	6.38421e-06	2.05271e-06	513.89	0.00143512	0.000271584	529.138	0.0035377	0.000628621	493.901	0.000441703	9.15591e-05	521.886	0.000630475	0.000137693	506.475	0.000573841	0.000112291	505.409	1.36196e-05	3.17358e-06
501.483	0.000686959	0.000140342	507.602	0.000688649	0.000132271	508.914	5.49157e-05	1.20532e-05	515.165	0.000879616	0.000181649	523.224	7.06961e-06	2.2612e-06	514.194	0.0015217	0.000285286	529.436	0.00373345	0.000656912	494.193	0.000469944	9.66179e-05	522.195	0.000675687	0.000146368	506.763	0.000607851	0.000117928	505.683	1.45424e-05	3.37285e-06
501.783	0.000731382	0.000148149	507.892	0.00072881	0.000138758	509.202	5.85829e-05	1.27615e-05	515.476	0.000939329	0.000192298	523.527	7.82416e-06	2.48937e-06	514.497	0.0016126	0.000299482	529.734	0.00393789	0.00068603	494.486	0.000499727	0.000101895	522.504	0.000723716	0.000155487	507.052	0.000643547	0.000123774	505.956	1.55226e-05	3.58265e-06
502.083	0.000778248	0.000156291	508.181	0.000770915	0.000145476	509.489	6.24634e-05	1.35037e-05	515.786	0.0010025	0.000203433	523.83	8.65437e-06	2.73894e-06	514.801	0.00170795	0.000314175	530.032	0.00415124	0.000715971	494.778	0.000531119	0.000107396	522.813	0.000774704	0.000165064	507.34	0.000680991	0.000129833	506.23	1.65632e-05	3.8035e-06
502.383	0.000827657	0.000164777	508.471	0.000815032	0.000152427	509.776	6.65673e-05	1.4281e-05	516.097	0.00106928	0.000215068	524.134	9.56727e-06	3.01174e-06	515.104	0.00180791	0.000329371	530.33	0.00437376	0.00074673	495.07	0.000564185	0.000113127	523.121	0.000828796	0.000175115	507.628	0.000720244	0.000136108	506.504	1.76674e-05	4.03593e-06
502.683	0.000879717	0.000173613	508.76	0.000861229	0.000159614	510.064	7.09049e-05	1.50946e-05	516.407	0.00113984	0.000227213	524.437	1.05705e-05	3.30973e-06	515.408	0.00191264	0.000345071	530.628	0.00460568	0.0007783	495.363	0.000598995	0.000119091	523.43	0.000886144	0.000185655	507.917	0.00076137	0.000142601	506.777	1.88385e-05	4.2805e-06
502.983	0.000934532	0.000182806	509.049	0.000909576	0.00016704	510.351	7.54871e-05	1.59455e-05	516.718	0.00121433	0.000239882	524.74	1.16723e-05	3.63504e-06	515.711	0.00202228	0.000361277	530.926	0.00484726	0.00081067	495.655	0.000635618	0.000125294	523.739	0.000946903	0.000196699	508.205	0.000804432	0.000149314	507.051	2.008e-05	4.53777e-06
503.282	0.000992214	0.000192363	509.339	0.000960141	0.000174706	510.638	8.03248e-05	1.68347e-05	517.028	0.00129291	0.000253084	525.043	1.28817e-05	3.98995e-06	516.015	0.002137	0.000377991	531.224	0.00509871	0.000843827	495.947	0.000674125	0.00013174	524.048	0.00101123	0.000208261	508.494	0.000849494	0.000156251	507.324	2.13955e-05	4.80835e-06
503.582	0.00105287	0.00020229	509.628	0.00101299	0.000182612	510.926	8.54294e-05	1.77636e-05	517.339	0.00137577	0.00026683	525.346	1.42084e-05	4.37689e-06	516.318	0.00225695	0.000395213	531.522	0.00536028	0.000877758	496.239	0.000714588	0.000138435	524.357	0.0010793	0.000220355	508.782	0.000896622	0.000163411	507.598	2.27888e-05	5.09284e-06
503.882	0.00111662	0.000212594	509.918	0.00106821	0.000190761	511.213	9.08126e-05	1.8733e-05	517.649	0.00146307	0.000281129	525.649	1.56629e-05	4.79849e-06	516.622	0.00238228	0.000412939	531.82	0.00563218	0.000912445	496.532	0.000757082	0.000145381	524.666	0.00115127	0.000232996	509.07	0.000945879	0.000170797	507.872	2.4264e-05	5.39189e-06
504.182	0.00118357	0.000223279	510.207	0.00112585	0.000199151	511.5	9.64864e-05	1.97441e-05	517.96	0.00155498	0.000295992	525.952	1.72565e-05	5.25757e-06	516.925	0.00251313	0.000431169	532.118	0.00591463	0.000947869	496.824	0.000801681	0.000152582	524.975	0.00122732	0.000246196	509.359	0.000997332	0.00017841	508.145	2.58252e-05	5.70614e-06
504.482	0.00125384	0.00023435	510.497	0.00118599	0.000207784	511.788	0.000102463	2.07979e-05	518.271	0.00165168	0.000311426	526.255	1.90016e-05	5.75712e-06	517.229	0.00264968	0.000449897	532.416	0.00620786	0.000984006	497.116	0.000848461	0.000160043	525.284	0.00130762	0.000259969	509.647	0.00105105	0.000186248	508.419	2.74766e-05	6.03629e-06
504.782	0.00132755	0.00024581	510.786	0.00124869	0.000216658	512.075	0.000108755	2.18956e-05	518.581	0.00175336	0.000327438	526.559	2.09113e-05	6.30038e-06	517.532	0.00279205	0.000469119	532.714	0.00651206	0.00102083	497.409	0.000897498	0.000167765	525.593	0.00139236	0.000274329	509.936	0.00110709	0.000194314	508.692	2.9223e-05	6.38305e-06
505.082	0.00140482	0.000257665	511.075	0.00131404	0.000225771	512.363	0.000115375	2.3038e-05	518.892	0.00186019	0.000344035	526.862	2.3e-05	6.89077e-06	517.836	0.00294041	0.000488826	533.012	0.00682743	0.00105832	497.701	0.00094887	0.000175753	525.901	0.00148172	0.000289285	510.224	0.00116552	0.000202605	508.966	3.10689e-05	6.74716e-06
505.381	0.00148575	0.000269915	511.365	0.00138209	0.000235123	512.65	0.000122337	2.42263e-05	519.202	0.00197236	0.000361222	527.165	2.5283e-05	7.53198e-06	518.139	0.00309489	0.000509012	533.31	0.00715416	0.00109644	497.993	0.00100265	0.000184007	526.21	0.00157589	0.000304851	510.512	0.0012264	0.000211121	509.24	3.30194e-05	7.12938e-06
505.681	0.00157048	0.000282564	511.654	0.00145292	0.000244711	512.937	0.000129654	2.54613e-05	519.513	0.00209005	0.000379004	527.468	2.7777e-05	8.22793e-06	518.443	0.00325565	0.000529665	533.608	0.00749242	0.00113515	498.286	0.00105893	0.00019253	526.519	0.00167505	0.000321036	510.801	0.00128981	0.000219861	509.513	3.50797e-05	7.53051e-06
505.981	0.00165912	0.000295612	511.944	0.00152659	0.000254532	513.225	0.000137339	2.6744e-05	519.823	0.00221344	0.000397382	527.771	3.04998e-05	8.98281e-06	518.746	0.0034228	0.000550775	533.906	0.00784239	0.00117442	498.578	0.00111778	0.000201324	526.828	0.00177941	0.000337851	511.089	0.0013558	0.000228822	509.787	3.72551e-05	7.95138e-06
506.281	0.0017518	0.00030906	512.233	0.00160317	0.000264582	513.512	0.000145407	2.80753e-05	520.134	0.00234273	0.00041636	528.074	3.34706e-05	9.80106e-06	519.05	0.0035965	0.000572328	534.204	0.00820422	0.00121422	498.87	0.00117927	0.000210389	527.137	0.00188916	0.000355304	511.378	0.00142444	0.000238002	510.06	3.95513e-05	8.39287e-06
506.581	0.00184862	0.000322908	512.523	0.00168272	0.000274857	513.799	0.000153872	2.94561e-05	520.444	0.0024781	0.000435938	528.377	3.67101e-05	1.06874e-05	519.353	0.00377688	0.000594308	534.502	0.00857804	0.00125449	499.162	0.0012435	0.000219724	527.446	0.00200451	0.000373403	511.666	0.00149579	0.000247397	510.334	4.19742e-05	8.85587e-06
506.881	0.00194972	0.000337154	512.812	0.00176531	0.000285352	514.087	0.000162747	3.0887e-05	520.755	0.00261973	0.000456114	528.68	4.02405e-05	1.1647e-05	519.657	0.00396404	0.0006167	534.8	0.008964	0.00129519	499.455	0.00131053	0.000229331	527.755	0.00212564	0.000392154	511.954	0.00156991	0.000257004	510.607	4.45299e-05	9.34132e-06
507.181	0.00205521	0.000351794	513.102	0.001851	0.000296061	514.374	0.000172049	3.2369e-05	521.065	0.00276781	0.000476886	528.983	4.40855e-05	1.26851e-05	519.96	0.00415812	0.000639484	535.098	0.0093622	0.00133628	499.747	0.00138045	0.000239209	528.064	0.00225277	0.000411564	512.243	0.00164686	0.000266817	510.881	4.72248e-05	9.85021e-06
507.48	0.00216521	0.000366828	513.391	0.00193984	0.000306977	514.662	0.000181792	3.39027e-05	521.376	0.00292253	0.00049825	529.287	4.82707e-05	1.38074e-05	520.264	0.00435923	0.000662641	535.396	0.00977274	0.0013777	500.039	0.00145333	0.000249355	528.373	0.0023861	0.000431637	512.531	0.0017267	0.000276833	511.155	5.00657e-05	1.03836e-05
507.78	0.00227983	0.000382248	513.68	0.00203191	0.000318094	514.949	0.00019199	3.54888e-05	521.686	0.00308406	0.000520199	529.59	5.28234e-05	1.502e-05	520.567	0.00456748	0.000686148	535.693	0.0101957	0.0014194	500.332	0.00152926	0.000259767	528.682	0.00252584	0.000452375	512.82	0.00180948	0.000287045	511.428	5.30594e-05	1.09425e-05
508.08	0.00239919	0.000398051	513.97	0.00212725	0.000329404	515.236	0.000202659	3.71278e-05	521.997	0.00325259	0.000542727	529.893	5.7773e-05	1.63293e-05	520.87	0.00478295	0.00070998	535.991	0.0106312	0.00146131	500.624	0.00160831	0.000270444	528.99	0.00267218	0.00047378	513.108	0.00189526	0.000297446	511.702	5.62134e-05	1.1528e-05
508.38	0.0025234	0.000414228	514.259	0.00222592	0.000340898	515.524	0.000213815	3.88202e-05	522.307	0.00342829	0.000565824	530.196	6.31509e-05	1.77421e-05	521.174	0.00500576	0.000734113	536.289	0.0110792	0.00150339	500.916	0.00169056	0.00028138	529.299	0.00282535	0.000495853	513.396	0.0019841	0.00030803	511.975	5.95351e-05	1.21414e-05
508.68	0.00265257	0.000430773	514.549	0.00232796	0.000352567	515.811	0.000225472	4.05666e-05	522.618	0.00361134	0.000589478	530.499	6.89905e-05	1.92655e-05	521.477	0.00523596	0.000758518	536.587	0.0115397	0.00154556	501.209	0.00177607	0.000292573	529.608	0.00298554	0.000518592	513.685	0.00207604	0.000318788	512.249	6.30326e-05	1.27838e-05
508.98	0.00278681	0.000447675	514.838	0.00243343	0.000364399	516.098	0.000237647	4.23673e-05	522.928	0.0038019	0.000613676	530.802	7.53277e-05	2.0907e-05	521.781	0.00547365	0.000783165	536.885	0.0120129	0.00158776	501.501	0.00186494	0.000304017	529.917	0.00315296	0.000541993	513.973	0.00217112	0.000329712	512.523	6.67142e-05	1.34566e-05
509.28	0.00292622	0.000464924	515.128	0.00254237	0.000376385	516.386	0.000250355	4.42227e-05	523.239	0.00400014	0.000638403	531.105	8.22007e-05	2.26749e-05	522.084	0.00571888	0.000808022	537.183	0.0124986	0.00162992	501.793	0.00195722	0.000315706	530.226	0.00332781	0.000566052	514.262	0.00226941	0.000340793	512.796	7.05886e-05	1.41611e-05
509.579	0.0030709	0.000482509	515.417	0.00265481	0.000388513	516.673	0.000263612	4.61329e-05	523.549	0.00420621	0.000663642	531.408	8.96504e-05	2.45773e-05	522.388	0.00597171	0.000833056	537.481	0.0129968	0.00167196	502.085	0.00205298	0.000327633	530.535	0.00351029	0.000590762	514.55	0.00237093	0.00035202	513.07	7.46647e-05	1.48987e-05
509.879	0.00322096	0.000500416	515.706	0.00277081	0.000400769	516.96	0.000277434	4.80981e-05	523.86	0.00442028	0.000689372	531.711	9.77202e-05	2.66234e-05	522.691	0.00623218	0.000858231	537.779	0.0135075	0.00171383	502.378	0.0021523	0.000339791	530.844	0.00370061	0.000616113	514.838	0.00247573	0.000363384	513.343	7.89521e-05	1.56709e-05
510.179	0.00337647	0.000518631	515.996	0.00289038	0.00041314	517.248	0.000291836	5.01184e-05	524.17	0.00464248	0.000715572	532.015	0.000106457	2.88224e-05	522.995	0.00650033	0.000883509	538.077	0.0140306	0.00175542	502.67	0.00225524	0.000352172	531.153	0.00389895	0.000642095	515.127	0.00258384	0.000374871	513.617	8.34607e-05	1.64793e-05
510.479	0.00353754	0.000537137	516.285	0.00301357	0.000425612	517.535	0.000306835	5.21939e-05	524.481	0.00487295	0.000742218	532.318	0.000115909	3.11842e-05	523.298	0.00677616	0.000908852	538.375	0.014566	0.00179668	502.962	0.00236186	0.000364767	531.462	0.0041055	0.000668694	515.415	0.0026953	0.000386471	513.891	8.82008e-05	1.73255e-05
510.779	0.00370423	0.000555917	516.575	0.00314039	0.00043817	517.823	0.000322446	5.43243e-05	524.791	0.00511183	0.000769284	532.621	0.00012613	3.37192e-05	523.602	0.00705969	0.000934218	538.673	0.0151136	0.0018375	503.255	0.00247222	0.000377565	531.77	0.00432046	0.000695897	515.704	0.00281013	0.000398169	514.164	9.31832e-05	1.82113e-05
511.079	0.00387664	0.000574953	516.864	0.00327086	0.000450798	518.11	0.000338684	5.65095e-05	525.102	0.00535924	0.00079674	532.924	0.000137175	3.64382e-05	523.905	0.00735092	0.000959563	538.971	0.0156731	0.00187782	503.547	0.00258638	0.000390555	532.079	0.004544	0.000723685	515.992	0.00292836	0.000409953	514.438	9.84193e-05	1.91385e-05
511.379	0.00405482	0.000594223	517.154	0.00340501	0.000463479	518.397	0.000355567	5.87492e-05	525.413	0.00561528	0.000824557	533.227	0.000149103	3.93527e-05	524.209	0.00764982	0.000984843	539.269	0.0162445	0.00191755	503.839	0.00270438	0.000403726	532.388	0.0047763	0.000752038	516.28	0.00305001	0.000421807	514.711	0.000103921	2.01089e-05
511.678	0.00423885	0.000613707	517.443	0.00354283	0.000476197	518.685	0.000373109	6.10432e-05	525.723	0.00588006	0.000852699	533.53	0.000161977	4.24746e-05	524.512	0.00795635	0.00101001	539.567	0.0168276	0.00195659	504.131	0.00282629	0.000417064	532.697	0.00501753	0.000780935	516.569	0.00317509	0.000433717	514.985	0.0001097	2.11248e-05
511.978	0.00442877	0.00063338	517.732	0.00368435	0.000488932	518.972	0.000391325	6.33908e-05	526.034	0.00615367	0.000881132	533.833	0.000175865	4.58165e-05	524.816	0.00827048	0.00103502	539.865	0.017422	0.00199486	504.424	0.00295214	0.000430557	533.006	0.00526784	0.00081035	516.857	0.00330362	0.000445666	515.259	0.000115771	2.21881e-05
512.278	0.00462465	0.000653219	518.022	0.00382954	0.000501666	519.259	0.000410231	6.57916e-05	526.344	0.00643619	0.000909818	534.136	0.000190836	4.93915e-05	525.119	0.00859213	0.00105982	540.163	0.0180276	0.00203226	504.716	0.00308197	0.000444188	533.315	0.00552739	0.000840257	517.146	0.0034356	0.000457639	515.532	0.000122146	2.33011e-05
512.578	0.00482651	0.000673196	518.311	0.00397842	0.000514379	519.547	0.000429842	6.82449e-05	526.655	0.00672768	0.000938716	534.439	0.000206966	5.32131e-05	525.423	0.00892123	0.00108436	540.461	0.0186441	0.00206872	505.008	0.00321583	0.000457944	533.624	0.00579632	0.000870627	517.434	0.00357104	0.000469617	515.806	0.00012884	2.44663e-05
512.878	0.0050344	0.000693285	518.601	0.00413097	0.000527051	519.834	0.000450173	7.07501e-05	526.965	0.0070282	0.000967783	534.743	0.000224333	5.72957e-05	525.726	0.00925769	0.00110859	540.759	0.0192711	0.00210412	505.301	0.00335373	0.000471806	533.933	0.00607477	0.000901427	517.722	0.00370993	0.000481584	516.079	0.000135867	2.56861e-05
513.178	0.00524833	0.000713455	518.89	0.00428716	0.000539662	520.121	0.000471239	7.33062e-05	527.276	0.00733778	0.000996973	535.046	0.000243021	6.16542e-05	526.03	0.00960138	0.00113245	541.057	0.0199083	0.00213838	505.593	0.00349572	0.000485758	534.242	0.00636285	0.000932622	518.011	0.00385226	0.00049352	516.353	0.000143244	2.69632e-05
513.478	0.00546833	0.000733677	519.18	0.00444698	0.000552189	520.409	0.000493054	7.59125e-05	527.586	0.00765645	0.00102624	535.349	0.000263118	6.6304e-05	526.333	0.00995219	0.00115589	541.355	0.0205554	0.00217141	505.885	0.0036418	0.000499781	534.55	0.00666068	0.000964175	518.299	0.00399801	0.000505406	516.626	0.000150987	2.83005e-05
513.777	0.0056944	0.000753919	519.469	0.0046104	0.000564611	520.696	0.000515631	7.8568e-05	527.897	0.00798421	0.00105553	535.652	0.000284718	7.12612e-05	526.637	0.01031	0.00117886	541.653	0.0212119	0.00220311	506.178	0.003792	0.000513857	534.859	0.00696835	0.000996046	518.588	0.00414718	0.000517223	516.9	0.000159112	2.97009e-05
514.077	0.00592653	0.000774147	519.758	0.00477737	0.000576905	520.984	0.000538986	8.12715e-05	528.207	0.00832107	0.0010848	535.955	0.000307919	7.65426e-05	526.94	0.0106746	0.00120129	541.951	0.0218774	0.00223338	506.47	0.00394632	0.000527964	535.168	0.00728595	0.00102819	518.876	0.00429973	0.00052895	517.174	0.00016764	3.11676e-05
514.377	0.00616472	0.000794326	520.048	0.00494786	0.000589047	521.271	0.000563131	8.40221e-05	528.518	0.00866698	0.00111399	536.258	0.000332825	8.21655e-05	527.244	0.0110458	0.00122313	542.249	0.0225515	0.00226214	506.762	0.00410477	0.000542081	535.477	0.00761356	0.00106057	519.164	0.00445563	0.000540567	517.447	0.000176587	3.27038e-05
514.677	0.00640893	0.000814422	520.337	0.00512181	0.000601015	521.558	0.00058808	8.68185e-05	528.828	0.00902192	0.00114304	536.561	0.000359544	8.8148e-05	527.547	0.0114234	0.00124431	542.547	0.0232337	0.00228928	507.054	0.00426734	0.000556188	535.786	0.00795122	0.00109313	519.453	0.00461484	0.000552053	517.721	0.000185975	3.43132e-05
514.977	0.00665913	0.000834396	520.627	0.00529917	0.000612785	521.846	0.000613845	8.96596e-05	529.139	0.00938582	0.00117189	536.864	0.00038819	9.45085e-05	527.851	0.0118073	0.00126479	542.845	0.0239235	0.00231471	507.347	0.00443402	0.00057026	536.095	0.00829898	0.00112582	519.741	0.00477732	0.000563387	517.994	0.000195824	3.59995e-05
515.277	0.00691527	0.00085421	520.916	0.00547987	0.000624332	522.133	0.000640438	9.2544e-05	529.449	0.0097586	0.00120049	537.167	0.000418885	0.000101266	528.154	0.0121971	0.00128451	543.143	0.0246203	0.00233835	507.639	0.0046048	0.000584276	536.404	0.00865686	0.0011586	520.03	0.00494301	0.000574546	518.268	0.000206156	3.77665e-05
515.577	0.0071773	0.000873825	521.206	0.00566384	0.000635632	522.42	0.000667873	9.54704e-05	529.76	0.0101402	0.00122878	537.471	0.000451755	0.000108442	528.458	0.0125927	0.00130339	543.441	0.0253236	0.0023601	507.931	0.00477966	0.00059821	536.713	0.00902488	0.00119139	520.318	0.00511187	0.000585508	518.542	0.000216996	3.96186e-05
515.876	0.00744513	0.0008932	521.495	0.00585101	0.00064666	522.708	0.000696161	9.84375e-05	530.07	0.0105304	0.00125668	537.774	0.000486933	0.000116055	528.761	0.0129937	0.0013214	543.739	0.0260328	0.00237988	508.224	0.00495855	0.000612037	537.022	0.00940301	0.00122415	520.606	0.00528383	0.000596252	518.815	0.000228366	4.156e-05
516.176	0.00771869	0.000912295	521.784	0.00604128	0.000657392	522.995	0.000725312	0.000101444	530.381	0.0109291	0.00128414	538.077	0.000524557	0.000124127	529.065	0.0134	0.00133845	544.037	0.0267472	0.00239759	508.516	0.00514145	0.000625732	537.331	0.00979124	0.00125682	520.895	0.00545882	0.000606754	519.089	0.000240293	4.35956e-05
516.476	0.00799788	0.000931067	522.074	0.00623456	0.000667802	523.282	0.000755339	0.000104489	530.691	0.0113363	0.00131109	538.38	0.000564774	0.000132679	529.368	0.013811	0.00135451	544.335	0.0274663	0.00241316	508.808	0.00532831	0.00063927	537.639	0.0101895	0.00128934	521.183	0.00563676	0.000616992	519.362	0.000252805	4.57301e-05
516.776	0.00828259	0.000949472	522.363	0.00643075	0.000677867	523.57	0.00078625	0.00010757	531.002	0.0117516	0.00133745	538.683	0.000607735	0.000141734	529.672	0.0142267	0.0013695	544.633	0.0281894	0.00242649	509.1	0.00551907	0.000652622	537.948	0.0105978	0.00132163	521.472	0.00581757	0.000626944	519.636	0.000265929	4.7969e-05
517.076	0.00857269	0.000967468	522.653	0.00662975	0.000687561	523.857	0.000818058	0.000110686	531.312	0.0121749	0.00136317	538.986	0.000653601	0.000151316	529.975	0.0146465	0.00138337	544.931	0.0289158	0.00243752	509.393	0.00571366	0.000665762	538.257	0.0110159	0.00135364	521.76	0.00600116	0.000636587	519.91	0.000279695	5.03176e-05
517.376	0.00886805	0.000985009	522.942	0.00683145	0.000696859	524.145	0.000850771	0.000113837	531.623	0.0126059	0.00138817	539.289	0.000702537	0.000161446	530.279	0.0150702	0.00139607	545.229	0.0296447	0.00244617	509.685	0.00591203	0.000678663	538.566	0.0114438	0.00138529	522.048	0.00618743	0.000645899	520.183	0.000294136	5.27819e-05
517.676	0.00916853	0.00100205	523.232	0.00703571	0.000705739	524.432	0.000884398	0.000117021	531.933	0.0130445	0.00141238	539.592	0.000754718	0.00017215	530.582	0.0154974	0.00140753	545.527	0.0303755	0.00245237	509.977	0.0061141	0.000691296	538.875	0.0118813	0.00141651	522.337	0.00637629	0.000654857	520.457	0.000309284	5.5368e-05
517.975	0.00947395	0.00101855	523.521	0.00724241	0.000714175	524.719	0.00091895	0.000120236	532.244	0.0134903	0.00143573	539.895	0.000810324	0.000183451	530.886	0.0159277	0.00141771	545.825	0.0311074	0.00245604	510.27	0.00631976	0.000703632	539.184	0.0123284	0.00144724	522.625	0.00656763	0.000663439	520.73	0.000325174	5.80825e-05
518.275	0.00978414	0.00103446	523.81	0.00745142	0.000722144	525.007	0.000954434	0.000123482	532.554	0.0139431	0.00145814	540.199	0.000869545	0.000195376	531.189	0.0163606	0.00142656	546.123	0.0318396	0.00245713	510.562	0.00652894	0.000715645	539.493	0.0127847	0.0014774	522.914	0.00676132	0.000671624	521.004	0.000341845	6.09322e-05
518.575	0.0100989	0.00104974	524.1	0.0076626	0.000729624	525.294	0.00099086	0.000126758	532.865	0.0144025	0.00147955	540.502	0.000932577	0.000207948	531.493	0.0167959	0.00143401	546.421	0.0325713	0.00245557	510.854	0.00674153	0.000727303	539.802	0.0132502	0.00150691	523.202	0.00695726	0.000679391	521.277	0.000359334	6.39245e-05
518.875	0.0104181	0.00106433	524.389	0.00787579	0.000736593	525.581	0.00102824	0.000130063	533.176	0.0148683	0.00149989	540.805	0.000999623	0.000221194	531.796	0.0172329	0.00144003	546.719	0.0333018	0.00245132	511.147	0.00695741	0.00073858	540.111	0.0137246	0.0015357	523.49	0.0071553	0.000686718	521.551	0.000377683	6.7067e-05
519.175	0.0107414	0.0010782	524.679	0.00809085	0.000743028	525.869	0.00106657	0.000133397	533.486	0.01534	0.00151908	541.108	0.0010709	0.000235141	532.1	0.0176713	0.00144457	547.017	0.0340302	0.00244432	511.439	0.00717647	0.000749446	540.419	0.0142076	0.00156369	523.779	0.00735533	0.000693586	521.825	0.000396935	7.03678e-05
519.475	0.0110686	0.0010913	524.968	0.0083076	0.000748909	526.156	0.00110587	0.000136758	533.797	0.0158173	0.00153705	541.411	0.00114662	0.000249815	532.403	0.0181107	0.00144758	547.315	0.0347556	0.00243454	511.731	0.00739858	0.000759873	540.728	0.014699	0.00159081	524.067	0.0075572	0.000699975	522.098	0.000417135	7.38354e-05
519.775	0.0113995	0.00110359	525.258	0.0085259	0.000754217	526.443	0.00114614	0.000140148	534.107	0.0162997	0.00155374	541.714	0.00122702	0.000265242	532.707	0.0185504	0.00144901	547.613	0.0354773	0.00242192	512.023	0.0076236	0.000769832	541.037	0.0151985	0.00161697	524.356	0.00776078	0.000705868	522.372	0.000438333	7.74789e-05
520.074	0.0117339	0.00111501	525.547	0.00874556	0.000758932	526.731	0.0011874	0.000143565	534.418	0.016787	0.00156907	542.017	0.00131233	0.00028145	533.01	0.0189902	0.00144884	547.911	0.0361944	0.00240645	512.316	0.00785138	0.000779295	541.346	0.0157057	0.0016421	524.644	0.0079659	0.000711246	522.645	0.000460578	8.13077e-05
520.374	0.0120714	0.00112554	525.836	0.0089664	0.000763038	527.018	0.00122964	0.000147012	534.728	0.0172785	0.00158297	542.32	0.0014028	0.000298466	533.314	0.0194293	0.00144703	548.209	0.0369061	0.00238809	512.608	0.00808178	0.000788234	541.655	0.0162204	0.00166612	524.932	0.00817242	0.000716092	522.919	0.000483924	8.53317e-05
520.674	0.0124118	0.00113512	526.126	0.00918826	0.000766517	527.306	0.00127289	0.000150487	535.039	0.0177739	0.00159539	542.623	0.00149868	0.000316317	533.617	0.0198674	0.00144353	548.507	0.0376114	0.00236683	512.9	0.00831463	0.000796623	541.964	0.0167421	0.00168894	525.221	0.00838018	0.000720391	523.193	0.000508427	8.95615e-05
520.974	0.0127547	0.00114372	526.415	0.00941093	0.000769355	527.593	0.00131714	0.000153992	535.349	0.0182727	0.00160625	542.927	0.00160023	0.000335032	533.921	0.020304	0.00143833	548.805	0.0383095	0.00234265	513.193	0.00854976	0.000804434	542.273	0.0172704	0.00171051	525.509	0.00858901	0.000724129	523.466	0.000534147	9.4008e-05
521.274	0.0130999	0.0011513	526.705	0.00963424	0.000771539	527.88	0.00136241	0.000157529	535.66	0.0187743	0.00161549	543.23	0.00170772	0.000354638	534.224	0.0207384	0.0014314	549.103	0.0389995	0.00231555	513.485	0.008787	0.000811642	542.582	0.017805	0.00173072	525.798	0.00879876	0.000727292	523.74	0.000561145	9.86828e-05
521.574	0.0134471	0.00115781	526.994	0.00985798	0.000773055	528.168	0.0014087	0.0001611	535.97	0.0192783	0.00162306	543.533	0.00182144	0.000375161	534.528	0.0211702	0.00142271	549.401	0.0396805	0.00228553	513.777	0.00902616	0.000818222	542.891	0.0183455	0.00174952	526.086	0.00900925	0.000729868	524.013	0.000589489	0.000103598
521.874	0.0137959	0.00116322	527.284	0.010082	0.000773895	528.455	0.00145603	0.000164706	536.281	0.0197841	0.00162889	543.836	0.00194166	0.00039663	534.831	0.0215988	0.00141224	549.699	0.0403518	0.0022526	514.069	0.00926706	0.000824149	543.2	0.0188912	0.00176682	526.374	0.00922032	0.000731849	524.287	0.000619246	0.000108766
522.173	0.014146	0.0011675	527.573	0.010306	0.000774048	528.742	0.00150441	0.00016835	536.591	0.0202912	0.00163294	544.139	0.00206869	0.000419072	535.135	0.0220237	0.00139999	549.997	0.0410124	0.00221678	514.362	0.00950949	0.000829401	543.508	0.0194418	0.00178256	526.663	0.00943178	0.000733223	524.561	0.00065049	0.000114201
522.473	0.014497	0.00117061	527.862	0.0105299	0.000773509	529.03	0.00155385	0.000172037	536.902	0.020799	0.00163514	544.442	0.00220282	0.000442514	535.438	0.0224443	0.00138593	550.295	0.0416614	0.00217809	514.654	0.00975325	0.000833955	543.817	0.0199968	0.00179665	526.951	0.00964346	0.000733986	524.834	0.000683298	0.000119917
522.773	0.0148486	0.00117252	528.152	0.0107534	0.000772272	529.317	0.00160436	0.000175769	537.212	0.0213068	0.00163546	544.745	0.00234437	0.000466982	535.742	0.0228601	0.00137007	550.593	0.0422981	0.00213656	514.946	0.00999813	0.000837791	544.126	0.0205556	0.00180903	527.24	0.00985518	0.00073413	525.108	0.000717751	0.000125927
523.073	0.0152004	0.0011732	528.441	0.0109764	0.000770335	529.604	0.00165596	0.000179552	537.523	0.0218141	0.00163384	545.048	0.00249365	0.000492503	536.045	0.0232706	0.0013524	550.891	0.0429216	0.00209223	515.239	0.0102439	0.000840889	544.435	0.0211177	0.00181963	527.528	0.0100668	0.000733654	525.381	0.000753932	0.000132248
523.373	0.015552	0.00117263	528.731	0.0111986	0.000767696	529.892	0.00170866	0.00018339	537.833	0.0223204	0.00163024	545.351	0.002651	0.000519102	536.349	0.0236751	0.00133292	551.189	0.043531	0.00204515	515.531	0.0104904	0.000843232	544.744	0.0216825	0.00182839	527.816	0.010278	0.000732555	525.655	0.000791932	0.000138894
523.673	0.0159031	0.00117078	529.02	0.0114198	0.000764358	530.179	0.00176248	0.000187289	538.144	0.0228248	0.00162464	545.655	0.00281674	0.000546805	536.652	0.0240732	0.00131164	551.487	0.0441256	0.00199538	515.823	0.0107373	0.000844804	545.053	0.0222494	0.00183525	528.105	0.0104888	0.000730834	525.929	0.000831845	0.000145884
523.973	0.0162532	0.00116763	529.31	0.0116398	0.000760324	530.467	0.00181744	0.000191256	538.454	0.023327	0.00161699	545.958	0.00299122	0.000575636	536.956	0.0244643	0.00128858	551.785	0.0447046	0.00194297	516.116	0.0109845	0.000845589	545.362	0.0228178	0.00184014	528.393	0.0106989	0.000728494	526.202	0.000873768	0.000153234
524.272	0.016602	0.00116316	529.599	0.0118585	0.000755601	530.754	0.00187356	0.000195299	538.765	0.023826	0.00160726	546.261	0.00317479	0.000605618	537.259	0.0248478	0.00126375	552.083	0.0452672	0.00188801	516.408	0.0112316	0.000845575	545.671	0.0233871	0.00184302	528.682	0.0109081	0.000725539	526.476	0.000917806	0.000160962
524.572	0.016949	0.00115735	529.888	0.0120757	0.000750196	531.041	0.00193087	0.000199425	539.075	0.0243215	0.00159544	546.564	0.00336781	0.000636775	537.563	0.0252233	0.00123717	552.381	0.0458127	0.00183056	516.7	0.0114786	0.000844752	545.98	0.0239566	0.00184382	528.97	0.0111164	0.000721977	526.749	0.000964066	0.000169087
524.872	0.0172939	0.0011502	530.178	0.012291	0.000744121	531.329	0.00198939	0.000203644	539.386	0.0248126	0.00158151	546.867	0.00357063	0.000669128	537.866	0.0255902	0.00120887	552.679	0.0463404	0.00177071	516.992	0.011725	0.000843111	546.288	0.0245258	0.00184251	529.258	0.0113234	0.000717818	527.023	0.00101266	0.000177629
525.172	0.0176363	0.0011417	530.467	0.0125045	0.000737391	531.616	0.00204915	0.000207966	539.696	0.0252987	0.00156544	547.17	0.00378363	0.000702698	538.17	0.025948	0.00117888	552.977	0.0468495	0.00170857	517.285	0.0119707	0.000840644	546.597	0.0250938	0.00183904	529.547	0.011529	0.000713073	527.296	0.00106372	0.000186607
525.472	0.0179757	0.00113183	530.757	0.0127158	0.000730021	531.903	0.00211019	0.000212401	540.007	0.0257791	0.00154724	547.473	0.00400717	0.000737506	538.473	0.0262962	0.00114724	553.275	0.0473395	0.00164423	517.577	0.0122155	0.000837349	546.906	0.0256601	0.00183337	529.835	0.0117331	0.000707757	527.57	0.00111735	0.000196043
525.772	0.0183117	0.00112059	531.046	0.0129247	0.000722031	532.191	0.00217253	0.000216963	540.318	0.0262532	0.0015269	547.776	0.00424165	0.000773569	538.777	0.0266342	0.00111399	553.573	0.0478097	0.00157781	517.869	0.012459	0.000833222	547.215	0.026224	0.00182547	530.123	0.0119356	0.000701887	527.844	0.0011737	0.00020596
526.072	0.0186439	0.001108	531.336	0.0131312	0.000713443	532.478	0.00223623	0.000221663	540.628	0.0267204	0.00150442	548.079	0.00448745	0.000810906	539.08	0.0269618	0.00107917	553.871	0.0482594	0.00150942	518.162	0.0127011	0.000828264	547.524	0.0267848	0.00181532	530.412	0.0121361	0.000695483	528.117	0.0012329	0.000216378
526.371	0.018972	0.00109404	531.625	0.0133351	0.000704282	532.766	0.00230132	0.000226517	540.939	0.0271799	0.00147981	548.383	0.00474495	0.000849531	539.384	0.0272783	0.00104284	554.169	0.0486883	0.0014392	518.454	0.0129415	0.000822479	547.833	0.0273417	0.00180288	530.7	0.0123347	0.000688568	528.391	0.00129509	0.000227322
526.671	0.0192955	0.00107874	531.915	0.0135361	0.000694576	533.053	0.00236786	0.000231539	541.249	0.0276311	0.00145309	548.686	0.00501455	0.00088946	539.687	0.0275833	0.00100505	554.467	0.0490957	0.00136726	518.746	0.01318	0.000815872	548.142	0.027894	0.00178814	530.989	0.0125312	0.000681166	528.664	0.00136043	0.000238816
526.971	0.0196139	0.0010621	532.204	0.0137342	0.000684355	533.34	0.00243589	0.000236746	541.56	0.0280734	0.00142427	548.989	0.00529666	0.000930704	539.991	0.0278764	0.000965874	554.765	0.0494813	0.00129376	519.039	0.0134163	0.000808451	548.451	0.0284411	0.00177109	531.277	0.0127253	0.000673307	528.938	0.00142907	0.000250885
527.271	0.019927	0.00104413	532.493	0.0139291	0.000673654	533.628	0.00250548	0.000242156	541.87	0.0285061	0.00139338	549.292	0.00559167	0.000973277	540.294	0.0281573	0.000925368	555.063	0.0498445	0.00121885	519.331	0.0136502	0.000800228	548.76	0.0289822	0.00175172	531.565	0.0129171	0.00066502	529.212	0.00150118	0.000263554
527.571	0.0202343	0.00102487	532.783	0.0141209	0.000662509	533.915	0.00257669	0.000247788	542.181	0.0289285	0.00136046	549.595	0.0059	0.00101719	540.598	0.0284255	0.000883606	555.361	0.050185	0.00114267	519.623	0.0138815	0.000791216	549.069	0.0295166	0.00173004	531.854	0.0131064	0.00065634	529.485	0.00157692	0.00027685
527.871	0.0205355	0.00100434	533.072	0.0143093	0.00065096	534.202	0.00264958	0.000253662	542.491	0.0293401	0.00132553	549.898	0.00622203	0.00106244	540.901	0.0286806	0.000840666	555.659	0.0505025	0.00106538	519.915	0.0141099	0.000781432	549.377	0.0300436	0.00170605	532.142	0.0132931	0.000647303	529.759	0.00165648	0.0002908
528.171	0.0208301	0.000982557	533.362	0.0144943	0.000639051	534.49	0.00272424	0.000259801	542.802	0.0297403	0.00128866	550.201	0.0065582	0.00110904	541.205	0.0289224	0.000796628	555.957	0.0507966	0.000987164	520.208	0.0143352	0.000770897	549.686	0.0305624	0.00167976	532.431	0.0134771	0.00063795	530.032	0.00174004	0.000305432
528.47	0.0211179	0.000959564	533.651	0.0146757	0.000626828	534.777	0.00280074	0.000266227	543.112	0.0301284	0.00124987	550.504	0.0069089	0.001157	541.508	0.0291505	0.000751579	556.255	0.0510673	0.000908184	520.5	0.0145572	0.000759634	549.995	0.0310725	0.0016512	532.719	0.0136583	0.000628323	530.306	0.0018278	0.000320775
528.77	0.0213983	0.000935396	533.941	0.0148535	0.000614338	535.064	0.00287918	0.000272965	543.423	0.0305039	0.00120925	550.807	0.00727455	0.00120632	541.812	0.0293646	0.000705607	556.553	0.0513142	0.00082862	520.792	0.0147758	0.000747668	550.304	0.031573	0.0016204	533.007	0.0138367	0.000618468	530.58	0.00191996	0.000336858
529.07	0.0216712	0.000910095	534.23	0.0150276	0.000601636	535.352	0.00295966	0.00028004	543.733	0.0308662	0.00116684	551.111	0.00765556	0.00125699	542.115	0.0295646	0.000658809	556.851	0.0515373	0.000748658	521.085	0.0149906	0.00073503	550.613	0.0320633	0.00158738	533.296	0.0140121	0.000608433	530.853	0.00201674	0.000353711
529.37	0.0219362	0.000883709	534.519	0.015198	0.000588775	535.639	0.00304227	0.000287482	544.044	0.0312148	0.00112271	551.414	0.00805234	0.00130902	542.419	0.0297501	0.000611283	557.149	0.0517365	0.000668486	521.377	0.0152016	0.000721751	550.922	0.0325428	0.00155219	533.584	0.0141847	0.00059827	531.127	0.00211834	0.000371364
529.67	0.022193	0.000856286	534.809	0.0153647	0.000575815	535.927	0.00312713	0.000295318	544.354	0.0315493	0.00107695	551.717	0.0084653	0.0013624	542.722	0.029921	0.000563132	557.447	0.0519118	0.000588299	521.669	0.0154085	0.000707867	551.231	0.0330107	0.00151487	533.873	0.0143543	0.000588033	531.4	0.002225	0.000389849
529.97	0.0224412	0.000827881	535.098	0.0155276	0.000562817	536.214	0.00321437	0.000303579	544.665	0.031869	0.00102962	552.02	0.00889485	0.00141712	543.026	0.0300771	0.000514462	557.745	0.0520633	0.000508296	521.961	0.0156112	0.000693418	551.54	0.0334665	0.00147549	534.161	0.0145209	0.000577781	531.674	0.00233695	0.000409198
530.27	0.0226807	0.000798555	535.388	0.0156867	0.000549845	536.501	0.00330411	0.000312297	544.975	0.0321736	0.000980833	552.323	0.00934138	0.00147317	543.329	0.0302184	0.000465385	558.043	0.052191	0.000428678	522.254	0.0158095	0.000678445	551.849	0.0339095	0.0014341	534.449	0.0146846	0.000567574	531.947	0.00245444	0.000429444
530.57	0.0229111	0.00076837	535.677	0.0158422	0.000536966	536.789	0.0033965	0.000321506	545.286	0.0324625	0.000930663	552.626	0.00980531	0.00153056	543.633	0.0303446	0.000416014	558.341	0.0522952	0.000349653	522.546	0.0160033	0.000662995	552.157	0.0343391	0.00139078	534.738	0.0148454	0.000557474	532.221	0.00257773	0.000450618
530.869	0.0231322	0.000737393	535.967	0.0159939	0.00052425	537.076	0.00349169	0.000331242	545.596	0.0327356	0.000879216	552.929	0.010287	0.00158925	543.936	0.0304559	0.000366466	558.639	0.0523761	0.000271428	522.838	0.0161924	0.000647116	552.466	0.0347548	0.00134559	535.026	0.0150033	0.000547549	532.495	0.00270707	0.000472755
531.169	0.0233438	0.000705698	536.256	0.016142	0.000511771	537.363	0.00358984	0.000341541	545.907	0.0329922	0.000826594	553.232	0.0107869	0.00164924	544.24	0.030552	0.000316864	558.937	0.052434	0.000194218	523.131	0.0163768	0.000630861	552.775	0.0351559	0.00129863	535.315	0.0151584	0.000537868	532.768	0.00284274	0.000495887
531.469	0.0235457	0.000673358	536.545	0.0162866	0.000499604	537.651	0.00369112	0.000352441	546.217	0.0332322	0.000772907	553.535	0.0113054	0.0017105	544.543	0.0306332	0.00026733	559.235	0.0524692	0.000118237	523.423	0.0165564	0.000614284	553.084	0.035542	0.00124999	535.603	0.0153108	0.000528501	533.042	0.00298502	0.00052005
531.769	0.0237378	0.000640455	536.835	0.0164278	0.000487828	537.938	0.00379571	0.000363984	546.528	0.0334553	0.000718272	553.839	0.0118428	0.00177303	544.847	0.0306993	0.00021799	559.533	0.0524822	4.37009e-05	523.715	0.016731	0.000597446	553.393	0.0359126	0.00119976	535.891	0.0154606	0.000519524	533.315	0.0031342	0.000545277
532.069	0.0239198	0.000607072	537.124	0.0165657	0.000476523	538.225	0.00390382	0.00037621	546.838	0.0336611	0.000662807	554.142	0.0123996	0.0018368	545.15	0.0307506	0.000168975	559.831	0.0524735	-2.91706e-05	524.008	0.0169007	0.000580407	553.702	0.0362672	0.00114805	536.18	0.015608	0.000511013	533.589	0.00329058	0.000571602
532.369	0.0240917	0.000573296	537.414	0.0167005	0.000465773	538.513	0.00401565	0.000389162	547.149	0.0338495	0.000606638	554.445	0.012976	0.00190178	545.454	0.0307871	0.000120415	560.129	0.0524437	-0.000100158	524.3	0.0170653	0.000563233	554.011	0.0366055	0.00109497	536.468	0.0157531	0.000503049	533.863	0.00345448	0.000599061
532.669	0.0242534	0.00053922	537.703	0.0168324	0.000455664	538.8	0.00413143	0.000402886	547.46	0.0340202	0.000549894	554.748	0.0135726	0.00196795	545.757	0.0308091	7.24438e-05	560.427	0.0523933	-0.000169041	524.592	0.0172249	0.000545992	554.32	0.0369269	0.00104064	536.757	0.015896	0.000495712	534.136	0.00362621	0.000627688
532.968	0.0244048	0.000504938	537.993	0.0169616	0.000446284	539.088	0.00425138	0.000417427	547.77	0.0341732	0.000492709	555.051	0.0141895	0.00203528	546.061	0.0308168	2.51973e-05	560.725	0.0523231	-0.000235597	524.884	0.0173794	0.000528756	554.629	0.0372312	0.000985178	537.045	0.0160371	0.000489087	534.41	0.0038061	0.000657518
533.268	0.0245459	0.000470549	538.282	0.0170883	0.000437723	539.375	0.00437576	0.000432834	548.081	0.0343084	0.000435222	555.354	0.0148271	0.00210374	546.364	0.0308104	-2.11874e-05	561.023	0.0522338	-0.000299607	525.177	0.017529	0.000511599	554.938	0.0375181	0.000928724	537.333	0.0161765	0.00048326	534.683	0.00399449	0.000688584
533.568	0.0246767	0.000436155	538.571	0.0172127	0.000430074	539.662	0.00450483	0.000449155	548.391	0.0344256	0.000377574	555.657	0.0154859	0.00217331	546.668	0.0307901	-6.65716e-05	561.321	0.0521263	-0.000360848	525.469	0.0176735	0.000494598	555.246	0.0377873	0.000871411	537.622	0.0163144	0.000478321	534.957	0.00419173	0.000720922
533.868	0.0247972	0.00040186	538.861	0.0173353	0.000423431	539.95	0.00463887	0.000466441	548.702	0.0345249	0.000319912	555.96	0.0161661	0.00224394	546.971	0.0307565	-0.000110815	561.619	0.0520014	-0.000419102	525.761	0.0178132	0.000477834	555.555	0.0380385	0.000813382	537.91	0.0164512	0.000474359	535.231	0.00439817	0.000754565
534.168	0.0249075	0.000367775	539.15	0.0174563	0.00041789	540.237	0.00477817	0.000484744	549.012	0.0346064	0.000262384	556.263	0.016868	0.00231561	547.275	0.0307098	-0.000153777	561.917	0.0518601	-0.00047415	526.054	0.0179481	0.000461389	555.864	0.0382717	0.000754788	538.199	0.0165872	0.000471466	535.504	0.00461418	0.000789546
534.468	0.0250076	0.000334009	539.44	0.0175759	0.000413548	540.524	0.00492304	0.000504118	549.323	0.0346701	0.000205143	556.567	0.0175919	0.00238827	547.578	0.0306506	-0.000195316	562.215	0.0517034	-0.000525775	526.346	0.0180782	0.00044535	556.173	0.0384866	0.00069578	538.487	0.0167227	0.000469736	535.778	0.00484014	0.000825899
534.768	0.0250978	0.000300677	539.729	0.0176948	0.000410506	540.812	0.00507379	0.000524616	549.633	0.0347162	0.000148344	556.87	0.0183381	0.0024619	547.882	0.0305792	-0.000235289	562.513	0.0515324	-0.000573761	526.638	0.0182039	0.000429805	556.482	0.0386832	0.000636519	538.775	0.016858	0.000469266	536.051	0.00507642	0.000863655
535.067	0.0251781	0.000267896	540.019	0.0178131	0.000408862	541.099	0.00523078	0.000546294	549.944	0.0347448	9.21459e-05	557.173	0.0191069	0.00253645	548.185	0.0304961	-0.000273554	562.811	0.0513483	-0.000617898	526.93	0.0183251	0.000414845	556.791	0.0388615	0.000577169	539.064	0.0169936	0.00047015	536.325	0.00532343	0.000902846
535.367	0.0252488	0.000235785	540.308	0.0179314	0.000408719	541.386	0.00539435	0.000569209	550.254	0.0347562	3.67077e-05	557.476	0.0198986	0.00261189	548.489	0.0304021	-0.000309967	563.109	0.0511522	-0.000657974	527.223	0.0184422	0.000400562	557.1	0.0390215	0.000517899	539.352	0.0171299	0.000472488	536.599	0.00558157	0.000943503
535.667	0.0253101	0.000204465	540.597	0.0180501	0.000410178	541.674	0.00556488	0.000593418	550.565	0.0347507	-1.78079e-05	557.779	0.0207134	0.00268817	548.792	0.0302975	-0.000344386	563.407	0.0509455	-0.000693785	527.515	0.0185553	0.000387053	557.409	0.0391632	0.000458881	539.641	0.0172672	0.000476378	536.872	0.00585123	0.000985655
535.967	0.0253623	0.00017406	540.887	0.0181697	0.000413344	541.961	0.00574275	0.000618979	550.875	0.0347285	-7.12369e-05	558.082	0.0215516	0.00276525	549.096	0.0301832	-0.000376668	563.705	0.0507294	-0.000725127	527.807	0.0186648	0.000374414	557.718	0.0392869	0.000400292	539.929	0.0174062	0.000481919	537.146	0.00613285	0.00102933
536.267	0.0254057	0.000144695	541.176	0.0182908	0.000418318	542.249	0.00592838	0.000645952	551.186	0.0346902	-0.000123414	558.385	0.0224134	0.0028431	549.399	0.0300598	-0.000406671	564.003	0.0505054	-0.000751804	528.1	0.0187708	0.000362745	558.026	0.0393926	0.000342312	540.217	0.0175473	0.000489213	537.419	0.00642683	0.00107456
536.567	0.0254407	0.000116497	541.466	0.0184139	0.000425206	542.536	0.00612217	0.000674396	551.496	0.0346361	-0.000174172	558.688	0.023299	0.00292167	549.703	0.029928	-0.000434254	564.301	0.0502749	-0.000773619	528.392	0.0188737	0.000352148	558.335	0.0394807	0.000285126	540.506	0.017691	0.000498358	537.693	0.00673363	0.00112136
536.867	0.0254675	8.95954e-05	541.755	0.0185395	0.000434111	542.823	0.00632459	0.000704371	551.807	0.0345668	-0.000223344	558.992	0.0242086	0.00300093	550.006	0.0297886	-0.000459276	564.599	0.0500393	-0.000790386	528.684	0.0189739	0.000342724	558.644	0.0395514	0.000228919	540.794	0.017838	0.000509457	537.966	0.00705366	0.00116976
537.166	0.0254868	6.41195e-05	542.045	0.0186684	0.000445137	543.111	0.00653607	0.000735938	552.117	0.0344827	-0.000270762	559.295	0.0251425	0.00308082	550.31	0.0296425	-0.000481598	564.897	0.0498004	-0.00080192	528.977	0.0190717	0.000334579	558.953	0.0396051	0.00017388	541.083	0.0179887	0.000522609	538.24	0.00738738	0.00121978
537.466	0.0254988	4.02e-05	542.334	0.018801	0.000458388	543.398	0.0067571	0.000769157	552.428	0.0343845	-0.000316258	559.598	0.0261007	0.00316131	550.613	0.0294904	-0.000501082	565.195	0.0495596	-0.000808044	529.269	0.0191675	0.000327818	559.262	0.0396422	0.000120201	541.371	0.0181438	0.000537915	538.514	0.00773523	0.00127144
537.766	0.0255042	1.79689e-05	542.623	0.0189382	0.000473965	543.685	0.00698816	0.000804089	552.738	0.0342728	-0.000359662	559.901	0.0270835	0.00324237	550.917	0.0293333	-0.000517591	565.493	0.0493186	-0.000808584	529.561	0.0192618	0.000322548	559.571	0.0396633	6.80734e-05	541.659	0.018304	0.000555475	538.787	0.00809768	0.00132477
538.066	0.0255035	-2.44176e-06	542.913	0.0190806	0.000491972	543.973	0.00722978	0.000840793	553.049	0.0341484	-0.000400808	560.204	0.028091	0.00332395	551.22	0.0291721	-0.00053099	565.791	0.0490792	-0.000803377	529.853	0.019355	0.000318875	559.88	0.0396687	1.76924e-05	541.948	0.01847	0.000575388	539.061	0.00847517	0.00137977
538.366	0.0254972	-2.08991e-05	543.202	0.0192289	0.000512509	544.26	0.00748247	0.000879331	553.359	0.0340119	-0.000439526	560.507	0.0291234	0.00340601	551.524	0.0290079	-0.000541147	566.089	0.0488431	-0.000792262	530.146	0.0194476	0.000316909	560.189	0.0396592	-3.07475e-05	542.236	0.0186423	0.000597751	539.334	0.00886817	0.00143646
538.666	0.025486	-3.72704e-05	543.492	0.019384	0.000535674	544.547	0.00774677	0.000919762	553.67	0.0338642	-0.000475651	560.81	0.0301808	0.00348851	551.827	0.0288416	-0.00054793	566.387	0.0486122	-0.000775089	530.438	0.0195402	0.000316758	560.498	0.0396354	-7.70506e-05	542.525	0.0188219	0.000622662	539.608	0.00927715	0.00149485
538.966	0.0254706	-5.14228e-05	543.781	0.0195465	0.000561567	544.835	0.00802326	0.000962144	553.98	0.0337061	-0.000509017	561.113	0.0312634	0.00357143	552.131	0.0286743	-0.00055121	566.685	0.0483882	-0.000751712	530.73	0.0196333	0.000318531	560.807	0.039598	-0.000121021	542.813	0.0190094	0.000650215	539.882	0.00970257	0.00155495
539.265	0.0254516	-6.3224e-05	544.071	0.0197174	0.000590282	545.122	0.0083125	0.00100654	554.291	0.0335386	-0.000539459	561.416	0.0323712	0.00365473	552.434	0.0285071	-0.000550862	566.983	0.048173	-0.000721995	531.023	0.0197276	0.000322337	561.115	0.0395479	-0.000162464	543.101	0.0192057	0.000680503	540.155	0.0101449	0.00161676
539.565	0.0254299	-7.25419e-05	544.36	0.0198974	0.000621914	545.41	0.0086151	0.00105299	554.602	0.0333626	-0.000566814	561.72	0.0335043	0.00373837	552.738	0.0283412	-0.000546761	567.281	0.0479687	-0.000685809	531.315	0.0198235	0.000328284	561.424	0.0394857	-0.000201185	543.39	0.0194115	0.000713618	540.429	0.0106046	0.00168029
539.865	0.0254061	-7.92456e-05	544.649	0.0200874	0.000656554	545.697	0.00893165	0.00110157	554.912	0.0331791	-0.000590922	562.023	0.0346629	0.00382233	553.041	0.0281777	-0.000538787	567.579	0.047777	-0.000643035	531.607	0.0199219	0.000336482	561.733	0.0394125	-0.00023699	543.678	0.0196277	0.000749648	540.702	0.0110822	0.00174554
540.165	0.0253812	-8.3205e-05	544.939	0.0202883	0.000694289	545.984	0.00926279	0.00115233	555.223	0.0329892	-0.000611624	562.326	0.035847	0.00390658	553.345	0.0280178	-0.000526821	567.877	0.0476002	-0.00059356	531.899	0.0200233	0.000347038	562.042	0.0393292	-0.000269687	543.967	0.0198552	0.000788679	540.976	0.0115781	0.00181249
540.465	0.0253559	-8.42912e-05	545.228	0.0205011	0.000735206	546.272	0.00960915	0.00120531	555.533	0.0327939	-0.000628762	562.629	0.0370568	0.00399109	553.648	0.0278628	-0.000510749	568.175	0.0474401	-0.000537283	532.192	0.0201285	0.000360059	562.351	0.0392368	-0.000299087	544.255	0.0200947	0.000830793	541.25	0.0120927	0.00188115
540.765	0.0253312	-8.23772e-05	545.518	0.0207267	0.000779385	546.559	0.0099714	0.00126057	555.844	0.0325945	-0.000642183	562.932	0.0382922	0.00407585	553.952	0.0277139	-0.000490458	568.473	0.0472988	-0.000474111	532.484	0.0202383	0.00037565	562.66	0.0391364	-0.000325	544.543	0.0203474	0.000876071	541.523	0.0126266	0.0019515
541.065	0.025308	-7.73374e-05	545.807	0.020966	0.000826906	546.846	0.0103502	0.00131815	556.154	0.0323921	-0.000651735	563.235	0.0395534	0.00416082	554.255	0.0275725	-0.000465841	568.771	0.0471784	-0.00040396	532.776	0.0203535	0.000393917	562.969	0.0390292	-0.000347244	544.832	0.0206141	0.000924588	541.797	0.0131802	0.00202353
541.364	0.0252873	-6.90484e-05	546.097	0.0212201	0.000877842	547.134	0.0107462	0.00137811	556.465	0.0321881	-0.000657271	563.538	0.0408404	0.00424601	554.559	0.02744	-0.000436793	569.069	0.047081	-0.000326757	533.069	0.0204748	0.000414961	563.278	0.0389162	-0.000365635	545.12	0.0208957	0.000976415	542.07	0.013754	0.00209721
541.664	0.0252701	-5.73892e-05	546.386	0.0214899	0.000932264	547.421	0.0111601	0.00144047	556.775	0.0319835	-0.000658645	563.841	0.0421533	0.00433138	554.862	0.0273176	-0.000403213	569.367	0.0470088	-0.00024244	533.361	0.0206031	0.000438882	563.587	0.0387988	-0.000379997	545.409	0.0211932	0.00103162	542.344	0.0143484	0.00217252
541.964	0.0252574	-4.22413e-05	546.675	0.0217766	0.000990235	547.708	0.0115927	0.00150528	557.086	0.0317799	-0.000655715	564.144	0.0434922	0.00441693	555.166	0.0272068	-0.000365004	569.665	0.0469638	-0.000150955	533.653	0.0207392	0.00046578	563.895	0.0386783	-0.000390155	545.697	0.0215076	0.00109027	542.618	0.0149638	0.00224943
542.264	0.0252504	-2.34889e-05	546.965	0.022081	0.00105182	547.996	0.0120446	0.00157258	557.396	0.0315786	-0.000648344	564.448	0.044857	0.00450265	555.469	0.0271091	-0.000322073	569.963	0.0469482	-5.22611e-05	533.946	0.0208841	0.000495751	564.204	0.038556	-0.000395939	545.985	0.02184	0.00115242	542.891	0.0156007	0.00232792
542.564	0.0252501	-1.01938e-06	547.254	0.0224043	0.00111707	548.283	0.0125166	0.0016424	557.707	0.031381	-0.000636397	564.751	0.0462478	0.00458854	555.773	0.0270258	-0.000274333	570.261	0.0469642	5.36712e-05	534.238	0.0210387	0.000528886	564.513	0.0384333	-0.000397184	546.274	0.0221913	0.00121811	543.165	0.0162595	0.00240794
542.864	0.0252577	2.52764e-05	547.544	0.0227476	0.00118603	548.571	0.0130094	0.00171476	558.017	0.0311885	-0.000619745	565.054	0.0476647	0.0046746	556.076	0.0269585	-0.000221699	570.558	0.0470139	0.000166861	534.53	0.0212039	0.000565277	564.822	0.0383117	-0.000393732	546.562	0.0225625	0.00128741	543.438	0.0169406	0.00248946
543.164	0.0252743	5.55041e-05	547.833	0.0231119	0.00125875	548.858	0.0135236	0.0017897	558.328	0.0310028	-0.000598261	565.357	0.0491078	0.00476082	556.38	0.0269087	-0.000164093	570.856	0.0470996	0.000287315	534.822	0.0213808	0.00060501	565.131	0.0381927	-0.000385428	546.851	0.0229549	0.00136035	543.712	0.0176444	0.00257241
543.463	0.0253012	8.97654e-05	548.123	0.0234984	0.00133527	549.145	0.0140602	0.00186721	558.638	0.0308252	-0.000571824	565.66	0.050577	0.00484722	556.683	0.0268779	-0.00010144	571.154	0.0472232	0.000415028	535.115	0.0215702	0.000648167	565.44	0.0380777	-0.000372125	547.139	0.0233693	0.00143697	543.985	0.0183712	0.00265676
543.763	0.0253397	0.000128158	548.412	0.0239081	0.00141562	549.433	0.0146198	0.00194733	558.949	0.0306574	-0.000540319	565.963	0.0520725	0.00493379	556.987	0.0268677	-3.36726e-05	571.452	0.0473871	0.000549982	535.407	0.0217733	0.000694827	565.749	0.0379685	-0.000353681	547.427	0.0238069	0.00151729	544.259	0.0191216	0.00274245
544.063	0.0253909	0.000170774	548.701	0.0243422	0.00149981	549.72	0.0152032	0.00203006	559.259	0.030501	-0.000503632	566.266	0.0535943	0.00502056	557.29	0.0268796	3.9274e-05	571.75	0.0475934	0.000692148	535.699	0.0219911	0.000745064	566.058	0.0378665	-0.000329962	547.716	0.0242687	0.00160134	544.533	0.0198957	0.00282941
544.363	0.0254561	0.000217703	548.991	0.0248018	0.00158788	550.007	0.0158111	0.00211541	559.57	0.0303577	-0.000461658	566.569	0.0551425	0.00510753	557.594	0.0269153	0.000117457	572.048	0.0478441	0.000841482	535.992	0.0222246	0.00079895	566.367	0.0377736	-0.00030084	548.004	0.0247558	0.00168913	544.806	0.0206939	0.00291758
544.663	0.0255368	0.000269028	549.28	0.0252879	0.00167982	550.295	0.0164442	0.00220336	559.88	0.030229	-0.000414295	566.872	0.0567171	0.00519473	557.897	0.0269763	0.000200928	572.346	0.0481415	0.000997927	536.284	0.022475	0.000856547	566.675	0.0376914	-0.000266195	548.293	0.0252694	0.00178067	545.08	0.0215165	0.00300688
544.963	0.0256342	0.000324826	549.57	0.0258019	0.00177564	550.582	0.0171034	0.00229392	560.191	0.0301168	-0.000361447	567.176	0.0583182	0.00528216	558.201	0.0270642	0.000289734	572.644	0.0484876	0.00116141	536.576	0.0227433	0.000917917	566.984	0.0376216	-0.000225917	548.581	0.0258104	0.00187596	545.353	0.0223639	0.00309724
545.263	0.0257497	0.000385171	549.859	0.0263446	0.00187533	550.87	0.0177894	0.00238707	560.501	0.0300227	-0.000303026	567.479	0.0599458	0.00536985	558.504	0.0271807	0.000383913	572.942	0.0488845	0.00133186	536.869	0.0230307	0.000983112	567.293	0.037566	-0.0001799	548.869	0.02638	0.00197498	545.627	0.0232363	0.00318857
545.562	0.0258847	0.000450127	550.149	0.0269174	0.00197888	551.157	0.0185029	0.00248278	560.812	0.0299485	-0.000238947	567.782	0.0616002	0.00545783	558.808	0.0273275	0.000483498	573.24	0.0493342	0.00150917	537.161	0.0233382	0.00105218	567.602	0.0375265	-0.000128052	549.158	0.0269792	0.00207773	545.901	0.0241338	0.00328078
545.862	0.0260405	0.000519755	550.438	0.0275212	0.00208627	551.444	0.0192446	0.00258104	561.122	0.029896	-0.000169133	568.085	0.0632813	0.00554612	559.111	0.0275061	0.000588516	573.538	0.0498388	0.00169322	537.453	0.0236671	0.00112517	567.911	0.0375048	-7.02852e-05	549.446	0.0276091	0.00218418	546.174	0.0250569	0.00337378
546.162	0.0262187	0.00059411	550.728	0.0281572	0.00219745	551.732	0.0200152	0.0026818	561.433	0.0298669	-9.35118e-05	568.388	0.0649892	0.00563475	559.415	0.0277182	0.000698984	573.836	0.0504001	0.0018839	537.745	0.0240185	0.00120211	568.22	0.0375027	-6.52451e-06	549.735	0.0282708	0.00229429	546.448	0.0260055	0.00346747
546.462	0.0264206	0.000673237	551.017	0.0288265	0.0023124	552.019	0.0208155	0.00278503	561.744	0.0298632	-1.20205e-05	568.691	0.0667242	0.00572374	559.718	0.0279655	0.000814913	574.134	0.0510203	0.00208106	538.038	0.0243935	0.00128302	568.529	0.0375223	6.32967e-05	550.023	0.0289652	0.00240802	546.721	0.02698	0.00356174
546.762	0.0266476	0.000757176	551.306	0.0295301	0.00243105	552.306	0.0216462	0.00289067	562.054	0.0298866	7.53983e-05	568.994	0.0684862	0.00581313	560.022	0.0282497	0.000936308	574.432	0.0517011	0.00228455	538.33	0.0247933	0.00136794	568.838	0.0375653	0.000139235	550.311	0.0296935	0.00252532	546.995	0.0279804	0.00365648
547.062	0.0269013	0.000845959	551.596	0.0302692	0.00255335	552.594	0.0225079	0.00299866	562.365	0.029939	0.000168795	569.297	0.0702754	0.00590294	560.325	0.0285724	0.00106316	574.73	0.0524443	0.00249419	538.622	0.0252192	0.00145688	569.147	0.0376337	0.000221335	550.6	0.0304567	0.00264612	547.269	0.0290068	0.00375158
547.362	0.027183	0.000939612	551.885	0.0310446	0.00267923	552.881	0.0234013	0.00310895	562.675	0.0300223	0.00026821	569.6	0.0720921	0.0059932	560.629	0.0289352	0.00119546	575.028	0.0532518	0.00270981	538.915	0.0256722	0.00154983	569.456	0.0377293	0.000309633	550.888	0.0312556	0.00277035	547.542	0.0300592	0.00384692
547.661	0.0274943	0.00103815	552.175	0.0318575	0.00280861	553.168	0.0243271	0.00322145	562.986	0.0301384	0.00037368	569.904	0.0739362	0.00608394	560.932	0.0293398	0.00133319	575.326	0.0541253	0.00293119	539.207	0.0261535	0.00164681	569.764	0.0378542	0.000404151	551.177	0.0320914	0.00289793	547.816	0.0311378	0.00394236
547.961	0.0278366	0.00114158	552.464	0.0327088	0.00294139	553.456	0.0252857	0.0033361	563.296	0.030289	0.00048523	570.207	0.0758079	0.00617519	561.236	0.0297879	0.00147631	575.624	0.0550664	0.00315813	539.499	0.0266644	0.00174779	570.073	0.0380101	0.000504902	551.465	0.0329649	0.00302877	548.089	0.0322425	0.00403778
548.261	0.0282114	0.0012499	552.754	0.0335995	0.00307748	553.743	0.026278	0.00345278	563.607	0.0304762	0.000602876	570.51	0.0777075	0.00626697	561.539	0.030281	0.00162478	575.922	0.0560767	0.00339038	539.791	0.0272059	0.00185277	570.382	0.0381991	0.000611887	551.753	0.033877	0.00316277	548.363	0.0333733	0.00413303
548.561	0.0286202	0.0013631	553.043	0.0345306	0.00321676	554.031	0.0273043	0.00357142	563.917	0.0307019	0.000726629	570.813	0.0796351	0.0063593	561.843	0.0308208	0.00177855	576.22	0.0571577	0.00362771	540.084	0.0277793	0.00196171	570.691	0.0384231	0.000725093	552.042	0.0348287	0.0032998	548.636	0.03453	0.00422798
548.861	0.0290643	0.00148117	553.332	0.0355028	0.00335911	554.318	0.0283652	0.0036919	564.228	0.0309678	0.000856487	571.116	0.0815909	0.00645222	562.146	0.0314088	0.00193757	576.518	0.0583109	0.00386985	540.376	0.0283857	0.00207458	571	0.038684	0.000844496	552.33	0.0358207	0.00343975	548.91	0.0357126	0.00432248
549.161	0.0295453	0.00160407	553.622	0.0365171	0.0035044	554.605	0.0294612	0.0038141	564.538	0.031276	0.000992441	571.419	0.083575	0.00654573	562.45	0.0320467	0.00210175	576.816	0.0595376	0.00411652	540.668	0.0290262	0.00219132	571.309	0.0389836	0.000970059	552.619	0.0368539	0.00358249	549.184	0.0369209	0.00441638
549.461	0.0300646	0.00173177	553.911	0.0375742	0.00365248	554.893	0.0305928	0.0039379	564.849	0.0316283	0.00113447	571.722	0.0855876	0.00663984	562.753	0.0327359	0.00227103	577.114	0.060839	0.00436742	540.961	0.029702	0.00231189	571.618	0.0393239	0.00110173	552.907	0.037929	0.00372786	549.457	0.0381546	0.00450952
549.76	0.0306236	0.00186422	554.201	0.038675	0.0038032	555.18	0.0317604	0.00406316	565.159	0.0320265	0.00128254	572.025	0.0876289	0.00673458	563.057	0.0334781	0.0024453	577.412	0.0622164	0.00462224	541.253	0.0304141	0.00243622	571.927	0.0397068	0.00123945	553.195	0.0390467	0.00387571	549.731	0.0394136	0.00460175
550.06	0.0312237	0.00200135	554.49	0.0398201	0.00395639	555.467	0.0329644	0.00418975	565.47	0.0324726	0.00143662	572.328	0.0896991	0.00682993	563.36	0.0342746	0.00262446	577.71	0.0636708	0.00488066	541.545	0.0311636	0.00256422	572.236	0.040134	0.00138314	553.484	0.0402078	0.00402587	550.004	0.0406976	0.00469289
550.36	0.0318663	0.0021431	554.78	0.0410102	0.00411187	555.755	0.0342051	0.00431751	565.78	0.0329684	0.00159665	572.632	0.0917985	0.00692591	563.664	0.0351269	0.0028084	578.008	0.0652032	0.00514234	541.838	0.0319516	0.00269583	572.544	0.0406075	0.0015327	553.772	0.0414127	0.00417817	550.278	0.0420061	0.00478278
550.66	0.0325528	0.00228938	555.069	0.0422459	0.00426946	556.042	0.0354828	0.00444628	566.091	0.0335157	0.00176257	572.935	0.0939271	0.00702249	563.967	0.0360365	0.00299698	578.306	0.0668144	0.00540691	542.13	0.032779	0.00283093	572.853	0.0411289	0.00168803	554.061	0.0426622	0.00433241	550.552	0.0433388	0.00487126
550.96	0.0332845	0.00244011	555.358	0.0435278	0.00442895	556.329	0.0367978	0.00457589	566.401	0.0341164	0.0019343	573.238	0.0960851	0.00711967	564.271	0.0370047	0.00319007	578.604	0.0685052	0.00567401	542.422	0.033647	0.00296942	573.162	0.0417001	0.00184902	554.349	0.0439567	0.00448841	550.825	0.0446953	0.00495814
551.26	0.0340627	0.00259518	555.648	0.0448563	0.00459014	556.617	0.0381502	0.00470616	566.712	0.0347721	0.00211175	573.541	0.0982728	0.00721743	564.574	0.0380328	0.0033875	578.902	0.0702762	0.00594324	542.714	0.0345564	0.00311118	573.471	0.0423226	0.00201553	554.637	0.0452965	0.00464594	551.099	0.0460751	0.00504325
551.56	0.0348887	0.00275447	555.937	0.0462319	0.0047528	556.904	0.0395401	0.00483691	567.022	0.0354847	0.00229484	573.844	0.10049	0.00731573	564.878	0.0391221	0.00358913	579.2	0.072128	0.00621421	543.007	0.0355081	0.00325609	573.78	0.0429983	0.0021874	554.926	0.0466822	0.00480478	551.372	0.0474776	0.00512642
551.859	0.0357636	0.00291785	556.227	0.047655	0.00491671	557.192	0.0409677	0.00496793	567.333	0.0362559	0.00248343	574.147	0.102738	0.00741452	565.181	0.0402738	0.00379476	579.498	0.0740609	0.0064865	543.299	0.0365031	0.003404	574.089	0.0437287	0.00236448	555.214	0.048114	0.00496471	551.646	0.0489023	0.00520745
552.159	0.0366887	0.0030852	556.516	0.0491257	0.00508161	557.479	0.042433	0.00509904	567.643	0.0370873	0.00267742	574.45	0.105015	0.00751377	565.485	0.041489	0.0040042	579.796	0.0760753	0.00675967	543.591	0.0375421	0.00355476	574.398	0.0445153	0.00254659	555.503	0.0495922	0.00512549	551.92	0.0503486	0.00528617
552.459	0.0376652	0.00325634	556.806	0.0506445	0.00524727	557.766	0.0439359	0.00523001	567.954	0.0379805	0.00287665	574.753	0.107323	0.00761341	565.788	0.0427689	0.00421724	580.094	0.0781711	0.00703328	543.884	0.038626	0.0037082	574.707	0.0453597	0.00273352	555.791	0.0511169	0.00528686	552.193	0.0518157	0.00536239
552.759	0.038694	0.00343113	557.095	0.0522113	0.00541341	558.054	0.0454764	0.00536062	568.264	0.0389372	0.00308098	575.056	0.109661	0.00771337	566.092	0.0441146	0.00443366	580.392	0.0803485	0.00730688	544.176	0.0397555	0.00386416	575.016	0.0462632	0.00292508	556.079	0.0526883	0.00544856	552.467	0.0533029	0.00543593
553.059	0.0397763	0.00360937	557.384	0.0538262	0.00557976	558.341	0.0470542	0.00549065	568.575	0.0399589	0.00329023	575.36	0.112029	0.00781357	566.395	0.0455268	0.00465324	580.69	0.0826073	0.00757999	544.468	0.0409312	0.00402245	575.325	0.0472273	0.00312104	556.368	0.0543063	0.00561032	552.74	0.0548095	0.00550661
553.359	0.040913	0.00379089	557.674	0.0554893	0.00574605	558.628	0.0486692	0.00561987	568.886	0.0410471	0.00350422	575.663	0.114428	0.00791391	566.699	0.0470066	0.00487571	580.988	0.0849472	0.00785213	544.76	0.0421539	0.00418286	575.633	0.0482532	0.00332115	556.656	0.0559709	0.00577187	553.014	0.0563345	0.00557422
553.659	0.0421051	0.00397547	557.963	0.0572004	0.00591199	558.916	0.050321	0.00574803	569.196	0.0422031	0.00372276	575.966	0.116857	0.0080143	567.002	0.0485546	0.00510081	581.286	0.0873677	0.00812281	545.053	0.0434239	0.0043452	575.942	0.0493421	0.00352516	556.944	0.0576819	0.00593292	553.288	0.0578772	0.0056386
553.958	0.0433534	0.00416291	558.253	0.0589594	0.00607727	559.203	0.0520092	0.00587488	569.507	0.0434283	0.00394564	576.269	0.119317	0.0081146	567.306	0.0501718	0.00532827	581.584	0.0898683	0.00839152	545.345	0.044742	0.00450925	576.251	0.0504951	0.0037328	557.233	0.0594392	0.00609317	553.561	0.0594365	0.00569955
554.258	0.0446587	0.00435296	558.542	0.0607659	0.00624158	559.49	0.0537334	0.00600018	569.817	0.044724	0.00417261	576.572	0.121807	0.00821469	567.609	0.0518585	0.0055578	581.882	0.0924482	0.00865775	545.637	0.0461084	0.00467477	576.56	0.0517133	0.00394378	557.521	0.0612423	0.00625231	553.835	0.0610115	0.00575689
554.558	0.0460217	0.0045454	558.832	0.0626196	0.00640462	559.778	0.0554932	0.00612365	570.128	0.0460913	0.00440345	576.875	0.124327	0.00831443	567.913	0.0536155	0.00578908	582.18	0.0951066	0.00892098	545.93	0.0475235	0.00484152	576.869	0.0529977	0.00415781	557.81	0.063091	0.00641005	554.108	0.0626012	0.00581043
554.858	0.047443	0.00473996	559.121	0.06452	0.00656607	560.065	0.0572878	0.00624505	570.438	0.0475315	0.00463789	577.178	0.126877	0.00841365	568.216	0.0554431	0.00602179	582.478	0.0978424	0.00918067	546.222	0.0489877	0.00500926	577.178	0.0543489	0.00437456	558.098	0.0649846	0.00656606	554.382	0.0642045	0.00586001
555.158	0.0489232	0.00493639	559.41	0.0664666	0.00672559	560.353	0.0591166	0.0063641	570.749	0.0490455	0.00487565	577.481	0.129458	0.00851219	568.52	0.0573417	0.00625561	582.776	0.100654	0.00943628	546.514	0.0505011	0.00517772	577.487	0.0557679	0.00459369	558.386	0.0669227	0.00672001	554.655	0.0658201	0.00590544
555.458	0.0504628	0.00513439	559.7	0.0684587	0.00688285	560.64	0.0609789	0.00648052	571.059	0.0506343	0.00511645	577.784	0.132067	0.00860985	568.823	0.0593114	0.00649018	583.074	0.103541	0.00968728	546.807	0.0520639	0.00534663	577.796	0.0572552	0.00481488	558.675	0.0689044	0.00687158	554.929	0.067447	0.00594654
555.758	0.0520621	0.00533367	559.989	0.0704956	0.00703751	560.927	0.0628738	0.00659404	571.37	0.0522986	0.00535996	578.088	0.134706	0.00870645	569.127	0.0613525	0.00672513	583.372	0.106501	0.0099331	547.099	0.0536761	0.00551571	578.105	0.0588113	0.00503775	558.963	0.0709291	0.00702044	555.203	0.069084	0.00598315
556.057	0.0537215	0.00553394	560.279	0.0725763	0.00718923	561.215	0.0648004	0.00670438	571.68	0.0540394	0.00560588	578.391	0.137374	0.00880176	569.43	0.0634648	0.0069601	583.67	0.109533	0.0101732	547.391	0.0553377	0.00568466	578.413	0.0604367	0.00526193	559.252	0.0729958	0.00716625	555.476	0.0707296	0.00601509
556.357	0.0554412	0.00573487	560.568	0.0747001	0.00733766	561.502	0.0667577	0.00681126	571.991	0.0558571	0.00585385	578.694	0.140071	0.00889555	569.734	0.0656484	0.00719469	583.968	0.112634	0.010407	547.683	0.0570486	0.0058532	578.722	0.0621316	0.00548703	559.54	0.0751036	0.00730867	555.75	0.0723827	0.00604221
556.657	0.0572212	0.00593614	560.858	0.0768657	0.00748245	561.789	0.0687446	0.00691439	572.301	0.0577524	0.00610353	578.997	0.142795	0.0089876	570.037	0.0679029	0.0074285	584.266	0.115803	0.010634	547.976	0.0588085	0.00602101	579.031	0.0638962	0.00571265	559.828	0.0772514	0.00744734	556.023	0.0740419	0.00606436
556.957	0.0590615	0.00613741	561.147	0.0790721	0.00762324	562.077	0.0707601	0.00701349	572.612	0.0597256	0.00635453	579.3	0.145546	0.00907763	570.341	0.0702281	0.00766112	584.564	0.119037	0.0108536	548.268	0.0606172	0.00618777	579.34	0.0657305	0.00593837	560.117	0.079438	0.00758194	556.297	0.0757057	0.00608137
557.257	0.0609621	0.00633832	561.436	0.081318	0.00775969	562.364	0.0728027	0.00710829	572.922	0.0617771	0.00660647	579.603	0.148325	0.00916539	570.644	0.0726233	0.00789212	584.862	0.122334	0.0110652	548.56	0.0624742	0.00635316	579.649	0.0676345	0.00616377	560.405	0.0816622	0.00771211	556.571	0.0773727	0.0060931
557.557	0.0629228	0.00653852	561.726	0.0836021	0.00789143	562.651	0.0748713	0.00719848	573.233	0.0639069	0.00685895	579.906	0.151129	0.00925058	570.948	0.075088	0.00812106	585.16	0.125692	0.0112683	548.853	0.064379	0.00651685	579.958	0.0696078	0.00638842	560.694	0.0839225	0.0078375	556.844	0.0790414	0.00609942
557.857	0.0649431	0.00673763	562.015	0.0859227	0.00801811	562.939	0.0769644	0.00728379	573.543	0.0661152	0.00711154	580.209	0.153958	0.00933293	571.251	0.0776215	0.0083475	585.458	0.129108	0.0114623	549.145	0.0663311	0.00667851	580.267	0.0716502	0.00661185	560.982	0.0862175	0.00795776	557.118	0.0807104	0.00610019
558.156	0.0670227	0.00693527	562.305	0.0882785	0.00813937	563.226	0.0790806	0.00736395	573.854	0.0684018	0.00736382	580.512	0.15681	0.00941212	571.555	0.0802227	0.00857097	585.756	0.132578	0.0116467	549.437	0.0683297	0.00683778	580.576	0.0737611	0.00683362	561.27	0.0885456	0.00807256	557.391	0.082378	0.00609528
558.456	0.069161	0.00713106	562.594	0.0906677	0.00825487	563.514	0.0812182	0.00743866	574.164	0.0707666	0.00761532	580.816	0.159686	0.00948784	571.858	0.0828908	0.00879103	586.054	0.136101	0.0118209	549.729	0.0703741	0.00699432	580.885	0.0759398	0.00705325	561.559	0.0909052	0.00818154	557.665	0.0840427	0.00608459
558.756	0.0713574	0.00732459	562.884	0.0930886	0.00836424	563.801	0.0833756	0.00750767	574.475	0.073209	0.00786559	581.119	0.162584	0.00955976	572.162	0.0856244	0.00900718	586.352	0.139672	0.0119844	550.022	0.0724634	0.00714777	581.194	0.0781855	0.00727027	561.847	0.0932943	0.00828437	557.939	0.0857028	0.00606801
559.056	0.0736109	0.00751547	563.173	0.0955393	0.00846715	564.088	0.0855512	0.00757069	574.785	0.0757286	0.00811416	581.422	0.165502	0.00962754	572.465	0.0884224	0.00921895	586.65	0.143289	0.0121367	550.314	0.0745965	0.00729778	581.502	0.0804974	0.00748419	562.136	0.0957113	0.00838071	558.212	0.0873568	0.00604543
559.356	0.0759208	0.00770327	563.462	0.0980177	0.00856325	564.376	0.087743	0.00762747	575.096	0.0783247	0.00836053	581.725	0.16844	0.00969083	572.769	0.0912831	0.00942586	586.948	0.146947	0.0122773	550.606	0.0767724	0.007444	581.811	0.0828741	0.00769452	562.424	0.0981541	0.00847023	558.486	0.0890029	0.00601676
559.656	0.078286	0.00788759	563.752	0.100522	0.0086522	564.663	0.0899494	0.00767774	575.406	0.0809965	0.00860421	582.028	0.171395	0.00974929	573.072	0.094205	0.0096274	587.246	0.150644	0.0124056	550.899	0.0789897	0.00758605	582.12	0.0853146	0.00790076	562.712	0.100621	0.0085526	558.759	0.0906395	0.00598193
559.956	0.0807052	0.00806799	564.041	0.10305	0.00873367	564.95	0.0921682	0.00772126	575.717	0.083743	0.00884468	582.331	0.174366	0.00980255	573.376	0.0971862	0.00982309	587.544	0.154375	0.0125212	551.191	0.0812473	0.00772357	582.429	0.0878174	0.00810241	563.001	0.103109	0.00862751	559.033	0.0922649	0.00594086
560.255	0.0831773	0.00824405	564.331	0.105599	0.00880735	565.238	0.0943975	0.00775778	576.028	0.086563	0.00908142	582.634	0.177352	0.00985025	573.679	0.100225	0.0100124	587.842	0.158137	0.0126236	551.483	0.0835436	0.00785619	582.738	0.0903809	0.00829897	563.289	0.105616	0.00869465	559.307	0.0938773	0.00589349
560.555	0.0857007	0.00841535	564.62	0.108167	0.00887292	565.525	0.0966352	0.00778707	576.338	0.0894551	0.0093139	582.937	0.18035	0.00989201	573.982	0.103319	0.0101949	588.14	0.161925	0.0127123	551.776	0.0858772	0.00798356	583.047	0.0930034	0.00848993	563.578	0.108141	0.00875371	559.58	0.095475	0.00583979
560.855	0.0882739	0.00858144	564.91	0.110752	0.00893007	565.812	0.0988792	0.00780889	576.649	0.092418	0.00954159	583.24	0.183359	0.00992746	574.286	0.106466	0.01037	588.438	0.165735	0.0127869	552.068	0.0882463	0.00810532	583.356	0.095683	0.00867477	563.866	0.11068	0.00880441	559.854	0.0970562	0.0057797
561.155	0.0908953	0.00874189	565.199	0.11335	0.0089785	566.1	0.101127	0.00782305	576.959	0.0954499	0.00976394	583.544	0.186377	0.00995623	574.589	0.109664	0.0105373	588.736	0.169564	0.012847	552.36	0.0906493	0.00822109	583.665	0.0984177	0.008853	564.154	0.113231	0.00884646	560.127	0.0986193	0.0057132
561.455	0.0935629	0.00889627	565.488	0.11596	0.00901795	566.387	0.103377	0.00782932	577.27	0.098549	0.0099804	583.847	0.189402	0.00997793	574.893	0.112911	0.0106962	589.034	0.173405	0.0128922	552.652	0.0930843	0.00833052	583.974	0.101205	0.0090241	564.443	0.115792	0.00887959	560.401	0.100162	0.00564027
561.755	0.0962749	0.00904415	565.778	0.118579	0.00904813	566.675	0.105627	0.00782752	577.58	0.101713	0.0101904	584.15	0.19243	0.00999218	575.196	0.116202	0.0108462	589.332	0.177256	0.0129222	552.945	0.0955493	0.00843326	584.282	0.104043	0.00918757	564.731	0.11836	0.00890355	560.674	0.101684	0.00556092
562.055	0.0990291	0.00918508	566.067	0.121204	0.0090688	566.962	0.107873	0.00781748	577.891	0.104941	0.0103934	584.453	0.195461	0.00999862	575.5	0.119537	0.0109869	589.63	0.181111	0.0129364	553.237	0.0980422	0.00852897	584.591	0.106929	0.0093429	565.02	0.120932	0.00891809	560.948	0.103182	0.00547515
562.355	0.101823	0.00931865	566.357	0.123832	0.0090797	567.249	0.110114	0.00779901	578.201	0.108229	0.0105888	584.756	0.198491	0.00999687	575.803	0.122911	0.0111178	589.928	0.184966	0.0129348	553.529	0.100561	0.00861729	584.9	0.10986	0.00948961	565.308	0.123505	0.00892299	561.222	0.104655	0.00538297
562.654	0.104655	0.00944443	566.646	0.12646	0.00908061	567.537	0.112348	0.00777197	578.512	0.111575	0.0107762	585.059	0.201518	0.00998657	576.107	0.126322	0.0112384	590.226	0.188815	0.0129169	553.822	0.103103	0.00869789	585.209	0.112834	0.00962721	565.596	0.126077	0.00891803	561.495	0.1061	0.00528444
562.954	0.107523	0.009562	566.936	0.129086	0.00907132	567.824	0.114571	0.00773622	578.822	0.114977	0.0109548	585.362	0.204539	0.00996734	576.41	0.129766	0.0113482	590.524	0.192654	0.0128825	554.114	0.105667	0.00877045	585.518	0.115848	0.00975521	565.885	0.128645	0.00890302	561.769	0.107517	0.00517958
563.254	0.110423	0.00967095	567.225	0.131705	0.00905165	568.111	0.116781	0.00769164	579.133	0.118431	0.0111242	585.665	0.207552	0.00993885	576.714	0.13324	0.0114468	590.822	0.196477	0.0128313	554.406	0.108249	0.00883465	585.827	0.118897	0.00987314	566.173	0.131205	0.00887777	562.042	0.108904	0.00506845
563.554	0.113352	0.00977086	567.514	0.134316	0.0090214	568.399	0.118976	0.00763812	579.443	0.121935	0.0112838	585.968	0.210553	0.00990075	577.017	0.136741	0.0115338	591.12	0.200281	0.0127632	554.698	0.110848	0.00889018	586.136	0.12198	0.00998056	566.462	0.133755	0.00884213	562.316	0.110259	0.00495114
563.854	0.116309	0.00986136	567.804	0.136916	0.00898042	568.686	0.121153	0.00757556	579.754	0.125485	0.011433	586.272	0.21354	0.00985271	577.321	0.140264	0.0116086	591.418	0.204058	0.012678	554.991	0.11346	0.00893674	586.445	0.125093	0.010077	566.75	0.136292	0.00879594	562.59	0.111579	0.00482771
564.154	0.119291	0.00994205	568.093	0.1395	0.00892859	568.973	0.123309	0.00750391	580.064	0.129078	0.0115714	586.575	0.216508	0.00979441	577.624	0.143806	0.011671	591.716	0.207806	0.0125755	555.283	0.116083	0.00897405	586.754	0.128232	0.0101621	567.038	0.138812	0.0087391	562.863	0.112865	0.00469827
564.454	0.122293	0.0100126	568.383	0.142066	0.00886577	569.261	0.125442	0.00742309	580.375	0.132711	0.0116984	586.878	0.219456	0.00972555	577.928	0.147363	0.0117204	592.014	0.211518	0.0124556	555.575	0.118714	0.00900185	587.063	0.131394	0.0102353	567.327	0.141313	0.00867148	563.137	0.114113	0.00456292
564.753	0.125313	0.0100725	568.672	0.144611	0.00879187	569.548	0.12755	0.00733307	580.685	0.136379	0.0118135	587.181	0.22238	0.00964584	578.231	0.150931	0.0117566	592.312	0.215188	0.0123184	555.868	0.121351	0.00901987	587.371	0.134574	0.0102963	567.615	0.143791	0.00859301	563.41	0.115323	0.00442178
565.053	0.128348	0.0101216	568.962	0.147131	0.00870683	569.836	0.129628	0.00723384	580.996	0.140079	0.0119162	587.484	0.225276	0.00955501	578.535	0.154506	0.0117792	592.61	0.218813	0.0121636	556.16	0.123989	0.00902786	587.68	0.13777	0.0103448	567.904	0.146244	0.00850363	563.684	0.116493	0.00427498
565.353	0.131395	0.0101595	569.251	0.149623	0.00861057	570.123	0.131676	0.00712538	581.306	0.143808	0.0120059	587.787	0.228142	0.00945282	578.838	0.158084	0.0117878	592.908	0.222386	0.0119914	556.452	0.126628	0.00902562	587.989	0.140976	0.0103803	568.192	0.148667	0.00840329	563.958	0.11762	0.00412268
565.653	0.134449	0.0101859	569.541	0.152084	0.00850307	570.41	0.13369	0.00700773	581.617	0.147559	0.0120823	588.09	0.230972	0.00933903	579.142	0.16166	0.0117821	593.206	0.225903	0.0118018	556.745	0.129262	0.00901292	588.298	0.144189	0.0104026	568.48	0.151059	0.00829198	564.231	0.118705	0.00396502
565.953	0.137508	0.0102004	569.83	0.15451	0.00838433	570.698	0.135667	0.00688091	581.927	0.151331	0.0121448	588.393	0.233765	0.00921344	579.445	0.165229	0.0117618	593.504	0.229358	0.0115948	557.037	0.13189	0.00898959	588.607	0.147405	0.0104112	568.769	0.153415	0.00816969	564.505	0.119745	0.00380216
566.253	0.140567	0.0102028	570.119	0.1569	0.00825436	570.985	0.137605	0.00674499	582.238	0.155117	0.0121931	588.696	0.236516	0.00907586	579.749	0.168788	0.0117268	593.802	0.232747	0.0113706	557.329	0.134507	0.00895544	588.916	0.15062	0.010406	569.057	0.155732	0.00803646	564.778	0.12074	0.0036343
566.553	0.143624	0.0101929	570.409	0.159248	0.00811319	571.272	0.139502	0.00660003	582.548	0.158913	0.0122267	589	0.239222	0.00892613	580.052	0.172332	0.0116767	594.1	0.236063	0.0111293	557.621	0.137112	0.00891032	589.225	0.153828	0.0103866	569.346	0.158009	0.00789233	565.052	0.121687	0.00346162
566.852	0.146673	0.0101705	570.698	0.161552	0.0079609	571.56	0.141354	0.00644614	582.859	0.162716	0.0122452	589.303	0.241878	0.00876414	580.356	0.175856	0.0116113	594.398	0.239303	0.0108712	557.914	0.1397	0.00885411	589.534	0.157026	0.0103529	569.634	0.16024	0.00773738	565.325	0.122585	0.00328431
567.152	0.149712	0.0101352	570.988	0.163809	0.00779755	571.847	0.14316	0.00628344	583.169	0.166519	0.0122484	589.606	0.244482	0.00858976	580.659	0.179356	0.0115305	594.696	0.24246	0.0105964	558.206	0.142268	0.00878669	589.843	0.160209	0.0103046	569.922	0.162424	0.00757169	565.599	0.123434	0.0031026
567.452	0.152737	0.0100869	571.277	0.166015	0.00762328	572.135	0.144916	0.00611205	583.48	0.170319	0.0122357	589.909	0.247029	0.00840292	580.963	0.182826	0.0114341	594.994	0.245531	0.0103053	558.498	0.144813	0.00870798	590.151	0.163372	0.0102416	570.211	0.164557	0.0073954	565.873	0.124232	0.00291669
567.752	0.155743	0.0100255	571.567	0.168168	0.0074382	572.422	0.146621	0.00593214	583.791	0.174109	0.0122071	590.212	0.249515	0.00820359	581.266	0.186262	0.0113221	595.292	0.24851	0.00999804	558.791	0.147332	0.0086179	590.46	0.166512	0.0101637	570.499	0.166635	0.00720864	566.146	0.124978	0.00272682
568.052	0.158727	0.00995086	571.856	0.170264	0.00724249	572.709	0.148272	0.00574388	584.101	0.177886	0.012162	590.515	0.251938	0.00799174	581.57	0.189659	0.0111942	595.59	0.251393	0.00967512	559.083	0.149822	0.00851642	590.769	0.169623	0.0100707	570.788	0.168658	0.00701158	566.42	0.125671	0.00253323
568.352	0.161685	0.0098628	572.145	0.172301	0.00703631	572.997	0.149866	0.00554746	584.412	0.181643	0.0121004	590.818	0.254292	0.00776738	581.873	0.193013	0.0110506	595.888	0.254176	0.00933687	559.375	0.152278	0.00840352	591.078	0.1727	0.00996274	571.076	0.17062	0.0068044	566.693	0.12631	0.00233616
568.652	0.164612	0.00976128	572.435	0.174275	0.00681989	573.284	0.151401	0.00534309	584.722	0.185376	0.0120221	591.121	0.256575	0.00753058	582.177	0.196319	0.0108911	596.186	0.256853	0.00898372	559.668	0.154698	0.00827919	591.387	0.17574	0.0098396	571.364	0.17252	0.00658733	566.967	0.126895	0.00213587
568.951	0.167504	0.00964624	572.724	0.176183	0.00659344	573.571	0.152876	0.00513102	585.033	0.18908	0.0119268	591.425	0.258782	0.0072814	582.48	0.199571	0.0107159	596.484	0.25942	0.00861612	559.96	0.157078	0.00814347	591.696	0.178736	0.00970132	571.653	0.174354	0.00636059	567.241	0.127424	0.00193263
569.251	0.170358	0.00951765	573.014	0.178023	0.00635722	573.859	0.154287	0.00491148	585.343	0.192749	0.0118143	591.728	0.26091	0.00701996	582.784	0.202765	0.0105249	596.782	0.261874	0.00823456	560.252	0.159416	0.0079964	592.005	0.181686	0.00954792	571.941	0.17612	0.00612445	567.514	0.127896	0.00172669
569.551	0.173169	0.00937552	573.303	0.179792	0.00611151	574.146	0.155633	0.00468475	585.654	0.196377	0.0116847	592.031	0.262955	0.00674641	583.087	0.205897	0.0103182	597.08	0.26421	0.00783958	560.544	0.161707	0.00783807	592.314	0.184583	0.00937946	572.23	0.177816	0.00587918	567.788	0.128311	0.00151833
569.851	0.175934	0.00921988	573.593	0.181487	0.00585661	574.433	0.156912	0.00445112	585.964	0.19996	0.0115379	592.334	0.264913	0.00646093	583.391	0.208961	0.010096	597.378	0.266425	0.00743173	560.837	0.163948	0.00766858	592.623	0.187423	0.00919604	572.518	0.179438	0.00562508	568.061	0.128669	0.00130784
570.151	0.178648	0.00905079	573.882	0.183106	0.00559284	574.721	0.158122	0.00421087	586.275	0.203491	0.0113737	592.637	0.266781	0.00616374	583.694	0.211953	0.00985851	597.676	0.268514	0.00701161	561.129	0.166137	0.00748805	592.932	0.190203	0.00899778	572.806	0.180985	0.00536247	568.335	0.128969	0.00109549
570.451	0.181307	0.00886836	574.171	0.184646	0.00532053	575.008	0.159262	0.00396434	586.585	0.206967	0.0111923	592.94	0.268556	0.00585508	583.998	0.214868	0.00960585	597.974	0.270475	0.00657985	561.421	0.16827	0.00729664	593.24	0.192916	0.00878485	573.095	0.182453	0.0050917	568.609	0.12921	0.000881591
570.751	0.183908	0.0086727	574.461	0.186104	0.00504005	575.296	0.160328	0.00371185	586.896	0.210381	0.0109937	593.243	0.270234	0.00553524	584.301	0.217702	0.00933829	598.272	0.272304	0.00613708	561.714	0.170343	0.00709452	593.549	0.19556	0.00855746	573.383	0.183841	0.00481313	568.882	0.129392	0.000666419
571.05	0.186446	0.00846396	574.75	0.18748	0.00475178	575.583	0.161321	0.00345375	587.206	0.213727	0.010778	593.546	0.271812	0.00520453	584.605	0.220451	0.0090561	598.57	0.273998	0.00568401	562.006	0.172355	0.00688189	593.858	0.198128	0.00831583	573.672	0.185147	0.00452714	569.156	0.129516	0.000450276
571.35	0.188917	0.00824234	575.04	0.188769	0.00445613	575.87	0.162238	0.00319041	587.517	0.217002	0.0105453	593.849	0.273286	0.0048633	584.908	0.223109	0.00875961	598.868	0.275554	0.00522132	562.298	0.174301	0.00665899	594.167	0.200618	0.00806024	573.96	0.186368	0.00423412	569.429	0.12958	0.00023346
571.65	0.191319	0.00800806	575.329	0.189971	0.0041535	576.158	0.163077	0.0029222	587.827	0.220199	0.0102958	594.153	0.274653	0.00451193	585.212	0.225674	0.00844916	599.166	0.276969	0.00474975	562.59	0.176179	0.00642605	594.476	0.203025	0.00779101	574.248	0.187503	0.0039345	569.703	0.129584	1.62708e-05
571.95	0.193646	0.00776135	575.619	0.191084	0.00384434	576.445	0.163839	0.00264949	588.138	0.223313	0.0100297	594.456	0.275911	0.00415084	585.515	0.22814	0.00812514	599.464	0.278241	0.00427006	562.883	0.177987	0.00618335	594.785	0.205344	0.00750847	574.537	0.188549	0.00362869	569.977	0.129529	-0.000200991
572.25	0.195896	0.0075025	575.908	0.192106	0.0035291	576.732	0.164521	0.00237271	588.448	0.22634	0.00974734	594.759	0.277057	0.00378047	585.819	0.230503	0.00778797	599.762	0.279369	0.00378302	563.175	0.17972	0.00593119	595.094	0.207572	0.00721301	574.825	0.189506	0.00331716	570.25	0.129415	-0.000418024
572.55	0.198064	0.00723182	576.197	0.193034	0.00320824	577.02	0.165122	0.00209224	588.759	0.229274	0.00944897	595.062	0.278088	0.00340129	586.122	0.232761	0.0074381	600.06	0.280349	0.00328943	563.467	0.181378	0.0056699	595.403	0.209705	0.00690504	575.114	0.190371	0.00300035	570.524	0.129241	-0.000634527
572.85	0.200148	0.00694964	576.487	0.193868	0.00288224	577.307	0.165642	0.00180851	589.069	0.232111	0.00913495	595.365	0.279002	0.0030138	586.426	0.234908	0.00707601	600.358	0.28118	0.00279008	563.76	0.182956	0.0053998	595.712	0.211739	0.006585	575.402	0.191144	0.00267875	570.797	0.129008	-0.000850202
573.149	0.202144	0.00665632	576.776	0.194607	0.0025516	577.594	0.166079	0.00152195	589.38	0.234845	0.00880567	595.668	0.279796	0.00261854	586.729	0.236942	0.00670223	600.656	0.281861	0.00228581	564.052	0.184453	0.00512127	596.02	0.213671	0.00625337	575.69	0.191822	0.00235283	571.071	0.128717	-0.00106475
573.449	0.204049	0.00635226	577.066	0.195248	0.00221682	577.882	0.166433	0.00123297	589.69	0.237473	0.00846154	595.971	0.280467	0.00221607	587.033	0.23886	0.00631731	600.954	0.282391	0.00177745	564.344	0.185866	0.00483468	596.329	0.215497	0.00591067	575.979	0.192406	0.0020231	571.344	0.128367	-0.00127788
573.749	0.205859	0.00603789	577.355	0.195792	0.00187841	578.169	0.166704	0.000942038	590.001	0.239989	0.00810305	596.274	0.281015	0.00180696	587.336	0.240657	0.00592181	601.252	0.282768	0.00126584	564.637	0.187193	0.00454044	596.638	0.217213	0.00555742	576.267	0.192893	0.00169005	571.618	0.12796	-0.00148929
574.049	0.207573	0.00571364	577.645	0.196237	0.0015369	578.457	0.166891	0.000649579	590.311	0.242389	0.0077307	596.577	0.281437	0.00139182	587.64	0.242331	0.00551636	601.55	0.282992	0.00075185	564.929	0.188432	0.00423898	596.947	0.218818	0.00519419	576.556	0.193284	0.0013542	571.892	0.127495	-0.00169871
574.349	0.209186	0.00537999	577.934	0.196582	0.00119282	578.744	0.166993	0.000356045	590.622	0.24467	0.00734502	596.881	0.281731	0.000971282	587.943	0.243879	0.00510159	601.848	0.283063	0.000236324	565.221	0.189581	0.00393073	597.256	0.220307	0.00482159	576.844	0.193577	0.00101608	572.165	0.126974	-0.00190584
574.649	0.210696	0.00503744	578.223	0.196827	0.000846705	579.031	0.167011	6.18853e-05	590.933	0.246827	0.00694661	597.184	0.281897	0.000545986	588.247	0.245299	0.00467814	602.146	0.282979	-0.000279871	565.513	0.190638	0.00361616	597.565	0.221679	0.00444022	577.132	0.193772	0.000676193	572.439	0.126396	-0.00211041
574.949	0.212102	0.0046865	578.513	0.196972	0.000499097	579.319	0.166944	-0.000232449	591.243	0.248857	0.00653607	597.487	0.281932	0.000116599	588.55	0.246588	0.00424671	602.444	0.282742	-0.000795872	565.806	0.191602	0.00329572	597.874	0.22293	0.00405073	577.421	0.193868	0.000335082	572.712	0.125764	-0.00231214
575.248	0.213399	0.00432772	578.802	0.197015	0.000150541	579.606	0.166793	-0.000526505	591.554	0.250755	0.00611406	597.79	0.281836	-0.000316197	588.854	0.247744	0.003808	602.742	0.282352	-0.00131082	566.098	0.19247	0.00296992	598.183	0.224059	0.00365379	577.709	0.193866	-6.72252e-06	572.986	0.125077	-0.00251078
575.548	0.214587	0.00396166	579.092	0.196958	-0.000198414	579.893	0.166557	-0.000819833	591.864	0.25252	0.00568125	598.093	0.281608	-0.000751705	589.157	0.248764	0.00336272	603.04	0.281808	-0.00182385	566.39	0.193241	0.00263925	598.492	0.225062	0.00325008	577.998	0.193766	-0.000348689	573.26	0.124337	-0.00270606
575.848	0.215663	0.00358889	579.381	0.196799	-0.000547222	580.181	0.166237	-0.00111198	592.175	0.254146	0.00523836	598.396	0.281248	-0.00118922	589.461	0.249648	0.00291163	603.338	0.281113	-0.00233412	566.683	0.193915	0.00230423	598.801	0.22594	0.0028403	578.286	0.193567	-0.000690283	573.533	0.123544	-0.00289773
576.148	0.216626	0.00321003	579.671	0.19654	-0.000895335	580.468	0.165834	-0.00140251	592.485	0.255632	0.00478612	598.699	0.280754	-0.00162802	589.764	0.250393	0.00245547	603.636	0.280266	-0.00284078	566.975	0.194489	0.00196538	599.109	0.226689	0.00242517	578.574	0.193269	-0.00103097	573.807	0.1227	-0.00308554
576.448	0.217473	0.00282567	579.96	0.196181	-0.00124221	580.755	0.165348	-0.00169097	592.796	0.256976	0.0043253	599.002	0.280128	-0.00206737	590.068	0.250999	0.00199502	603.934	0.27927	-0.003343	567.267	0.194964	0.00162323	599.418	0.227308	0.00200544	578.863	0.192874	-0.00137023	574.08	0.121805	-0.00326928
576.748	0.218204	0.00243646	580.249	0.195721	-0.0015873	581.043	0.16478	-0.00197693	593.106	0.258173	0.00385669	599.305	0.279368	-0.00250656	590.371	0.251463	0.00153105	604.232	0.278126	-0.00383995	567.559	0.195337	0.00127832	599.727	0.227797	0.00158184	579.151	0.192382	-0.00170753	574.354	0.120862	-0.00344869
577.048	0.218817	0.00204303	580.539	0.195163	-0.00193007	581.33	0.164131	-0.00225996	593.417	0.259223	0.00338109	599.609	0.278475	-0.00294483	590.675	0.251786	0.00106437	604.53	0.276835	-0.00433085	567.852	0.195609	0.000931213	600.036	0.228154	0.00115513	579.44	0.191793	-0.00204235	574.628	0.11987	-0.00362359
577.347	0.21931	0.00164603	580.828	0.194506	-0.00227	581.618	0.163401	-0.00253963	593.727	0.260123	0.00289935	599.912	0.27745	-0.00338146	590.978	0.251967	0.000595763	604.828	0.2754	-0.00481489	568.144	0.19578	0.000582452	600.345	0.228378	0.000726081	579.728	0.191108	-0.00237418	574.901	0.118832	-0.00379375
577.647	0.219684	0.00124612	581.118	0.193751	-0.00260655	581.905	0.162592	-0.00281553	594.038	0.260872	0.0024123	600.215	0.276294	-0.0038157	591.282	0.252006	0.000126037	605.126	0.273824	-0.00529131	568.436	0.195848	0.000232596	600.654	0.228469	0.000295462	580.016	0.190329	-0.00270251	575.175	0.117749	-0.00395898
577.947	0.219937	0.000843986	581.407	0.192901	-0.00293922	582.192	0.161705	-0.00308727	594.348	0.261469	0.00192081	600.518	0.275007	-0.00424683	591.585	0.251901	-0.000344003	605.423	0.272107	-0.00575936	568.729	0.195813	-0.000117794	600.963	0.228427	-0.000135953	580.305	0.189456	-0.00302685	575.448	0.116622	-0.00411909
578.247	0.220069	0.000440288	581.697	0.191955	-0.0032675	582.48	0.160741	-0.00335443	594.659	0.261912	0.00142576	600.821	0.27359	-0.0046741	591.889	0.251654	-0.000813551	605.721	0.270254	-0.00621832	569.021	0.195676	-0.000468156	601.272	0.228252	-0.000567387	580.593	0.188491	-0.00334671	575.722	0.115453	-0.00427392
578.547	0.22008	3.57081e-05	581.986	0.190916	-0.0035909	582.767	0.159702	-0.00361664	594.969	0.2622	0.000928035	601.124	0.272045	-0.00509681	592.192	0.251265	-0.0012818	606.019	0.268267	-0.00666749	569.313	0.195437	-0.00081793	601.581	0.227944	-0.000998066	580.882	0.187435	-0.00366162	575.995	0.114243	-0.00442331
578.847	0.219969	-0.000369073	582.275	0.189784	-0.00390894	583.054	0.158589	-0.00387354	595.28	0.262333	0.000428522	601.427	0.270373	-0.00551423	592.496	0.250735	-0.00174795	606.317	0.26615	-0.00710619	569.606	0.195096	-0.00116656	601.889	0.227503	-0.00142722	581.17	0.186289	-0.00397111	576.269	0.112993	-0.00456709
579.147	0.219737	-0.000773375	582.565	0.188563	-0.00422116	583.342	0.157403	-0.00412476	595.59	0.262311	-7.18789e-05	601.73	0.268577	-0.00592568	592.799	0.250064	-0.00221121	606.615	0.263905	-0.00753379	569.898	0.194654	-0.00151348	602.198	0.22693	-0.00185407	581.458	0.185057	-0.00427474	576.543	0.111706	-0.00470514
579.446	0.219384	-0.00117652	582.854	0.187252	-0.0045271	583.629	0.156147	-0.00436996	595.901	0.262133	-0.000572268	602.033	0.266659	-0.00633045	593.103	0.249253	-0.0026708	606.913	0.261536	-0.00794966	570.19	0.194111	-0.00185815	602.507	0.226227	-0.00227787	581.747	0.183738	-0.00457207	576.816	0.110383	-0.00483732
579.746	0.218911	-0.00157783	583.144	0.185855	-0.00482633	583.916	0.154823	-0.00460881	596.211	0.2618	-0.00107175	602.337	0.264619	-0.00672789	593.406	0.248304	-0.00312593	607.211	0.259047	-0.00835323	570.482	0.193468	-0.00220003	602.816	0.225393	-0.00269787	582.035	0.182336	-0.0048627	577.09	0.109025	-0.00496352
580.046	0.218318	-0.00197664	583.433	0.184374	-0.00511844	584.204	0.153432	-0.00484101	596.522	0.261313	-0.00156942	602.64	0.262462	-0.00711733	593.71	0.247219	-0.00357585	607.509	0.256441	-0.00874394	570.775	0.192726	-0.00253857	603.125	0.224432	-0.00311333	582.324	0.180851	-0.00514621	577.363	0.107634	-0.00508364
580.346	0.217607	-0.00237228	583.723	0.18281	-0.00540302	584.491	0.151976	-0.00506624	596.832	0.260672	-0.0020644	602.943	0.260189	-0.00749815	594.013	0.245999	-0.0040198	607.807	0.253723	-0.00912127	571.067	0.191886	-0.00287324	603.434	0.223343	-0.00352352	582.612	0.179288	-0.00542223	577.637	0.106212	-0.00519759
580.646	0.216778	-0.00276411	584.012	0.181166	-0.00567969	584.779	0.150458	-0.00528425	597.143	0.259878	-0.0025558	603.246	0.257804	-0.00786973	594.317	0.244646	-0.00445707	608.105	0.250897	-0.00948474	571.359	0.19095	-0.00320354	603.743	0.22213	-0.00392774	582.9	0.177647	-0.00569039	577.911	0.10476	-0.00530529
580.946	0.215833	-0.00315147	584.301	0.179445	-0.0059481	585.066	0.148879	-0.00549475	597.453	0.258933	-0.00304275	603.549	0.255309	-0.00823149	594.62	0.243163	-0.00488693	608.403	0.247966	-0.00983391	571.652	0.189918	-0.00352896	604.052	0.220794	-0.0043253	583.189	0.17593	-0.00595036	578.184	0.103281	-0.00540668
581.246	0.214774	-0.00353375	584.591	0.177648	-0.00620789	585.353	0.147241	-0.00569751	597.764	0.257839	-0.00352439	603.852	0.252707	-0.00858286	594.924	0.241552	-0.00530871	608.701	0.244936	-0.0101684	571.944	0.188793	-0.003849	604.361	0.219337	-0.00471553	583.477	0.174142	-0.0062018	578.458	0.101776	-0.00550171
581.545	0.213601	-0.00391032	584.88	0.175779	-0.00645876	585.641	0.145548	-0.00589231	598.075	0.256597	-0.00399989	604.155	0.250002	-0.0089233	595.227	0.239815	-0.00572172	608.999	0.241811	-0.0104877	572.236	0.187576	-0.00416318	604.669	0.217763	-0.00509777	583.765	0.172283	-0.00644441	578.731	0.100246	-0.00559033
581.845	0.212317	-0.00428059	585.17	0.173839	-0.00670041	585.928	0.143801	-0.00607893	598.385	0.255209	-0.00446843	604.458	0.247198	-0.00925231	595.531	0.237956	-0.00612533	609.297	0.238595	-0.0107917	572.528	0.186269	-0.00447104	604.978	0.216073	-0.00547141	584.054	0.170357	-0.00667791	579.005	0.0986945	-0.00567252
582.145	0.210925	-0.00464397	585.459	0.171833	-0.00693255	586.215	0.142003	-0.00625718	598.696	0.253679	-0.00492919	604.761	0.244297	-0.0095694	595.834	0.235978	-0.00651892	609.595	0.235293	-0.0110799	572.821	0.184874	-0.00477215	605.287	0.21427	-0.00583585	584.342	0.168367	-0.00690204	579.279	0.0971218	-0.00574826
582.445	0.209426	-0.0049999	585.749	0.169762	-0.00715494	586.503	0.140156	-0.00642691	599.006	0.252008	-0.00538141	605.065	0.241304	-0.00987413	596.138	0.233883	-0.00690191	609.893	0.231911	-0.0113521	573.113	0.183394	-0.00506605	605.596	0.212358	-0.00619051	584.631	0.166315	-0.00711657	579.552	0.0955302	-0.00581755
582.745	0.207822	-0.00534784	586.038	0.16763	-0.00736735	586.79	0.138263	-0.00658795	599.317	0.250199	-0.00582432	605.368	0.238223	-0.0101661	596.441	0.231676	-0.00727372	610.191	0.228451	-0.0116081	573.405	0.181829	-0.00535236	605.905	0.210339	-0.00653485	584.919	0.164203	-0.00732127	579.826	0.0939214	-0.00588039
583.045	0.206117	-0.00568727	586.327	0.165439	-0.00756957	587.077	0.136326	-0.00674018	599.627	0.248256	-0.00625721	605.671	0.235057	-0.0104448	596.745	0.229359	-0.00763384	610.489	0.224921	-0.0118477	573.698	0.180183	-0.00563067	606.214	0.208217	-0.00686836	585.207	0.162035	-0.00751595	580.099	0.0922971	-0.00593682
583.345	0.204312	-0.00601768	586.617	0.163192	-0.00776142	587.365	0.134348	-0.00688349	599.938	0.246182	-0.00667938	605.974	0.23181	-0.0107101	597.048	0.226936	-0.00798176	610.787	0.221324	-0.0120708	573.99	0.178459	-0.00590061	606.523	0.205996	-0.00719054	585.496	0.159815	-0.00770044	580.373	0.0906592	-0.00598685
583.644	0.202412	-0.00633862	586.906	0.160893	-0.00794273	587.652	0.132331	-0.00701778	600.248	0.24398	-0.00709015	606.277	0.228488	-0.0109615	597.352	0.224412	-0.00831702	611.085	0.217665	-0.0122773	574.282	0.176658	-0.00616184	606.832	0.203679	-0.00750094	585.784	0.157544	-0.00787461	580.647	0.0890093	-0.00603054
583.944	0.200418	-0.00664962	587.196	0.158545	-0.00811338	587.94	0.130279	-0.00714298	600.559	0.241655	-0.0074889	606.58	0.225093	-0.0111988	597.655	0.22179	-0.00863919	611.383	0.21395	-0.0124671	574.575	0.174783	-0.00641403	607.141	0.20127	-0.00779915	586.073	0.155225	-0.00803831	580.92	0.0873491	-0.00606793
584.244	0.198334	-0.00695027	587.485	0.156151	-0.00827325	588.227	0.128193	-0.00725905	600.869	0.239209	-0.00787503	606.883	0.221631	-0.0114217	597.959	0.219075	-0.00894786	611.681	0.210184	-0.0126401	574.867	0.172837	-0.00665686	607.45	0.198773	-0.00808479	586.361	0.152863	-0.00819146	581.194	0.0856805	-0.00609909
584.544	0.196163	-0.00724016	587.775	0.153713	-0.00842226	588.514	0.126076	-0.00736595	601.18	0.236648	-0.00824798	607.186	0.218106	-0.01163	598.262	0.216269	-0.00924269	611.979	0.20637	-0.0127964	575.159	0.170823	-0.00689007	607.758	0.196191	-0.00835748	586.649	0.15046	-0.00833397	581.467	0.084005	-0.0061241
584.844	0.193908	-0.00751895	588.064	0.151235	-0.00856034	588.802	0.123931	-0.00746367	601.49	0.233975	-0.00860721	607.489	0.214522	-0.0118236	598.566	0.213379	-0.00952333	612.277	0.202516	-0.012936	575.451	0.168744	-0.00711339	608.067	0.19353	-0.00861693	586.938	0.148018	-0.0084658	581.741	0.0823243	-0.00614303
585.144	0.191573	-0.00778628	588.353	0.148721	-0.00868745	589.089	0.121761	-0.00755221	601.801	0.231196	-0.00895225	607.793	0.210884	-0.0120023	598.869	0.210408	-0.0097895	612.575	0.198624	-0.013059	575.744	0.166602	-0.00732658	608.376	0.190792	-0.00886284	587.226	0.145542	-0.0085869	582.014	0.0806401	-0.00615599
585.444	0.189162	-0.00804184	588.643	0.146173	-0.00880358	589.376	0.119568	-0.00763159	602.111	0.228313	-0.00928264	608.096	0.207197	-0.0121659	599.173	0.207361	-0.0100409	612.873	0.194701	-0.0131655	576.036	0.164401	-0.00752944	608.685	0.187983	-0.00909497	587.515	0.143033	-0.00869727	582.288	0.078954	-0.00616307
585.743	0.186677	-0.00828536	588.932	0.143594	-0.00890872	589.664	0.117355	-0.00770186	602.422	0.225333	-0.00959797	608.399	0.203464	-0.0123145	599.476	0.204241	-0.0102774	613.171	0.190751	-0.0132556	576.328	0.162144	-0.00772177	608.994	0.185106	-0.00931311	587.803	0.140496	-0.00879692	582.562	0.0772674	-0.00616439
586.043	0.184123	-0.00851659	589.222	0.140989	-0.00900292	589.951	0.115124	-0.00776308	602.732	0.222259	-0.00989788	608.702	0.199691	-0.012448	599.78	0.201055	-0.0104988	613.469	0.186779	-0.0133296	576.621	0.159834	-0.00790342	609.303	0.182166	-0.00951708	588.091	0.137934	-0.00888589	582.835	0.0755821	-0.00616006
586.343	0.181504	-0.00873532	589.511	0.138359	-0.00908621	590.239	0.112878	-0.00781532	603.043	0.219098	-0.010182	609.005	0.195882	-0.0125663	600.083	0.197806	-0.0107049	613.767	0.182789	-0.0133876	576.913	0.157474	-0.00807425	609.612	0.179168	-0.00970675	588.38	0.135348	-0.00896423	583.109	0.0738995	-0.00615022
586.643	0.178823	-0.00894134	589.801	0.135708	-0.00915867	590.526	0.11062	-0.00785868	603.353	0.215853	-0.0104502	609.308	0.192041	-0.0126696	600.387	0.194499	-0.0108957	614.065	0.178787	-0.0134299	577.205	0.155067	-0.00823414	609.921	0.176115	-0.00988201	588.668	0.132744	-0.00903202	583.382	0.072221	-0.00613499
586.943	0.176084	-0.0091345	590.09	0.133039	-0.0092204	590.813	0.108351	-0.00789326	603.664	0.212529	-0.010702	609.611	0.188174	-0.0127578	600.69	0.191139	-0.011071	614.363	0.174777	-0.0134568	577.498	0.152617	-0.00838302	610.23	0.173013	-0.0100428	588.957	0.130122	-0.00908935	583.656	0.0705481	-0.00611453
587.243	0.173291	-0.00931469	590.38	0.130356	-0.0092715	591.101	0.106076	-0.0079192	603.974	0.209133	-0.0109374	609.914	0.184285	-0.0128311	600.994	0.187731	-0.0112308	614.661	0.170764	-0.0134685	577.79	0.150127	-0.0085208	610.538	0.169866	-0.0101891	589.245	0.127487	-0.00913634	583.93	0.0688822	-0.00608897
587.543	0.170448	-0.00948179	590.669	0.127661	-0.00931211	591.388	0.103795	-0.00793662	604.285	0.205669	-0.0111561	610.217	0.180378	-0.0128897	601.297	0.184279	-0.0113752	614.959	0.166751	-0.0134654	578.082	0.147599	-0.00864746	610.847	0.166678	-0.0103209	589.533	0.124842	-0.00917312	584.203	0.0672247	-0.00605847
587.842	0.167558	-0.00963576	590.958	0.124957	-0.00934238	591.675	0.101512	-0.0079457	604.595	0.202142	-0.0113581	610.521	0.176458	-0.0129336	601.601	0.180787	-0.0115041	615.257	0.162744	-0.0134478	578.374	0.145038	-0.00876298	611.156	0.163453	-0.0104382	589.822	0.122189	-0.00919985	584.477	0.0655768	-0.00602319
588.142	0.164627	-0.00977654	591.248	0.122247	-0.00936248	591.963	0.0992282	-0.00794658	604.906	0.198557	-0.0115432	610.824	0.172528	-0.0129631	601.904	0.177261	-0.0116177	615.555	0.158746	-0.0134161	578.667	0.142446	-0.00886737	611.465	0.160197	-0.0105411	590.11	0.11953	-0.00921669	584.75	0.0639399	-0.0059833
588.442	0.161657	-0.00990414	591.537	0.119534	-0.0093726	592.25	0.0969466	-0.00793945	605.217	0.194921	-0.0117115	611.127	0.168595	-0.0129784	602.208	0.173705	-0.011716	615.853	0.154762	-0.0133707	578.959	0.139827	-0.00896066	611.774	0.156914	-0.0106297	590.399	0.11687	-0.00922384	585.024	0.062315	-0.00593895
588.742	0.158653	-0.0100186	591.827	0.116821	-0.00937293	592.537	0.0946694	-0.00792451	605.527	0.191237	-0.0118629	611.43	0.16466	-0.0129797	602.511	0.170124	-0.0117991	616.151	0.150795	-0.013312	579.251	0.137183	-0.0090429	612.083	0.153607	-0.0107041	590.687	0.114211	-0.00922149	585.298	0.0607035	-0.00589034
589.042	0.155618	-0.0101199	592.116	0.114111	-0.0093637	592.825	0.0923987	-0.00790196	605.838	0.187512	-0.0119975	611.733	0.16073	-0.0129674	602.815	0.166523	-0.0118673	616.449	0.146849	-0.0132405	579.544	0.134519	-0.00911418	612.392	0.150282	-0.0107645	590.975	0.111555	-0.00920985	585.571	0.0591064	-0.00583762
589.342	0.152557	-0.0102082	592.406	0.111407	-0.00934514	593.112	0.0901365	-0.00787202	606.148	0.18375	-0.0121154	612.036	0.156807	-0.0129416	603.118	0.162905	-0.0119208	616.747	0.142929	-0.0131565	579.836	0.131838	-0.00917458	612.701	0.146943	-0.0108112	591.264	0.108905	-0.00918917	585.845	0.0575247	-0.00578098
589.642	0.149474	-0.0102836	592.695	0.10871	-0.00931749	593.4	0.0878851	-0.0078349	606.459	0.179956	-0.0122167	612.339	0.152896	-0.0129029	603.422	0.159275	-0.0119597	617.045	0.139037	-0.0130606	580.128	0.129141	-0.00922422	613.01	0.143593	-0.0108442	591.552	0.106263	-0.00915969	586.118	0.0559596	-0.0057206
589.941	0.146371	-0.0103461	592.984	0.106024	-0.00928102	593.687	0.0856462	-0.00779084	606.769	0.176136	-0.0123015	612.642	0.149001	-0.0128514	603.725	0.155638	-0.0119843	617.343	0.135177	-0.0129531	580.42	0.126434	-0.00926326	613.319	0.140237	-0.0108639	591.841	0.103632	-0.00912165	586.392	0.054412	-0.00565666
590.241	0.143254	-0.0103961	593.274	0.10335	-0.009236	593.974	0.083422	-0.00774008	607.08	0.172295	-0.0123701	612.945	0.145124	-0.0127876	604.029	0.151997	-0.0119949	617.641	0.131352	-0.0128347	580.713	0.123718	-0.00929183	613.627	0.136879	-0.0108705	592.129	0.101015	-0.00907533	586.665	0.0528828	-0.00558936
590.541	0.140125	-0.0104336	593.563	0.100693	-0.0091827	594.262	0.0812142	-0.00768287	607.39	0.168437	-0.0124227	613.249	0.141271	-0.0127118	604.332	0.148358	-0.0119918	617.939	0.127566	-0.0127059	581.005	0.120997	-0.00931012	613.936	0.133523	-0.0108644	592.417	0.0984134	-0.009021	586.939	0.0513729	-0.00551886
590.841	0.136989	-0.0104588	593.853	0.0980526	-0.00912143	594.549	0.0790247	-0.00761946	607.701	0.164568	-0.0124595	613.552	0.137445	-0.0126245	604.636	0.144723	-0.0119754	618.237	0.123821	-0.012567	581.297	0.118273	-0.00931833	614.245	0.130173	-0.0108457	592.706	0.0958297	-0.00895895	587.213	0.0498831	-0.00544536
591.141	0.133849	-0.0104721	594.142	0.0954325	-0.00905247	594.836	0.076855	-0.00755013	608.011	0.160693	-0.0124808	613.855	0.133648	-0.012526	604.939	0.141098	-0.0119459	618.535	0.120121	-0.0124187	581.59	0.11555	-0.00931667	614.554	0.126833	-0.010815	592.994	0.093266	-0.00888948	587.486	0.0484142	-0.00536905
591.441	0.130708	-0.0104735	594.432	0.0928346	-0.00897615	595.124	0.0747069	-0.00747512	608.322	0.156815	-0.0124869	614.158	0.129884	-0.0124169	605.243	0.137485	-0.0119038	618.833	0.116467	-0.0122614	581.882	0.11283	-0.00930535	614.863	0.123505	-0.0107725	593.283	0.0907244	-0.00881288	587.76	0.0469669	-0.00529011
591.741	0.127571	-0.0104635	594.721	0.0902607	-0.00889276	595.411	0.0725819	-0.00739471	608.632	0.152941	-0.0124783	614.461	0.126157	-0.0122975	605.546	0.133889	-0.0118494	619.131	0.112862	-0.0120957	582.174	0.110116	-0.00928463	615.172	0.120194	-0.0107187	593.571	0.0882068	-0.00872947	588.033	0.0455418	-0.00520873
592.041	0.12444	-0.0104423	595.01	0.087713	-0.00880265	595.698	0.0704815	-0.00730918	608.943	0.149073	-0.0124553	614.764	0.122468	-0.0121683	605.85	0.130313	-0.0117832	619.429	0.10931	-0.0119221	582.467	0.107411	-0.00925476	615.481	0.116903	-0.0106539	593.859	0.0857152	-0.00863955	588.307	0.0441397	-0.00512509
592.34	0.121318	-0.0104101	595.3	0.0851931	-0.00870612	595.986	0.0684071	-0.00721879	609.253	0.145217	-0.0124182	615.067	0.118822	-0.0120299	606.153	0.12676	-0.0117056	619.727	0.105811	-0.0117411	582.759	0.104717	-0.009216	615.79	0.113635	-0.0105785	594.148	0.0832513	-0.00854345	588.581	0.042761	-0.00503937
592.64	0.118209	-0.0103674	595.589	0.082703	-0.00860351	596.273	0.06636	-0.00712384	609.564	0.141377	-0.0123675	615.37	0.11522	-0.0118826	606.457	0.123234	-0.0116169	620.025	0.102368	-0.0115533	583.051	0.102037	-0.00916865	616.099	0.110394	-0.0104929	594.436	0.0808167	-0.00844149	588.854	0.0414062	-0.00495176
592.94	0.115116	-0.0103145	595.879	0.0802443	-0.00849516	596.561	0.0643414	-0.00702458	609.874	0.137556	-0.0123037	615.673	0.111666	-0.0117269	606.76	0.119739	-0.0115178	620.323	0.0989832	-0.0113592	583.343	0.0993733	-0.00911298	616.407	0.107183	-0.0103976	594.725	0.0784132	-0.00833398	589.128	0.0400759	-0.00486243
593.24	0.112042	-0.0102517	596.168	0.0778184	-0.00838139	596.848	0.0623524	-0.00692131	610.185	0.133759	-0.0122272	615.977	0.108161	-0.0115634	607.064	0.116276	-0.0114086	620.621	0.0956579	-0.0111592	583.636	0.0967283	-0.0090493	616.716	0.104003	-0.0102931	595.013	0.0760422	-0.00822127	589.401	0.0387704	-0.00477156
593.54	0.10899	-0.0101793	596.458	0.075427	-0.00826254	597.135	0.0603942	-0.0068143	610.495	0.12999	-0.0121384	616.28	0.104707	-0.0113925	607.367	0.11285	-0.0112897	620.919	0.0923937	-0.010954	583.928	0.0941041	-0.00897792	617.025	0.100859	-0.0101798	595.301	0.0737052	-0.00810367	589.675	0.0374902	-0.00467933
593.84	0.105962	-0.0100978	596.747	0.0730713	-0.00813895	597.423	0.0584678	-0.00670383	610.806	0.126252	-0.012038	616.583	0.101308	-0.0112148	607.671	0.109462	-0.0111618	621.217	0.089192	-0.010744	584.22	0.0915029	-0.00889917	617.334	0.0977517	-0.0100581	595.59	0.0714033	-0.0079815	589.949	0.0362356	-0.0045859
594.14	0.102961	-0.0100075	597.036	0.0707527	-0.00801096	597.71	0.056574	-0.00659018	611.116	0.122549	-0.0119263	616.886	0.0979646	-0.0110306	607.974	0.106116	-0.0110252	621.515	0.0860543	-0.0105297	584.513	0.0889268	-0.00881335	617.643	0.0946848	-0.00992846	595.878	0.0691379	-0.00785511	590.222	0.0350067	-0.00449144
594.439	0.0999899	-0.00990887	597.326	0.0684723	-0.00787889	597.997	0.0547137	-0.00647361	611.427	0.118883	-0.011804	617.189	0.0946786	-0.0108406	608.278	0.102814	-0.0108805	621.813	0.0829815	-0.0103117	584.805	0.0863777	-0.00872081	617.952	0.0916603	-0.00979145	596.167	0.0669101	-0.0077248	590.496	0.033804	-0.00439611
594.739	0.0970506	-0.00980227	597.615	0.0662312	-0.00774308	598.285	0.0528877	-0.0063544	611.737	0.115259	-0.0116715	617.492	0.0914519	-0.0106452	608.581	0.099558	-0.0107281	622.111	0.0799746	-0.0100904	585.097	0.0838576	-0.00862187	618.261	0.0886803	-0.00964749	596.455	0.0647209	-0.00759091	590.769	0.0326276	-0.00430007
595.039	0.0941456	-0.00968809	597.905	0.0640305	-0.00760386	598.572	0.0510966	-0.00623281	612.048	0.111679	-0.0115294	617.795	0.088286	-0.0104449	608.885	0.0963505	-0.0105686	622.409	0.0770346	-0.0098662	585.389	0.0813682	-0.00851688	618.57	0.0857467	-0.00949706	596.743	0.0625713	-0.00745375	591.043	0.0314775	-0.00420348
595.339	0.0912769	-0.00956677	598.194	0.0618709	-0.00746154	598.859	0.049341	-0.0061091	612.359	0.108146	-0.0113783	618.098	0.085182	-0.0102402	609.188	0.0931934	-0.0104024	622.707	0.074162	-0.0096397	585.682	0.0789111	-0.00840618	618.879	0.0828614	-0.00934063	597.032	0.060462	-0.00731364	591.317	0.030354	-0.00410649
595.639	0.0884466	-0.00943871	598.484	0.0597532	-0.00731646	599.147	0.0476216	-0.00598354	612.669	0.104662	-0.0112186	618.401	0.0821414	-0.0100315	609.492	0.0900886	-0.0102301	623.005	0.0713576	-0.00941129	585.974	0.0764879	-0.00829011	619.188	0.0800262	-0.00917867	597.32	0.058394	-0.00717088	591.59	0.0292571	-0.00400924
595.939	0.0856566	-0.00930432	598.773	0.0576783	-0.00716892	599.434	0.0459387	-0.00585638	612.98	0.10123	-0.0110509	618.705	0.079165	-0.00981934	609.795	0.0870378	-0.010052	623.303	0.0686216	-0.00918141	586.266	0.0741002	-0.00816902	619.496	0.0772425	-0.00901165	597.609	0.0563677	-0.00702578	591.864	0.0281869	-0.00391188
596.239	0.0829087	-0.00916404	599.062	0.0556468	-0.00701924	599.722	0.0442927	-0.00572785	613.29	0.0978532	-0.0108759	619.008	0.0762539	-0.00960418	610.099	0.0840427	-0.00986884	623.601	0.0659544	-0.00895051	586.559	0.0717492	-0.00804324	619.805	0.0745119	-0.00884003	597.897	0.054384	-0.00687865	592.137	0.0271433	-0.00381454
596.538	0.0802045	-0.00901826	599.352	0.053659	-0.00686771	600.009	0.0426839	-0.00559821	613.601	0.0945324	-0.010694	619.311	0.0734087	-0.00938647	610.402	0.0811045	-0.00968093	623.899	0.0633562	-0.00871897	586.851	0.0694362	-0.00791312	620.114	0.0718355	-0.00866427	598.185	0.0524431	-0.00672977	592.411	0.0261262	-0.00371735
596.838	0.0775455	-0.00886742	599.641	0.0517156	-0.00671463	600.296	0.0411127	-0.00546769	613.911	0.0912702	-0.0105057	619.614	0.0706302	-0.00916665	610.706	0.0782247	-0.0094888	624.197	0.0608271	-0.00848721	587.143	0.0671624	-0.00777901	620.423	0.0692146	-0.00848483	598.474	0.0505456	-0.00657943	592.684	0.0251357	-0.00362044
597.138	0.0749332	-0.00871192	599.931	0.0498169	-0.0065603	600.584	0.0395792	-0.00533651	614.222	0.0880682	-0.0103117	619.917	0.0679188	-0.00894514	611.009	0.0754043	-0.00929292	624.495	0.058367	-0.0082556	587.436	0.0649289	-0.00764123	620.732	0.0666502	-0.00830214	598.762	0.0486918	-0.00642791	592.958	0.0241716	-0.00352393
597.438	0.0723688	-0.00855217	600.22	0.0479631	-0.00640499	600.871	0.0380835	-0.0052049	614.532	0.084928	-0.0101125	620.22	0.065275	-0.00872237	611.313	0.0726444	-0.00909374	624.793	0.0559758	-0.00802451	587.728	0.0627367	-0.00750013	621.041	0.064143	-0.00811664	599.051	0.046882	-0.00627549	593.232	0.0232338	-0.00342793
597.738	0.0698534	-0.00838857	600.51	0.0461544	-0.00624897	601.158	0.0366257	-0.00507306	614.843	0.0818512	-0.00990856	620.523	0.0626989	-0.00849874	611.616	0.0699458	-0.00889173	625.091	0.0536531	-0.00779428	588.02	0.0605866	-0.00735603	621.35	0.0616938	-0.00792876	599.339	0.0451163	-0.00612241	593.505	0.022322	-0.00333256
598.038	0.0673881	-0.00822154	600.799	0.0443911	-0.0060925	601.446	0.0352057	-0.00494121	615.153	0.078839	-0.00970047	620.826	0.0601907	-0.00827466	611.92	0.0673092	-0.00868731	625.389	0.0513988	-0.00756527	588.312	0.0584793	-0.00720926	621.659	0.0593033	-0.00773892	599.627	0.0433948	-0.00596895	593.779	0.0214362	-0.00323792
598.338	0.0649738	-0.00805145	601.088	0.042673	-0.00593585	601.733	0.0338236	-0.00480955	615.464	0.0758926	-0.00948872	621.129	0.0577505	-0.00805049	612.223	0.0647353	-0.00848093	625.687	0.0492122	-0.00733777	588.605	0.0564157	-0.00706014	621.968	0.0569719	-0.00754751	599.916	0.0417177	-0.00581535	594.052	0.020576	-0.00314411
598.637	0.0626113	-0.0078787	601.378	0.0410003	-0.00577925	602.02	0.0324793	-0.00467826	615.774	0.0730128	-0.00927383	621.433	0.0553782	-0.00782661	612.527	0.0622244	-0.00827301	625.985	0.0470928	-0.00711209	588.897	0.0543962	-0.00690898	622.276	0.0547	-0.00735492	600.204	0.0400849	-0.00566184	594.326	0.0197412	-0.00305122
598.937	0.0603013	-0.00770366	601.667	0.0393729	-0.00562295	602.308	0.0311725	-0.00454752	616.085	0.0702007	-0.00905629	621.736	0.0530735	-0.00760336	612.83	0.0597771	-0.00806394	626.283	0.0450401	-0.00688852	589.189	0.0524215	-0.0067561	622.585	0.0524879	-0.00716155	600.493	0.0384962	-0.00550865	594.6	0.0189315	-0.00295935
599.237	0.0580443	-0.0075267	601.957	0.0377905	-0.00546716	602.595	0.029903	-0.0044175	616.395	0.0674567	-0.00883657	622.039	0.0508362	-0.00738109	613.134	0.0573934	-0.00785412	626.581	0.0430533	-0.00666733	589.482	0.0504918	-0.00660178	622.894	0.0503356	-0.00696775	600.781	0.0369515	-0.005356	594.873	0.0181467	-0.00286857
599.537	0.0558409	-0.00734819	602.246	0.036253	-0.0053121	602.883	0.0286707	-0.00428838	616.706	0.0647815	-0.00861515	622.342	0.0486659	-0.00716011	613.437	0.0550734	-0.00764394	626.879	0.0411316	-0.00644876	589.774	0.0486076	-0.00644632	623.203	0.0482432	-0.00677387	601.069	0.0354507	-0.0052041	595.147	0.0173864	-0.00277896
599.837	0.0536914	-0.00716847	602.536	0.0347602	-0.00515798	603.17	0.0274752	-0.00416031	617.016	0.0621755	-0.00839248	622.645	0.0465621	-0.00694072	613.741	0.0528173	-0.00743376	627.177	0.0392742	-0.00623305	590.066	0.046769	-0.00629001	623.512	0.0462106	-0.00658026	601.358	0.0339933	-0.00505314	595.42	0.0166503	-0.0026906
600.137	0.051596	-0.00698787	602.825	0.0333116	-0.005005	603.457	0.0263161	-0.00403344	617.327	0.0596388	-0.008169	622.948	0.0445242	-0.00672322	614.044	0.0506249	-0.00722392	627.475	0.0374802	-0.00602041	590.358	0.0449763	-0.00613311	623.821	0.0442376	-0.00638723	601.646	0.0325792	-0.00490332	595.694	0.015938	-0.00260356
600.437	0.049555	-0.00680674	603.114	0.0319069	-0.00485333	603.745	0.0251931	-0.0039079	617.637	0.0571717	-0.00794514	623.251	0.0425516	-0.00650787	614.348	0.0484959	-0.00701477	627.773	0.0357486	-0.00581105	590.651	0.0432296	-0.0059759	624.13	0.042324	-0.0061951	601.935	0.031208	-0.00475481	595.968	0.0152491	-0.00251788
600.736	0.0475683	-0.00662538	603.404	0.0305456	-0.00470316	604.032	0.0241058	-0.00378383	617.948	0.0547741	-0.00772129	623.554	0.0406435	-0.00629494	614.651	0.0464301	-0.00680661	628.071	0.0340783	-0.00560516	590.943	0.0415289	-0.00581862	624.439	0.0404693	-0.00600415	602.223	0.0298791	-0.00460778	596.241	0.0145833	-0.00243364
601.036	0.045636	-0.00644411	603.693	0.0292274	-0.00455464	604.319	0.0230536	-0.00366134	618.258	0.0524458	-0.00749785	623.858	0.0387992	-0.00608466	614.955	0.0444271	-0.00659977	628.369	0.0324682	-0.0054029	591.235	0.039874	-0.00566153	624.748	0.0386732	-0.00581467	602.511	0.0285921	-0.00446239	596.515	0.0139401	-0.00235089
601.336	0.0437579	-0.0062632	603.983	0.0279516	-0.00440793	604.607	0.0220362	-0.00354056	618.569	0.0501867	-0.00727519	624.161	0.0370177	-0.00587725	615.258	0.0424864	-0.00639452	628.667	0.0309174	-0.00520442	591.528	0.038265	-0.00550486	625.057	0.0369351	-0.00562692	602.8	0.0273466	-0.0043188	596.788	0.0133192	-0.00226966
601.636	0.0419339	-0.00608294	604.272	0.0267177	-0.00426318	604.894	0.021053	-0.00342159	618.879	0.0479964	-0.00705366	624.464	0.0352982	-0.00567292	615.562	0.0406074	-0.00619115	628.965	0.0294245	-0.00500986	591.82	0.0367016	-0.00534883	625.365	0.0352543	-0.00544114	603.088	0.0261419	-0.00417712	597.062	0.01272	-0.00219
601.936	0.0401636	-0.0059036	604.562	0.0255251	-0.00412052	605.181	0.0201034	-0.00330452	619.19	0.0458744	-0.00683361	624.767	0.0336396	-0.00547187	615.865	0.0387895	-0.00598989	629.263	0.0279884	-0.00481935	592.112	0.0351835	-0.00519367	625.674	0.0336303	-0.00525756	603.377	0.0249775	-0.00403751	597.336	0.0121422	-0.00211196
602.236	0.0384468	-0.00572543	604.851	0.0243731	-0.00398006	605.469	0.0191868	-0.00318945	619.5	0.0438202	-0.00661535	625.07	0.0320409	-0.00527427	616.169	0.0370319	-0.005791	629.561	0.0266078	-0.004633	592.405	0.0337104	-0.00503957	625.983	0.0320622	-0.0050764	603.665	0.0238528	-0.00390006	597.609	0.0115853	-0.00203555
602.536	0.036783	-0.00554867	605.14	0.0232612	-0.00384193	605.756	0.0183028	-0.00307645	619.811	0.0418331	-0.00639918	625.373	0.030501	-0.00508028	616.472	0.035334	-0.0055947	629.859	0.0252814	-0.0044509	592.697	0.0322821	-0.00488673	626.292	0.0305493	-0.00489786	603.953	0.022767	-0.0037649	597.883	0.0110488	-0.00196082
602.835	0.0351717	-0.00537354	605.43	0.0221885	-0.00370623	606.044	0.0174505	-0.0029656	620.122	0.0399124	-0.00618539	625.676	0.0290188	-0.00489004	616.776	0.0336947	-0.0054012	630.157	0.0240081	-0.00427312	592.989	0.030898	-0.00473533	626.601	0.0290907	-0.00472213	604.242	0.0217195	-0.00363212	598.156	0.0105323	-0.00188778
603.135	0.0336123	-0.00520027	605.719	0.0211543	-0.00357305	606.331	0.0166296	-0.00285697	620.432	0.0380573	-0.00597423	625.979	0.027593	-0.00470369	617.079	0.0321133	-0.00521069	630.455	0.0227864	-0.00409974	593.281	0.0295576	-0.00458554	626.91	0.0276854	-0.00454937	604.53	0.0207096	-0.00350182	598.43	0.0100354	-0.00181645
603.435	0.0321043	-0.00502904	606.009	0.0201579	-0.00344247	606.618	0.0158391	-0.00275061	620.743	0.0362669	-0.00576596	626.282	0.0262226	-0.00452133	617.383	0.0305887	-0.00502335	630.753	0.021615	-0.00393082	593.574	0.0282606	-0.00443753	627.219	0.0263325	-0.00437973	604.819	0.0197365	-0.00337407	598.703	0.00955746	-0.00174686
603.735	0.030647	-0.00486005	606.298	0.0191986	-0.00331458	606.906	0.0150786	-0.00264657	621.053	0.0345401	-0.00556079	626.586	0.0249061	-0.00434308	617.686	0.02912	-0.00483933	631.051	0.0204927	-0.00376639	593.866	0.0270062	-0.00429145	627.528	0.025031	-0.00421337	605.107	0.0187995	-0.00324895	598.977	0.0090981	-0.00167901
604.035	0.0292396	-0.00469347	606.588	0.0182755	-0.00318943	607.193	0.0143473	-0.0025449	621.364	0.0328761	-0.00535895	626.889	0.0236424	-0.00416901	617.99	0.0277061	-0.00465879	631.349	0.019418	-0.00360648	594.158	0.0257939	-0.00414743	627.837	0.0237799	-0.00405039	605.395	0.0178978	-0.00312651	599.251	0.00865683	-0.0016129
604.335	0.0278814	-0.00452946	606.877	0.0173878	-0.00306709	607.48	0.0136445	-0.00244564	621.674	0.0312736	-0.00516062	627.192	0.0224302	-0.0039992	618.293	0.0263458	-0.00448186	631.647	0.0183896	-0.00345112	594.451	0.0246231	-0.00400561	628.145	0.022578	-0.00389092	605.684	0.0170306	-0.00300683	599.524	0.00823316	-0.00154856
604.635	0.0265716	-0.00436817	607.166	0.0165346	-0.0029476	607.768	0.0129695	-0.00234881	621.985	0.0297315	-0.00496597	627.495	0.0212682	-0.00383372	618.597	0.0250382	-0.00430866	631.945	0.0174061	-0.00330031	594.743	0.023493	-0.00386611	628.454	0.0214243	-0.00373505	605.972	0.0161972	-0.00288993	599.798	0.00782661	-0.00148596
604.934	0.0253093	-0.00420973	607.456	0.0157153	-0.00283101	608.055	0.0123217	-0.00225444	622.295	0.0282487	-0.00477517	627.798	0.020155	-0.0036726	618.9	0.0237819	-0.00413928	632.243	0.0164662	-0.00315405	595.035	0.0224031	-0.00372904	628.763	0.0203175	-0.00358287	606.261	0.0153966	-0.00277587	600.071	0.00743671	-0.00142513
605.234	0.0240936	-0.00405427	607.745	0.0149288	-0.00271735	608.342	0.0117002	-0.00216255	622.606	0.026824	-0.00458836	628.101	0.0190893	-0.00351589	619.204	0.0225759	-0.00397383	632.541	0.0155686	-0.00301233	595.327	0.0213524	-0.00359449	629.072	0.0192567	-0.00343445	606.549	0.0146282	-0.00266467	600.345	0.00706298	-0.00136604
605.534	0.0229235	-0.00390189	608.035	0.0141743	-0.00260664	608.63	0.0111045	-0.00207315	622.916	0.0254559	-0.00440565	628.404	0.0180697	-0.00336362	619.507	0.0214188	-0.00381237	632.839	0.0147118	-0.00287514	595.62	0.0203403	-0.00346256	629.381	0.0182404	-0.00328984	606.837	0.0138909	-0.00255636	600.619	0.00670493	-0.00130869
605.834	0.0217983	-0.00375269	608.324	0.0134511	-0.0024989	608.917	0.0105337	-0.00198624	623.227	0.0241433	-0.00422716	628.707	0.017095	-0.00321579	619.811	0.0203095	-0.00365497	633.137	0.0138946	-0.00274243	595.912	0.019366	-0.00333332	629.69	0.0172677	-0.0031491	607.126	0.0131841	-0.00245095	600.892	0.0063621	-0.00125308
606.134	0.0207167	-0.00360676	608.614	0.0127581	-0.00239415	609.205	0.00998719	-0.00190183	623.537	0.0228847	-0.00405299	629.01	0.0161637	-0.00307241	620.114	0.0192468	-0.00350168	633.435	0.0131156	-0.00261418	596.204	0.0184287	-0.00320685	629.999	0.0163372	-0.00301227	607.414	0.0125068	-0.00234846	601.166	0.00603402	-0.00119918
606.434	0.019678	-0.00346418	608.903	0.0120947	-0.00229239	609.492	0.00946421	-0.00181992	623.848	0.0216789	-0.0038832	629.314	0.0152745	-0.00293347	620.418	0.0182293	-0.00335254	633.733	0.0123735	-0.00249034	596.497	0.0175275	-0.00308321	630.308	0.0154478	-0.00287936	607.703	0.0118582	-0.00224889	601.439	0.00572021	-0.00114698
606.734	0.018681	-0.003325	609.193	0.0114598	-0.00219361	609.779	0.00896405	-0.0017405	624.158	0.0205245	-0.00371787	629.617	0.0144261	-0.00279897	620.721	0.0172558	-0.00320758	634.031	0.011667	-0.00237086	596.789	0.0166615	-0.00296245	630.617	0.0145982	-0.0027504	607.991	0.0112375	-0.00215224	601.713	0.00542023	-0.00109647
607.033	0.0177246	-0.00318929	609.482	0.0108526	-0.00209782	610.067	0.008486	-0.00166354	624.469	0.0194199	-0.00355705	629.92	0.0136172	-0.00266886	621.025	0.016325	-0.00306683	634.329	0.0109948	-0.00225568	597.081	0.0158301	-0.00284461	630.926	0.0137873	-0.00262538	608.279	0.0106438	-0.0020585	601.987	0.00513361	-0.00104763
607.333	0.0168079	-0.00305708	609.771	0.0102723	-0.00200499	610.354	0.00802937	-0.00158905	624.779	0.0183639	-0.00340077	630.223	0.0128463	-0.00254313	621.328	0.0154357	-0.00293027	634.627	0.0103557	-0.00214474	597.374	0.0150322	-0.00272973	631.234	0.0130137	-0.00250431	608.568	0.0100764	-0.00196766	602.26	0.00485991	-0.00100042
607.633	0.0159298	-0.00292841	610.061	0.00971798	-0.00191512	610.641	0.00759344	-0.00151699	625.09	0.017355	-0.00324905	630.526	0.0121122	-0.00242173	621.632	0.0145865	-0.00279793	634.925	0.00974842	-0.00203797	597.666	0.014267	-0.00261784	631.543	0.0122763	-0.00238717	608.856	0.00953425	-0.00187971	602.534	0.00459867	-0.000954836
[truncated: 191 more rows]
