# Supplementary material for: How to tune the absorption spectrum of chlorophylls to enable better use of the available solar spectrum
Source: PeerJ journal article supplement (doi:10.7717/peerj-pchem.26), 2022-12-19
Supplement: Supporting_Info_wavelengths_and_energies.xls [file Supporting_Info_wavelengths_and_energies.xls]

## Sheet: All data
									TDDFT-result	TDDFT-result									Energy (Ha)	Energy (Ha)							Energy (kcal/mol)	Energy (kcal/mol)						Energy (kcal/mol)	Energy (kcal/mol)
# formyl	# vinyl		2	3	7	8	12		B-band	Q-band	B-band (eV)	Q-band (eV)	predicted actual B-band (eV)	predicted actual Q-band (eV)	predicted B-band (nm)	predicted Q-band (nm)	Gas phase redox potential Chl+/Chl (V)	Chl+/Chl vs. Chlide a 6-31G(d) gas phase	cation	neutral			solution redox potential Chl+/Chl* (V) in PSII (assuming potential of 1.1 V for the Chl+/Chl transition)	solution redox potential Chl+/Chl* (V) in PSII (assuming potential of 1.25 V for the Chl+/Chl transition)	solution redox potential Chl+/Chl (V) 6-311G(d,p)	Chl+/Chl vs. Chlide a 6-311G(d,p)	neutral 6-311G(d,p)	Cation 6-311G(d,p)				solution redox potential Chl+/Chl (V) 6-31G(d)	Chl+/Chl vs. Chlide a 6-31G(d)	neutral 6-31G(d)	cation 6-31G(d)
0	0	0						3-CH3	371.7	568.4	3.3355	2.18122	2.9173	1.92265	424.983	644.842	1.48051	-0.0335339	-1922.74	-1922.96			-0.822649	-0.672649	0.60459	-0.0385942	-1.20697e+06	-1.20686e+06		3-CH3		0.41292	-0.036426	-1.20669e+06	-1.20658e+06
0	1	1				Vinyl		8-CHCH2-3-CH3	388.2	570.9	3.19373	2.17167	2.83414	1.91185	437.454	648.485	1.52083	0.00678699	-1921.51	-1921.73			-0.772386	-0.622386	0.644051	0.000867285	-1.2062e+06	-1.20608e+06		3-CH3-8-CHCH2		0.448912	-0.000433643	-1.20591e+06	-1.2058e+06
0	1	1		Vinyl				3-CHCH2 (chlorophyll a)	378.5	578.5	3.27557	2.14314	2.88215	1.87958	430.166	659.616	1.51404	0	-1960.82	-1961.04			-0.74099	-0.59099	0.643184	0	-1.23087e+06	-1.23076e+06		Chl_a		0.449346	0	-1.23058e+06	-1.23047e+06
0	2	2		Vinyl	Vinyl			7-CHCH2	390	577.4	3.17898	2.14722	2.82549	1.8842	438.792	658	1.54501	0.0309714	-1998.9	-1999.12			-0.703544	-0.553544	0.685247	0.0420633	-1.25478e+06	-1.25466e+06		7-CHCH2		0.485772	0.036426	-1.25448e+06	-1.25437e+06
0	2	2		Vinyl		Vinyl		8-CHCH2	391.3	578.8	3.16842	2.14203	2.8193	1.87833	439.756	660.057	1.54743	0.0333878	-1959.58	-1959.8			-0.701139	-0.551139	0.681778	0.0385942	-1.2301e+06	-1.22998e+06		8-CHCH2		0.483604	0.0342578	-1.22981e+06	-1.2297e+06
0	3	3		Vinyl	Vinyl	Vinyl		8-CHCH2-7-CHCH2	402.5	580	3.08026	2.13759	2.76758	1.87332	447.974	661.823	1.57749	0.0634471	-1997.67	-1997.89			-0.662303	-0.512303	0.715602	0.0724183	-1.254e+06	-1.25389e+06		7-CHCH2-8-CHCH2		0.513959	0.0646127	-1.25371e+06	-1.25359e+06
0	2	2	Vinyl	Vinyl				2-CHCH2	386.1	591.3	3.2111	2.09674	2.84433	1.82712	435.886	678.557	1.53194	0.0179039	-1998.9	-1999.12			-0.66164	-0.51164	0.67007	0.0268858	-1.25478e+06	-1.25466e+06		2-CHCH2		0.471462	0.0221158	-1.25448e+06	-1.25437e+06
1	1	2		Vinyl		formyl		8-CHO-3-CH3	402.1	572.2	3.08332	2.16673	2.76938	1.90627	447.683	650.383	1.75975	0.245707	-1957.42	-1957.65			-0.657095	-0.507095	0.753763	0.110579	-1.22875e+06	-1.22863e+06		8-CHO-3-CH3		0.56296	0.113614	-1.22846e+06	-1.22834e+06
0	2	2		Vinyl			Vinyl	12-CHCH2	385.4	595.3	3.21693	2.08265	2.84775	1.81119	435.363	684.526	1.52981	0.0157731	-1998.9	-1999.12			-0.635733	-0.485733	0.680044	0.0368596	-1.25478e+06	-1.25466e+06		12-CHCH2		0.479701	0.030355	-1.25448e+06	-1.25437e+06
0	3	3	Vinyl	Vinyl	Vinyl			2-CHCH2-7-CHCH2	398.2	590.4	3.11352	2.09994	2.78709	1.83073	444.838	677.217	1.56215	0.0481088	-2036.98	-2037.2			-0.625359	-0.475359	0.709965	0.066781	-1.27868e+06	-1.27856e+06		2-CHCH2-7-CHCH2		0.506587	0.0572408	-1.27837e+06	-1.27826e+06
0	3	3	Vinyl	Vinyl		Vinyl		8-CHCH2-2-CHCH2	400.5	591.9	3.09564	2.09462	2.7766	1.82472	446.518	679.45	1.56969	0.0556502	-1997.66	-1997.88			-0.62281	-0.47281	0.706496	0.0633118	-1.254e+06	-1.25388e+06		2-CHCH2-8-CHCH2		0.504852	0.0555062	-1.25371e+06	-1.25359e+06
0	3	3		Vinyl	Vinyl		Vinyl	7-CHCH2-12-CHCH2	395.6	599.9	3.13398	2.06668	2.7991	1.79313	442.93	691.42	1.5354	0.021358	-2036.98	-2037.2			-0.602063	-0.452063	0.695655	0.0524707	-1.27868e+06	-1.27856e+06		7-CHCH2-12-CHCH2		0.488374	0.0390278	-1.27837e+06	-1.27826e+06
0	3	3		Vinyl		Vinyl	Vinyl	8-CHCH2-12-CHCH2	395.1	597.4	3.13795	2.07533	2.80142	1.80291	442.562	687.669	1.5657	0.0516652	-1997.67	-1997.89			-0.589727	-0.439727	0.717771	0.0745865	-1.254e+06	-1.25389e+06		12-CHCH2-8-CHCH2		0.514392	0.0650464	-1.25371e+06	-1.25359e+06
1	1	2		Vinyl	formyl			7-CHO (chlorophyll b)	415.4	569.7	2.9846	2.17624	2.71147	1.91702	457.245	646.735	1.7588	0.244759	-2034.82	-2035.05			-0.583287	-0.433287	0.838323	0.195139	-1.27733e+06	-1.27721e+06		7-CHO		0.64622	0.196874	-1.27703e+06	-1.27691e+06
1	1	2		Vinyl		formyl		8-CHO	409.2	579	3.02982	2.14129	2.73799	1.87749	452.815	660.352	1.81337	0.29933	-1995.5	-1995.73			-0.565873	-0.415873	0.816207	0.173023	-1.25265e+06	-1.25253e+06		8-CHO		0.625405	0.176059	-1.25236e+06	-1.25224e+06
0	3	3	Vinyl	Vinyl			Vinyl	2-CHCH2-12-CHCH2	395.3	612.7	3.13636	2.02351	2.80049	1.7443	442.71	710.774	1.52347	0.00943029	-2036.98	-2037.2			-0.562777	-0.412777	0.686115	0.0429306	-1.27868e+06	-1.27856e+06		2-CHCH2-12-CHCH2		0.479267	0.0299213	-1.27837e+06	-1.27826e+06
1	0	1		formyl				3-CHO (chlorophyll d)	398.9	600.7	3.10806	2.06393	2.78389	1.79002	445.35	692.622	1.69042	0.176377	-1996.74	-1996.96			-0.558188	-0.408188	0.736417	0.0932331	-1.25343e+06	-1.25331e+06		3-CHO		0.54865	0.0993041	-1.25313e+06	-1.25301e+06
1	2	3		Vinyl	formyl	Vinyl		8-CHCH2-7-CHO	425.6	575.2	2.91307	2.15543	2.66951	1.89349	464.432	654.773	1.77106	0.25702	-2033.58	-2033.81			-0.544578	-0.394578	0.853501	0.210317	-1.27656e+06	-1.27644e+06		7-CHO-8-CHCH2		0.657928	0.208582	-1.27625e+06	-1.27614e+06
1	1	2		formyl		Vinyl		3-CHO-8-CHCH2	409.7	600.6	3.02613	2.06428	2.73583	1.7904	453.174	692.472	1.72562	0.211583	-1995.5	-1995.73			-0.524752	-0.374752	0.770241	0.127057	-1.25265e+06	-1.25253e+06		3-CHO-8-CHCH2		0.600253	0.150908	-1.25236e+06	-1.25224e+06
1	2	3	Vinyl	Vinyl	formyl			7-CHO-2-CHCH2	423.3	580.7	2.9289	2.13502	2.67879	1.8704	462.822	662.854	1.77124	0.257203	-2072.9	-2073.13			-0.52019	-0.37019	0.854802	0.211618	-1.30123e+06	-1.30111e+06		7-CHO-2-CHCH2		0.658795	0.209449	-1.30092e+06	-1.3008e+06
1	2	3		Vinyl	Vinyl	formyl		8-CHO-7-CHCH2	420.7	585.1	2.947	2.11896	2.68941	1.85225	460.995	669.352	1.80869	0.294646	-2033.58	-2033.81			-0.518078	-0.368078	0.838757	0.195573	-1.27656e+06	-1.27643e+06		8-CHO-7-CHCH2		0.641883	0.192537	-1.27625e+06	-1.27613e+06
1	1	2		formyl	Vinyl			3-CHO-7-CHCH2	410.6	603	3.01949	2.05606	2.73194	1.78111	453.819	696.084	1.70561	0.191575	-2034.82	-2035.04			-0.515461	-0.365461	0.770241	0.127057	-1.27733e+06	-1.27721e+06		3-CHO-7-CHCH2		0.577704	0.128358	-1.27703e+06	-1.27691e+06
1	2	3	Vinyl	Vinyl		formyl		8-CHO-2-CHCH2	389.9	588.4	3.1798	2.10708	2.82597	1.83881	438.718	674.244	1.82376	0.30972	-2033.58	-2033.81			-0.507675	-0.357675	0.835721	0.192537	-1.27656e+06	-1.27643e+06		8-CHO-2-CHCH2		0.639281	0.189935	-1.27625e+06	-1.27613e+06
1	2	3		Vinyl	formyl		Vinyl	7-CHO-12-CHCH2	427.1	584	2.90284	2.12295	2.66351	1.85676	465.478	667.725	1.7508	0.236765	-2072.9	-2073.13			-0.502211	-0.352211	0.859138	0.215954	-1.30124e+06	-1.30111e+06		7-CHO-12-CHCH2		0.659662	0.210317	-1.30093e+06	-1.30081e+06
1	1	2	Vinyl	formyl				3-CHO-2-CHCH2	401.4	615	3.0887	2.01594	2.77253	1.73574	447.174	714.278	1.70332	0.189283	-2034.82	-2035.04			-0.480934	-0.330934	0.7594	0.116216	-1.27733e+06	-1.27721e+06		3-CHO-2-CHCH2		0.565996	0.11665	-1.27702e+06	-1.27691e+06
1	2	3		Vinyl		formyl	Vinyl	8-CHO-12-CHCH2	418.9	595.7	2.95967	2.08126	2.69684	1.80961	459.725	685.124	1.795	0.280959	-2033.59	-2033.82			-0.478474	-0.328474	0.835721	0.192537	-1.27656e+06	-1.27644e+06		8-CHO-12-CHCH2		0.636679	0.187334	-1.27625e+06	-1.27614e+06
1	1	2		formyl			Vinyl	3-CHO-12-CHCH2	410.5	616.7	3.02023	2.01038	2.73237	1.72946	453.747	716.874	1.67788	0.163844	-2034.82	-2035.05			-0.476384	-0.326384	0.757666	0.114482	-1.27733e+06	-1.27721e+06		3-CHO-12-CHCH2		0.560792	0.111446	-1.27703e+06	-1.27691e+06
1	1	2	formyl	Vinyl				2-CHO (chlorophyll f)	392.7	601.9	3.15713	2.05982	2.81267	1.78536	440.792	694.427	1.79405	0.280013	-2034.81	-2035.04			-0.464638	-0.314638	0.825314	0.18213	-1.27733e+06	-1.27721e+06		2-CHO		0.63321	0.183864	-1.27702e+06	-1.27691e+06
1	2	3	formyl	Vinyl	Vinyl			2-CHO-7-CHCH2	403.5	600.9	3.07262	2.06325	2.7631	1.78924	448.7	692.923	1.82237	0.308328	-2072.89	-2073.12			-0.430787	-0.280787	0.863041	0.219857	-1.30123e+06	-1.30111e+06		2-CHO-7-CHCH2		0.667902	0.218556	-1.30092e+06	-1.3008e+06
1	2	3	formyl	Vinyl		Vinyl		8-CHCH2-2-CHO	405.7	602.3	3.05596	2.05845	2.75333	1.78381	450.293	695.03	1.82654	0.312501	-2033.58	-2033.81			-0.428833	-0.278833	0.859572	0.216388	-1.27656e+06	-1.27643e+06		2-CHO-8-CHCH2		0.67961	0.230264	-1.27625e+06	-1.27613e+06
2	0	2		formyl	formyl			3-CHO-7-CHO	425.3	589.4	2.91513	2.1035	2.67071	1.83476	464.222	675.73	1.91923	0.405192	-2070.73	-2070.97			-0.428612	-0.278612	0.910741	0.267557	-1.29988e+06	-1.29976e+06		3-CHO-7-CHO		0.727311	0.277965	-1.29957e+06	-1.29945e+06
2	0	2		formyl		formyl		8-CHO-3-CHO	425.8	596.4	2.91171	2.07881	2.66871	1.80684	464.571	686.171	1.97773	0.463689	-2031.42	-2031.66			-0.4124	-0.2624	0.899033	0.255849	-1.27521e+06	-1.27508e+06		8-CHO-3-CHO		0.712567	0.263221	-1.2749e+06	-1.27478e+06
1	1	2		Vinyl			formyl	12-CHO	373.9	597.5	3.31587	2.07499	2.90579	1.80252	426.667	687.819	1.79917	0.285126	-2034.81	-2035.04			-0.385089	-0.235089	0.922016	0.278832	-1.27733e+06	-1.27721e+06		12-CHO		0.725576	0.27623	-1.27703e+06	-1.27691e+06
2	1	3		Vinyl	formyl	formyl		8-CHO-7-CHO	432.1 and 464.2	572.6	#VALUE!	2.16522	#VALUE!	1.90456	469 and 491	650.967	2.07282	0.55878	-2069.5	-2069.74			-0.357905	-0.207905	1.05124	0.408058	-1.29911e+06	-1.29898e+06		8-CHO-7-CHO		0.860005	0.410659	-1.2988e+06	-1.29867e+06
1	2	3		Vinyl	Vinyl		formyl	12-CHO-7-CHCH2	394.0 shoulder at 425	599.1	#VALUE!	2.06944	#VALUE!	1.79625	442 sh. 464	690.219	1.82582	0.311781	-2072.89	-2073.12			-0.346733	-0.196733	0.954106	0.310922	-1.30123e+06	-1.30111e+06		12-CHO-7-CHCH2		0.754197	0.304851	-1.30092e+06	-1.3008e+06
1	2	3		Vinyl		Vinyl	formyl	8-CHCH2-12-CHO	393 and 423.2	602.6	#VALUE!	2.05742	#VALUE!	1.78266	441 and 463	695.482	1.82227	0.308226	-2033.58	-2033.81			-0.338344	-0.188344	0.948902	0.305718	-1.27656e+06	-1.27643e+06		12-CHO-8-CHCH2		0.748126	0.29878	-1.27625e+06	-1.27613e+06
2	1	3	formyl	Vinyl		formyl		8-CHO-2-CHO	429.3	599	2.88797	2.06979	2.65478	1.79664	467.008	690.069	2.03668	0.522637	-2069.5	-2069.74			-0.328477	-0.178477	0.972752	0.329568	-1.29911e+06	-1.29898e+06		8-CHO-2-CHO		0.784985	0.335639	-1.2988e+06	-1.29868e+06
2	1	3	formyl	Vinyl	formyl			2-CHO-7-CHO	430.4	595.1	2.88059	2.08335	2.65045	1.81198	467.771	684.227	2.00273	0.488692	-2108.81	-2109.05			-0.326037	-0.176037	0.990532	0.347348	-1.32379e+06	-1.32366e+06		2-CHO-7-CHO		0.801464	0.352118	-1.32347e+06	-1.32335e+06
1	2	3	Vinyl	Vinyl			formyl	12-CHO-2-CHCH2	394.6	609.8	3.14193	2.03313	2.80375	1.75518	442.194	706.367	1.81607	0.30203	-2072.89	-2073.12			-0.314341	-0.164341	0.945433	0.302249	-1.30123e+06	-1.30111e+06		12-CHO-2-CHCH2		0.746825	0.297479	-1.30092e+06	-1.3008e+06
2	0	2	formyl	formyl				2-CHO-3-CHO	407.2	614.1	3.04471	2.0189	2.74672	1.73909	451.376	712.906	2.00812	0.494075	-2070.72	-2070.96			-0.258347	-0.108347	0.985328	0.342144	-1.29988e+06	-1.29975e+06		2-CHO-3-CHO		0.799729	0.350383	-1.29956e+06	-1.29944e+06
2	1	3		Vinyl	formyl		formyl	12-CHO-7-CHO	425.1	595.9	2.9165	2.08056	2.67152	1.80882	464.082	685.423	2.0083	0.494264	-2108.81	-2109.05			-0.253491	-0.103491	1.05991	0.41673	-1.32379e+06	-1.32366e+06		12-CHO-7-CHO		0.86651	0.417164	-1.32347e+06	-1.32335e+06
1	2	3	formyl	Vinyl			Vinyl	2-CHO-12-CHCH2	404.4	619.1	3.06579	2.00259	2.75909	1.72065	449.352	720.546	1.78511	0.271075	-2072.9	-2073.13			-0.240775	-0.0907753	0.984461	0.341277	-1.30123e+06	-1.30111e+06		2-CHO-12-CHCH2		0.799295	0.34995	-1.30092e+06	-1.3008e+06
2	0	2		formyl			formyl	3-CHO-12-CHO	412.3	616.4	3.00704	2.01136	2.72463	1.73057	455.035	716.415	1.97199	0.457946	-2070.73	-2070.97			-0.235084	-0.085084	1.00007	0.356888	-1.29988e+06	-1.29976e+06		3-CHO-12-CHO		0.811437	0.362092	-1.29957e+06	-1.29945e+06
2	1	3		Vinyl		formyl	formyl	8-CHO-12-CHO	411.9	607.8	3.00996	2.03982	2.72634	1.76275	454.75	703.335	2.0693	0.555258	-2069.5	-2069.73			-0.210461	-0.0604609	1.05688	0.413695	-1.29911e+06	-1.29898e+06		8-CHO-12-CHO		0.865643	0.416297	-1.2988e+06	-1.29867e+06
2	1	3	formyl	Vinyl			formyl	2-CHO-12-CHO	410.3	627.6	3.0217	1.97547	2.73323	1.68997	453.604	733.623	2.04571	0.53167	-2108.81	-2109.05			-0.147225	0.00277471	1.04734	0.404155	-1.32378e+06	-1.32366e+06		2-CHO-12-CHO		0.853934	0.404588	-1.32347e+06	-1.32334e+06
1	2	3	formyl	Vinyl		Vinyl		2-CHO-8-CHCH2_a	405.6	599.4	3.05672	2.06841	2.75377	1.79508	450.221	690.669	1.81319	0.299152	-2033.58	-2033.81
1	1	2		formyl		Vinyl		3-CHO-8-CHCH2_a	413.1	601.4	3.00122	2.06153	2.72122	1.7873	455.607	693.675	1.72586	0.211816	-1995.51	-1995.73
								Chl_c1									1.89472	0.380684	-2146.95	-2147.18
								Chl_c2									1.92678	0.412736	-2145.71	-2145.95
								new_Chl_b									1.82654	0.312504	-2034.81	-2035.04
								Pchlide_a									1.76886	0.254816	-1959.61	-1959.83
								scrambled_Chl_c1									1.92442	0.410381	-2146.94	-2147.18
								scrambled_Chl_c2									1.95379	0.439753	-2145.71	-2145.95

## Sheet: All data , neatly disposed by groups of changes
# formyl	# vinyl		2	3	7	8	12				TDDFT-result	TDDFT-result					Predicted “actual” position of the band	Predicted “actual” position of the band	Chl+/Chl vs. Chlide a 6-311G(d,p) in solution	Chl+/Chl vs. Chlide a 6-31G(d) in solution	Chl+/Chl vs. Chlide a 6-31G(d) gas phase
											B-band	Q-band	B-band (eV)	Q-band (eV)	predicted actual B-band (eV)	predicted actual Q-band (eV)	predicted B-band (nm)	predicted Q-band (nm)
0	2	2	Vinyl	Vinyl				2-CHCH2	2-CHCH2	3-CHCH2	386.1	591.3	3.2111	2.09674	2.84433	1.82712	435.886	678.557	0.0268858	0.0221158	0.0179039
0	3	3	Vinyl	Vinyl	Vinyl			2-CHCH2-7-CHCH2	2-CHCH2	7-CHCH2	398.2	590.4	3.11352	2.09994	2.78709	1.83073	444.838	677.217	0.066781	0.0572408	0.0481088
0	3	3	Vinyl	Vinyl		Vinyl		8-CHCH2-2-CHCH2	2-CHCH2	8-CHCH2	400.5	591.9	3.09564	2.09462	2.7766	1.82472	446.518	679.45	0.0633118	0.0555062	0.0556502
0	3	3	Vinyl	Vinyl			Vinyl	2-CHCH2-12-CHCH2	2-CHCH2	12-CHCH2	395.3	612.7	3.13636	2.02351	2.80049	1.7443	442.71	710.774	0.0429306	0.0299213	0.00943029
0	1	1				Vinyl		8-CHCH2-3-CH3	3-CH3	8-CHCH2	388.2	570.9	3.19373	2.17167	2.83414	1.91185	437.454	648.485	0.000867285	-0.000433643	0.00678699
0	0	0						3-CH3	3-CH3		371.7	568.4	3.3355	2.18122	2.9173	1.92265	424.983	644.842	-0.0385942	-0.036426	-0.0335339
0	1	1		Vinyl				3-CHCH2 (chlorophyll a)	3-CHCH2		378.5	578.5	3.27557	2.14314	2.88215	1.87958	430.166	659.616	0	0	0
0	3	3	Vinyl	Vinyl	Vinyl			2-CHCH2-7-CHCH2	7-CHCH2	2-CHCH2	398.2	590.4	3.11352	2.09994	2.78709	1.83073	444.838	677.217	0.066781	0.0572408	0.0481088
0	2	2		Vinyl	Vinyl			7-CHCH2	7-CHCH2	3-CHCH2	390	577.4	3.17898	2.14722	2.82549	1.8842	438.792	658	0.0420633	0.036426	0.0309714
0	3	3		Vinyl	Vinyl	Vinyl		8-CHCH2-7-CHCH2	7-CHCH2	8-CHCH2	402.5	580	3.08026	2.13759	2.76758	1.87332	447.974	661.823	0.0724183	0.0646127	0.0634471
0	3	3		Vinyl	Vinyl		Vinyl	7-CHCH2-12-CHCH2	7-CHCH2	12-CHCH2	395.6	599.9	3.13398	2.06668	2.7991	1.79313	442.93	691.42	0.0524707	0.0390278	0.021358
0	3	3	Vinyl	Vinyl		Vinyl		8-CHCH2-2-CHCH2	8-CHCH2	2-CHCH2	400.5	591.9	3.09564	2.09462	2.7766	1.82472	446.518	679.45	0.0633118	0.0555062	0.0556502
0	1	1				Vinyl		8-CHCH2-3-CH3	8-CHCH2	3-CH3	388.2	570.9	3.19373	2.17167	2.83414	1.91185	437.454	648.485	0.000867285	-0.000433643	0.00678699
0	2	2		Vinyl		Vinyl		8-CHCH2	8-CHCH2	3-CHCH2	391.3	578.8	3.16842	2.14203	2.8193	1.87833	439.756	660.057	0.0385942	0.0342578	0.0333878
0	3	3		Vinyl	Vinyl	Vinyl		8-CHCH2-7-CHCH2	8-CHCH2	7-CHCH2	402.5	580	3.08026	2.13759	2.76758	1.87332	447.974	661.823	0.0724183	0.0646127	0.0634471
0	3	3		Vinyl		Vinyl	Vinyl	8-CHCH2-12-CHCH2	8-CHCH2	12-CHCH2	395.1	597.4	3.13795	2.07533	2.80142	1.80291	442.562	687.669	0.0745865	0.0650464	0.0516652
0	3	3	Vinyl	Vinyl			Vinyl	2-CHCH2-12-CHCH2	12-CHCH2	2-CHCH2	395.3	612.7	3.13636	2.02351	2.80049	1.7443	442.71	710.774	0.0429306	0.0299213	0.00943029
0	2	2		Vinyl			Vinyl	12-CHCH2	12-CHCH2	3-CHCH2	385.4	595.3	3.21693	2.08265	2.84775	1.81119	435.363	684.526	0.0368596	0.030355	0.0157731
0	3	3		Vinyl	Vinyl		Vinyl	7-CHCH2-12-CHCH2	12-CHCH2	7-CHCH2	395.6	599.9	3.13398	2.06668	2.7991	1.79313	442.93	691.42	0.0524707	0.0390278	0.021358
0	3	3		Vinyl		Vinyl	Vinyl	8-CHCH2-12-CHCH2	12-CHCH2	8-CHCH2	395.1	597.4	3.13795	2.07533	2.80142	1.80291	442.562	687.669	0.0745865	0.0650464	0.0516652
1	1	2	Vinyl	formyl				3-CHO-2-CHCH2	2-CHCH2	3-CHO	401.4	615	3.0887	2.01594	2.77253	1.73574	447.174	714.278	0.116216	0.11665	0.189283
1	2	3	Vinyl	Vinyl	formyl			7-CHO-2-CHCH2	2-CHCH2	7-CHO	423.3	580.7	2.9289	2.13502	2.67879	1.8704	462.822	662.854	0.211618	0.209449	0.257203
1	2	3	Vinyl	Vinyl		formyl		8-CHO-2-CHCH2	2-CHCH2	8-CHO	389.9	588.4	3.1798	2.10708	2.82597	1.83881	438.718	674.244	0.192537	0.189935	0.30972
1	2	3	Vinyl	Vinyl			formyl	12-CHO-2-CHCH2	2-CHCH2	12-CHO	394.6	609.8	3.14193	2.03313	2.80375	1.75518	442.194	706.367	0.302249	0.297479	0.30203
1	1	2	formyl	Vinyl				2-CHO (chlorophyll f)	2-CHO	3-CHCH2	392.7	601.9	3.15713	2.05982	2.81267	1.78536	440.792	694.427	0.18213	0.183864	0.280013
1	2	3	formyl	Vinyl	Vinyl			2-CHO-7-CHCH2	2-CHO	7-CHCH2	403.5	600.9	3.07262	2.06325	2.7631	1.78924	448.7	692.923	0.219857	0.218556	0.308328
1	2	3	formyl	Vinyl		Vinyl		2-CHO-8-CHCH2	2-CHO	8-CHCH2	405.7	602.3	3.05596	2.05845	2.75333	1.78381	450.293	695.03	0.216388	0.230264	0.312501
1	2	3	formyl	Vinyl		Vinyl		2-CHO-8-CHCH2_a	2-CHO	8-CHCH2_a	405.6	599.4	3.05672	2.06841	2.75377	1.79508	450.221	690.669			0.299152
1	2	3	formyl	Vinyl			Vinyl	2-CHO-12-CHCH2	2-CHO	12-CHCH2	404.4	619.1	3.06579	2.00259	2.75909	1.72065	449.352	720.546	0.341277	0.34995	0.271075
1	1	2		Vinyl		formyl		8-CHO-3-CH3	3-CH3	8-CHO	402.1	572.2	3.08332	2.16673	2.76938	1.90627	447.683	650.383	0.110579	0.113614	0.245707
1	0	1		formyl				3-CHO (chlorophyll d)	3-CHO		398.9	600.7	3.10806	2.06393	2.78389	1.79002	445.35	692.622	0.0932331	0.0993041	0.176377
1	1	2	Vinyl	formyl				3-CHO-2-CHCH2	3-CHO	2-CHCH2	401.4	615	3.0887	2.01594	2.77253	1.73574	447.174	714.278	0.116216	0.11665	0.189283
1	1	2		formyl	Vinyl			3-CHO-7-CHCH2	3-CHO	7-CHCH2	410.6	603	3.01949	2.05606	2.73194	1.78111	453.819	696.084	0.127057	0.128358	0.191575
1	1	2		formyl		Vinyl		3-CHO-8-CHCH2	3-CHO	8-CHCH2	409.7	600.6	3.02613	2.06428	2.73583	1.7904	453.174	692.472	0.127057	0.150908	0.211583
1	1	2		formyl		Vinyl		3-CHO-8-CHCH2_a	3-CHO	8-CHCH2_a	413.1	601.4	3.00122	2.06153	2.72122	1.7873	455.607	693.675		0.150908	0.194872
1	1	2		formyl			Vinyl	3-CHO-12-CHCH2	3-CHO	12-CHCH2	410.5	616.7	3.02023	2.01038	2.73237	1.72946	453.747	716.874	0.114482	0.111446	0.163844
1	2	3	formyl	Vinyl	Vinyl			2-CHO-7-CHCH2	7-CHCH2	2-CHO	403.5	600.9	3.07262	2.06325	2.7631	1.78924	448.7	692.923	0.219857	0.218556	0.308328
1	1	2		formyl	Vinyl			3-CHO-7-CHCH2	7-CHCH2	3-CHO	410.6	603	3.01949	2.05606	2.73194	1.78111	453.819	696.084	0.127057	0.128358	0.191575
1	2	3		Vinyl	Vinyl	formyl		8-CHO-7-CHCH2	7-CHCH2	8-CHO	420.7	585.1	2.947	2.11896	2.68941	1.85225	460.995	669.352	0.195573	0.192537	0.294646
1	2	3		Vinyl	Vinyl		formyl	12-CHO-7-CHCH2	7-CHCH2	12-CHO	394.0 and shoulder at 425	599.1	#VALUE!	2.06944	#VALUE!	1.79625	#VALUE!	690.219	0.310922	0.304851	0.311781
1	2	3	Vinyl	Vinyl	formyl			7-CHO-2-CHCH2	7-CHO	2-CHCH2	423.3	580.7	2.9289	2.13502	2.67879	1.8704	462.822	662.854	0.211618	0.209449	0.257203
1	1	2		Vinyl	formyl			7-CHO (chlorophyll b)	7-CHO	3-CHCH2	415.4	569.7	2.9846	2.17624	2.71147	1.91702	457.245	646.735	0.195139	0.196874	0.244759
1	2	3		Vinyl	formyl	Vinyl		8-CHCH2-7-CHO	7-CHO	8-CHCH2	425.6	575.2	2.91307	2.15543	2.66951	1.89349	464.432	654.773	0.210317	0.208582	0.25702
1	2	3		Vinyl	formyl		Vinyl	7-CHO-12-CHCH2	7-CHO	12-CHCH2	427.1	584	2.90284	2.12295	2.66351	1.85676	465.478	667.725	0.215954	0.210317	0.236765
1	2	3	formyl	Vinyl		Vinyl		2-CHO-8-CHCH2	8-CHCH2	2-CHO	405.7	602.3	3.05596	2.05845	2.75333	1.78381	450.293	695.03	0.216388	0.230264	0.312501
1	1	2		formyl		Vinyl		3-CHO-8-CHCH2	8-CHCH2	3-CHO	409.7	600.6	3.02613	2.06428	2.73583	1.7904	453.174	692.472	0.127057	0.150908	0.211583
1	1	2		formyl		Vinyl		8-CHCH2-3-CHO	8-CHCH2	3-CHO	413.1	601.4	3.00122	2.06153	2.72122	1.7873	455.607	693.675		0.150908	0.194872
1	2	3		Vinyl	formyl	Vinyl		8-CHCH2-7-CHO	8-CHCH2	7-CHO	425.6	575.2	2.91307	2.15543	2.66951	1.89349	464.432	654.773	0.210317	0.208582	0.25702
1	2	3		Vinyl		Vinyl	formyl	8-CHCH2-12-CHO	8-CHCH2	12-CHO	393	602.6	3.15472	2.05742	2.81126	1.78266	441.014	695.482	0.305718	0.29878	0.308226
1	2	3	formyl	Vinyl		Vinyl		2-CHO-8-CHCH2_a	8-CHCH2_a	2-CHO	405.6	599.4	3.05672	2.06841	2.75377	1.79508	450.221	690.669			0.299152
1	1	2		formyl		Vinyl		3-CHO-8-CHCH2_a	8-CHCH2_a	3-CHO	413.1	601.4	3.00122	2.06153	2.72122	1.7873	455.607	693.675			0.211816
1	2	3	Vinyl	Vinyl		formyl		8-CHO-2-CHCH2	8-CHO	2-CHCH2	389.9	588.4	3.1798	2.10708	2.82597	1.83881	438.718	674.244	0.192537	0.189935	0.30972
1	1	2		Vinyl		formyl		8-CHO-3-CH3	8-CHO	3-CH3	402.1	572.2	3.08332	2.16673	2.76938	1.90627	447.683	650.383	0.110579	0.113614	0.245707
1	1	2		Vinyl		formyl		8-CHO	8-CHO	3-CHCH2	409.2	579	3.02982	2.14129	2.73799	1.87749	452.815	660.352	0.173023	0.176059	0.29933
1	2	3		Vinyl	Vinyl	formyl		8-CHO-7-CHCH2	8-CHO	7-CHCH2	420.7	585.1	2.947	2.11896	2.68941	1.85225	460.995	669.352	0.195573	0.192537	0.294646
1	2	3		Vinyl		formyl	Vinyl	8-CHO-12-CHCH2	8-CHO	12-CHCH2	418.9	595.7	2.95967	2.08126	2.69684	1.80961	459.725	685.124	0.192537	0.187334	0.280959
1	2	3	formyl	Vinyl			Vinyl	2-CHO-12-CHCH2	12-CHCH2	2-CHO	404.4	619.1	3.06579	2.00259	2.75909	1.72065	449.352	720.546	0.341277	0.34995	0.271075
1	1	2		formyl			Vinyl	3-CHO-12-CHCH2	12-CHCH2	3-CHO	410.5	616.7	3.02023	2.01038	2.73237	1.72946	453.747	716.874	0.114482	0.111446	0.163844
1	2	3		Vinyl	formyl		Vinyl	7-CHO-12-CHCH2	12-CHCH2	7-CHO	427.1	584	2.90284	2.12295	2.66351	1.85676	465.478	667.725	0.215954	0.210317	0.236765
1	2	3		Vinyl		formyl	Vinyl	8-CHO-12-CHCH2	12-CHCH2	8-CHO	418.9	595.7	2.95967	2.08126	2.69684	1.80961	459.725	685.124	0.192537	0.187334	0.280959
1	2	3	Vinyl	Vinyl			formyl	12-CHO-2-CHCH2	12-CHO	2-CHCH2	394.6	609.8	3.14193	2.03313	2.80375	1.75518	442.194	706.367	0.302249	0.297479	0.30203
1	1	2		Vinyl			formyl	12-CHO	12-CHO	3-CHCH2	373.9	597.5	3.31587	2.07499	2.90579	1.80252	426.667	687.819	0.278832	0.27623	0.285126
1	2	3		Vinyl	Vinyl		formyl	12-CHO-7-CHCH2	12-CHO	7-CHCH2	394.0 and shoulder at 425	599.1	#VALUE!	2.06944	#VALUE!	1.79625	#VALUE!	690.219	0.310922	0.304851	0.311781
1	2	3		Vinyl		Vinyl	formyl	8-CHCH2-12-CHO	12-CHO	8-CHCH2	393	602.6	3.15472	2.05742	2.81126	1.78266	441.014	695.482	0.305718	0.29878	0.308226
2	0	2	formyl	formyl				2-CHO-3-CHO	2-CHO	3-CHO	407.2	614.1	3.04471	2.0189	2.74672	1.73909	451.376	712.906	0.342144	0.350383	0.494075
2	1	3	formyl	Vinyl	formyl			2-CHO-7-CHO	2-CHO	7-CHO	430.4	595.1	2.88059	2.08335	2.65045	1.81198	467.771	684.227	0.347348	0.352118	0.488692
2	1	3	formyl	Vinyl		formyl		8-CHO-2-CHO	2-CHO	8-CHO	429.3	599	2.88797	2.06979	2.65478	1.79664	467.008	690.069	0.329568	0.335639	0.522637
2	1	3	formyl	Vinyl			formyl	2-CHO-12-CHO	2-CHO	12-CHO	410.3	627.6	3.0217	1.97547	2.73323	1.68997	453.604	733.623	0.404155	0.404588	0.53167
2	0	2	formyl	formyl				2-CHO-3-CHO	3-CHO	2-CHO	407.2	614.1	3.04471	2.0189	2.74672	1.73909	451.376	712.906	0.342144	0.350383	0.494075
2	0	2		formyl	formyl			3-CHO-7-CHO	3-CHO	7-CHO	425.3	589.4	2.91513	2.1035	2.67071	1.83476	464.222	675.73	0.267557	0.277965	0.405192
2	0	2		formyl		formyl		8-CHO-3-CHO	3-CHO	8-CHO	425.8	596.4	2.91171	2.07881	2.66871	1.80684	464.571	686.171	0.255849	0.263221	0.463689
2	0	2		formyl			formyl	3-CHO-12-CHO	3-CHO	12-CHO	412.3	616.4	3.00704	2.01136	2.72463	1.73057	455.035	716.415	0.356888	0.362092	0.457946
2	1	3	formyl	Vinyl	formyl			2-CHO-7-CHO	7-CHO	2-CHO	430.4	595.1	2.88059	2.08335	2.65045	1.81198	467.771	684.227	0.347348	0.352118	0.488692
2	0	2		formyl	formyl			3-CHO-7-CHO	7-CHO	3-CHO	425.3	589.4	2.91513	2.1035	2.67071	1.83476	464.222	675.73	0.267557	0.277965	0.405192
2	1	3		Vinyl	formyl	formyl		8-CHO-7-CHO	7-CHO	8-CHO	464.2	572.6	2.67084	2.16522	2.52742	1.90456	490.542	650.967	0.408058	0.410659	0.55878
2	1	3		Vinyl	formyl		formyl	12-CHO-7-CHO	7-CHO	12-CHO	425.1	595.9	2.9165	2.08056	2.67152	1.80882	464.082	685.423	0.41673	0.417164	0.494264
2	1	3	formyl	Vinyl		formyl		8-CHO-2-CHO	8-CHO	2-CHO	429.3	599	2.88797	2.06979	2.65478	1.79664	467.008	690.069	0.329568	0.335639	0.522637
2	0	2		formyl		formyl		8-CHO-3-CHO	8-CHO	3-CHO	425.8	596.4	2.91171	2.07881	2.66871	1.80684	464.571	686.171	0.255849	0.263221	0.463689
2	1	3		Vinyl	formyl	formyl		8-CHO-7-CHO	8-CHO	7-CHO	464.2	572.6	2.67084	2.16522	2.52742	1.90456	490.542	650.967	0.408058	0.410659	0.55878
2	1	3		Vinyl		formyl	formyl	8-CHO-12-CHO	8-CHO	12-CHO	411.9	607.8	3.00996	2.03982	2.72634	1.76275	454.75	703.335	0.413695	0.416297	0.555258
2	1	3	formyl	Vinyl			formyl	2-CHO-12-CHO	12-CHO	2-CHO	410.3	627.6	3.0217	1.97547	2.73323	1.68997	453.604	733.623	0.404155	0.404588	0.53167
2	0	2		formyl			formyl	3-CHO-12-CHO	12-CHO	3-CHO	412.3	616.4	3.00704	2.01136	2.72463	1.73057	455.035	716.415	0.356888	0.362092	0.457946
2	1	3		Vinyl	formyl		formyl	12-CHO-7-CHO	12-CHO	7-CHO	425.1	595.9	2.9165	2.08056	2.67152	1.80882	464.082	685.423	0.41673	0.417164	0.494264
2	1	3		Vinyl		formyl	formyl	8-CHO-12-CHO	12-CHO	8-CHO	411.9	607.8	3.00996	2.03982	2.72634	1.76275	454.75	703.335	0.413695	0.416297	0.555258
								new_Chl_b
								Pchlide_a
								scrambled_Chl_c1
								scrambled_Chl_c2
								Chl_c1
								Chl_c2
